# Supplementary material for: Cannabidiol (CBD) modulates the transcriptional profile of ethanol-exposed human dermal fibroblast cells
Source: J Appl Genet. 2024 Oct 28;65(4):773–96. doi: 10.1007/s13353-024-00915-7 (PMC11561130; doi:10.1007/s13353-024-00915-7)
Supplement: Supplementary file 2 — Supplementary file2 (XLSX 15 KB) [file 13353_2024_915_MOESM2_ESM.xlsx]

## Sheet: Arkusz1
SampleID	Raw reads (No)	Filtered reads (No)	Filtered reads (%)	Uniquely mapped reads (No)	Uniquely mapped reads (%)	Mapped to multiple loci (No)	Mapped to multiple loci (%)	Assigned to genes (No)	Assigned to genes (%)	Assigned to genes of Uniquely mapped reads (%)
K10	7079050	4729239	66.8061	3432429	72.5789	441347	9.3323	2288792	48.3966	66.6814
K11	6394311	4319915	67.5587	2997431	69.3863	405010	9.37542	1857656	43.0021	61.9749
K12	7577474	5046380	66.5971	3656038	72.4487	472896	9.37099	2505462	49.6487	68.5294
K13	7477671	5161684	69.028	2613195	50.6268	456618	8.8463	1626844	31.5177	62.255
K14	6898976	4359630	63.1924	2319580	53.2059	388775	8.91761	1682270	38.5874	72.5248
K16	7506626	4496736	59.9036	2791798	62.085	488012	10.8526	1819556	40.4639	65.1751
K17	7085460	4171970	58.8807	2518212	60.3603	402751	9.65374	1667178	39.9614	66.2048
K1	6528543	4695183	71.9178	3351190	71.3751	455018	9.69117	2221103	47.306	66.278
K20	6114481	3889482	63.611	2031014	52.2181	386690	9.94194	1272364	32.7129	62.6467
K21	6917710	4616917	66.7405	2516704	54.5105	419100	9.07749	1697601	36.7691	67.4533
K22	8165176	6056933	74.1801	2600096	42.9276	480859	7.93898	1758132	29.0268	67.618
K23	7584260	5733494	75.5973	3117285	54.3697	561416	9.79187	1806238	31.5033	57.9427
K25	7289996	5039948	69.1351	2980572	59.1389	478655	9.49722	2003459	39.7516	67.2173
K26	7775962	5845172	75.1698	4097752	70.1049	518929	8.87791	2773517	47.4497	67.6839
K27	7554262	5323076	70.4645	2709941	50.9093	477146	8.96373	1719830	32.309	63.4637
K28	6597520	4604312	69.7885	2738032	59.4667	409733	8.8989	1842535	40.0176	67.2941
K29	6601634	5219031	79.0567	2325257	44.5534	433714	8.31024	1510863	28.9491	64.9762
K2	6628116	4203053	63.4125	3016316	71.7649	402137	9.56774	2335080	55.5568	77.415
K30	6034375	4683738	77.6176	2857805	61.0155	397371	8.48406	1837931	39.2407	64.3127
K32	6791001	4965127	73.1133	3480166	70.0922	497725	10.0244	2165732	43.6189	62.2307
K33	6012969	4407132	73.2938	2008214	45.5674	383516	8.70217	1320676	29.9668	65.7637
K34	6387561	5270437	82.5109	1901988	36.0879	344279	6.53227	1159135	21.9931	60.9433
K35	7329799	5666059	77.3017	2324758	41.0295	429286	7.57645	1543443	27.2402	66.3916
K36	9027673	6308854	69.8835	3482220	55.1958	570421	9.04159	2065719	32.7432	59.3219
K37	5609808	4479492	79.8511	1781516	39.7705	319344	7.12902	1024845	22.8786	57.5266
K38	5906848	4695713	79.4961	1793207	38.1882	332322	7.07714	1079891	22.9974	60.2212
K39	5504229	4238847	77.0107	2222970	52.4428	348052	8.21101	1629466	38.4413	73.3013
K3	6802496	4524669	66.5148	3438873	76.0028	417600	9.2294	2684481	59.3299	78.0628
K40	6122681	4757166	77.6974	2435744	51.2016	407736	8.57099	1585611	33.331	65.0976
K42	6489948	5087969	78.3977	3299439	64.8479	484207	9.5167	2419304	47.5495	73.3247
K43	5646522	4524487	80.1287	2219339	49.0517	354188	7.82825	1519785	33.5902	68.4792
K4	7122553	4908534	68.9154	3648236	74.3244	457326	9.31696	2498166	50.8943	68.476
K5	6788654	4455763	65.6354	3173035	71.2119	414818	9.3097	2446501	54.9064	77.1029
K6	6203613	3814476	61.488	2567665	67.3137	375966	9.85629	1895377	49.6891	73.8171
K7	5976086	3630650	60.753	2622602	72.2351	364596	10.0422	1768327	48.7055	67.4264
K8	5988708	4263249	71.1881	2825765	66.282	431539	10.1223	1851544	43.4304	65.5236
All (mean)	6.76452e+06	4.78318e+06	70.8844	2.7749e+06	58.4414	428030	8.98547	1.8579e+06	39.2632	66.6849
Sum	243522752	172194517	NA	99896384	NA	15409098	NA	66884414	NA	NA
