# Supplementary material for: Cannabidiol (CBD) modulates the transcriptional profile of ethanol-exposed human dermal fibroblast cells
Source: J Appl Genet. 2024 Oct 28;65(4):773–96. doi: 10.1007/s13353-024-00915-7 (PMC11561130; doi:10.1007/s13353-024-00915-7)
Supplement: Supplementary file 3 — Supplementary file3 (XLSX 24221 KB) [file 13353_2024_915_MOESM3_ESM.xlsx]

## Sheet: CBD 0.75uM_6h
	gene	Gene_name	baseMean	log2FoldChange	lfcSE	stat	pvalue	padj	K34	K35	K36	K13	K14
1	ENSG00000108518	PFN1	110.635	3.09814	0.667686	4.64012	3.48202e-06	0.0351928	26.9266	12.3069	42.6549	104.754	366.533
2	ENSG00000159403	C1R	188.27	2.34128	0.497753	4.70371	2.55481e-06	0.0351928	43.9329	88.1993	81.8136	491.097	236.306
3	ENSG00000131469	RPL27	247.061	1.92009	0.443738	4.32709	1.51094e-05	0.101807	120.461	129.222	101.393	279.666	604.564
4	ENSG00000277791	PSMB3	58.4256	3.21458	0.765271	4.20057	2.66241e-05	0.134545	4.25158	9.23015	25.8727	126.859	125.915
5	ENSG00000102317	RBM3	714.65	1.34895	0.335931	4.01556	5.9305e-05	0.199798	337.292	464.584	520.95	1238.79	1011.63
6	ENSG00000180035	ZNF48	17.4554	-7.43606	1.83432	-4.05386	5.03791e-05	0.199798	32.5954	39.9973	14.6845	0	0
7	ENSG00000102265	TIMP1	2506.82	1.27584	0.326978	3.9019	9.54415e-05	0.214362	1356.25	1260.43	2176.1	3606.82	4134.5
8	ENSG00000137309	HMGA1	554.762	1.39526	0.355477	3.92502	8.67233e-05	0.214362	272.101	295.365	438.437	797.672	970.235
9	ENSG00000171552	BCL2L1	269.862	-1.6042	0.408073	-3.93117	8.45343e-05	0.214362	433.661	408.178	265.02	135.508	106.942
10	ENSG00000159840	ZYX	89.8602	2.30524	0.625395	3.68605	0.000227763	0.432455	31.1782	29.7416	43.3542	84.5724	260.454
11	ENSG00000170515	PA2G4	354.357	1.41584	0.384977	3.67772	0.000235332	0.432455	218.248	155.887	262.922	644.865	489.861
12	ENSG00000224025	0	81.5331	-2.48397	0.688228	-3.60923	0.000307109	0.517326	187.069	131.273	46.1513	17.2989	25.8729
13	ENSG00000237053	FUCA1P1	12.7079	-6.97892	1.94867	-3.58137	0.000341796	0.531467	21.2579	31.7928	10.4889	0	0
14	ENSG00000130255	RPL36	746.311	1.15519	0.325063	3.55374	0.000379787	0.548359	403.9	490.224	606.26	1110.01	1121.16
15	ENSG00000084207	GSTP1	1228.09	1.12086	0.320409	3.49823	0.000468358	0.591711	661.829	796.87	1046.1	1963.43	1672.25
16	ENSG00000213741	RPS29	249.938	1.8922	0.538645	3.51289	0.000443267	0.591711	87.8659	97.4294	173.417	194.132	696.845
17	ENSG00000074800	ENO1	1388.39	1.06243	0.310131	3.42575	0.000613113	0.619673	945.267	837.893	1118.12	1707.79	2332.88
18	ENSG00000116688	MFN2	159.74	1.67294	0.483786	3.45802	0.000544164	0.619673	114.793	57.4321	83.9114	328.679	213.883
19	ENSG00000198712	MT-CO2	2265.15	1.16242	0.339224	3.42668	0.000610999	0.619673	1027.46	1683.99	1831.37	2806.27	3976.67
20	ENSG00000235137	HSP90AB6P	319.306	-1.65195	0.481432	-3.43132	0.000600652	0.619673	683.087	429.715	204.884	128.781	150.063
21	ENSG00000182378	PLCXD1	80.0752	2.16975	0.639378	3.39353	0.000689968	0.633955	21.2579	44.0996	34.2638	216.236	84.5183
22	ENSG00000198755	RPL10A	229.981	1.48104	0.435844	3.39811	0.000678544	0.633955	148.805	122.043	131.461	250.834	496.761
23	ENSG00000151320	AKAP6	10.8264	-6.74687	2.0313	-3.32145	0.00089551	0.739925	18.4235	28.716	6.99261	0	0
24	ENSG00000232611	0	10.5392	-6.71811	2.02633	-3.3154	0.000915114	0.739925	8.50315	24.6137	19.5793	0	0
25	ENSG00000244053	RPL13AP2	332.008	-1.68832	0.507277	-3.3282	0.000874082	0.739925	632.068	566.116	177.612	172.989	111.254
26	ENSG00000264513	0	10.2801	-6.67684	2.02071	-3.3042	0.000952495	0.740528	19.8407	11.2813	20.2786	0	0
27	ENSG00000182752	PAPPA	42.2074	-3.2353	0.991484	-3.26309	0.00110206	0.80769	56.6877	92.3015	48.249	0	13.7989
28	ENSG00000253854	0	10.3379	-6.68064	2.05002	-3.25881	0.0011188	0.80769	17.0063	27.6905	6.99261	0	0
29	ENSG00000099942	CRKL	70.5251	-2.13462	0.661087	-3.22895	0.00124247	0.863891	126.13	113.839	66.4298	13.4547	32.7724
30	ENSG00000110696	C11orf58	457.38	1.36061	0.425398	3.19843	0.00138176	0.863891	266.432	172.296	403.474	900.504	544.194
31	ENSG00000120699	EXOSC8	27.1709	-3.09608	0.974992	-3.1755	0.0014958	0.863891	29.761	54.3554	41.9557	2.88315	6.89945
32	ENSG00000167526	RPL13	570.73	1.16473	0.36435	3.19674	0.00138989	0.863891	282.021	345.618	514.656	792.866	918.49
33	ENSG00000198242	RPL23A	1776.87	1.0083	0.317024	3.18051	0.00147015	0.863891	1223.04	1327.09	1244.69	3180.11	1909.42
34	ENSG00000235581	0	38.9351	-2.98958	0.938518	-3.18543	0.00144538	0.863891	58.1049	89.2248	32.166	13.4547	1.72486
35	ENSG00000250346	EEF1GP2	10.0228	-6.63326	2.06338	-3.21475	0.00130556	0.863891	21.2579	22.5626	6.29335	0	0
36	ENSG00000072042	RDH11	195.898	-1.46886	0.478094	-3.07233	0.00212396	0.890714	184.235	210.242	394.383	109.56	81.0686
37	ENSG00000088727	KIF9	12.0357	5.12499	1.66006	3.08724	0.00202025	0.890714	0	0	2.09778	36.5199	21.5608
38	ENSG00000090238	YPEL3	139.43	-1.73221	0.566559	-3.05742	0.00223254	0.890714	253.677	236.907	90.2047	74.9619	41.3967
39	ENSG00000090621	PABPC4	467.47	1.04023	0.335855	3.09726	0.00195317	0.890714	277.77	366.129	341.24	696.761	655.448
40	ENSG00000106100	NOD1	10.0769	-6.63582	2.1251	-3.12259	0.00179269	0.890714	31.1782	16.4092	2.79705	0	0
41	ENSG00000107551	RASSF4	24.5994	-3.42845	1.10541	-3.10151	0.00192534	0.890714	39.6814	61.5344	14.6845	1.9221	5.17459
42	ENSG00000109861	CTSC	217.327	1.24785	0.408403	3.05544	0.00224728	0.890714	133.216	161.015	126.566	277.743	388.094
43	ENSG00000130706	ADRM1	101.102	1.6651	0.544472	3.05819	0.00222678	0.890714	32.5954	64.6111	64.332	149.924	194.047
44	ENSG00000144357	UBR3	73.8319	-1.77653	0.577791	-3.07469	0.00210722	0.890714	110.541	109.736	88.8062	30.7536	29.3227
45	ENSG00000162994	CLHC1	8.65595	-6.42852	2.09748	-3.06488	0.00217758	0.890714	15.5891	12.3069	15.3838	0	0
46	ENSG00000163682	RPL9	646.161	1.40468	0.449859	3.12249	0.00179331	0.890714	225.334	345.618	595.771	658.319	1405.76
47	ENSG00000173511	VEGFB	166.281	-1.54452	0.497127	-3.1069	0.00189061	0.890714	304.696	245.112	127.266	83.6114	70.7194
48	ENSG00000185432	METTL7A	11.6079	4.96438	1.61955	3.06528	0.00217466	0.890714	0	1.02557	1.39852	12.4937	43.1216
49	ENSG00000196151	WDSUB1	9.14077	-6.50796	2.06905	-3.14538	0.00165868	0.890714	15.5891	13.3324	16.7823	0	0
50	ENSG00000231341	VDAC1P6	28.3454	-2.97772	0.972762	-3.0611	0.00220526	0.890714	58.1049	52.3042	20.2786	6.72735	4.31216
51	ENSG00000259020	0	256.895	-1.50151	0.484158	-3.10127	0.00192691	0.890714	562.625	252.291	225.162	146.08	98.3172
52	ENSG00000147604	RPL7	1020.3	0.986158	0.324149	3.04229	0.00234782	0.91267	579.632	687.134	930.018	1437.73	1467
53	ENSG00000007944	MYLIP	8.69696	-6.42999	2.11868	-3.03491	0.00240607	0.917665	17.0063	19.4859	6.99261	0	0
54	ENSG00000039560	RAI14	1099.15	0.909905	0.30176	3.01532	0.00256704	0.918095	700.093	805.075	933.514	1468.48	1588.6
55	ENSG00000101938	CHRDL1	8.47696	-6.39731	2.12935	-3.00435	0.00266151	0.918095	18.4235	7.17901	16.7823	0	0
56	ENSG00000108179	PPIF	48.9791	2.29598	0.76988	2.98225	0.00286138	0.918095	15.5891	8.20458	32.8653	77.8451	110.391
57	ENSG00000124802	EEF1E1	53.5418	-2.23932	0.741177	-3.0213	0.0025169	0.918095	106.289	83.0714	45.452	9.6105	23.2857
58	ENSG00000131016	AKAP12	809.998	1.02965	0.344121	2.99211	0.00277058	0.918095	470.508	503.556	739.819	1342.59	993.521
59	ENSG00000148296	SURF6	83.7373	1.84035	0.615475	2.99014	0.00278853	0.918095	19.8407	38.9718	63.6328	147.041	149.201
60	ENSG00000149131	SERPING1	19.9612	3.16091	1.04477	3.02547	0.00248251	0.918095	4.25158	5.12786	4.89483	51.8967	33.6348
61	ENSG00000177706	FAM20C	91.0803	-1.66254	0.556958	-2.98503	0.0028355	0.918095	89.2831	125.12	161.529	43.2473	36.2221
62	ENSG00000230359	TPI1P2	98.6183	-1.76492	0.588252	-3.00027	0.00269739	0.918095	208.327	125.12	79.0165	46.1304	34.4973
63	ENSG00000272086	GOLPH3-DT	9.98923	-6.62455	2.2163	-2.98901	0.00279886	0.918095	29.761	19.4859	0.699261	0	0
64	ENSG00000161664	ASB16	6.79619	6.52113	2.19726	2.96784	0.00299898	0.936668	0	0	0	20.1821	13.7989
65	ENSG00000173546	CSPG4	179.244	1.30108	0.438589	2.96652	0.00301194	0.936668	121.879	118.966	98.5959	341.173	215.608
66	ENSG00000071246	VASH1	6.73199	6.50881	2.22721	2.9224	0.0034734	0.943439	0	0	0	8.64945	25.0105
67	ENSG00000116649	SRM	341.228	-1.10089	0.373083	-2.95078	0.00316968	0.943439	416.654	467.661	417.459	158.573	245.793
68	ENSG00000135999	EPC2	76.8465	-1.77578	0.601635	-2.95158	0.00316151	0.943439	109.124	118.966	93.701	20.1821	42.2591
69	ENSG00000149294	NCAM1	75.6404	-2.05015	0.700985	-2.92467	0.00344823	0.943439	148.805	121.018	55.9409	40.3641	12.074
70	ENSG00000163879	DNALI1	15.7292	-4.16972	1.42832	-2.91931	0.00350803	0.943439	18.4235	30.7672	26.5719	2.88315	0
71	ENSG00000164296	TIGD6	12.488	-5.47902	1.88944	-2.89982	0.00373381	0.943439	17.0063	27.6905	16.7823	0.96105	0
72	ENSG00000183513	COA5	8.39862	-6.39455	2.19133	-2.91811	0.00352155	0.943439	9.92034	4.10229	27.9705	0	0
73	ENSG00000204599	TRIM39	89.9284	-1.66676	0.573313	-2.90725	0.00364623	0.943439	133.216	145.631	93.0018	26.9094	50.8835
74	ENSG00000228501	RPL15P18	17.1334	-4.28322	1.47014	-2.91347	0.00357436	0.943439	45.3501	29.7416	7.69188	2.88315	0
75	ENSG00000255052	FAM66D	8.11147	-6.32608	2.15785	-2.93166	0.00337153	0.943439	21.2579	12.3069	6.99261	0	0
76	ENSG00000255928	0	8.2438	-6.36622	2.17478	-2.92729	0.00341926	0.943439	4.25158	19.4859	17.4815	0	0
77	ENSG00000257569	GSTP1P1	16.8412	-3.89978	1.34479	-2.89991	0.00373272	0.943439	32.5954	38.9718	9.0904	0.96105	2.58729
78	ENSG00000261056	0	7.97907	-6.30953	2.15279	-2.93086	0.00338027	0.943439	17.0063	8.20458	14.6845	0	0
79	ENSG00000273007	0	7.7441	-6.26936	2.15872	-2.90421	0.00368183	0.943439	12.7547	11.2813	14.6845	0	0
80	ENSG00000278893	0	6.54481	6.46715	2.22287	2.90937	0.00362162	0.943439	0	0	0	16.3379	16.3862
81	ENSG00000000003	TSPAN6	13.65	0.383086	1.44576	0.264972	0.791031	0.975317	0	17.4347	18.8801	8.64945	23.2857
82	ENSG00000000419	DPM1	21.9527	-0.323543	1.13793	-0.284326	0.77616	0.975317	42.5158	4.10229	25.1734	8.64945	29.3227
83	ENSG00000000457	SCYL3	2.60032	-3.18219	2.92365	-1.08843	0.276405	0.975317	1.41719	5.12786	5.59409	0	0.862431
84	ENSG00000000460	C1orf112	1.81808	-4.19431	4.3001	-0.975397	0.329363	0.975317	0	0	9.0904	0	0
85	ENSG00000001036	FUCA2	42.6849	1.1677	0.836369	1.39615	0.162669	0.975317	9.92034	19.4859	55.2417	61.5072	67.2697
86	ENSG00000001084	GCLC	44.7137	0.885098	0.767628	1.15303	0.248898	0.975317	15.5891	56.4065	27.9705	61.5072	62.0951
87	ENSG00000001167	NFYA	13.9528	-0.82474	1.35636	-0.608052	0.543153	0.975317	15.5891	9.23015	25.8727	0.96105	18.1111
88	ENSG00000001460	STPG1	0.344973	2.22873	4.4526	0.500545	0.616691	0.975317	0	0	0	0	1.72486
89	ENSG00000001497	LAS1L	10.5084	3.05256	1.52771	1.99813	0.0457026	0.975317	0	2.05115	5.59409	17.2989	27.5978
90	ENSG00000001561	ENPP4	1.0091	1.77385	4.36683	0.406209	0.684589	0.975317	0	0	1.39852	1.9221	1.72486
91	ENSG00000001617	SEMA3F	95.4185	-0.651818	0.618374	-1.05408	0.291845	0.975317	185.652	97.4294	52.4446	76.884	64.6824
92	ENSG00000001629	ANKIB1	61.721	-0.318295	0.707023	-0.45019	0.652573	0.975317	93.5347	28.716	79.0165	37.481	69.857
93	ENSG00000001630	CYP51A1	0.139852	-1.09577	4.56092	-0.240253	0.810134	0.975317	0	0	0.699261	0	0
94	ENSG00000001631	KRIT1	30.1794	0.799002	0.886976	0.900816	0.367686	0.975317	25.5095	9.23015	34.9631	43.2473	37.947
95	ENSG00000002016	RAD52	4.56138	1.32393	2.72154	0.486464	0.626638	0.975317	0	0	8.39114	14.4158	0
96	ENSG00000002586	CD99	138.661	0.627926	0.52059	1.20618	0.227747	0.975317	114.793	122.043	104.889	98.0271	253.555
97	ENSG00000002745	WNT16	1.11882	-3.50197	4.45047	-0.786878	0.431353	0.975317	0	0	5.59409	0	0
98	ENSG00000002746	HECW1	17.3381	-3.11321	1.58336	-1.9662	0.049276	0.975317	35.4298	45.1252	0	0.96105	5.17459
99	ENSG00000002834	LASP1	42.1194	-0.280908	0.753534	-0.372787	0.709307	0.975317	42.5158	41.0229	52.4446	21.1431	53.4708
100	ENSG00000002933	TMEM176A	9.01556	1.46283	1.80678	0.809635	0.41815	0.975317	14.1719	2.05115	0	3.8442	25.0105
101	ENSG00000003096	KLHL13	0.410229	-2.04198	4.52287	-0.451479	0.651644	0.975317	0	2.05115	0	0	0
102	ENSG00000003137	CYP26B1	2.44276	-2.02975	3.47629	-0.583884	0.559299	0.975317	0	0	10.4889	0	1.72486
103	ENSG00000003393	ALS2	40.3631	-0.955587	0.872667	-1.09502	0.273508	0.975317	80.7799	20.5115	48.9483	40.3641	11.2116
104	ENSG00000003402	CFLAR	89.6697	0.479159	0.626442	0.764889	0.444337	0.975317	60.9393	39.9973	130.762	127.82	88.8304
105	ENSG00000003509	NDUFAF7	13.112	-1.28374	1.59498	-0.80486	0.420901	0.975317	0	43.0741	8.39114	2.88315	11.2116
106	ENSG00000003756	RBM5	73.1602	-0.686395	0.563291	-1.21854	0.223017	0.975317	90.7003	84.097	83.9114	51.8967	55.1956
107	ENSG00000003987	MTMR7	1.58968	-2.3726	4.19437	-0.565663	0.571623	0.975317	7.08596	0	0	0	0.862431
108	ENSG00000004142	POLDIP2	54.1029	1.08067	0.718359	1.50436	0.132488	0.975317	15.5891	39.9973	55.9409	70.1567	88.8304
109	ENSG00000004455	AK2	100.174	-0.277582	0.541093	-0.513003	0.607949	0.975317	109.124	112.813	101.393	57.663	119.878
110	ENSG00000004478	FKBP4	12.6796	0.933653	1.2306	0.758696	0.448034	0.975317	9.92034	8.20458	9.78966	9.6105	25.8729
111	ENSG00000004487	KDM1A	51.2049	0.196269	0.702092	0.279549	0.779824	0.975317	66.608	50.2531	28.6697	68.2346	42.2591
112	ENSG00000004534	RBM6	76.7595	0.182834	0.627324	0.291451	0.770707	0.975317	75.1112	43.0741	99.9944	109.56	56.058
113	ENSG00000004700	RECQL	21.4997	0.951534	0.994914	0.956397	0.338871	0.975317	7.08596	23.5882	16.083	28.8315	31.91
114	ENSG00000004766	VPS50	6.19193	2.47374	2.08231	1.18798	0.234841	0.975317	0	0	6.29335	13.4547	11.2116
115	ENSG00000004777	ARHGAP33	0.38442	2.37072	4.44107	0.533816	0.593469	0.975317	0	0	0	1.9221	0
116	ENSG00000004779	NDUFAB1	88.5824	0.997378	0.719432	1.38634	0.165643	0.975317	35.4298	23.5882	130.063	95.144	158.687
117	ENSG00000004799	PDK4	1.30528	-3.70507	4.40546	-0.841016	0.400339	0.975317	0	5.12786	1.39852	0	0
118	ENSG00000004864	SLC25A13	29.4675	0.301849	0.865991	0.348559	0.727421	0.975317	35.4298	13.3324	32.166	33.6368	32.7724
119	ENSG00000004866	ST7	5.55141	1.58787	1.99237	0.796977	0.425464	0.975317	2.83438	0	6.29335	13.4547	5.17459
120	ENSG00000004961	HCCS	16.7964	2.71387	1.39955	1.9391	0.0524887	0.975317	0	1.02557	13.9852	24.9873	43.984
121	ENSG00000005007	UPF1	74.9778	-0.511681	0.604735	-0.846125	0.397483	0.975317	110.541	83.0714	62.2343	42.2862	76.7564
122	ENSG00000005020	SKAP2	103.184	-0.623087	0.620263	-1.00455	0.315112	0.975317	89.2831	58.4576	211.876	69.1956	87.1056
123	ENSG00000005022	SLC25A5	9.77062	1.08663	1.71101	0.635083	0.525374	0.975317	2.83438	17.4347	0	9.6105	18.9735
124	ENSG00000005059	MCUB	13.7644	1.3392	1.40844	0.950838	0.341686	0.975317	0	18.4603	6.99261	19.221	24.1481
125	ENSG00000005073	HOXA11	107.241	-0.365577	0.490857	-0.744773	0.456409	0.975317	113.375	121.018	118.874	101.871	81.0686
126	ENSG00000005075	POLR2J	93.4052	-0.690829	0.643209	-1.07404	0.282806	0.975317	119.044	87.1737	124.469	25.9484	110.391
127	ENSG00000005100	DHX33	39.1632	0.831171	0.880016	0.944496	0.344916	0.975317	7.08596	28.716	53.1439	41.3252	65.5448
128	ENSG00000005108	THSD7A	1.49084	3.05325	4.14809	0.736062	0.461693	0.975317	1.41719	0	0	0	6.03702
129	ENSG00000005156	LIG3	36.6419	-0.188277	0.780796	-0.241135	0.80945	0.975317	35.4298	45.1252	34.9631	46.1304	21.5608
130	ENSG00000005175	RPAP3	62.7244	0.249229	0.696474	0.357844	0.72046	0.975317	28.3438	65.6367	80.4151	96.105	43.1216
131	ENSG00000005187	ACSM3	0.689945	3.22521	4.3909	0.734521	0.462631	0.975317	0	0	0	0	3.44973
132	ENSG00000005189	REXO5	3.07675	-4.95183	3.57006	-1.38705	0.165428	0.975317	0	0	15.3838	0	0
133	ENSG00000005206	SPPL2B	37.3629	-1.30417	2.19097	-0.59525	0.551676	0.975317	36.847	100.506	9.78966	0	39.6718
134	ENSG00000005238	FAM214B	132.749	-0.123451	0.49186	-0.250988	0.801823	0.975317	110.541	192.808	108.386	127.82	124.19
135	ENSG00000005243	COPZ2	107.504	0.221745	0.567999	0.390397	0.696243	0.975317	160.143	85.1225	58.0387	105.716	128.502
136	ENSG00000005249	PRKAR2B	104.609	0.646346	0.549595	1.17604	0.239579	0.975317	56.6877	69.7389	128.664	140.313	127.64
137	ENSG00000005339	CREBBP	281.818	-0.119821	0.435998	-0.274819	0.783455	0.975317	398.231	302.544	173.417	296.003	238.894
138	ENSG00000005436	GCFC2	11.1261	-1.23089	1.60825	-0.765358	0.444058	0.975317	0	19.4859	23.7749	2.88315	9.48675
139	ENSG00000005448	WDR54	39.1146	0.196403	0.782193	0.251093	0.801743	0.975317	36.847	23.5882	50.3468	27.8705	56.9205
140	ENSG00000005469	CROT	76.5747	-0.39953	0.668235	-0.597888	0.549915	0.975317	31.1782	97.4294	125.168	73.0398	56.058
141	ENSG00000005471	ABCB4	7.22787	-1.94845	2.20709	-0.882813	0.377337	0.975317	0	0	30.7675	1.9221	3.44973
142	ENSG00000005483	KMT2E	943.864	-0.620707	0.341002	-1.82025	0.0687217	0.975317	1333.58	1199.92	759.398	680.423	746.003
143	ENSG00000005486	RHBDD2	19.3674	-0.482913	1.02189	-0.472569	0.636521	0.975317	26.9266	18.4603	20.2786	9.6105	21.5608
144	ENSG00000005513	SOX8	0.419557	-2.12174	4.518	-0.46962	0.638627	0.975317	0	0	2.09778	0	0
145	ENSG00000005700	IBTK	112.632	-0.342851	0.542909	-0.631508	0.527709	0.975317	119.044	140.503	109.784	56.702	137.127
146	ENSG00000005801	ZNF195	10.1739	-1.01528	1.6768	-0.605486	0.544856	0.975317	1.41719	1.02557	35.6623	6.72735	6.03702
147	ENSG00000005810	MYCBP2	154.698	0.157223	0.453409	0.346757	0.728774	0.975317	164.394	159.989	119.574	194.132	135.402
148	ENSG00000005812	FBXL3	10.9343	-0.313141	1.30194	-0.240519	0.809928	0.975317	7.08596	12.3069	16.083	10.5716	8.62431
149	ENSG00000005882	PDK2	0.764524	-2.95423	4.4701	-0.660886	0.508685	0.975317	0	1.02557	2.79705	0	0
150	ENSG00000005884	ITGA3	206.685	-0.168468	0.433754	-0.388396	0.697723	0.975317	196.99	267.674	183.906	237.379	147.476
151	ENSG00000005889	ZFX	40.6234	-0.437724	0.800197	-0.54702	0.584365	0.975317	22.6751	41.0229	72.0239	43.2473	24.1481
152	ENSG00000005893	LAMP2	136.315	-0.418829	0.470208	-0.890732	0.373073	0.975317	172.897	137.427	144.747	89.3777	137.127
153	ENSG00000006007	GDE1	94.307	0.351644	0.521198	0.674685	0.499876	0.975317	68.0252	100.506	86.0092	114.365	102.629
154	ENSG00000006025	OSBPL7	42.174	-1.39411	0.844744	-1.65034	0.0988739	0.975317	62.3564	89.2248	16.7823	19.221	23.2857
155	ENSG00000006042	TMEM98	276.3	-0.605874	0.421917	-1.436	0.151002	0.975317	379.807	383.564	197.891	212.392	207.846
156	ENSG00000006062	MAP3K14	3.40126	-5.06503	3.49116	-1.45082	0.146831	0.975317	17.0063	0	0	0	0
157	ENSG00000006071	ABCC8	1.98407	-4.28552	4.1922	-1.02226	0.306657	0.975317	9.92034	0	0	0	0
158	ENSG00000006125	AP2B1	276.391	-0.252156	0.405448	-0.62192	0.533994	0.975317	347.212	322.03	217.47	203.743	291.502
159	ENSG00000006194	ZNF263	15.9604	0.441825	1.3831	0.319446	0.749388	0.975317	0	16.4092	25.1734	27.8705	10.3492
160	ENSG00000006283	CACNA1G	2.68333	-4.72828	3.36802	-1.40388	0.160356	0.975317	9.92034	0	3.49631	0	0
161	ENSG00000006327	TNFRSF12A	31.5266	2.03124	0.891238	2.27912	0.0226601	0.975317	7.08596	12.3069	22.3764	36.5199	79.3437
162	ENSG00000006432	MAP3K9	1.61511	-1.10276	4.05573	-0.271901	0.785698	0.975317	0	6.15344	0	1.9221	0
163	ENSG00000006451	RALA	455.448	0.26776	0.345853	0.7742	0.438813	0.975317	331.623	455.354	475.498	518.006	496.761
164	ENSG00000006459	KDM7A	17.137	0.335158	1.05856	0.316616	0.751535	0.975317	14.1719	11.2813	20.9778	21.1431	18.1111
165	ENSG00000006468	ETV1	22.1849	-1.36365	1.04322	-1.30716	0.191158	0.975317	21.2579	27.6905	39.1586	3.8442	18.9735
166	ENSG00000006576	PHTF2	171.271	-0.222085	0.425468	-0.521979	0.601685	0.975317	198.407	150.759	195.793	151.846	159.55
167	ENSG00000006606	CCL26	4.15085	-2.85444	2.60238	-1.09686	0.272704	0.975317	11.3375	0	7.69188	0	1.72486
168	ENSG00000006607	FARP2	37.4562	0.827721	0.780985	1.05984	0.289216	0.975317	34.0126	15.3836	36.3616	48.0525	53.4708
169	ENSG00000006625	GGCT	8.86384	0.921289	1.4607	0.630716	0.528226	0.975317	7.08596	4.10229	8.39114	5.7663	18.9735
170	ENSG00000006652	IFRD1	16.3583	-0.936709	1.09425	-0.856027	0.391983	0.975317	15.5891	20.5115	24.4741	13.4547	7.76188
171	ENSG00000006695	COX10	5.4249	-0.638131	2.06051	-0.309696	0.756792	0.975317	14.1719	0	4.89483	2.88315	5.17459
172	ENSG00000006704	GTF2IRD1	21.3745	-1.16503	1.12146	-1.03886	0.298872	0.975317	14.1719	49.2275	18.8801	21.1431	3.44973
173	ENSG00000006712	PAF1	55.7332	0.166267	0.642951	0.2586	0.795944	0.975317	62.3564	57.4321	39.8579	67.2735	51.7459
174	ENSG00000006715	VPS41	108.464	-0.287981	0.609815	-0.472243	0.636753	0.975317	72.2768	66.6622	211.177	91.2998	100.904
175	ENSG00000006744	ELAC2	63.5112	-0.267746	0.609143	-0.439545	0.660267	0.975317	60.9393	86.1481	57.3394	51.8967	61.2326
176	ENSG00000006756	ARSD	37.4709	0.355409	0.845512	0.420348	0.674232	0.975317	34.0126	12.3069	54.5424	52.8578	33.6348
177	ENSG00000006831	ADIPOR2	97.9005	0.512196	0.529204	0.967861	0.333114	0.975317	111.958	64.6111	74.821	126.859	111.254
178	ENSG00000006837	CDKL3	0.19221	1.35581	4.55186	0.297858	0.765812	0.975317	0	0	0	0.96105	0
179	ENSG00000007038	PRSS21	0.797163	1.28392	4.39085	0.292407	0.769976	0.975317	0	0	1.39852	0	2.58729
180	ENSG00000007062	PROM1	0.283438	-1.12159	4.56003	-0.245961	0.805712	0.975317	1.41719	0	0	0	0
181	ENSG00000007080	CCDC124	43.172	-0.349667	0.718397	-0.486732	0.626448	0.975317	36.847	63.5855	41.2564	33.6368	40.5343
182	ENSG00000007168	PAFAH1B1	518.706	-0.25511	0.421033	-0.605916	0.544571	0.975317	779.456	596.883	288.795	441.122	487.274
183	ENSG00000007202	KIAA0100	53.7188	1.0805	0.675952	1.59848	0.109936	0.975317	25.5095	54.3554	31.4668	70.1567	87.1056
184	ENSG00000007237	GAS7	1.23069	-3.61565	4.44723	-0.813012	0.416211	0.975317	0	6.15344	0	0	0
185	ENSG00000007312	CD79B	0.172486	1.27694	4.55777	0.280167	0.779349	0.975317	0	0	0	0	0.862431
186	ENSG00000007341	ST7L	7.09711	-1.95003	2.11171	-0.92344	0.355778	0.975317	18.4235	0	11.8874	0	5.17459
187	ENSG00000007376	RPUSD1	19.529	1.02148	1.30673	0.781713	0.434383	0.975317	21.2579	0	20.2786	17.2989	38.8094
188	ENSG00000007384	RHBDF1	128.414	-0.91369	0.485871	-1.88052	0.0600373	0.975317	201.241	155.887	117.476	85.5335	81.931
189	ENSG00000007402	CACNA2D2	0.139852	-1.09577	4.56092	-0.240253	0.810134	0.975317	0	0	0.699261	0	0
190	ENSG00000007520	TSR3	0.524272	1.41817	4.43986	0.319417	0.74941	0.975317	0	0	0.699261	1.9221	0
191	ENSG00000007541	PIGQ	10.3766	-0.556989	1.48447	-0.375211	0.707503	0.975317	12.7547	8.20458	14.6845	15.3768	0.862431
192	ENSG00000007545	CRAMP1	17.1958	-1.15052	1.09316	-1.05247	0.292585	0.975317	11.3375	24.6137	30.0682	9.6105	10.3492
193	ENSG00000007866	TEAD3	75.9072	1.24596	0.815412	1.52801	0.12651	0.975317	15.5891	18.4603	111.882	158.573	75.0315
194	ENSG00000007923	DNAJC11	13.5831	-0.350814	1.37512	-0.255115	0.798634	0.975317	15.5891	27.6905	1.39852	16.3379	6.89945
195	ENSG00000007968	E2F2	1.55238	4.393	4.3561	1.00847	0.313229	0.975317	0	0	0	0	7.76188
196	ENSG00000008018	PSMB1	96.5413	0.804376	0.600315	1.33992	0.18027	0.975317	45.3501	52.3042	124.469	110.521	150.063
197	ENSG00000008056	SYN1	0.344973	2.22873	4.4526	0.500545	0.616691	0.975317	0	0	0	0	1.72486
198	ENSG00000008083	JARID2	158.551	-0.811834	0.545564	-1.48806	0.136735	0.975317	297.61	111.787	165.725	70.1567	147.476
199	ENSG00000008086	CDKL5	20.8704	1.01986	0.978707	1.04205	0.297391	0.975317	14.1719	20.5115	9.78966	28.8315	31.0475
200	ENSG00000008118	CAMK1G	3.24455	-5.0224	3.12454	-1.60741	0.107965	0.975317	0	9.23015	6.99261	0	0
201	ENSG00000008256	CYTH3	101.725	-1.15732	0.564689	-2.04948	0.0404154	0.975317	93.5347	176.399	121.671	39.4031	77.6188
202	ENSG00000008282	SYPL1	114.103	-0.506422	0.617318	-0.820358	0.412012	0.975317	144.554	193.833	50.3468	65.3514	116.428
203	ENSG00000008283	CYB561	95.1695	-0.21542	0.559738	-0.384859	0.700342	0.975317	100.621	101.532	99.9944	121.092	52.6083
204	ENSG00000008294	SPAG9	248.506	0.59415	0.44061	1.34847	0.177506	0.975317	145.971	191.782	280.404	386.342	238.031
205	ENSG00000008324	SS18L2	12.8386	1.11151	1.35301	0.821512	0.411355	0.975317	1.41719	18.4603	6.29335	25.9484	12.074
206	ENSG00000008382	MPND	11.1537	-2.96637	1.54475	-1.92029	0.0548216	0.975317	24.0923	11.2813	16.083	0	4.31216
207	ENSG00000008394	MGST1	173.377	1.01191	0.462592	2.18748	0.0287077	0.975317	114.793	94.3527	160.131	193.171	304.438
208	ENSG00000008405	CRY1	43.7887	-0.673071	0.787195	-0.855024	0.392538	0.975317	53.8533	67.6878	32.8653	49.0136	15.5238
209	ENSG00000008441	NFIX	1065.05	-0.41519	0.359958	-1.15344	0.248729	0.975317	1624.1	1120.95	806.248	999.492	774.463
210	ENSG00000008513	ST3GAL1	143.432	0.531097	1.33839	0.396817	0.691502	0.975317	18.4235	47.1763	299.284	205.665	146.613
211	ENSG00000008517	IL32	2.36066	4.99601	3.30281	1.51265	0.130368	0.975317	0	0	0	5.7663	6.03702
212	ENSG00000008735	MAPK8IP2	0.344973	2.22873	4.4526	0.500545	0.616691	0.975317	0	0	0	0	1.72486
213	ENSG00000008838	MED24	76.4808	-1.35303	0.68199	-1.98395	0.0472619	0.975317	90.7003	50.2531	162.229	24.0263	55.1956
214	ENSG00000008853	RHOBTB2	14.3504	1.9159	1.51722	1.26277	0.20667	0.975317	0	1.02557	18.8801	34.5978	17.2486
215	ENSG00000008869	HEATR5B	6.94013	-1.53599	1.94013	-0.791696	0.428538	0.975317	22.6751	0	5.59409	3.8442	2.58729
216	ENSG00000008988	RPS20	1201.99	0.142009	0.362997	0.391212	0.69564	0.975317	759.615	1199.92	1502.01	1024.48	1523.92
217	ENSG00000009335	UBE3C	302.417	0.315876	0.422202	0.748162	0.454362	0.975317	171.48	283.058	370.609	382.498	304.438
218	ENSG00000009413	REV3L	117.209	-0.269791	0.48741	-0.553519	0.579908	0.975317	100.621	128.197	148.243	95.144	113.841
219	ENSG00000009765	IYD	1.89735	4.6824	4.08558	1.14608	0.251762	0.975317	0	0	0	0	9.48675
220	ENSG00000009830	POMT2	60.3042	-0.62321	0.682765	-0.912773	0.361362	0.975317	51.0189	105.634	53.8431	29.7926	61.2326
221	ENSG00000009954	BAZ1B	491.286	0.0937445	0.334208	0.280497	0.779096	0.975317	415.237	467.661	551.717	536.266	485.549
222	ENSG00000010017	RANBP9	10.4991	0.80072	1.63214	0.490596	0.623712	0.975317	18.4235	6.15344	0	11.5326	16.3862
223	ENSG00000010072	SPRTN	29.77	-1.74891	0.911309	-1.91911	0.0549699	0.975317	42.5158	63.5855	18.1808	12.4937	12.074
224	ENSG00000010165	METTL13	52.6129	0.572929	0.703729	0.814134	0.415568	0.975317	63.7736	37.9462	30.7675	87.4556	43.1216
225	ENSG00000010244	ZNF207	324.968	-0.621658	0.39106	-1.58967	0.111908	0.975317	454.919	416.383	262.922	259.484	231.132
226	ENSG00000010256	UQCRC1	222.738	0.357432	0.410642	0.870422	0.38407	0.975317	255.095	178.45	167.823	277.743	234.581
227	ENSG00000010278	CD9	10.7111	0.503346	1.44331	0.348745	0.727281	0.975317	1.41719	13.3324	12.5867	20.1821	6.03702
228	ENSG00000010292	NCAPD2	31.1571	-1.02887	0.87721	-1.17289	0.240839	0.975317	56.6877	26.6649	34.2638	10.5716	27.5978
229	ENSG00000010295	IFFO1	16.5709	-1.44132	1.08291	-1.33096	0.183202	0.975317	22.6751	23.5882	20.2786	7.6884	8.62431
230	ENSG00000010318	PHF7	2.11431	4.83527	3.91482	1.23512	0.216787	0.975317	0	0	0	10.5716	0
231	ENSG00000010322	NISCH	69.9404	-0.26257	0.599706	-0.437832	0.661508	0.975317	73.694	97.4294	53.8431	55.7409	68.9945
232	ENSG00000010404	IDS	7.69741	-0.60995	1.6163	-0.377375	0.705895	0.975317	1.41719	11.2813	13.9852	5.7663	6.03702
233	ENSG00000010539	ZNF200	5.7636	-1.46506	2.10624	-0.69558	0.486692	0.975317	5.66877	0	17.4815	4.80525	0.862431
234	ENSG00000010626	LRRC23	8.21442	1.71404	1.94531	0.881116	0.378255	0.975317	0	0	12.5867	8.64945	19.8359
235	ENSG00000010671	BTK	2.25626	-4.48982	3.98938	-1.12544	0.260401	0.975317	0	11.2813	0	0	0
236	ENSG00000010803	SCMH1	6.95049	-0.390651	1.57727	-0.247675	0.804386	0.975317	8.50315	6.15344	8.39114	4.80525	6.89945
237	ENSG00000010810	FYN	51.0289	0.640152	0.725834	0.881953	0.377802	0.975317	62.3564	24.6137	38.4594	87.4556	42.2591
238	ENSG00000010818	HIVEP2	36.0126	0.340359	0.791115	0.430227	0.66703	0.975317	18.4235	46.1508	32.8653	40.3641	42.2591
239	ENSG00000011007	ELOA	102.126	0.840385	0.524809	1.60131	0.109307	0.975317	106.289	65.6367	61.535	146.08	131.09
240	ENSG00000011009	LYPLA2	159.329	0.697814	0.431472	1.61729	0.105817	0.975317	116.21	119.992	146.146	213.353	200.947
241	ENSG00000011021	CLCN6	8.35	3.61294	1.88028	1.92149	0.0546697	0.975317	0	0	4.19557	29.7926	7.76188
242	ENSG00000011105	TSPAN9	176.325	-0.748171	0.560907	-1.33386	0.18225	0.975317	307.531	245.112	79.0165	149.924	100.042
243	ENSG00000011114	BTBD7	219.381	0.181318	0.494404	0.36674	0.713813	0.975317	123.296	225.626	274.81	324.835	148.338
244	ENSG00000011143	MKS1	2.14873	4.86086	3.44114	1.41257	0.157781	0.975317	0	0	0	3.8442	6.89945
245	ENSG00000011198	ABHD5	117.558	1.30347	0.581358	2.24212	0.0249537	0.975317	97.7862	30.7672	93.701	217.197	148.338
246	ENSG00000011201	ANOS1	10.6565	-0.461431	1.61905	-0.285001	0.775644	0.975317	11.3375	0	24.4741	10.5716	6.89945
247	ENSG00000011243	AKAP8L	33.3891	-0.472429	0.841878	-0.56116	0.574688	0.975317	39.6814	33.8439	39.1586	41.3252	12.9365
248	ENSG00000011258	MBTD1	7.58048	-1.71776	1.59948	-1.07395	0.282845	0.975317	18.4235	6.15344	6.99261	2.88315	3.44973
249	ENSG00000011260	UTP18	46.8828	0.658249	0.849106	0.775226	0.438206	0.975317	45.3501	7.17901	61.535	63.4293	56.9205
250	ENSG00000011275	RNF216	166.284	0.637723	0.486744	1.31018	0.190134	0.975317	82.1971	159.989	165.026	259.484	164.724
251	ENSG00000011304	PTBP1	494.919	0.333307	0.350578	0.950736	0.341739	0.975317	444.998	345.618	553.815	558.37	571.792
252	ENSG00000011332	DPF1	25.87	-2.13253	1.15443	-1.84726	0.06471	0.975317	90.7003	11.2813	10.4889	4.80525	12.074
253	ENSG00000011376	LARS2	16.1768	-0.364748	1.1291	-0.323043	0.746663	0.975317	8.50315	19.4859	25.1734	9.6105	18.1111
254	ENSG00000011405	PIK3C2A	182.934	-0.508365	0.414198	-1.22735	0.219692	0.975317	196.99	217.421	208.38	129.742	162.137
255	ENSG00000011422	PLAUR	60.1908	2.10671	0.933991	2.2556	0.0240957	0.975317	4.25158	12.3069	60.1365	42.2862	181.973
256	ENSG00000011451	WIZ	130.375	-0.699148	0.524196	-1.33375	0.182285	0.975317	188.487	188.705	85.3099	105.716	83.6559
257	ENSG00000011454	RABGAP1	128.156	-0.363691	0.482434	-0.753867	0.450929	0.975317	171.48	102.557	148.243	103.793	114.703
258	ENSG00000011465	DCN	295.895	0.129084	0.451654	0.285804	0.775028	0.975317	386.893	315.876	153.838	363.277	259.592
259	ENSG00000011478	QPCTL	0.139852	-1.09577	4.56092	-0.240253	0.810134	0.975317	0	0	0.699261	0	0
260	ENSG00000011485	PPP5C	9.50284	0.469274	1.92301	0.244031	0.807207	0.975317	0	0	24.4741	14.4158	8.62431
261	ENSG00000011523	CEP68	25.0689	0.45081	0.970182	0.464665	0.642171	0.975317	38.2642	14.358	13.286	41.3252	18.1111
262	ENSG00000011590	ZBTB32	1.02557	-3.35279	4.45511	-0.752572	0.451707	0.975317	0	5.12786	0	0	0
263	ENSG00000011638	LDAF1	11.2112	1.51572	1.47815	1.02542	0.305165	0.975317	0	9.23015	9.78966	16.3379	20.6984
264	ENSG00000011677	GABRA3	6.60205	1.29881	2.14792	0.604685	0.545388	0.975317	12.7547	0	0	12.4937	7.76188
265	ENSG00000012048	BRCA1	75.2475	0.233015	0.625671	0.372425	0.709577	0.975317	46.7673	50.2531	113.28	87.4556	78.4813
266	ENSG00000012061	ERCC1	19.1089	0.392674	1.01838	0.385585	0.699804	0.975317	17.0063	14.358	19.5793	14.4158	30.1851
267	ENSG00000012124	CD22	2.67401	-0.906666	3.34645	-0.270933	0.786442	0.975317	9.92034	0	0	0	3.44973
268	ENSG00000012171	SEMA3B	27.4213	-1.46577	1.07739	-1.36048	0.173677	0.975317	51.0189	53.3298	6.29335	5.7663	20.6984
269	ENSG00000012174	MBTPS2	27.7668	-0.516519	0.866311	-0.596228	0.551023	0.975317	24.0923	36.9206	33.5645	27.8705	16.3862
270	ENSG00000012211	PRICKLE3	1.11882	-3.50197	4.45047	-0.786878	0.431353	0.975317	0	0	5.59409	0	0
271	ENSG00000012232	EXTL3	31.1468	0.414421	0.885081	0.46823	0.63962	0.975317	11.3375	26.6649	44.0535	28.8315	44.8464
272	ENSG00000012504	NR1H4	2.42986	-2.97363	3.2736	-0.908368	0.363684	0.975317	7.08596	4.10229	0	0.96105	0
273	ENSG00000012660	ELOVL5	35.6252	0.636208	0.812438	0.783085	0.433577	0.975317	38.2642	32.8183	16.7823	30.7536	59.5078
274	ENSG00000012822	CALCOCO1	13.9687	-1.9082	1.5472	-1.23332	0.217455	0.975317	0	36.9206	22.3764	1.9221	8.62431
275	ENSG00000012963	UBR7	35.3122	0.984507	0.934518	1.05349	0.292116	0.975317	17.0063	6.15344	52.4446	50.9357	50.021
276	ENSG00000012983	MAP4K5	311.65	-0.635935	0.415189	-1.53168	0.125603	0.975317	416.654	451.252	223.064	242.185	225.095
277	ENSG00000013016	EHD3	16.3125	-1.0783	1.14143	-0.944693	0.344816	0.975317	9.92034	20.5115	31.4668	6.72735	12.9365
278	ENSG00000013275	PSMC4	137.064	0.232467	0.521905	0.44542	0.656016	0.975317	89.2831	130.248	164.326	97.0661	204.396
279	ENSG00000013288	MAN2B2	24.3744	1.60467	0.975242	1.6454	0.0998869	0.975317	18.4235	5.12786	16.7823	29.7926	51.7459
280	ENSG00000013306	SLC25A39	129.706	0.271559	0.507972	0.534594	0.592931	0.975317	167.229	79.9947	112.581	166.262	122.465
281	ENSG00000013364	MVP	132.16	-0.439493	0.495959	-0.886147	0.375538	0.975317	96.3691	153.836	192.297	101.871	116.428
282	ENSG00000013374	NUB1	145.015	-0.182931	0.443635	-0.412347	0.680085	0.975317	154.474	166.143	136.356	124.937	143.164
283	ENSG00000013441	CLK1	35.9897	-0.351996	0.805542	-0.436968	0.662135	0.975317	60.9393	24.6137	32.8653	36.5199	25.0105
284	ENSG00000013503	POLR3B	21.7823	0.673817	1.00492	0.67052	0.502526	0.975317	24.0923	9.23015	19.5793	16.3379	39.6718
285	ENSG00000013523	ANGEL1	2.88094	-2.28205	2.98308	-0.764997	0.444273	0.975317	0	11.2813	1.39852	0	1.72486
286	ENSG00000013573	DDX11	12.7589	1.44386	1.78381	0.809422	0.418272	0.975317	0	11.2813	11.1882	41.3252	0
287	ENSG00000013583	HEBP1	38.159	1.64955	0.893034	1.84713	0.0647277	0.975317	5.66877	15.3836	39.8579	47.0915	82.7934
288	ENSG00000013588	GPRC5A	105.571	-0.52274	0.559569	-0.934185	0.350209	0.975317	136.05	122.043	102.791	47.0915	119.878
289	ENSG00000013619	MAMLD1	7.76742	-2.39714	1.74733	-1.37189	0.170098	0.975317	12.7547	11.2813	10.4889	0	4.31216
290	ENSG00000013810	TACC3	38.8408	0.76413	0.814679	0.937952	0.348269	0.975317	11.3375	35.895	43.3542	43.2473	60.3702
291	ENSG00000014123	UFL1	73.7311	-0.958576	0.721369	-1.32883	0.183904	0.975317	143.136	91.276	40.5572	22.1042	71.5818
292	ENSG00000014164	ZC3H3	3.75736	-5.24007	3.00362	-1.74459	0.0810571	0.975317	0	4.10229	14.6845	0	0
293	ENSG00000014216	CAPN1	15.2531	0.736574	1.16317	0.633248	0.526572	0.975317	18.4235	10.2557	7.69188	10.5716	29.3227
294	ENSG00000014641	MDH1	55.9868	0.506473	0.681108	0.743601	0.457118	0.975317	32.5954	56.4065	54.5424	43.2473	93.1426
295	ENSG00000014824	SLC30A9	39.8129	-0.48608	0.832961	-0.583557	0.559518	0.975317	15.5891	55.3809	63.6328	23.0652	41.3967
296	ENSG00000014914	MTMR11	1.62231	-3.99324	4.10728	-0.972233	0.330935	0.975317	7.08596	1.02557	0	0	0
297	ENSG00000014919	COX15	40.8556	-0.518622	0.75102	-0.690556	0.489844	0.975317	28.3438	60.5088	50.3468	37.481	27.5978
298	ENSG00000015133	CCDC88C	13.4997	0.480891	1.76333	0.272717	0.785071	0.975317	0	21.537	13.286	32.6757	0
299	ENSG00000015153	YAF2	128.499	-0.517364	0.509953	-1.01453	0.310329	0.975317	192.738	155.887	90.2047	110.521	93.1426
300	ENSG00000015285	WAS	0.172486	1.27694	4.55777	0.280167	0.779349	0.975317	0	0	0	0	0.862431
301	ENSG00000015413	DPEP1	0.172486	1.27694	4.55777	0.280167	0.779349	0.975317	0	0	0	0	0.862431
302	ENSG00000015532	XYLT2	49.5667	-0.300526	0.695379	-0.432176	0.665613	0.975317	49.6017	70.7645	40.5572	31.7147	55.1956
303	ENSG00000015676	NUDCD3	108.529	-0.606227	0.531253	-1.14113	0.253818	0.975317	103.455	146.657	127.266	55.7409	109.529
304	ENSG00000016082	ISL1	8.62482	2.29238	1.72426	1.32948	0.183688	0.975317	1.41719	0	8.39114	22.1042	11.2116
305	ENSG00000016391	CHDH	0.19221	1.35581	4.55186	0.297858	0.765812	0.975317	0	0	0	0.96105	0
306	ENSG00000016402	IL20RA	0.139852	-1.09577	4.56092	-0.240253	0.810134	0.975317	0	0	0.699261	0	0
307	ENSG00000016864	GLT8D1	15.1948	0.503514	1.1391	0.44203	0.658468	0.975317	19.8407	8.20458	11.1882	13.4547	23.2857
308	ENSG00000017260	ATP2C1	42.6211	-0.834368	0.832986	-1.00166	0.316508	0.975317	39.6814	70.7645	44.7527	9.6105	48.2962
309	ENSG00000017427	IGF1	0.38442	2.37072	4.44107	0.533816	0.593469	0.975317	0	0	0	1.9221	0
310	ENSG00000017483	SLC38A5	26.9696	-0.46689	0.883301	-0.528574	0.597101	0.975317	36.847	27.6905	26.5719	14.4158	29.3227
311	ENSG00000017797	RALBP1	157.145	0.322655	0.435	0.741735	0.458248	0.975317	158.725	125.12	144.747	194.132	163
312	ENSG00000018189	RUFY3	58.8559	0.4152	0.731116	0.5679	0.570103	0.975317	38.2642	22.5626	94.4003	69.1956	69.857
313	ENSG00000018280	SLC11A1	2.78773	-1.03622	3.26362	-0.317507	0.750859	0.975317	0	0	10.4889	0	3.44973
314	ENSG00000018408	WWTR1	161.982	0.98441	0.455299	2.16212	0.0306092	0.975317	102.038	118.966	127.965	172.028	288.915
315	ENSG00000018510	AGPS	32.5866	-0.189019	0.784656	-0.240894	0.809637	0.975317	36.847	33.8439	32.166	30.7536	29.3227
316	ENSG00000018610	STEEP1	24.8104	1.67082	0.986894	1.69301	0.0904535	0.975317	11.3375	14.358	13.9852	15.3768	68.9945
317	ENSG00000018699	TTC27	14.9058	-1.31456	1.49755	-0.877804	0.38005	0.975317	41.0986	1.02557	16.7823	0.96105	14.6613
318	ENSG00000018869	ZNF582	0.139852	-1.09577	4.56092	-0.240253	0.810134	0.975317	0	0	0.699261	0	0
319	ENSG00000019144	PHLDB1	31.3081	-0.492083	0.955607	-0.514943	0.606593	0.975317	18.4235	13.3324	74.1217	23.0652	27.5978
320	ENSG00000019186	CYP24A1	0.19221	1.35581	4.55186	0.297858	0.765812	0.975317	0	0	0	0.96105	0
321	ENSG00000019485	PRDM11	10.9551	-0.353317	1.32101	-0.267461	0.789114	0.975317	17.0063	7.17901	11.8874	5.7663	12.9365
322	ENSG00000019582	CD74	1.41719	-3.79604	4.44258	-0.854466	0.392847	0.975317	7.08596	0	0	0	0
323	ENSG00000019991	HGF	64.2574	-0.588963	0.647026	-0.910262	0.362684	0.975317	63.7736	72.8157	86.0092	28.8315	69.857
324	ENSG00000019995	ZRANB1	21.7503	-2.29456	1.07853	-2.12748	0.0333799	0.975317	52.4361	30.7672	12.5867	8.64945	4.31216
325	ENSG00000020129	NCDN	358.787	-0.923114	0.408594	-2.25924	0.0238683	0.975317	405.317	377.411	544.025	308.497	158.687
326	ENSG00000020181	ADGRA2	3.96814	-5.28804	3.33063	-1.5877	0.112354	0.975317	19.8407	0	0	0	0
327	ENSG00000020426	MNAT1	73.0592	-0.230888	0.685243	-0.336943	0.73616	0.975317	26.9266	118.966	86.7084	57.663	75.0315
328	ENSG00000020577	SAMD4A	83.3742	-0.394943	0.60135	-0.656761	0.511335	0.975317	119.044	109.736	48.249	76.884	62.9575
329	ENSG00000020633	RUNX3	20.6527	-1.08225	1.0016	-1.08052	0.279911	0.975317	28.3438	34.8695	15.3838	13.4547	11.2116
330	ENSG00000020922	MRE11	40.7166	0.251268	0.725565	0.346307	0.729112	0.975317	31.1782	33.8439	48.249	48.0525	42.2591
331	ENSG00000021355	SERPINB1	16.932	1.11221	1.1132	0.999112	0.31774	0.975317	4.25158	13.3324	16.7823	27.8705	22.4232
332	ENSG00000021574	SPAST	12.2719	1.31938	1.44488	0.913139	0.361169	0.975317	0	12.3069	10.4889	14.4158	24.1481
333	ENSG00000021762	OSBPL5	63.5712	1.00565	0.770638	1.30495	0.191909	0.975317	11.3375	36.9206	86.7084	84.5724	98.3172
334	ENSG00000021776	AQR	45.5855	0.858082	0.691444	1.241	0.214606	0.975317	29.761	36.9206	36.3616	74.0009	50.8835
335	ENSG00000021826	CPS1	5.68856	-1.81173	1.85427	-0.977061	0.328539	0.975317	8.50315	13.3324	2.09778	1.9221	2.58729
336	ENSG00000022267	FHL1	63.462	0.268295	0.646993	0.41468	0.678376	0.975317	35.4298	85.1225	55.2417	59.5851	81.931
337	ENSG00000022277	RTF2	228.88	1.23498	0.602216	2.05073	0.0402935	0.975317	39.6814	127.171	276.908	415.174	285.465
338	ENSG00000022556	NLRP2	1.70063	-4.06265	4.43668	-0.915695	0.359827	0.975317	8.50315	0	0	0	0
339	ENSG00000022567	SLC45A4	3.49061	2.16636	2.65558	0.815778	0.414627	0.975317	0	0	4.19557	11.5326	1.72486
340	ENSG00000022840	RNF10	289.743	-0.751071	0.428041	-1.75467	0.0793157	0.975317	429.409	396.897	211.876	235.457	175.074
341	ENSG00000022976	ZNF839	18.0172	1.08601	1.31456	0.826139	0.408725	0.975317	18.4235	0	18.8801	26.9094	25.8729
342	ENSG00000023041	ZDHHC6	42.8378	-0.387933	0.803346	-0.482896	0.629169	0.975317	53.8533	19.4859	68.5276	24.0263	48.2962
343	ENSG00000023171	GRAMD1B	4.02956	0.550529	2.22884	0.247002	0.804906	0.975317	0	3.07672	6.99261	5.7663	4.31216
344	ENSG00000023228	NDUFS1	63.3946	0.311481	0.628894	0.495284	0.6204	0.975317	65.1908	36.9206	71.3247	62.4683	81.0686
345	ENSG00000023287	RB1CC1	262.21	-0.192538	0.374009	-0.514795	0.606697	0.975317	243.757	301.518	282.502	238.34	244.931
346	ENSG00000023330	ALAS1	23.4105	-0.375773	0.953016	-0.394299	0.69336	0.975317	36.847	15.3836	25.1734	24.9873	14.6613
347	ENSG00000023445	BIRC3	28.6074	0.363168	0.866066	0.419331	0.674974	0.975317	24.0923	36.9206	16.083	37.481	28.4602
348	ENSG00000023516	AKAP11	65.0013	0.431296	0.597539	0.721787	0.470425	0.975317	49.6017	60.5088	60.8357	89.3777	64.6824
349	ENSG00000023572	GLRX2	34.0817	0.408901	0.828648	0.493456	0.62169	0.975317	19.8407	50.2531	20.2786	40.3641	39.6718
350	ENSG00000023608	SNAPC1	65.59	0.935017	0.656309	1.42466	0.154255	0.975317	51.0189	32.8183	60.1365	128.781	55.1956
351	ENSG00000023734	STRAP	162.265	0.555939	0.52517	1.05859	0.289787	0.975317	96.3691	116.915	195.793	121.092	281.153
352	ENSG00000023892	DEF6	4.25158	-5.38787	3.26387	-1.65076	0.0987875	0.975317	21.2579	0	0	0	0
353	ENSG00000023909	GCLM	335.104	0.153316	0.48651	0.315134	0.75266	0.975317	168.646	234.856	557.311	375.771	338.936
354	ENSG00000024048	UBR2	105.936	-0.350185	0.583398	-0.60025	0.548339	0.975317	93.5347	190.757	63.6328	90.3387	91.4177
355	ENSG00000024422	EHD2	361.03	0.497426	0.365418	1.36125	0.173434	0.975317	246.591	307.672	374.804	410.368	465.713
356	ENSG00000024526	DEPDC1	22.1727	1.13983	1.25574	0.907696	0.364039	0.975317	29.761	0	15.3838	26.9094	38.8094
357	ENSG00000024862	CCDC28A	14.9105	0.399467	1.38431	0.288568	0.772912	0.975317	0	18.4603	20.9778	14.4158	20.6984
358	ENSG00000025039	RRAGD	7.41985	-0.920859	1.91986	-0.47965	0.631476	0.975317	18.4235	0	9.0904	0.96105	8.62431
359	ENSG00000025156	HSF2	12.8044	0.351132	1.25206	0.280443	0.779138	0.975317	9.92034	18.4603	6.29335	8.64945	20.6984
360	ENSG00000025293	PHF20	142.077	-0.592669	0.46619	-1.2713	0.203621	0.975317	182.818	176.399	133.559	128.781	88.8304
361	ENSG00000025434	NR1H3	14.528	1.05677	1.25641	0.841101	0.400291	0.975317	1.41719	13.3324	15.3838	19.221	23.2857
362	ENSG00000025708	TYMP	8.3544	0.542173	1.63011	0.332598	0.739437	0.975317	1.41719	2.05115	17.4815	9.6105	11.2116
363	ENSG00000025770	NCAPH2	188.476	-0.694418	0.519193	-1.33749	0.181061	0.975317	325.954	203.063	139.153	83.6114	190.597
364	ENSG00000025772	TOMM34	87.8257	0.546881	0.541222	1.01046	0.312277	0.975317	63.7736	64.6111	93.701	98.0271	119.016
365	ENSG00000025796	SEC63	293.862	0.371885	0.392044	0.948579	0.342835	0.975317	199.824	288.186	299.983	394.992	286.327
366	ENSG00000025800	KPNA6	254.006	-0.129273	0.376766	-0.343112	0.731514	0.975317	257.929	237.933	292.991	243.146	238.031
367	ENSG00000026025	VIM	4362.78	0.11561	0.292224	0.395621	0.692385	0.975317	4492.5	4585.34	3588.61	3896.1	5251.35
368	ENSG00000026103	FAS	24.0564	-0.468886	1.09777	-0.427124	0.669289	0.975317	26.9266	5.12786	48.9483	29.7926	9.48675
369	ENSG00000026297	RNASET2	18.5553	0.349992	1.05124	0.332933	0.739185	0.975317	14.1719	9.23015	26.5719	22.1042	20.6984
370	ENSG00000026559	KCNG1	15.5527	1.37131	1.17211	1.16995	0.242022	0.975317	17.0063	4.10229	7.69188	31.7147	17.2486
371	ENSG00000026652	AGPAT4	6.75201	-0.673799	1.90245	-0.354175	0.723208	0.975317	0	4.10229	19.5793	5.7663	4.31216
372	ENSG00000026950	BTN3A1	8.43422	-1.53134	1.57462	-0.972511	0.330796	0.975317	14.1719	6.15344	13.9852	0.96105	6.89945
373	ENSG00000027697	IFNGR1	1.25867	-3.66929	4.44579	-0.825342	0.409178	0.975317	0	0	6.29335	0	0
374	ENSG00000028137	TNFRSF1B	29.4903	0.249558	0.986257	0.253035	0.800241	0.975317	7.08596	44.0996	30.7675	49.9746	15.5238
375	ENSG00000028277	POU2F2	260.604	0.88437	0.518334	1.70618	0.087975	0.975317	94.9519	145.631	341.939	423.823	296.676
376	ENSG00000028310	BRD9	402.396	-0.192144	0.353329	-0.54381	0.586572	0.975317	491.766	440.996	338.443	377.693	363.084
377	ENSG00000028528	SNX1	49.471	0.934046	0.751593	1.24275	0.213958	0.975317	26.9266	22.5626	58.738	95.144	43.984
378	ENSG00000028839	TBPL1	9.25307	1.95438	1.72052	1.13593	0.255987	0.975317	1.41719	0	11.1882	8.64945	25.0105
379	ENSG00000029153	ARNTL2	39.216	1.18997	0.811933	1.4656	0.142757	0.975317	28.3438	21.537	27.9705	25.9484	92.2802
380	ENSG00000029363	BCLAF1	205.42	0.346219	0.424598	0.815403	0.414842	0.975317	225.334	132.299	198.59	226.808	244.068
381	ENSG00000029364	SLC39A9	13.0089	-0.564986	1.26586	-0.446325	0.655362	0.975317	28.3438	6.15344	10.4889	10.5716	9.48675
382	ENSG00000029534	ANK1	3.42081	1.51634	2.49356	0.608105	0.543118	0.975317	1.41719	3.07672	1.39852	0	11.2116
383	ENSG00000029639	TFB1M	27.5778	0.881689	1.01689	0.867041	0.385919	0.975317	2.83438	32.8183	25.8727	29.7926	46.5713
384	ENSG00000029725	RABEP1	256.603	-0.446663	0.381914	-1.16954	0.242187	0.975317	290.524	277.93	292.991	242.185	179.386
385	ENSG00000030066	NUP160	6.3661	0.508967	1.94727	0.261375	0.793803	0.975317	2.83438	7.17901	6.29335	0	15.5238
386	ENSG00000030110	BAK1	18.313	1.43839	1.18392	1.21494	0.22439	0.975317	4.25158	4.10229	23.7749	41.3252	18.1111
387	ENSG00000030304	MUSK	5.38074	-0.943507	2.21702	-0.425575	0.670417	0.975317	0	1.02557	18.8801	0.96105	6.03702
388	ENSG00000030419	IKZF2	10.8327	-0.418705	1.44175	-0.290415	0.771499	0.975317	15.5891	5.12786	15.3838	16.3379	1.72486
389	ENSG00000030582	GRN	370.245	-0.259842	0.361512	-0.718765	0.472286	0.975317	413.82	420.485	355.225	271.016	390.681
390	ENSG00000031003	FAM13B	51.8009	0.349464	0.819637	0.426364	0.669842	0.975317	46.7673	56.4065	37.0609	14.4158	104.354
391	ENSG00000031081	ARHGAP31	75.3427	-0.338798	0.635674	-0.532975	0.594051	0.975317	39.6814	106.66	99.9944	51.8967	78.4813
392	ENSG00000031691	CENPQ	13.2307	-0.473251	1.40979	-0.335689	0.737105	0.975317	19.8407	1.02557	23.7749	16.3379	5.17459
393	ENSG00000032219	ARID4A	105.458	-0.410073	0.510807	-0.802796	0.422093	0.975317	100.621	138.452	111.882	104.754	71.5818
394	ENSG00000032389	EIPR1	12.0948	1.35706	1.55038	0.875314	0.381403	0.975317	17.0063	0	5.59409	7.6884	30.1851
395	ENSG00000033011	ALG1	5.56154	-1.07104	2.04166	-0.524591	0.599868	0.975317	4.25158	13.3324	3.49631	6.72735	0
396	ENSG00000033030	ZCCHC8	25.9735	-0.588156	0.915155	-0.642684	0.520429	0.975317	41.0986	15.3836	33.5645	18.26	21.5608
397	ENSG00000033100	CHPF2	7.17198	2.39955	1.76366	1.36055	0.173656	0.975317	0	2.05115	5.59409	14.4158	13.7989
398	ENSG00000033122	LRRC7	0.850315	-3.04507	4.46632	-0.681786	0.495375	0.975317	4.25158	0	0	0	0
399	ENSG00000033170	FUT8	28.4606	0.548365	0.882923	0.621079	0.534548	0.975317	32.5954	12.3069	27.2712	27.8705	42.2591
400	ENSG00000033178	UBA6	137.686	-0.16518	0.557299	-0.296394	0.766929	0.975317	106.289	79.9947	244.741	138.391	119.016
401	ENSG00000033327	GAB2	55.6536	0.435997	0.659747	0.660854	0.508706	0.975317	69.4424	43.0741	34.2638	71.1177	60.3702
402	ENSG00000033800	PIAS1	27.246	-0.405467	0.927565	-0.43713	0.662017	0.975317	12.7547	30.7672	46.8505	18.26	27.5978
403	ENSG00000033867	SLC4A7	582.326	-0.345538	0.320901	-1.07677	0.281582	0.975317	697.258	660.469	552.417	497.824	503.66
404	ENSG00000034053	APBA2	5.99541	1.88757	2.13547	0.883914	0.376743	0.975317	0	0	8.39114	8.64945	12.9365
405	ENSG00000034152	MAP2K3	120.865	0.906885	0.530052	1.71093	0.0870932	0.975317	48.1845	118.966	100.694	177.794	158.687
406	ENSG00000034533	ASTE1	6.24465	0.605284	1.9007	0.318453	0.750141	0.975317	7.08596	0	8.39114	10.5716	5.17459
407	ENSG00000034693	PEX3	14.6629	-0.48126	1.18365	-0.406591	0.684309	0.975317	29.761	10.2557	9.78966	10.5716	12.9365
408	ENSG00000035115	SH3YL1	3.99013	2.13237	2.48643	0.8576	0.391113	0.975317	0	0	4.89483	3.8442	11.2116
409	ENSG00000035141	FAM136A	63.2298	-0.374744	0.739819	-0.506535	0.612481	0.975317	19.8407	77.9435	110.483	59.5851	48.2962
410	ENSG00000035664	DAPK2	10.1407	1.20349	1.42581	0.844076	0.398627	0.975317	5.66877	12.3069	2.09778	21.1431	9.48675
411	ENSG00000035681	NSMAF	9.34888	0.492249	1.59388	0.308836	0.757446	0.975317	12.7547	3.07672	8.39114	0.96105	21.5608
412	ENSG00000035687	ADSS2	77.7553	0.384166	0.561518	0.684157	0.493876	0.975317	72.2768	61.5344	74.1217	73.0398	107.804
413	ENSG00000035862	TIMP2	1718.34	-0.363944	0.322518	-1.12844	0.259132	0.975317	2215.07	2119.86	1325.8	1466.56	1464.41
414	ENSG00000035928	RFC1	104.764	0.466491	0.562809	0.828863	0.407182	0.975317	46.7673	96.4038	128.664	119.17	132.814
415	ENSG00000036054	TBC1D23	37.3912	-0.315962	0.754734	-0.41864	0.675479	0.975317	51.0189	35.895	34.9631	37.481	27.5978
416	ENSG00000036448	MYOM2	1.65959	2.68939	3.95506	0.679988	0.496512	0.975317	0	0	1.39852	0	6.89945
417	ENSG00000036473	OTC	0.19221	1.35581	4.55186	0.297858	0.765812	0.975317	0	0	0	0.96105	0
418	ENSG00000036530	CYP46A1	1.70153	-2.52723	3.67676	-0.687351	0.491862	0.975317	0	2.05115	5.59409	0	0.862431
419	ENSG00000036549	ZZZ3	267.485	-0.311736	0.481316	-0.647675	0.517195	0.975317	470.508	170.245	230.057	277.743	188.872
420	ENSG00000036672	USP2	0.729393	3.30132	4.38769	0.752405	0.451808	0.975317	0	0	0	1.9221	1.72486
421	ENSG00000036828	CASR	3.59347	-3.57616	3.22383	-1.10929	0.267305	0.975317	17.0063	0	0	0.96105	0
422	ENSG00000037042	TUBG2	3.19799	2.35025	3.06047	0.767936	0.442525	0.975317	0	0	3.49631	12.4937	0
423	ENSG00000037474	NSUN2	17.8335	1.52724	1.22354	1.24821	0.211956	0.975317	24.0923	2.05115	4.89483	20.1821	37.947
424	ENSG00000037637	FBXO42	28.3894	-0.48711	0.838279	-0.581083	0.561184	0.975317	31.1782	32.8183	32.166	25.9484	19.8359
425	ENSG00000037757	MRI1	5.18923	-0.753516	2.08246	-0.361839	0.717472	0.975317	0	14.358	4.19557	4.80525	2.58729
426	ENSG00000038002	AGA	21.0587	-0.303445	1.00077	-0.303213	0.761727	0.975317	11.3375	33.8439	23.0756	16.3379	20.6984
427	ENSG00000038210	PI4K2B	9.37328	-0.504273	1.53987	-0.327478	0.743306	0.975317	19.8407	3.07672	9.0904	1.9221	12.9365
428	ENSG00000038219	BOD1L1	299.355	0.248394	0.420097	0.591278	0.554334	0.975317	327.371	176.399	331.45	387.303	274.253
429	ENSG00000038274	MAT2B	17.6491	-0.540889	1.06996	-0.505521	0.613193	0.975317	11.3375	24.6137	24.4741	10.5716	17.2486
430	ENSG00000038945	MSR1	0.139852	-1.09577	4.56092	-0.240253	0.810134	0.975317	0	0	0.699261	0	0
431	ENSG00000039068	CDH1	62.1752	-1.22096	0.654645	-1.86508	0.0621708	0.975317	62.3564	72.8157	106.288	46.1304	23.2857
432	ENSG00000039123	MTREX	202.92	-0.177198	0.409859	-0.432339	0.665495	0.975317	218.248	212.294	207.681	222.003	154.375
433	ENSG00000039319	ZFYVE16	53.7538	-0.478617	0.728234	-0.657229	0.511034	0.975317	66.608	45.1252	69.9261	67.2735	19.8359
434	ENSG00000040199	PHLPP2	5.35669	2.26636	2.00182	1.13215	0.257571	0.975317	2.83438	0	3.49631	14.4158	6.03702
435	ENSG00000040487	SLC66A1	13.624	2.22391	1.50521	1.47747	0.13955	0.975317	1.41719	0	14.6845	27.8705	24.1481
436	ENSG00000040531	CTNS	17.7186	1.11517	1.3305	0.838155	0.401944	0.975317	0	27.6905	8.39114	32.6757	19.8359
437	ENSG00000040608	RTN4R	1.72486	4.54491	4.24813	1.06986	0.284682	0.975317	0	0	0	0	8.62431
438	ENSG00000040633	PHF23	120.883	-0.341972	0.544461	-0.628093	0.529943	0.975317	198.407	115.89	82.5128	81.6893	125.915
439	ENSG00000041357	PSMA4	628.039	0.213552	0.342292	0.623889	0.5327	0.975317	573.963	459.457	737.022	733.281	636.474
440	ENSG00000041515	MYO16	0.139852	-1.09577	4.56092	-0.240253	0.810134	0.975317	0	0	0.699261	0	0
441	ENSG00000041880	PARP3	18.4764	1.22538	1.35304	0.905651	0.365121	0.975317	7.08596	0	28.6697	30.7536	25.8729
442	ENSG00000041988	THAP3	11.1707	-1.83078	1.48729	-1.23095	0.218341	0.975317	28.3438	4.10229	14.6845	0.96105	7.76188
443	ENSG00000042062	RIPOR3	23.967	0.508773	1.22678	0.414723	0.678345	0.975317	1.41719	7.17901	52.4446	18.26	40.5343
444	ENSG00000042088	TDP1	6.69167	1.07147	1.61737	0.662478	0.507665	0.975317	5.66877	4.10229	4.19557	13.4547	6.03702
445	ENSG00000042317	SPATA7	50.8268	-0.177143	0.700721	-0.252801	0.800422	0.975317	76.5284	52.3042	31.4668	40.3641	53.4708
446	ENSG00000042429	MED17	19.3578	-0.548036	1.12437	-0.487418	0.625962	0.975317	21.2579	27.6905	17.4815	26.9094	3.44973
447	ENSG00000042445	RETSAT	35.9909	1.08443	0.759891	1.42708	0.153556	0.975317	22.6751	26.6649	25.1734	44.2083	61.2326
448	ENSG00000042493	CAPG	270.218	-0.488693	0.427028	-1.14441	0.252455	0.975317	432.244	278.956	205.583	206.626	227.682
449	ENSG00000042753	AP2S1	600.225	-0.23511	0.327896	-0.717026	0.473358	0.975317	690.172	560.988	664.998	470.915	614.051
450	ENSG00000042832	TG	2.26751	-4.47861	3.99692	-1.12051	0.262494	0.975317	11.3375	0	0	0	0
451	ENSG00000043093	DCUN1D1	21.0256	1.14969	1.17271	0.980374	0.326902	0.975317	26.9266	1.02557	14.6845	37.481	25.0105
452	ENSG00000043514	TRIT1	9.33448	-0.615657	1.52408	-0.403952	0.686248	0.975317	22.6751	7.17901	2.79705	10.5716	3.44973
453	ENSG00000043591	ADRB1	7.13202	-2.50137	1.74525	-1.43325	0.151788	0.975317	19.8407	7.17901	4.89483	2.88315	0.862431
454	ENSG00000044115	CTNNA1	154.656	0.277493	0.43002	0.645301	0.518732	0.975317	150.222	138.452	139.153	164.34	181.111
455	ENSG00000044446	PHKA2	0.839114	-3.09451	4.46436	-0.69316	0.488209	0.975317	0	0	4.19557	0	0
456	ENSG00000044459	CNTLN	121.769	-0.300321	0.635378	-0.472664	0.636453	0.975317	249.426	59.4832	86.7084	136.469	76.7564
457	ENSG00000044524	EPHA3	3.34927	-2.38853	2.76966	-0.862392	0.388472	0.975317	0	9.23015	5.59409	1.9221	0
458	ENSG00000044574	HSPA5	1468.25	-0.444241	0.303105	-1.46564	0.142748	0.975317	1719.05	1827.57	1381.04	1063.88	1349.71
459	ENSG00000046604	DSG2	17.2619	0.995421	1.13921	0.873783	0.382236	0.975317	21.2579	4.10229	11.8874	32.6757	16.3862
460	ENSG00000046647	GEMIN8	11.7435	-1.23839	1.33315	-0.928921	0.35293	0.975317	8.50315	11.2813	25.8727	9.6105	3.44973
461	ENSG00000046651	OFD1	44.9509	0.21237	0.696957	0.30471	0.760587	0.975317	35.4298	45.1252	46.1513	39.4031	58.6453
462	ENSG00000046889	PREX2	0.139852	-1.09577	4.56092	-0.240253	0.810134	0.975317	0	0	0.699261	0	0
463	ENSG00000047056	WDR37	15.5939	0.644472	1.23436	0.522112	0.601593	0.975317	19.8407	14.358	4.19557	32.6757	6.89945
464	ENSG00000047188	YTHDC2	13.7069	-1.17916	1.22848	-0.959849	0.337131	0.975317	26.9266	7.17901	18.8801	8.64945	6.89945
465	ENSG00000047230	CTPS2	1.83301	-4.18333	3.8562	-1.08483	0.277996	0.975317	5.66877	0	3.49631	0	0
466	ENSG00000047249	ATP6V1H	112.758	-0.742012	0.582758	-1.27328	0.20292	0.975317	205.493	130.248	67.8284	98.9882	61.2326
467	ENSG00000047346	FAM214A	20.125	-0.799653	1.02087	-0.783308	0.433446	0.975317	32.5954	16.4092	23.7749	19.221	8.62431
468	ENSG00000047365	ARAP2	7.02261	-1.25788	1.82958	-0.687524	0.491752	0.975317	22.6751	2.05115	2.79705	6.72735	0.862431
469	ENSG00000047410	TPR	434.215	-0.647917	0.349554	-1.85356	0.0638026	0.975317	520.109	432.792	569.898	367.121	281.153
470	ENSG00000047457	CP	4.09019	1.34221	2.29984	0.583608	0.559484	0.975317	7.08596	0	0.699261	5.7663	6.89945
471	ENSG00000047579	DTNBP1	13.7734	-1.44673	1.23107	-1.17518	0.239923	0.975317	25.5095	21.537	8.39114	4.80525	8.62431
472	ENSG00000047621	C12orf4	42.3712	-0.183091	0.725093	-0.252507	0.800649	0.975317	59.5221	30.7672	43.3542	39.4031	38.8094
473	ENSG00000047634	SCML1	6.37837	1.21515	1.85602	0.654709	0.512655	0.975317	0	8.20458	4.19557	13.4547	6.03702
474	ENSG00000047648	ARHGAP6	13.0255	-1.74821	1.23019	-1.42108	0.155293	0.975317	19.8407	18.4603	16.083	3.8442	6.89945
475	ENSG00000047662	FAM184B	3.39751	1.85776	2.7406	0.677866	0.497857	0.975317	1.41719	0	3.49631	0	12.074
476	ENSG00000047849	MAP4	490.438	-0.295838	0.338861	-0.873036	0.382643	0.975317	494.6	633.804	460.813	450.732	412.242
477	ENSG00000047932	GOPC	133.942	-0.278481	0.460673	-0.604508	0.545506	0.975317	150.222	118.966	162.928	113.404	124.19
478	ENSG00000047936	ROS1	0.139852	-1.09577	4.56092	-0.240253	0.810134	0.975317	0	0	0.699261	0	0
479	ENSG00000048028	USP28	27.2146	0.415889	0.965147	0.430908	0.666535	0.975317	12.7547	11.2813	47.5498	31.7147	32.7724
480	ENSG00000048052	HDAC9	3.3156	0.997125	2.76344	0.360827	0.718229	0.975317	0	0	6.99261	0.96105	8.62431
481	ENSG00000048140	TSPAN17	64.953	-0.274669	0.818638	-0.335519	0.737234	0.975317	62.3564	28.716	118.175	16.3379	99.1796
482	ENSG00000048342	CC2D2A	41.9456	-1.9143	0.758413	-2.52408	0.0116001	0.975317	38.2642	74.8668	65.0313	13.4547	18.1111
483	ENSG00000048405	ZNF800	154.011	-0.132685	0.474092	-0.279872	0.779576	0.975317	150.222	119.992	208.38	117.248	174.211
484	ENSG00000048462	TNFRSF17	2.5686	-1.39509	3.39638	-0.410759	0.68125	0.975317	0	10.2557	0	0	2.58729
485	ENSG00000048471	SNX29	30.9961	-1.60706	1.06346	-1.51116	0.130747	0.975317	100.621	9.23015	17.4815	17.2989	10.3492
486	ENSG00000048540	LMO3	0.419557	-2.12174	4.518	-0.46962	0.638627	0.975317	0	0	2.09778	0	0
487	ENSG00000048544	MRPS10	262.093	0.421913	0.517936	0.814605	0.415299	0.975317	133.216	137.427	420.256	314.263	305.301
488	ENSG00000048649	RSF1	479.318	0.406165	0.361422	1.1238	0.2611	0.975317	444.998	407.152	420.256	710.216	413.967
489	ENSG00000048707	VPS13D	42.448	0.551972	0.782726	0.705193	0.48069	0.975317	38.2642	16.4092	52.4446	66.3125	38.8094
490	ENSG00000048740	CELF2	119.842	-0.926571	0.559161	-1.65707	0.0975046	0.975317	188.487	185.629	69.9261	74.9619	80.2061
491	ENSG00000048828	FAM120A	460.92	-0.0952823	0.36605	-0.260298	0.794634	0.975317	514.441	564.065	341.24	394.992	489.861
492	ENSG00000048991	R3HDM1	110.755	-0.303727	0.510762	-0.594655	0.552074	0.975317	138.885	136.401	84.6106	107.638	86.2431
493	ENSG00000049130	KITLG	56.7849	1.1087	0.65527	1.69198	0.0906507	0.975317	53.8533	26.6649	36.3616	73.0398	94.005
494	ENSG00000049239	H6PD	58.9115	1.03863	0.817423	1.27061	0.203866	0.975317	46.7673	14.358	62.9335	140.313	30.1851
495	ENSG00000049245	VAMP3	106.801	-0.294011	0.501189	-0.586626	0.557455	0.975317	131.799	117.941	96.4981	81.6893	106.079
496	ENSG00000049246	PER3	3.81937	-1.9121	2.62627	-0.728066	0.466573	0.975317	9.92034	0	6.29335	2.88315	0
497	ENSG00000049323	LTBP1	411.62	-0.240143	0.358004	-0.670783	0.502359	0.975317	525.778	342.541	447.527	392.108	350.147
498	ENSG00000049449	RCN1	48.6523	1.46149	0.766554	1.90657	0.0565765	0.975317	12.7547	22.5626	49.6476	63.4293	94.8675
499	ENSG00000049540	ELN	11.0341	0.473782	1.48381	0.3193	0.749499	0.975317	21.2579	2.05115	5.59409	3.8442	22.4232
500	ENSG00000049541	RFC2	10.293	0.513183	1.34953	0.380267	0.703747	0.975317	8.50315	12.3069	5.59409	17.2989	7.76188
501	ENSG00000049618	ARID1B	346.861	-0.72137	0.363602	-1.98396	0.0472608	0.975317	393.979	496.377	344.736	250.834	248.38
502	ENSG00000049656	CLPTM1L	39.176	0.278142	0.738431	0.376667	0.706421	0.975317	34.0126	28.716	45.452	39.4031	48.2962
503	ENSG00000049860	HEXB	24.0343	0.397706	1.2038	0.330376	0.741116	0.975317	18.4235	24.6137	20.9778	0.96105	55.1956
504	ENSG00000050130	JKAMP	3.86926	0.766736	2.56067	0.299428	0.764614	0.975317	0	4.10229	4.89483	0	10.3492
505	ENSG00000050165	DKK3	86.9584	0.652224	0.586171	1.11269	0.265843	0.975317	86.4487	81.0202	45.452	77.8451	144.026
506	ENSG00000050327	ARHGEF5	10.5567	-0.7764	1.61228	-0.481553	0.630124	0.975317	0	24.6137	13.286	10.5716	4.31216
507	ENSG00000050393	MCUR1	83.1407	0.490368	0.61441	0.798112	0.424806	0.975317	106.289	72.8157	36.3616	85.5335	114.703
508	ENSG00000050405	LIMA1	471.862	0.236104	0.332362	0.710382	0.477468	0.975317	444.998	436.894	439.835	454.577	583.004
509	ENSG00000050426	LETMD1	17.7871	-0.44998	1.04682	-0.429853	0.667302	0.975317	17.0063	15.3836	27.2712	16.3379	12.9365
510	ENSG00000050438	SLC4A8	16.2391	-2.00773	1.46167	-1.37359	0.169569	0.975317	49.6017	19.4859	0.699261	1.9221	9.48675
511	ENSG00000050555	LAMC3	1.17477	2.85636	4.36884	0.653804	0.513238	0.975317	0	0	0.699261	0	5.17459
512	ENSG00000050628	PTGER3	15.4652	0.756941	1.12675	0.671791	0.501717	0.975317	17.0063	6.15344	13.286	20.1821	20.6984
513	ENSG00000050730	TNIP3	2.71127	-4.75961	3.01783	-1.57716	0.114758	0.975317	2.83438	5.12786	5.59409	0	0
514	ENSG00000050748	MAPK9	16.462	-0.541038	1.38052	-0.391909	0.695126	0.975317	0	29.7416	26.5719	9.6105	16.3862
515	ENSG00000050820	BCAR1	37.2876	0.635265	0.797269	0.796801	0.425567	0.975317	17.0063	28.716	45.452	37.481	57.7829
516	ENSG00000051009	FHIP1B	9.04569	-1.48036	1.72707	-0.857148	0.391363	0.975317	18.4235	15.3836	2.79705	0	8.62431
517	ENSG00000051128	HOMER3	126.803	-0.183663	0.521112	-0.352443	0.724506	0.975317	85.0315	115.89	197.891	115.326	119.878
518	ENSG00000051180	RAD51	12.3964	1.66329	1.42672	1.16581	0.243692	0.975317	0	11.2813	8.39114	17.2989	25.0105
519	ENSG00000051341	POLQ	18.4686	-1.51629	1.07199	-1.41446	0.157226	0.975317	39.6814	16.4092	18.8801	9.6105	7.76188
520	ENSG00000051382	PIK3CB	22.4453	0.610227	1.24137	0.491578	0.623018	0.975317	0	37.9462	17.4815	24.0263	32.7724
521	ENSG00000051523	CYBA	13.5454	-0.986468	1.35543	-0.727788	0.466744	0.975317	1.41719	22.5626	26.5719	7.6884	9.48675
522	ENSG00000051596	THOC3	0.517459	2.81139	4.41159	0.637272	0.523948	0.975317	0	0	0	0	2.58729
523	ENSG00000051620	HEBP2	296.431	0.164068	0.416171	0.394233	0.693409	0.975317	204.076	244.086	399.278	285.432	349.285
524	ENSG00000051825	MPHOSPH9	22.7337	0.74297	0.982655	0.756084	0.449599	0.975317	11.3375	29.7416	12.5867	38.442	21.5608
525	ENSG00000052749	RRP12	62.8453	-0.834762	0.752127	-1.10987	0.267056	0.975317	34.0126	72.8157	121.671	20.1821	65.5448
526	ENSG00000052795	FNIP2	55.4349	-0.409622	0.671665	-0.609861	0.541954	0.975317	90.7003	41.0229	53.1439	42.2862	50.021
527	ENSG00000052802	MSMO1	295.285	-1.11144	0.391281	-2.84052	0.00450401	0.975317	474.759	363.053	290.893	186.444	161.275
528	ENSG00000052850	ALX4	0.19221	1.35581	4.55186	0.297858	0.765812	0.975317	0	0	0	0.96105	0
529	ENSG00000053254	FOXN3	238.415	-0.455237	0.486737	-0.935284	0.349642	0.975317	399.648	271.777	131.461	212.392	176.798
530	ENSG00000053371	AKR7A2	65.978	0.657545	0.667368	0.985281	0.324486	0.975317	55.2705	27.6905	77.618	61.5072	107.804
531	ENSG00000053372	MRTO4	187.145	0.602394	0.456529	1.31951	0.186999	0.975317	116.21	162.04	186.004	299.848	171.624
532	ENSG00000053438	NNAT	3.53363	1.82604	2.66956	0.684023	0.493961	0.975317	0	3.07672	2.09778	12.4937	0
533	ENSG00000053501	USE1	64.7642	0.230232	0.601135	0.382996	0.701723	0.975317	46.7673	71.7901	62.9335	75.923	66.4072
534	ENSG00000053524	MCF2L2	2.16772	1.92057	3.55915	0.539616	0.589462	0.975317	0	3.07672	0	0	7.76188
535	ENSG00000053747	LAMA3	13.3801	0.442706	1.21928	0.363088	0.716539	0.975317	11.3375	15.3836	8.39114	24.0263	7.76188
536	ENSG00000053770	AP5M1	23.4938	0.794461	1.01399	0.783502	0.433333	0.975317	19.8407	5.12786	29.369	26.9094	36.2221
537	ENSG00000053900	ANAPC4	11.4691	-1.15585	1.3521	-0.854854	0.392632	0.975317	15.5891	17.4347	11.1882	1.9221	11.2116
538	ENSG00000054116	TRAPPC3	237.833	-0.367091	0.458158	-0.801231	0.422998	0.975317	331.623	311.774	141.251	210.47	194.047
539	ENSG00000054118	THRAP3	227.107	0.209831	0.423019	0.496033	0.619871	0.975317	179.983	179.475	281.103	209.509	285.465
540	ENSG00000054148	PHPT1	9.39306	1.30226	1.68672	0.772068	0.440074	0.975317	2.83438	0	14.6845	9.6105	19.8359
541	ENSG00000054219	LY75	0.283438	-1.12159	4.56003	-0.245961	0.805712	0.975317	1.41719	0	0	0	0
542	ENSG00000054282	SDCCAG8	135.336	0.445504	0.637994	0.698289	0.484997	0.975317	31.1782	206.14	116.777	176.833	145.751
543	ENSG00000054356	PTPRN	14.489	-0.559517	1.29979	-0.430467	0.666856	0.975317	9.92034	13.3324	26.5719	1.9221	20.6984
544	ENSG00000054523	KIF1B	215.522	-0.19236	0.445172	-0.432103	0.665666	0.975317	317.451	205.115	158.732	222.964	173.349
545	ENSG00000054598	FOXC1	86.3552	0.146637	0.561686	0.261066	0.794041	0.975317	83.6143	107.685	57.3394	103.793	79.3437
546	ENSG00000054654	SYNE2	58.6378	-0.437324	0.615028	-0.711064	0.477045	0.975317	63.7736	69.7389	62.9335	51.8967	44.8464
547	ENSG00000054793	ATP9A	72.0531	0.976235	0.598151	1.63209	0.102661	0.975317	42.5158	72.8157	40.5572	92.2608	112.116
548	ENSG00000054796	SPO11	0.689945	3.22521	4.3909	0.734521	0.462631	0.975317	0	0	0	0	3.44973
549	ENSG00000054938	CHRDL2	1.03132	-1.59546	4.45389	-0.358216	0.720182	0.975317	0	0	4.19557	0.96105	0
550	ENSG00000054965	FAM168A	9.93501	3.55618	1.60323	2.21813	0.0265457	0.975317	0	1.02557	4.19557	29.7926	14.6613
551	ENSG00000054967	RELT	3.35075	1.67674	2.75556	0.608492	0.542861	0.975317	0	1.02557	4.19557	11.5326	0
552	ENSG00000054983	GALC	11.174	0.863591	1.33659	0.646113	0.518206	0.975317	4.25158	8.20458	12.5867	23.0652	7.76188
553	ENSG00000055118	KCNH2	0.172486	1.27694	4.55777	0.280167	0.779349	0.975317	0	0	0	0	0.862431
554	ENSG00000055130	CUL1	69.0706	-0.283881	0.638168	-0.444837	0.656437	0.975317	99.2034	78.9691	45.452	43.2473	78.4813
555	ENSG00000055147	FAM114A2	26.6903	0.413452	0.897361	0.460742	0.644983	0.975317	19.8407	18.4603	32.166	42.2862	20.6984
556	ENSG00000055163	CYFIP2	33.3839	-0.737459	0.85295	-0.864598	0.38726	0.975317	62.3564	38.9718	18.1808	24.9873	22.4232
557	ENSG00000055208	TAB2	61.1318	0.581083	0.640329	0.907476	0.364155	0.975317	31.1782	67.6878	53.8431	70.1567	82.7934
558	ENSG00000055332	EIF2AK2	95.6423	0.501646	0.555618	0.902862	0.366599	0.975317	49.6017	94.3527	101.393	134.547	98.3172
559	ENSG00000055483	USP36	320.376	0.881554	0.481534	1.83072	0.0671423	0.975317	133.216	281.007	303.479	623.721	260.454
560	ENSG00000055732	MCOLN3	14.4562	-4.14055	1.79416	-2.3078	0.0210105	0.975317	35.4298	0	34.2638	0	2.58729
561	ENSG00000055917	PUM2	87.336	0.459466	0.555953	0.826447	0.40855	0.975317	55.2705	97.4294	74.821	122.053	87.1056
562	ENSG00000055950	MRPL43	50.8594	0.369753	0.845978	0.437071	0.66206	0.975317	21.2579	92.3015	23.0756	28.8315	88.8304
563	ENSG00000055955	ITIH4	0.19221	1.35581	4.55186	0.297858	0.765812	0.975317	0	0	0	0.96105	0
564	ENSG00000056050	HPF1	13.9884	1.40637	1.20874	1.1635	0.244628	0.975317	15.5891	5.12786	4.89483	20.1821	24.1481
565	ENSG00000056097	ZFR	324.458	-0.236658	0.374505	-0.631922	0.527438	0.975317	382.642	391.769	262.223	286.393	299.264
566	ENSG00000056277	ZNF280C	2.66188	2.90984	3.2817	0.886686	0.375248	0.975317	0	0	2.09778	0	11.2116
567	ENSG00000056558	TRAF1	5.81316	-2.76008	2.28286	-1.20905	0.226645	0.975317	0	19.4859	6.99261	0	2.58729
568	ENSG00000056586	RC3H2	156.38	-0.85807	0.461436	-1.85956	0.0629471	0.975317	154.474	249.214	167.823	117.248	93.1426
569	ENSG00000056736	IL17RB	3.03591	5.35732	3.04565	1.75901	0.0785762	0.975317	0	0	0	13.4547	1.72486
570	ENSG00000056972	TRAF3IP2	49.4611	-1.35469	0.845242	-1.60273	0.108994	0.975317	25.5095	136.401	34.2638	19.221	31.91
571	ENSG00000056998	GYG2	6.28087	1.23624	1.72045	0.718554	0.472416	0.975317	7.08596	1.02557	4.19557	9.6105	9.48675
572	ENSG00000057019	DCBLD2	483.304	0.154402	0.344839	0.447751	0.654333	0.975317	386.893	547.656	452.422	460.343	569.205
573	ENSG00000057252	SOAT1	18.321	1.08706	1.06988	1.01606	0.309599	0.975317	12.7547	6.15344	18.8801	20.1821	33.6348
574	ENSG00000057593	F7	0.517459	2.81139	4.41159	0.637272	0.523948	0.975317	0	0	0	0	2.58729
575	ENSG00000057608	GDI2	349.776	-0.152162	0.366498	-0.415179	0.678011	0.975317	405.317	400.999	287.396	299.848	355.322
576	ENSG00000057657	PRDM1	36.6114	-0.529512	0.79114	-0.669302	0.503303	0.975317	39.6814	35.895	49.6476	17.2989	40.5343
577	ENSG00000057704	TMCC3	11.6268	2.20348	1.35236	1.62936	0.103238	0.975317	2.83438	2.05115	9.0904	26.9094	17.2486
578	ENSG00000057757	PITHD1	80.8874	0.134212	0.563294	0.238263	0.811677	0.975317	97.7862	62.5599	73.4224	99.9492	70.7194
579	ENSG00000057935	MTA3	5.51744	-0.879599	1.78262	-0.493431	0.621708	0.975317	4.25158	6.15344	9.78966	4.80525	2.58729
580	ENSG00000058056	USP13	23.2042	-2.55955	1.02326	-2.50136	0.0123718	0.975317	19.8407	56.4065	27.9705	5.7663	6.03702
581	ENSG00000058063	ATP11B	15.3914	-0.273142	1.14139	-0.239306	0.810868	0.975317	18.4235	23.5882	7.69188	13.4547	13.7989
582	ENSG00000058085	LAMC2	5.61186	0.729397	2.27672	0.320372	0.748686	0.975317	8.50315	0	4.89483	0	14.6613
583	ENSG00000058091	CDK14	347.288	-0.298194	0.396921	-0.751268	0.452491	0.975317	488.931	355.874	281.802	362.316	247.518
584	ENSG00000058262	SEC61A1	2184.11	-0.623399	0.398219	-1.56547	0.117473	0.975317	3489.13	2854.17	1279.65	1938.44	1359.19
585	ENSG00000058272	PPP1R12A	804.106	-0.16343	0.360353	-0.453527	0.650169	0.975317	1024.63	934.297	562.206	862.062	637.337
586	ENSG00000058404	CAMK2B	1.86543	1.73439	3.37249	0.514275	0.60706	0.975317	0	0	2.79705	4.80525	1.72486
587	ENSG00000058453	CROCC	7.38297	1.0291	1.89283	0.543683	0.58666	0.975317	1.41719	0	13.9852	16.3379	5.17459
588	ENSG00000058600	POLR3E	24.3795	-0.774473	0.947063	-0.817764	0.413492	0.975317	14.1719	32.8183	40.5572	15.3768	18.9735
589	ENSG00000058668	ATP2B4	368.932	0.436347	0.388973	1.12179	0.261951	0.975317	300.445	237.933	430.745	388.264	487.274
590	ENSG00000058729	RIOK2	17.1674	-0.984555	1.35578	-0.726192	0.467721	0.975317	24.0923	16.4092	23.7749	0	21.5608
591	ENSG00000058799	YIPF1	17.0166	0.366495	1.09099	0.33593	0.736923	0.975317	18.4235	20.5115	6.99261	20.1821	18.9735
592	ENSG00000058866	DGKG	6.24997	-0.79327	2.21766	-0.357706	0.720563	0.975317	17.0063	0	5.59409	8.64945	0
593	ENSG00000059145	UNKL	2.219	1.25875	3.5099	0.358628	0.719873	0.975317	0	0	4.19557	0	6.89945
594	ENSG00000059377	TBXAS1	1.34547	4.18278	4.3605	0.959244	0.337436	0.975317	0	0	0	6.72735	0
595	ENSG00000059588	TARBP1	11.1456	-1.70324	1.51687	-1.12287	0.261494	0.975317	8.50315	32.8183	4.89483	8.64945	0.862431
596	ENSG00000059691	GATB	11.323	0.544295	1.37773	0.395065	0.692795	0.975317	2.83438	10.2557	15.3838	22.1042	6.03702
597	ENSG00000059728	MXD1	5.44312	-0.802158	2.09716	-0.382498	0.702092	0.975317	0	13.3324	6.29335	6.72735	0.862431
598	ENSG00000059804	SLC2A3	61.3026	1.125	0.638368	1.76231	0.0780169	0.975317	26.9266	39.9973	57.3394	95.144	87.1056
599	ENSG00000059915	PSD	4.49396	2.94112	2.70641	1.08673	0.277158	0.975317	0	0	3.49631	0	18.9735
600	ENSG00000060069	CTDP1	22.0334	-2.9578	1.33124	-2.22185	0.0262937	0.975317	46.7673	5.12786	49.6476	0	8.62431
601	ENSG00000060138	YBX3	273.86	0.124248	0.465904	0.266681	0.789714	0.975317	136.05	274.853	381.097	246.99	330.311
602	ENSG00000060237	WNK1	570.846	-0.316355	0.327506	-0.965951	0.334069	0.975317	647.657	696.364	515.356	492.058	502.798
603	ENSG00000060339	CCAR1	461.386	-0.459117	0.334811	-1.37127	0.170289	0.975317	578.214	526.119	449.625	387.303	365.671
604	ENSG00000060558	GNA15	0.76884	3.37396	4.38477	0.769471	0.441614	0.975317	0	0	0	3.8442	0
605	ENSG00000060656	PTPRU	59.1901	-0.483937	0.66518	-0.727528	0.466902	0.975317	53.8533	102.557	44.0535	48.0525	47.4337
606	ENSG00000060688	SNRNP40	29.96	-1.19753	0.847378	-1.41322	0.157592	0.975317	38.2642	51.2786	26.5719	17.2989	16.3862
607	ENSG00000060709	RIMBP2	1.84603	-4.20034	4.29251	-0.978526	0.327814	0.975317	0	9.23015	0	0	0
608	ENSG00000060718	COL11A1	41.0005	1.16659	0.722352	1.61499	0.106314	0.975317	32.5954	26.6649	23.0756	69.1956	53.4708
609	ENSG00000060749	QSER1	194.969	-0.501753	0.408297	-1.22889	0.219112	0.975317	194.155	232.805	235.651	143.196	169.037
610	ENSG00000060762	MPC1	49.5191	-0.244211	0.683392	-0.357351	0.720829	0.975317	39.6814	69.7389	48.9483	37.481	51.7459
611	ENSG00000060971	ACAA1	0.344973	2.22873	4.4526	0.500545	0.616691	0.975317	0	0	0	0	1.72486
612	ENSG00000060982	BCAT1	95.0223	1.15728	0.646475	1.79014	0.0734321	0.975317	82.1971	23.5882	85.3099	95.144	188.872
613	ENSG00000061273	HDAC7	142.068	-0.354922	0.542371	-0.65439	0.51286	0.975317	92.1175	121.018	253.133	100.91	143.164
614	ENSG00000061337	LZTS1	1.44587	3.18758	3.76539	0.846547	0.397248	0.975317	0	0	0.699261	4.80525	1.72486
615	ENSG00000061676	NCKAP1	84.1032	0.147729	0.553694	0.266806	0.789618	0.975317	89.2831	57.4321	95.0995	94.1829	84.5183
616	ENSG00000061918	GUCY1B1	7.5139	1.12194	2.07041	0.541891	0.587893	0.975317	15.5891	0	0	12.4937	9.48675
617	ENSG00000061936	SFSWAP	97.8969	0.153215	0.58887	0.260185	0.794721	0.975317	77.9456	56.4065	146.146	128.781	80.2061
618	ENSG00000061938	TNK2	16.6775	-0.35134	1.07795	-0.325934	0.744475	0.975317	19.8407	15.3836	19.5793	9.6105	18.9735
619	ENSG00000061987	MON2	14.2778	1.57167	1.17199	1.34103	0.179911	0.975317	12.7547	5.12786	6.29335	23.0652	24.1481
620	ENSG00000062194	GPBP1	125.962	-0.166691	0.479909	-0.347338	0.728338	0.975317	150.222	99.4806	145.446	126.859	107.804
621	ENSG00000062282	DGAT2	0.344973	2.22873	4.4526	0.500545	0.616691	0.975317	0	0	0	0	1.72486
622	ENSG00000062370	ZNF112	0.172486	1.27694	4.55777	0.280167	0.779349	0.975317	0	0	0	0	0.862431
623	ENSG00000062485	CS	58.3267	-0.307724	0.660918	-0.465601	0.641501	0.975317	75.1112	76.918	37.7601	59.5851	42.2591
624	ENSG00000062524	LTK	0.279705	-1.6707	4.54204	-0.36783	0.713	0.975317	0	0	1.39852	0	0
625	ENSG00000062582	MRPS24	2.75978	5.22292	3.52168	1.48308	0.138054	0.975317	0	0	0	0	13.7989
626	ENSG00000062598	ELMO2	66.0543	-0.723094	0.670334	-1.07871	0.280718	0.975317	94.9519	105.634	34.9631	49.0136	45.7089
627	ENSG00000062716	VMP1	98.7168	0.268705	0.598043	0.449307	0.65321	0.975317	130.382	45.1252	98.5959	79.7672	139.714
628	ENSG00000062725	APPBP2	62.2958	-0.899752	0.608556	-1.4785	0.139273	0.975317	90.7003	71.7901	67.1291	41.3252	40.5343
629	ENSG00000062822	POLD1	1.29311	3.00751	4.36467	0.689059	0.490786	0.975317	0	0	0.699261	5.7663	0
630	ENSG00000063169	BICRA	1.03492	3.80891	4.37007	0.87159	0.383432	0.975317	0	0	0	0	5.17459
631	ENSG00000063176	SPHK2	3.40126	-5.06503	3.49116	-1.45082	0.146831	0.975317	17.0063	0	0	0	0
632	ENSG00000063180	CA11	1.78077	-4.15017	3.95465	-1.04944	0.293975	0.975317	0	8.20458	0.699261	0	0
633	ENSG00000063241	ISOC2	11.4703	-0.615521	1.26844	-0.485257	0.627494	0.975317	12.7547	17.4347	9.78966	9.6105	7.76188
634	ENSG00000063244	U2AF2	17.0064	-0.429082	1.05272	-0.407593	0.683573	0.975317	17.0063	17.4347	22.3764	14.4158	13.7989
635	ENSG00000063245	EPN1	652.425	-0.26243	0.37248	-0.704547	0.481092	0.975317	953.77	661.494	482.49	656.397	507.972
636	ENSG00000063322	MED29	25.317	-0.73999	1.06268	-0.696345	0.486213	0.975317	4.25158	32.8183	53.1439	18.26	18.1111
637	ENSG00000063438	AHRR	0.882155	3.57759	4.37734	0.817298	0.413758	0.975317	0	0	0	0.96105	3.44973
638	ENSG00000063587	ZNF275	72.2607	-0.15299	0.606319	-0.252326	0.800789	0.975317	94.9519	51.2786	79.7158	83.6114	51.7459
639	ENSG00000063660	GPC1	258.566	0.279769	0.434682	0.643616	0.519824	0.975317	148.805	231.779	332.848	275.821	303.576
640	ENSG00000063761	ADCK1	5.75839	1.5038	1.9936	0.754315	0.45066	0.975317	7.08596	3.07672	0	13.4547	5.17459
641	ENSG00000064012	CASP8	0.667858	1.39234	4.43895	0.313664	0.753776	0.975317	1.41719	0	0	1.9221	0
642	ENSG00000064042	LIMCH1	56.7183	1.08763	0.760451	1.43025	0.152646	0.975317	36.847	16.4092	63.6328	120.131	46.5713
643	ENSG00000064102	INTS13	100.483	-0.290377	0.59799	-0.485588	0.627259	0.975317	89.2831	100.506	134.957	134.547	43.1216
644	ENSG00000064199	SPA17	15.784	0.527947	1.1825	0.446467	0.65526	0.975317	7.08596	20.5115	12.5867	7.6884	31.0475
645	ENSG00000064205	CCN5	10.3122	1.4954	1.38428	1.08027	0.280021	0.975317	9.92034	6.15344	2.09778	14.4158	18.9735
646	ENSG00000064225	ST3GAL6	57.9806	-0.610173	0.72862	-0.837436	0.402347	0.975317	60.9393	59.4832	81.1143	71.1177	17.2486
647	ENSG00000064309	CDON	3.6847	-5.18082	3.40579	-1.52118	0.128214	0.975317	18.4235	0	0	0	0
648	ENSG00000064313	TAF2	157.882	-0.782667	0.436086	-1.79475	0.0726929	0.975317	208.327	197.936	162.928	103.793	116.428
649	ENSG00000064419	TNPO3	124.605	0.401324	0.537153	0.747132	0.454984	0.975317	82.1971	74.8668	173.417	161.456	131.09
650	ENSG00000064490	RFXANK	1.00228	2.59384	4.37719	0.592581	0.553462	0.975317	0	0	0.699261	0	4.31216
651	ENSG00000064545	TMEM161A	37.8778	-0.681846	0.795615	-0.857005	0.391442	0.975317	65.1908	31.7928	37.0609	18.26	37.0846
652	ENSG00000064547	LPAR2	0.96965	1.69774	4.37006	0.388493	0.697651	0.975317	0	0	1.39852	0	3.44973
653	ENSG00000064601	CTSA	0.19221	1.35581	4.55186	0.297858	0.765812	0.975317	0	0	0	0.96105	0
654	ENSG00000064651	SLC12A2	90.6487	-0.648439	0.69228	-0.936672	0.348927	0.975317	134.633	28.716	154.537	83.6114	51.7459
655	ENSG00000064652	SNX24	23.1748	1.32178	1.076	1.22842	0.21929	0.975317	24.0923	2.05115	17.4815	31.7147	40.5343
656	ENSG00000064655	EYA2	39.1938	-0.266432	0.95824	-0.278043	0.780979	0.975317	75.1112	45.1252	6.29335	21.1431	48.2962
657	ENSG00000064666	CNN2	39.6407	-0.261232	0.834196	-0.313154	0.754164	0.975317	51.0189	13.3324	62.9335	35.5589	35.3597
658	ENSG00000064692	SNCAIP	61.8496	0.75509	0.625037	1.20807	0.22702	0.975317	32.5954	52.3042	60.1365	87.4556	76.7564
659	ENSG00000064703	DDX20	51.4442	-1.9657	0.799628	-2.45827	0.013961	0.975317	124.713	48.2019	46.8505	28.8315	8.62431
660	ENSG00000064726	BTBD1	13.6156	1.90731	1.39492	1.36732	0.171524	0.975317	0	7.17901	11.8874	15.3768	33.6348
661	ENSG00000064763	FAR2	18.562	0.494283	1.22057	0.404959	0.685507	0.975317	19.8407	2.05115	25.8727	35.5589	9.48675
662	ENSG00000064932	SBNO2	14.9373	0.85754	1.42373	0.602321	0.54696	0.975317	12.7547	0	20.9778	12.4937	28.4602
663	ENSG00000064933	PMS1	9.29874	-1.88009	1.74122	-1.07975	0.280251	0.975317	0	9.23015	30.0682	2.88315	4.31216
664	ENSG00000064961	HMG20B	16.2377	-1.56066	1.14873	-1.3586	0.174275	0.975317	25.5095	24.6137	16.083	11.5326	3.44973
665	ENSG00000064989	CALCRL	0.283438	-1.12159	4.56003	-0.245961	0.805712	0.975317	1.41719	0	0	0	0
666	ENSG00000065000	AP3D1	922.021	0.250161	0.34313	0.729057	0.465967	0.975317	766.701	854.302	949.597	1301.26	738.241
667	ENSG00000065029	ZNF76	8.71506	-1.44149	1.69109	-0.852405	0.393989	0.975317	11.3375	8.20458	15.3838	8.64945	0
668	ENSG00000065054	SLC9A3R2	50.32	-0.513128	0.780056	-0.65781	0.510661	0.975317	21.2579	89.2248	60.8357	25.9484	54.3332
669	ENSG00000065057	NTHL1	7.47384	-2.32435	1.91657	-1.21276	0.225221	0.975317	0	11.2813	21.6771	0.96105	3.44973
670	ENSG00000065135	GNAI3	175.467	0.305457	0.478392	0.638509	0.523143	0.975317	90.7003	184.603	204.884	180.677	216.47
671	ENSG00000065154	OAT	9.21249	0.795552	1.56332	0.508887	0.610832	0.975317	1.41719	16.4092	3.49631	5.7663	18.9735
672	ENSG00000065243	PKN2	87.3158	-0.201632	0.525826	-0.383458	0.70138	0.975317	100.621	91.276	84.6106	80.7282	79.3437
673	ENSG00000065268	WDR18	50.0418	-0.887135	0.718277	-1.23509	0.216798	0.975317	83.6143	38.9718	61.535	22.1042	43.984
674	ENSG00000065308	TRAM2	211.835	0.553688	0.45048	1.2291	0.219033	0.975317	185.652	149.734	199.989	171.067	352.734
675	ENSG00000065328	MCM10	48.9214	-1.11112	0.867572	-1.28073	0.200289	0.975317	106.289	69.7389	11.1882	29.7926	27.5978
676	ENSG00000065361	ERBB3	5.10189	-5.65169	3.10155	-1.82222	0.0684221	0.975317	25.5095	0	0	0	0
677	ENSG00000065413	ANKRD44	3.6021	-0.642416	2.40477	-0.267142	0.78936	0.975317	0	2.05115	10.4889	2.88315	2.58729
678	ENSG00000065427	KARS1	165.251	0.801369	0.481035	1.66593	0.095728	0.975317	73.694	144.606	162.928	201.821	243.206
679	ENSG00000065457	ADAT1	60.5984	0.438403	0.74245	0.590482	0.554867	0.975317	15.5891	64.6111	78.3173	88.4166	56.058
680	ENSG00000065485	PDIA5	43.4783	-0.335308	0.717303	-0.467456	0.640173	0.975317	60.9393	33.8439	47.5498	42.2862	32.7724
681	ENSG00000065491	TBC1D22B	11.3827	0.508867	1.59299	0.319441	0.749392	0.975317	21.2579	8.20458	0	15.3768	12.074
682	ENSG00000065518	NDUFB4	62.6638	-0.393015	0.673244	-0.583763	0.55938	0.975317	53.8533	86.1481	67.8284	27.8705	77.6188
683	ENSG00000065526	SPEN	161.411	0.318849	0.47045	0.677752	0.497929	0.975317	127.547	138.452	174.116	239.301	127.64
684	ENSG00000065534	MYLK	448.661	0.326092	0.349695	0.932504	0.351076	0.975317	338.709	384.59	497.874	480.525	541.607
685	ENSG00000065548	ZC3H15	1251.6	-0.64954	0.31321	-2.07382	0.0380961	0.975317	1760.15	1479.9	1152.38	891.854	973.685
686	ENSG00000065559	MAP2K4	53.6564	0.159612	0.662695	0.240853	0.809669	0.975317	53.8533	46.1508	53.8431	39.4031	75.0315
687	ENSG00000065600	PACC1	5.57128	1.02657	2.1273	0.482571	0.6294	0.975317	11.3375	0	0.699261	2.88315	12.9365
688	ENSG00000065609	SNAP91	4.77569	2.34953	2.46937	0.95147	0.341366	0.975317	5.66877	0	0	0.96105	17.2486
689	ENSG00000065613	SLK	264.468	0.421688	0.38599	1.09248	0.27462	0.975317	181.401	258.444	258.027	320.03	304.438
690	ENSG00000065615	CYB5R4	18.0416	1.07091	1.07851	0.992951	0.320734	0.975317	5.66877	11.2813	20.2786	28.8315	24.1481
691	ENSG00000065618	COL17A1	0.978966	-3.31262	4.45644	-0.743333	0.45728	0.975317	0	0	4.89483	0	0
692	ENSG00000065665	SEC61A2	4.73287	-2.94524	2.2847	-1.28911	0.197358	0.975317	1.41719	13.3324	6.99261	1.9221	0
693	ENSG00000065717	TLE2	0.139852	-1.09577	4.56092	-0.240253	0.810134	0.975317	0	0	0.699261	0	0
694	ENSG00000065802	ASB1	76.2752	0.141999	0.558536	0.254234	0.799315	0.975317	77.9456	65.6367	76.2195	70.1567	91.4177
695	ENSG00000065809	FAM107B	153.378	0.994604	0.452981	2.19569	0.0281144	0.975317	89.2831	110.762	128.664	252.756	185.423
696	ENSG00000065833	ME1	43.5233	0.251472	0.699615	0.359443	0.719264	0.975317	38.2642	41.0229	41.9557	56.702	39.6718
697	ENSG00000065883	CDK13	90.1752	-0.572714	0.5754	-0.995332	0.319575	0.975317	86.4487	76.918	147.544	86.4945	53.4708
698	ENSG00000065911	MTHFD2	48.7721	1.27888	0.902022	1.41779	0.156252	0.975317	2.83438	30.7672	58.738	73.0398	78.4813
699	ENSG00000065923	SLC9A7	111.295	0.542944	0.608657	0.892037	0.372373	0.975317	36.847	158.964	86.0092	138.391	136.264
700	ENSG00000065970	FOXJ2	29.7815	-0.532526	0.880904	-0.604522	0.545496	0.975317	45.3501	15.3836	41.2564	20.1821	26.7354
701	ENSG00000065978	YBX1	1189.24	-0.106577	0.297043	-0.358792	0.71975	0.975317	1118.16	1352.73	1201.33	1031.21	1242.76
702	ENSG00000065989	PDE4A	23.1347	1.04847	0.927834	1.13002	0.258468	0.975317	18.4235	18.4603	11.8874	38.442	28.4602
703	ENSG00000066027	PPP2R5A	144.577	-0.264641	0.550899	-0.480379	0.630958	0.975317	218.248	179.475	67.8284	146.08	111.254
704	ENSG00000066032	CTNNA2	1.47126	-1.11137	3.78314	-0.293768	0.768935	0.975317	2.83438	0	2.79705	0	1.72486
705	ENSG00000066044	ELAVL1	79.6849	0.706572	0.587817	1.20203	0.229353	0.975317	85.0315	57.4321	48.9483	75.923	131.09
706	ENSG00000066084	DIP2B	68.8079	-0.385037	0.633444	-0.607847	0.543289	0.975317	110.541	66.6622	51.0461	44.2083	71.5818
707	ENSG00000066135	KDM4A	30.1918	0.604947	0.924799	0.654139	0.513022	0.975317	31.1782	32.8183	11.1882	57.663	18.1111
708	ENSG00000066136	NFYC	7.44093	0.848895	1.79887	0.471905	0.636994	0.975317	7.08596	0	9.78966	4.80525	15.5238
709	ENSG00000066248	NGEF	0.344973	2.22873	4.4526	0.500545	0.616691	0.975317	0	0	0	0	1.72486
710	ENSG00000066279	ASPM	144.574	-0.296468	0.492657	-0.601773	0.547325	0.975317	110.541	221.524	136.356	109.56	144.888
711	ENSG00000066294	CD84	0.517459	2.81139	4.41159	0.637272	0.523948	0.975317	0	0	0	0	2.58729
712	ENSG00000066322	ELOVL1	133.108	-0.400019	0.484572	-0.82551	0.409082	0.975317	177.149	164.092	101.393	104.754	118.153
713	ENSG00000066379	POLR1H	1.86472	3.59246	3.78958	0.947983	0.343138	0.975317	0	0	0.699261	0	8.62431
714	ENSG00000066382	MPPED2	1.98589	-1.65646	3.76065	-0.440472	0.659595	0.975317	0	8.20458	0	0	1.72486
715	ENSG00000066405	CLDN18	1.24934	-3.6518	4.44625	-0.821321	0.411463	0.975317	0	2.05115	4.19557	0	0
716	ENSG00000066422	ZBTB11	74.8455	-0.412858	0.568404	-0.726346	0.467627	0.975317	99.2034	74.8668	75.5202	54.7799	69.857
717	ENSG00000066427	ATXN3	52.5092	-0.89861	0.752133	-1.19475	0.232185	0.975317	58.1049	26.6649	108.386	37.481	31.91
718	ENSG00000066455	GOLGA5	58.6353	-0.491137	0.620597	-0.791395	0.428713	0.975317	63.7736	72.8157	62.2343	53.8188	40.5343
719	ENSG00000066468	FGFR2	2.68333	-4.72828	3.36802	-1.40388	0.160356	0.975317	9.92034	0	3.49631	0	0
720	ENSG00000066557	LRRC40	4.67108	-1.92986	2.13704	-0.903051	0.366499	0.975317	7.08596	5.12786	7.69188	0	3.44973
721	ENSG00000066583	ISOC1	10.4757	-0.399846	1.49886	-0.266766	0.789649	0.975317	24.0923	1.02557	9.78966	10.5716	6.89945
722	ENSG00000066629	EML1	52.5552	-0.233389	0.752096	-0.310318	0.756319	0.975317	21.2579	54.3554	91.6032	40.3641	55.1956
723	ENSG00000066654	THUMPD1	62.4439	-0.37226	0.62144	-0.599027	0.549155	0.975317	76.5284	73.8412	55.9409	40.3641	65.5448
724	ENSG00000066697	MSANTD3	65.4711	0.464944	0.669874	0.694077	0.487634	0.975317	73.694	27.6905	69.2269	56.702	100.042
725	ENSG00000066739	ATG2B	10.2197	0.648356	1.59795	0.405743	0.684932	0.975317	0	5.12786	19.5793	13.4547	12.9365
726	ENSG00000066777	ARFGEF1	106.298	-0.192375	0.529372	-0.363402	0.716304	0.975317	82.1971	102.557	150.341	115.326	81.0686
727	ENSG00000066813	ACSM2B	2.95745	-1.10042	3.23313	-0.340357	0.733587	0.975317	11.3375	0	0	0	3.44973
728	ENSG00000066827	ZFAT	7.54841	-0.970267	1.913	-0.507196	0.612017	0.975317	0	22.5626	5.59409	0.96105	8.62431
729	ENSG00000066855	MTFR1	9.39684	-0.360625	1.45296	-0.2482	0.803979	0.975317	15.5891	11.2813	4.19557	3.8442	12.074
730	ENSG00000066926	FECH	14.3342	-0.344296	1.25014	-0.275405	0.783005	0.975317	4.25158	30.7672	11.8874	14.4158	10.3492
731	ENSG00000067048	DDX3Y	8.97205	-2.07436	1.79486	-1.15572	0.247795	0.975317	24.0923	13.3324	1.39852	0	6.03702
732	ENSG00000067057	PFKP	141.468	-0.260925	0.467849	-0.557712	0.577041	0.975317	109.124	163.066	181.808	123.975	129.365
733	ENSG00000067064	IDI1	11.8844	0.791987	1.66258	0.476362	0.633817	0.975317	1.41719	0	25.8727	10.5716	21.5608
734	ENSG00000067066	SP100	112.157	0.537533	0.533477	1.0076	0.313645	0.975317	83.6143	134.35	67.1291	165.301	110.391
735	ENSG00000067082	KLF6	423.386	0.531081	0.371663	1.42893	0.153023	0.975317	269.266	368.181	439.835	441.122	598.527
736	ENSG00000067113	PLPP1	15.6551	-1.59859	1.51441	-1.05558	0.291158	0.975317	39.6814	0	24.4741	11.5326	2.58729
737	ENSG00000067141	NEO1	27.5749	-0.227215	0.93727	-0.242422	0.808453	0.975317	19.8407	51.2786	16.7823	16.3379	33.6348
738	ENSG00000067167	TRAM1	125.366	1.00447	0.472532	2.12572	0.0335263	0.975317	70.8596	95.3783	101.393	180.677	178.523
739	ENSG00000067177	PHKA1	11.4556	-0.684882	1.57542	-0.434729	0.663759	0.975317	36.847	1.02557	2.79705	10.5716	6.03702
740	ENSG00000067182	TNFRSF1A	413.005	-0.50491	0.377317	-1.33816	0.180845	0.975317	585.3	497.403	323.059	322.913	336.348
741	ENSG00000067208	EVI5	172.545	-0.248646	0.420555	-0.591232	0.554365	0.975317	170.063	186.654	195.793	140.313	169.899
742	ENSG00000067221	STOML1	28.7309	0.7303	0.842822	0.866493	0.38622	0.975317	21.2579	26.6649	20.2786	46.1304	29.3227
743	ENSG00000067225	PKM	4099.51	-0.707806	0.313279	-2.25935	0.0238619	0.975317	4751.84	3988.45	5815.76	2371.87	3569.6
744	ENSG00000067248	DHX29	149.529	-0.344422	0.45308	-0.760178	0.447148	0.975317	162.977	159.989	167.123	156.651	100.904
745	ENSG00000067334	DNTTIP2	250.969	-0.145546	0.417006	-0.349025	0.72707	0.975317	358.55	215.37	209.778	254.678	216.47
746	ENSG00000067365	METTL22	4.42005	-0.691878	2.19504	-0.315201	0.752609	0.975317	0	7.17901	8.39114	4.80525	1.72486
747	ENSG00000067369	TP53BP1	325.239	-0.472695	0.416278	-1.13553	0.256154	0.975317	501.686	328.183	269.216	320.991	206.121
748	ENSG00000067445	TRO	0.891471	-1.33824	4.46488	-0.299727	0.764386	0.975317	0	0	3.49631	0.96105	0
749	ENSG00000067533	RRP15	74.2155	0.255058	0.655545	0.389078	0.697218	0.975317	53.8533	36.9206	115.378	69.1956	95.7299
750	ENSG00000067560	RHOA	334.105	0.207376	0.390625	0.530882	0.595501	0.975317	347.212	343.567	253.832	274.86	451.052
751	ENSG00000067596	DHX8	79.0691	-0.504488	0.610997	-0.82568	0.408985	0.975317	114.793	107.685	46.8505	68.2346	57.7829
752	ENSG00000067715	SYT1	5.11147	1.74115	2.29984	0.757075	0.449005	0.975317	0	0	7.69188	14.4158	3.44973
753	ENSG00000067798	NAV3	347.509	0.679678	0.42662	1.59317	0.111123	0.975317	177.149	242.035	419.557	480.525	418.279
754	ENSG00000067829	IDH3G	72.6251	0.945655	0.619447	1.52661	0.126857	0.975317	76.5284	29.7416	53.1439	94.1829	109.529
755	ENSG00000067836	ROGDI	4.68415	-1.22134	2.16519	-0.56408	0.572699	0.975317	8.50315	2.05115	7.69188	0	5.17459
756	ENSG00000067840	PDZD4	0.172486	1.27694	4.55777	0.280167	0.779349	0.975317	0	0	0	0	0.862431
757	ENSG00000067900	ROCK1	688.692	0.241511	0.313497	0.770378	0.441076	0.975317	579.632	668.673	676.885	827.464	690.808
758	ENSG00000067992	PDK3	13.1591	1.43376	1.23636	1.15966	0.246186	0.975317	9.92034	3.07672	10.4889	17.2989	25.0105
759	ENSG00000068028	RASSF1	73.575	-0.224652	0.569953	-0.394159	0.693463	0.975317	82.1971	66.6622	85.3099	75.923	57.7829
760	ENSG00000068078	FGFR3	0.76884	3.37396	4.38477	0.769471	0.441614	0.975317	0	0	0	3.8442	0
761	ENSG00000068079	IFI35	11.6968	-1.22406	1.47893	-0.827667	0.407859	0.975317	1.41719	32.8183	11.1882	9.6105	3.44973
762	ENSG00000068097	HEATR6	42.4781	-0.998676	0.786655	-1.26952	0.204255	0.975317	51.0189	36.9206	71.3247	13.4547	39.6718
763	ENSG00000068305	MEF2A	49.6573	-0.770877	0.681278	-1.13152	0.257837	0.975317	48.1845	79.9947	50.3468	32.6757	37.0846
764	ENSG00000068308	OTUD5	355.625	-0.448375	0.373652	-1.19998	0.230147	0.975317	452.084	435.868	306.976	329.64	253.555
765	ENSG00000068323	TFE3	271.028	-0.275364	0.463029	-0.594701	0.552044	0.975317	456.336	235.882	182.507	277.743	202.671
766	ENSG00000068354	TBC1D25	15.9503	1.01994	1.15711	0.881451	0.378074	0.975317	12.7547	7.17901	13.9852	9.6105	36.2221
767	ENSG00000068366	ACSL4	141.858	0.56144	0.527987	1.06336	0.287619	0.975317	102.038	75.8924	179.011	130.703	221.645
768	ENSG00000068383	INPP5A	7.90318	4.27585	1.79075	2.38774	0.0169523	0.975317	0	2.05115	0.699261	22.1042	14.6613
769	ENSG00000068394	GPKOW	5.60099	-0.582054	2.04718	-0.284321	0.776165	0.975317	4.25158	12.3069	2.79705	8.64945	0
770	ENSG00000068438	FTSJ1	14.7525	0.272524	1.13061	0.241041	0.809523	0.975317	18.4235	9.23015	13.286	17.2989	15.5238
771	ENSG00000068489	PRR11	489.453	0.866488	0.411265	2.10689	0.0351273	0.975317	263.598	279.981	559.409	770.762	573.517
772	ENSG00000068650	ATP11A	5.89711	-1.96842	2.56253	-0.768154	0.442396	0.975317	0	0	25.1734	0	4.31216
773	ENSG00000068654	POLR1A	42.001	-0.908945	0.773316	-1.17539	0.23984	0.975317	35.4298	63.5855	55.9409	15.3768	39.6718
774	ENSG00000068697	LAPTM4A	277.513	0.821889	0.424162	1.93768	0.0526626	0.975317	170.063	275.879	190.898	272.938	477.787
775	ENSG00000068724	TTC7A	13.3375	1.19307	1.36504	0.874022	0.382106	0.975317	11.3375	1.02557	13.9852	31.7147	8.62431
776	ENSG00000068745	IP6K2	67.466	-1.16143	0.747619	-1.5535	0.120303	0.975317	153.057	82.0458	25.1734	36.5199	40.5343
777	ENSG00000068784	SRBD1	52.0085	-1.06376	0.75819	-1.40302	0.160611	0.975317	94.9519	53.3298	48.9483	49.0136	13.7989
778	ENSG00000068796	KIF2A	64.7514	0.287484	0.681928	0.421575	0.673335	0.975317	70.8596	30.7672	76.9188	45.1694	100.042
779	ENSG00000068831	RASGRP2	5.68088	-1.87147	2.62979	-0.711643	0.476686	0.975317	24.0923	0	0	0	4.31216
780	ENSG00000068878	PSME4	147.943	0.355761	0.540721	0.657939	0.510577	0.975317	58.1049	190.757	149.642	156.651	184.56
781	ENSG00000068885	IFT80	4.12942	-3.86089	2.78548	-1.38608	0.165723	0.975317	15.5891	0	4.19557	0	0.862431
782	ENSG00000068903	SIRT2	11.1799	-1.54371	1.68963	-0.913634	0.360909	0.975317	0	15.3836	30.0682	0.96105	9.48675
783	ENSG00000068912	ERLEC1	199.772	-0.135691	0.427146	-0.317668	0.750737	0.975317	172.897	262.547	186.004	215.275	162.137
784	ENSG00000068971	PPP2R5B	3.36116	5.50471	2.88004	1.91133	0.0559622	0.975317	0	0	0	12.4937	4.31216
785	ENSG00000069011	PITX1	410.099	-0.354289	0.337545	-1.0496	0.2939	0.975317	408.151	455.354	483.889	338.29	364.809
786	ENSG00000069020	MAST4	79.3755	0.164755	0.616089	0.26742	0.789146	0.975317	117.627	62.5599	47.5498	101.871	67.2697
787	ENSG00000069188	SDK2	0.139852	-1.09577	4.56092	-0.240253	0.810134	0.975317	0	0	0.699261	0	0
788	ENSG00000069275	NUCKS1	8394.16	-0.507566	0.339716	-1.49409	0.135152	0.975317	12353.7	10096.8	6122.73	7628.81	5768.8
789	ENSG00000069424	KCNAB2	3.6656	1.2297	2.62607	0.468266	0.639594	0.975317	0	0	6.99261	9.6105	1.72486
790	ENSG00000069482	GAL	1.73168	3.47566	3.50327	0.992119	0.321139	0.975317	0	0	0.699261	1.9221	6.03702
791	ENSG00000069493	CLEC2D	4.48607	1.48515	2.13605	0.695278	0.486881	0.975317	0	2.05115	5.59409	9.6105	5.17459
792	ENSG00000069509	FUNDC1	5.6368	0.944073	1.97131	0.478908	0.632004	0.975317	0	3.07672	9.0904	4.80525	11.2116
793	ENSG00000069812	HES2	0.19221	1.35581	4.55186	0.297858	0.765812	0.975317	0	0	0	0.96105	0
794	ENSG00000069849	ATP1B3	488.743	-0.317767	0.349458	-0.909315	0.363184	0.975317	415.237	536.375	639.824	396.914	455.364
795	ENSG00000069869	NEDD4	88.3217	0.424851	0.68737	0.618082	0.536521	0.975317	29.761	51.2786	151.04	117.248	92.2802
796	ENSG00000069966	GNB5	11.919	0.916028	1.45568	0.629279	0.529167	0.975317	9.92034	1.02557	15.3838	4.80525	28.4602
797	ENSG00000069974	RAB27A	38.5024	-0.815146	0.778588	-1.04695	0.295121	0.975317	41.0986	54.3554	44.0535	37.481	15.5238
798	ENSG00000070018	LRP6	65.0471	-0.801928	0.678916	-1.18119	0.237528	0.975317	99.2034	96.4038	39.8579	59.5851	30.1851
799	ENSG00000070019	GUCY2C	1.4358	-3.83791	4.44158	-0.864086	0.387541	0.975317	0	7.17901	0	0	0
800	ENSG00000070047	PHRF1	51.2929	-0.984461	0.786865	-1.25112	0.210891	0.975317	123.296	31.7928	37.0609	38.442	25.8729
801	ENSG00000070061	ELP1	13.7083	-0.688371	1.30436	-0.527745	0.597676	0.975317	2.83438	15.3836	30.0682	12.4937	7.76188
802	ENSG00000070081	NUCB2	342.362	-0.113208	0.348905	-0.324466	0.745585	0.975317	338.709	344.592	375.503	345.978	307.026
803	ENSG00000070087	PFN2	53.1108	-0.764801	0.71571	-1.06859	0.285254	0.975317	85.0315	58.4576	47.5498	20.1821	54.3332
804	ENSG00000070214	SLC44A1	77.1436	-0.696934	0.604171	-1.15354	0.24869	0.975317	128.964	54.3554	90.2047	59.5851	52.6083
805	ENSG00000070269	TMEM260	10.3535	-0.588499	1.65329	-0.355956	0.721874	0.975317	14.1719	0	21.6771	3.8442	12.074
806	ENSG00000070366	SMG6	13.3049	-1.12735	1.22221	-0.922384	0.356328	0.975317	26.9266	14.358	9.78966	7.6884	7.76188
807	ENSG00000070371	CLTCL1	5.1205	-1.38428	2.34239	-0.590966	0.554543	0.975317	11.3375	0	9.0904	0	5.17459
808	ENSG00000070388	FGF22	1.24075	2.1691	4.35253	0.498353	0.618236	0.975317	0	0	1.39852	4.80525	0
809	ENSG00000070404	FSTL3	9.11594	3.09754	1.75291	1.76709	0.0772137	0.975317	0	3.07672	3.49631	1.9221	37.0846
810	ENSG00000070413	DGCR2	51.8535	0.354328	0.671483	0.52768	0.597722	0.975317	62.3564	45.1252	32.8653	66.3125	52.6083
811	ENSG00000070423	RNF126	97.3685	0.286027	0.526579	0.54318	0.587006	0.975317	104.872	100.506	63.6328	105.716	112.116
812	ENSG00000070444	MNT	123.761	-0.27952	0.481437	-0.580595	0.561514	0.975317	143.136	155.887	100.694	109.56	109.529
813	ENSG00000070476	ZXDC	8.31403	-1.50416	1.78468	-0.842817	0.399331	0.975317	0	13.3324	20.2786	1.9221	6.03702
814	ENSG00000070495	JMJD6	25.3838	0.499197	0.911432	0.547705	0.583894	0.975317	15.5891	19.4859	30.0682	22.1042	39.6718
815	ENSG00000070501	POLB	16.5593	0.695683	1.34124	0.518685	0.60398	0.975317	0	25.6393	13.9852	17.2989	25.8729
816	ENSG00000070601	FRMPD1	0.139852	-1.09577	4.56092	-0.240253	0.810134	0.975317	0	0	0.699261	0	0
817	ENSG00000070610	GBA2	12.1504	-0.954618	1.50857	-0.632796	0.526867	0.975317	11.3375	16.4092	17.4815	0	15.5238
818	ENSG00000070614	NDST1	460.197	-0.456543	0.439263	-1.03934	0.298648	0.975317	734.105	551.758	263.622	440.161	311.338
819	ENSG00000070669	ASNS	2.11431	4.83527	3.91482	1.23512	0.216787	0.975317	0	0	0	10.5716	0
820	ENSG00000070718	AP3M2	28.2399	-0.260468	0.886164	-0.293927	0.768813	0.975317	38.2642	15.3836	37.0609	29.7926	20.6984
821	ENSG00000070756	PABPC1	1108.14	-0.0723559	0.302763	-0.238985	0.811117	0.975317	1094.07	1296.32	1000.64	987.959	1161.7
822	ENSG00000070759	TESK2	1.98806	-1.51197	3.4021	-0.444424	0.656736	0.975317	0	1.02557	6.99261	1.9221	0
823	ENSG00000070770	CSNK2A2	41.5601	-0.501526	0.714496	-0.701929	0.482723	0.975317	56.6877	42.0485	42.6549	33.6368	32.7724
824	ENSG00000070778	PTPN21	14.3598	0.384883	1.21885	0.315777	0.752172	0.975317	8.50315	23.5882	6.29335	23.0652	10.3492
825	ENSG00000070785	EIF2B3	105.255	-0.494804	0.606547	-0.815773	0.41463	0.975317	155.891	48.2019	153.138	100.91	68.1321
826	ENSG00000070808	CAMK2A	4.51443	-5.49534	2.54229	-2.16157	0.0306511	0.975317	4.25158	9.23015	9.0904	0	0
827	ENSG00000070814	TCOF1	81.6139	0.64826	0.616958	1.05074	0.29338	0.975317	38.2642	71.7901	88.8062	139.352	69.857
828	ENSG00000070831	CDC42	47.2616	-0.768309	0.85407	-0.899585	0.368341	0.975317	21.2579	63.5855	84.6106	54.7799	12.074
829	ENSG00000070882	OSBPL3	59.4625	0.621826	0.665972	0.933712	0.350452	0.975317	29.761	45.1252	71.3247	60.5462	90.5553
830	ENSG00000070950	RAD18	28.7504	-1.08457	0.860903	-1.2598	0.20774	0.975317	31.1782	50.2531	27.9705	15.3768	18.9735
831	ENSG00000070961	ATP2B1	1623.99	0.225942	0.359713	0.628116	0.529928	0.975317	1041.64	1327.09	2192.18	1973.04	1586.01
832	ENSG00000071051	NCK2	26.195	0.519206	0.978205	0.530774	0.595576	0.975317	15.5891	43.0741	8.39114	34.5978	29.3227
833	ENSG00000071054	MAP4K4	2982.18	-0.287319	0.343722	-0.835905	0.403208	0.975317	3986.56	3623.35	2034.15	2958.11	2308.73
834	ENSG00000071082	RPL31	373.492	0.766676	0.400343	1.91505	0.0554865	0.975317	249.426	364.078	261.524	350.783	641.649
835	ENSG00000071127	WDR1	808.292	-0.651489	0.414882	-1.5703	0.116346	0.975317	1299.57	1079.93	458.715	615.072	588.178
836	ENSG00000071189	SNX13	17.8302	-0.899358	1.07464	-0.836896	0.402651	0.975317	14.1719	16.4092	34.9631	11.5326	12.074
837	ENSG00000071242	RPS6KA2	55.7754	0.647209	0.664553	0.973901	0.330106	0.975317	51.0189	56.4065	29.369	56.702	85.3807
838	ENSG00000071243	ING3	53.7095	-0.307239	0.735878	-0.417514	0.676303	0.975317	52.4361	96.4038	25.8727	40.3641	53.4708
839	ENSG00000071282	LMCD1	1.04854	1.84649	4.36391	0.423127	0.672202	0.975317	0	0	1.39852	3.8442	0
840	ENSG00000071462	BUD23	132.66	1.16677	0.496125	2.35176	0.0186848	0.975317	63.7736	126.145	75.5202	196.054	201.809
841	ENSG00000071537	SEL1L	195.721	-0.235429	0.445878	-0.528011	0.597491	0.975317	150.222	253.316	220.967	139.352	214.745
842	ENSG00000071539	TRIP13	14.0051	2.70723	1.62337	1.66767	0.0953819	0.975317	0	0	12.5867	13.4547	43.984
843	ENSG00000071553	ATP6AP1	160.507	0.249464	0.44654	0.55866	0.576394	0.975317	155.891	116.915	174.815	155.69	199.222
844	ENSG00000071575	TRIB2	270.309	-0.463536	0.50603	-0.916025	0.359654	0.975317	347.212	419.459	144.747	296.964	143.164
845	ENSG00000071655	MBD3	130.448	-0.239197	0.540603	-0.442464	0.658154	0.975317	126.13	76.918	213.275	130.703	105.217
846	ENSG00000071794	HLTF	64.4791	-0.856963	0.633758	-1.35219	0.176313	0.975317	62.3564	113.839	59.4372	47.0915	39.6718
847	ENSG00000071859	FAM50A	104.476	-0.20732	0.607628	-0.341195	0.732957	0.975317	41.0986	140.503	148.943	96.105	95.7299
848	ENSG00000071889	FAM3A	36.8705	-0.367288	0.820793	-0.447479	0.654529	0.975317	17.0063	46.1508	58.0387	35.5589	27.5978
849	ENSG00000071909	MYO3B	1.39852	-3.81918	4.44203	-0.859784	0.389908	0.975317	0	0	6.99261	0	0
850	ENSG00000071967	CYBRD1	23.8793	-0.468098	1.00315	-0.466628	0.640766	0.975317	51.0189	12.3069	17.4815	23.0652	15.5238
851	ENSG00000071994	PDCD2	37.3475	-0.519378	0.837179	-0.620391	0.535	0.975317	72.2768	31.7928	23.7749	19.221	39.6718
852	ENSG00000072041	SLC6A15	12.6488	-0.639833	1.58303	-0.404183	0.686078	0.975317	7.08596	0	37.0609	9.6105	9.48675
853	ENSG00000072062	PRKACA	235.903	-0.299801	0.49927	-0.600477	0.548188	0.975317	361.384	291.263	113.28	231.613	181.973
854	ENSG00000072071	ADGRL1	10.41	-1.2866	1.66615	-0.772195	0.439999	0.975317	26.9266	0	13.9852	7.6884	3.44973
855	ENSG00000072110	ACTN1	2072.73	-0.18975	0.348882	-0.54388	0.586524	0.975317	2576.45	2531.11	1434.19	1542.49	2279.41
856	ENSG00000072121	ZFYVE26	20.9093	0.314752	0.999561	0.31489	0.752845	0.975317	15.5891	11.2813	30.0682	26.9094	20.6984
857	ENSG00000072134	EPN2	40.5612	-0.732696	0.769189	-0.952557	0.340815	0.975317	72.2768	44.0996	28.6697	24.9873	32.7724
858	ENSG00000072135	PTPN18	22.7008	-0.363021	1.03339	-0.351292	0.72537	0.975317	25.5095	7.17901	41.9557	17.2989	21.5608
859	ENSG00000072163	LIMS2	59.0412	0.348431	0.732887	0.475422	0.634486	0.975317	75.1112	60.5088	24.4741	98.0271	37.0846
860	ENSG00000072195	SPEG	15.4256	0.71031	1.14301	0.621441	0.53431	0.975317	15.5891	12.3069	9.0904	29.7926	10.3492
861	ENSG00000072210	ALDH3A2	8.6789	2.97804	1.66957	1.78372	0.0744694	0.975317	4.25158	0	2.79705	9.6105	26.7354
862	ENSG00000072274	TFRC	50.2557	0.222482	0.673091	0.330538	0.740994	0.975317	56.6877	47.1763	37.7601	43.2473	66.4072
863	ENSG00000072310	SREBF1	4.28096	2.2588	2.39768	0.942076	0.346154	0.975317	0	0	4.89483	9.6105	6.89945
864	ENSG00000072415	PALS1	108.166	0.502833	0.504105	0.997478	0.318533	0.975317	109.124	78.9691	90.2047	154.729	107.804
865	ENSG00000072422	RHOBTB1	10.956	-0.509481	1.61422	-0.315621	0.75229	0.975317	11.3375	0	25.8727	11.5326	6.03702
866	ENSG00000072501	SMC1A	548.659	-0.183083	0.323324	-0.566252	0.571223	0.975317	603.724	583.551	541.228	560.292	454.501
867	ENSG00000072506	HSD17B10	152.553	-0.21548	0.472507	-0.456035	0.648365	0.975317	136.05	220.498	127.965	156.651	121.603
868	ENSG00000072518	MARK2	104.357	-0.538608	0.557749	-0.965682	0.334203	0.975317	104.872	179.475	73.4224	85.5335	78.4813
869	ENSG00000072571	HMMR	36.6398	0.438995	0.758093	0.579078	0.562537	0.975317	25.5095	34.8695	35.6623	50.9357	36.2221
870	ENSG00000072657	TRHDE	31.1625	-0.772829	0.827356	-0.934095	0.350255	0.975317	52.4361	29.7416	30.0682	21.1431	22.4232
871	ENSG00000072682	P4HA2	67.0254	-0.806511	0.644567	-1.25125	0.210845	0.975317	109.124	84.097	49.6476	58.6241	33.6348
872	ENSG00000072736	NFATC3	4.05111	5.77461	2.66057	2.17044	0.0299736	0.975317	0	0	0	12.4937	7.76188
873	ENSG00000072756	TRNT1	32.6357	0.546873	0.938089	0.582965	0.559917	0.975317	21.2579	7.17901	53.8431	40.3641	40.5343
874	ENSG00000072778	ACADVL	51.461	0.331712	0.671186	0.494217	0.621153	0.975317	49.6017	49.2275	41.2564	41.3252	75.894
875	ENSG00000072786	STK10	86.8612	0.81499	0.592824	1.37476	0.169206	0.975317	53.8533	59.4832	86.0092	163.379	71.5818
876	ENSG00000072818	ACAP1	10.0666	-1.93523	1.48666	-1.30173	0.193008	0.975317	21.2579	4.10229	17.4815	5.7663	1.72486
877	ENSG00000072832	CRMP1	0.344973	2.22873	4.4526	0.500545	0.616691	0.975317	0	0	0	0	1.72486
878	ENSG00000072849	DERL2	86.6561	-0.388397	0.575313	-0.675106	0.499608	0.975317	94.9519	83.0714	109.085	46.1304	100.042
879	ENSG00000072952	IRAG1	53.4758	0.576591	0.705066	0.817783	0.413481	0.975317	45.3501	66.6622	22.3764	60.5462	72.4442
880	ENSG00000072954	TMEM38A	8.36701	-0.695581	2.34827	-0.296209	0.76707	0.975317	29.761	0	0	0	12.074
881	ENSG00000073008	PVR	200.935	0.792608	0.443621	1.78668	0.0739899	0.975317	126.13	123.069	216.072	297.926	241.481
882	ENSG00000073060	SCARB1	5.08594	-4.19869	2.58761	-1.62261	0.104672	0.975317	0	11.2813	13.286	0	0.862431
883	ENSG00000073111	MCM2	0.76884	3.37396	4.38477	0.769471	0.441614	0.975317	0	0	0	3.8442	0
884	ENSG00000073146	MOV10L1	0.76884	3.37396	4.38477	0.769471	0.441614	0.975317	0	0	0	3.8442	0
885	ENSG00000073150	PANX2	0.419557	-2.12174	4.518	-0.46962	0.638627	0.975317	0	0	2.09778	0	0
886	ENSG00000073169	SELENOO	10.9344	1.15743	1.8201	0.635916	0.524831	0.975317	0	0	21.6771	10.5716	22.4232
887	ENSG00000073331	ALPK1	8.26262	-1.55857	1.6457	-0.947058	0.343609	0.975317	22.6751	6.15344	4.89483	6.72735	0.862431
888	ENSG00000073350	LLGL2	1.55238	4.393	4.3561	1.00847	0.313229	0.975317	0	0	0	0	7.76188
889	ENSG00000073417	PDE8A	12.3507	-0.564261	1.33749	-0.421881	0.673112	0.975317	2.83438	25.6393	13.9852	11.5326	7.76188
890	ENSG00000073464	CLCN4	14.981	-0.676461	1.50369	-0.449867	0.652806	0.975317	43.9329	0	9.0904	11.5326	10.3492
891	ENSG00000073578	SDHA	9.76498	1.39181	1.94204	0.716673	0.473576	0.975317	0	0	17.4815	2.88315	28.4602
892	ENSG00000073584	SMARCE1	7.30557	-0.860557	1.87462	-0.459058	0.646193	0.975317	5.66877	0	20.9778	3.8442	6.03702
893	ENSG00000073711	PPP2R3A	87.5941	-0.391645	0.608276	-0.643862	0.519665	0.975317	124.713	77.9435	88.1069	39.4031	107.804
894	ENSG00000073712	FERMT2	177.111	0.541421	0.475349	1.139	0.254704	0.975317	124.713	101.532	222.365	223.925	213.021
895	ENSG00000073756	PTGS2	11.6343	-1.19354	1.64671	-0.724806	0.468571	0.975317	0	7.17901	37.7601	2.88315	10.3492
896	ENSG00000073792	IGF2BP2	530.48	-0.229549	0.330606	-0.694327	0.487477	0.975317	653.325	479.968	558.011	482.447	478.649
897	ENSG00000073803	MAP3K13	122.74	0.309611	0.540679	0.572633	0.566893	0.975317	77.9456	78.9691	178.312	133.586	144.888
898	ENSG00000073849	ST6GAL1	2.82398	5.25317	3.10525	1.69171	0.0907018	0.975317	0	0	0	11.5326	2.58729
899	ENSG00000073861	TBX21	0.279705	-1.6707	4.54204	-0.36783	0.713	0.975317	0	0	1.39852	0	0
900	ENSG00000073905	VDAC1P1	51.4999	-0.551396	0.760103	-0.725422	0.468193	0.975317	56.6877	97.4294	23.0756	34.5978	45.7089
901	ENSG00000073910	FRY	19.4416	-1.1759	1.07656	-1.09228	0.274712	0.975317	41.0986	10.2557	23.7749	13.4547	8.62431
902	ENSG00000073921	PICALM	119.276	0.362971	0.508355	0.714011	0.47522	0.975317	93.5347	103.583	123.769	96.105	179.386
903	ENSG00000073969	NSF	19.0599	0.325809	1.02276	0.318558	0.750062	0.975317	25.5095	13.3324	13.286	17.2989	25.8729
904	ENSG00000074047	GLI2	3.79932	-2.08934	2.71514	-0.769514	0.441588	0.975317	0	1.02557	15.3838	0	2.58729
905	ENSG00000074054	CLASP1	30.5428	-0.62949	0.882778	-0.713078	0.475797	0.975317	18.4235	34.8695	53.1439	30.7536	15.5238
906	ENSG00000074071	MRPS34	57.7518	0.685838	0.746595	0.918622	0.358293	0.975317	14.1719	48.2019	76.2195	68.2346	81.931
907	ENSG00000074181	NOTCH3	15.1834	3.16825	1.30597	2.42598	0.0152673	0.975317	0	4.10229	6.29335	24.9873	40.5343
908	ENSG00000074201	CLNS1A	57.7237	-1.04419	0.671577	-1.55483	0.119986	0.975317	51.0189	109.736	57.3394	31.7147	38.8094
909	ENSG00000074211	PPP2R2C	1.02557	-3.35279	4.45511	-0.752572	0.451707	0.975317	0	5.12786	0	0	0
910	ENSG00000074266	EED	5.68688	1.28602	1.83984	0.698985	0.484562	0.975317	5.66877	1.02557	4.19557	2.88315	14.6613
911	ENSG00000074319	TSG101	61.7581	1.1335	0.617214	1.83648	0.0662862	0.975317	35.4298	47.1763	42.6549	74.0009	109.529
912	ENSG00000074356	NCBP3	72.9921	-0.916698	0.590355	-1.55279	0.120473	0.975317	68.0252	99.4806	102.092	38.442	56.9205
913	ENSG00000074370	ATP2A3	17.8585	0.830811	1.30719	0.63557	0.525057	0.975317	0	26.6649	13.9852	20.1821	28.4602
914	ENSG00000074410	CA12	41.68	-0.265869	0.716749	-0.370937	0.710684	0.975317	41.0986	50.2531	42.6549	44.2083	30.1851
915	ENSG00000074527	NTN4	3.90189	0.998431	2.55386	0.39095	0.695834	0.975317	0	4.10229	4.19557	0	11.2116
916	ENSG00000074590	NUAK1	441.665	-0.793312	0.444139	-1.78618	0.0740703	0.975317	758.198	570.218	267.118	357.511	255.28
917	ENSG00000074621	SLC24A1	19.6077	0.945013	1.35929	0.695228	0.486912	0.975317	0	37.9462	4.89483	33.6368	21.5608
918	ENSG00000074657	ZNF532	76.641	0.357195	0.640849	0.557377	0.57727	0.975317	43.9329	115.89	46.8505	73.0398	103.492
919	ENSG00000074660	SCARF1	1.33887	-3.71628	4.41352	-0.842022	0.399776	0.975317	5.66877	1.02557	0	0	0
920	ENSG00000074695	LMAN1	616.778	0.339065	0.365713	0.927133	0.353858	0.975317	384.059	543.554	744.014	752.502	659.76
921	ENSG00000074696	HACD3	60.105	0.35208	0.659366	0.533967	0.593364	0.975317	49.6017	34.8695	77.618	54.7799	83.6559
922	ENSG00000074706	IPCEF1	0.696759	1.95789	4.40488	0.444482	0.656694	0.975317	0	0	0.699261	1.9221	0.862431
923	ENSG00000074803	SLC12A1	0.19221	1.35581	4.55186	0.297858	0.765812	0.975317	0	0	0	0.96105	0
924	ENSG00000074842	MYDGF	75.3134	0.992827	0.683882	1.45175	0.146571	0.975317	24.0923	50.2531	86.7084	66.3125	149.201
925	ENSG00000074935	TUBE1	12.7641	-0.485861	1.27415	-0.381322	0.702964	0.975317	5.66877	25.6393	11.8874	7.6884	12.9365
926	ENSG00000074964	ARHGEF10L	91.0073	-0.672844	0.692766	-0.971242	0.331428	0.975317	144.554	148.708	27.9705	76.884	56.9205
927	ENSG00000074966	TXK	1.34547	4.18278	4.3605	0.959244	0.337436	0.975317	0	0	0	6.72735	0
928	ENSG00000075035	WSCD2	0.410229	-2.04198	4.52287	-0.451479	0.651644	0.975317	0	2.05115	0	0	0
929	ENSG00000075131	TIPIN	6.99045	0.496347	1.65169	0.300508	0.76379	0.975317	9.92034	6.15344	2.09778	3.8442	12.9365
930	ENSG00000075142	SRI	17.0905	0.810136	1.17749	0.688021	0.49144	0.975317	4.25158	8.20458	26.5719	15.3768	31.0475
931	ENSG00000075151	EIF4G3	227.399	-0.214306	0.406078	-0.527747	0.597675	0.975317	194.155	226.652	300.682	199.898	215.608
932	ENSG00000075188	NUP37	6.21784	-1.47565	2.01648	-0.731794	0.464294	0.975317	1.41719	6.15344	17.4815	0	6.03702
933	ENSG00000075213	SEMA3A	431.396	-0.120761	0.383458	-0.314927	0.752817	0.975317	359.967	361.002	615.35	366.16	454.501
934	ENSG00000075218	GTSE1	53.3978	0.608695	0.788644	0.771825	0.440218	0.975317	11.3375	44.0996	76.2195	74.9619	60.3702
935	ENSG00000075234	TTC38	3.61431	1.6005	2.33465	0.685542	0.493002	0.975317	0	3.07672	2.79705	9.6105	2.58729
936	ENSG00000075239	ACAT1	28.9854	0.229796	0.881178	0.260782	0.79426	0.975317	24.0923	14.358	42.6549	33.6368	30.1851
937	ENSG00000075292	ZNF638	136.68	-0.450924	0.504201	-0.894333	0.371144	0.975317	89.2831	185.629	183.906	121.092	103.492
938	ENSG00000075303	SLC25A40	0.517459	2.81139	4.41159	0.637272	0.523948	0.975317	0	0	0	0	2.58729
939	ENSG00000075336	TIMM21	81.6649	-0.25868	0.557238	-0.464217	0.642492	0.975317	99.2034	72.8157	90.2047	87.4556	58.6453
940	ENSG00000075340	ADD2	46.3154	-0.619245	0.78556	-0.788286	0.43053	0.975317	51.0189	88.1993	22.3764	43.2473	26.7354
941	ENSG00000075391	RASAL2	80.1689	-0.483902	0.566535	-0.854142	0.393026	0.975317	66.608	115.89	88.8062	60.5462	68.9945
942	ENSG00000075399	VPS9D1	6.64389	1.9269	1.69667	1.1357	0.256084	0.975317	1.41719	5.12786	2.79705	5.7663	18.1111
943	ENSG00000075415	SLC25A3	398.391	-0.174593	0.397641	-0.439072	0.660609	0.975317	515.858	477.917	259.426	341.173	397.581
944	ENSG00000075420	FNDC3B	215.288	0.47809	0.425521	1.12354	0.261208	0.975317	148.805	165.117	243.343	294.081	225.095
945	ENSG00000075426	FOSL2	88.6902	-1.07825	0.602144	-1.79069	0.0733431	0.975317	111.958	155.887	69.2269	70.1567	36.2221
946	ENSG00000075429	CACNG5	0.172486	1.27694	4.55777	0.280167	0.779349	0.975317	0	0	0	0	0.862431
947	ENSG00000075539	FRYL	107.203	-0.601164	0.538253	-1.11688	0.264046	0.975317	162.977	113.839	95.7988	104.754	58.6453
948	ENSG00000075568	TMEM131	109.984	0.967184	0.687659	1.40649	0.159579	0.975317	22.6751	55.3809	159.432	178.755	133.677
949	ENSG00000075618	FSCN1	215.615	0.591456	0.444861	1.32953	0.183673	0.975317	133.216	190.757	213.275	194.132	346.697
950	ENSG00000075624	ACTB	1869.23	0.729352	0.328626	2.21939	0.0264599	0.975317	1208.86	1210.18	2018.77	2490.08	2418.26
951	ENSG00000075643	MOCOS	12.2416	1.04048	1.21616	0.855546	0.392249	0.975317	8.50315	8.20458	9.0904	17.2989	18.1111
952	ENSG00000075651	PLD1	17.8796	-0.340085	1.12926	-0.301158	0.763294	0.975317	26.9266	16.4092	15.3838	4.80525	25.8729
953	ENSG00000075711	DLG1	80.526	-0.549369	0.544488	-1.00896	0.312992	0.975317	96.3691	83.0714	97.1973	59.5851	66.4072
954	ENSG00000075785	RAB7A	677.382	-0.15874	0.315152	-0.503694	0.614477	0.975317	796.462	699.441	625.14	662.163	603.702
955	ENSG00000075790	BCAP29	3.07033	5.37544	2.96606	1.81232	0.0699375	0.975317	0	0	0	6.72735	8.62431
956	ENSG00000075826	SEC31B	2.36849	-1.76872	3.54308	-0.499205	0.617635	0.975317	9.92034	0	0	1.9221	0
957	ENSG00000075856	SART3	75.5887	0.730444	0.738153	0.989556	0.322391	0.975317	46.7673	21.537	110.483	142.235	56.9205
958	ENSG00000075884	ARHGAP15	0.978966	-3.31262	4.45644	-0.743333	0.45728	0.975317	0	0	4.89483	0	0
959	ENSG00000075945	KIFAP3	102.088	-0.833044	0.588338	-1.41593	0.156797	0.975317	194.155	114.864	62.9335	72.0788	66.4072
960	ENSG00000075975	MKRN2	0.96105	3.69657	4.37346	0.845227	0.397984	0.975317	0	0	0	4.80525	0
961	ENSG00000076003	MCM6	11.5736	0.377605	1.41638	0.266599	0.789778	0.975317	5.66877	11.2813	13.9852	1.9221	25.0105
962	ENSG00000076053	RBM7	7.59143	0.561235	1.54396	0.363504	0.716229	0.975317	2.83438	9.23015	6.99261	7.6884	11.2116
963	ENSG00000076067	RBMS2	41.3252	1.54478	0.81217	1.90204	0.0571665	0.975317	17.0063	11.2813	41.2564	83.6114	53.4708
964	ENSG00000076108	BAZ2A	267.061	0.4912	0.412481	1.19084	0.233715	0.975317	162.977	285.109	240.546	376.732	269.941
965	ENSG00000076201	PTPN23	133.41	-0.599071	0.514951	-1.16336	0.244685	0.975317	232.419	127.171	104.19	106.677	96.5923
966	ENSG00000076242	MLH1	10.1952	0.690126	1.43846	0.479767	0.631393	0.975317	2.83438	15.3836	6.29335	5.7663	20.6984
967	ENSG00000076248	UNG	18.6341	1.22378	1.03073	1.18729	0.235112	0.975317	9.92034	17.4347	9.0904	31.7147	25.0105
968	ENSG00000076344	RGS11	0.559409	-2.52373	4.49154	-0.561885	0.574194	0.975317	0	0	2.79705	0	0
969	ENSG00000076351	SLC46A1	2.45676	2.27776	3.37278	0.675335	0.499463	0.975317	0	0	2.79705	0	9.48675
970	ENSG00000076356	PLXNA2	0.283438	-1.12159	4.56003	-0.245961	0.805712	0.975317	1.41719	0	0	0	0
971	ENSG00000076513	ANKRD13A	169.493	-0.184694	0.440498	-0.419284	0.675009	0.975317	145.971	179.475	208.38	131.664	181.973
972	ENSG00000076554	TPD52	2.55466	4.07732	3.36758	1.21076	0.225988	0.975317	0	0	0.699261	0	12.074
973	ENSG00000076555	ACACB	0.172486	1.27694	4.55777	0.280167	0.779349	0.975317	0	0	0	0	0.862431
974	ENSG00000076604	TRAF4	1.4742	1.83987	3.74512	0.49127	0.623236	0.975317	0	0	2.09778	0.96105	4.31216
975	ENSG00000076650	GPATCH1	54.1549	0.212983	0.66097	0.322228	0.74728	0.975317	65.1908	54.3554	33.5645	62.4683	55.1956
976	ENSG00000076685	NT5C2	7.57814	-6.22811	2.29124	-2.71823	0.00656314	0.975317	17.0063	19.4859	1.39852	0	0
977	ENSG00000076706	MCAM	12.921	1.23467	1.20059	1.02839	0.303768	0.975317	7.08596	8.20458	9.78966	15.3768	24.1481
978	ENSG00000076770	MBNL3	1.21778	-1.85373	4.44462	-0.417073	0.676625	0.975317	0	5.12786	0	0.96105	0
979	ENSG00000076826	CAMSAP3	0.172486	1.27694	4.55777	0.280167	0.779349	0.975317	0	0	0	0	0.862431
980	ENSG00000076864	RAP1GAP	0.419557	-2.12174	4.518	-0.46962	0.638627	0.975317	0	0	2.09778	0	0
981	ENSG00000076924	XAB2	1.9766	-4.28781	3.75693	-1.14131	0.253742	0.975317	7.08596	0	2.79705	0	0
982	ENSG00000076928	ARHGEF1	27.1269	-0.643678	0.871162	-0.738873	0.459984	0.975317	29.761	35.895	29.369	25.9484	14.6613
983	ENSG00000076944	STXBP2	1.03132	-1.59546	4.45389	-0.358216	0.720182	0.975317	0	0	4.19557	0.96105	0
984	ENSG00000076984	MAP2K7	47.6526	0.53367	0.775746	0.687944	0.491488	0.975317	14.1719	39.9973	66.4298	62.4683	55.1956
985	ENSG00000077063	CTTNBP2	15.068	1.1443	1.18181	0.968263	0.332913	0.975317	11.3375	14.358	4.89483	32.6757	12.074
986	ENSG00000077092	RARB	2.83438	-4.80131	3.70277	-1.29668	0.19474	0.975317	14.1719	0	0	0	0
987	ENSG00000077097	TOP2B	334.225	-0.50666	0.412654	-1.22781	0.219519	0.975317	476.176	416.383	245.441	312.341	220.782
988	ENSG00000077147	TM9SF3	404.059	-0.43808	0.362181	-1.20956	0.226447	0.975317	452.084	541.502	360.819	295.042	370.846
989	ENSG00000077150	NFKB2	61.9862	0.813165	0.63669	1.27718	0.20154	0.975317	32.5954	68.7134	41.2564	84.5724	82.7934
990	ENSG00000077235	GTF3C1	125.103	-0.126717	0.516821	-0.245186	0.806313	0.975317	160.143	129.222	99.2951	156.651	80.2061
991	ENSG00000077238	IL4R	20.4547	1.35669	1.17566	1.15399	0.248504	0.975317	5.66877	5.12786	26.5719	10.5716	54.3332
992	ENSG00000077254	USP33	125.029	0.177871	0.481562	0.369363	0.711857	0.975317	97.7862	105.634	152.439	136.469	132.814
993	ENSG00000077264	PAK3	19.2464	-0.605391	1.23023	-0.492095	0.622652	0.975317	49.6017	13.3324	4.19557	23.0652	6.03702
994	ENSG00000077312	SNRPA	642.438	-0.461275	0.447309	-1.03122	0.302437	0.975317	1040.22	794.819	330.051	631.41	415.692
995	ENSG00000077348	EXOSC5	38.9438	0.218131	0.824143	0.264677	0.791258	0.975317	66.608	22.5626	20.9778	50.9357	33.6348
996	ENSG00000077380	DYNC1I2	782.011	-0.330466	0.359765	-0.918559	0.358326	0.975317	1153.59	759.949	642.621	780.373	573.517
997	ENSG00000077420	APBB1IP	39.6323	0.50634	0.719408	0.703829	0.481539	0.975317	35.4298	32.8183	33.5645	48.0525	48.2962
998	ENSG00000077458	FAM76B	28.8489	-1.27088	1.1988	-1.06013	0.289087	0.975317	60.9393	23.5882	28.6697	0	31.0475
999	ENSG00000077463	SIRT6	14.9387	1.59204	1.46241	1.08864	0.276314	0.975317	5.66877	0	18.8801	9.6105	40.5343
1000	ENSG00000077549	CAPZB	242.146	0.625905	0.449114	1.39364	0.163425	0.975317	120.461	198.961	276.208	262.367	352.734
1001	ENSG00000077585	GPR137B	13.0284	0.587986	1.19193	0.493306	0.621797	0.975317	8.50315	9.23015	14.6845	16.3379	16.3862
1002	ENSG00000077684	JADE1	102.412	-0.252487	0.689406	-0.366239	0.714187	0.975317	154.474	145.631	28.6697	122.053	61.2326
1003	ENSG00000077713	SLC25A43	16.2537	1.32399	1.22192	1.08353	0.278574	0.975317	12.7547	12.3069	5.59409	5.7663	44.8464
1004	ENSG00000077721	UBE2A	17.6099	1.37799	1.3275	1.03804	0.299253	0.975317	5.66877	1.02557	25.1734	9.6105	46.5713
1005	ENSG00000077782	FGFR1	533.734	0.0890482	0.32013	0.278162	0.780888	0.975317	569.711	498.428	493.679	549.721	557.131
1006	ENSG00000077935	SMC1B	0.19221	1.35581	4.55186	0.297858	0.765812	0.975317	0	0	0	0.96105	0
1007	ENSG00000077942	FBLN1	315.555	0.619748	0.400471	1.54755	0.121731	0.975317	262.181	324.081	193.695	320.03	477.787
1008	ENSG00000077943	ITGA8	37.9397	-0.629816	0.895007	-0.7037	0.48162	0.975317	12.7547	34.8695	84.6106	22.1042	35.3597
1009	ENSG00000078043	PIAS2	30.2856	-0.564707	0.994389	-0.567894	0.570107	0.975317	7.08596	65.6367	31.4668	31.7147	15.5238
1010	ENSG00000078053	AMPH	4.33539	-5.4375	2.85856	-1.90218	0.057147	0.975317	0	15.3836	6.29335	0	0
1011	ENSG00000078061	ARAF	52.6115	0.227099	0.758588	0.299371	0.764657	0.975317	62.3564	69.7389	16.083	60.5462	54.3332
1012	ENSG00000078070	MCCC1	8.0597	0.584286	1.54686	0.377724	0.705635	0.975317	5.66877	8.20458	6.29335	2.88315	17.2486
1013	ENSG00000078098	FAP	24.6499	0.454878	1.21176	0.375387	0.707373	0.975317	5.66877	3.07672	55.2417	14.4158	44.8464
1014	ENSG00000078124	ACER3	45.1487	0.952435	0.767302	1.24128	0.214503	0.975317	18.4235	23.5882	55.9409	51.8967	75.894
1015	ENSG00000078140	UBE2K	151.215	0.22044	0.452602	0.487051	0.626222	0.975317	154.474	106.66	164.326	171.067	159.55
1016	ENSG00000078142	PIK3C3	41.8759	0.892702	0.726571	1.22865	0.219203	0.975317	34.0126	24.6137	34.9631	44.2083	71.5818
1017	ENSG00000078177	N4BP2	14.5876	0.875999	1.17597	0.744916	0.456323	0.975317	8.50315	12.3069	11.8874	30.7536	9.48675
1018	ENSG00000078237	TIGAR	29.2454	-1.13242	0.965807	-1.17251	0.240991	0.975317	28.3438	12.3069	71.3247	14.4158	19.8359
1019	ENSG00000078246	TULP3	48.7281	-0.459322	0.679736	-0.675736	0.499209	0.975317	53.8533	67.6878	42.6549	34.5978	44.8464
1020	ENSG00000078269	SYNJ2	93.2385	-0.385404	0.568848	-0.677518	0.498077	0.975317	70.8596	82.0458	155.236	77.8451	80.2061
1021	ENSG00000078328	RBFOX1	5.73211	-5.82129	2.44896	-2.37704	0.017452	0.975317	17.0063	10.2557	1.39852	0	0
1022	ENSG00000078369	GNB1	1608.34	-0.444719	0.355869	-1.24967	0.21142	0.975317	2312.86	1980.38	1105.53	1441.58	1201.37
1023	ENSG00000078399	HOXA9	2.51843	0.86391	3.04664	0.283561	0.776747	0.975317	0	0	5.59409	0.96105	6.03702
1024	ENSG00000078401	EDN1	138.555	-1.28562	0.601688	-2.13668	0.032624	0.975317	259.346	225.626	59.4372	75.923	72.4442
1025	ENSG00000078403	MLLT10	59.7829	-0.803025	0.693818	-1.1574	0.247109	0.975317	119.044	58.4576	39.1586	45.1694	37.0846
1026	ENSG00000078487	ZCWPW1	2.41481	5.03029	3.70891	1.35627	0.175012	0.975317	0	0	0	0	12.074
1027	ENSG00000078589	P2RY10	0.172486	1.27694	4.55777	0.280167	0.779349	0.975317	0	0	0	0	0.862431
1028	ENSG00000078618	NRDC	395.869	-0.376489	0.346434	-1.08675	0.277145	0.975317	415.237	462.533	430.046	291.198	380.332
1029	ENSG00000078668	VDAC3	140.835	-0.317172	0.600898	-0.527831	0.597617	0.975317	282.021	107.685	69.9261	97.0661	147.476
1030	ENSG00000078687	TNRC6C	83.2612	-0.165617	0.533842	-0.310236	0.756381	0.975317	83.6143	85.1225	92.3025	75.923	79.3437
1031	ENSG00000078699	CBFA2T2	18.0149	0.93804	1.16893	0.802476	0.422277	0.975317	24.0923	3.07672	12.5867	36.5199	13.7989
1032	ENSG00000078725	BRINP1	0.699261	-2.83731	4.47532	-0.63399	0.526088	0.975317	0	0	3.49631	0	0
1033	ENSG00000078747	ITCH	12.0109	1.58668	1.35111	1.17435	0.240256	0.975317	9.92034	1.02557	9.0904	20.1821	19.8359
1034	ENSG00000078795	PKD2L2	0.283438	-1.12159	4.56003	-0.245961	0.805712	0.975317	1.41719	0	0	0	0
1035	ENSG00000078808	SDF4	190.212	0.470924	0.460226	1.02324	0.306192	0.975317	155.891	124.094	213.974	168.184	288.915
1036	ENSG00000078900	TP73	1.13375	-3.4688	4.45146	-0.779251	0.435832	0.975317	5.66877	0	0	0	0
1037	ENSG00000078967	UBE2D4	4.20386	2.87978	2.2025	1.30751	0.191041	0.975317	0	2.05115	1.39852	11.5326	6.03702
1038	ENSG00000079101	CLUL1	0.19221	1.35581	4.55186	0.297858	0.765812	0.975317	0	0	0	0.96105	0
1039	ENSG00000079102	RUNX1T1	129.512	0.141091	0.549123	0.256939	0.797226	0.975317	158.725	118.966	95.7988	199.898	74.1691
1040	ENSG00000079112	CDH17	2.46137	-4.61534	3.8692	-1.19284	0.232932	0.975317	0	12.3069	0	0	0
1041	ENSG00000079134	THOC1	11.08	-0.578946	1.31249	-0.441105	0.659137	0.975317	18.4235	12.3069	7.69188	5.7663	11.2116
1042	ENSG00000079150	FKBP7	35.0463	-0.378202	0.775022	-0.487989	0.625558	0.975317	41.0986	46.1508	28.6697	31.7147	27.5978
1043	ENSG00000079156	OSBPL6	32.9867	0.53805	0.806053	0.667512	0.504445	0.975317	18.4235	37.9462	27.2712	44.2083	37.0846
1044	ENSG00000079215	SLC1A3	2.67401	-0.906666	3.34645	-0.270933	0.786442	0.975317	9.92034	0	0	0	3.44973
1045	ENSG00000079263	SP140	22.5224	-1.38043	1.2224	-1.12928	0.258781	0.975317	35.4298	45.1252	9.0904	22.1042	0.862431
1046	ENSG00000079308	TNS1	149.588	-0.278863	0.550386	-0.506669	0.612387	0.975317	265.015	139.478	79.0165	148.002	116.428
1047	ENSG00000079313	REXO1	4.64596	-0.723772	2.42161	-0.29888	0.765031	0.975317	0	12.3069	4.19557	6.72735	0
1048	ENSG00000079332	SAR1A	572.561	-0.245665	0.377106	-0.651449	0.514757	0.975317	710.013	743.54	379.699	527.616	501.935
1049	ENSG00000079337	RAPGEF3	1.64092	-4.03044	4.43734	-0.908301	0.363719	0.975317	0	8.20458	0	0	0
1050	ENSG00000079387	SENP1	51.0193	-0.824712	0.708648	-1.16378	0.244512	0.975317	35.4298	72.8157	76.9188	25.9484	43.984
1051	ENSG00000079432	CIC	589.572	-0.82217	0.383758	-2.14242	0.0321598	0.975317	967.942	716.875	456.618	445.927	360.496
1052	ENSG00000079435	LIPE	0.657311	1.85884	4.41038	0.42147	0.673412	0.975317	0	0	0.699261	0	2.58729
1053	ENSG00000079459	FDFT1	49.7001	-0.447619	0.783429	-0.571359	0.567757	0.975317	65.1908	18.4603	83.2121	30.7536	50.8835
1054	ENSG00000079462	PAFAH1B3	291.181	-0.190747	0.466851	-0.408581	0.682847	0.975317	425.158	348.695	146.146	280.627	255.28
1055	ENSG00000079482	OPHN1	9.44816	-0.422031	1.42218	-0.29675	0.766658	0.975317	5.66877	17.4347	8.39114	10.5716	5.17459
1056	ENSG00000079616	KIF22	27.0389	0.598613	0.954162	0.627371	0.530416	0.975317	19.8407	12.3069	34.9631	16.3379	51.7459
1057	ENSG00000079691	CARMIL1	18.8466	-1.74003	1.33525	-1.30315	0.192525	0.975317	43.9329	23.5882	11.1882	0	15.5238
1058	ENSG00000079739	PGM1	16.3973	-1.23369	3.24013	-0.380755	0.703385	0.975317	18.4235	0	45.452	0	18.1111
1059	ENSG00000079785	DDX1	422.385	0.250729	0.371935	0.674121	0.500234	0.975317	372.721	295.365	509.062	427.667	507.11
1060	ENSG00000079805	DNM2	61.0898	0.361763	0.634819	0.569868	0.568767	0.975317	51.0189	75.8924	37.7601	69.1956	71.5818
1061	ENSG00000079819	EPB41L2	162.242	0.404536	0.471078	0.858745	0.390481	0.975317	102.038	175.373	153.138	146.08	234.581
1062	ENSG00000079841	RIMS1	3.33929	1.06367	3.06511	0.347025	0.728573	0.975317	7.08596	0	0	9.6105	0
1063	ENSG00000079931	MOXD1	29.3941	0.633437	0.861728	0.735078	0.462292	0.975317	12.7547	27.6905	31.4668	42.2862	32.7724
1064	ENSG00000079950	STX7	33.7162	-0.468516	1.05332	-0.444798	0.656466	0.975317	2.83438	55.3809	55.2417	41.3252	13.7989
1065	ENSG00000079974	RABL2B	18.8002	-0.639951	1.00841	-0.634613	0.525681	0.975317	18.4235	23.5882	23.7749	14.4158	13.7989
1066	ENSG00000079999	KEAP1	48.5643	1.39924	0.687198	2.03615	0.0417352	0.975317	28.3438	26.6649	32.8653	98.0271	56.9205
1067	ENSG00000080007	DDX43	0.699261	-2.83731	4.47532	-0.63399	0.526088	0.975317	0	0	3.49631	0	0
1068	ENSG00000080298	RFX3	9.41254	-0.803171	1.60294	-0.501062	0.616328	0.975317	1.41719	27.6905	4.89483	9.6105	3.44973
1069	ENSG00000080345	RIF1	251.297	-0.345657	0.406881	-0.849528	0.395587	0.975317	236.671	279.981	306.976	268.133	164.724
1070	ENSG00000080493	SLC4A4	49.1906	-0.590097	0.727701	-0.810905	0.41742	0.975317	36.847	90.2504	43.3542	29.7926	45.7089
1071	ENSG00000080503	SMARCA2	850.802	-0.673311	0.358771	-1.87672	0.0605569	0.975317	1217.37	1132.23	651.012	691.956	561.443
1072	ENSG00000080546	SESN1	18.3786	-1.60751	1.22661	-1.31053	0.190016	0.975317	12.7547	27.6905	34.9631	0.96105	15.5238
1073	ENSG00000080561	MID2	20.2746	-0.465522	1.01127	-0.460333	0.645277	0.975317	17.0063	31.7928	19.5793	10.5716	22.4232
1074	ENSG00000080573	COL5A3	9.63572	0.609573	1.64601	0.370333	0.711135	0.975317	15.5891	0	8.39114	17.2989	6.89945
1075	ENSG00000080603	SRCAP	0.559409	-2.52373	4.49154	-0.561885	0.574194	0.975317	0	0	2.79705	0	0
1076	ENSG00000080608	PUM3	347.538	0.126236	0.361929	0.348786	0.72725	0.975317	327.371	387.666	290.893	407.485	324.274
1077	ENSG00000080802	CNOT4	34.3294	0.970562	0.899219	1.07934	0.280437	0.975317	28.3438	10.2557	35.6623	74.9619	22.4232
1078	ENSG00000080819	CPOX	26.5964	0.467883	0.977542	0.478633	0.6322	0.975317	41.0986	21.537	6.99261	37.481	25.8729
1079	ENSG00000080823	MOK	44.334	0.527772	0.761985	0.692627	0.488543	0.975317	22.6751	31.7928	58.0387	72.0788	37.0846
1080	ENSG00000080824	HSP90AA1	7160.22	0.379848	0.330445	1.14951	0.250348	0.975317	5425.01	5859.1	7885.57	10617.7	6013.73
1081	ENSG00000080839	RBL1	58.8533	0.456859	0.656317	0.696095	0.486369	0.975317	75.1112	32.8183	46.1513	63.4293	76.7564
1082	ENSG00000080845	DLGAP4	904.048	-0.646171	0.360243	-1.79371	0.0728593	0.975317	1437.03	1029.68	704.156	711.177	638.199
1083	ENSG00000081014	AP4E1	17.5515	0.626482	1.31033	0.478109	0.632572	0.975317	0	18.4603	24.4741	24.9873	19.8359
1084	ENSG00000081019	RSBN1	27.6463	1.40633	0.900953	1.56094	0.118538	0.975317	8.50315	21.537	19.5793	56.702	31.91
1085	ENSG00000081052	COL4A4	5.20287	-3.06151	2.77331	-1.10392	0.269628	0.975317	24.0923	0	0	1.9221	0
1086	ENSG00000081059	TCF7	63.7458	-0.405144	0.74931	-0.540689	0.588722	0.975317	46.7673	27.6905	137.055	61.5072	45.7089
1087	ENSG00000081087	OSTM1	115.89	0.483804	0.665088	0.727429	0.466963	0.975317	51.0189	45.1252	202.786	111.482	169.037
1088	ENSG00000081138	CDH7	0.566877	-2.44333	4.49628	-0.543412	0.586846	0.975317	2.83438	0	0	0	0
1089	ENSG00000081154	PCNP	123.94	0.45087	0.494273	0.912188	0.36167	0.975317	87.8659	101.532	134.258	178.755	117.291
1090	ENSG00000081177	EXD2	7.07106	0.915501	1.56818	0.583797	0.559357	0.975317	5.66877	5.12786	4.89483	6.72735	12.9365
1091	ENSG00000081181	ARG2	3.91807	5.72594	2.7114	2.1118	0.0347032	0.975317	0	0	0	14.4158	5.17459
1092	ENSG00000081189	MEF2C	134.954	-0.856173	0.507528	-1.68695	0.0916133	0.975317	187.069	209.217	97.1973	94.1829	87.1056
1093	ENSG00000081237	PTPRC	1.54958	-3.94408	4.1115	-0.959279	0.337418	0.975317	4.25158	0	3.49631	0	0
1094	ENSG00000081307	UBA5	26.1369	-0.73999	1.03286	-0.716448	0.473715	0.975317	29.761	6.15344	57.3394	20.1821	17.2486
1095	ENSG00000081320	STK17B	35.7467	0.515902	0.777346	0.663671	0.506901	0.975317	19.8407	39.9973	31.4668	45.1694	42.2591
1096	ENSG00000081377	CDC14B	22.7794	-0.646486	0.990752	-0.652521	0.514065	0.975317	43.9329	12.3069	23.7749	19.221	14.6613
1097	ENSG00000081386	ZNF510	2.53134	1.2085	3.33917	0.361915	0.717416	0.975317	0	0	4.89483	0	7.76188
1098	ENSG00000081479	LRP2	0.850315	-3.04507	4.46632	-0.681786	0.495375	0.975317	4.25158	0	0	0	0
1099	ENSG00000081692	JMJD4	43.6974	1.43225	0.749447	1.91107	0.0559957	0.975317	31.1782	15.3836	31.4668	91.2998	49.1586
1100	ENSG00000081760	AACS	85.3406	0.320687	0.646651	0.49592	0.619951	0.975317	29.761	84.097	118.175	115.326	79.3437
1101	ENSG00000081791	DELE1	22.3732	0.697735	1.03857	0.67182	0.501698	0.975317	19.8407	5.12786	28.6697	21.1431	37.0846
1102	ENSG00000081803	CADPS2	1.65024	-4.04411	4.01	-1.00851	0.313212	0.975317	0	6.15344	2.09778	0	0
1103	ENSG00000081913	PHLPP1	24.8123	-0.793054	0.933866	-0.849216	0.395761	0.975317	43.9329	16.4092	29.369	15.3768	18.9735
1104	ENSG00000081923	ATP8B1	60.1973	1.19923	0.642401	1.86679	0.0619309	0.975317	49.6017	31.7928	37.7601	116.287	65.5448
1105	ENSG00000082126	MPP4	3.89441	-3.78246	2.85496	-1.32487	0.185214	0.975317	4.25158	14.358	0	0	0.862431
1106	ENSG00000082153	BZW1	143.128	0.285749	0.538099	0.531035	0.595395	0.975317	70.8596	111.787	211.177	144.158	177.661
1107	ENSG00000082196	C1QTNF3	1.97287	-4.29142	3.74983	-1.14443	0.252445	0.975317	5.66877	0	4.19557	0	0
1108	ENSG00000082212	ME2	39.0356	-0.75096	0.765722	-0.980721	0.32673	0.975317	36.847	59.4832	43.3542	36.5199	18.9735
1109	ENSG00000082258	CCNT2	17.2683	0.442228	1.17933	0.374983	0.707673	0.975317	4.25158	20.5115	20.2786	32.6757	8.62431
1110	ENSG00000082293	COL19A1	6.39123	-4.52124	2.26088	-1.99977	0.0455253	0.975317	7.08596	20.5115	3.49631	0	0.862431
1111	ENSG00000082397	EPB41L3	2.42915	1.83074	3.39238	0.539662	0.58943	0.975317	0	0	3.49631	8.64945	0
1112	ENSG00000082438	COBLL1	13.4655	1.11299	1.47082	0.756717	0.44922	0.975317	8.50315	0	18.8801	27.8705	12.074
1113	ENSG00000082458	DLG3	9.81854	-1.46807	1.71512	-0.855958	0.392021	0.975317	5.66877	29.7416	4.19557	0	9.48675
1114	ENSG00000082482	KCNK2	79.351	-1.01993	0.659821	-1.54577	0.12216	0.975317	102.038	124.094	72.7232	21.1431	76.7564
1115	ENSG00000082497	SERTAD4	6.3456	-1.75363	1.89733	-0.924265	0.355348	0.975317	12.7547	8.20458	5.59409	0	5.17459
1116	ENSG00000082512	TRAF5	14.0423	-0.813965	1.48662	-0.547528	0.584016	0.975317	0	14.358	36.3616	13.4547	6.03702
1117	ENSG00000082515	MRPL22	8.84371	1.55515	1.52157	1.02207	0.306749	0.975317	9.92034	1.02557	4.19557	14.4158	14.6613
1118	ENSG00000082516	GEMIN5	24.402	-0.58697	1.071	-0.548056	0.583653	0.975317	29.761	31.7928	23.0756	2.88315	34.4973
1119	ENSG00000082701	GSK3B	364.184	-0.344626	0.431636	-0.798417	0.424628	0.975317	554.122	418.434	222.365	351.744	274.253
1120	ENSG00000082781	ITGB5	160.954	0.190646	0.509264	0.374356	0.708139	0.975317	82.1971	193.833	180.409	133.586	214.745
1121	ENSG00000082805	ERC1	219.479	-0.130295	0.450326	-0.289335	0.772325	0.975317	143.136	235.882	302.081	241.224	175.074
1122	ENSG00000082898	XPO1	159.325	-0.154057	0.465323	-0.331074	0.740588	0.975317	211.162	153.836	133.559	181.638	116.428
1123	ENSG00000082929	LINC01587	0.19221	1.35581	4.55186	0.297858	0.765812	0.975317	0	0	0	0.96105	0
1124	ENSG00000083067	TRPM3	0.172486	1.27694	4.55777	0.280167	0.779349	0.975317	0	0	0	0	0.862431
1125	ENSG00000083093	PALB2	4.24791	-0.716936	2.30142	-0.311519	0.755406	0.975317	0	12.3069	2.79705	0.96105	5.17459
1126	ENSG00000083097	DOP1A	45.4239	-0.5632	0.94137	-0.598277	0.549655	0.975317	56.6877	69.7389	30.0682	66.3125	4.31216
1127	ENSG00000083099	LYRM2	238.36	0.352803	0.481849	0.732186	0.464055	0.975317	111.958	194.859	335.645	285.432	263.904
1128	ENSG00000083123	BCKDHB	3.92735	-2.63038	2.41153	-1.09075	0.275383	0.975317	7.08596	9.23015	1.39852	1.9221	0
1129	ENSG00000083223	TUT7	176.641	-0.427039	0.454288	-0.940018	0.347209	0.975317	177.149	158.964	253.832	176.833	116.428
1130	ENSG00000083290	ULK2	11.5966	-0.452305	1.69828	-0.26633	0.789985	0.975317	17.0063	1.02557	20.9778	0	18.9735
1131	ENSG00000083312	TNPO1	622.174	-0.0907973	0.332635	-0.272964	0.784881	0.975317	576.797	549.707	785.97	626.605	571.792
1132	ENSG00000083457	ITGAE	7.77082	1.38773	1.72423	0.804841	0.420912	0.975317	0	4.10229	9.78966	16.3379	8.62431
1133	ENSG00000083520	DIS3	84.5028	-0.521331	0.555883	-0.937842	0.348325	0.975317	75.1112	96.4038	116.777	55.7409	78.4813
1134	ENSG00000083544	TDRD3	7.24939	0.704617	1.75965	0.400429	0.688841	0.975317	0	10.2557	6.99261	8.64945	10.3492
1135	ENSG00000083635	NUFIP1	9.09359	2.92025	1.63435	1.78679	0.0739707	0.975317	5.66877	0	2.09778	14.4158	23.2857
1136	ENSG00000083642	PDS5B	100.99	0.197823	0.502118	0.393978	0.693597	0.975317	110.541	91.276	84.6106	112.443	106.079
1137	ENSG00000083750	RRAGB	18.381	0.716539	1.3897	0.515606	0.60613	0.975317	0	31.7928	11.8874	41.3252	6.89945
1138	ENSG00000083799	CYLD	66.959	0.403385	0.643726	0.626642	0.530894	0.975317	58.1049	32.8183	86.7084	69.1956	87.968
1139	ENSG00000083812	ZNF324	11.128	0.411359	1.56736	0.262453	0.792972	0.975317	0	17.4347	11.8874	21.1431	5.17459
1140	ENSG00000083814	ZNF671	2.79923	5.2433	3.13419	1.67293	0.0943402	0.975317	0	0	0	1.9221	12.074
1141	ENSG00000083817	ZNF416	5.55679	2.56363	1.98249	1.29313	0.195965	0.975317	2.83438	0	2.79705	5.7663	16.3862
1142	ENSG00000083828	ZNF586	3.20337	5.43722	2.92855	1.85662	0.0633651	0.975317	0	0	0	4.80525	11.2116
1143	ENSG00000083838	ZNF446	0.344973	2.22873	4.4526	0.500545	0.616691	0.975317	0	0	0	0	1.72486
1144	ENSG00000083844	ZNF264	54.2635	-0.350437	0.855964	-0.409406	0.682242	0.975317	11.3375	116.915	49.6476	61.5072	31.91
1145	ENSG00000083845	RPS5	1407.38	0.50466	0.287094	1.75782	0.0787781	0.975317	1244.29	1294.27	1078.26	1694.33	1725.73
1146	ENSG00000083857	FAT1	113.241	0.327512	0.477872	0.685356	0.493119	0.975317	93.5347	109.736	104.889	127.82	130.227
1147	ENSG00000083896	YTHDC1	437.209	-0.106416	0.372413	-0.285748	0.775071	0.975317	508.772	534.323	307.675	416.135	419.142
1148	ENSG00000083937	CHMP2B	67.8069	-0.49635	0.676875	-0.733297	0.463377	0.975317	36.847	65.6367	127.266	48.0525	61.2326
1149	ENSG00000084070	SMAP2	120.352	-0.462179	0.479283	-0.964313	0.334889	0.975317	154.474	141.529	109.784	102.832	93.1426
1150	ENSG00000084072	PPIE	30.8173	1.77859	0.933122	1.90606	0.0566419	0.975317	14.1719	7.17901	25.1734	81.6893	25.8729
1151	ENSG00000084073	ZMPSTE24	109.457	0.350389	0.521067	0.672445	0.5013	0.975317	62.3564	118.966	113.98	119.17	132.814
1152	ENSG00000084092	NOA1	18.7195	-0.437335	1.4094	-0.310299	0.756334	0.975317	48.1845	0	14.6845	22.1042	8.62431
1153	ENSG00000084093	REST	169.739	-0.120086	0.479945	-0.250207	0.802428	0.975317	131.799	133.324	260.125	176.833	146.613
1154	ENSG00000084112	SSH1	101.505	-0.405536	0.516416	-0.785289	0.432284	0.975317	104.872	91.276	141.251	77.8451	92.2802
1155	ENSG00000084234	APLP2	795.524	0.297532	0.307846	0.966498	0.333795	0.975317	693.007	743.54	749.608	791.905	999.558
1156	ENSG00000084453	SLCO1A2	0.139852	-1.09577	4.56092	-0.240253	0.810134	0.975317	0	0	0.699261	0	0
1157	ENSG00000084463	WBP11	138.999	0.548645	0.510924	1.07383	0.282899	0.975317	158.725	67.6878	125.867	146.08	196.634
1158	ENSG00000084623	EIF3I	275.081	0.622063	0.466148	1.33447	0.182048	0.975317	117.627	214.345	345.435	364.238	333.761
1159	ENSG00000084652	TXLNA	180.685	-0.340911	0.425572	-0.801065	0.423094	0.975317	233.837	196.91	161.529	166.262	144.888
1160	ENSG00000084693	AGBL5	13.3123	1.12654	1.24012	0.908412	0.36366	0.975317	4.25158	7.17901	15.3838	25.9484	13.7989
1161	ENSG00000084710	EFR3B	3.26227	-1.80962	2.86866	-0.630823	0.528156	0.975317	1.41719	12.3069	0	0	2.58729
1162	ENSG00000084731	KIF3C	30.6209	-0.612227	1.34606	-0.454828	0.649233	0.975317	92.1175	0	14.6845	39.4031	6.89945
1163	ENSG00000084733	RAB10	204.723	0.313895	0.395508	0.79365	0.427399	0.975317	191.321	173.322	195.094	225.847	238.031
1164	ENSG00000084754	HADHA	356.427	-0.366239	0.361647	-1.0127	0.311205	0.975317	368.47	330.234	475.498	301.77	306.163
1165	ENSG00000084764	MAPRE3	66.9921	-0.625048	0.666577	-0.937698	0.348399	0.975317	109.124	83.0714	41.9557	66.3125	34.4973
1166	ENSG00000084774	CAD	29.9472	-1.29216	1.09042	-1.18501	0.236014	0.975317	22.6751	48.2019	46.8505	0.96105	31.0475
1167	ENSG00000085063	CD59	659.787	1.04469	0.395559	2.64104	0.00826513	0.975317	369.887	332.286	685.276	776.528	1134.96
1168	ENSG00000085117	CD82	124.579	0.620159	0.558928	1.10955	0.267193	0.975317	45.3501	149.734	111.882	162.417	153.513
1169	ENSG00000085185	BCORL1	33.8673	-0.684158	0.858459	-0.796961	0.425473	0.975317	42.5158	60.5088	16.7823	28.8315	20.6984
1170	ENSG00000085224	ATRX	353.024	-0.40769	0.36326	-1.12231	0.261731	0.975317	375.556	398.948	399.978	351.744	238.894
1171	ENSG00000085231	AK6	19.7505	0.363334	1.02231	0.355405	0.722286	0.975317	21.2579	10.2557	21.6771	15.3768	30.1851
1172	ENSG00000085274	MYNN	10.718	0.700095	1.43987	0.486222	0.62681	0.975317	19.8407	4.10229	2.09778	16.3379	11.2116
1173	ENSG00000085276	MECOM	29.0157	-0.44039	0.999015	-0.440824	0.65934	0.975317	36.847	54.3554	6.29335	18.26	29.3227
1174	ENSG00000085377	PREP	139.659	0.373791	0.616907	0.605911	0.544574	0.975317	138.885	190.757	45.452	224.886	98.3172
1175	ENSG00000085382	HACE1	8.85743	-0.738546	1.78099	-0.414682	0.678375	0.975317	4.25158	0	27.2712	6.72735	6.03702
1176	ENSG00000085415	SEH1L	21.1324	1.92697	0.986248	1.95383	0.0507208	0.975317	8.50315	7.17901	13.9852	34.5978	41.3967
1177	ENSG00000085433	WDR47	41.6077	-0.432608	0.767235	-0.563853	0.572854	0.975317	56.6877	53.3298	29.369	47.0915	21.5608
1178	ENSG00000085449	WDFY1	19.4231	0.604785	1.13962	0.530692	0.595632	0.975317	17.0063	3.07672	27.9705	32.6757	16.3862
1179	ENSG00000085465	OVGP1	0.419557	-2.12174	4.518	-0.46962	0.638627	0.975317	0	0	2.09778	0	0
1180	ENSG00000085491	SLC25A24	55.2826	0.697789	0.790432	0.882794	0.377348	0.975317	15.5891	29.7416	86.7084	53.8188	90.5553
1181	ENSG00000085511	MAP3K4	66.3101	-0.304284	0.731311	-0.41608	0.677352	0.975317	111.958	24.6137	79.0165	37.481	78.4813
1182	ENSG00000085563	ABCB1	5.74518	-1.06806	2.25036	-0.474618	0.635059	0.975317	11.3375	0	10.4889	0	6.89945
1183	ENSG00000085644	ZNF213	1.4742	1.83987	3.74512	0.49127	0.623236	0.975317	0	0	2.09778	0.96105	4.31216
1184	ENSG00000085662	AKR1B1	177.482	0.870019	0.539508	1.61262	0.106828	0.975317	63.7736	109.736	225.162	207.587	281.153
1185	ENSG00000085719	CPNE3	87.0999	-0.271034	0.552572	-0.490495	0.623784	0.975317	103.455	68.7134	108.386	64.3904	90.5553
1186	ENSG00000085721	RRN3	13.204	1.05221	1.25218	0.840305	0.400737	0.975317	4.25158	16.4092	6.99261	12.4937	25.8729
1187	ENSG00000085733	CTTN	107.682	0.58113	0.589152	0.986383	0.323945	0.975317	90.7003	69.7389	109.085	65.3514	203.534
1188	ENSG00000085760	MTIF2	76.6417	0.177484	0.570572	0.311064	0.755752	0.975317	85.0315	68.7134	65.0313	64.3904	100.042
1189	ENSG00000085788	DDHD2	11.162	0.847133	1.54495	0.548324	0.583469	0.975317	9.92034	0	15.3838	11.5326	18.9735
1190	ENSG00000085831	TTC39A	19.9035	-0.608202	1.0685	-0.569211	0.569213	0.975317	43.9329	14.358	11.1882	15.3768	14.6613
1191	ENSG00000085832	EPS15	57.9847	0.629103	0.616706	1.0201	0.307681	0.975317	43.9329	53.3298	45.452	73.0398	74.1691
1192	ENSG00000085840	ORC1	6.0057	1.06682	2.22046	0.480451	0.630907	0.975317	12.7547	0	0	8.64945	8.62431
1193	ENSG00000085871	MGST2	7.00663	-0.529489	2.19193	-0.241562	0.809119	0.975317	24.0923	0	0	5.7663	5.17459
1194	ENSG00000085982	USP40	66.5317	-0.165276	0.593782	-0.278345	0.780748	0.975317	80.7799	70.7645	57.3394	54.7799	68.9945
1195	ENSG00000085998	POMGNT1	18.0907	1.55084	1.05078	1.4759	0.139971	0.975317	8.50315	12.3069	9.78966	20.1821	39.6718
1196	ENSG00000086015	MAST2	280.566	-0.740198	0.51324	-1.44221	0.149244	0.975317	452.084	424.587	126.566	229.691	169.899
1197	ENSG00000086061	DNAJA1	148.988	0.244522	0.489229	0.49981	0.617209	0.975317	202.658	95.3783	118.874	171.067	156.963
1198	ENSG00000086062	B4GALT1	41.9119	0.747018	0.766677	0.974358	0.329879	0.975317	28.3438	18.4603	51.7453	48.0525	62.9575
1199	ENSG00000086102	NFX1	69.7627	-1.34746	0.582909	-2.31162	0.0207986	0.975317	86.4487	89.2248	100.694	33.6368	38.8094
1200	ENSG00000086189	DIMT1	2.01138	2.41409	3.27533	0.737054	0.461089	0.975317	0	0	2.09778	1.9221	6.03702
1201	ENSG00000086200	IPO11	13.5268	1.37561	1.2569	1.09445	0.273757	0.975317	4.25158	4.10229	16.083	25.9484	17.2486
1202	ENSG00000086232	EIF2AK1	59.5103	-0.630034	0.640537	-0.983603	0.325311	0.975317	63.7736	82.0458	62.2343	31.7147	57.7829
1203	ENSG00000086289	EPDR1	50.9603	-0.420696	0.690989	-0.608831	0.542636	0.975317	36.847	79.9947	53.1439	36.5199	48.2962
1204	ENSG00000086475	SEPHS1	12.3918	0.64337	1.28944	0.498955	0.617811	0.975317	4.25158	13.3324	12.5867	24.0263	7.76188
1205	ENSG00000086504	MRPL28	52.3211	-0.390279	0.708877	-0.550559	0.581936	0.975317	28.3438	63.5855	81.1143	39.4031	49.1586
1206	ENSG00000086506	HBQ1	1.64092	-4.03044	4.43734	-0.908301	0.363719	0.975317	0	8.20458	0	0	0
1207	ENSG00000086544	ITPKC	6.99017	2.69386	2.10582	1.27924	0.200811	0.975317	0	0	6.29335	1.9221	26.7354
1208	ENSG00000086589	RBM22	133.151	0.233768	0.57242	0.408385	0.682991	0.975317	192.738	52.3042	128.664	123.014	169.037
1209	ENSG00000086619	ERO1B	23.1239	-0.683431	1.20211	-0.568528	0.569677	0.975317	18.4235	5.12786	58.0387	3.8442	30.1851
1210	ENSG00000086666	ZFAND6	69.8357	0.229566	0.592733	0.387301	0.698534	0.975317	65.1908	50.2531	80.4151	65.3514	87.968
1211	ENSG00000086696	HSD17B2	11.7473	1.27758	1.44623	0.88339	0.377026	0.975317	17.0063	5.12786	0.699261	22.1042	13.7989
1212	ENSG00000086712	TXLNG	46.3183	0.571254	0.801346	0.712867	0.475928	0.975317	15.5891	69.7389	30.7675	74.9619	40.5343
1213	ENSG00000086758	HUWE1	580.01	-0.429316	0.366234	-1.17225	0.241098	0.975317	739.774	757.898	442.632	544.915	414.83
1214	ENSG00000086827	ZW10	17.0861	-0.658072	1.07015	-0.614933	0.538599	0.975317	18.4235	27.6905	13.9852	11.5326	13.7989
1215	ENSG00000086848	ALG9	6.92142	-1.11054	1.59533	-0.696121	0.486353	0.975317	8.50315	10.2557	7.69188	3.8442	4.31216
1216	ENSG00000086967	MYBPC2	1.41719	-3.79604	4.44258	-0.854466	0.392847	0.975317	7.08596	0	0	0	0
1217	ENSG00000086991	NOX4	1.53768	4.37567	4.35644	1.00441	0.315179	0.975317	0	0	0	7.6884	0
1218	ENSG00000087053	MTMR2	34.5856	-0.245588	0.806878	-0.304369	0.760847	0.975317	21.2579	45.1252	44.0535	37.481	25.0105
1219	ENSG00000087074	PPP1R15A	108.041	0.574913	0.504554	1.13945	0.254517	0.975317	103.455	99.4806	68.5276	148.002	120.74
1220	ENSG00000087076	HSD17B14	9.79543	0.642107	1.7507	0.366771	0.71379	0.975317	0	11.2813	12.5867	0.96105	24.1481
1221	ENSG00000087077	TRIP6	77.3745	1.04043	0.559724	1.85883	0.0630519	0.975317	46.7673	66.6622	49.6476	113.404	110.391
1222	ENSG00000087086	FTL	3557.78	0.403227	0.317049	1.27181	0.20344	0.975317	2548.11	3091.08	3813.77	3325.23	5010.73
1223	ENSG00000087087	SRRT	373.935	-0.438961	0.364451	-1.20445	0.228417	0.975317	418.072	462.533	372.706	367.121	249.243
1224	ENSG00000087088	BAX	47.2715	0.40672	0.938084	0.433564	0.664605	0.975317	4.25158	33.8439	86.7084	70.1567	41.3967
1225	ENSG00000087095	NLK	83.6676	-0.519302	0.62608	-0.829449	0.40685	0.975317	106.289	133.324	46.1513	81.6893	50.8835
1226	ENSG00000087111	PIGS	86.981	-0.601104	0.598466	-1.00441	0.315182	0.975317	147.388	96.4038	58.738	79.7672	52.6083
1227	ENSG00000087116	ADAMTS2	146.85	-0.252705	0.566804	-0.445842	0.655712	0.975317	265.015	137.427	69.2269	138.391	124.19
1228	ENSG00000087152	ATXN7L3	23.694	-1.24664	1.15137	-1.08274	0.278924	0.975317	18.4235	32.8183	41.2564	0.96105	25.0105
1229	ENSG00000087157	PGS1	20.2126	-0.549178	1.08236	-0.507389	0.611882	0.975317	17.0063	44.0996	8.39114	13.4547	18.1111
1230	ENSG00000087191	PSMC5	768.304	-0.301985	0.310892	-0.971348	0.331375	0.975317	950.936	814.305	728.63	677.54	670.109
1231	ENSG00000087206	UIMC1	37.5821	-0.451236	0.769279	-0.586569	0.557493	0.975317	25.5095	50.2531	50.3468	30.7536	31.0475
1232	ENSG00000087237	CETP	0.19221	1.35581	4.55186	0.297858	0.765812	0.975317	0	0	0	0.96105	0
1233	ENSG00000087245	MMP2	932.887	-0.70945	0.333653	-2.12631	0.0334775	0.975317	1439.87	996.857	877.573	710.216	639.924
1234	ENSG00000087253	LPCAT2	14.4737	1.07079	1.15636	0.925998	0.354447	0.975317	9.92034	6.15344	13.9852	17.2989	25.0105
1235	ENSG00000087258	GNAO1	5.36335	-2.47466	2.12525	-1.16441	0.24426	0.975317	15.5891	2.05115	6.29335	2.88315	0
1236	ENSG00000087263	OGFOD1	219.653	0.695183	0.467411	1.48731	0.136934	0.975317	111.958	143.58	271.313	298.887	272.528
1237	ENSG00000087266	SH3BP2	74.9498	1.88217	0.726888	2.58935	0.00961582	0.975317	25.5095	20.5115	61.535	208.548	58.6453
1238	ENSG00000087269	NOP14	157.219	0.561868	0.459021	1.22406	0.220931	0.975317	126.13	149.734	120.273	245.068	144.888
1239	ENSG00000087274	ADD1	301.725	0.318501	0.39058	0.815456	0.414811	0.975317	351.464	267.674	205.583	361.355	322.549
1240	ENSG00000087299	L2HGDH	17.6853	-1.84034	1.19592	-1.53885	0.12384	0.975317	11.3375	51.2786	11.8874	9.6105	4.31216
1241	ENSG00000087302	RTRAF	56.7865	0.400734	0.641534	0.624649	0.532201	0.975317	39.6814	50.2531	60.8357	53.8188	79.3437
1242	ENSG00000087303	NID2	0.484825	1.27618	4.4514	0.286693	0.774348	0.975317	0	0	0.699261	0	1.72486
1243	ENSG00000087338	GMCL1	37.2789	0.293233	0.90662	0.323436	0.746365	0.975317	25.5095	23.5882	53.1439	72.0788	12.074
1244	ENSG00000087365	SF3B2	978.331	0.0777068	0.293496	0.264763	0.791192	0.975317	948.101	998.908	924.424	1062.92	957.299
1245	ENSG00000087448	KLHL42	108.746	0.326032	0.597262	0.545878	0.58515	0.975317	42.5158	149.734	103.491	97.0661	150.926
1246	ENSG00000087460	GNAS	141.055	0.458155	0.518312	0.883936	0.376731	0.975317	63.7736	161.015	142.649	148.963	188.872
1247	ENSG00000087502	ERGIC2	25.135	0.621708	0.931574	0.667374	0.504534	0.975317	22.6751	11.2813	27.9705	41.3252	22.4232
1248	ENSG00000087510	TFAP2C	26.1721	-1.08092	0.90954	-1.18842	0.234666	0.975317	38.2642	41.0229	20.2786	19.221	12.074
1249	ENSG00000087586	AURKA	105.824	0.538787	0.508372	1.05983	0.289223	0.975317	73.694	104.608	90.2047	152.807	107.804
1250	ENSG00000087842	PIR	9.82998	0.552277	1.57063	0.351628	0.725117	0.975317	11.3375	3.07672	10.4889	0.96105	23.2857
1251	ENSG00000087884	AAMDC	34.6393	-1.74064	0.850195	-2.04734	0.0406246	0.975317	49.6017	69.7389	25.1734	10.5716	18.1111
1252	ENSG00000087995	METTL2A	31.9196	0.426422	0.816567	0.522213	0.601522	0.975317	18.4235	27.6905	37.7601	40.3641	35.3597
1253	ENSG00000088002	SULT2B1	3.6847	-5.18082	3.40579	-1.52118	0.128214	0.975317	18.4235	0	0	0	0
1254	ENSG00000088035	ALG6	8.15347	-0.78992	1.81226	-0.435875	0.662928	0.975317	21.2579	4.10229	4.19557	0	11.2116
1255	ENSG00000088038	CNOT3	10.3261	0.554889	1.59022	0.348939	0.727135	0.975317	9.92034	0	16.083	14.4158	11.2116
1256	ENSG00000088179	PTPN4	13.749	1.48697	1.43364	1.0372	0.299642	0.975317	0	15.3836	8.39114	9.6105	35.3597
1257	ENSG00000088205	DDX18	157.753	0.443707	0.496641	0.893417	0.371634	0.975317	103.455	97.4294	211.876	193.171	182.835
1258	ENSG00000088247	KHSRP	716.427	0.937567	0.347532	2.69779	0.00698014	0.975317	392.562	486.121	692.968	1010.06	1000.42
1259	ENSG00000088256	GNA11	62.1087	0.668039	0.694806	0.961477	0.336313	0.975317	59.5221	68.7134	23.0756	55.7409	103.492
1260	ENSG00000088280	ASAP3	6.70896	-0.490784	1.86711	-0.262857	0.792661	0.975317	0	16.4092	6.29335	4.80525	6.03702
1261	ENSG00000088305	DNMT3B	4.82774	-0.721207	2.18954	-0.329387	0.741863	0.975317	9.92034	1.02557	6.29335	0	6.89945
1262	ENSG00000088325	TPX2	349.603	0.503815	0.347666	1.44913	0.1473	0.975317	303.279	319.979	275.509	443.044	406.205
1263	ENSG00000088340	FER1L4	0.615344	-2.6163	4.48639	-0.583164	0.559783	0.975317	0	3.07672	0	0	0
1264	ENSG00000088356	PDRG1	31.9776	0.471902	0.990641	0.47636	0.633818	0.975317	11.3375	58.4576	13.286	17.2989	59.5078
1265	ENSG00000088386	SLC15A1	1.13375	-3.4688	4.45146	-0.779251	0.435832	0.975317	5.66877	0	0	0	0
1266	ENSG00000088387	DOCK9	8.31443	0.82887	1.68382	0.492255	0.622539	0.975317	0	13.3324	5.59409	10.5716	12.074
1267	ENSG00000088448	ANKRD10	25.5694	-0.437779	0.979032	-0.447155	0.654763	0.975317	24.0923	21.537	39.8579	34.5978	7.76188
1268	ENSG00000088451	TGDS	3.1178	2.35232	2.83338	0.830215	0.406417	0.975317	1.41719	0	2.09778	0	12.074
1269	ENSG00000088543	C3orf18	4.3172	-2.12916	2.24415	-0.948763	0.342741	0.975317	4.25158	10.2557	4.19557	2.88315	0
1270	ENSG00000088682	COQ9	1.25867	-3.66929	4.44579	-0.825342	0.409178	0.975317	0	0	6.29335	0	0
1271	ENSG00000088756	ARHGAP28	3.4454	1.17268	2.47423	0.473958	0.63553	0.975317	0	6.15344	0.699261	8.64945	1.72486
1272	ENSG00000088808	PPP1R13B	4.90563	2.04975	2.28327	0.897727	0.369331	0.975317	0	0	6.29335	9.6105	8.62431
1273	ENSG00000088812	ATRN	16.6844	2.41147	1.37288	1.7565	0.0790039	0.975317	8.50315	0	9.78966	54.7799	10.3492
1274	ENSG00000088826	SMOX	34.8667	1.28793	1.16013	1.11016	0.266931	0.975317	15.5891	0	50.3468	39.4031	68.9945
1275	ENSG00000088833	NSFL1C	60.4636	-0.211321	0.764704	-0.276344	0.782284	0.975317	85.0315	19.4859	87.4077	33.6368	76.7564
1276	ENSG00000088836	SLC4A11	2.37605	-1.08315	3.09566	-0.349894	0.726418	0.975317	0	4.10229	4.89483	2.88315	0
1277	ENSG00000088854	DNAAF9	48.3782	-0.215332	0.902608	-0.238566	0.811442	0.975317	102.038	7.17901	44.7527	49.9746	37.947
1278	ENSG00000088876	ZNF343	5.71606	2.87706	2.01888	1.42508	0.154135	0.975317	0	4.10229	0.699261	4.80525	18.9735
1279	ENSG00000088888	MAVS	364.164	0.712153	0.504343	1.41204	0.157938	0.975317	137.468	212.294	518.852	555.487	396.718
1280	ENSG00000088930	XRN2	718.535	-0.321302	0.346689	-0.926773	0.354044	0.975317	962.273	820.458	560.808	675.618	573.517
1281	ENSG00000088970	KIZ	4.0399	-2.16482	2.57486	-0.840752	0.400487	0.975317	9.92034	0	7.69188	0	2.58729
1282	ENSG00000088986	DYNLL1	259.558	1.07307	0.399656	2.68498	0.00725351	0.975317	161.56	145.631	232.155	356.55	401.893
1283	ENSG00000088992	TESC	0.283438	-1.12159	4.56003	-0.245961	0.805712	0.975317	1.41719	0	0	0	0
1284	ENSG00000089009	RPL6	371.82	1.21514	0.434408	2.79722	0.00515438	0.975317	171.48	173.322	383.195	617.955	513.147
1285	ENSG00000089048	ESF1	231.452	-0.304742	0.417415	-0.730068	0.465348	0.975317	174.315	271.777	304.878	194.132	212.158
1286	ENSG00000089050	RBBP9	14.3524	-0.738813	1.4238	-0.518904	0.603828	0.975317	43.9329	4.10229	3.49631	3.8442	16.3862
1287	ENSG00000089053	ANAPC5	125.073	-0.509802	0.559531	-0.911123	0.36223	0.975317	68.0252	140.503	216.771	92.2608	107.804
1288	ENSG00000089057	SLC23A2	22.3459	0.434039	1.10362	0.393286	0.694108	0.975317	2.83438	18.4603	37.0609	32.6757	20.6984
1289	ENSG00000089060	SLC8B1	10.9064	0.437221	1.53876	0.284139	0.776304	0.975317	0	10.2557	18.1808	10.5716	15.5238
1290	ENSG00000089063	TMEM230	5.35293	0.501354	1.97759	0.253517	0.799869	0.975317	1.41719	1.02557	11.1882	1.9221	11.2116
1291	ENSG00000089091	DZANK1	2.71869	2.08594	2.63582	0.791382	0.428721	0.975317	1.41719	0	2.09778	5.7663	4.31216
1292	ENSG00000089094	KDM2B	70.5328	-0.494137	0.602537	-0.820094	0.412163	0.975317	107.707	56.4065	75.5202	50.9357	62.0951
1293	ENSG00000089123	TASP1	1.62517	2.6488	3.99345	0.663285	0.507148	0.975317	0	0	1.39852	6.72735	0
1294	ENSG00000089127	OAS1	1.62517	2.6488	3.99345	0.663285	0.507148	0.975317	0	0	1.39852	6.72735	0
1295	ENSG00000089154	GCN1	105.501	-0.406295	0.560701	-0.724619	0.468686	0.975317	69.4424	174.347	106.987	74.9619	101.767
1296	ENSG00000089157	RPLP0	536.621	0.852232	0.346203	2.46165	0.0138299	0.975317	426.575	379.462	411.865	570.864	894.341
1297	ENSG00000089177	KIF16B	25.2345	-0.28733	0.966373	-0.297328	0.766216	0.975317	48.1845	11.2813	22.3764	20.1821	24.1481
1298	ENSG00000089195	TRMT6	47.7789	0.263378	0.782162	0.336731	0.73632	0.975317	83.6143	26.6649	23.0756	45.1694	60.3702
1299	ENSG00000089199	CHGB	0.559409	-2.52373	4.49154	-0.561885	0.574194	0.975317	0	0	2.79705	0	0
1300	ENSG00000089220	PEBP1	383.805	0.590541	0.385836	1.53055	0.125881	0.975317	213.996	333.311	409.068	489.174	473.475
1301	ENSG00000089248	ERP29	313.83	-0.614678	0.418537	-1.46863	0.141932	0.975317	481.845	378.436	233.553	270.055	205.259
1302	ENSG00000089280	FUS	807.773	-0.140631	0.397386	-0.353889	0.723422	0.975317	1143.67	921.99	452.422	700.605	820.172
1303	ENSG00000089289	IGBP1	109.422	0.317805	0.595233	0.533917	0.593399	0.975317	48.1845	86.1481	163.627	99.9492	149.201
1304	ENSG00000089327	FXYD5	98.1479	-0.809467	0.519036	-1.55956	0.118864	0.975317	131.799	103.583	120.273	55.7409	79.3437
1305	ENSG00000089335	ZNF302	9.60889	1.54781	1.64332	0.94188	0.346254	0.975317	5.66877	0	10.4889	24.9873	6.89945
1306	ENSG00000089351	GRAMD1A	78.8349	-0.261061	0.689797	-0.378461	0.705088	0.975317	140.302	82.0458	31.4668	90.3387	50.021
1307	ENSG00000089486	CDIP1	85.9023	-1.0802	0.550112	-1.9636	0.0495765	0.975317	103.455	132.299	90.904	44.2083	58.6453
1308	ENSG00000089597	GANAB	117.045	0.6605	0.531389	1.24297	0.213879	0.975317	96.3691	105.634	83.2121	91.2998	208.708
1309	ENSG00000089685	BIRC5	73.8918	1.3084	0.595561	2.19693	0.0280256	0.975317	53.8533	41.0229	44.7527	79.7672	150.063
1310	ENSG00000089692	LAG3	0.279705	-1.6707	4.54204	-0.36783	0.713	0.975317	0	0	1.39852	0	0
1311	ENSG00000089693	MLF2	454.517	-0.51046	0.395014	-1.29226	0.196268	0.975317	749.695	424.587	374.804	335.406	388.094
1312	ENSG00000089737	DDX24	425.197	0.169197	0.427296	0.395972	0.692126	0.975317	283.438	291.263	639.125	493.019	419.142
1313	ENSG00000089775	ZBTB25	6.1055	-0.872899	1.73874	-0.502029	0.615647	0.975317	14.1719	4.10229	4.19557	2.88315	5.17459
1314	ENSG00000089818	NECAP1	21.1622	0.851168	1.25946	0.675818	0.499156	0.975317	0	33.8439	13.9852	35.5589	22.4232
1315	ENSG00000089876	DHX32	2.87282	1.5655	2.64888	0.591005	0.554517	0.975317	4.25158	0	0.699261	7.6884	1.72486
1316	ENSG00000089916	GPATCH2L	95.9561	0.40173	0.536705	0.748512	0.454152	0.975317	56.6877	94.3527	103.491	119.17	106.079
1317	ENSG00000090006	LTBP4	4.86687	-0.76905	2.4239	-0.317279	0.751032	0.975317	0	2.05115	15.3838	0	6.89945
1318	ENSG00000090013	BLVRB	82.0298	0.383081	0.597262	0.641396	0.521266	0.975317	38.2642	97.4294	83.2121	90.3387	100.904
1319	ENSG00000090020	SLC9A1	34.8082	0.550178	0.76742	0.716919	0.473424	0.975317	26.9266	33.8439	27.2712	48.0525	37.947
1320	ENSG00000090054	SPTLC1	62.6405	0.731801	0.66447	1.10133	0.270753	0.975317	31.1782	60.5088	56.6402	51.8967	112.979
1321	ENSG00000090060	PAPOLA	249.46	-0.266913	0.40265	-0.662891	0.5074	0.975317	328.789	275.879	198.59	225.847	218.195
1322	ENSG00000090061	CCNK	16.1393	0.447767	1.09646	0.408374	0.682999	0.975317	9.92034	13.3324	18.8801	14.4158	24.1481
1323	ENSG00000090263	MRPS33	68.5912	0.959513	0.772712	1.24175	0.214329	0.975317	8.50315	77.9435	62.2343	111.482	82.7934
1324	ENSG00000090266	NDUFB2	135.073	-0.366304	0.531589	-0.689074	0.490777	0.975317	127.547	187.68	130.063	65.3514	164.724
1325	ENSG00000090273	NUDC	83.1316	0.319986	0.656689	0.487272	0.626066	0.975317	29.761	69.7389	126.566	82.6503	106.942
1326	ENSG00000090316	MAEA	130.979	-0.551193	0.506049	-1.08921	0.276062	0.975317	117.627	214.345	118.175	87.4556	117.291
1327	ENSG00000090339	ICAM1	5.45681	4.20484	2.22896	1.88646	0.0592333	0.975317	0	2.05115	0	10.5716	14.6613
1328	ENSG00000090372	STRN4	26.1096	0.463969	0.868311	0.534336	0.593109	0.975317	18.4235	23.5882	25.8727	30.7536	31.91
1329	ENSG00000090376	IRAK3	3.15814	-0.738371	2.84256	-0.259755	0.795053	0.975317	0	11.2813	0	1.9221	2.58729
1330	ENSG00000090432	MUL1	48.254	0.225502	0.722068	0.312301	0.754812	0.975317	32.5954	46.1508	56.6402	31.7147	74.1691
1331	ENSG00000090447	TFAP4	10.5381	0.879405	1.80049	0.488425	0.625249	0.975317	17.0063	6.15344	0.699261	28.8315	0
1332	ENSG00000090470	PDCD7	51.4949	-0.264962	0.71209	-0.372091	0.709825	0.975317	69.4424	27.6905	68.5276	37.481	54.3332
1333	ENSG00000090487	SPG21	26.9604	0.449296	0.899279	0.499618	0.617344	0.975317	14.1719	31.7928	24.4741	22.1042	42.2591
1334	ENSG00000090520	DNAJB11	75.0418	-0.622434	0.576158	-1.08032	0.28	0.975317	87.8659	107.685	66.4298	52.8578	60.3702
1335	ENSG00000090530	P3H2	29.2723	0.757171	0.913271	0.829075	0.407062	0.975317	41.0986	9.23015	18.8801	37.481	39.6718
1336	ENSG00000090539	CHRD	0.419557	-2.12174	4.518	-0.46962	0.638627	0.975317	0	0	2.09778	0	0
1337	ENSG00000090554	FLT3LG	1.11882	-3.50197	4.45047	-0.786878	0.431353	0.975317	0	0	5.59409	0	0
1338	ENSG00000090565	RAB11FIP3	70.6291	0.548319	0.666445	0.822752	0.410649	0.975317	22.6751	79.9947	75.5202	91.2998	83.6559
1339	ENSG00000090581	GNPTG	12.0935	-0.694351	1.33121	-0.521596	0.601952	0.975317	25.5095	4.10229	13.286	11.5326	6.03702
1340	ENSG00000090612	ZNF268	8.83048	1.34944	1.69796	0.794739	0.426765	0.975317	0	2.05115	13.9852	13.4547	14.6613
1341	ENSG00000090615	GOLGA3	235.845	-0.229213	0.413025	-0.554961	0.578921	0.975317	177.149	269.726	304.179	205.665	222.507
1342	ENSG00000090659	CD209	0.283438	-1.12159	4.56003	-0.245961	0.805712	0.975317	1.41719	0	0	0	0
1343	ENSG00000090661	CERS4	1.55238	4.393	4.3561	1.00847	0.313229	0.975317	0	0	0	0	7.76188
1344	ENSG00000090674	MCOLN1	37.7078	-0.788796	0.752953	-1.0476	0.294822	0.975317	48.1845	52.3042	35.6623	23.0652	29.3227
1345	ENSG00000090686	USP48	270.9	-0.619301	0.391903	-1.58024	0.114052	0.975317	402.483	276.905	265.719	207.587	201.809
1346	ENSG00000090857	PDPR	177.409	0.482658	0.565185	0.853982	0.393115	0.975317	66.608	144.606	246.839	289.276	139.714
1347	ENSG00000090861	AARS1	146.5	0.381697	0.509061	0.749807	0.453371	0.975317	73.694	129.222	188.101	184.522	156.963
1348	ENSG00000090863	GLG1	330.012	0.533886	0.353313	1.51108	0.130767	0.975317	250.843	282.033	306.276	405.563	405.343
1349	ENSG00000090889	KIF4A	83.6563	1.27369	0.681718	1.86836	0.0617125	0.975317	51.0189	22.5626	86.0092	184.522	74.1691
1350	ENSG00000090905	TNRC6A	394.163	-0.569459	0.374796	-1.51938	0.128666	0.975317	515.858	527.144	317.465	308.497	301.851
1351	ENSG00000090971	NAT14	28.0695	0.383085	0.840645	0.455703	0.648603	0.975317	24.0923	21.537	29.369	31.7147	33.6348
1352	ENSG00000090975	PITPNM2	3.77138	1.6674	2.64001	0.631588	0.527656	0.975317	0	1.02557	4.89483	0	12.9365
1353	ENSG00000091009	RBM27	29.9428	-1.45287	0.902634	-1.60959	0.107488	0.975317	21.2579	54.3554	44.7527	8.64945	20.6984
1354	ENSG00000091039	OSBPL8	268.416	0.161502	0.375274	0.430356	0.666936	0.975317	219.665	258.444	290.193	288.315	285.465
1355	ENSG00000091073	DTX2	10.9021	0.940798	1.57911	0.595777	0.551324	0.975317	0	6.15344	17.4815	6.72735	24.1481
1356	ENSG00000091106	NLRC4	0.556906	2.91043	4.4061	0.660547	0.508903	0.975317	0	0	0	1.9221	0.862431
1357	ENSG00000091127	PUS7	17.4435	0.687764	1.14122	0.602655	0.546738	0.975317	15.5891	8.20458	18.1808	37.481	7.76188
1358	ENSG00000091129	NRCAM	1.11882	-3.50197	4.45047	-0.786878	0.431353	0.975317	0	0	5.59409	0	0
1359	ENSG00000091136	LAMB1	240.667	-0.350712	0.398731	-0.879572	0.379091	0.975317	225.334	239.984	324.457	189.327	224.232
1360	ENSG00000091140	DLD	37.8542	-0.216936	0.777903	-0.278873	0.780342	0.975317	45.3501	47.1763	27.9705	23.0652	45.7089
1361	ENSG00000091157	WDR7	27.4793	-1.0608	0.933783	-1.13603	0.255945	0.975317	18.4235	60.5088	25.1734	13.4547	19.8359
1362	ENSG00000091164	TXNL1	226.839	-0.425062	0.487881	-0.871241	0.383622	0.975317	416.654	178.45	163.627	204.704	170.761
1363	ENSG00000091317	CMTM6	24.8053	-0.430029	1.0511	-0.409124	0.682448	0.975317	11.3375	24.6137	46.8505	6.72735	34.4973
1364	ENSG00000091409	ITGA6	67.0561	0.366382	0.618754	0.592129	0.553764	0.975317	56.6877	49.2275	74.1217	100.91	54.3332
1365	ENSG00000091428	RAPGEF4	0.205115	-1.12159	4.56003	-0.245961	0.805712	0.975317	0	1.02557	0	0	0
1366	ENSG00000091483	FH	17.0128	-0.323389	1.28878	-0.250925	0.801872	0.975317	26.9266	13.3324	15.3838	0.96105	28.4602
1367	ENSG00000091490	SEL1L3	7.17813	-1.34667	1.66666	-0.808006	0.419087	0.975317	11.3375	3.07672	13.9852	5.7663	1.72486
1368	ENSG00000091513	TF	1.52793	1.40126	4.11093	0.340861	0.733208	0.975317	2.83438	0	0	4.80525	0
1369	ENSG00000091536	MYO15A	3.61864	-2.5515	2.5972	-0.982406	0.3259	0.975317	14.1719	0	2.09778	0.96105	0.862431
1370	ENSG00000091592	NLRP1	37.0494	-0.253525	1.0523	-0.240925	0.809614	0.975317	2.83438	64.6111	51.0461	53.8188	12.9365
1371	ENSG00000091622	PITPNM3	1.05228	2.39558	4.38263	0.546608	0.584648	0.975317	1.41719	0	0	3.8442	0
1372	ENSG00000091640	SPAG7	162.757	0.268986	0.425576	0.632053	0.527353	0.975317	136.05	166.143	148.943	180.677	181.973
1373	ENSG00000091656	ZFHX4	750.035	-0.267842	0.417453	-0.64161	0.521126	0.975317	1111.08	910.709	392.985	717.904	617.501
1374	ENSG00000091831	ESR1	10.5909	-0.57688	1.60874	-0.358591	0.719901	0.975317	21.2579	0	15.3838	7.6884	8.62431
1375	ENSG00000091844	RGS17	61.7365	-1.2081	0.638209	-1.89295	0.0583643	0.975317	99.2034	81.0202	59.4372	42.2862	26.7354
1376	ENSG00000091879	ANGPT2	96.6468	-0.437133	0.578281	-0.755919	0.449698	0.975317	131.799	125.12	67.1291	105.716	53.4708
1377	ENSG00000091947	TMEM101	34.2601	-0.225485	0.820912	-0.274676	0.783565	0.975317	49.6017	24.6137	34.9631	42.2862	19.8359
1378	ENSG00000091972	CD200	0.19221	1.35581	4.55186	0.297858	0.765812	0.975317	0	0	0	0.96105	0
1379	ENSG00000091986	CCDC80	5513.31	-0.54392	0.379778	-1.43221	0.152085	0.975317	8324.59	7326.69	3266.25	4905.2	3743.82
1380	ENSG00000092010	PSME1	148.934	0.373224	0.481911	0.774467	0.438654	0.975317	109.124	110.762	179.011	209.509	136.264
1381	ENSG00000092094	OSGEP	8.31276	1.01939	2.04973	0.497327	0.618959	0.975317	4.25158	0	13.286	24.0263	0
1382	ENSG00000092096	SLC22A17	18.6321	-1.06148	1.33641	-0.794272	0.427037	0.975317	29.761	27.6905	13.286	0	22.4232
1383	ENSG00000092098	RNF31	0.566877	-2.44333	4.49628	-0.543412	0.586846	0.975317	2.83438	0	0	0	0
1384	ENSG00000092148	HECTD1	343.71	-0.271585	0.370732	-0.732565	0.463824	0.975317	368.47	327.158	411.166	364.238	247.518
1385	ENSG00000092199	HNRNPC	310.651	0.693869	0.379217	1.82974	0.0672888	0.975317	218.248	317.928	211.177	398.836	407.068
1386	ENSG00000092200	RPGRIP1	0.19221	1.35581	4.55186	0.297858	0.765812	0.975317	0	0	0	0.96105	0
1387	ENSG00000092201	SUPT16H	796.536	0.325356	0.340257	0.956207	0.338968	0.975317	582.466	837.893	748.909	1089.83	723.58
1388	ENSG00000092203	TOX4	105.533	0.867746	0.499291	1.73796	0.0822186	0.975317	73.694	83.0714	81.1143	168.184	121.603
1389	ENSG00000092208	GEMIN2	3.82017	3.46139	2.56375	1.35013	0.176975	0.975317	0	0	2.09778	14.4158	2.58729
1390	ENSG00000092330	TINF2	7.20756	0.66326	1.85527	0.357499	0.720718	0.975317	11.3375	0	6.29335	2.88315	15.5238
1391	ENSG00000092421	SEMA6A	11.6492	-0.826148	1.58482	-0.521287	0.602167	0.975317	32.5954	9.23015	0.699261	1.9221	13.7989
1392	ENSG00000092439	TRPM7	78.7215	0.371938	0.595721	0.624349	0.532398	0.975317	39.6814	87.1737	83.9114	100.91	81.931
1393	ENSG00000092445	TYRO3	19.8434	0.838532	1.12421	0.745888	0.455735	0.975317	24.0923	3.07672	18.1808	37.481	16.3862
1394	ENSG00000092470	WDR76	13.3086	-0.587223	1.21981	-0.481405	0.630229	0.975317	24.0923	12.3069	9.78966	13.4547	6.89945
1395	ENSG00000092607	TBX15	19.6065	-0.512729	1.15774	-0.442871	0.657859	0.975317	43.9329	15.3836	7.69188	24.9873	6.03702
1396	ENSG00000092621	PHGDH	58.4381	1.64819	0.772185	2.13445	0.0328059	0.975317	15.5891	14.358	63.6328	86.4945	112.116
1397	ENSG00000092820	EZR	263.242	0.618924	0.383174	1.61526	0.106255	0.975317	236.671	204.089	209.778	385.381	280.29
1398	ENSG00000092841	MYL6	5437.53	-0.499081	0.311542	-1.60197	0.109163	0.975317	7781.8	6238.56	4454.3	4427.56	4285.42
1399	ENSG00000092847	AGO1	60.313	0.985363	0.655186	1.50394	0.132596	0.975317	38.2642	29.7416	61.535	104.754	67.2697
1400	ENSG00000092871	RFFL	1.38733	-3.77836	4.31615	-0.8754	0.381356	0.975317	2.83438	4.10229	0	0	0
1401	ENSG00000092929	UNC13D	0.771991	-2.91345	4.47187	-0.651506	0.51472	0.975317	2.83438	1.02557	0	0	0
1402	ENSG00000092931	MFSD11	36.5707	0.806367	0.983727	0.819705	0.412384	0.975317	8.50315	12.3069	62.9335	74.9619	24.1481
1403	ENSG00000092964	DPYSL2	372.336	-0.365865	0.425907	-0.859026	0.390326	0.975317	497.434	501.505	228.658	363.277	270.803
1404	ENSG00000092969	TGFB2	11.141	-0.385212	1.37361	-0.280438	0.779142	0.975317	18.4235	14.358	4.19557	14.4158	4.31216
1405	ENSG00000093000	NUP50	68.7836	1.49332	0.652287	2.28935	0.0220588	0.975317	22.6751	43.0741	53.1439	74.9619	150.063
1406	ENSG00000093009	CDC45	3.63656	2.55981	2.54996	1.00386	0.315445	0.975317	0	0	3.49631	8.64945	6.03702
1407	ENSG00000093010	COMT	11.024	2.04973	1.54073	1.33036	0.183398	0.975317	0	3.07672	11.1882	11.5326	29.3227
1408	ENSG00000093072	ADA2	2.55095	-4.64893	3.83661	-1.21173	0.225616	0.975317	12.7547	0	0	0	0
1409	ENSG00000093144	ECHDC1	43.6363	-0.331605	0.751473	-0.441273	0.659015	0.975317	25.5095	46.1508	70.6254	33.6368	42.2591
1410	ENSG00000093167	LRRFIP2	104.279	0.388885	0.512882	0.758235	0.44831	0.975317	82.1971	117.941	78.3173	106.677	136.264
1411	ENSG00000093183	SEC22C	55.457	-0.23431	0.684519	-0.342299	0.732126	0.975317	45.3501	38.9718	92.3025	48.0525	52.6083
1412	ENSG00000094631	HDAC6	14.7762	-0.714029	1.1576	-0.616821	0.537353	0.975317	19.8407	21.537	11.1882	14.4158	6.89945
1413	ENSG00000094661	OR1I1	0.283438	-1.12159	4.56003	-0.245961	0.805712	0.975317	1.41719	0	0	0	0
1414	ENSG00000094804	CDC6	30.1451	0.782382	0.948612	0.824765	0.409505	0.975317	31.1782	33.8439	5.59409	32.6757	47.4337
1415	ENSG00000094880	CDC23	7.67982	0.705091	1.86538	0.377988	0.70544	0.975317	11.3375	5.12786	2.09778	0	19.8359
1416	ENSG00000094914	AAAS	16.7173	-0.699329	1.35744	-0.515181	0.606427	0.975317	2.83438	41.0229	15.3838	1.9221	22.4232
1417	ENSG00000094916	CBX5	588.548	-0.649979	0.352587	-1.84346	0.0652626	0.975317	807.799	756.873	501.37	391.147	485.549
1418	ENSG00000094975	SUCO	83.9856	0.844725	0.575932	1.46671	0.142455	0.975317	46.7673	60.5088	83.2121	143.196	86.2431
1419	ENSG00000095110	NXPE1	0.862431	3.54638	4.37842	0.809969	0.417958	0.975317	0	0	0	0	4.31216
1420	ENSG00000095203	EPB41L4B	2.90146	-4.84633	3.29955	-1.46878	0.141891	0.975317	4.25158	10.2557	0	0	0
1421	ENSG00000095209	TMEM38B	10.4449	1.65921	1.54482	1.07405	0.282802	0.975317	9.92034	0	6.99261	16.3379	18.9735
1422	ENSG00000095261	PSMD5	10.6558	0.542047	1.43856	0.376799	0.706323	0.975317	14.1719	1.02557	11.8874	11.5326	14.6613
1423	ENSG00000095303	PTGS1	56.5166	0.239852	0.829025	0.289318	0.772338	0.975317	73.694	8.20458	76.2195	61.5072	62.9575
1424	ENSG00000095319	NUP188	8.2599	-0.58094	1.72773	-0.336246	0.736686	0.975317	0	10.2557	18.1808	7.6884	5.17459
1425	ENSG00000095321	CRAT	45.711	-0.424928	0.692367	-0.613732	0.539392	0.975317	41.0986	49.2275	62.2343	34.5978	41.3967
1426	ENSG00000095370	SH2D3C	0.615344	-2.6163	4.48639	-0.583164	0.559783	0.975317	0	3.07672	0	0	0
1427	ENSG00000095380	NANS	220.417	0.402553	0.401352	1.00299	0.315864	0.975317	231.002	191.782	163.627	276.782	238.894
1428	ENSG00000095383	TBC1D2	18.1438	0.795946	1.02792	0.774328	0.438737	0.975317	12.7547	17.4347	11.8874	20.1821	28.4602
1429	ENSG00000095397	WHRN	3.93024	2.50534	2.49762	1.00309	0.315818	0.975317	0	4.10229	0	8.64945	6.89945
1430	ENSG00000095485	CWF19L1	38.2971	-0.378827	0.734925	-0.515463	0.606229	0.975317	45.3501	39.9973	41.2564	35.5589	29.3227
1431	ENSG00000095539	SEMA4G	0.139852	-1.09577	4.56092	-0.240253	0.810134	0.975317	0	0	0.699261	0	0
1432	ENSG00000095585	BLNK	1.57565	-3.97388	4.13594	-0.960816	0.336645	0.975317	0	7.17901	0.699261	0	0
1433	ENSG00000095637	SORBS1	1.21778	-1.85373	4.44462	-0.417073	0.676625	0.975317	0	5.12786	0	0.96105	0
1434	ENSG00000095752	IL11	228.421	-0.379299	0.441907	-0.858324	0.390713	0.975317	308.948	294.339	152.439	201.821	184.56
1435	ENSG00000095787	WAC	583.1	-0.208774	0.346338	-0.602803	0.54664	0.975317	789.376	568.167	492.28	560.292	505.385
1436	ENSG00000095794	CREM	40.879	-0.536224	0.774988	-0.691913	0.488992	0.975317	25.5095	73.8412	40.5572	31.7147	32.7724
1437	ENSG00000095951	HIVEP1	24.8088	0.701084	1.21636	0.576379	0.564359	0.975317	0	16.4092	42.6549	36.5199	28.4602
1438	ENSG00000096060	FKBP5	27.5226	-0.340716	1.10416	-0.308576	0.757644	0.975317	68.0252	13.3324	9.0904	39.4031	7.76188
1439	ENSG00000096070	BRPF3	9.11014	2.163	1.68933	1.28039	0.200409	0.975317	2.83438	0	8.39114	6.72735	27.5978
1440	ENSG00000096092	TMEM14A	4.09733	0.687172	2.23826	0.307011	0.758835	0.975317	0	2.05115	7.69188	3.8442	6.89945
1441	ENSG00000096093	EFHC1	22.7749	0.541727	1.10946	0.488279	0.625352	0.975317	14.1719	24.6137	18.8801	51.8967	4.31216
1442	ENSG00000096384	HSP90AB1	10475.7	-0.0783851	0.279459	-0.280488	0.779103	0.975317	11581.3	10735.7	9789.66	11552.8	8719.18
1443	ENSG00000096433	ITPR3	13.2959	0.390418	1.26223	0.309309	0.757087	0.975317	8.50315	5.12786	21.6771	9.6105	21.5608
1444	ENSG00000096654	ZNF184	1.53768	4.37567	4.35644	1.00441	0.315179	0.975317	0	0	0	7.6884	0
1445	ENSG00000096696	DSP	18.7119	0.834528	1.06708	0.782067	0.434175	0.975317	5.66877	14.358	22.3764	27.8705	23.2857
1446	ENSG00000096717	SIRT1	25.5281	-0.462788	0.923981	-0.500864	0.616467	0.975317	43.9329	18.4603	23.7749	25.9484	15.5238
1447	ENSG00000096746	HNRNPH3	116.758	-0.124657	0.481374	-0.258962	0.795665	0.975317	137.468	111.787	113.28	97.0661	124.19
1448	ENSG00000096872	IFT74	59.3883	-0.371624	0.671407	-0.5535	0.579921	0.975317	86.4487	46.1508	63.6328	31.7147	68.9945
1449	ENSG00000096996	IL12RB1	2.11431	4.83527	3.91482	1.23512	0.216787	0.975317	0	0	0	10.5716	0
1450	ENSG00000097007	ABL1	53.8118	-0.447475	0.727244	-0.615303	0.538354	0.975317	97.7862	55.3809	27.9705	49.9746	37.947
1451	ENSG00000097021	ACOT7	69.3906	0.176191	0.607948	0.289812	0.77196	0.975317	41.0986	73.8412	82.5128	70.1567	79.3437
1452	ENSG00000097046	CDC7	0.699261	-2.83731	4.47532	-0.63399	0.526088	0.975317	0	0	3.49631	0	0
1453	ENSG00000097096	SYDE2	16.3844	0.930286	1.08472	0.857629	0.391097	0.975317	11.3375	16.4092	8.39114	25.9484	19.8359
1454	ENSG00000099139	PCSK5	27.5572	-0.341151	1.06407	-0.320608	0.748507	0.975317	59.5221	20.5115	10.4889	40.3641	6.89945
1455	ENSG00000099194	SCD	100.042	-1.32832	0.583402	-2.27685	0.0227951	0.975317	204.076	111.787	79.7158	61.5072	43.1216
1456	ENSG00000099204	ABLIM1	36.2823	-0.734903	0.777853	-0.944784	0.344769	0.975317	43.9329	45.1252	40.5572	17.2989	34.4973
1457	ENSG00000099219	ERMP1	20.8208	-0.820095	1.24725	-0.657523	0.510845	0.975317	9.92034	27.6905	37.7601	27.8705	0.862431
1458	ENSG00000099246	RAB18	68.5307	1.02766	0.645026	1.59321	0.111113	0.975317	22.6751	55.3809	66.4298	98.9882	99.1796
1459	ENSG00000099250	NRP1	234.637	0.160435	0.435091	0.368739	0.712322	0.975317	208.327	150.759	312.57	256.6	244.931
1460	ENSG00000099256	PRTFDC1	25.5146	-0.766106	1.01188	-0.757113	0.448982	0.975317	49.6017	22.5626	19.5793	29.7926	6.03702
1461	ENSG00000099260	PALMD	6.87419	-2.20836	1.89931	-1.16271	0.244946	0.975317	2.83438	17.4347	9.78966	0	4.31216
1462	ENSG00000099282	TSPAN15	0.344973	2.22873	4.4526	0.500545	0.616691	0.975317	0	0	0	0	1.72486
1463	ENSG00000099284	MACROH2A2	9.26264	0.846375	1.44422	0.586042	0.557847	0.975317	4.25158	13.3324	3.49631	10.5716	14.6613
1464	ENSG00000099290	WASHC2A	23.9524	1.13595	1.21794	0.932676	0.350987	0.975317	22.6751	0	25.8727	38.442	32.7724
1465	ENSG00000099326	MZF1	10.4822	-1.00995	1.71725	-0.588122	0.55645	0.975317	7.08596	0	32.166	10.5716	2.58729
1466	ENSG00000099330	OCEL1	2.45676	2.27776	3.37278	0.675335	0.499463	0.975317	0	0	2.79705	0	9.48675
1467	ENSG00000099331	MYO9B	135.221	0.294587	0.519276	0.567302	0.570509	0.975317	134.633	76.918	160.131	193.171	111.254
1468	ENSG00000099337	KCNK6	59.1854	0.689898	0.658756	1.04727	0.294973	0.975317	34.0126	54.3554	53.8431	102.832	50.8835
1469	ENSG00000099338	CATSPERG	3.17935	-4.96324	3.03111	-1.63743	0.10154	0.975317	14.1719	1.02557	0.699261	0	0
1470	ENSG00000099364	FBXL19	8.56576	-0.884863	1.75891	-0.503076	0.614911	0.975317	0	17.4347	13.9852	1.9221	9.48675
1471	ENSG00000099365	STX1B	0.19221	1.35581	4.55186	0.297858	0.765812	0.975317	0	0	0	0.96105	0
1472	ENSG00000099377	HSD3B7	60.093	1.37232	0.784091	1.7502	0.0800839	0.975317	8.50315	30.7672	69.9261	98.9882	92.2802
1473	ENSG00000099381	SETD1A	31.1081	1.25165	1.05772	1.18336	0.236668	0.975317	7.08596	4.10229	48.249	62.4683	33.6348
1474	ENSG00000099385	BCL7C	95.2283	0.25465	0.54246	0.469435	0.638759	0.975317	113.375	85.1225	67.1291	126.859	83.6559
1475	ENSG00000099617	EFNA2	6.12859	0.471097	1.72642	0.272875	0.784949	0.975317	8.50315	6.15344	1.39852	7.6884	6.89945
1476	ENSG00000099622	CIRBP	281.135	0.230481	0.409922	0.562257	0.573941	0.975317	225.334	198.961	363.616	321.952	295.814
1477	ENSG00000099624	ATP5F1D	18.9275	1.38298	1.10555	1.25095	0.210954	0.975317	7.08596	6.15344	20.9778	17.2989	43.1216
1478	ENSG00000099785	MARCHF2	8.07455	0.996925	1.7401	0.572913	0.566704	0.975317	0	3.07672	13.9852	8.64945	14.6613
1479	ENSG00000099795	NDUFB7	64.3997	1.72263	0.649596	2.65185	0.00800525	0.975317	18.4235	41.0229	40.5572	87.4556	134.539
1480	ENSG00000099797	TECR	3.99512	-1.28851	2.56763	-0.50183	0.615787	0.975317	0	3.07672	12.5867	0	4.31216
1481	ENSG00000099800	TIMM13	312.69	0.53761	0.409318	1.31343	0.189039	0.975317	212.579	206.14	374.804	350.783	419.142
1482	ENSG00000099804	CDC34	59.1223	1.20052	0.739236	1.624	0.104376	0.975317	19.8407	22.5626	73.4224	104.754	75.0315
1483	ENSG00000099812	MISP	1.51974	3.27087	4.10593	0.79662	0.425672	0.975317	0	0	0.699261	0	6.89945
1484	ENSG00000099814	CEP170B	95.7376	-0.457945	0.62107	-0.737348	0.460911	0.975317	110.541	165.117	46.8505	93.2219	62.9575
1485	ENSG00000099817	POLR2E	254.795	-0.483066	0.410695	-1.17622	0.239509	0.975317	331.623	290.237	241.245	154.729	256.142
1486	ENSG00000099840	IZUMO4	4.25158	-5.38787	3.26387	-1.65076	0.0987875	0.975317	21.2579	0	0	0	0
1487	ENSG00000099864	PALM	2.62674	5.15151	3.21102	1.60432	0.108643	0.975317	0	0	0	1.9221	11.2116
1488	ENSG00000099869	IGF2-AS	0.172486	1.27694	4.55777	0.280167	0.779349	0.975317	0	0	0	0	0.862431
1489	ENSG00000099899	TRMT2A	21.8754	1.83344	1.23467	1.48497	0.137553	0.975317	15.5891	0	16.7823	52.8578	24.1481
1490	ENSG00000099901	RANBP1	977.52	-0.297754	0.39632	-0.751297	0.452474	0.975317	1356.25	1229.66	583.883	1032.17	685.633
1491	ENSG00000099904	ZDHHC8	0.882155	3.57759	4.37734	0.817298	0.413758	0.975317	0	0	0	0.96105	3.44973
1492	ENSG00000099910	KLHL22	7.65431	3.63801	1.75633	2.07137	0.0383242	0.975317	0	1.02557	2.79705	16.3379	18.1111
1493	ENSG00000099917	MED15	162.177	-0.407416	0.473518	-0.860401	0.389568	0.975317	198.407	157.938	183.206	181.638	89.6929
1494	ENSG00000099937	SERPIND1	1.53768	4.37567	4.35644	1.00441	0.315179	0.975317	0	0	0	7.6884	0
1495	ENSG00000099940	SNAP29	67.3229	0.551412	0.676542	0.815044	0.415047	0.975317	22.6751	61.5344	85.3099	90.3387	76.7564
1496	ENSG00000099949	LZTR1	16.5434	-0.369667	1.14484	-0.322899	0.746771	0.975317	17.0063	21.537	16.083	4.80525	23.2857
1497	ENSG00000099953	MMP11	1.25867	-3.66929	4.44579	-0.825342	0.409178	0.975317	0	0	6.29335	0	0
1498	ENSG00000099954	CECR2	0.19221	1.35581	4.55186	0.297858	0.765812	0.975317	0	0	0	0.96105	0
1499	ENSG00000099956	SMARCB1	231.192	-0.715483	0.502331	-1.42433	0.154352	0.975317	444.998	233.831	144.048	195.093	137.989
1500	ENSG00000099957	P2RX6	3.44823	-1.74108	3.07456	-0.566285	0.5712	0.975317	0	14.358	0	2.88315	0
1501	ENSG00000099968	BCL2L13	34.8912	0.518792	0.786301	0.659788	0.50939	0.975317	28.3438	39.9973	20.9778	48.0525	37.0846
1502	ENSG00000099991	CABIN1	90.3833	0.30298	0.760271	0.398515	0.69025	0.975317	11.3375	110.762	125.168	120.131	84.5183
1503	ENSG00000099992	TBC1D10A	16.9133	-1.75626	1.23718	-1.41956	0.155735	0.975317	22.6751	43.0741	4.89483	9.6105	4.31216
1504	ENSG00000099994	SUSD2	1.71017	4.52919	3.85283	1.17555	0.239775	0.975317	0	0	0	7.6884	0.862431
1505	ENSG00000099995	SF3A1	116.208	-0.444808	0.524321	-0.848351	0.396242	0.975317	94.9519	173.322	121.671	72.0788	119.016
1506	ENSG00000100003	SEC14L2	22.6855	-0.551863	1.00509	-0.549071	0.582957	0.975317	14.1719	39.9973	23.7749	9.6105	25.8729
1507	ENSG00000100014	SPECC1L	11.3615	0.753733	1.31423	0.573516	0.566295	0.975317	7.08596	4.10229	15.3838	17.2989	12.9365
1508	ENSG00000100024	UPB1	0.978966	-3.31262	4.45644	-0.743333	0.45728	0.975317	0	0	4.89483	0	0
1509	ENSG00000100028	SNRPD3	44.5804	0.740105	0.690321	1.07212	0.283667	0.975317	34.0126	30.7672	40.5572	61.5072	56.058
1510	ENSG00000100029	PES1	114.276	-0.2031	0.520538	-0.390173	0.696409	0.975317	85.0315	134.35	141.95	130.703	79.3437
1511	ENSG00000100030	MAPK1	255.107	-0.166307	0.439683	-0.378243	0.70525	0.975317	318.868	328.183	153.838	238.34	236.306
1512	ENSG00000100036	SLC35E4	39.6589	0.563033	0.764099	0.736859	0.461208	0.975317	22.6751	51.2786	25.8727	51.8967	46.5713
1513	ENSG00000100053	CRYBB3	1.41719	-3.79604	4.44258	-0.854466	0.392847	0.975317	7.08596	0	0	0	0
1514	ENSG00000100055	CYTH4	0.139852	-1.09577	4.56092	-0.240253	0.810134	0.975317	0	0	0.699261	0	0
1515	ENSG00000100065	CARD10	8.77637	2.89552	1.89492	1.52804	0.126501	0.975317	0	0	6.99261	31.7147	5.17459
1516	ENSG00000100075	SLC25A1	291.514	-0.429109	0.371375	-1.15546	0.247902	0.975317	303.279	368.181	303.479	215.275	267.354
1517	ENSG00000100077	GRK3	5.34914	-1.13175	2.40289	-0.470996	0.637644	0.975317	0	20.5115	0	1.9221	4.31216
1518	ENSG00000100078	PLA2G3	5.84509	-0.906882	2.57856	-0.351701	0.725062	0.975317	0	21.537	0	7.6884	0
1519	ENSG00000100083	GGA1	139.668	-0.771287	0.492228	-1.56693	0.117131	0.975317	218.248	177.424	106.987	99.9492	95.7299
1520	ENSG00000100084	HIRA	13.7209	-1.50285	1.33177	-1.12846	0.259128	0.975317	41.0986	6.15344	8.39114	8.64945	4.31216
1521	ENSG00000100092	SH3BP1	7.05003	0.416609	1.64525	0.253219	0.800099	0.975317	7.08596	10.2557	1.39852	9.6105	6.89945
1522	ENSG00000100097	LGALS1	27858.8	-0.564835	0.364727	-1.54865	0.121465	0.975317	44617.5	33276.8	18126.3	24494.3	18779.4
1523	ENSG00000100099	HPS4	39.9684	0.60096	0.936509	0.641702	0.521066	0.975317	5.66877	39.9973	53.1439	76.884	24.1481
1524	ENSG00000100100	PIK3IP1	2.94532	2.24608	2.89094	0.776937	0.437196	0.975317	1.41719	0	2.09778	0	11.2116
1525	ENSG00000100104	SRRD	3.16532	-3.49239	2.99594	-1.16571	0.243733	0.975317	0	3.07672	11.8874	0	0.862431
1526	ENSG00000100105	PATZ1	117.072	-0.352198	0.486406	-0.724081	0.469016	0.975317	155.891	124.094	104.889	104.754	95.7299
1527	ENSG00000100106	TRIOBP	77.226	0.22231	0.693633	0.320501	0.748589	0.975317	49.6017	102.557	65.0313	32.6757	136.264
1528	ENSG00000100109	TFIP11	1.90238	4.68284	3.69283	1.26809	0.204766	0.975317	0	0	0	8.64945	0.862431
1529	ENSG00000100116	GCAT	19.6175	0.980811	1.22721	0.799218	0.424164	0.975317	31.1782	1.02557	10.4889	35.5589	19.8359
1530	ENSG00000100124	ANKRD54	15.652	-0.624555	1.20138	-0.519863	0.603159	0.975317	9.92034	19.4859	25.1734	3.8442	19.8359
1531	ENSG00000100129	EIF3L	0.517459	2.81139	4.41159	0.637272	0.523948	0.975317	0	0	0	0	2.58729
1532	ENSG00000100150	DEPDC5	9.49629	-1.59418	1.93695	-0.823038	0.410486	0.975317	0	29.7416	9.0904	8.64945	0
1533	ENSG00000100162	CENPM	12.5299	0.825691	1.24585	0.66275	0.507491	0.975317	11.3375	13.3324	4.19557	18.26	15.5238
1534	ENSG00000100167	SEPTIN3	2.46137	-4.61534	3.8692	-1.19284	0.232932	0.975317	0	12.3069	0	0	0
1535	ENSG00000100196	KDELR3	46.6951	0.398192	0.724794	0.549387	0.58274	0.975317	62.3564	26.6649	35.6623	43.2473	65.5448
1536	ENSG00000100201	DDX17	591.453	-0.262461	0.404767	-0.648425	0.51671	0.975317	867.321	689.185	345.435	526.655	528.671
1537	ENSG00000100207	TCF20	24.6342	1.56563	1.01583	1.54124	0.123259	0.975317	5.66877	7.17901	27.9705	46.1304	36.2221
1538	ENSG00000100209	HSCB	6.06427	3.73269	2.10417	1.77395	0.0760715	0.975317	0	0	2.79705	7.6884	19.8359
1539	ENSG00000100211	CBY1	84.9918	0.393556	0.623766	0.630935	0.528083	0.975317	120.461	67.6878	39.1586	119.17	78.4813
1540	ENSG00000100216	TOMM22	68.2219	1.35596	0.743307	1.82423	0.0681173	0.975317	21.2579	18.4603	85.3099	97.0661	119.016
1541	ENSG00000100219	XBP1	108.152	-0.429914	0.564921	-0.761016	0.446647	0.975317	192.738	91.276	78.3173	99.9492	78.4813
1542	ENSG00000100221	JOSD1	57.6341	-0.264224	0.641941	-0.411602	0.680631	0.975317	76.5284	61.5344	47.5498	41.3252	61.2326
1543	ENSG00000100225	FBXO7	48.6539	0.644568	0.750425	0.858937	0.390375	0.975317	45.3501	18.4603	55.2417	42.2862	81.931
1544	ENSG00000100226	GTPBP1	4.88519	2.34013	2.12483	1.10133	0.270753	0.975317	0	4.10229	1.39852	16.3379	2.58729
1545	ENSG00000100227	POLDIP3	9.99479	-2.50933	1.60375	-1.56467	0.117661	0.975317	14.1719	21.537	9.0904	0	5.17459
1546	ENSG00000100234	TIMP3	824.66	0.103893	0.342356	0.303466	0.761535	0.975317	901.334	827.637	674.088	652.553	1067.69
1547	ENSG00000100239	PPP6R2	11.3418	1.31656	1.82101	0.722982	0.469691	0.975317	0	0	20.9778	28.8315	6.89945
1548	ENSG00000100241	SBF1	166.183	0.729957	0.517443	1.4107	0.158333	0.975317	79.3627	105.634	208.38	263.328	174.211
1549	ENSG00000100242	SUN2	5.38258	1.85706	2.57121	0.72225	0.470141	0.975317	0	0	7.69188	19.221	0
1550	ENSG00000100243	CYB5R3	509.106	0.184886	0.333435	0.554488	0.579245	0.975317	463.422	474.84	509.762	467.07	630.437
1551	ENSG00000100258	LMF2	137.643	0.214354	0.501819	0.427153	0.669268	0.975317	158.725	74.8668	154.537	150.885	149.201
1552	ENSG00000100263	RHBDD3	1.71017	4.52919	3.85283	1.17555	0.239775	0.975317	0	0	0	7.6884	0.862431
1553	ENSG00000100266	PACSIN2	35.8401	-0.230298	0.843274	-0.273099	0.784777	0.975317	52.4361	14.358	47.5498	26.9094	37.947
1554	ENSG00000100271	TTLL1	1.44236	-2.22744	3.91387	-0.569116	0.569278	0.975317	4.25158	0	2.09778	0	0.862431
1555	ENSG00000100280	AP1B1	292.584	-0.366123	0.452759	-0.808649	0.418717	0.975317	432.244	359.976	172.718	289.276	208.708
1556	ENSG00000100284	TOM1	58.6944	-0.519586	0.623694	-0.833078	0.4048	0.975317	62.3564	57.4321	80.4151	43.2473	50.021
1557	ENSG00000100285	NEFH	0.19221	1.35581	4.55186	0.297858	0.765812	0.975317	0	0	0	0.96105	0
1558	ENSG00000100288	CHKB	0.839114	-3.09451	4.46436	-0.69316	0.488209	0.975317	0	0	4.19557	0	0
1559	ENSG00000100292	HMOX1	112.914	-1.61201	0.612676	-2.63109	0.00851109	0.975317	143.136	88.1993	232.155	26.9094	74.1691
1560	ENSG00000100294	MCAT	8.53109	3.20267	1.84461	1.73623	0.0825227	0.975317	0	0	5.59409	24.9873	12.074
1561	ENSG00000100296	THOC5	68.5285	0.724713	0.620232	1.16845	0.242624	0.975317	76.5284	37.9462	48.9483	107.638	71.5818
1562	ENSG00000100297	MCM5	70.8427	-0.262425	0.667654	-0.393056	0.694278	0.975317	92.1175	93.3271	42.6549	35.5589	90.5553
1563	ENSG00000100300	TSPO	182.502	0.965643	0.453958	2.12716	0.0334064	0.975317	179.983	109.736	107.686	212.392	302.713
1564	ENSG00000100302	RASD2	2.42266	-1.10201	3.46561	-0.317984	0.750497	0.975317	0	9.23015	0	2.88315	0
1565	ENSG00000100304	TTLL12	23.0131	0.919188	0.976519	0.94129	0.346556	0.975317	18.4235	7.17901	25.1734	29.7926	34.4973
1566	ENSG00000100316	RPL3	1597.59	-0.193811	0.41181	-0.470632	0.637904	0.975317	2232.08	2047.04	768.488	1625.14	1315.21
1567	ENSG00000100319	ZMAT5	0.139852	-1.09577	4.56092	-0.240253	0.810134	0.975317	0	0	0.699261	0	0
1568	ENSG00000100320	RBFOX2	359.511	-0.10533	0.37766	-0.278903	0.78032	0.975317	432.244	415.357	262.922	349.822	337.211
1569	ENSG00000100321	SYNGR1	12.651	0.393798	1.50904	0.260959	0.794124	0.975317	24.0923	0	9.78966	17.2989	12.074
1570	ENSG00000100325	ASCC2	15.7816	0.514232	1.2277	0.418859	0.675319	0.975317	18.4235	10.2557	11.8874	3.8442	34.4973
1571	ENSG00000100330	MTMR3	6.27293	-1.08762	2.31266	-0.47029	0.638147	0.975317	0	0	23.7749	6.72735	0.862431
1572	ENSG00000100335	MIEF1	110.751	-0.191033	0.51216	-0.372995	0.709152	0.975317	117.627	89.2248	142.649	82.6503	121.603
1573	ENSG00000100342	APOL1	21.9996	1.97421	1.25022	1.57909	0.114316	0.975317	0	24.6137	5.59409	54.7799	25.0105
1574	ENSG00000100344	PNPLA3	12.0086	-0.611745	1.41711	-0.431685	0.66597	0.975317	5.66877	3.07672	32.8653	11.5326	6.89945
1575	ENSG00000100345	MYH9	16912.8	-0.472584	0.377096	-1.25322	0.210125	0.975317	26264.8	20635.5	10221.1	16084.1	11358.2
1576	ENSG00000100348	TXN2	180.419	-0.485511	0.437797	-1.10899	0.267436	0.975317	174.315	203.063	233.553	114.365	176.798
1577	ENSG00000100353	EIF3D	321.369	0.640854	0.361099	1.77473	0.0759419	0.975317	225.334	262.547	299.284	423.823	395.856
1578	ENSG00000100354	TNRC6B	431.517	-0.750811	0.344021	-2.18246	0.0290758	0.975317	521.527	536.375	487.385	352.705	259.592
1579	ENSG00000100359	SGSM3	7.81491	0.951961	1.72814	0.550858	0.581731	0.975317	0	9.23015	7.69188	5.7663	16.3862
1580	ENSG00000100360	IFT27	5.45523	1.58392	2.30197	0.688072	0.491407	0.975317	5.66877	0	3.49631	0	18.1111
1581	ENSG00000100364	KIAA0930	132.344	-0.382626	0.510191	-0.749966	0.453275	0.975317	178.566	172.296	87.4077	126.859	96.5923
1582	ENSG00000100372	SLC25A17	26.6103	-0.264486	0.956134	-0.276621	0.782071	0.975317	29.761	10.2557	45.452	18.26	29.3227
1583	ENSG00000100376	FAM118A	12.0123	-2.81379	1.6561	-1.69904	0.0893107	0.975317	1.41719	31.7928	21.6771	0	5.17459
1584	ENSG00000100379	KCTD17	29.0967	1.01744	0.921101	1.10459	0.269339	0.975317	28.3438	9.23015	24.4741	23.0652	60.3702
1585	ENSG00000100380	ST13	263.311	-0.105363	0.39523	-0.266587	0.789787	0.975317	276.352	262.547	274.11	192.21	311.338
1586	ENSG00000100387	RBX1	80.3993	0.416919	0.60751	0.686274	0.49254	0.975317	35.4298	87.1737	89.5055	85.5335	104.354
1587	ENSG00000100395	L3MBTL2	35.1524	0.808957	0.91432	0.884763	0.376285	0.975317	5.66877	49.2275	25.8727	43.2473	51.7459
1588	ENSG00000100399	CHADL	0.19221	1.35581	4.55186	0.297858	0.765812	0.975317	0	0	0	0.96105	0
1589	ENSG00000100401	RANGAP1	362.169	0.219644	0.364686	0.602283	0.546985	0.975317	308.948	303.57	406.271	448.81	343.248
1590	ENSG00000100403	ZC3H7B	37.1596	-0.814288	0.810957	-1.00411	0.315327	0.975317	21.2579	50.2531	62.9335	29.7926	21.5608
1591	ENSG00000100412	ACO2	11.2384	0.471461	1.3288	0.354802	0.722738	0.975317	17.0063	8.20458	4.19557	17.2989	9.48675
1592	ENSG00000100416	TRMU	15.3275	1.27853	1.23458	1.0356	0.300388	0.975317	2.83438	14.358	11.8874	9.6105	37.947
1593	ENSG00000100418	DESI1	122.394	-0.702684	0.543373	-1.29319	0.195945	0.975317	221.082	119.992	93.701	71.1177	106.079
1594	ENSG00000100422	CERK	36.0441	0.748715	0.781507	0.958039	0.338043	0.975317	24.0923	32.8183	27.9705	63.4293	31.91
1595	ENSG00000100425	BRD1	11.4077	0.865613	1.50341	0.575768	0.564772	0.975317	0	14.358	11.1882	21.1431	10.3492
1596	ENSG00000100426	ZBED4	9.35611	0.939068	1.73231	0.542091	0.587756	0.975317	2.83438	0	17.4815	5.7663	20.6984
1597	ENSG00000100439	ABHD4	14.022	-1.39795	1.28939	-1.08419	0.278279	0.975317	12.7547	34.8695	8.39114	2.88315	11.2116
1598	ENSG00000100442	FKBP3	56.8881	1.04625	0.793566	1.31841	0.187366	0.975317	8.50315	38.9718	71.3247	84.5724	81.0686
1599	ENSG00000100461	RBM23	20.9684	-1.00554	0.996062	-1.00951	0.312728	0.975317	32.5954	15.3836	30.7675	10.5716	15.5238
1600	ENSG00000100478	AP4S1	21.3813	-0.971432	1.17058	-0.82987	0.406612	0.975317	4.25158	34.8695	40.5572	4.80525	22.4232
1601	ENSG00000100479	POLE2	3.23992	-3.49688	2.70778	-1.29142	0.196558	0.975317	7.08596	6.15344	2.09778	0	0.862431
1602	ENSG00000100483	VCPKMT	1.46129	1.21375	3.72828	0.325551	0.744764	0.975317	0	0	2.79705	1.9221	2.58729
1603	ENSG00000100485	SOS2	29.1246	0.423829	1.00042	0.423652	0.67182	0.975317	4.25158	47.1763	25.1734	42.2862	26.7354
1604	ENSG00000100490	CDKL1	12.5979	1.2058	1.77658	0.678719	0.497316	0.975317	0	0	24.4741	30.7536	7.76188
1605	ENSG00000100503	NIN	113.072	0.758646	0.577814	1.31296	0.189196	0.975317	36.847	109.736	118.175	164.34	136.264
1606	ENSG00000100519	PSMC6	55.2001	0.542192	0.858563	0.631511	0.527706	0.975317	8.50315	30.7672	99.9944	63.4293	73.3067
1607	ENSG00000100522	GNPNAT1	43.0115	0.591624	0.748826	0.790068	0.429488	0.975317	19.8407	35.895	51.0461	63.4293	44.8464
1608	ENSG00000100526	CDKN3	47.7996	0.441352	0.682855	0.646333	0.518064	0.975317	45.3501	50.2531	30.0682	53.8188	59.5078
1609	ENSG00000100528	CNIH1	66.7017	-0.265431	0.632687	-0.419531	0.674828	0.975317	92.1175	60.5088	62.2343	38.442	80.2061
1610	ENSG00000100532	CGRRF1	5.86776	3.0169	1.92178	1.56984	0.116451	0.975317	0	3.07672	1.39852	15.3768	9.48675
1611	ENSG00000100554	ATP6V1D	161.537	0.146234	0.42925	0.340674	0.733349	0.975317	143.136	171.271	150.341	156.651	186.285
1612	ENSG00000100567	PSMA3	55.4647	0.35586	0.652239	0.545597	0.585343	0.975317	59.5221	32.8183	57.3394	67.2735	60.3702
1613	ENSG00000100568	VTI1B	48.8525	-0.229696	0.6821	-0.336749	0.736306	0.975317	53.8533	63.5855	38.4594	37.481	50.8835
1614	ENSG00000100575	TIMM9	27.2827	-0.602781	0.892382	-0.675474	0.499375	0.975317	17.0063	44.0996	33.5645	20.1821	21.5608
1615	ENSG00000100577	GSTZ1	42.248	0.238374	0.766546	0.310971	0.755823	0.975317	22.6751	30.7672	64.332	45.1694	48.2962
1616	ENSG00000100578	KIAA0586	42.6263	-0.512401	0.882569	-0.580579	0.561524	0.975317	12.7547	36.9206	95.0995	44.2083	24.1481
1617	ENSG00000100580	TMED8	73.2318	-0.206588	0.645756	-0.319916	0.749032	0.975317	62.3564	127.171	42.6549	70.1567	63.8199
1618	ENSG00000100591	AHSA1	86.0007	-0.253768	0.583627	-0.434811	0.663699	0.975317	106.289	83.0714	86.7084	46.1304	107.804
1619	ENSG00000100592	DAAM1	75.5705	-0.433039	0.601609	-0.719801	0.471647	0.975317	70.8596	65.6367	116.077	77.8451	47.4337
1620	ENSG00000100596	SPTLC2	93.1655	0.97615	0.53743	1.81633	0.0693197	0.975317	48.1845	66.6622	86.0092	136.469	128.502
1621	ENSG00000100599	RIN3	8.12252	0.547429	1.50092	0.36473	0.715313	0.975317	2.83438	9.23015	8.39114	11.5326	8.62431
1622	ENSG00000100603	SNW1	291.122	-0.477531	0.445665	-1.0715	0.283944	0.975317	483.262	289.212	212.575	282.549	188.01
1623	ENSG00000100605	ITPK1	24.9822	0.397746	0.922385	0.431214	0.666313	0.975317	25.5095	12.3069	28.6697	23.0652	35.3597
1624	ENSG00000100614	PPM1A	166.382	-1.25394	0.529326	-2.36893	0.0178396	0.975317	351.464	184.603	114.679	84.5724	96.5923
1625	ENSG00000100626	GALNT16	338.757	-0.238577	0.446804	-0.533963	0.593367	0.975317	496.017	396.897	190.199	353.666	257.005
1626	ENSG00000100629	CEP128	78.514	-0.514451	0.619313	-0.83068	0.406155	0.975317	110.541	83.0714	74.1217	90.3387	34.4973
1627	ENSG00000100632	ERH	110.116	0.881322	0.528489	1.66763	0.09539	0.975317	87.8659	76.918	82.5128	98.0271	205.259
1628	ENSG00000100644	HIF1A	1304.46	-0.674905	0.366499	-1.84149	0.0655492	0.975317	2016.66	1672.71	912.536	1039.86	880.543
1629	ENSG00000100647	SUSD6	19.3824	0.408707	1.34295	0.304335	0.760873	0.975317	15.5891	0	35.6623	16.3379	29.3227
1630	ENSG00000100650	SRSF5	253.073	-0.230746	0.386914	-0.596375	0.550925	0.975317	284.856	294.339	227.959	254.678	203.534
1631	ENSG00000100664	EIF5	511.395	-0.34192	0.448758	-0.761925	0.446105	0.975317	821.971	593.807	260.825	502.629	377.745
1632	ENSG00000100697	DICER1	105.253	0.274585	0.546349	0.502582	0.615258	0.975317	63.7736	82.0458	144.747	120.131	115.566
1633	ENSG00000100711	ZFYVE21	0.891471	-1.33824	4.46488	-0.299727	0.764386	0.975317	0	0	3.49631	0.96105	0
1634	ENSG00000100714	MTHFD1	41.2664	0.218985	0.710038	0.308413	0.757768	0.975317	42.5158	33.8439	39.8579	46.1304	43.984
1635	ENSG00000100722	ZC3H14	30.2807	0.633413	0.874406	0.724393	0.468824	0.975317	11.3375	34.8695	27.9705	29.7926	47.4337
1636	ENSG00000100726	TELO2	0.38442	2.37072	4.44107	0.533816	0.593469	0.975317	0	0	0	1.9221	0
1637	ENSG00000100739	BDKRB1	13.3692	0.759482	1.41788	0.535645	0.592204	0.975317	0	14.358	16.7823	20.1821	15.5238
1638	ENSG00000100764	PSMC1	528.629	-0.473723	0.329597	-1.43728	0.150639	0.975317	562.625	548.681	674.088	467.07	390.681
1639	ENSG00000100767	PAPLN	4.50902	1.11191	2.73601	0.406398	0.68445	0.975317	0	0	9.0904	13.4547	0
1640	ENSG00000100802	C14orf93	9.61111	0.933514	1.68127	0.555242	0.578729	0.975317	0	13.3324	7.69188	2.88315	24.1481
1641	ENSG00000100804	PSMB5	436.492	-0.289387	0.346324	-0.835597	0.403382	0.975317	548.453	383.564	480.393	394.031	376.02
1642	ENSG00000100811	YY1	243.213	-0.151946	0.37629	-0.403801	0.686359	0.975317	250.843	244.086	265.02	225.847	230.269
1643	ENSG00000100813	ACIN1	471.311	-0.704224	0.373149	-1.88724	0.0591276	0.975317	762.449	484.07	426.549	348.861	334.623
1644	ENSG00000100814	CCNB1IP1	16.1815	-0.369917	1.11663	-0.331279	0.740434	0.975317	12.7547	28.716	11.8874	16.3379	11.2116
1645	ENSG00000100815	TRIP11	99.8578	-0.657292	0.510097	-1.28856	0.19755	0.975317	99.2034	115.89	135.657	69.1956	79.3437
1646	ENSG00000100823	APEX1	85.1739	-0.261839	0.592504	-0.441918	0.658548	0.975317	114.793	109.736	49.6476	66.3125	85.3807
1647	ENSG00000100842	EFS	2.66649	-4.73081	3.76419	-1.2568	0.208828	0.975317	0	13.3324	0	0	0
1648	ENSG00000100865	CINP	64.1577	0.821455	0.60119	1.36638	0.171819	0.975317	41.0986	49.2275	56.6402	97.0661	76.7564
1649	ENSG00000100883	SRP54	39.4304	0.344287	0.765162	0.449953	0.652744	0.975317	29.761	53.3298	23.7749	39.4031	50.8835
1650	ENSG00000100888	CHD8	119.887	-0.211582	0.555924	-0.380594	0.703504	0.975317	151.64	59.4832	169.221	109.56	109.529
1651	ENSG00000100889	PCK2	9.92555	0.923443	1.39225	0.663275	0.507154	0.975317	2.83438	11.2813	7.69188	10.5716	17.2486
1652	ENSG00000100897	DCAF11	43.5771	-0.750056	0.821261	-0.913299	0.361086	0.975317	15.5891	75.8924	64.332	24.9873	37.0846
1653	ENSG00000100902	PSMA6	16.8942	0.771453	1.41809	0.544008	0.586436	0.975317	12.7547	0	26.5719	36.5199	8.62431
1654	ENSG00000100906	NFKBIA	52.9389	0.417674	0.691784	0.603763	0.546001	0.975317	65.1908	41.0229	34.2638	42.2862	81.931
1655	ENSG00000100908	EMC9	21.1421	-0.46834	1.31188	-0.357	0.721092	0.975317	0	38.9718	32.166	25.9484	8.62431
1656	ENSG00000100916	BRMS1L	6.05346	0.534348	2.2336	0.239231	0.810926	0.975317	0	15.3836	0	10.5716	4.31216
1657	ENSG00000100918	REC8	2.26751	-4.47861	3.99692	-1.12051	0.262494	0.975317	11.3375	0	0	0	0
1658	ENSG00000100926	TM9SF1	32.0714	-0.319691	1.00947	-0.316691	0.751478	0.975317	12.7547	10.2557	81.1143	26.9094	29.3227
1659	ENSG00000100934	SEC23A	50.5618	0.218893	0.752092	0.291046	0.771016	0.975317	17.0063	60.5088	64.332	64.3904	46.5713
1660	ENSG00000100938	GMPR2	0.978966	-3.31262	4.45644	-0.743333	0.45728	0.975317	0	0	4.89483	0	0
1661	ENSG00000100941	PNN	340.228	-0.68514	0.366615	-1.86883	0.0616467	0.975317	427.992	457.405	317.465	258.522	239.756
1662	ENSG00000100968	NFATC4	105.088	-0.418022	0.562176	-0.743578	0.457132	0.975317	68.0252	103.583	178.312	88.4166	87.1056
1663	ENSG00000100983	GSS	60.3729	-0.778465	0.797041	-0.976694	0.328721	0.975317	77.9456	28.716	110.483	69.1956	15.5238
1664	ENSG00000100985	MMP9	1.32596	-1.96974	4.44096	-0.443539	0.657376	0.975317	5.66877	0	0	0.96105	0
1665	ENSG00000100987	VSX1	1.53768	4.37567	4.35644	1.00441	0.315179	0.975317	0	0	0	7.6884	0
1666	ENSG00000100991	TRPC4AP	2.51285	2.9522	2.85932	1.03248	0.301845	0.975317	1.41719	0	0.699261	0.96105	9.48675
1667	ENSG00000100994	PYGB	88.4118	0.510427	0.60531	0.84325	0.399089	0.975317	68.0252	39.9973	118.175	120.131	95.7299
1668	ENSG00000100997	ABHD12	43.9476	-0.93296	0.846149	-1.10259	0.270203	0.975317	46.7673	44.0996	72.0239	7.6884	49.1586
1669	ENSG00000101000	PROCR	5.2025	-2.12789	2.33442	-0.911529	0.362017	0.975317	0	7.17901	15.3838	0	3.44973
1670	ENSG00000101003	GINS1	34.2574	2.25837	0.996953	2.26527	0.023496	0.975317	1.41719	23.5882	15.3838	98.9882	31.91
1671	ENSG00000101004	NINL	7.83635	-3.22641	2.06971	-1.55887	0.119027	0.975317	0	20.5115	16.083	0	2.58729
1672	ENSG00000101017	CD40	4.82955	-1.99839	2.38378	-0.83833	0.401846	0.975317	0	12.3069	8.39114	0	3.44973
1673	ENSG00000101019	UQCC1	29.167	-0.36383	0.858747	-0.423675	0.671802	0.975317	22.6751	38.9718	34.2638	32.6757	17.2486
1674	ENSG00000101040	ZMYND8	88.9964	0.564159	0.561831	1.00414	0.31531	0.975317	69.4424	58.4576	95.7988	139.352	81.931
1675	ENSG00000101049	SGK2	0.344973	2.22873	4.4526	0.500545	0.616691	0.975317	0	0	0	0	1.72486
1676	ENSG00000101057	MYBL2	38.9359	2.58153	0.920404	2.80478	0.00503514	0.975317	2.83438	7.17901	27.9705	73.0398	83.6559
1677	ENSG00000101079	NDRG3	49.4682	-1.15439	0.770558	-1.49813	0.1341	0.975317	92.1175	63.5855	34.9631	14.4158	42.2591
1678	ENSG00000101082	SLA2	0.419557	-2.12174	4.518	-0.46962	0.638627	0.975317	0	0	2.09778	0	0
1679	ENSG00000101096	NFATC2	10.2098	-1.09228	1.40328	-0.778379	0.436345	0.975317	15.5891	7.17901	16.083	9.6105	2.58729
1680	ENSG00000101104	PABPC1L	7.89472	-0.740643	1.57382	-0.470603	0.637924	0.975317	5.66877	11.2813	11.1882	9.6105	1.72486
1681	ENSG00000101109	STK4	346.811	0.379717	0.398076	0.953881	0.340144	0.975317	201.241	375.36	351.029	445.927	360.496
1682	ENSG00000101126	ADNP	47.8165	0.484367	0.687429	0.704608	0.481055	0.975317	31.1782	36.9206	55.2417	60.5462	55.1956
1683	ENSG00000101132	PFDN4	83.3888	-0.468549	0.58938	-0.794986	0.426622	0.975317	124.713	100.506	56.6402	55.7409	79.3437
1684	ENSG00000101134	DOK5	0.517459	2.81139	4.41159	0.637272	0.523948	0.975317	0	0	0	0	2.58729
1685	ENSG00000101138	CSTF1	50.6616	0.396838	0.76796	0.516743	0.605336	0.975317	79.3627	26.6649	29.369	81.6893	36.2221
1686	ENSG00000101146	RAE1	43.0768	-0.763478	0.737903	-1.03466	0.300828	0.975317	52.4361	39.9973	62.2343	20.1821	40.5343
1687	ENSG00000101150	TPD52L2	84.3173	0.178916	0.56828	0.314838	0.752884	0.975317	69.4424	86.1481	84.6106	61.5072	119.878
1688	ENSG00000101152	DNAJC5	138.032	-0.12293	0.489897	-0.250931	0.801867	0.975317	123.296	197.936	106.987	115.326	146.613
1689	ENSG00000101160	CTSZ	254.919	-0.245948	0.411299	-0.597978	0.549855	0.975317	256.512	275.879	283.201	296.003	163
1690	ENSG00000101161	PRPF6	611.264	-0.278016	0.337879	-0.822828	0.410606	0.975317	661.829	689.185	620.944	658.319	426.041
1691	ENSG00000101166	PRELID3B	24.9892	1.32528	0.909954	1.45643	0.145274	0.975317	9.92034	18.4603	18.1808	32.6757	45.7089
1692	ENSG00000101182	PSMA7	1632.02	0.56252	0.300668	1.8709	0.0613584	0.975317	1279.72	1206.07	1625.08	2220.03	1829.22
1693	ENSG00000101187	SLCO4A1	5.6042	4.0339	2.17788	1.85221	0.0639954	0.975317	0	0	2.09778	17.2989	8.62431
1694	ENSG00000101188	NTSR1	4.91539	-5.59815	2.80582	-1.99519	0.0460221	0.975317	18.4235	6.15344	0	0	0
1695	ENSG00000101189	MRGBP	53.6399	1.06623	0.712549	1.49636	0.13456	0.975317	21.2579	27.6905	62.2343	84.5724	72.4442
1696	ENSG00000101190	TCFL5	16.6708	0.397418	1.08612	0.365906	0.714435	0.975317	17.0063	11.2813	16.083	26.9094	12.074
1697	ENSG00000101191	DIDO1	39.1139	0.327387	1.1037	0.296627	0.766751	0.975317	0	65.6367	40.5572	55.7409	33.6348
1698	ENSG00000101193	GID8	59.1304	0.256524	0.613207	0.418332	0.675704	0.975317	51.0189	53.3298	60.1365	59.5851	71.5818
1699	ENSG00000101194	SLC17A9	53.8485	-0.855439	0.641092	-1.33435	0.18209	0.975317	58.1049	70.7645	67.8284	34.5978	37.947
1700	ENSG00000101199	ARFGAP1	79.6826	-0.86608	0.671302	-1.29015	0.196999	0.975317	32.5954	123.069	135.657	51.8967	55.1956
1701	ENSG00000101210	EEF1A2	3.1277	1.65604	2.72891	0.606851	0.54395	0.975317	0	0	4.89483	3.8442	6.89945
1702	ENSG00000101213	PTK6	2.55095	-4.64893	3.83661	-1.21173	0.225616	0.975317	12.7547	0	0	0	0
1703	ENSG00000101216	GMEB2	11.4205	0.356829	1.34725	0.264858	0.791119	0.975317	2.83438	19.4859	8.39114	13.4547	12.9365
1704	ENSG00000101220	C20orf27	37.3849	0.763824	0.927357	0.823657	0.410135	0.975317	4.25158	52.3042	30.7675	46.1304	53.4708
1705	ENSG00000101224	CDC25B	286.536	0.234279	0.456605	0.51309	0.607888	0.975317	419.489	224.6	160.131	342.134	286.327
1706	ENSG00000101236	RNF24	171.473	1.29638	0.460217	2.81689	0.0048491	0.975317	93.5347	92.3015	138.454	328.679	204.396
1707	ENSG00000101246	ARFRP1	71.3608	0.379356	0.658004	0.576525	0.56426	0.975317	31.1782	69.7389	89.5055	108.599	57.7829
1708	ENSG00000101247	NDUFAF5	11.7229	1.29131	1.58975	0.812277	0.416633	0.975317	0	12.3069	9.78966	2.88315	33.6348
1709	ENSG00000101255	TRIB3	16.4073	3.45986	1.36275	2.53888	0.0111209	0.975317	0	3.07672	6.29335	10.5716	62.0951
1710	ENSG00000101265	RASSF2	4.98153	1.97422	2.08772	0.945635	0.344335	0.975317	5.66877	0	1.39852	5.7663	12.074
1711	ENSG00000101266	CSNK2A1	232.706	0.107129	0.439938	0.24351	0.807611	0.975317	160.143	224.6	291.592	301.77	185.423
1712	ENSG00000101280	ANGPT4	21.2848	-1.97197	1.41468	-1.39393	0.163339	0.975317	62.3564	28.716	0	6.72735	8.62431
1713	ENSG00000101290	CDS2	18.4783	0.465561	1.08661	0.428453	0.668321	0.975317	11.3375	9.23015	27.2712	30.7536	13.7989
1714	ENSG00000101294	HM13	247.961	-0.160048	0.423298	-0.378098	0.705358	0.975317	232.419	189.731	353.826	208.548	255.28
1715	ENSG00000101298	SNPH	55.7989	-0.879462	0.743233	-1.18329	0.236693	0.975317	126.13	44.0996	34.9631	38.442	35.3597
1716	ENSG00000101306	MYLK2	0.19221	1.35581	4.55186	0.297858	0.765812	0.975317	0	0	0	0.96105	0
1717	ENSG00000101307	SIRPB1	0.862431	3.54638	4.37842	0.809969	0.417958	0.975317	0	0	0	0	4.31216
1718	ENSG00000101310	SEC23B	20.7046	0.711215	0.963651	0.738042	0.460489	0.975317	19.8407	14.358	15.3838	29.7926	24.1481
1719	ENSG00000101333	PLCB4	142.382	-0.187203	0.486394	-0.384879	0.700327	0.975317	109.124	185.629	153.838	162.417	100.904
1720	ENSG00000101335	MYL9	1951.22	0.585977	0.332231	1.76377	0.0777713	0.975317	1247.13	1392.73	2234.84	2362.26	2519.16
1721	ENSG00000101337	TM9SF4	93.4029	-0.307579	0.564121	-0.545236	0.585591	0.975317	137.468	74.8668	91.6032	59.5851	103.492
1722	ENSG00000101343	CRNKL1	20.3409	0.732285	1.12576	0.650481	0.515382	0.975317	15.5891	3.07672	29.369	35.5589	18.1111
1723	ENSG00000101346	POFUT1	21.5654	-0.810279	1.0125	-0.800279	0.423549	0.975317	28.3438	11.2813	38.4594	12.4937	17.2486
1724	ENSG00000101347	SAMHD1	57.9603	0.451433	0.685355	0.658685	0.510098	0.975317	53.8533	52.3042	45.452	102.832	35.3597
1725	ENSG00000101349	PAK5	1.98589	-1.65646	3.76065	-0.440472	0.659595	0.975317	0	8.20458	0	0	1.72486
1726	ENSG00000101350	KIF3B	274.823	0.407079	0.408854	0.995658	0.319417	0.975317	188.487	239.984	299.983	392.108	253.555
1727	ENSG00000101353	MROH8	5.37465	-0.864051	2.34848	-0.36792	0.712933	0.975317	0	0	19.5793	3.8442	3.44973
1728	ENSG00000101361	NOP56	411.084	0.812911	0.447524	1.81646	0.0692993	0.975317	167.229	415.357	362.917	714.06	395.856
1729	ENSG00000101363	MANBAL	152.98	1.17571	0.630873	1.86362	0.0623752	0.975317	90.7003	27.6905	186.004	251.795	208.708
1730	ENSG00000101365	IDH3B	72.1308	0.603112	0.569337	1.05932	0.289453	0.975317	62.3564	66.6622	50.3468	94.1829	87.1056
1731	ENSG00000101367	MAPRE1	38.6737	-0.305134	0.771743	-0.395383	0.69256	0.975317	32.5954	36.9206	55.9409	23.0652	44.8464
1732	ENSG00000101384	JAG1	39.8674	-1.19414	0.813041	-1.46873	0.141905	0.975317	90.7003	33.8439	30.0682	24.0263	20.6984
1733	ENSG00000101391	CDK5RAP1	31.289	-0.617539	0.86115	-0.717109	0.473307	0.975317	55.2705	26.6649	27.2712	31.7147	15.5238
1734	ENSG00000101400	SNTA1	57.4384	-0.415877	0.623527	-0.666976	0.504787	0.975317	68.0252	69.7389	53.8431	49.0136	46.5713
1735	ENSG00000101407	TTI1	11.3753	0.891856	1.55295	0.574297	0.565767	0.975317	8.50315	0	16.7823	22.1042	9.48675
1736	ENSG00000101412	E2F1	210.446	-0.329145	0.588402	-0.559387	0.575897	0.975317	279.187	339.465	69.2269	239.301	125.053
1737	ENSG00000101417	PXMP4	22.8287	-1.7507	0.969287	-1.80617	0.0708917	0.975317	32.5954	38.9718	23.7749	6.72735	12.074
1738	ENSG00000101421	CHMP4B	211.969	0.229658	0.510479	0.449887	0.652792	0.975317	316.034	187.68	92.3025	242.185	221.645
1739	ENSG00000101439	CST3	172.509	0.39779	0.47954	0.829523	0.406808	0.975317	157.308	140.503	161.529	122.053	281.153
1740	ENSG00000101441	CST4	0.283438	-1.12159	4.56003	-0.245961	0.805712	0.975317	1.41719	0	0	0	0
1741	ENSG00000101442	ACTR5	2.8494	-3.25601	3.41722	-0.952825	0.340679	0.975317	0	0	13.286	0.96105	0
1742	ENSG00000101444	AHCY	9.29131	2.41935	1.81866	1.3303	0.183421	0.975317	0	0	9.78966	21.1431	15.5238
1743	ENSG00000101447	FAM83D	3.16643	2.70936	2.79474	0.969449	0.332321	0.975317	0	0	2.79705	0.96105	12.074
1744	ENSG00000101452	DHX35	11.4102	-0.819231	1.87018	-0.43805	0.66135	0.975317	24.0923	17.4347	0	0	15.5238
1745	ENSG00000101460	MAP1LC3A	100.642	-1.47668	0.594981	-2.48189	0.0130686	0.975317	111.958	216.396	77.618	56.702	40.5343
1746	ENSG00000101464	PIGU	56.208	0.198306	0.708733	0.279804	0.779628	0.975317	42.5158	88.1993	28.6697	50.9357	70.7194
1747	ENSG00000101474	APMAP	45.812	0.614466	0.700997	0.876559	0.380726	0.975317	42.5158	31.7928	39.1586	42.2862	73.3067
1748	ENSG00000101542	CDH20	0.978966	-3.31262	4.45644	-0.743333	0.45728	0.975317	0	0	4.89483	0	0
1749	ENSG00000101544	ADNP2	10.408	-1.30041	1.54582	-0.841241	0.400213	0.975317	1.41719	31.7928	7.69188	7.6884	3.44973
1750	ENSG00000101557	USP14	185.388	-0.249335	0.535631	-0.465497	0.641575	0.975317	76.5284	241.01	275.509	177.794	156.1
1751	ENSG00000101558	VAPA	188.792	0.391882	0.414517	0.945395	0.344457	0.975317	154.474	193.833	155.236	198.937	241.481
1752	ENSG00000101574	METTL4	2.87632	1.49373	3.1814	0.469522	0.638697	0.975317	0	0	4.89483	0	9.48675
1753	ENSG00000101577	LPIN2	62.9496	-0.67247	0.739989	-0.908757	0.363478	0.975317	121.879	73.8412	26.5719	60.5462	31.91
1754	ENSG00000101596	SMCHD1	115.861	-0.245088	0.535931	-0.457313	0.647446	0.975317	76.5284	111.787	181.808	97.0661	112.116
1755	ENSG00000101608	MYL12A	298.773	0.333325	0.463184	0.719638	0.471748	0.975317	357.132	323.055	132.86	289.276	391.544
1756	ENSG00000101624	CEP76	6.22809	-0.808647	2.17151	-0.372389	0.709603	0.975317	0	9.23015	13.286	0	8.62431
1757	ENSG00000101638	ST8SIA5	2.55462	-4.67793	3.39379	-1.37838	0.168086	0.975317	0	7.17901	5.59409	0	0
1758	ENSG00000101654	RNMT	76.9792	0.602132	0.645413	0.932939	0.350851	0.975317	29.761	65.6367	95.0995	121.092	73.3067
1759	ENSG00000101665	SMAD7	7.6492	-0.877216	1.80164	-0.486898	0.626331	0.975317	0	15.3836	12.5867	7.6884	2.58729
1760	ENSG00000101680	LAMA1	24.6043	-0.842606	0.927562	-0.908409	0.363662	0.975317	19.8407	25.6393	44.0535	15.3768	18.1111
1761	ENSG00000101695	RNF125	3.8761	3.0413	2.55524	1.19022	0.23396	0.975317	0	0	2.79705	1.9221	14.6613
1762	ENSG00000101745	ANKRD12	183.58	0.257581	0.431386	0.5971	0.550441	0.975317	178.566	129.222	202.786	221.042	186.285
1763	ENSG00000101751	POLI	0.19221	1.35581	4.55186	0.297858	0.765812	0.975317	0	0	0	0.96105	0
1764	ENSG00000101752	MIB1	76.6402	0.291563	0.585693	0.497808	0.618619	0.975317	49.6017	79.9947	81.1143	67.2735	105.217
1765	ENSG00000101773	RBBP8	84.7267	0.273161	0.529246	0.516133	0.605762	0.975317	82.1971	74.8668	77.618	93.2219	95.7299
1766	ENSG00000101782	RIOK3	155.008	0.738329	0.532153	1.38744	0.165309	0.975317	62.3564	125.12	178.312	256.6	152.65
1767	ENSG00000101811	CSTF2	88.4535	-0.615031	0.532529	-1.15492	0.248122	0.975317	110.541	113.839	83.9114	70.1567	63.8199
1768	ENSG00000101825	MXRA5	196.407	-0.534183	0.440856	-1.2117	0.225629	0.975317	303.279	164.092	205.583	146.08	163
1769	ENSG00000101843	PSMD10	22.2725	1.04186	1.40297	0.742613	0.457716	0.975317	0	3.07672	43.3542	52.8578	12.074
1770	ENSG00000101844	ATG4A	6.19394	1.20891	1.70199	0.71029	0.477524	0.975317	5.66877	3.07672	3.49631	14.4158	4.31216
1771	ENSG00000101846	STS	11.4193	0.709173	1.56787	0.452315	0.651042	0.975317	21.2579	0	6.29335	10.5716	18.9735
1772	ENSG00000101849	TBL1X	254.519	-0.325306	0.470997	-0.690675	0.48977	0.975317	206.91	175.373	447.527	222.003	220.782
1773	ENSG00000101856	PGRMC1	70.5699	0.515343	0.640123	0.805069	0.42078	0.975317	79.3627	28.716	72.7232	79.7672	92.2802
1774	ENSG00000101871	MID1	54.6546	-1.13172	0.644489	-1.75599	0.07909	0.975317	82.1971	68.7134	58.738	31.7147	31.91
1775	ENSG00000101882	NKAP	116.01	0.245863	0.490287	0.501468	0.616042	0.975317	128.964	99.4806	95.7988	148.002	107.804
1776	ENSG00000101901	ALG13	5.07482	-0.587181	2.3454	-0.250354	0.802313	0.975317	9.92034	0	7.69188	0	7.76188
1777	ENSG00000101911	PRPS2	32.3231	0.781246	0.931097	0.83906	0.401436	0.975317	22.6751	45.1252	7.69188	57.663	28.4602
1778	ENSG00000101928	MOSPD1	28.1466	1.09686	0.86167	1.27295	0.203036	0.975317	12.7547	20.5115	24.4741	35.5589	47.4337
1779	ENSG00000101940	WDR13	237.879	0.434684	0.404994	1.07331	0.283132	0.975317	208.327	163.066	253.832	312.341	251.83
1780	ENSG00000101945	SUV39H1	11.2787	-1.42718	1.64116	-0.869618	0.384509	0.975317	11.3375	3.07672	30.7675	0	11.2116
1781	ENSG00000101955	SRPX	22.0186	1.20047	1.0596	1.13295	0.257236	0.975317	2.83438	16.4092	23.7749	31.7147	35.3597
1782	ENSG00000101958	GLRA2	2.80745	-1.00327	2.9805	-0.336611	0.73641	0.975317	0	0	10.4889	0.96105	2.58729
1783	ENSG00000101966	XIAP	212.339	0.924458	0.5929	1.55921	0.118946	0.975317	45.3501	145.631	276.208	364.238	230.269
1784	ENSG00000101972	STAG2	150.115	-0.345106	0.495389	-0.696637	0.48603	0.975317	212.579	179.475	100.694	150.885	106.942
1785	ENSG00000101974	ATP11C	127.053	0.320369	0.495247	0.646887	0.517705	0.975317	147.388	123.069	76.9188	141.274	146.613
1786	ENSG00000101986	ABCD1	2.83077	0.863138	2.92114	0.29548	0.767627	0.975317	0	0	6.29335	0.96105	6.89945
1787	ENSG00000101997	CCDC22	0.139852	-1.09577	4.56092	-0.240253	0.810134	0.975317	0	0	0.699261	0	0
1788	ENSG00000102003	SYP	2.25416	3.88167	3.5321	1.09897	0.271781	0.975317	0	0	0.699261	10.5716	0
1789	ENSG00000102007	PLP2	1.9221	4.69774	4.06844	1.15468	0.248222	0.975317	0	0	0	9.6105	0
1790	ENSG00000102030	NAA10	112.42	0.387926	0.545912	0.710601	0.477331	0.975317	72.2768	97.4294	130.063	85.5335	176.798
1791	ENSG00000102032	RENBP	1.95793	-4.30105	4.18158	-1.02857	0.303682	0.975317	0	0	9.78966	0	0
1792	ENSG00000102043	MTMR8	1.31103	-2.00291	4.43997	-0.45111	0.651911	0.975317	0	0	5.59409	0.96105	0
1793	ENSG00000102053	ZC3H12B	2.98856	1.00145	3.15026	0.317895	0.750565	0.975317	0	0	6.29335	8.64945	0
1794	ENSG00000102054	RBBP7	84.0896	0.301496	0.545427	0.55277	0.580421	0.975317	79.3627	64.6111	86.7084	109.56	80.2061
1795	ENSG00000102078	SLC25A14	30.233	-0.419496	0.91603	-0.45795	0.646988	0.975317	21.2579	16.4092	62.9335	22.1042	28.4602
1796	ENSG00000102081	FMR1	213.013	-0.830218	0.432044	-1.9216	0.0546557	0.975317	314.617	279.981	180.409	162.417	127.64
1797	ENSG00000102098	SCML2	0.96105	3.69657	4.37346	0.845227	0.397984	0.975317	0	0	0	4.80525	0
1798	ENSG00000102100	SLC35A2	16.0173	-1.06386	1.19245	-0.892164	0.372305	0.975317	19.8407	27.6905	13.286	2.88315	16.3862
1799	ENSG00000102103	PQBP1	29.1348	0.71466	1.0251	0.697162	0.485702	0.975317	2.83438	44.0996	22.3764	29.7926	46.5713
1800	ENSG00000102119	EMD	56.0433	0.793079	0.647116	1.22556	0.220365	0.975317	53.8533	45.1252	31.4668	64.3904	85.3807
1801	ENSG00000102125	TAFAZZIN	27.8493	0.549637	0.864489	0.635794	0.524911	0.975317	19.8407	22.5626	27.9705	24.0263	44.8464
1802	ENSG00000102172	SMS	230.819	0.354822	0.439711	0.806943	0.419699	0.975317	136.05	260.495	225.861	214.314	317.375
1803	ENSG00000102174	PHEX	3.81335	-5.23577	2.99941	-1.7456	0.0808802	0.975317	14.1719	0	4.89483	0	0
1804	ENSG00000102178	UBL4A	89.5422	-0.653461	0.569013	-1.14841	0.250799	0.975317	151.64	93.3271	69.9261	67.2735	65.5448
1805	ENSG00000102181	CD99L2	68.5157	-0.804184	0.653228	-1.23109	0.218289	0.975317	102.038	103.583	42.6549	36.5199	57.7829
1806	ENSG00000102218	RP2	3.90693	1.52382	2.23822	0.68082	0.495986	0.975317	0	3.07672	3.49631	8.64945	4.31216
1807	ENSG00000102221	JADE3	2.65328	4.13309	2.94436	1.40373	0.160399	0.975317	0	0	0.699261	4.80525	7.76188
1808	ENSG00000102225	CDK16	633.155	-0.756081	0.391154	-1.93295	0.0532426	0.975317	1003.37	811.228	455.918	513.201	382.057
1809	ENSG00000102226	USP11	58.3108	-0.456739	0.727944	-0.627437	0.530373	0.975317	36.847	71.7901	87.4077	23.0652	72.4442
1810	ENSG00000102239	BRS3	0.344973	2.22873	4.4526	0.500545	0.616691	0.975317	0	0	0	0	1.72486
1811	ENSG00000102241	HTATSF1	85.4918	0.302016	0.741285	0.407422	0.683698	0.975317	15.5891	101.532	116.777	129.742	63.8199
1812	ENSG00000102309	PIN4	19.7561	-0.836098	1.00887	-0.828744	0.407249	0.975317	24.0923	18.4603	29.369	9.6105	17.2486
1813	ENSG00000102313	ITIH6	2.52203	3.37519	3.36872	1.00192	0.316382	0.975317	0	0	1.39852	0	11.2116
1814	ENSG00000102316	MAGED2	1433.84	-0.716526	0.365927	-1.95811	0.0502168	0.975317	2234.91	1814.24	1051.69	1204.2	864.156
1815	ENSG00000102349	KLF8	12.7183	-0.636742	1.55567	-0.409305	0.682316	0.975317	9.92034	7.17901	27.2712	19.221	0
1816	ENSG00000102359	SRPX2	125.829	-0.149138	0.488972	-0.305003	0.760364	0.975317	164.394	135.376	93.701	111.482	124.19
1817	ENSG00000102362	SYTL4	8.56329	0.819617	1.70487	0.480751	0.630694	0.975317	0	15.3836	4.19557	16.3379	6.89945
1818	ENSG00000102383	ZDHHC15	10.765	-2.15699	1.58154	-1.36385	0.172614	0.975317	26.9266	12.3069	7.69188	0	6.89945
1819	ENSG00000102384	CENPI	24.3768	0.372633	0.984985	0.378314	0.705197	0.975317	21.2579	26.6649	17.4815	46.1304	10.3492
1820	ENSG00000102385	DRP2	0.517459	2.81139	4.41159	0.637272	0.523948	0.975317	0	0	0	0	2.58729
1821	ENSG00000102387	TAF7L	0.419557	-2.12174	4.518	-0.46962	0.638627	0.975317	0	0	2.09778	0	0
1822	ENSG00000102390	PBDC1	68.5581	1.54448	0.678477	2.2764	0.0228221	0.975317	15.5891	38.9718	60.8357	131.664	95.7299
1823	ENSG00000102401	ARMCX3	162.696	-0.307238	0.457357	-0.671768	0.501731	0.975317	124.713	197.936	205.583	123.975	161.275
1824	ENSG00000102409	BEX4	7.04494	-0.897977	1.62603	-0.55225	0.580777	0.975317	9.92034	4.10229	11.8874	6.72735	2.58729
1825	ENSG00000102445	RUBCNL	1.51972	-3.92965	4.12634	-0.952334	0.340928	0.975317	0	4.10229	3.49631	0	0
1826	ENSG00000102452	NALCN	2.13509	2.64786	3.59112	0.737335	0.460919	0.975317	0	2.05115	0	0	8.62431
1827	ENSG00000102524	TNFSF13B	0.419557	-2.12174	4.518	-0.46962	0.638627	0.975317	0	0	2.09778	0	0
1828	ENSG00000102543	CDADC1	20.6656	-0.667944	1.05194	-0.634965	0.525452	0.975317	45.3501	14.358	13.286	18.26	12.074
1829	ENSG00000102547	CAB39L	3.25138	-0.813569	2.46581	-0.32994	0.741445	0.975317	0	6.15344	5.59409	1.9221	2.58729
1830	ENSG00000102572	STK24	11.7196	-1.94794	1.79776	-1.08354	0.278569	0.975317	0	31.7928	18.1808	0	8.62431
1831	ENSG00000102575	ACP5	0.517459	2.81139	4.41159	0.637272	0.523948	0.975317	0	0	0	0	2.58729
1832	ENSG00000102580	DNAJC3	149.082	-0.456792	0.459158	-0.994848	0.31981	0.975317	206.91	125.12	169.921	120.131	123.328
1833	ENSG00000102595	UGGT2	63.4421	0.236766	0.612004	0.386871	0.698852	0.975317	73.694	48.2019	55.9409	80.7282	58.6453
1834	ENSG00000102606	ARHGEF7	21.2565	-0.333043	1.28865	-0.258443	0.796065	0.975317	0	42.0485	27.2712	24.0263	12.9365
1835	ENSG00000102699	PARP4	22.2675	0.758568	0.985264	0.769913	0.441351	0.975317	7.08596	22.5626	22.3764	31.7147	27.5978
1836	ENSG00000102738	MRPS31	62.9228	0.219784	0.690086	0.318489	0.750114	0.975317	52.4361	38.9718	85.3099	99.9492	37.947
1837	ENSG00000102743	SLC25A15	7.61699	1.32612	2.01	0.659762	0.509407	0.975317	0	0	13.9852	16.3379	7.76188
1838	ENSG00000102753	KPNA3	211.904	-0.258142	0.465863	-0.554115	0.5795	0.975317	313.199	239.984	127.965	182.6	195.772
1839	ENSG00000102755	FLT1	128.607	0.488966	0.494294	0.989221	0.322555	0.975317	70.8596	129.222	131.461	152.807	158.687
1840	ENSG00000102760	RGCC	0.344973	2.22873	4.4526	0.500545	0.616691	0.975317	0	0	0	0	1.72486
1841	ENSG00000102763	VWA8	9.57154	-1.00821	1.72618	-0.584071	0.559172	0.975317	29.761	0	6.29335	5.7663	6.03702
1842	ENSG00000102780	DGKH	74.5165	-0.387511	0.589764	-0.657061	0.511142	0.975317	102.038	91.276	53.8431	62.4683	62.9575
1843	ENSG00000102804	TSC22D1	115.009	-0.221005	0.51869	-0.426084	0.670047	0.975317	151.64	136.401	78.3173	92.2608	116.428
1844	ENSG00000102805	CLN5	16.1221	-0.359324	1.38617	-0.259221	0.795464	0.975317	0	27.6905	25.1734	18.26	9.48675
1845	ENSG00000102858	MGRN1	27.0884	0.294555	0.977519	0.301329	0.763164	0.975317	9.92034	19.4859	44.7527	17.2989	43.984
1846	ENSG00000102870	ZNF629	58.1914	0.363526	0.623757	0.5828	0.560028	0.975317	45.3501	50.2531	60.8357	58.6241	75.894
1847	ENSG00000102871	TRADD	27.4931	-0.585839	1.02546	-0.571294	0.5678	0.975317	39.6814	5.12786	50.3468	17.2989	25.0105
1848	ENSG00000102878	HSF4	0.279705	-1.6707	4.54204	-0.36783	0.713	0.975317	0	0	1.39852	0	0
1849	ENSG00000102882	MAPK3	51.492	0.160066	0.669672	0.239022	0.811089	0.975317	62.3564	39.9973	45.452	43.2473	66.4072
1850	ENSG00000102890	ELMO3	2.69094	5.18325	3.56196	1.45517	0.145623	0.975317	0	0	0	13.4547	0
1851	ENSG00000102893	PHKB	56.157	-1.15674	0.71901	-1.6088	0.10766	0.975317	29.761	101.532	84.6106	35.5589	29.3227
1852	ENSG00000102897	LYRM1	31.0309	0.443563	0.824307	0.538105	0.590505	0.975317	31.1782	30.7672	19.5793	45.1694	28.4602
1853	ENSG00000102898	NUTF2	391.386	-0.225045	0.421988	-0.533298	0.593828	0.975317	616.478	380.487	250.336	343.095	366.533
1854	ENSG00000102901	CENPT	18.0174	0.282979	1.05882	0.267257	0.789271	0.975317	14.1719	10.2557	25.1734	16.3379	24.1481
1855	ENSG00000102908	NFAT5	69.2517	-0.244853	0.693045	-0.3533	0.723864	0.975317	80.7799	26.6649	113.98	56.702	68.1321
1856	ENSG00000102910	LONP2	138.472	0.778907	0.5333	1.46054	0.144141	0.975317	70.8596	78.9691	172.018	215.275	155.238
1857	ENSG00000102921	N4BP1	27.8642	1.12106	0.86354	1.29822	0.194213	0.975317	21.2579	15.3836	20.2786	29.7926	52.6083
1858	ENSG00000102924	CBLN1	0.559409	-2.52373	4.49154	-0.561885	0.574194	0.975317	0	0	2.79705	0	0
1859	ENSG00000102962	CCL22	0.139852	-1.09577	4.56092	-0.240253	0.810134	0.975317	0	0	0.699261	0	0
1860	ENSG00000102967	DHODH	3.95689	-5.29124	2.9741	-1.77911	0.0752223	0.975317	8.50315	11.2813	0	0	0
1861	ENSG00000102974	CTCF	375.205	-0.815318	0.430784	-1.89264	0.0584061	0.975317	643.405	458.431	259.426	293.12	221.645
1862	ENSG00000102977	ACD	4.62343	3.74803	2.33184	1.60733	0.107982	0.975317	0	0	2.09778	11.5326	9.48675
1863	ENSG00000102978	POLR2C	7.4506	1.21928	1.85145	0.658555	0.510182	0.975317	0	1.02557	13.286	13.4547	9.48675
1864	ENSG00000102981	PARD6A	1.49391	-0.975246	3.74561	-0.26037	0.794578	0.975317	0	2.05115	3.49631	1.9221	0
1865	ENSG00000102984	ZNF821	3.24089	-1.27119	3.13581	-0.40538	0.685198	0.975317	12.7547	0	0	0	3.44973
1866	ENSG00000102996	MMP15	0.559409	-2.52373	4.49154	-0.561885	0.574194	0.975317	0	0	2.79705	0	0
1867	ENSG00000103005	USB1	8.64147	1.07123	1.73856	0.616159	0.53779	0.975317	0	12.3069	5.59409	2.88315	22.4232
1868	ENSG00000103018	CYB5B	28.2424	1.14236	1.15648	0.987791	0.323255	0.975317	0	17.4347	39.1586	34.5978	50.021
1869	ENSG00000103021	CCDC113	3.44988	-3.5149	3.02178	-1.16319	0.244753	0.975317	15.5891	0	0.699261	0.96105	0
1870	ENSG00000103024	NME3	5.05037	-1.50647	2.36596	-0.636727	0.524303	0.975317	12.7547	0	7.69188	4.80525	0
1871	ENSG00000103034	NDRG4	9.27509	-1.91768	1.94477	-0.98607	0.324099	0.975317	24.0923	0	15.3838	0	6.89945
1872	ENSG00000103035	PSMD7	296.622	-0.240931	0.394255	-0.611105	0.54113	0.975317	333.04	367.155	248.238	319.069	215.608
1873	ENSG00000103037	SETD6	17.5767	-1.46279	1.11291	-1.31439	0.188716	0.975317	35.4298	23.5882	11.8874	5.7663	11.2116
1874	ENSG00000103042	SLC38A7	53.0332	-0.276865	0.819849	-0.337703	0.735587	0.975317	18.4235	78.9691	73.4224	20.1821	74.1691
1875	ENSG00000103043	VAC14	6.20371	3.29684	1.91186	1.72441	0.0846334	0.975317	2.83438	0	1.39852	17.2989	9.48675
1876	ENSG00000103047	TANGO6	8.89636	-0.651164	1.5311	-0.425291	0.670625	0.975317	9.92034	16.4092	4.89483	11.5326	1.72486
1877	ENSG00000103051	COG4	51.053	-0.34832	0.694471	-0.501561	0.615976	0.975317	48.1845	37.9462	81.1143	50.9357	37.0846
1878	ENSG00000103061	SLC7A6OS	3.30049	-5.04359	3.12327	-1.61484	0.106345	0.975317	0	12.3069	4.19557	0	0
1879	ENSG00000103064	SLC7A6	7.75794	2.52139	1.92317	1.31106	0.189837	0.975317	0	0	7.69188	17.2989	13.7989
1880	ENSG00000103067	ESRP2	1.48532	3.22988	4.14882	0.778505	0.436271	0.975317	0	0	0.699261	6.72735	0
1881	ENSG00000103091	WDR59	14.2045	0.395226	1.39212	0.283902	0.776485	0.975317	4.25158	10.2557	23.0756	31.7147	1.72486
1882	ENSG00000103121	CMC2	9.09149	0.520896	1.67246	0.311454	0.755455	0.975317	9.92034	0	13.286	6.72735	15.5238
1883	ENSG00000103126	AXIN1	7.68009	1.55931	1.70043	0.917008	0.359139	0.975317	0	7.17901	5.59409	14.4158	11.2116
1884	ENSG00000103145	HCFC1R1	50.3157	0.27732	0.665407	0.416768	0.676848	0.975317	36.847	48.2019	53.8431	64.3904	48.2962
1885	ENSG00000103148	NPRL3	7.03179	-3.6588	1.92685	-1.89885	0.0575841	0.975317	11.3375	12.3069	9.78966	0	1.72486
1886	ENSG00000103150	MLYCD	3.28618	-1.1548	3.08584	-0.374224	0.708237	0.975317	0	0	12.5867	3.8442	0
1887	ENSG00000103160	HSDL1	16.6195	0.56829	1.18041	0.481432	0.630209	0.975317	2.83438	20.5115	18.1808	26.9094	14.6613
1888	ENSG00000103168	TAF1C	0.344973	2.22873	4.4526	0.500545	0.616691	0.975317	0	0	0	0	1.72486
1889	ENSG00000103174	NAGPA	6.37187	-0.871618	2.05142	-0.424885	0.670921	0.975317	0	20.5115	2.79705	7.6884	0.862431
1890	ENSG00000103175	WFDC1	51.2317	0.874887	0.667181	1.31132	0.18975	0.975317	26.9266	48.2019	39.8579	73.0398	68.1321
1891	ENSG00000103187	COTL1	112.763	1.34771	0.610183	2.2087	0.0271955	0.975317	87.8659	41.0229	80.4151	84.5724	269.941
1892	ENSG00000103194	USP10	135.03	-0.184314	0.46899	-0.393002	0.694318	0.975317	164.394	144.606	116.777	144.158	105.217
1893	ENSG00000103196	CRISPLD2	7.7359	0.792728	1.76131	0.450078	0.652654	0.975317	5.66877	1.02557	11.1882	0.96105	19.8359
1894	ENSG00000103202	NME4	113.512	-0.487987	0.537629	-0.907665	0.364055	0.975317	79.3627	161.015	144.048	70.1567	112.979
1895	ENSG00000103222	ABCC1	14.3307	-0.949871	1.24091	-0.765464	0.443995	0.975317	11.3375	17.4347	24.4741	2.88315	15.5238
1896	ENSG00000103227	LMF1	3.60571	1.94248	2.62179	0.7409	0.458754	0.975317	0	0	4.89483	1.9221	11.2116
1897	ENSG00000103241	FOXF1	24.9582	-0.590231	0.981826	-0.601156	0.547736	0.975317	9.92034	37.9462	38.4594	13.4547	25.0105
1898	ENSG00000103245	CIAO3	6.27221	-0.992007	2.08694	-0.475342	0.634544	0.975317	0	1.02557	22.3764	1.9221	6.03702
1899	ENSG00000103248	MTHFSD	2.81102	-3.30937	3.09099	-1.07065	0.284327	0.975317	0	4.10229	9.0904	0	0.862431
1900	ENSG00000103253	HAGHL	18.5897	-0.503064	1.08468	-0.463789	0.642799	0.975317	11.3375	30.7672	20.9778	22.1042	7.76188
1901	ENSG00000103257	SLC7A5	47.5316	1.06344	0.750447	1.41707	0.156463	0.975317	22.6751	21.537	54.5424	50.9357	87.968
1902	ENSG00000103260	METRN	39.2475	-2.00807	0.828084	-2.42496	0.0153102	0.975317	89.2831	42.0485	37.0609	19.221	8.62431
1903	ENSG00000103269	RHBDL1	0.279705	-1.6707	4.54204	-0.36783	0.713	0.975317	0	0	1.39852	0	0
1904	ENSG00000103274	NUBP1	0.344973	2.22873	4.4526	0.500545	0.616691	0.975317	0	0	0	0	1.72486
1905	ENSG00000103275	UBE2I	209.226	-0.186576	0.453115	-0.411762	0.680514	0.975317	308.948	208.191	143.349	211.431	174.211
1906	ENSG00000103310	ZP2	0.689945	3.22521	4.3909	0.734521	0.462631	0.975317	0	0	0	0	3.44973
1907	ENSG00000103313	MEFV	2.26751	-4.47861	3.99692	-1.12051	0.262494	0.975317	11.3375	0	0	0	0
1908	ENSG00000103316	CRYM	0.279705	-1.6707	4.54204	-0.36783	0.713	0.975317	0	0	1.39852	0	0
1909	ENSG00000103319	EEF2K	10.7166	2.80909	1.61667	1.73758	0.0822851	0.975317	5.66877	4.10229	0	6.72735	37.0846
1910	ENSG00000103326	CAPN15	10.639	1.5041	1.4831	1.01416	0.310507	0.975317	1.41719	4.10229	12.5867	5.7663	29.3227
1911	ENSG00000103335	PIEZO1	10.6763	-0.726636	1.73487	-0.418841	0.675332	0.975317	35.4298	0	2.79705	4.80525	10.3492
1912	ENSG00000103356	EARS2	24.883	-0.658011	1.05396	-0.624322	0.532416	0.975317	48.1845	5.12786	34.2638	14.4158	22.4232
1913	ENSG00000103363	ELOB	261.255	0.782888	0.432347	1.81078	0.0701742	0.975317	154.474	154.861	297.885	332.523	366.533
1914	ENSG00000103381	CPPED1	12.1016	0.791827	1.4828	0.534008	0.593336	0.975317	0	8.20458	19.5793	16.3379	16.3862
1915	ENSG00000103404	USP31	3.74837	-0.698978	2.18131	-0.32044	0.748635	0.975317	9.92034	2.05115	1.39852	1.9221	3.44973
1916	ENSG00000103415	HMOX2	67.0071	0.612412	0.6172	0.992243	0.321079	0.975317	41.0986	79.9947	44.7527	85.5335	83.6559
1917	ENSG00000103429	BFAR	176.117	0.872996	0.576031	1.51554	0.129637	0.975317	49.6017	156.913	188.801	333.484	151.788
1918	ENSG00000103449	SALL1	3.76111	-2.68882	2.4503	-1.09734	0.272491	0.975317	8.50315	7.17901	1.39852	0	1.72486
1919	ENSG00000103460	TOX3	0.344973	2.22873	4.4526	0.500545	0.616691	0.975317	0	0	0	0	1.72486
1920	ENSG00000103479	RBL2	4.83909	-1.55666	2.23325	-0.697037	0.48578	0.975317	15.5891	0	4.19557	0.96105	3.44973
1921	ENSG00000103489	XYLT1	67.0714	0.609331	0.786034	0.775196	0.438224	0.975317	11.3375	49.2275	104.889	67.2735	102.629
1922	ENSG00000103490	PYCARD	33.0323	-0.288214	0.857315	-0.336182	0.736733	0.975317	36.847	37.9462	32.166	12.4937	45.7089
1923	ENSG00000103494	RPGRIP1L	19.1495	-0.423205	1.06179	-0.398579	0.690204	0.975317	21.2579	28.716	13.9852	24.0263	7.76188
1924	ENSG00000103496	STX4	49.0016	-0.211263	0.660867	-0.319675	0.749214	0.975317	52.4361	51.2786	51.7453	49.0136	40.5343
1925	ENSG00000103502	CDIPT	52.3939	0.479844	0.736005	0.651957	0.514429	0.975317	51.0189	17.4347	67.1291	63.4293	62.9575
1926	ENSG00000103507	BCKDK	37.9608	0.589096	0.763343	0.771732	0.440273	0.975317	38.2642	19.4859	37.0609	43.2473	51.7459
1927	ENSG00000103510	KAT8	18.7822	-1.29795	1.26839	-1.02331	0.306161	0.975317	38.2642	30.7672	4.89483	18.26	1.72486
1928	ENSG00000103512	NOMO1	35.8515	0.479077	0.805627	0.594664	0.552068	0.975317	48.1845	27.6905	17.4815	47.0915	38.8094
1929	ENSG00000103528	SYT17	18.7003	-2.8558	1.33214	-2.14377	0.0320516	0.975317	53.8533	12.3069	19.5793	0	7.76188
1930	ENSG00000103540	CCP110	102.494	-0.239804	0.556737	-0.430731	0.666664	0.975317	133.216	135.376	59.4372	91.2998	93.1426
1931	ENSG00000103549	RNF40	12.7303	0.997939	1.30809	0.762896	0.445525	0.975317	14.1719	11.2813	2.09778	24.0263	12.074
1932	ENSG00000103550	KNOP1	118.186	0.164365	0.512429	0.320756	0.748395	0.975317	75.1112	126.145	136.356	148.963	104.354
1933	ENSG00000103642	LACTB	70.1446	0.424378	0.602991	0.703788	0.481565	0.975317	52.4361	55.3809	76.9188	104.754	61.2326
1934	ENSG00000103647	CORO2B	54.8461	-0.169879	0.63686	-0.266745	0.789666	0.975317	53.8533	68.7134	49.6476	52.8578	49.1586
1935	ENSG00000103653	CSK	122.547	-1.0548	0.499943	-2.10984	0.0348723	0.975317	199.824	109.736	154.537	70.1567	78.4813
1936	ENSG00000103671	TRIP4	13.0627	1.34493	1.4692	0.915415	0.359974	0.975317	0	9.23015	14.6845	33.6368	7.76188
1937	ENSG00000103707	MTFMT	1.27339	2.98274	3.9967	0.7463	0.455486	0.975317	0	0	0.699261	4.80525	0.862431
1938	ENSG00000103742	IGDCC4	1.03492	3.80891	4.37007	0.87159	0.383432	0.975317	0	0	0	0	5.17459
1939	ENSG00000103811	CTSH	27.1616	1.44128	1.17139	1.2304	0.218547	0.975317	0	36.9206	11.1882	39.4031	48.2962
1940	ENSG00000103876	FAH	72.8777	-0.765791	0.590663	-1.29649	0.194805	0.975317	111.958	64.6111	85.3099	57.663	44.8464
1941	ENSG00000103888	CEMIP	88.2835	0.453015	0.599574	0.755562	0.449912	0.975317	42.5158	91.276	96.4981	74.0009	137.127
1942	ENSG00000103942	HOMER2	91.535	-0.82804	0.687598	-1.20425	0.228493	0.975317	116.21	175.373	41.2564	90.3387	34.4973
1943	ENSG00000103978	TMEM87A	51.0713	-0.394771	0.881196	-0.447995	0.654157	0.975317	7.08596	60.5088	101.393	43.2473	43.1216
1944	ENSG00000103994	ZNF106	392.145	0.18926	0.351305	0.538735	0.59007	0.975317	303.279	387.666	422.354	408.446	438.978
1945	ENSG00000103995	CEP152	46.6982	0.365285	0.720455	0.507019	0.612141	0.975317	43.9329	38.9718	42.6549	76.884	31.0475
1946	ENSG00000104043	ATP8B4	1.37989	4.22329	4.3596	0.968734	0.332678	0.975317	0	0	0	0	6.89945
1947	ENSG00000104044	OCA2	0.344973	2.22873	4.4526	0.500545	0.616691	0.975317	0	0	0	0	1.72486
1948	ENSG00000104047	DTWD1	32.7712	-0.567617	0.822135	-0.690418	0.489931	0.975317	49.6017	21.537	41.9557	24.0263	26.7354
1949	ENSG00000104064	GABPB1	16.9021	0.839983	1.07026	0.784843	0.432545	0.975317	9.92034	10.2557	18.1808	21.1431	25.0105
1950	ENSG00000104067	TJP1	91.2445	0.197359	0.557248	0.354167	0.723213	0.975317	60.9393	105.634	91.6032	123.014	75.0315
1951	ENSG00000104081	BMF	5.08696	-5.65075	2.75944	-2.04779	0.0405805	0.975317	19.8407	0	5.59409	0	0
1952	ENSG00000104129	DNAJC17	8.15432	0.836876	1.59261	0.525476	0.599253	0.975317	8.50315	1.02557	9.0904	5.7663	16.3862
1953	ENSG00000104131	EIF3J	246.61	0.879605	0.381482	2.30576	0.0211241	0.975317	201.241	158.964	193.695	340.212	338.936
1954	ENSG00000104133	SPG11	36.3942	0.471653	0.78354	0.601952	0.547206	0.975317	22.6751	43.0741	28.6697	54.7799	32.7724
1955	ENSG00000104142	VPS18	86.7127	-0.350244	0.606492	-0.577492	0.563607	0.975317	56.6877	86.1481	141.251	95.144	54.3332
1956	ENSG00000104147	OIP5	3.40126	-5.06503	3.49116	-1.45082	0.146831	0.975317	17.0063	0	0	0	0
1957	ENSG00000104154	SLC30A4	22.2983	0.35342	1.14963	0.307421	0.758523	0.975317	41.0986	17.4347	2.09778	24.9873	25.8729
1958	ENSG00000104164	BLOC1S6	150.138	0.289283	0.521532	0.55468	0.579114	0.975317	162.977	66.6622	183.906	175.872	161.275
1959	ENSG00000104205	SGK3	18.2191	3.07169	1.102	2.78736	0.00531391	0.975317	4.25158	3.07672	6.29335	49.0136	28.4602
1960	ENSG00000104218	CSPP1	126.41	-0.532035	0.540948	-0.983522	0.325351	0.975317	93.5347	203.063	135.657	131.664	68.1321
1961	ENSG00000104219	ZDHHC2	12.9589	0.359412	1.34182	0.267854	0.788812	0.975317	26.9266	4.10229	4.19557	19.221	10.3492
1962	ENSG00000104228	TRIM35	4.09985	0.872887	2.53208	0.344731	0.730297	0.975317	0	0	9.0904	1.9221	9.48675
1963	ENSG00000104231	ZFAND1	9.02385	1.73855	1.43491	1.21161	0.225662	0.975317	4.25158	4.10229	5.59409	9.6105	21.5608
1964	ENSG00000104237	RP1	1.13375	-3.4688	4.45146	-0.779251	0.435832	0.975317	5.66877	0	0	0	0
1965	ENSG00000104290	FZD3	4.19346	2.8011	2.40892	1.1628	0.24491	0.975317	0	0	3.49631	10.5716	6.89945
1966	ENSG00000104299	INTS9	2.24336	-2.86049	3.70856	-0.77132	0.440517	0.975317	0	10.2557	0	0.96105	0
1967	ENSG00000104313	EYA1	0.862431	3.54638	4.37842	0.809969	0.417958	0.975317	0	0	0	0	4.31216
1968	ENSG00000104320	NBN	48.3511	0.475059	0.748528	0.634658	0.525651	0.975317	34.0126	22.5626	68.5276	44.2083	72.4442
1969	ENSG00000104324	CPQ	5.51344	1.76547	1.99635	0.884348	0.376509	0.975317	0	4.10229	4.19557	2.88315	16.3862
1970	ENSG00000104327	CALB1	2.46137	-4.61534	3.8692	-1.19284	0.232932	0.975317	0	12.3069	0	0	0
1971	ENSG00000104331	BPNT2	113.619	0.227742	0.490678	0.464138	0.642549	0.975317	104.872	122.043	92.3025	105.716	143.164
1972	ENSG00000104332	SFRP1	240.648	-0.410665	0.383564	-1.07066	0.284324	0.975317	259.346	299.467	242.644	192.21	209.571
1973	ENSG00000104341	LAPTM4B	16.7245	-0.528396	1.3958	-0.378561	0.705014	0.975317	0	27.6905	29.369	6.72735	19.8359
1974	ENSG00000104356	POP1	124.353	0.798957	0.55844	1.43069	0.152518	0.975317	92.1175	68.7134	126.566	241.224	93.1426
1975	ENSG00000104368	PLAT	47.8119	0.302513	0.843078	0.358819	0.71973	0.975317	11.3375	31.7928	87.4077	49.0136	59.5078
1976	ENSG00000104369	JPH1	3.48695	-5.1178	3.44831	-1.48415	0.137769	0.975317	0	17.4347	0	0	0
1977	ENSG00000104375	STK3	46.5562	0.524953	0.697698	0.752408	0.451806	0.975317	46.7673	28.716	43.3542	68.2346	45.7089
1978	ENSG00000104388	RAB2A	793.285	-0.485734	0.363399	-1.33664	0.18134	0.975317	1062.89	1063.52	561.507	659.28	619.226
1979	ENSG00000104408	EIF3E	98.116	1.08162	0.522097	2.07169	0.0382948	0.975317	69.4424	51.2786	82.5128	152.807	134.539
1980	ENSG00000104412	EMC2	40.5584	-0.990548	0.737072	-1.3439	0.178982	0.975317	42.5158	66.6622	42.6549	25.9484	25.0105
1981	ENSG00000104415	CCN4	29.0084	-0.886701	0.94007	-0.943229	0.345564	0.975317	56.6877	38.9718	11.1882	19.221	18.9735
1982	ENSG00000104427	ZC2HC1A	59.6005	-0.928329	0.747879	-1.24128	0.214501	0.975317	28.3438	71.7901	120.273	24.9873	52.6083
1983	ENSG00000104432	IL7	0.699261	-2.83731	4.47532	-0.63399	0.526088	0.975317	0	0	3.49631	0	0
1984	ENSG00000104435	STMN2	3.85099	1.56754	2.52565	0.620649	0.53483	0.975317	0	0	6.29335	8.64945	4.31216
1985	ENSG00000104442	ARMC1	100.996	-0.181779	0.58682	-0.309769	0.756737	0.975317	138.885	49.2275	130.063	80.7282	106.079
1986	ENSG00000104447	TRPS1	173.686	-0.578483	0.44997	-1.2856	0.198581	0.975317	265.015	147.682	188.101	128.781	138.851
1987	ENSG00000104490	NCALD	0.689945	3.22521	4.3909	0.734521	0.462631	0.975317	0	0	0	0	3.44973
1988	ENSG00000104497	SNX16	2.45225	-2.99102	3.25431	-0.919096	0.358045	0.975317	8.50315	0	2.79705	0.96105	0
1989	ENSG00000104517	UBR5	233.921	-0.565364	0.401661	-1.40757	0.15926	0.975317	328.789	247.163	230.756	199.898	163
1990	ENSG00000104518	GSDMD	21.2637	-0.660766	0.989397	-0.667847	0.504231	0.975317	21.2579	31.7928	21.6771	22.1042	9.48675
1991	ENSG00000104522	GFUS	108.703	0.293116	0.577048	0.507957	0.611484	0.975317	45.3501	123.069	130.063	101.871	143.164
1992	ENSG00000104524	PYCR3	17.3927	1.31657	1.29561	1.01618	0.309542	0.975317	0	11.2813	20.9778	28.8315	25.8729
1993	ENSG00000104549	SQLE	77.5491	0.386614	0.612139	0.631578	0.527662	0.975317	51.0189	47.1763	108.386	84.5724	96.5923
1994	ENSG00000104611	SH2D4A	39.9609	0.265272	0.762239	0.348018	0.727827	0.975317	19.8407	50.2531	40.5572	45.1694	43.984
1995	ENSG00000104613	INTS10	23.641	0.738814	1.08684	0.679782	0.496642	0.975317	18.4235	3.07672	34.2638	20.1821	42.2591
1996	ENSG00000104626	ERI1	15.7762	-0.377435	1.14388	-0.32996	0.74143	0.975317	8.50315	24.6137	18.8801	18.26	8.62431
1997	ENSG00000104635	SLC39A14	21.6624	0.415885	1.10996	0.374683	0.707896	0.975317	19.8407	3.07672	34.2638	19.221	31.91
1998	ENSG00000104643	MTMR9	123.23	-0.305217	0.519952	-0.587009	0.557198	0.975317	194.155	104.608	102.092	89.3777	125.915
1999	ENSG00000104660	LEPROTL1	83.0145	-0.285538	0.69893	-0.408536	0.68288	0.975317	165.811	73.8412	29.369	70.1567	75.894
[truncated: 60,704 more rows]

## Sheet: CBD 3uM_6h
	gene	Gene_name	baseMean	log2FoldChange	lfcSE	stat	pvalue	padj	K34	K35	K36	K16	K17
1	ENSG00000108518	PFN1	178.772	3.81845	0.528386	7.22662	4.95156e-13	7.76404e-10	27.9484	12.8428	44.0666	277.488	531.514
2	ENSG00000198712	MT-CO2	4107.16	2.33015	0.321695	7.24334	4.37757e-13	7.76404e-10	1066.45	1757.33	1891.97	9375.88	6444.17
3	ENSG00000240950	0	303.931	-2.57716	0.451867	-5.70337	1.17465e-08	1.2279e-05	653.111	488.028	226.112	73.2025	79.1992
4	ENSG00000131469	RPL27	263.425	1.97331	0.358374	5.50628	3.66497e-08	2.87333e-05	125.032	134.85	104.748	457.941	494.555
5	ENSG00000232128	MTCO3P45	1887.97	-2.1205	0.389251	-5.44764	5.10419e-08	3.20135e-05	3931.9	2938.87	1314.77	640.947	613.354
6	ENSG00000148303	RPL7A	240.776	2.30941	0.427381	5.40364	6.53003e-08	3.41303e-05	57.3679	136.99	84.5211	438.364	486.635
7	ENSG00000213741	RPS29	292.812	2.12797	0.398163	5.34447	9.06835e-08	4.06262e-05	91.2002	101.673	179.156	547.316	544.714
8	ENSG00000125378	BMP4	471.009	-2.015	0.385676	-5.22459	1.74543e-07	5.47368e-05	929.653	680.671	411.77	172.792	160.158
9	ENSG00000130227	XPO7	508.383	-2.01426	0.385264	-5.22827	1.71106e-07	5.47368e-05	1025.27	708.497	448.612	193.22	166.318
10	ENSG00000196923	PDLIM7	3024.07	-1.76988	0.337132	-5.24982	1.52251e-07	5.47368e-05	5735.31	4322.69	2590.54	1198.48	1273.35
11	ENSG00000235137	HSP90AB6P	305.971	-2.50249	0.484525	-5.16484	2.4065e-07	6.8607e-05	709.008	448.429	211.664	60.4346	100.319
12	ENSG00000231434	HSP90AA3P	805.753	-2.18295	0.429452	-5.08311	3.71298e-07	9.56707e-05	1653.37	1368.83	491.234	244.292	271.037
13	ENSG00000243680	RPL37P23	834.538	-2.01394	0.397181	-5.07059	3.96594e-07	9.56707e-05	1685.73	1275.72	620.544	253.655	337.036
14	ENSG00000126457	PRMT1	955.457	-1.93201	0.386482	-4.99896	5.76412e-07	0.000120509	1928.44	1426.63	712.289	344.733	365.196
15	ENSG00000227836	0	2596.79	-2.01466	0.402887	-5.00055	5.71656e-07	0.000120509	5192.53	4349.44	1603.73	860.555	977.67
16	ENSG00000225482	RPS6P14	357.695	-2.33092	0.468444	-4.97589	6.49493e-07	0.000127301	797.266	549.032	233.336	121.72	87.1191
17	ENSG00000156976	EIF4A2	141.903	-2.42979	0.495316	-4.90554	9.31705e-07	0.000171872	239.768	269.7	122.086	36.6012	41.3596
18	ENSG00000230175	0	604.647	-2.08175	0.426008	-4.88664	1.02569e-06	0.000178698	1167.95	1043.48	400.934	236.631	174.238
19	ENSG00000137309	HMGA1	636.719	1.61717	0.334057	4.84099	1.29191e-06	0.000213234	282.426	308.228	452.947	940.567	1199.43
20	ENSG00000264316	MTCO3P13	1069.82	-1.90261	0.394913	-4.81778	1.45163e-06	0.000227616	2237.35	1540.07	762.857	412.828	395.996
21	ENSG00000111667	USP5	356.317	-1.8258	0.383347	-4.76277	1.90951e-06	0.000260357	656.053	500.871	343.141	158.322	123.199
22	ENSG00000228224	NACA4P	2189.82	-1.84888	0.387493	-4.7714	1.82953e-06	0.000260357	4373.2	3373.39	1493.21	769.477	939.83
23	ENSG00000228657	RPL23AP58	385.748	-2.20025	0.461331	-4.76935	1.84826e-06	0.000260357	794.324	657.126	233.336	124.274	119.679
24	ENSG00000159840	ZYX	98.7266	2.40757	0.509882	4.72182	2.33746e-06	0.000286604	32.3614	31.0369	44.789	155.768	229.678
25	ENSG00000226110	0	453.062	-2.10993	0.446904	-4.7212	2.34454e-06	0.000286604	960.544	709.567	292.573	132.786	169.838
26	ENSG00000242137	RPL11P5	207.375	-2.59224	0.549382	-4.71848	2.37618e-06	0.000286604	457.472	374.583	101.859	51.9227	51.0395
27	ENSG00000102316	MAGED2	1289.4	-1.62134	0.345189	-4.69697	2.64044e-06	0.00029573	2319.72	1893.25	1086.49	545.614	601.914
28	ENSG00000215369	RPL37P3	139.029	-2.3995	0.510617	-4.69921	2.61173e-06	0.00029573	272.13	233.312	111.972	43.4108	34.3196
29	ENSG00000182492	BGN	936.473	-1.6773	0.361836	-4.63553	3.56021e-06	0.000384994	1728.39	1389.17	757.801	414.53	392.476
30	ENSG00000233839	0	549.212	-2.13114	0.462443	-4.60844	4.05697e-06	0.000424089	1341.53	699.935	342.419	193.22	168.958
31	ENSG00000102265	TIMP1	2738.91	1.3953	0.308002	4.53017	5.89358e-06	0.000596203	1407.72	1315.32	2248.12	4445.77	4277.63
32	ENSG00000153885	KCTD15	329.252	-1.7366	0.38402	-4.52216	6.12117e-06	0.000599875	556.027	504.082	312.078	118.316	155.758
33	ENSG00000168487	BMP1	340.824	-1.92741	0.428799	-4.4949	6.96043e-06	0.000647667	608.982	595.052	246.339	120.869	132.879
34	ENSG00000225443	RPL36AP27	464.285	-1.94235	0.432304	-4.49302	7.0219e-06	0.000647667	866.402	799.467	312.8	143	199.758
35	ENSG00000090238	YPEL3	135.955	-2.39872	0.536443	-4.47153	7.76621e-06	0.000695852	263.304	247.225	93.19	40.8572	35.1996
36	ENSG00000139329	LUM	1448.71	-1.86756	0.419576	-4.45107	8.54418e-06	0.000744293	3231.72	1997.06	896.502	552.423	565.834
37	ENSG00000244053	RPL13AP2	326.882	-2.22105	0.502127	-4.42329	9.72109e-06	0.000823928	656.053	590.771	183.49	131.935	72.1592
38	ENSG00000130522	JUND	386.305	-1.75751	0.398052	-4.41527	1.00886e-05	0.000832573	750.195	539.399	324.359	159.173	158.398
39	ENSG00000197956	S100A6	791.817	1.29585	0.294318	4.4029	1.06814e-05	0.000858893	486.891	577.928	437.054	1188.26	1268.95
40	ENSG00000230629	RPS23P8	557.732	-2.07434	0.473003	-4.38546	1.15742e-05	0.000907418	1297.4	812.31	298.352	194.923	185.678
41	ENSG00000179031	NSA2P3	207.452	-2.4438	0.558498	-4.37567	1.21061e-05	0.000925966	536.904	271.84	115.584	43.4108	69.5193
42	ENSG00000167535	CACNB3	257.917	-1.83071	0.42161	-4.3422	1.41065e-05	0.00105329	398.633	444.148	243.45	75.756	127.599
43	ENSG00000144810	COL8A1	879.88	-1.60728	0.374156	-4.29574	1.74113e-05	0.00126981	1709.27	1212.58	688.45	397.506	391.596
44	ENSG00000171812	COL8A2	495.178	-1.92918	0.450182	-4.28533	1.82471e-05	0.00130052	1056.16	754.517	296.908	194.072	174.238
45	ENSG00000169715	MT1E	163.744	2.05802	0.483054	4.26043	2.04034e-05	0.00142189	42.6581	58.863	113.417	308.983	294.797
46	ENSG00000174444	RPL4	224.32	1.56658	0.369385	4.24103	2.22495e-05	0.00151684	117.678	142.342	117.029	361.756	382.796
47	ENSG00000243759	ST13P15	174.557	-2.094	0.49539	-4.22697	2.36861e-05	0.00158041	386.865	231.171	137.257	64.6906	52.7994
48	ENSG00000102225	CDK16	578.38	-1.55921	0.373002	-4.18017	2.91296e-05	0.00187335	1041.45	846.558	471.007	271.53	261.357
49	ENSG00000240038	AMY2B	3039.44	-1.56752	0.375088	-4.17906	2.92711e-05	0.00187335	5638.23	4699.41	2069.68	1265.72	1524.14
50	ENSG00000187957	DNER	155.188	-1.99641	0.479204	-4.1661	3.09856e-05	0.00194342	233.884	299.666	131.477	51.0715	59.8394
51	ENSG00000125354	SEPTIN6	191.669	-1.69183	0.40798	-4.14684	3.37094e-05	0.0020728	317.73	273.981	202.995	79.1608	84.4791
52	ENSG00000275052	PPP4R3B	327.596	-1.92415	0.465357	-4.13478	3.55289e-05	0.00214267	664.879	528.697	200.106	114.06	130.239
53	ENSG00000104973	MED25	222.686	-1.7132	0.415945	-4.11882	3.8082e-05	0.00217137	391.278	330.703	203.718	95.3335	92.399
54	ENSG00000126814	TRMT5	419.789	-1.75196	0.424776	-4.12443	3.71657e-05	0.00217137	763.434	705.286	283.904	167.685	178.638
55	ENSG00000214047	RPS11P7	838.416	-1.75071	0.424978	-4.11954	3.79635e-05	0.00217137	1787.23	1194.38	517.963	339.625	352.876
56	ENSG00000140443	IGF1R	413.421	-1.54829	0.378166	-4.0942	4.23632e-05	0.00237234	681.059	653.915	348.921	195.774	187.438
57	ENSG00000171552	BCL2L1	280.356	-1.60267	0.392648	-4.08171	4.4705e-05	0.00245956	450.117	425.954	273.791	148.959	102.959
58	ENSG00000227081	0	757.405	-1.27329	0.31296	-4.06854	4.73079e-05	0.00255789	1167.95	1040.27	760.69	398.358	419.756
59	ENSG00000100097	LGALS1	24937.5	-1.4159	0.348912	-4.05806	4.94829e-05	0.00258631	46310.6	34726	18726.1	11373.6	13551
60	ENSG00000132005	RFX1	316.037	-1.95255	0.480905	-4.06016	4.90392e-05	0.00258631	604.569	568.296	175.544	120.018	111.759
61	ENSG00000204262	COL5A2	3385.74	-1.47391	0.363744	-4.05204	5.07738e-05	0.00261027	6298.7	4959.48	2394.77	1625.78	1649.98
62	ENSG00000111540	RAB5B	162.761	-1.88694	0.468668	-4.02617	5.66928e-05	0.00278382	336.852	192.643	160.373	56.1786	67.7593
63	ENSG00000140564	FURIN	380.003	-1.74333	0.433053	-4.02567	5.68127e-05	0.00278382	753.137	572.577	259.343	158.322	156.638
64	ENSG00000171992	SYNPO	1101.93	-1.61728	0.401112	-4.03199	5.53061e-05	0.00278382	2107.9	1714.52	704.343	470.709	512.155
65	ENSG00000079432	CIC	550.611	-1.48622	0.370016	-4.01663	5.90367e-05	0.00284829	1004.67	748.096	471.729	243.441	285.117
66	ENSG00000226242	RPS17P8	739.761	-1.79265	0.446779	-4.01238	6.01085e-05	0.00285606	1281.22	1422.35	398.766	264.721	331.757
67	ENSG00000225137	DYNC1I2P1	201.152	-2.12242	0.530314	-4.0022	6.27562e-05	0.00293736	488.362	264.349	119.919	70.6489	62.4793
68	ENSG00000175048	ZDHHC14	133.226	-1.81669	0.455176	-3.99119	6.57417e-05	0.00300844	201.523	201.205	157.484	42.5596	63.3593
69	ENSG00000216412	RPL12P2	2017.75	-1.54307	0.387108	-3.98615	6.71527e-05	0.00300844	3884.83	2989.17	1337.17	841.828	1035.75
70	ENSG00000242706	RPS27AP9	231.208	-2.05166	0.514508	-3.98761	6.67417e-05	0.00300844	548.672	306.088	141.591	91.9287	67.7593
71	ENSG00000114439	BBX	951.92	-1.30239	0.32725	-3.9798	6.89733e-05	0.00304648	1419.49	1476.93	850.991	514.12	498.075
72	ENSG00000091656	ZFHX4	610.134	-1.62665	0.410265	-3.96487	7.34362e-05	0.00319855	1153.24	950.371	405.99	263.869	277.197
73	ENSG00000164104	HMGB2	674.538	-1.50107	0.37942	-3.95624	7.61394e-05	0.00320837	1235.62	971.775	523.02	289.405	352.876
74	ENSG00000228453	RPS15AP9	213.685	-2.01717	0.51011	-3.95439	7.67308e-05	0.00320837	407.459	389.566	120.641	69.7977	80.9591
75	ENSG00000278487	0	338.429	-1.92741	0.486835	-3.95906	7.52462e-05	0.00320837	772.26	477.326	190.714	125.125	126.719
76	ENSG00000260109	0	186.791	-1.93269	0.489557	-3.94785	7.88571e-05	0.00325389	417.756	233.312	144.481	70.6489	67.7593
77	ENSG00000259160	0	226.456	-2.07606	0.526348	-3.94427	8.00418e-05	0.00325988	460.414	403.479	114.14	70.6489	83.5991
78	ENSG00000131507	NDFIP1	457.406	-1.48654	0.377655	-3.93624	8.27672e-05	0.00332767	791.382	679.601	377.094	212.798	226.158
79	ENSG00000237205	RPL7P34	179.271	-2.03778	0.518774	-3.92807	8.56288e-05	0.00339914	329.497	332.844	109.083	52.7739	72.1592
80	ENSG00000228519	RANBP1P1	103.685	-2.46157	0.628269	-3.91802	8.928e-05	0.00349978	229.471	161.606	71.5179	14.4703	41.3596
81	ENSG00000074590	NUAK1	400.912	-1.67039	0.428609	-3.89724	9.72933e-05	0.00376681	786.969	595.052	275.958	160.024	186.558
82	ENSG00000100345	MYH9	14901	-1.38502	0.357236	-3.87704	0.000105736	0.00404374	27261.5	21534.2	10559.4	6950.83	8198.87
83	ENSG00000177666	PNPLA2	270.136	-1.58537	0.409893	-3.86776	0.00010984	0.00414826	463.356	400.269	242.005	143.851	101.199
84	ENSG00000198888	MT-ND1	1561.33	1.25874	0.325682	3.86495	0.000111114	0.00414826	759.021	1267.16	981.023	2913.63	1885.82
85	ENSG00000164366	CCDC127	117.942	-1.95469	0.508868	-3.84125	0.00012241	0.00451623	197.11	202.275	104.026	50.2203	36.0796
86	ENSG00000225779	0	104.32	-2.55267	0.665511	-3.83565	0.000125233	0.00456665	198.581	223.68	46.2338	17.0238	36.0796
87	ENSG00000071575	TRIB2	225.227	-1.82082	0.475564	-3.82876	0.000128788	0.00457371	360.388	437.727	149.537	82.5656	95.919
88	ENSG00000102317	RBM3	696.659	1.20209	0.313871	3.82988	0.000128205	0.00457371	350.091	484.817	538.19	1041.01	1069.19
89	ENSG00000121440	PDZRN3	92.4835	-2.32082	0.606459	-3.82683	0.000129802	0.00457371	189.755	149.833	68.6283	36.6012	17.5998
90	ENSG00000113657	DPYSL3	1020.37	-1.50987	0.395236	-3.82016	0.000133364	0.00460596	2054.95	1378.47	701.453	497.947	469.035
91	ENSG00000170340	B3GNT2	138.21	-1.86445	0.488123	-3.81962	0.000133655	0.00460596	223.588	240.803	119.919	44.262	62.4793
92	ENSG00000131051	RBM39	2447.83	-1.27553	0.33441	-3.81427	0.000136587	0.00465584	4104.01	3545.7	1947.6	1322.75	1319.11
93	ENSG00000177352	CCDC71	171.31	-1.79395	0.470861	-3.80994	0.000138999	0.00468712	335.381	244.014	139.424	64.6906	73.0392
94	ENSG00000090621	PABPC4	516.44	1.19143	0.314371	3.78987	0.000150725	0.00500822	288.31	382.075	352.533	834.168	725.112
95	ENSG00000118523	CCN2	160.903	1.6169	0.426822	3.78824	0.000151716	0.00500822	76.4905	86.6892	100.414	216.203	324.717
96	ENSG00000105576	TNPO2	1066.91	-1.26544	0.334934	-3.77818	0.000157978	0.0051606	1722.51	1544.35	910.228	537.953	619.513
97	ENSG00000134871	COL4A2	202.197	1.62894	0.432901	3.76285	0.000167989	0.00543106	79.4324	90.9702	158.206	378.78	303.597
98	ENSG00000100626	GALNT16	272.555	-1.65745	0.44098	-3.75855	0.000170898	0.00546874	514.84	414.182	196.494	114.06	123.199
99	ENSG00000172379	ARNT2	157.547	-1.94086	0.518497	-3.74324	0.000181661	0.0056969	330.968	234.382	106.193	51.0715	65.1193
100	ENSG00000213791	0	2792.84	-1.55865	0.416389	-3.74326	0.000181647	0.0056969	5495.55	4310.91	1581.34	1073.35	1503.02
101	ENSG00000078401	EDN1	129.312	-2.22337	0.596123	-3.72972	0.000191695	0.00595205	269.188	235.452	61.4042	39.1548	41.3596
102	ENSG00000102081	FMR1	197.576	-1.55076	0.417962	-3.71028	0.000207026	0.00619651	326.555	292.175	186.38	85.9703	96.799
103	ENSG00000131016	AKAP12	889.414	1.16842	0.314558	3.71448	0.000203623	0.00619651	488.362	525.486	764.302	1251.25	1417.67
104	ENSG00000226532	0	1577.57	-1.5435	0.415961	-3.71069	0.000206696	0.00619651	2816.91	2689.51	913.84	604.346	863.271
105	ENSG00000235379	RPL7P31	795.561	-1.67503	0.451523	-3.70974	0.000207473	0.00619651	1657.78	1221.14	412.492	364.31	322.077
106	ENSG00000099956	SMARCB1	201.879	-1.87676	0.507593	-3.69737	0.000217842	0.00644485	461.885	244.014	148.815	57.881	96.799
107	ENSG00000149269	PAK1	550.321	-1.71179	0.464612	-3.68434	0.0002293	0.00672041	1137.06	861.541	288.239	204.286	260.477
108	ENSG00000134013	LOXL2	141.281	1.66659	0.45356	3.67447	0.000238339	0.00679484	52.9549	72.7761	99.6916	245.143	235.838
109	ENSG00000198763	MT-ND2	3365.15	1.12161	0.305071	3.67656	0.000236398	0.00679484	2154.97	2606.03	2105.08	6296.26	3663.4
110	ENSG00000240463	RPS19P3	3421.11	-1.47693	0.401715	-3.67656	0.0002364	0.00679484	6457.56	5384.36	1959.16	1635.99	1668.46
111	ENSG00000058262	SEC61A1	1987.65	-1.38854	0.378771	-3.66592	0.000246452	0.00696281	3621.53	2978.47	1322	931.204	1085.03
112	ENSG00000080503	SMARCA2	797.294	-1.257	0.343446	-3.65995	0.000252267	0.00706347	1263.56	1181.54	672.557	408.572	460.235
113	ENSG00000196396	PTPN1	794.135	-1.22566	0.335222	-3.65627	0.000255909	0.00710205	1297.4	1085.22	707.955	412.828	467.275
114	ENSG00000164105	SAP30	218.503	-1.74479	0.477852	-3.65131	0.000260903	0.00717713	448.646	315.72	147.37	92.7799	87.9991
115	ENSG00000112773	TENT5A	415.012	-1.26701	0.347557	-3.64548	0.000266892	0.00727802	679.588	527.627	418.271	211.096	238.477
116	ENSG00000216676	RPL8P1	102.067	-2.03868	0.560483	-3.63736	0.000275444	0.00744648	202.994	162.676	73.6851	34.8989	36.0796
117	ENSG00000124145	SDC4	105.469	1.75172	0.483064	3.62626	0.000287553	0.00770741	55.8969	59.9333	46.9562	148.959	215.598
118	ENSG00000165912	PACSIN3	182.456	-1.78321	0.494092	-3.60907	0.000307298	0.00809821	316.259	316.79	131.477	54.4763	93.279
119	ENSG00000227747	0	154.467	-2.24067	0.620492	-3.61111	0.000304887	0.00809821	360.388	261.138	55.625	47.6667	47.5195
120	ENSG00000133895	MEN1	151.272	-1.86135	0.517294	-3.59824	0.000320374	0.00837243	273.601	267.559	98.2468	54.4763	62.4793
121	ENSG00000166147	FBN1	2866.7	-1.29661	0.360666	-3.59504	0.000324338	0.00840597	4889.51	4402.96	1982.27	1536.4	1522.38
122	ENSG00000183160	TMEM119	121.194	-1.77166	0.493232	-3.59194	0.000328226	0.0084274	204.465	195.853	106.916	46.8155	51.9195
123	ENSG00000268623	0	126.789	-1.81579	0.505775	-3.59011	0.000330539	0.0084274	241.239	185.151	106.916	42.5596	58.0794
124	ENSG00000236913	RPS13P3	818.719	-1.62465	0.453017	-3.5863	0.000335408	0.00848257	1700.44	1252.18	413.937	359.203	367.836
125	ENSG00000069275	NUCKS1	7721.72	-1.14873	0.320691	-3.58204	0.000340922	0.00848517	12822.5	10536.5	6325.36	4177.65	4746.67
126	ENSG00000240371	RPS4XP13	1127.5	-1.39672	0.389703	-3.58407	0.000338277	0.00848517	1884.31	1872.91	741.908	503.905	634.473
127	ENSG00000089157	RPLP0	601.1	1.04718	0.293686	3.56565	0.000362957	0.00873799	442.762	395.988	425.495	865.662	875.591
128	ENSG00000160014	CALM3	293.047	-1.68779	0.473169	-3.56699	0.000361105	0.00873799	672.234	332.844	209.497	108.101	142.558
129	ENSG00000213448	RPS23P2	1854.51	-1.49895	0.420562	-3.56417	0.000365012	0.00873799	3687.72	2769.77	1046.04	747.346	1021.67
130	ENSG00000213970	0	86.9688	-2.10495	0.590007	-3.56766	0.000360179	0.00873799	197.11	105.953	73.6851	25.5357	32.5597
131	ENSG00000256464	YWHABP2	520.107	-1.45325	0.406956	-3.57103	0.000355579	0.00873799	844.337	875.454	372.037	205.988	302.717
132	ENSG00000141376	BCAS3	131.064	-1.96883	0.557196	-3.53346	0.000410156	0.00967105	295.665	180.87	83.7987	53.6251	41.3596
133	ENSG00000170801	HTRA3	97.7227	-1.84415	0.521684	-3.53499	0.000407788	0.00967105	129.445	160.536	122.086	26.3869	50.1595
134	ENSG00000011422	PLAUR	86.7135	2.70334	0.766449	3.5271	0.000420142	0.00973624	4.41291	12.8428	62.1266	169.387	184.798
135	ENSG00000089685	BIRC5	93.4686	1.74328	0.494437	3.52578	0.000422235	0.00973624	55.8969	42.8095	46.2338	146.405	175.998
136	ENSG00000092964	DPYSL2	314.743	-1.51159	0.428567	-3.52709	0.00042016	0.00973624	516.311	523.346	236.226	118.316	179.518
137	ENSG00000230359	TPI1P2	99.9284	-1.99777	0.567333	-3.52135	0.000429363	0.00982834	216.233	130.569	81.6315	28.0893	43.1195
138	ENSG00000020129	NCDN	353.832	-1.22687	0.34886	-3.51679	0.000436802	0.00992616	420.698	393.847	562.029	178.75	213.838
139	ENSG00000157570	TSPAN18	192.817	-1.77911	0.507119	-3.50827	0.000451031	0.0100629	428.052	252.576	127.143	87.6727	68.6393
140	ENSG00000160753	RUSC1	173.723	-1.52532	0.434793	-3.50814	0.000451247	0.0100629	288.31	252.576	164.708	71.5001	91.519
141	ENSG00000198225	FKBP1C	210.317	-1.56889	0.447305	-3.50744	0.000452444	0.0100629	385.394	306.088	167.597	84.268	108.239
142	ENSG00000039560	RAI14	1176.08	0.987659	0.281829	3.50446	0.00045753	0.0101043	726.659	840.136	964.408	1692.17	1657.02
143	ENSG00000166441	RPL27A	6288.78	-0.986416	0.281788	-3.50056	0.000464276	0.0101816	9292.12	8047.11	6188.83	3579.26	4336.59
144	ENSG00000169851	PCDH7	123.783	-1.83443	0.52451	-3.49741	0.000469805	0.0102313	253.007	171.238	97.5244	41.7084	55.4394
145	ENSG00000143013	LMO4	572.78	-1.31786	0.377435	-3.49162	0.000480092	0.0103832	1003.2	800.537	456.559	262.167	341.436
146	ENSG00000065809	FAM107B	187.197	1.38103	0.397032	3.47839	0.000504442	0.0108351	92.6711	115.586	132.922	314.09	280.717
147	ENSG00000134531	EMP1	306.109	1.38243	0.397675	3.47628	0.000508412	0.0108461	183.871	117.726	256.453	491.138	481.355
148	ENSG00000103187	COTL1	134.552	1.65692	0.477143	3.4726	0.000515449	0.0109219	91.2002	42.8095	83.0763	212.798	242.877
149	ENSG00000147548	NSD3	456.334	-1.39025	0.401249	-3.46482	0.000530583	0.0110287	872.286	603.614	343.864	236.631	225.278
150	ENSG00000161016	RPL8	9246.41	-1.25963	0.363488	-3.4654	0.000529438	0.0110287	16605.8	13318	6240.12	4625.37	5442.74
151	ENSG00000184900	SUMO3	626.324	-1.29101	0.372631	-3.46459	0.000531038	0.0110287	1064.98	919.334	477.508	334.518	335.276
152	ENSG00000144824	PHLDB2	211.915	-1.62459	0.469366	-3.46126	0.00053766	0.0110928	410.401	314.65	146.648	91.0775	96.799
153	ENSG00000170469	SPATA24	94.6184	-2.05837	0.595404	-3.45709	0.000546037	0.011192	211.82	132.709	63.5715	29.7917	35.1996
154	ENSG00000130312	MRPL34	234.369	-1.58638	0.45956	-3.45195	0.000556546	0.0113333	501.601	268.63	189.27	96.1846	116.159
155	ENSG00000259020	0	263.229	-1.60295	0.464798	-3.44869	0.000563303	0.0113969	583.975	263.278	232.614	143	93.279
156	ENSG00000100644	HIF1A	1230.27	-1.21729	0.353666	-3.44193	0.00057759	0.0115392	2093.19	1745.56	942.736	736.281	633.593
157	ENSG00000167792	NDUFV1	215.862	-1.43338	0.416455	-3.44188	0.000577697	0.0115392	395.691	251.506	218.888	96.1846	117.039
158	ENSG00000148660	CAMK2G	132.352	-1.97655	0.575019	-3.43736	0.000587424	0.0116592	205.936	283.613	76.5747	60.4346	35.1996
159	ENSG00000087245	MMP2	903.727	-1.08927	0.317652	-3.42913	0.000605516	0.0118681	1494.51	1040.27	906.616	542.209	535.034
160	ENSG00000214144	0	101.492	-2.32601	0.678297	-3.42919	0.000605378	0.0118681	278.013	110.234	59.9594	43.4108	15.8398
161	ENSG00000171490	RSL1D1	280.007	1.18035	0.345102	3.42029	0.000625536	0.0121844	177.987	203.345	176.266	407.721	434.715
162	ENSG00000115461	IGFBP5	134.346	1.65126	0.485478	3.40131	0.000670627	0.0129024	83.8453	93.1106	41.177	222.161	231.438
163	ENSG00000273870	0	299.122	-1.6541	0.486265	-3.40163	0.000669842	0.0129024	622.221	419.533	192.882	89.3751	171.598
164	ENSG00000143614	GATAD2B	249.607	-1.39144	0.409725	-3.39603	0.000683717	0.013074	329.497	446.289	219.61	127.679	124.959
165	ENSG00000075426	FOSL2	81.9821	-1.96911	0.582042	-3.3831	0.000716724	0.0133791	116.207	162.676	71.5179	35.75	23.7597
166	ENSG00000115649	CNPPD1	168.09	-1.56495	0.462269	-3.38538	0.000710803	0.0133791	273.601	278.262	134.367	71.5001	82.7191
167	ENSG00000140988	RPS2	220.566	1.26698	0.374108	3.38667	0.000707468	0.0133791	148.568	156.255	119.196	354.096	324.717
168	ENSG00000225272	0	339.528	-1.64021	0.484826	-3.3831	0.000716736	0.0133791	597.214	619.667	182.046	118.316	180.398
169	ENSG00000171467	ZNF318	360.771	-1.30211	0.385359	-3.37896	0.000727596	0.0135014	628.104	489.098	303.409	194.923	188.318
170	ENSG00000174579	MSL2	144.909	-1.82199	0.539712	-3.37585	0.000735882	0.0135749	241.239	276.121	92.4676	42.5596	72.1592
171	ENSG00000119812	FAM98A	770.002	-1.31578	0.39032	-3.37102	0.000748916	0.0137345	1294.45	1228.63	514.351	406.018	406.556
172	ENSG00000011451	WIZ	114.054	-1.83527	0.545536	-3.36417	0.000767753	0.0137363	195.639	196.924	88.1331	31.4941	58.0794
173	ENSG00000112079	STK38	393.83	-1.31175	0.389599	-3.36692	0.000760122	0.0137363	653.111	581.139	318.58	179.601	236.718
174	ENSG00000155254	MARVELD1	188.914	-1.3266	0.394337	-3.36413	0.000767845	0.0137363	247.123	286.824	212.386	97.0358	101.199
175	ENSG00000220771	BOLA2P3	156.441	-1.954	0.581024	-3.36303	0.000770916	0.0137363	394.22	192.643	80.9091	51.0715	63.3593
176	ENSG00000230611	HMGB1P27	159.361	-1.7654	0.524634	-3.36501	0.000765415	0.0137363	310.375	255.787	100.414	78.3096	51.9195
177	ENSG00000166341	DCHS1	86.1595	-1.90454	0.566845	-3.3599	0.000779711	0.0138145	170.633	123.077	72.2403	34.0477	30.7997
178	ENSG00000226439	0	868.885	-1.4358	0.427843	-3.35591	0.000791046	0.0139366	1729.86	1256.46	499.903	383.887	474.315
179	ENSG00000052802	MSMO1	296.114	-1.33835	0.399008	-3.35419	0.000795983	0.0139453	492.775	378.864	300.52	195.774	112.639
180	ENSG00000239039	SNORD13	116.386	-1.5588	0.465896	-3.3458	0.000820457	0.0142942	170.633	177.659	126.421	56.1786	51.0395
181	ENSG00000159403	C1R	132.916	1.56915	0.469937	3.33907	0.000840598	0.0145642	45.6001	92.0404	84.5211	214.5	227.918
182	ENSG00000005483	KMT2E	896.996	-1.09843	0.329412	-3.33452	0.00085448	0.0147234	1384.18	1252.18	784.53	566.894	497.195
183	ENSG00000146674	IGFBP3	95.7077	2.13934	0.642476	3.32983	0.000868986	0.0148915	38.2452	71.7059	12.2808	184.709	171.598
184	ENSG00000133612	AGAP3	232.078	-1.32816	0.401216	-3.31035	0.000931802	0.0158811	347.149	360.67	209.497	124.274	118.799
185	ENSG00000214182	PTMAP5	132.908	-1.74113	0.526352	-3.30792	0.00093991	0.0159327	235.355	227.96	91.0228	45.9643	64.2393
186	ENSG00000065548	ZC3H15	1220.26	-0.981239	0.297505	-3.29823	0.000972956	0.0162297	1826.95	1544.35	1190.52	769.477	769.992
187	ENSG00000183684	ALYREF	649.666	-1.02402	0.310389	-3.29914	0.000969821	0.0162297	794.324	973.916	678.336	413.679	388.076
188	ENSG00000242327	0	100.41	-2.06986	0.627444	-3.29888	0.000970705	0.0162297	232.413	149.833	51.2906	29.7917	38.7196
189	ENSG00000105258	POLR2I	577.485	-1.33341	0.404669	-3.29507	0.000983958	0.0163264	1226.79	539.399	517.963	297.917	305.357
190	ENSG00000135940	COX5B	770.894	-1.2096	0.367912	-3.28775	0.00100992	0.016669	1285.63	1098.06	608.986	355.798	505.995
191	ENSG00000101412	E2F1	168.708	-1.89437	0.576631	-3.28523	0.00101898	0.0167305	289.781	354.248	71.5179	66.3929	61.5994
192	ENSG00000167526	RPL13	596.131	1.18077	0.359987	3.28003	0.00103797	0.0167922	292.723	360.67	531.689	716.703	1078.87
193	ENSG00000198840	MT-ND3	8668.19	1.06704	0.325598	3.27717	0.00104852	0.0167922	5055.73	7428.52	5598.62	16549.7	8708.39
194	ENSG00000206503	HLA-A	91.6887	1.65547	0.504589	3.28082	0.00103505	0.0167922	51.484	57.7928	39.0098	170.238	139.919
195	ENSG00000218426	0	219.722	-1.22799	0.374478	-3.27921	0.00104097	0.0167922	303.02	308.228	244.172	120.869	122.319
196	ENSG00000233762	RPS15P4	2324.71	-1.12698	0.343963	-3.27644	0.00105123	0.0167922	3956.91	3176.46	1772.78	1248.7	1468.7
197	ENSG00000243304	0	521.419	-1.58658	0.484382	-3.27547	0.00105487	0.0167922	1095.87	798.397	239.838	221.31	251.677
198	ENSG00000145555	MYO10	823.6	1.06011	0.325359	3.25827	0.00112093	0.0173866	395.691	664.617	660.999	1182.31	1214.39
199	ENSG00000165795	NDRG2	98.9071	-1.79837	0.551073	-3.26339	0.00110088	0.0173866	110.323	212.977	91.7452	43.4108	36.0796
200	ENSG00000175550	DRAP1	120.743	1.58207	0.485879	3.25611	0.00112951	0.0173866	52.9549	51.3714	96.0796	200.03	203.278
201	ENSG00000183978	COA3	258.053	-1.49874	0.460338	-3.25573	0.00113102	0.0173866	386.865	482.677	174.821	144.703	101.199
202	ENSG00000198171	DDRGK1	125.028	-1.50408	0.461531	-3.25889	0.00111851	0.0173866	167.691	168.027	170.487	74.0537	44.8795
203	ENSG00000198727	MT-CYB	5025.85	1.09755	0.336943	3.25738	0.00112446	0.0173866	2256.47	4257.4	3840.29	9128.18	5646.9
204	ENSG00000204356	NELFE	541.576	-1.13383	0.347771	-3.26029	0.00111299	0.0173866	842.866	747.025	487.622	277.488	352.876
205	ENSG00000239809	0	245.909	-1.53333	0.472169	-3.24742	0.00116457	0.017815	516.311	318.931	164.708	106.399	123.199
206	ENSG00000077312	SNRPA	561.366	-1.428	0.440084	-3.24483	0.00117523	0.0178908	1079.69	829.434	340.974	217.054	339.676
207	ENSG00000091986	CCDC80	5093.31	-1.17446	0.362864	-3.23665	0.00120943	0.0179821	8640.48	7645.77	3374.34	2738.28	3067.65
208	ENSG00000105281	SLC1A5	117.954	1.45445	0.449033	3.23906	0.00119923	0.0179821	69.1356	73.8464	65.7387	207.691	173.358
209	ENSG00000108821	COL1A1	25544.6	-1.13984	0.352162	-3.23669	0.00120926	0.0179821	43815.8	36731.6	17510.3	14103.4	15561.8
210	ENSG00000137285	TUBB2B	568.094	-1.33631	0.413055	-3.23519	0.00121563	0.0179821	1120.88	742.745	384.318	277.488	315.037
211	ENSG00000141258	SGSM2	101.519	-1.76031	0.544041	-3.23562	0.00121377	0.0179821	177.987	169.097	77.2971	37.4524	45.7595
212	ENSG00000163430	FSTL1	428.788	1.23684	0.381625	3.24098	0.00119119	0.0179821	161.807	328.563	341.697	629.882	681.993
213	ENSG00000092841	MYL6	5144.17	-0.969477	0.299869	-3.233	0.00122497	0.0180288	8077.1	6510.25	4601.71	3079.61	3452.2
214	ENSG00000204228	HSD17B8	98.8063	-2.09839	0.649303	-3.23176	0.00123028	0.0180288	194.168	164.817	68.6283	13.6191	52.7994
215	ENSG00000171159	BBLN	160.117	-1.61826	0.501033	-3.22984	0.00123858	0.018066	329.497	204.415	124.253	56.1786	86.2391
216	ENSG00000164574	GALNT10	130.028	-1.51706	0.470195	-3.22646	0.00125334	0.0181127	197.11	205.486	124.976	70.6489	51.9195
217	ENSG00000175203	DCTN2	784.888	-1.19986	0.371879	-3.22649	0.00125319	0.0181127	1419.49	1026.36	596.705	411.977	469.915
218	ENSG00000068308	OTUD5	323.127	-1.14184	0.356194	-3.20567	0.00134746	0.0193076	469.24	454.851	317.135	195.774	178.638
219	ENSG00000127022	CANX	3708.31	-0.896752	0.279755	-3.20549	0.00134833	0.0193076	5230.77	4824.63	3598.29	2276.94	2610.93
220	ENSG00000143376	SNX27	112.077	-1.56683	0.489261	-3.20243	0.00136272	0.0194167	152.981	192.643	111.972	57.0298	45.7595
221	ENSG00000173511	VEGFB	173.727	-1.50117	0.468934	-3.20125	0.00136833	0.0194167	316.259	255.787	131.477	87.6727	77.4392
222	ENSG00000240163	RPL36AP44	95.5221	-2.2698	0.710833	-3.19316	0.00140724	0.0198789	188.284	203.345	28.1737	34.0477	23.7597
223	ENSG00000122641	INHBA	1100.23	1.42048	0.445106	3.19132	0.00141623	0.0199161	263.304	599.333	1110.33	1785.8	1742.38
224	ENSG00000188375	H3-5	205.273	-1.49588	0.469337	-3.18722	0.00143649	0.0201108	410.401	272.91	147.37	94.4823	101.199
225	ENSG00000109113	RAB34	734.734	-1.18657	0.373399	-3.17776	0.0014842	0.0206208	1348.88	911.842	581.534	369.417	461.995
226	ENSG00000117411	B4GALT2	986.08	-1.27448	0.401108	-3.17739	0.00148606	0.0206208	1934.33	1296.06	635.715	534.548	529.754
227	ENSG00000132254	ARFIP2	183.544	-1.39152	0.438797	-3.17121	0.00151804	0.0207886	330.968	234.382	166.875	83.4168	102.079
228	ENSG00000168542	COL3A1	496.451	-1.3571	0.427703	-3.17299	0.00150876	0.0207886	913.473	753.447	303.409	240.887	271.037
229	ENSG00000236191	RPS15AP25	174.151	-1.64424	0.518319	-3.17226	0.00151258	0.0207886	338.323	277.191	102.581	65.5418	87.1191
230	ENSG00000264364	DYNLL2	1652.6	-1.12598	0.355212	-3.16988	0.001525	0.020793	2775.72	2333.12	1221.58	854.596	1077.99
231	ENSG00000213885	RPL13AP7	110.767	-1.6667	0.526193	-3.16748	0.00153767	0.0208751	201.523	166.957	89.578	56.1786	39.5996
232	ENSG00000151247	EIF4E	179.882	-1.4658	0.463553	-3.1621	0.00156638	0.0210823	323.614	256.857	144.481	71.5001	102.959
233	ENSG00000244753	RPL15P21	190.865	-1.69683	0.536512	-3.1627	0.00156315	0.0210823	375.097	317.86	98.9692	63.8394	98.559
234	ENSG00000198938	MT-CO3	10901	0.888171	0.281469	3.15548	0.00160233	0.021474	7070.96	9391.33	7936.32	17766.9	12339.2
235	ENSG00000132388	UBE2G1	155.737	-1.7099	0.543396	-3.1467	0.00165125	0.0220354	338.323	196.924	111.972	41.7084	89.7591
236	ENSG00000170017	ALCAM	427.402	-1.02888	0.328675	-3.13039	0.00174574	0.0231976	622.221	544.751	444.278	274.084	251.677
237	ENSG00000109861	CTSC	218.129	1.1662	0.373059	3.12606	0.00177167	0.0234428	138.271	168.027	130.755	319.197	334.396
238	ENSG00000094916	CBX5	567.532	-1.04745	0.335527	-3.1218	0.00179748	0.0236844	838.453	789.835	517.963	371.971	319.437
239	ENSG00000163754	GYG1	264.658	-1.44131	0.462908	-3.11359	0.00184825	0.0242515	473.653	419.533	169.765	108.101	152.238
240	ENSG00000182287	AP1S2	468.691	-1.30833	0.420932	-3.10816	0.00188253	0.0245984	861.989	683.881	301.242	233.226	263.117
241	ENSG00000155366	RHOC	206.154	1.29712	0.418088	3.1025	0.00191892	0.0249699	83.8453	146.622	158.929	290.256	351.116
242	ENSG00000034152	MAP2K3	158.207	1.45883	0.4704	3.10125	0.00192705	0.0249721	50.013	124.147	104.026	265.572	247.277
243	ENSG00000243777	0	579.188	-1.48962	0.480763	-3.09845	0.00194538	0.0251059	1025.27	1062.75	252.841	265.572	289.517
244	ENSG00000278943	0	100.65	-2.01698	0.652087	-3.09312	0.00198064	0.0254561	183.871	208.696	39.7322	35.75	35.1996
245	ENSG00000080845	DLGAP4	866.845	-1.07554	0.348213	-3.08875	0.00201	0.025728	1491.56	1074.52	727.46	478.37	562.314
246	ENSG00000203914	HSP90B3P	107.557	-1.81956	0.589609	-3.08605	0.00202833	0.0258571	233.884	153.044	65.7387	33.1965	51.9195
247	ENSG00000100354	TNRC6B	429.617	-0.976299	0.316778	-3.08196	0.0020564	0.0259497	541.317	559.734	503.515	295.363	248.157
248	ENSG00000163382	NAXE	907.027	-1.16924	0.379239	-3.08312	0.00204842	0.0259497	1606.3	1193.31	699.286	401.762	634.473
249	ENSG00000205940	HSP90AB2P	128.735	-1.46564	0.475644	-3.08138	0.00206042	0.0259497	163.278	215.118	140.146	46.8155	78.3192
250	ENSG00000118971	CCND2	240.909	-1.50353	0.488614	-3.07713	0.00209002	0.0260091	394.22	444.148	137.257	100.441	128.479
251	ENSG00000196924	FLNA	7392.4	-0.911639	0.296238	-3.07739	0.00208825	0.0260091	10661.6	10002.4	6627.32	4253.4	5417.22
252	ENSG00000237170	RPS7P15	435.885	-1.59015	0.516405	-3.07926	0.00207512	0.0260091	932.595	677.46	174.821	172.792	221.758
253	ENSG00000148296	SURF6	84.9011	1.79174	0.582621	3.0753	0.00210289	0.0260658	20.5936	40.669	65.7387	154.066	143.438
254	ENSG00000108774	RAB5C	777.636	-1.23145	0.400639	-3.07372	0.00211411	0.0261017	1429.78	1100.2	499.18	411.977	447.035
255	ENSG00000134371	CDC73	519.982	-1.17627	0.38319	-3.06969	0.00214282	0.0262809	819.331	793.046	395.877	251.102	340.556
256	ENSG00000142156	COL6A1	1729	0.84079	0.273932	3.06933	0.00214538	0.0262809	1159.12	1314.25	1465.76	2168.84	2537.01
257	ENSG00000206527	HACD2	211.732	-1.47858	0.482797	-3.06253	0.00219474	0.0267809	411.872	307.158	135.812	114.06	89.7591
258	ENSG00000086015	MAST2	256.917	-1.5222	0.499162	-3.04952	0.00229208	0.0274415	469.24	443.078	130.755	118.316	123.199
259	ENSG00000113328	CCNG1	237.636	-1.42027	0.465214	-3.05293	0.0022662	0.0274415	425.11	375.653	150.982	112.357	124.079
260	ENSG00000170004	CHD3	652.289	-1.13029	0.370653	-3.04945	0.00229263	0.0274415	1123.82	882.946	494.124	383.036	377.516
261	ENSG00000176340	COX8A	113.8	1.39592	0.457252	3.05285	0.00226681	0.0274415	73.5485	74.9166	58.5146	171.941	190.078
262	ENSG00000231500	RPS18	352.937	1.03432	0.339061	3.05054	0.00228427	0.0274415	267.717	260.068	218.888	576.257	441.755
263	ENSG00000124766	SOX4	456.078	-1.01926	0.335731	-3.03594	0.00239789	0.0285924	466.298	546.891	702.176	257.911	307.117
264	ENSG00000104853	CLPTM1	258.455	-1.34039	0.442369	-3.03003	0.00244533	0.0288656	497.188	334.984	191.437	148.107	120.559
265	ENSG00000115935	WIPF1	372.48	-1.29748	0.428263	-3.02964	0.00244842	0.0288656	736.956	468.764	260.065	189.816	206.798
266	ENSG00000117519	CNN3	231.285	-1.26924	0.418914	-3.02984	0.00244683	0.0288656	407.459	303.947	195.049	128.53	121.439
267	ENSG00000090316	MAEA	115.254	-1.52508	0.504592	-3.0224	0.00250783	0.0293454	122.091	223.68	122.086	46.8155	61.5994
268	ENSG00000184009	ACTG1	9191.94	-0.988233	0.326957	-3.02252	0.00250681	0.0293454	15058.3	12310.9	7031.15	5782.14	5777.14
269	ENSG00000185650	ZFP36L1	348.399	1.07854	0.356994	3.02116	0.00251811	0.0293561	177.987	251.506	292.573	545.614	474.315
270	ENSG00000136942	RPL35	7701.17	-1.04167	0.3452	-3.0176	0.00254789	0.0294527	12921	10690.6	5475.81	4398.96	5019.47
271	ENSG00000165527	ARF6	377.566	-1.22943	0.407677	-3.01569	0.00256396	0.0294527	642.814	559.734	268.011	203.435	213.838
272	ENSG00000171863	RPS7	119.514	1.60105	0.530755	3.01655	0.00255668	0.0294527	76.4905	32.1071	88.8556	164.28	235.838
273	ENSG00000198431	TXNRD1	852.567	1.11009	0.3681	3.01572	0.00256366	0.0294527	385.394	483.747	876.275	1307.43	1209.99
274	ENSG00000170515	PA2G4	321.992	1.10527	0.366689	3.01419	0.00257664	0.0294903	226.529	162.676	271.623	427.298	521.835
275	ENSG00000213787	RPL7AP38	1747.92	-1.33322	0.442509	-3.01285	0.00258805	0.0295132	3221.43	2870.38	819.927	801.822	1026.07
276	ENSG00000185088	RPS27L	1809.88	-0.823432	0.273474	-3.011	0.00260387	0.029586	1951.98	2082.68	2537.8	1203.58	1273.35
277	ENSG00000140259	MFAP1	464.986	-0.972454	0.323261	-3.00826	0.00262745	0.0297462	636.93	629.299	469.562	299.619	289.517
278	ENSG00000108854	SMURF2	462.71	1.00214	0.333268	3.00702	0.00263826	0.0297611	255.949	404.55	329.416	672.441	651.193
279	ENSG00000129219	PLD2	177.812	-1.50982	0.502559	-3.00427	0.00266221	0.0299236	364.801	231.171	124.976	102.994	65.1193
280	ENSG00000241553	ARPC4	1180.95	-0.839379	0.279544	-3.00267	0.00267618	0.0299733	1600.42	1429.84	1272.15	757.56	844.791
281	ENSG00000187840	EIF4EBP1	332.732	-1.12179	0.374067	-2.99889	0.00270963	0.0302399	576.62	370.302	327.248	192.369	197.118
282	ENSG00000169621	APLF	112.809	-1.5454	0.515815	-2.99602	0.00273524	0.0304175	213.291	150.903	95.3572	58.7322	45.7595
283	ENSG00000241352	0	521.735	-1.42559	0.47606	-2.99455	0.00274847	0.0304565	1025.27	824.083	241.283	268.125	249.917
284	ENSG00000180189	HMGB1P14	142.508	-1.71417	0.57314	-2.99083	0.00278219	0.0307216	303.02	212.977	76.5747	43.4108	76.5592
285	ENSG00000149532	CPSF7	154.324	-1.39624	0.467487	-2.98669	0.0028202	0.0309615	270.659	218.328	127.143	85.9703	69.5193
286	ENSG00000183199	HSP90AB3P	119.265	-1.72606	0.577992	-2.98631	0.00282365	0.0309615	238.297	194.783	63.5715	45.1132	54.5594
287	ENSG00000104695	PPP2CB	549.109	-1.0177	0.342047	-2.97533	0.00292669	0.0319118	792.853	785.554	487.622	307.28	372.236
288	ENSG00000136448	NMT1	1062.75	-0.88312	0.296937	-2.9741	0.0029385	0.0319118	1375.36	1423.42	1104.55	603.495	806.952
289	ENSG00000197061	H4C3	694.522	-0.887133	0.298311	-2.97385	0.00294085	0.0319118	809.034	977.126	766.469	482.626	437.355
290	ENSG00000236238	0	84.1907	-2.09334	0.704341	-2.97205	0.00295814	0.0319887	161.807	162.676	39.7322	13.6191	43.1195
291	ENSG00000135090	TAOK3	647.733	-0.910892	0.307128	-2.96583	0.00301864	0.0325308	953.189	749.166	689.172	424.745	422.396
292	ENSG00000185825	BCAP31	155.904	1.37376	0.463736	2.96239	0.00305265	0.0327846	64.7227	82.4083	137.257	217.054	278.077
293	ENSG00000117632	STMN1	1384.93	-1.08928	0.368059	-2.95952	0.00308123	0.0329786	2331.49	1970.31	971.632	717.554	933.67
294	ENSG00000103942	HOMER2	80.9098	-1.98218	0.671082	-2.9537	0.00313985	0.0334918	120.62	183.011	42.6218	19.5774	38.7196
295	ENSG00000105677	TMEM147	744.371	-1.08403	0.367569	-2.94918	0.00318619	0.0338708	1404.78	771.641	655.942	421.34	468.155
296	ENSG00000181191	PJA1	95.0847	-1.60859	0.545914	-2.9466	0.00321287	0.0340391	186.813	122.007	81.6315	37.4524	47.5195
297	ENSG00000100075	SLC25A1	266.533	-1.07652	0.365653	-2.9441	0.00323898	0.0341385	314.788	384.215	313.523	135.339	184.798
298	ENSG00000224411	HSP90AA2P	186.576	-1.37692	0.467766	-2.94362	0.00324403	0.0341385	348.62	250.435	143.758	78.3096	111.759
299	ENSG00000214753	HNRNPUL2	339.718	-1.16079	0.394488	-2.94252	0.0032555	0.0341447	598.685	434.516	275.958	194.072	195.358
300	ENSG00000228887	EEF1DP1	106.824	-1.70137	0.579842	-2.9342	0.00334408	0.0348435	219.175	141.271	83.0763	27.2381	63.3593
301	ENSG00000231369	0	163.768	-1.72804	0.588937	-2.93417	0.00334436	0.0348435	304.491	314.65	62.849	64.6906	72.1592
302	ENSG00000161970	RPL26	644.308	1.00273	0.342223	2.93003	0.00338924	0.0351942	313.317	570.436	494.124	829.912	1013.75
303	ENSG00000226080	RPL6P4	156.257	-1.71451	0.586441	-2.92359	0.00346022	0.0358127	311.846	275.051	62.849	65.5418	65.9993
304	ENSG00000049618	ARID1B	340.207	-1.03235	0.354093	-2.91548	0.00355141	0.0366356	408.93	517.995	356.145	234.929	183.038
305	ENSG00000164111	ANXA5	301.21	1.17532	0.403583	2.91221	0.00358881	0.0369	141.213	164.817	293.296	484.328	422.396
306	ENSG00000107833	NPM3	220.569	-1.40451	0.484301	-2.90008	0.00373069	0.0376188	394.22	349.968	137.257	88.5239	132.879
307	ENSG00000148737	TCF7L2	205.367	-1.23341	0.424878	-2.90297	0.00369643	0.0376188	367.743	206.556	226.112	96.1846	130.239
308	ENSG00000155229	MMS19	362.005	-1.0895	0.375166	-2.90403	0.00368388	0.0376188	613.395	448.429	317.135	211.947	219.118
309	ENSG00000178982	EIF3K	1287.53	-1.06637	0.367124	-2.90468	0.00367634	0.0376188	2187.33	1771.24	925.398	662.227	891.431
310	ENSG00000179222	MAGED1	581.605	-1.20908	0.416804	-2.90083	0.00372179	0.0376188	1167.95	673.179	416.826	267.274	382.796
311	ENSG00000204498	NFKBIL1	98.7908	-1.61048	0.555058	-2.90146	0.0037143	0.0376188	151.51	184.081	70.0731	43.4108	44.8795
312	ENSG00000241839	PLEKHO2	153.02	-1.57853	0.545214	-2.89526	0.0037885	0.0380793	319.201	223.68	83.0763	74.9049	64.2393
313	ENSG00000132475	H3-3B	1550.47	-0.917955	0.317476	-2.89142	0.00383509	0.0384245	2357.97	2073.05	1300.33	998.448	1022.55
314	ENSG00000087460	GNAS	202.568	1.3036	0.451637	2.88639	0.00389687	0.0388096	66.1937	168.027	147.37	329.411	301.837
315	ENSG00000147164	SNX12	285.444	-1.10169	0.3817	-2.88628	0.00389828	0.0388096	417.756	419.533	252.119	159.173	178.638
316	ENSG00000073008	PVR	240.47	1.1552	0.401466	2.87744	0.00400914	0.0397413	130.916	128.428	223.222	339.625	380.156
317	ENSG00000122406	RPL5	551.126	1.03346	0.359579	2.87407	0.0040522	0.0397413	289.781	323.212	550.471	746.495	845.671
318	ENSG00000197157	SND1	597.01	-1.09138	0.379766	-2.87383	0.00405523	0.0397413	1066.45	760.939	447.167	354.096	356.396
319	ENSG00000224800	RPS27AP6	2322.69	-1.2917	0.449085	-2.87629	0.00402377	0.0397413	4337.89	3730.85	1059.77	993.341	1491.58
320	ENSG00000235297	FAUP1	157.591	-1.54269	0.53679	-2.87391	0.00405419	0.0397413	330.968	222.609	88.1331	73.2025	73.0392
321	ENSG00000128951	DUT	89.0803	1.42864	0.498803	2.86413	0.00418152	0.0407244	44.1291	57.7928	57.0698	143.851	142.558
322	ENSG00000198899	MT-ATP6	7946.14	0.8383	0.292652	2.8645	0.00417672	0.0407244	4554.12	6738.21	6831.76	12374.6	9231.98
323	ENSG00000119900	OGFRL1	145.367	1.50046	0.524441	2.86106	0.00422233	0.040868	63.2517	47.0904	140.146	200.03	276.317
324	ENSG00000166452	AKIP1	207.309	-1.33153	0.465272	-2.86183	0.00421207	0.040868	401.575	271.84	146.648	103.845	112.639
325	ENSG00000113732	ATP6V0E1	313.736	0.996685	0.348649	2.85871	0.0042537	0.041045	197.11	242.944	232.614	384.739	511.275
326	ENSG00000110955	ATP5F1B	104.607	1.4436	0.506347	2.851	0.00435815	0.0419238	86.7873	42.8095	57.0698	149.81	186.558
327	ENSG00000166313	APBB1	80.515	-1.75317	0.616486	-2.84381	0.00445779	0.0427511	100.026	175.519	60.6818	41.7084	24.6397
328	ENSG00000081189	MEF2C	122.877	-1.75118	0.616261	-2.84162	0.00448848	0.0429142	194.168	218.328	100.414	17.875	83.5991
329	ENSG00000074800	ENO1	1302.77	0.802921	0.283482	2.83236	0.00462062	0.0440434	981.137	874.384	1155.12	1613.01	1890.22
330	ENSG00000219149	PPIAP87	199.704	-1.36074	0.480848	-2.82987	0.00465672	0.0442529	360.388	307.158	125.698	97.0358	108.239
331	ENSG00000147403	RPL10	278.738	1.03961	0.368051	2.82465	0.00473325	0.0447093	170.633	236.522	180.601	342.179	463.755
332	ENSG00000161547	SRSF2	432.098	-1.27899	0.452747	-2.82495	0.00472881	0.0447093	747.253	717.059	231.169	223.012	241.997
333	ENSG00000132635	PCED1A	219.731	-1.03737	0.368235	-2.81715	0.00484523	0.045366	300.078	270.77	258.62	132.786	136.399
334	ENSG00000150093	ITGB1	466.508	0.884101	0.31368	2.81848	0.00482512	0.045366	344.207	344.616	356.867	719.257	567.594
335	ENSG00000260257	0	87.5232	-1.80668	0.641329	-2.81708	0.00484618	0.045366	188.284	92.0404	87.4107	15.3214	54.5594
336	ENSG00000171867	PRNP	170.517	1.11886	0.397352	2.8158	0.00486553	0.0454116	110.323	125.218	112.695	230.673	273.677
337	ENSG00000007168	PAFAH1B1	448.801	-1.16415	0.413881	-2.81277	0.0049116	0.0457056	809.034	622.878	298.352	239.185	274.557
338	ENSG00000108298	RPL19	560.938	0.872082	0.310373	2.80978	0.0049575	0.0459962	442.762	347.827	472.451	783.096	758.552
339	ENSG00000198755	RPL10A	204.799	1.12465	0.401347	2.80218	0.0050758	0.0469549	154.452	127.358	135.812	232.375	373.996
340	ENSG00000162545	CAMK2N1	285.258	1.05213	0.37563	2.80096	0.00509501	0.046994	138.271	225.82	233.336	418.786	410.076
341	ENSG00000196498	NCOR2	942.371	-1.12549	0.40235	-2.79728	0.00515341	0.0473933	1610.71	1427.7	571.421	486.03	615.994
342	ENSG00000149257	SERPINH1	166.33	1.28386	0.459713	2.79273	0.00522646	0.0479245	73.5485	159.465	83.7987	258.762	256.077
343	ENSG00000078369	GNB1	1507.12	-0.956185	0.342653	-2.79053	0.00526216	0.0479714	2400.62	2066.63	1142.12	886.942	1039.27
344	ENSG00000184867	ARMCX2	94.4471	-1.78525	0.639661	-2.79093	0.00525561	0.0479714	210.349	142.342	43.3442	36.6012	39.5996
345	ENSG00000001617	SEMA3F	82.9418	-1.80522	0.648146	-2.78521	0.00534936	0.0486249	192.697	101.673	54.1802	21.2798	44.8795
346	ENSG00000159140	SON	1950.96	-0.936015	0.336413	-2.78234	0.00539692	0.0489154	3293.5	2410.17	1531.49	1241.89	1277.75
347	ENSG00000260032	NORAD	161.358	1.25856	0.452629	2.78055	0.00542665	0.0490432	126.503	63.144	121.364	223.863	271.917
348	ENSG00000099194	SCD	98.6355	-1.72675	0.622122	-2.77558	0.00551042	0.0490928	211.82	116.656	82.3539	62.9882	19.3598
349	ENSG00000134294	SLC38A2	1126.3	-0.939589	0.3381	-2.77903	0.00545216	0.0490928	1794.58	1457.66	927.565	633.287	818.391
350	ENSG00000142937	RPS8	1220.89	0.784343	0.282357	2.77784	0.00547212	0.0490928	856.105	871.173	1113.22	1636.84	1627.1
351	ENSG00000176343	RPL37AP8	157.066	-1.40308	0.505474	-2.77577	0.00550715	0.0490928	298.607	227.96	101.136	74.9049	82.7191
352	ENSG00000240498	CDKN2B-AS1	195.061	-1.26146	0.454294	-2.77675	0.00549057	0.0490928	336.852	277.191	149.537	88.5239	123.199
353	ENSG00000206418	RAB12	375.128	-1.16972	0.421815	-2.77307	0.00555297	0.0493317	670.763	527.627	249.229	223.863	204.158
354	ENSG00000162063	CCNF	280.911	-1.33193	0.480744	-2.77056	0.00559594	0.0495731	483.949	466.623	160.373	113.208	180.398
355	ENSG00000131473	ACLY	256.282	-1.09684	0.39642	-2.76686	0.00565993	0.0499987	339.794	412.041	225.39	138.744	165.438
356	ENSG00000172809	RPL38	701.584	0.843569	0.305361	2.76253	0.00573551	0.050524	489.833	465.553	640.771	1001.85	909.91
357	ENSG00000111145	ELK3	671.91	-1.07709	0.390413	-2.75885	0.00580047	0.0509532	1222.38	864.752	466.672	425.596	380.156
358	ENSG00000128585	MKLN1	197.091	-1.09246	0.396285	-2.75676	0.00583774	0.0511373	204.465	248.295	297.63	126.828	108.239
359	ENSG00000124795	DEK	1697.26	-0.841388	0.305818	-2.75127	0.00593649	0.0518575	2588.91	2090.17	1506.93	1144.85	1155.43
360	ENSG00000287932	0	91.6097	-1.67935	0.610988	-2.74858	0.00598549	0.0521403	123.562	202.275	53.4578	39.1548	39.5996
361	ENSG00000196428	TSC22D2	278.193	-1.27872	0.466027	-2.74387	0.00607187	0.0527462	429.523	494.45	167.597	124.274	175.118
362	ENSG00000128710	HOXD10	382.88	-1.2114	0.441934	-2.74112	0.00612293	0.0529344	769.318	450.57	267.289	169.387	257.837
363	ENSG00000140943	MBTPS1	313.906	-1.1754	0.42884	-2.74089	0.00612729	0.0529344	492.775	511.573	208.052	186.411	170.718
364	ENSG00000140092	FBLN5	145.399	1.36272	0.49819	2.73534	0.00623151	0.0536868	100.026	43.8797	123.531	228.119	231.438
365	ENSG00000234745	HLA-B	90.5916	1.44417	0.529018	2.72991	0.00633516	0.0544303	35.3033	52.4416	72.2403	131.935	161.038
366	ENSG00000115234	SNX17	338.097	-0.960308	0.353732	-2.71479	0.00663178	0.0566683	476.594	448.429	334.473	188.113	242.877
367	ENSG00000138107	ACTR1A	983.095	-0.914436	0.33673	-2.71564	0.0066148	0.0566683	1518.04	1314.25	799.7	584.769	698.713
368	ENSG00000125166	GOT2	228.838	-1.03967	0.383522	-2.71085	0.00671113	0.0568814	348.62	286.824	229.002	132.786	146.958
369	ENSG00000168899	VAMP5	351.197	-1.33706	0.493052	-2.71179	0.00669202	0.0568814	732.543	484.817	172.654	159.173	206.798
370	ENSG00000178695	KCTD12	155.253	-1.52833	0.563733	-2.71108	0.0067064	0.0568814	313.317	246.155	71.5179	75.756	69.5193
371	ENSG00000089009	RPL6	374.603	1.14641	0.424781	2.69884	0.00695823	0.0588167	177.987	180.87	395.877	447.727	670.553
372	ENSG00000130255	RPL36	685.804	0.84816	0.314497	2.69687	0.00699938	0.0590056	419.227	511.573	626.323	853.745	1018.15
373	ENSG00000131171	SH3BGRL	170.696	-1.33321	0.494597	-2.69554	0.00702737	0.0590827	351.562	185.151	138.701	68.9465	109.119
374	ENSG00000101236	RNF24	166.473	1.1386	0.422656	2.69392	0.00706176	0.059213	97.0841	96.3213	143.036	219.607	276.317
375	ENSG00000093167	LRRFIP2	144.544	1.16874	0.434448	2.69017	0.00714152	0.0597222	85.3163	123.077	80.9091	220.459	212.958
376	ENSG00000079332	SAR1A	509.09	-0.986151	0.367261	-2.68515	0.00724977	0.0604661	736.956	775.922	392.265	321.75	318.557
377	ENSG00000143384	MCL1	222.857	1.05205	0.392299	2.68176	0.00732362	0.0609201	117.678	150.903	197.938	335.369	312.397
378	ENSG00000011105	TSPAN9	162.266	-1.49587	0.558079	-2.6804	0.00735353	0.0610071	319.201	255.787	81.6315	57.0298	97.679
379	ENSG00000102974	CTCF	369.679	-1.1153	0.416248	-2.67941	0.00737529	0.0610261	667.821	478.396	268.011	250.25	183.918
380	ENSG00000157227	MMP14	2269.25	-0.788358	0.294803	-2.67418	0.00749111	0.0618214	3056.68	3104.76	2025.62	1481.92	1677.26
381	ENSG00000067369	TP53BP1	302.411	-1.03379	0.386803	-2.67264	0.00752568	0.0618879	520.724	342.476	278.125	174.494	196.238
382	ENSG00000166963	MAP1A	1536.9	-0.733454	0.27449	-2.67206	0.00753864	0.0618879	2112.31	1695.26	1678.14	1101.44	1097.35
383	ENSG00000099901	RANBP1	877.054	-1.00773	0.378104	-2.66523	0.00769353	0.0628606	1407.72	1283.21	603.206	469.858	621.273
384	ENSG00000132424	PNISR	815.01	-1.01356	0.380439	-2.6642	0.00771726	0.0628606	1248.85	1275.72	539.635	502.203	508.635
385	ENSG00000138663	COPS4	263.667	-1.16429	0.436996	-2.66431	0.00771467	0.0628606	483.949	343.546	189.27	137.893	163.678
386	ENSG00000104866	PPP1R37	98.1158	-1.67488	0.629078	-2.66244	0.00775764	0.0628629	222.117	128.428	55.625	28.0893	56.3194
387	ENSG00000132970	WASF3	103.576	-1.51198	0.567837	-2.6627	0.00775171	0.0628629	208.878	145.552	65.7387	51.0715	46.6395
388	ENSG00000198832	SELENOM	114.025	1.45166	0.545568	2.66082	0.00779499	0.0629997	38.2452	52.4416	109.805	154.917	214.718
389	ENSG00000236248	0	132.055	-1.66432	0.62569	-2.65997	0.00781469	0.0629997	217.704	280.402	47.6786	49.3691	65.1193
390	ENSG00000198363	ASPH	628.822	0.81247	0.306338	2.6522	0.00799696	0.0641393	411.872	569.366	466.672	870.769	825.431
391	ENSG00000290018	0	98.9137	-1.44963	0.546445	-2.65284	0.00798183	0.0641393	197.11	115.586	85.2435	57.0298	39.5996
392	ENSG00000224025	0	91.8472	-1.64348	0.62042	-2.64899	0.00807336	0.0645869	194.168	136.99	47.6786	42.5596	37.8396
393	ENSG00000088247	KHSRP	726.887	0.879339	0.333499	2.63671	0.00837155	0.066802	407.459	507.292	715.901	909.073	1094.71
394	ENSG00000138069	RAB1A	238.921	-1.21413	0.460915	-2.63417	0.00843425	0.0671315	398.633	378.864	150.982	119.167	146.958
395	ENSG00000053254	FOXN3	213.284	-1.25532	0.478351	-2.62427	0.00868338	0.0680777	414.814	283.613	135.812	108.101	124.079
396	ENSG00000104388	RAB2A	755.354	-0.919244	0.350259	-2.62446	0.00867854	0.0680777	1103.23	1109.84	580.089	500.501	483.115
397	ENSG00000116521	SCAMP3	215.097	-1.05617	0.40202	-2.62717	0.00860991	0.0680777	300.078	321.071	193.604	122.572	138.159
398	ENSG00000143401	ANP32E	488.687	-1.04559	0.398242	-2.62552	0.00865162	0.0680777	923.77	542.61	381.429	263.869	331.757
399	ENSG00000156052	GNAQ	177.239	-1.10198	0.419745	-2.62536	0.00865574	0.0680777	241.239	261.138	174.099	121.72	87.9991
400	ENSG00000204592	HLA-E	233.479	0.964329	0.367047	2.62726	0.00860749	0.0680777	163.278	194.783	149.537	343.881	315.917
401	ENSG00000104884	ERCC2	151.108	-1.28713	0.491448	-2.61906	0.00881714	0.0687824	194.168	288.964	110.528	79.1608	82.7191
402	ENSG00000167522	ANKRD11	810.657	0.856337	0.326874	2.61978	0.00879871	0.0687824	444.233	611.105	779.473	1195.92	1022.55
403	ENSG00000100614	PPM1A	171.186	-1.31761	0.503516	-2.61681	0.00887557	0.0690665	364.801	192.643	118.474	89.3751	90.639
404	ENSG00000132589	FLOT2	350.025	-1.09058	0.416925	-2.61577	0.00890276	0.0691066	545.73	552.242	235.503	195.774	220.878
405	ENSG00000150316	CWC15	584.911	-0.805253	0.308092	-2.61367	0.00895748	0.0693596	807.563	680.671	629.213	437.512	369.596
406	ENSG00000148337	CIZ1	275.553	-0.907767	0.347708	-2.61072	0.0090353	0.0697899	350.091	359.6	307.021	174.494	186.558
407	ENSG00000196405	EVL	117.067	-1.48068	0.568527	-2.60442	0.00920288	0.0709097	230.942	177.659	64.2939	57.881	54.5594
408	ENSG00000174891	RSRC1	498.102	-0.965261	0.371285	-2.59978	0.00932823	0.0716993	823.744	644.283	389.375	300.471	332.636
409	ENSG00000159176	CSRP1	104.652	1.29959	0.500484	2.59668	0.00941306	0.0721745	42.6581	68.4952	85.9659	165.982	160.158
410	ENSG00000108819	PPP1R9B	122.443	-1.30439	0.502607	-2.59526	0.00945205	0.0722967	192.697	197.994	91.7452	65.5418	64.2393
411	ENSG00000163064	EN1	118.831	-1.45393	0.560911	-2.59209	0.00953961	0.0727889	264.775	134.85	78.7419	62.9882	52.7994
412	ENSG00000071127	WDR1	780.567	-1.04323	0.403457	-2.58573	0.00971737	0.0739652	1348.88	1126.96	473.896	440.066	513.035
413	ENSG00000123933	MXD4	161.57	-1.31133	0.507813	-2.58231	0.00981416	0.074521	245.652	293.245	98.2468	78.3096	92.399
414	ENSG00000067182	TNFRSF1A	390.855	-0.976561	0.378311	-2.58137	0.00984094	0.0745439	607.511	519.065	333.75	200.03	293.917
415	ENSG00000117419	ERI3	125.99	-1.23762	0.480451	-2.57596	0.00999613	0.075537	189.755	196.924	104.748	67.2441	71.2792
416	ENSG00000177954	RPS27	1305.45	-1.04885	0.40732	-2.575	0.010024	0.0755652	2103.49	2097.66	736.129	680.953	909.03
417	ENSG00000185728	YTHDF3	231.711	-1.04678	0.40795	-2.56594	0.0102896	0.0773819	407.459	242.944	226.112	143	139.039
418	ENSG00000135999	EPC2	84.074	-1.36858	0.534143	-2.5622	0.0104012	0.0780338	113.265	124.147	96.802	54.4763	31.6797
419	ENSG00000077097	TOP2B	315.442	-0.994002	0.388415	-2.55912	0.0104937	0.0785399	494.246	434.516	253.563	188.965	205.918
420	ENSG00000198886	MT-ND4	13435.1	0.714834	0.279482	2.55771	0.0105363	0.0786709	8609.59	11654.9	11811.3	20037	15062.8
421	ENSG00000175749	EIF3KP1	183.67	-1.37953	0.540081	-2.5543	0.0106402	0.0790705	389.807	251.506	90.3004	98.7382	87.9991
422	ENSG00000253558	0	95.4151	-1.50418	0.588815	-2.55458	0.0106316	0.0790705	195.639	123.077	67.9059	31.4941	58.9594
423	ENSG00000132485	ZRANB2	406.521	-0.881301	0.345712	-2.54923	0.0107961	0.0800388	611.924	501.941	379.262	258.762	280.717
424	ENSG00000008441	NFIX	1007.26	-0.865824	0.340293	-2.54434	0.0109483	0.0807857	1685.73	1169.77	832.931	657.971	689.913
425	ENSG00000130164	LDLR	175.659	-1.38221	0.543131	-2.54489	0.0109312	0.0807857	347.149	269.7	83.0763	85.9703	92.399
426	ENSG00000109332	UBE2D3	1086.17	-0.868484	0.342371	-2.53668	0.011191	0.0823827	1550.4	1577.53	850.991	626.477	825.431
427	ENSG00000129038	LOXL1	289.417	-1.33506	0.526535	-2.53556	0.0112268	0.0824523	607.511	414.182	123.531	129.381	172.478
428	ENSG00000235803	MTCO2P23	95.435	-1.73986	0.687489	-2.53075	0.011382	0.083397	198.581	166.957	32.5081	28.0893	51.0395
429	ENSG00000184983	NDUFA6	225.384	-0.995589	0.394447	-2.52401	0.0116025	0.0848145	266.246	361.74	216.721	137.893	144.318
430	ENSG00000120738	EGR1	203.825	-0.949879	0.377034	-2.51935	0.0117572	0.0855468	251.536	234.382	271.623	123.423	138.159
431	ENSG00000132912	DCTN4	200.667	-1.18125	0.468737	-2.52007	0.0117332	0.0855468	314.788	331.773	129.31	117.464	109.999
432	ENSG00000142676	RPL11	3766.63	-0.958119	0.380779	-2.51621	0.0118624	0.0861125	6600.24	5171.39	2251.01	2275.24	2535.25
433	ENSG00000197535	MYO5A	395.066	-0.895684	0.356121	-2.51511	0.0118994	0.0861812	642.814	395.988	416.104	275.786	244.637
434	ENSG00000075618	FSCN1	255.831	0.951542	0.378654	2.51296	0.0119724	0.0865101	138.271	199.064	220.333	393.251	328.237
435	ENSG00000154277	UCHL1	716.332	-0.940751	0.374982	-2.50879	0.0121146	0.0871364	1187.07	960.003	512.184	411.126	511.275
436	ENSG00000196628	TCF4	426.153	-1.09154	0.434976	-2.50942	0.0120931	0.0871364	889.937	431.306	302.687	261.316	245.517
437	ENSG00000214255	RPS2P6	101.285	-1.48328	0.591617	-2.50717	0.0121702	0.0873357	167.691	185.151	56.3474	39.1548	58.0794
438	ENSG00000101460	MAP1LC3A	105.621	-1.40922	0.562536	-2.50511	0.0122413	0.0876455	116.207	225.82	80.1867	43.4108	62.4793
439	ENSG00000118680	MYL12B	246.683	0.901883	0.360201	2.50383	0.0122857	0.0877629	163.278	178.73	206.607	359.203	325.597
440	ENSG00000084207	GSTP1	1111.91	0.770911	0.308406	2.49966	0.0124312	0.0886005	686.943	831.574	1080.71	1325.31	1635.02
441	ENSG00000169908	TM4SF1	79.959	1.31566	0.526828	2.49732	0.0125136	0.0889853	63.2517	42.8095	44.789	132.786	116.159
442	ENSG00000158321	AUTS2	90.2053	-1.59381	0.638663	-2.49554	0.0125766	0.089199	158.865	126.288	84.5211	66.3929	14.9598
443	ENSG00000196950	SLC39A10	186.399	-1.17537	0.471174	-2.49455	0.0126117	0.089199	273.601	322.141	124.253	106.399	105.599
444	ENSG00000231767	RPS27AP5	228.323	-1.27323	0.510502	-2.49406	0.0126289	0.089199	429.523	353.178	112.695	135.339	110.879
445	ENSG00000232119	MCTS1	345.181	-0.902561	0.362024	-2.49309	0.0126635	0.0892424	497.188	414.182	361.201	177.899	275.437
446	ENSG00000144043	TEX261	168.769	-1.28047	0.513964	-2.49137	0.0127253	0.0894768	323.614	240.803	98.2468	80.8632	100.319
447	ENSG00000168028	RPSA	133.337	1.21445	0.487647	2.49043	0.0127589	0.0895122	58.8388	75.9868	125.698	167.685	238.477
448	ENSG00000113916	BCL6	105.231	-1.31998	0.531705	-2.48255	0.0130446	0.0913124	157.394	180.87	77.2971	60.4346	50.1595
449	ENSG00000167978	SRRM2	1496.48	-0.818036	0.329749	-2.48078	0.0131095	0.0915618	2384.44	1830.11	1215.8	939.715	1112.31
450	ENSG00000089220	PEBP1	446.09	0.899421	0.36302	2.47761	0.0132267	0.0920783	222.117	347.827	422.606	683.507	554.394
451	ENSG00000198804	MT-CO1	2479.37	0.744856	0.300686	2.47719	0.0132421	0.0920783	1804.88	2057	1993.11	4108.7	2433.17
452	ENSG00000114019	AMOTL2	617.826	-0.835948	0.337614	-2.47605	0.0132846	0.0921693	997.318	586.49	666.055	449.429	389.836
453	ENSG00000067225	PKM	4280.02	-0.677133	0.273644	-2.4745	0.0133421	0.0921836	4932.16	4162.15	6008.22	3084.72	3212.85
454	ENSG00000161203	AP2M1	1321.09	-0.819453	0.33117	-2.47442	0.0133455	0.0921836	2082.89	1662.08	1050.37	885.239	924.87
455	ENSG00000169554	ZEB2	228.174	-1.07807	0.436866	-2.46774	0.0135969	0.0937139	372.156	326.422	169.042	116.613	156.638
456	ENSG00000116774	OLFML3	101.928	-1.25339	0.508175	-2.46645	0.0136459	0.0938455	148.568	150.903	98.9692	42.5596	68.6393
457	ENSG00000185787	MORF4L1	90.4624	1.24774	0.506117	2.46532	0.013689	0.0939356	64.7227	43.8797	66.4611	128.53	148.718
458	ENSG00000099942	CRKL	80.1173	-1.36186	0.553534	-2.46029	0.0138824	0.0950549	130.916	118.796	68.6283	40.006	42.2396
459	ENSG00000197744	PTMAP2	172.211	-1.33948	0.544902	-2.45821	0.0139633	0.0954003	404.517	160.536	117.029	68.0953	110.879
460	ENSG00000111328	CDK2AP1	470.792	-1.05591	0.429788	-2.45683	0.014017	0.0955595	835.511	673.179	274.513	270.679	300.077
461	ENSG00000111530	CAND1	204.31	-1.05574	0.430116	-2.45454	0.0141067	0.0959511	230.942	360.67	182.046	137.893	109.999
462	ENSG00000146677	RPL32P18	255.748	-1.19238	0.485932	-2.4538	0.0141357	0.0959511	478.065	376.723	135.812	144.703	143.438
463	ENSG00000025770	NCAPH2	180.969	-1.12802	0.460014	-2.45215	0.0142004	0.0961416	338.323	211.907	143.758	114.06	96.799
464	ENSG00000150961	SEC24D	283.263	-0.894654	0.364937	-2.45153	0.014225	0.0961416	369.214	403.479	270.179	198.328	175.118
465	ENSG00000056586	RC3H2	156.536	-1.0682	0.436403	-2.44773	0.014376	0.096299	160.336	260.068	173.377	86.8215	102.079
466	ENSG00000166825	ANPEP	209.662	1.27692	0.521486	2.44862	0.0143406	0.096299	44.1291	184.081	171.209	354.096	294.797
467	ENSG00000177830	CHID1	414.72	-0.841019	0.343455	-2.4487	0.0143373	0.096299	539.846	593.982	377.817	270.679	291.277
468	ENSG00000204070	SYS1	159.642	-1.07922	0.441023	-2.44708	0.0144019	0.096299	228	241.874	137.257	100.441	90.639
469	ENSG00000235761	MTCO3P46	108.833	-1.2814	0.523575	-2.44741	0.0143887	0.096299	214.762	116.656	96.0796	62.9882	53.6794
470	ENSG00000130402	ACTN4	425.905	0.84196	0.345266	2.43858	0.0147449	0.0983833	254.478	301.807	412.492	623.072	537.674
471	ENSG00000171604	CXXC5	334.296	-0.955427	0.391995	-2.43734	0.0147957	0.0985124	591.33	354.248	299.075	233.226	193.598
472	ENSG00000044574	HSPA5	1448.5	-0.683242	0.280622	-2.43474	0.0149024	0.0989369	1784.29	1907.16	1426.75	1014.62	1109.67
473	ENSG00000074964	ARHGEF10L	80.6676	-1.67963	0.689997	-2.43425	0.0149226	0.0989369	150.039	155.184	28.8961	34.8989	34.3196
474	ENSG00000136715	SAP130	118.081	-1.46474	0.602084	-2.43279	0.0149831	0.0991289	278.013	138.061	59.9594	52.7739	61.5994
475	ENSG00000162599	NFIA	134.121	-1.04716	0.430751	-2.43101	0.0150569	0.099407	185.342	149.833	171.932	83.4168	80.0792
476	ENSG00000164587	RPS14	4737.86	-0.837357	0.344821	-2.42838	0.0151663	0.0999191	7273.95	6735	3244.31	2997.9	3438.12
477	ENSG00000104131	EIF3J	254.562	0.865507	0.356689	2.4265	0.0152451	0.100076	208.878	165.887	200.106	360.905	337.036
478	ENSG00000270992	0	231.638	-1.17685	0.48504	-2.42629	0.0152539	0.100076	453.059	297.526	144.481	103.845	159.278
479	ENSG00000100316	RPL3	1406.39	-0.969577	0.399788	-2.42523	0.0152988	0.100161	2316.78	2136.19	793.921	818.846	966.23
480	ENSG00000230989	HSBP1	382.405	-0.849157	0.350657	-2.42162	0.0154517	0.100951	547.201	507.292	341.697	255.357	260.477
481	ENSG00000070444	MNT	107.392	-1.18248	0.490101	-2.41272	0.0158339	0.102382	148.568	162.676	104.026	70.6489	51.0395
482	ENSG00000110092	CCND1	734.468	0.805499	0.333762	2.41339	0.0158048	0.102382	453.059	471.975	769.359	970.358	1007.59
483	ENSG00000159377	PSMB4	84.8457	1.2405	0.514141	2.41275	0.0158325	0.102382	47.0711	58.863	58.5146	150.661	109.119
484	ENSG00000214612	RPS19P1	168.599	-1.42324	0.589361	-2.41489	0.0157399	0.102382	291.252	322.141	62.1266	69.7977	97.679
485	ENSG00000248333	CDK11B	215.877	-0.901397	0.373235	-2.41509	0.0157313	0.102382	261.833	297.526	236.226	143	140.799
486	ENSG00000006015	REX1BD	127.081	-1.18913	0.49339	-2.41012	0.0159471	0.102481	207.407	132.709	151.705	47.6667	95.919
487	ENSG00000074071	MRPS34	85.141	1.53672	0.637762	2.40955	0.0159721	0.102481	14.7097	50.3011	78.7419	145.554	136.399
488	ENSG00000118900	UBN1	443.612	-0.835131	0.346725	-2.40863	0.0160126	0.102481	663.408	559.734	392.265	290.256	312.397
489	ENSG00000119616	FCF1	632.468	-1.00008	0.41497	-2.41001	0.0159522	0.102481	1070.87	928.966	372.76	352.393	437.355
490	ENSG00000166135	HIF1AN	195.819	-1.01748	0.422377	-2.40895	0.0159986	0.102481	314.788	254.716	167.597	130.232	111.759
491	ENSG00000109919	MTCH2	426.123	-1.05246	0.437481	-2.40573	0.0161403	0.102878	732.543	640.002	240.56	257.911	259.597
492	ENSG00000256235	SMIM3	174.63	-1.07235	0.445656	-2.40623	0.0161182	0.102878	180.929	168.027	313.523	93.6311	117.039
493	ENSG00000035862	TIMP2	1644.25	-0.743629	0.309381	-2.4036	0.0162346	0.10306	2299.13	2212.18	1369.68	1184.86	1155.43
494	ENSG00000111716	LDHB	446.988	-0.949941	0.395177	-2.40384	0.0162239	0.10306	707.537	632.51	322.192	239.185	333.516
495	ENSG00000148143	ZNF462	109.611	-1.25799	0.523678	-2.40222	0.0162958	0.10324	188.284	119.867	120.641	38.3036	80.9591
496	ENSG00000126768	TIMM17B	91.3103	-1.30667	0.544195	-2.40112	0.0163451	0.103343	100.026	176.589	83.0763	50.2203	46.6395
497	ENSG00000058091	CDK14	317.449	-0.899168	0.374832	-2.39885	0.0164465	0.103359	507.485	371.372	291.128	229.822	187.438
498	ENSG00000088930	XRN2	673.871	-0.793717	0.330719	-2.39998	0.0163961	0.103359	998.789	856.19	579.367	454.536	480.475
499	ENSG00000182985	CADM1	249.218	-1.0708	0.446345	-2.39903	0.0164384	0.103359	270.659	448.429	226.834	101.292	198.878
500	ENSG00000169213	RAB3B	980.984	0.738847	0.308805	2.3926	0.0167295	0.104928	591.33	773.781	955.017	1344.88	1239.91
501	ENSG00000210082	MT-RNR2	96410.9	0.785905	0.329341	2.3863	0.017019	0.10653	55827.7	81281.3	87158.6	169224	88563.1
502	ENSG00000205339	IPO7	225.91	0.974666	0.409139	2.38224	0.0172079	0.107498	102.968	192.643	192.159	330.262	311.517
503	ENSG00000127838	PNKD	180.663	-1.11504	0.468526	-2.37989	0.0173179	0.107639	314.788	229.031	147.37	76.6072	135.519
504	ENSG00000179820	MYADM	939.81	0.952786	0.40031	2.38012	0.0173069	0.107639	382.452	560.804	1106	1348.29	1301.51
505	ENSG00000215030	RPL13P12	360.686	0.884562	0.371734	2.37956	0.0173335	0.107639	177.987	338.195	291.128	469.007	527.114
506	ENSG00000166710	B2M	1226.96	0.78744	0.331034	2.37873	0.0173724	0.107668	625.162	987.829	1237.48	1606.2	1678.14
507	ENSG00000112576	CCND3	319.551	-1.06032	0.447028	-2.37194	0.0176949	0.109314	650.169	340.335	221.055	185.56	200.638
508	ENSG00000149091	DGKZ	201.255	-1.19507	0.503894	-2.37167	0.0177077	0.109314	430.994	222.609	126.421	101.292	124.959
509	ENSG00000087191	PSMC5	728.808	-0.71012	0.299591	-2.37029	0.0177739	0.109507	987.021	849.768	752.744	486.03	568.474
510	ENSG00000123131	PRDX4	460.684	-0.97114	0.4101	-2.36806	0.0178817	0.109955	857.576	545.821	316.412	280.893	302.717
511	ENSG00000156535	CD109	112.221	-1.14221	0.483029	-2.36467	0.0180461	0.110532	157.394	110.234	163.263	52.7739	77.4392
512	ENSG00000227437	RPS8P4	248.729	-1.19263	0.504343	-2.36471	0.018044	0.110532	481.007	357.459	124.976	119.167	161.038
513	ENSG00000136379	ABHD17C	172.779	-1.02003	0.431734	-2.36264	0.0181451	0.110908	279.484	215.118	156.039	95.3335	117.919
514	ENSG00000151612	ZNF827	185.143	-1.02482	0.433939	-2.36168	0.0181924	0.110908	222.117	315.72	159.651	120.869	107.359
515	ENSG00000154146	NRGN	89.1499	-1.34994	0.571708	-2.36125	0.0182136	0.110908	154.452	132.709	66.4611	34.0477	58.0794
516	ENSG00000100941	PNN	344.342	-0.81726	0.346979	-2.35536	0.0185048	0.112256	444.233	477.326	327.971	245.143	227.038
517	ENSG00000157654	PALM2AKAP2	1006.7	0.651533	0.276621	2.35532	0.0185065	0.112256	775.201	842.277	840.877	1370.42	1204.71
518	ENSG00000205302	SNX2	138.772	-1.16548	0.49581	-2.35066	0.01874	0.113234	254.478	179.8	101.136	76.6072	81.8391
519	ENSG00000240652	0	186.632	-0.998215	0.424555	-2.3512	0.0187128	0.113234	258.891	281.472	159.651	105.548	127.599
520	ENSG00000128805	ARHGAP22	166.61	1.01764	0.433267	2.34876	0.0188361	0.113596	85.3163	111.305	156.761	257.911	221.758
521	ENSG00000083896	YTHDC1	383.7	-0.859253	0.367292	-2.33943	0.0193133	0.11625	528.078	557.594	317.857	280.893	234.078
522	ENSG00000265972	TXNIP	156.101	1.02278	0.437365	2.3385	0.0193614	0.116317	83.8453	98.4618	148.093	221.31	228.798
523	ENSG00000164543	STK17A	87.7407	1.34917	0.577635	2.33567	0.0195082	0.116975	27.9484	48.1607	85.2435	151.512	125.839
524	ENSG00000116670	MAD2L2	136.543	-1.19663	0.514233	-2.32702	0.019964	0.119252	286.839	126.288	116.307	73.2025	80.0792
525	ENSG00000226701	RPL15P14	86.7938	-1.77787	0.763995	-2.32708	0.0199612	0.119252	172.104	169.097	22.3945	52.7739	17.5998
526	ENSG00000150991	UBC	2331.85	-0.750855	0.322988	-2.32471	0.0200874	0.119761	3708.32	2765.49	1878.25	1554.28	1752.94
527	ENSG00000137821	LRRC49	85.9365	-1.32104	0.568441	-2.32397	0.020127	0.119769	161.807	113.445	64.2939	40.8572	49.2795
528	ENSG00000235162	C12orf75	336.979	0.768875	0.331053	2.32251	0.0202054	0.120008	239.768	283.613	265.122	425.596	470.795
529	ENSG00000068323	TFE3	240.248	-1.04311	0.449573	-2.32022	0.0203292	0.120287	473.653	246.155	188.547	134.488	158.398
530	ENSG00000184164	CRELD2	90.4133	-1.14447	0.49318	-2.32059	0.0203092	0.120287	120.62	119.867	106.916	53.6251	51.0395
531	ENSG00000182054	IDH2	98.7964	-1.32997	0.573436	-2.31929	0.0203793	0.120357	197.11	131.639	62.1266	47.6667	55.4394
532	ENSG00000136045	PWP1	460.024	-0.805816	0.347745	-2.31726	0.0204894	0.12078	538.375	713.848	413.214	331.965	302.717
533	ENSG00000107223	EDF1	198.605	1.11134	0.480119	2.31471	0.0206288	0.121373	73.5485	111.305	220.333	286	301.837
534	ENSG00000131462	TUBG1	153.744	-1.20909	0.52271	-2.31312	0.0207163	0.12166	273.601	237.593	85.9659	79.1608	92.399
535	ENSG00000188529	SRSF10	361.381	-0.802417	0.34722	-2.31098	0.0208341	0.122123	470.711	492.309	344.586	223.863	275.437
536	ENSG00000172954	LCLAT1	87.654	-1.47868	0.640588	-2.30831	0.020982	0.122761	150.039	160.536	43.3442	29.7917	54.5594
537	ENSG00000174851	YIF1A	263.699	-0.841402	0.365217	-2.30384	0.0212315	0.123989	363.33	330.703	267.289	159.173	197.998
538	ENSG00000198695	MT-ND6	610.32	0.787845	0.342156	2.30259	0.0213019	0.124168	360.388	500.871	556.25	989.936	644.153
539	ENSG00000129255	MPDU1	152.695	-1.18783	0.516848	-2.29821	0.0215496	0.125255	291.252	173.378	126.421	53.6251	118.799
540	ENSG00000169221	TBC1D10B	156.378	-1.11146	0.483686	-2.29789	0.0215681	0.125255	280.955	204.415	112.695	80.8632	102.959
541	ENSG00000215301	DDX3X	494.54	-0.769876	0.336626	-2.28703	0.0221938	0.12865	533.962	764.149	479.676	346.435	348.476
542	ENSG00000164733	CTSB	3366.02	0.709285	0.311064	2.28019	0.0225965	0.130743	1846.07	2735.53	3468.98	4217.65	4561.87
543	ENSG00000164761	TNFRSF11B	304.989	0.827211	0.362934	2.27924	0.0226531	0.130829	175.045	279.332	243.45	444.322	382.796
544	ENSG00000066322	ELOVL1	120.862	-1.08085	0.475385	-2.27363	0.0229884	0.132521	183.871	171.238	104.748	74.0537	70.3993
545	ENSG00000072518	MARK2	95.1906	-1.25244	0.551448	-2.27119	0.0231355	0.132881	108.852	187.291	75.8523	48.5179	55.4394
546	ENSG00000166913	YWHAB	4627.91	-0.628651	0.27678	-2.2713	0.0231287	0.132881	6410.49	5384.36	4374.15	3273.68	3696.84
547	ENSG00000002586	CD99	159.945	0.912407	0.402116	2.26902	0.0232673	0.133288	119.149	127.358	108.36	220.459	224.398
548	ENSG00000028277	POU2F2	294.788	1.10426	0.486903	2.26792	0.0233339	0.133288	98.555	151.974	353.255	498.798	371.356
549	ENSG00000154096	THY1	173.969	0.94111	0.414905	2.26825	0.0233137	0.133288	114.736	102.743	163.263	239.185	249.917
550	ENSG00000116132	PRRX1	1660.57	-0.62821	0.277084	-2.26722	0.0233767	0.13329	2079.95	1684.55	2036.45	1376.38	1125.51
551	ENSG00000079462	PAFAH1B3	252.884	-1.04392	0.460794	-2.26549	0.0234827	0.133651	441.291	363.881	150.982	148.107	160.158
552	ENSG00000204681	GABBR1	116.044	-1.12236	0.495629	-2.26452	0.0235423	0.133748	188.284	92.0404	163.985	66.3929	69.5193
553	ENSG00000100280	AP1B1	268.028	-0.982368	0.434187	-2.26255	0.0236637	0.133806	448.646	375.653	178.434	171.09	166.318
554	ENSG00000171858	RPS21	979.058	-0.915255	0.404583	-2.26222	0.0236837	0.133806	1738.69	1296.06	582.979	551.572	725.992
555	ENSG00000172500	FIBP	357.651	-0.846425	0.374376	-2.26089	0.0237658	0.133806	436.878	550.102	317.857	199.179	284.237
556	ENSG00000240376	0	147.692	-1.35132	0.597541	-2.26147	0.02373	0.133806	341.265	184.081	60.6818	72.3513	80.0792
557	ENSG00000291080	ZNF252P	169.049	-0.933887	0.413019	-2.26113	0.0237515	0.133806	255.949	196.924	174.099	102.994	115.279
558	ENSG00000138032	PPM1B	97.365	-1.32896	0.588512	-2.25817	0.0239348	0.134515	182.4	141.271	61.4042	35.75	65.9993
559	ENSG00000010244	ZNF207	321.262	-0.873637	0.387385	-2.25522	0.0241198	0.135231	472.182	434.516	271.623	172.792	255.197
560	ENSG00000132823	OSER1	108.818	-1.1475	0.508924	-2.25476	0.0241484	0.135231	185.342	146.622	86.6883	63.8394	61.5994
561	ENSG00000012983	MAP4K5	307.676	-0.899144	0.399651	-2.24982	0.0244604	0.136734	432.465	470.904	230.447	188.965	215.598
562	ENSG00000157613	CREB3L1	450.799	0.710632	0.316067	2.24836	0.0245532	0.137008	397.162	356.389	325.081	633.287	542.074
563	ENSG00000071462	BUD23	133.293	1.08459	0.482619	2.2473	0.0246211	0.137144	66.1937	131.639	78.0195	159.173	231.438
564	ENSG00000125534	PPDPF	830.557	1.0444	0.465413	2.24403	0.0248302	0.137384	303.02	357.459	1085.77	1021.43	1385.11
565	ENSG00000131495	NDUFA2	92.2835	-1.28727	0.573444	-2.24481	0.0247806	0.137384	123.562	177.659	61.4042	45.1132	53.6794
566	ENSG00000132963	POMP	822.257	-0.765449	0.340935	-2.24515	0.0247587	0.137384	1215.02	1062.75	676.169	489.435	667.913
567	ENSG00000228253	MT-ATP8	5092.62	0.76615	0.341438	2.24389	0.0248395	0.137384	4031.93	5191.72	2710.46	8556.18	4972.83
568	ENSG00000173559	NABP1	100.926	1.11499	0.497252	2.24231	0.0249412	0.137704	86.7873	58.863	61.4042	177.899	119.679
569	ENSG00000256849	TCP1P3	82.4701	-1.39039	0.62031	-2.24144	0.0249975	0.137772	125.032	156.255	47.6786	32.3453	51.0395
570	ENSG00000071082	RPL31	389.729	0.778198	0.3475	2.23942	0.0251284	0.13825	258.891	379.934	270.179	457.09	582.554
571	ENSG00000175215	CTDSP2	105.182	-1.16196	0.519104	-2.23839	0.0251956	0.138377	167.691	158.395	79.4643	57.881	62.4793
572	ENSG00000067167	TRAM1	129.291	0.987302	0.44123	2.23761	0.0252464	0.138414	73.5485	99.532	104.748	184.709	183.918
573	ENSG00000168003	SLC3A2	147.189	1.28036	0.572406	2.2368	0.0252992	0.138461	44.1291	56.7226	178.434	235.78	220.878
574	ENSG00000067533	RRP15	110.495	1.23876	0.554204	2.2352	0.0254039	0.138792	55.8969	38.5285	119.196	180.453	158.398
575	ENSG00000139318	DUSP6	235.642	0.90968	0.407598	2.23181	0.0256277	0.139771	204.465	111.305	207.33	352.393	302.717
576	ENSG00000054523	KIF1B	189.633	-0.96593	0.433162	-2.22995	0.0257507	0.140014	329.497	214.047	163.985	118.316	122.319
577	ENSG00000117020	AKT3	170.643	-0.908539	0.407578	-2.22912	0.0258061	0.140014	238.297	222.609	169.042	111.506	111.759
578	ENSG00000131013	PPIL4	88.2671	1.26244	0.566187	2.22972	0.025766	0.140014	30.8904	50.3011	87.4107	131.935	140.799
579	ENSG00000006042	TMEM98	270.051	-0.919674	0.413235	-2.22555	0.0260446	0.140894	394.22	400.269	204.44	149.81	201.518
580	ENSG00000123066	MED13L	397.324	-0.805236	0.361848	-2.22534	0.0260583	0.140894	589.859	489.098	359.757	321.75	226.158
581	ENSG00000169439	SDC2	114.605	-1.26072	0.567031	-2.22337	0.0261909	0.141368	219.175	159.465	70.0731	45.1132	79.1992
582	ENSG00000118985	ELL2	93.6065	1.29094	0.580878	2.2224	0.0262566	0.141429	23.5355	75.9868	77.2971	131.935	159.278
583	ENSG00000119414	PPP6C	132.528	-1.18333	0.532585	-2.22186	0.0262925	0.141429	279.484	142.342	91.0228	72.3513	77.4392
584	ENSG00000151366	NDUFC2	179.878	-0.916154	0.412472	-2.22113	0.0263421	0.141453	278.013	212.977	174.099	123.423	110.879
585	ENSG00000108848	LUC7L3	1015.89	-0.694653	0.312924	-2.21988	0.0264271	0.141667	1463.62	1256.46	878.442	731.174	749.752
586	ENSG00000159167	STC1	2351.47	0.973374	0.438975	2.21738	0.0265971	0.142335	895.821	1076.66	3117.17	3692.47	2975.25
587	ENSG00000085377	PREP	98.0042	-1.37717	0.621333	-2.21648	0.0266587	0.142422	144.155	199.064	46.9562	40.006	59.8394
588	ENSG00000007384	RHBDF1	130.977	-1.01587	0.458806	-2.21416	0.0268175	0.143027	208.878	162.676	121.364	76.6072	85.3591
589	ENSG00000034510	TMSB10	2396.62	-0.864477	0.390842	-2.21183	0.0269783	0.14364	4048.11	3373.39	1350.89	1492.99	1717.74
590	ENSG00000111605	CPSF6	150.091	-1.06573	0.482618	-2.20822	0.0272288	0.144728	228	237.593	104.026	91.0775	89.7591
591	ENSG00000124783	SSR1	486.786	-0.728535	0.330532	-2.20413	0.0275155	0.146004	610.453	592.911	532.411	276.637	421.516
592	ENSG00000100106	TRIOBP	109.691	1.09751	0.498606	2.20115	0.0277256	0.146871	51.484	107.024	67.1835	161.726	161.038
593	ENSG00000077380	DYNC1I2	740.514	-0.753455	0.343125	-2.19586	0.0281018	0.147342	1197.37	793.046	663.888	592.429	455.835
594	ENSG00000105723	GSK3A	159.085	-1.03369	0.471011	-2.19463	0.0281904	0.147342	255.949	231.171	113.417	91.9287	102.959
595	ENSG00000108107	RPL28	1662.35	-0.724505	0.329986	-2.19556	0.0281234	0.147342	2519.77	2141.54	1262.04	1167.83	1220.55
596	ENSG00000133884	DPF2	79.626	-1.16965	0.532209	-2.19772	0.0279692	0.147342	97.0841	126.288	83.7987	42.5596	48.3995
597	ENSG00000163468	CCT3	936.447	-0.741112	0.337109	-2.19843	0.0279182	0.147342	1325.34	1302.48	720.236	646.906	687.273
598	ENSG00000179010	MRFAP1	155.488	0.898464	0.408942	2.19705	0.0280172	0.147342	107.381	108.094	130.755	207.691	223.518
599	ENSG00000185215	TNFAIP2	88.6694	1.19335	0.54333	2.19637	0.0280657	0.147342	44.1291	43.8797	86.6883	122.572	146.078
600	ENSG00000197045	GMFB	132.677	-1.06497	0.485198	-2.19493	0.028169	0.147342	223.588	151.974	127.865	57.881	102.079
601	ENSG00000087074	PPP1R15A	130.152	0.978238	0.446963	2.18864	0.0286233	0.149356	107.381	103.813	70.7955	180.453	188.318
602	ENSG00000087077	TRIP6	83.2212	1.12623	0.51507	2.18655	0.0287755	0.149651	48.542	69.5654	51.2906	120.869	125.839
603	ENSG00000104643	MTMR9	108.842	-1.1091	0.507088	-2.1872	0.028728	0.149651	201.523	109.164	105.471	64.6906	63.3593
604	ENSG00000111678	C12orf57	220.932	-1.09043	0.499062	-2.18496	0.0288915	0.150006	481.007	217.258	143.758	118.316	144.318
605	ENSG00000183287	CCBE1	232.153	-0.866962	0.397015	-2.1837	0.0289842	0.150239	350.091	295.385	205.162	171.09	139.039
606	ENSG00000089280	FUS	717.928	-0.840184	0.385165	-2.18136	0.0291568	0.150884	1187.07	962.143	467.395	501.352	471.675
607	ENSG00000167552	TUBA1A	451.203	-0.809131	0.371854	-2.17594	0.02956	0.152718	636.93	643.212	354.7	263.018	358.156
608	ENSG00000210196	MT-TP	513.561	0.665278	0.306037	2.17385	0.0297162	0.153273	413.343	460.202	374.927	643.501	675.833
609	ENSG00000126247	CAPNS1	593.507	0.690424	0.318013	2.17106	0.0299268	0.154106	407.459	427.025	593.815	776.287	762.952
610	ENSG00000088986	DYNLL1	245.983	0.84169	0.388368	2.16725	0.0302161	0.154469	167.691	151.974	239.838	290.256	380.156
611	ENSG00000153317	ASAP1	343.431	0.72902	0.336036	2.16947	0.030047	0.154469	239.768	317.86	257.898	452.834	448.795
612	ENSG00000163479	SSR2	111.193	0.994572	0.459056	2.16656	0.0302685	0.154469	86.7873	74.9166	77.2971	177.048	139.919
613	ENSG00000196419	XRCC6	287.709	-0.762712	0.351679	-2.16877	0.0301	0.154469	301.549	404.55	326.526	200.881	205.038
614	ENSG00000204256	BRD2	672.511	-0.711504	0.328211	-2.16783	0.0301718	0.154469	914.944	878.665	596.705	420.489	551.754
615	ENSG00000226144	RPS27AP3	166.998	-1.26709	0.584928	-2.16624	0.0302928	0.154469	370.685	215.118	68.6283	73.2025	107.359
616	ENSG00000048740	CELF2	119.694	-1.1632	0.537263	-2.16505	0.0303838	0.154681	195.639	193.713	72.2403	63.8394	73.0392
617	ENSG00000112769	LAMA4	220.796	0.892891	0.412718	2.16344	0.0305074	0.154808	108.852	220.469	163.263	291.959	319.437
618	ENSG00000204599	TRIM39	101.865	-1.06304	0.491344	-2.16354	0.0305	0.154808	138.271	151.974	96.0796	57.881	65.1193
619	ENSG00000135387	CAPRIN1	252.435	-0.861417	0.398482	-2.16175	0.0306378	0.154968	404.517	307.158	212.386	176.197	161.918
620	ENSG00000181467	RAP2B	133.632	-1.25881	0.582206	-2.16214	0.0306071	0.154968	200.052	264.349	58.5146	76.6072	68.6393
621	ENSG00000168685	IL7R	348.713	0.786226	0.364402	2.15758	0.0309604	0.156096	205.936	248.295	355.422	434.959	498.955
622	ENSG00000196549	MME	204.579	0.875556	0.405743	2.15791	0.030935	0.156096	129.445	125.218	204.44	294.512	269.277
623	ENSG00000197077	KIAA1671	102.933	-1.23685	0.573599	-2.1563	0.0310602	0.156348	179.458	151.974	70.0731	36.6012	76.5592
624	ENSG00000090686	USP48	270.918	-0.805891	0.373926	-2.15522	0.0311449	0.156389	417.756	288.964	274.513	200.881	172.478
625	ENSG00000102024	PLS3	254.571	-0.916858	0.425567	-2.15444	0.0312057	0.156389	429.523	316.79	195.049	137.893	193.598
626	ENSG00000145730	PAM	364.23	-0.728894	0.338347	-2.15428	0.031218	0.156389	482.478	456.991	359.757	283.447	238.477
627	ENSG00000152102	FAM168B	162.487	-0.941783	0.437784	-2.15125	0.0314565	0.157333	222.117	239.733	141.591	91.0775	117.919
628	ENSG00000075624	ACTB	1899.11	0.671749	0.313203	2.14477	0.0319713	0.158894	1254.74	1262.88	2085.58	2327.16	2565.17
629	ENSG00000100292	HMOX1	125.995	-1.10292	0.514206	-2.1449	0.0319605	0.158894	148.568	92.0404	239.838	80.012	69.5193
630	ENSG00000130706	ADRM1	83.9527	1.16192	0.541592	2.14538	0.0319222	0.158894	33.8323	67.4249	66.4611	119.167	132.879
631	ENSG00000143702	CEP170	103.004	1.00358	0.467604	2.14623	0.0318548	0.158894	73.5485	71.7059	75.1299	160.875	133.759
632	ENSG00000154001	PPP2R5E	573.222	-0.661494	0.308861	-2.14172	0.0322162	0.159644	622.221	602.543	791.031	434.959	415.356
633	ENSG00000166033	HTRA1	379.854	-0.701783	0.327687	-2.14162	0.032224	0.159644	432.465	442.008	472.451	242.59	309.757
634	ENSG00000122299	ZC3H7A	162.435	-0.897425	0.419484	-2.13936	0.0324068	0.160296	250.065	180.87	167.597	109.804	103.839
635	ENSG00000235459	RPS26P31	103.922	-1.26976	0.594117	-2.13722	0.0325799	0.160899	228	114.515	65.0163	42.5596	69.5193
636	ENSG00000170430	MGMT	109.08	-1.01485	0.475246	-2.13542	0.0327269	0.161322	145.626	113.445	150.982	57.0298	78.3192
637	ENSG00000173320	STOX2	86.9376	-1.26357	0.59186	-2.13491	0.0327685	0.161322	166.22	118.796	55.625	55.3275	38.7196
638	ENSG00000022840	RNF10	293.548	-0.883761	0.415198	-2.12853	0.0332933	0.163649	445.704	414.182	218.888	155.768	233.198
639	ENSG00000116062	MSH6	105.964	-1.08593	0.510569	-2.1269	0.0334283	0.163799	107.381	176.589	119.196	80.012	46.6395
640	ENSG00000117395	EBNA1BP2	307.303	0.754249	0.354543	2.12739	0.0333881	0.163799	261.833	272.91	189.27	382.185	430.315
641	ENSG00000072062	PRKACA	209.45	-1.07502	0.505778	-2.12547	0.0335472	0.164125	375.097	303.947	117.029	92.7799	158.398
642	ENSG00000071054	MAP4K4	2831.19	-0.691324	0.325709	-2.12252	0.033794	0.165075	4137.84	3781.15	2101.47	1963.7	2171.82
643	ENSG00000116729	WLS	191.229	-0.810681	0.382245	-2.12084	0.0339353	0.16525	251.536	224.75	216.721	129.381	133.759
644	ENSG00000270647	TAF15	224.738	-0.821008	0.387053	-2.12118	0.0339068	0.16525	276.542	326.422	213.109	141.298	166.318
645	ENSG00000077684	JADE1	84.8981	-1.45895	0.690341	-2.11337	0.0345688	0.168047	160.336	151.974	29.6185	30.6429	51.9195
646	ENSG00000102755	FLT1	157.104	0.936116	0.443066	2.11281	0.0346168	0.168047	73.5485	134.85	135.812	221.31	219.998
647	ENSG00000108091	CCDC6	113.371	-1.02241	0.484712	-2.10932	0.0349168	0.169241	161.807	160.536	104.748	82.5656	57.1994
648	ENSG00000150459	SAP18	179.38	-0.930514	0.441966	-2.1054	0.0352567	0.170625	279.484	248.295	137.257	117.464	114.399
649	ENSG00000106070	GRB10	87.4151	-1.08977	0.517981	-2.10388	0.035389	0.171001	126.503	122.007	84.5211	45.9643	58.0794
650	ENSG00000115211	EIF2B4	226.801	-0.81646	0.388376	-2.10224	0.0355319	0.171428	338.323	215.118	269.456	142.149	168.958
651	ENSG00000137962	ARHGAP29	329.155	0.789556	0.376329	2.09804	0.0359013	0.172775	276.542	317.86	171.209	463.048	417.116
652	ENSG00000179632	MAF1	323.383	-0.794183	0.378576	-2.09782	0.0359212	0.172775	479.536	417.392	271.623	194.923	253.437
653	ENSG00000160584	SIK3	109.564	-1.28152	0.611242	-2.09658	0.0360307	0.173036	270.659	75.9868	83.7987	68.0953	49.2795
654	ENSG00000134644	PUM1	288.472	-0.760324	0.363111	-2.09391	0.0362676	0.173448	355.975	409.901	269.456	194.072	212.958
655	ENSG00000135930	EIF4E2	554.82	-0.661103	0.315629	-2.09456	0.0362103	0.173448	763.434	645.353	543.247	385.59	436.475
656	ENSG00000167772	ANGPTL4	94.5742	1.18444	0.565703	2.09375	0.0362825	0.173448	36.7743	48.1607	101.859	127.679	158.398
657	ENSG00000089693	MLF2	444.637	-0.79973	0.382419	-2.09124	0.0365067	0.17399	778.143	443.078	387.208	270.679	344.076
658	ENSG00000181019	NQO1	432.376	0.789561	0.377525	2.09141	0.0364909	0.17399	238.297	282.543	481.843	538.804	620.393
659	ENSG00000095752	IL11	211.623	-0.937063	0.448417	-2.08971	0.0366437	0.174269	320.672	307.158	157.484	103.845	168.958
660	ENSG00000116754	SRSF11	1511.29	-0.668014	0.319724	-2.08935	0.0366766	0.174269	2357.97	1702.75	1263.48	1126.13	1106.15
661	ENSG00000125686	MED1	365.99	-0.828076	0.396571	-2.08809	0.0367895	0.174493	641.343	400.269	289.684	268.977	229.678
662	ENSG00000213130	EEF1DP5	87.2912	-1.34871	0.646061	-2.08759	0.036835	0.174493	207.407	94.1809	44.789	42.5596	47.5195
663	ENSG00000109917	ZPR1	95.0348	1.15076	0.551458	2.08676	0.0369099	0.174585	66.1937	33.1773	91.7452	135.339	148.718
664	ENSG00000109881	CCDC34	237.732	-0.901489	0.432276	-2.08545	0.0370284	0.174618	401.575	303.947	171.209	143.851	168.078
665	ENSG00000120913	PDLIM2	139.415	-1.18814	0.569646	-2.08576	0.0370006	0.174618	180.929	292.175	66.4611	78.3096	79.1992
666	ENSG00000177156	TALDO1	518.406	-0.744587	0.357448	-2.08306	0.0372455	0.175261	823.744	595.052	436.331	327.709	409.196
667	ENSG00000213216	0	102.665	-1.25325	0.601736	-2.08272	0.0372766	0.175261	176.516	176.589	48.401	50.2203	61.5994
668	ENSG00000116977	LGALS8	110.167	-1.14354	0.549332	-2.0817	0.0373697	0.175395	226.529	119.867	77.2971	65.5418	61.5994
669	ENSG00000211584	SLC48A1	99.7031	-1.07105	0.514634	-2.08119	0.0374169	0.175395	135.329	153.044	90.3004	73.2025	46.6395
670	ENSG00000085733	CTTN	128.3	0.953992	0.459232	2.07736	0.037768	0.176386	94.1421	72.7761	112.695	149.81	212.078
671	ENSG00000100030	MAPK1	224.969	-0.920232	0.443437	-2.07522	0.0379658	0.176386	330.968	342.476	158.929	172.792	119.679
672	ENSG00000125817	CENPB	393.73	-0.778941	0.375289	-2.07558	0.037933	0.176386	669.292	387.426	361.924	259.613	290.397
673	ENSG00000125834	STK35	100.45	-1.22217	0.588682	-2.07611	0.0378836	0.176386	110.323	218.328	62.1266	60.4346	51.0395
674	ENSG00000240311	0	82.6547	-1.35803	0.653486	-2.07814	0.0376967	0.176386	169.162	123.077	36.1201	39.1548	45.7595
675	ENSG00000251562	MALAT1	232.256	0.970955	0.467635	2.07631	0.0378653	0.176386	76.4905	186.221	239.115	354.096	305.357
676	ENSG00000102172	SMS	281.305	0.814844	0.393064	2.07306	0.0381669	0.176997	141.213	271.84	233.336	421.34	338.796
677	ENSG00000233913	RPL10P9	608.47	-1.0428	0.503135	-2.07259	0.0382102	0.176997	1209.14	860.471	229.724	303.024	439.995
678	ENSG00000130741	EIF2S3	110.882	0.942742	0.455019	2.07187	0.0382774	0.177047	75.0195	89.8999	78.0195	157.47	153.998
679	ENSG00000173264	GPR137	103.765	-1.07264	0.518303	-2.06951	0.0384979	0.177805	148.568	166.957	78.7419	63.8394	60.7194
680	ENSG00000133704	IPO8	130.089	-1.00369	0.485279	-2.06828	0.0386133	0.178075	157.394	224.75	106.193	72.3513	89.7591
681	ENSG00000125743	SNRPD2	151.993	0.908501	0.439517	2.06704	0.0387299	0.178089	80.9034	143.412	112.695	191.518	231.438
682	ENSG00000173457	PPP1R14B	186.124	-0.878908	0.425172	-2.06718	0.0387169	0.178089	241.239	286.824	155.317	131.084	116.159
683	ENSG00000086758	HUWE1	567.386	-0.709531	0.344052	-2.06228	0.0391809	0.179636	767.847	790.905	457.281	394.102	426.796
684	ENSG00000178188	SH2B1	83.8122	-1.12558	0.545661	-2.06279	0.0391328	0.179636	120.62	132.709	67.9059	47.6667	50.1595
685	ENSG00000114850	SSR3	448.248	0.63211	0.307017	2.05888	0.039506	0.180599	364.801	377.794	359.757	566.894	571.994
686	ENSG00000141837	CACNA1A	287.951	-0.744475	0.361544	-2.05915	0.0394797	0.180599	429.523	297.526	303.409	205.137	204.158
687	ENSG00000105221	AKT2	262.965	-0.754371	0.367381	-2.05337	0.0400362	0.182491	375.097	315.72	252.119	192.369	179.518
688	ENSG00000253276	CCDC71L	79.9271	1.21462	0.591462	2.05358	0.0400163	0.182491	44.1291	28.8964	83.0763	110.655	132.879
689	ENSG00000163682	RPL9	533.088	0.847046	0.41269	2.0525	0.0401212	0.182613	233.884	360.67	615.487	575.405	879.991
690	ENSG00000198668	CALM1	2154.22	-0.585385	0.285579	-2.04982	0.040382	0.183533	3021.37	2414.45	2022.73	1578.96	1733.58
691	ENSG00000182636	NDN	134.616	-0.891783	0.435329	-2.04853	0.0405083	0.183841	186.813	164.817	143.758	80.012	97.679
692	ENSG00000063245	EPN1	609.725	-0.737416	0.360207	-2.0472	0.0406385	0.184165	989.963	690.303	498.458	376.227	493.675
693	ENSG00000028310	BRD9	372.493	-0.696714	0.340927	-2.04359	0.0409945	0.184182	510.427	460.202	349.643	282.596	259.597
694	ENSG00000121579	NAA50	240.789	-0.886284	0.433625	-2.04389	0.0409639	0.184182	395.691	313.579	176.266	186.411	131.999
695	ENSG00000121766	ZCCHC17	232.928	-0.925542	0.452667	-2.04464	0.0408903	0.184182	428.052	270.77	163.985	130.232	171.598
696	ENSG00000167193	CRK	181.526	0.820339	0.401347	2.04397	0.0409567	0.184182	107.381	151.974	156.761	245.994	245.517
697	ENSG00000176170	SPHK1	109.598	1.11146	0.543659	2.0444	0.0409136	0.184182	35.3033	75.9868	111.972	155.768	168.958
698	ENSG00000196586	MYO6	389.258	-0.661666	0.323396	-2.04599	0.0407571	0.184182	495.717	412.041	461.615	270.679	306.237
699	ENSG00000145685	LHFPL2	109.548	-1.0098	0.494743	-2.04107	0.041244	0.185038	141.213	176.589	93.9124	62.9882	73.0392
700	ENSG00000162493	PDPN	224.134	-0.98955	0.486132	-2.03556	0.0417946	0.18724	463.356	229.031	147.37	124.274	156.638
701	ENSG00000243279	PRAF2	145.113	-0.907978	0.446237	-2.03474	0.0418767	0.18734	189.755	212.977	132.922	108.953	80.9591
702	ENSG00000162236	STX5	148.454	-0.92445	0.45486	-2.03238	0.0421149	0.187901	197.11	147.693	204.44	68.9465	124.079
703	ENSG00000175352	NRIP3	110.862	-0.995658	0.489914	-2.03231	0.0421219	0.187901	182.4	135.92	97.5244	68.9465	69.5193
704	ENSG00000108578	BLMH	204.355	-0.95547	0.470661	-2.03006	0.0423503	0.188384	367.743	240.803	152.427	94.4823	166.318
705	ENSG00000213862	RPL7AP62	294.906	-1.14447	0.563643	-2.03048	0.0423074	0.188384	639.872	385.285	108.36	116.613	224.398
706	ENSG00000197170	PSMD12	103.362	1.09054	0.537853	2.02757	0.042604	0.189244	36.7743	75.9868	99.6916	133.637	170.718
707	ENSG00000114861	FOXP1	433.427	-0.64027	0.316097	-2.02555	0.0428108	0.189625	557.498	450.57	510.016	323.453	325.597
708	ENSG00000134265	NAPG	94.1856	1.46098	0.7211	2.02605	0.0427602	0.189625	7.35485	59.9333	97.5244	133.637	172.478
709	ENSG00000160710	ADAR	87.5914	1.17442	0.580063	2.02464	0.0429043	0.189771	26.4775	87.7594	59.9594	137.042	126.719
710	ENSG00000109066	TMEM104	103.778	-1.06615	0.52759	-2.02079	0.0433014	0.189821	144.155	168.027	81.6315	48.5179	76.5592
711	ENSG00000122026	RPL21	428.846	0.834632	0.413097	2.02043	0.0433392	0.189821	197.11	285.753	494.846	478.37	688.153
712	ENSG00000124942	AHNAK	578.819	0.729687	0.360839	2.02219	0.0431565	0.189821	280.955	541.54	550.471	713.299	807.831
713	ENSG00000136240	KDELR2	297.271	-0.870312	0.430588	-2.02122	0.0432571	0.189821	466.298	427.025	196.494	165.982	230.558
714	ENSG00000137154	RPS6	2166.39	0.671329	0.33217	2.02104	0.0432759	0.189821	1156.18	1658.87	2436.66	2776.59	2803.65
715	ENSG00000173418	NAA20	161.621	-1.16181	0.574584	-2.02199	0.0431769	0.189821	304.491	255.787	62.849	98.7382	86.2391
716	ENSG00000180304	OAZ2	206.414	-0.871106	0.430477	-2.02359	0.0430128	0.189821	275.071	326.422	155.317	135.339	139.919
717	ENSG00000100603	SNW1	280.447	-0.842371	0.417111	-2.01954	0.0434314	0.18996	501.601	301.807	219.61	183.857	195.358
718	ENSG00000162909	CAPN2	593.423	-0.701242	0.347378	-2.01867	0.0435211	0.190087	832.569	808.029	464.505	427.298	434.715
719	ENSG00000060237	WNK1	551.849	-0.635993	0.315523	-2.01568	0.0438333	0.191184	672.234	726.691	532.411	446.876	381.036
720	ENSG00000075785	RAB7A	633.706	-0.602703	0.299605	-2.01166	0.0442562	0.192761	826.685	729.902	645.828	471.56	494.555
721	ENSG00000177732	SOX12	153.7	-0.989606	0.492328	-2.01005	0.0444255	0.193229	282.426	185.151	108.36	82.5656	109.999
722	ENSG00000126062	TMEM115	128.311	-1.01146	0.504526	-2.00477	0.044988	0.193905	217.704	165.887	98.9692	60.4346	98.559
723	ENSG00000133687	TMTC1	102.526	1.06044	0.528715	2.00569	0.044889	0.193905	38.2452	95.2511	80.1867	163.429	135.519
724	ENSG00000138767	CNOT6L	81.6179	-1.0571	0.526575	-2.00751	0.0446955	0.193905	105.91	102.743	100.414	38.3036	60.7194
725	ENSG00000139645	ANKRD52	145.114	-0.873062	0.435464	-2.0049	0.0449736	0.193905	217.704	172.308	142.313	88.5239	104.719
726	ENSG00000152404	CWF19L2	140.597	-0.975438	0.486032	-2.00694	0.0447557	0.193905	232.413	102.743	189.992	75.756	102.079
727	ENSG00000183011	NAA38	308.967	-0.742687	0.370505	-2.00453	0.0450136	0.193905	463.356	363.881	278.125	197.476	241.997
728	ENSG00000198242	RPL23A	1546.07	0.528877	0.263568	2.0066	0.0447919	0.193905	1269.45	1384.89	1285.88	1846.23	1943.9
729	ENSG00000115216	NRBP1	209.128	-0.942124	0.470906	-2.00066	0.0454289	0.194127	386.865	255.787	134.367	123.423	145.198
730	ENSG00000134363	FST	407.561	0.70698	0.353149	2.00193	0.0452918	0.194127	320.672	237.593	416.826	529.441	533.274
731	ENSG00000138668	HNRNPD	740.664	-0.802671	0.401217	-2.00059	0.0454365	0.194127	1194.43	1053.11	432.719	531.144	491.915
732	ENSG00000148248	SURF4	621.079	-0.695512	0.347399	-2.00206	0.0452784	0.194127	845.808	874.384	480.398	463.048	441.755
733	ENSG00000173726	TOMM20	81.3223	1.19835	0.598653	2.00175	0.0453118	0.194127	25.0065	82.4083	52.7354	102.143	144.318
734	ENSG00000183386	FHL3	113.735	-0.940513	0.46993	-2.00139	0.0453504	0.194127	170.633	143.412	108.36	72.3513	73.9192
735	ENSG00000099917	MED15	153.415	-0.849293	0.425545	-1.99578	0.0459583	0.196089	205.936	164.817	189.27	122.572	84.4791
736	ENSG00000123064	DDX54	319.175	-0.801161	0.401944	-1.99322	0.0462378	0.196995	460.414	467.694	226.834	232.375	208.558
737	ENSG00000176407	KCMF1	182.386	-0.804888	0.403922	-1.99268	0.0462964	0.196995	197.11	246.155	216.721	148.107	103.839
738	ENSG00000100503	NIN	132.002	1.06117	0.532696	1.99208	0.0463627	0.19701	38.2452	114.515	122.086	216.203	168.958
739	ENSG00000244398	RPL36AP37	651.864	-0.629532	0.316167	-1.99114	0.0464658	0.197181	814.918	834.785	628.49	417.935	563.194
740	ENSG00000241837	ATP5PO	86.9861	1.15228	0.579494	1.98842	0.0467657	0.198186	26.4775	63.144	84.5211	120.869	139.919
741	ENSG00000075415	SLC25A3	360.292	-0.795466	0.400535	-1.98601	0.0470326	0.199047	535.433	498.73	268.011	198.328	300.957
742	ENSG00000183049	CAMK1D	144.503	-0.906927	0.457068	-1.98423	0.0472306	0.199616	228	181.94	123.531	82.5656	106.479
743	ENSG00000146376	ARHGAP18	166.901	0.863727	0.435673	1.98251	0.0474219	0.199886	114.736	170.168	92.4676	247.697	209.438
744	ENSG00000204574	ABCF1	1067.81	-0.543002	0.273818	-1.98308	0.0473589	0.199886	1209.14	1304.62	1149.34	819.697	856.231
745	ENSG00000160888	IER2	81.1543	1.14858	0.579572	1.98178	0.0475042	0.199964	29.4194	54.5821	78.7419	99.5894	143.438
746	ENSG00000070614	NDST1	442.905	-0.82545	0.417149	-1.97879	0.0478394	0.201105	761.963	575.788	272.346	315.792	288.637
747	ENSG00000123636	BAZ2B	217.725	-0.897613	0.453958	-1.97731	0.0480071	0.20154	394.22	253.646	154.594	125.125	161.038
748	ENSG00000164741	DLC1	199.375	-0.77943	0.394306	-1.97672	0.0480738	0.20155	186.813	270.77	260.065	148.107	131.119
749	ENSG00000175745	NR2F1	294.97	0.85765	0.435134	1.971	0.0487235	0.203729	117.678	216.188	332.305	417.084	391.596
750	ENSG00000197894	ADH5	81.1328	1.23812	0.628105	1.97119	0.0487018	0.203729	19.1226	51.3714	85.9659	125.125	124.079
751	ENSG00000167088	SNRPD1	126.129	0.856453	0.435352	1.96726	0.0491528	0.205251	95.6131	86.6892	103.304	179.601	165.438
752	ENSG00000085063	CD59	606.766	0.730905	0.372507	1.96212	0.0497483	0.207461	383.923	346.757	707.955	709.043	886.151
753	ENSG00000100241	SBF1	185.569	0.92551	0.472611	1.95829	0.0501958	0.209049	82.3744	110.234	215.276	237.482	282.477
754	ENSG00000049323	LTBP1	387.606	-0.667942	0.341664	-1.95497	0.0505871	0.209571	545.73	357.459	462.338	297.066	275.437
755	ENSG00000107863	ARHGAP21	546.348	-0.717638	0.367193	-1.95439	0.0506551	0.209571	884.053	647.493	413.214	382.185	404.796
756	ENSG00000120742	SERP1	510.437	-0.797407	0.407988	-1.95449	0.0506436	0.209571	886.995	637.861	320.747	339.625	366.956
757	ENSG00000134333	LDHA	147.772	0.851591	0.43565	1.95476	0.0506113	0.209571	147.097	95.2511	93.9124	194.923	207.678
758	ENSG00000212802	RPL15P3	136.463	-0.926187	0.473673	-1.95533	0.0505442	0.209571	222.117	176.589	106.916	83.4168	93.279
759	ENSG00000047249	ATP6V1H	110.329	-1.07062	0.548844	-1.95069	0.0510943	0.210554	213.291	135.92	70.0731	67.2441	65.1193
760	ENSG00000072415	PALS1	128.214	0.874201	0.447986	1.9514	0.0510095	0.210554	113.265	82.4083	93.19	149.81	202.398
761	ENSG00000150760	DOCK1	120.03	0.983758	0.50417	1.95124	0.0510284	0.210554	117.678	51.3714	90.3004	200.881	139.919
762	ENSG00000105887	MTPN	877.557	-0.607029	0.311693	-1.94753	0.0514717	0.211	1306.22	879.735	866.883	650.31	684.633
763	ENSG00000116497	S100PBP	103.849	-0.994791	0.510517	-1.9486	0.0513436	0.211	111.794	179.8	97.5244	55.3275	74.7992
764	ENSG00000159346	ADIPOR1	85.6306	-1.0798	0.554447	-1.94753	0.0514708	0.211	110.323	138.061	77.2971	66.3929	36.0796
765	ENSG00000186480	INSIG1	98.8613	-1.2213	0.626898	-1.94817	0.0513947	0.211	228	104.883	52.013	43.4108	65.9993
766	ENSG00000110047	EHD1	403.657	0.690226	0.354762	1.9456	0.0517024	0.211459	347.149	233.312	391.542	469.007	577.274
767	ENSG00000189241	TSPYL1	132.343	-0.842801	0.433212	-1.94547	0.0517184	0.211459	147.097	173.378	161.818	80.8632	98.559
768	ENSG00000101161	PRPF6	590.597	-0.592249	0.305011	-1.94173	0.0521696	0.213026	686.943	719.199	641.494	394.953	510.395
769	ENSG00000137831	UACA	836.203	0.595677	0.306965	1.94053	0.0523147	0.213341	588.388	833.715	660.276	1174.64	923.99
770	ENSG00000169871	TRIM56	177.577	0.931984	0.480811	1.93836	0.0525794	0.214142	63.2517	145.552	180.601	222.161	276.317
771	ENSG00000159674	SPON2	1688.26	-0.880068	0.454219	-1.93754	0.0526793	0.21427	1132.65	1216.86	3846.07	910.775	1334.95
772	ENSG00000185129	PURA	411.063	0.625717	0.323055	1.93688	0.0527603	0.214322	372.156	354.248	287.516	535.399	505.995
773	ENSG00000075945	KIFAP3	101.307	-1.09213	0.565654	-1.93075	0.0535143	0.216823	201.523	119.867	65.0163	64.6906	55.4394
774	ENSG00000198258	UBL5	150.925	0.815358	0.422217	1.93114	0.0534662	0.216823	92.6711	118.796	135.089	215.351	192.718
775	ENSG00000123352	SPATS2	91.2082	-0.97337	0.504946	-1.92767	0.0538963	0.218089	101.497	130.569	108.36	68.0953	47.5195
776	ENSG00000077549	CAPZB	267.826	0.800862	0.415609	1.92696	0.0539844	0.218164	125.032	207.626	285.349	326.006	395.116
777	ENSG00000101361	NOP56	420.774	0.77352	0.401836	1.92496	0.0542338	0.218608	173.575	433.446	374.927	548.167	573.754
778	ENSG00000122545	SEPTIN7	430.537	0.597883	0.310564	1.92516	0.0542099	0.218608	342.736	352.108	376.372	547.316	534.154
779	ENSG00000120948	TARDBP	140.115	-0.883145	0.459407	-1.92236	0.0545605	0.219643	208.878	188.362	117.752	80.8632	104.719
780	ENSG00000166923	GREM1	794.289	0.752974	0.392331	1.91923	0.0549549	0.220947	394.22	476.255	997.638	1035.9	1067.43
781	ENSG00000042753	AP2S1	574.675	-0.583648	0.304259	-1.91826	0.0550781	0.221159	716.363	585.42	687.005	410.274	474.315
782	ENSG00000153250	RBMS1	579.791	0.651136	0.340426	1.91271	0.0557855	0.223713	379.51	420.603	614.765	846.084	637.993
783	ENSG00000211459	MT-RNR1	14762.2	0.6073	0.31797	1.90993	0.0561426	0.224857	10541	13079.4	12998.9	24659.9	12531.9
784	ENSG00000100664	EIF5	479.595	-0.822011	0.43095	-1.90744	0.0564638	0.225855	853.163	619.667	269.456	335.369	320.317
785	ENSG00000130635	COL5A1	471.221	-0.711261	0.373025	-1.90674	0.0565546	0.22593	750.195	572.577	352.533	347.286	333.516
786	ENSG00000054116	TRAPPC3	222.476	-0.868949	0.456411	-1.90387	0.0569266	0.227127	344.207	325.352	145.925	120.018	176.878
787	ENSG00000177706	FAM20C	104.949	-0.955102	0.502351	-1.90126	0.0572674	0.228196	92.6711	130.569	166.875	78.3096	56.3194
788	ENSG00000144713	RPL32	1754.25	0.594215	0.312942	1.8988	0.057591	0.229195	1079.69	1349.57	1940.37	2213.1	2188.54
789	ENSG00000022277	RTF2	223.722	1.09341	0.576257	1.89743	0.0577707	0.22946	41.1872	132.709	286.072	326.006	332.636
790	ENSG00000082701	GSK3B	344.133	-0.784927	0.413784	-1.89695	0.0578347	0.22946	575.149	436.657	229.724	247.697	231.438
791	ENSG00000149218	ENDOD1	250.708	-0.799833	0.421714	-1.89663	0.0578772	0.22946	389.807	340.335	176.989	165.131	181.278
792	ENSG00000171206	TRIM8	194.968	-0.75386	0.397779	-1.89517	0.0580697	0.229684	266.246	251.506	181.323	146.405	129.359
793	ENSG00000197982	C1orf122	83.9616	1.0013	0.528364	1.89509	0.0580801	0.229684	77.9614	57.7928	44.789	132.786	106.479
794	ENSG00000091164	TXNL1	213.847	-0.894127	0.47243	-1.89261	0.0584092	0.229964	432.465	186.221	169.042	132.786	148.718
795	ENSG00000110237	ARHGEF17	108.067	-0.939375	0.496499	-1.892	0.0584913	0.229964	151.51	159.465	90.3004	77.4584	61.5994
796	ENSG00000177606	JUN	645.941	-0.714456	0.377628	-1.89196	0.0584964	0.229964	909.06	962.143	426.218	457.09	475.195
797	ENSG00000185236	RAB11B	106.282	-0.970899	0.513285	-1.89154	0.058552	0.229964	180.929	113.445	102.581	83.4168	51.0395
798	ENSG00000187498	COL4A1	181.218	0.745996	0.394446	1.89125	0.0585911	0.229964	157.394	118.796	151.705	249.399	228.798
799	ENSG00000228929	RPS13P2	453.363	-0.598155	0.316115	-1.89221	0.0584637	0.229964	478.065	601.473	494.124	346.435	346.716
800	ENSG00000163565	IFI16	218.9	0.718588	0.380106	1.8905	0.0586917	0.230071	148.568	161.606	210.942	297.066	276.317
801	ENSG00000141582	CBX4	125.861	-0.951133	0.50356	-1.88882	0.0589165	0.230664	228	146.622	93.9124	85.9703	74.7992
802	ENSG00000042493	CAPG	264.505	-0.772729	0.409468	-1.88715	0.0591398	0.23125	448.646	291.104	212.386	184.709	185.678
803	ENSG00000169379	ARL13B	125.94	-0.965095	0.511787	-1.88574	0.0593307	0.231419	226.529	105.953	137.257	57.881	102.079
804	ENSG00000212907	MT-ND4L	815.95	0.63343	0.335906	1.88574	0.0593305	0.231419	619.279	728.831	657.387	1349.14	725.112
805	ENSG00000107175	CREB3	117.811	0.932647	0.495092	1.88379	0.0595939	0.232157	63.2517	68.4952	126.421	155.768	175.118
806	ENSG00000153046	CDYL	80.9937	-0.991572	0.527585	-1.87945	0.0601827	0.23416	111.794	102.743	88.8556	40.8572	60.7194
807	ENSG00000185104	FAF1	156.292	-0.979909	0.521631	-1.87855	0.0603064	0.23435	247.123	253.646	83.7987	110.655	86.2391
808	ENSG00000148154	UGCG	179.885	0.763384	0.406709	1.87698	0.0605208	0.234892	114.736	177.659	129.31	237.482	240.237
809	ENSG00000182247	UBE2E2	105.272	-0.977591	0.521865	-1.87327	0.0610317	0.236583	161.807	153.044	78.7419	55.3275	77.4392
810	ENSG00000174574	AKIRIN1	181.296	0.77751	0.415495	1.87129	0.0613053	0.23735	102.968	139.131	179.878	245.143	239.357
811	ENSG00000148925	BTBD10	132.345	-0.840339	0.44958	-1.86916	0.0615999	0.238196	167.691	192.643	122.086	84.268	95.039
812	ENSG00000138326	RPS24	1444.27	0.576005	0.308267	1.86852	0.0616893	0.238248	872.286	1282.14	1465.76	1683.66	1917.5
813	ENSG00000141646	SMAD4	99.7536	-0.998906	0.535124	-1.86668	0.061946	0.238672	155.923	147.693	70.7955	69.7977	54.5594
814	ENSG00000244405	ETV5	110.276	-0.963424	0.516126	-1.86665	0.0619512	0.238672	170.633	162.676	78.0195	74.0537	65.9993
815	ENSG00000125351	UPF3B	116.554	-0.856862	0.459392	-1.86521	0.0621521	0.239152	122.091	151.974	151.705	67.2441	89.7591
816	ENSG00000145425	RPS3A	84.2692	0.997927	0.535297	1.86425	0.0622867	0.239376	79.4324	41.7392	59.9594	104.697	135.519
817	ENSG00000116962	NID1	166.628	1.08685	0.58337	1.86306	0.0624533	0.239723	27.9484	153.044	162.541	250.25	239.357
818	ENSG00000100650	SRSF5	237.123	-0.684735	0.367795	-1.86173	0.0626413	0.240079	295.665	307.158	235.503	165.131	182.158
819	ENSG00000112851	ERBIN	412.098	0.583449	0.31346	1.86132	0.0626991	0.240079	336.852	347.827	346.031	540.507	489.275
820	ENSG00000173786	CNP	140.366	-0.787258	0.423293	-1.85984	0.0629079	0.240584	183.871	170.168	152.427	103.845	91.519
821	ENSG00000011198	ABHD5	108.978	1.03482	0.556698	1.85886	0.0630475	0.240824	101.497	32.1071	96.802	146.405	168.078
822	ENSG00000131871	SELENOS	239.776	0.760045	0.409945	1.85402	0.0637366	0.242865	117.678	210.837	233.336	288.554	348.476
823	ENSG00000150938	CRIM1	254.96	0.697211	0.375996	1.85431	0.0636955	0.242865	225.058	151.974	235.503	348.989	313.277
824	ENSG00000170961	HAS2	135.476	0.862669	0.465686	1.85247	0.0639583	0.243119	63.2517	117.726	124.253	184.709	187.438
825	ENSG00000173517	PEAK1	162.989	-0.77652	0.419146	-1.85262	0.0639366	0.243119	204.465	175.519	206.607	91.0775	137.279
826	ENSG00000107021	TBC1D13	84.1983	-1.11199	0.601096	-1.84994	0.0643217	0.244204	48.542	112.375	160.373	44.262	55.4394
827	ENSG00000089597	GANAB	128.175	0.80557	0.43595	1.84785	0.0646239	0.244759	100.026	110.234	85.9659	165.131	179.518
828	ENSG00000132669	RIN2	145.62	0.851991	0.460994	1.84816	0.0645789	0.244759	70.6066	150.903	108.36	194.072	204.158
829	ENSG00000103769	RAB11A	220.846	-0.789787	0.42804	-1.84513	0.0650192	0.245663	348.62	287.894	161.096	144.703	161.918
830	ENSG00000177707	NECTIN3	299.726	-0.665642	0.360665	-1.84559	0.0649511	0.245663	307.433	408.831	338.807	258.762	184.798
831	ENSG00000095787	WAC	551.998	-0.607563	0.331608	-1.83217	0.0669256	0.252562	819.331	592.911	508.572	400.06	439.115
832	ENSG00000072364	AFF4	220.933	0.698101	0.381435	1.8302	0.0672205	0.253125	157.394	217.258	156.039	305.578	268.397
833	ENSG00000145907	G3BP1	228.755	-0.714873	0.390621	-1.83009	0.0672363	0.253125	319.201	297.526	197.216	160.875	168.958
834	ENSG00000006576	PHTF2	156.923	-0.782569	0.428292	-1.82718	0.067672	0.253877	205.936	157.325	202.273	131.084	87.9991
835	ENSG00000125944	HNRNPR	638.383	-0.541424	0.296411	-1.8266	0.06776	0.253877	751.666	652.845	784.53	477.518	525.354
836	ENSG00000153976	HS3ST3A1	139.464	-0.819083	0.44804	-1.82815	0.0675273	0.253877	158.865	131.639	215.276	86.8215	104.719
837	ENSG00000167881	SRP68	90.056	-1.06357	0.582113	-1.82708	0.0676871	0.253877	142.684	143.412	55.625	42.5596	65.9993
838	ENSG00000115306	SPTBN1	863.683	-0.533984	0.29307	-1.82204	0.0684492	0.256154	1162.07	921.474	874.107	667.334	693.433
839	ENSG00000172638	EFEMP2	109.132	0.910387	0.499952	1.82095	0.0686149	0.256468	79.4324	52.4416	109.805	144.703	159.278
840	ENSG00000102898	NUTF2	361.908	-0.74493	0.409489	-1.81917	0.0688857	0.257121	639.872	397.058	258.62	257.911	256.077
841	ENSG00000130414	NDUFA10	84.5545	1.14678	0.63073	1.81819	0.0690357	0.257121	52.9549	22.475	94.6348	99.5894	153.118
842	ENSG00000183520	UTP11	90.1705	0.896864	0.49324	1.81831	0.0690167	0.257121	57.3679	74.9166	68.6283	129.381	120.559
843	ENSG00000103888	CEMIP	108.945	0.929282	0.511833	1.8156	0.069432	0.257984	44.1291	95.2511	99.6916	147.256	158.398
844	ENSG00000164171	ITGA2	545.921	0.844907	0.465237	1.81608	0.0693582	0.257984	216.233	269.7	754.189	816.293	673.193
845	ENSG00000167378	IRGQ	138.863	-0.842398	0.465052	-1.81141	0.070078	0.260077	154.452	231.171	120.641	85.9703	102.079
846	ENSG00000141429	GALNT1	294.519	-0.621727	0.343939	-1.80767	0.0706579	0.261919	386.865	331.773	309.188	223.012	221.758
847	ENSG00000139083	ETV6	88.542	-0.945913	0.524179	-1.80456	0.0711435	0.263407	82.3744	140.201	106.193	65.5418	48.3995
848	ENSG00000124831	LRRFIP1	1313.37	0.68666	0.380932	1.80258	0.0714549	0.264248	669.292	834.785	1661.53	1479.37	1921.9
849	ENSG00000185896	LAMP1	282.915	0.622229	0.345374	1.80161	0.0716072	0.2645	226.529	211.907	259.343	349.84	366.956
850	ENSG00000189067	LITAF	210.77	0.700396	0.389269	1.79926	0.0719773	0.265554	201.523	172.308	132.922	293.661	253.437
851	ENSG00000130816	DNMT1	296.13	0.651402	0.362257	1.79818	0.0721493	0.265876	201.523	215.118	305.576	367.715	390.716
852	ENSG00000152377	SPOCK1	119.588	0.818937	0.456103	1.79551	0.0725723	0.26712	104.439	92.0404	78.7419	137.042	185.678
853	ENSG00000159335	PTMS	1352.89	-0.488552	0.272294	-1.79421	0.0727804	0.267573	1368	1677.06	1540.16	1108.25	1070.95
854	ENSG00000118816	CCNI	369.191	0.773221	0.431087	1.79366	0.0728682	0.267582	182.4	225.82	452.947	595.834	388.956
855	ENSG00000162191	UBXN1	436.107	-0.608105	0.339365	-1.79189	0.0731509	0.268305	639.872	471.975	405.99	336.221	326.477
856	ENSG00000165410	CFL2	280.577	-0.723213	0.404336	-1.78864	0.0736724	0.269903	329.497	448.429	221.778	229.822	173.358
857	ENSG00000134684	YARS1	119.699	0.894751	0.502004	1.78236	0.074691	0.273005	64.7227	66.3547	135.089	165.131	167.198
858	ENSG00000146416	AIG1	100.321	-0.928457	0.520919	-1.78234	0.0746933	0.273005	138.271	158.395	75.1299	64.6906	65.1193
859	ENSG00000137801	THBS1	1719.96	0.485194	0.272349	1.78152	0.074828	0.273013	1590.12	1300.34	1558.22	2230.12	1921.02
860	ENSG00000153922	CHD1	164.316	-0.733594	0.411839	-1.78126	0.0748696	0.273013	188.284	200.134	197.938	96.1846	139.039
861	ENSG00000124486	USP9X	287.133	-0.684354	0.384878	-1.77811	0.0753865	0.274579	457.472	249.365	308.466	216.203	204.158
862	ENSG00000065534	MYLK	505.857	0.576402	0.324421	1.77671	0.0756158	0.275094	351.562	401.339	514.351	672.441	589.594
863	ENSG00000134352	IL6ST	251.997	0.663033	0.373598	1.77472	0.0759435	0.275794	217.704	155.184	239.838	324.304	322.957
864	ENSG00000136436	CALCOCO2	142.029	0.782884	0.441196	1.77446	0.0759875	0.275794	83.8453	108.094	137.979	205.988	174.238
865	ENSG00000148719	DNAJB12	168.158	-0.853842	0.481323	-1.77395	0.0760719	0.275794	280.955	218.328	115.584	137.042	88.8791
866	ENSG00000169567	HINT1	121.201	0.777397	0.439345	1.76945	0.0768195	0.278006	98.555	96.3213	88.1331	154.917	168.078
867	ENSG00000278311	GGNBP2	570.636	-0.530973	0.300119	-1.76921	0.0768594	0.278006	685.472	682.811	584.424	434.959	465.515
868	ENSG00000164830	OXR1	107.078	-0.848057	0.479712	-1.76785	0.0770867	0.278507	161.807	125.218	104.026	77.4584	66.8793
869	ENSG00000196531	NACA	318.748	0.740002	0.418784	1.76702	0.0772242	0.278682	148.568	237.593	366.258	362.608	478.715
870	ENSG00000100804	PSMB5	421.595	-0.605054	0.343199	-1.76299	0.0779029	0.280384	569.266	400.269	496.291	267.274	374.876
871	ENSG00000117625	RCOR3	85.3545	-0.937869	0.532054	-1.76273	0.077946	0.280384	141.213	98.4618	77.2971	57.881	51.9195
872	ENSG00000134690	CDCA8	90.5766	0.942609	0.534776	1.76262	0.0779638	0.280384	47.0711	58.863	91.7452	103.845	151.358
873	ENSG00000038427	VCAN	297.282	-0.613649	0.348385	-1.76141	0.0781692	0.2808	386.865	340.335	308.466	202.584	248.157
874	ENSG00000130340	SNX9	168.263	1.0306	0.585658	1.75972	0.0784548	0.281321	44.1291	77.0571	233.336	255.357	231.438
875	ENSG00000141753	IGFBP4	639.386	0.754373	0.428744	1.7595	0.0784935	0.281321	279.484	367.091	856.047	848.638	845.671
876	ENSG00000117298	ECE1	474.821	0.723883	0.411656	1.75847	0.0786677	0.281623	219.175	315.72	593.093	596.685	649.433
877	ENSG00000171940	ZNF217	93.8281	-1.04927	0.597339	-1.75657	0.0789917	0.282461	202.994	66.3547	85.9659	68.9465	44.8795
878	ENSG00000068489	PRR11	474.327	0.683287	0.389267	1.75532	0.079205	0.282613	273.601	292.175	577.922	561.786	666.153
879	ENSG00000165732	DDX21	967.452	0.494538	0.281746	1.75526	0.0792146	0.282613	819.331	767.36	907.338	1253.81	1089.43
880	ENSG00000106609	TMEM248	122.727	-0.839465	0.478855	-1.75307	0.0795905	0.283356	179.458	171.238	96.802	83.4168	82.7191
881	ENSG00000131626	PPFIA1	499.243	-0.619351	0.353311	-1.75299	0.0796036	0.283356	732.543	611.105	398.044	405.167	349.356
882	ENSG00000065427	KARS1	170.947	0.791124	0.45151	1.75217	0.0797438	0.283534	76.4905	150.903	168.32	217.905	241.117
883	ENSG00000134982	APC	268.259	-0.814538	0.465301	-1.75056	0.0800211	0.284197	433.936	392.777	146.648	205.137	162.798
884	ENSG00000140262	TCF12	120.335	-1.00597	0.575154	-1.74905	0.0802821	0.284802	220.646	170.168	61.4042	56.1786	93.279
885	ENSG00000122565	CBX3	352.531	0.598554	0.342342	1.74841	0.0803929	0.284872	272.13	357.459	247.784	441.768	443.515
886	ENSG00000077942	FBLN1	329.353	0.632536	0.362167	1.74653	0.0807185	0.284896	272.13	338.195	200.106	406.018	430.315
887	ENSG00000117751	PPP1R8	148.031	-0.863794	0.494578	-1.74653	0.0807194	0.284896	269.188	166.957	106.193	83.4168	114.399
888	ENSG00000164610	RP9	114.938	-1.01761	0.582418	-1.74722	0.0805994	0.284896	261.833	93.1106	78.0195	76.6072	65.1193
889	ENSG00000187240	DYNC2H1	167.834	-0.749223	0.42904	-1.74628	0.0807628	0.284896	223.588	217.258	160.373	145.554	92.399
890	ENSG00000133789	SWAP70	192.03	0.726781	0.416593	1.74458	0.0810574	0.285613	104.439	187.291	163.985	228.119	276.317
891	ENSG00000063177	RPL18	2228.02	-0.656324	0.377393	-1.7391	0.0820175	0.288026	3637.71	2838.27	1353.78	1410.42	1899.9
892	ENSG00000128228	SDF2L1	150.854	-0.716697	0.41204	-1.73939	0.0819664	0.288026	172.104	176.589	187.825	118.316	99.439
893	ENSG00000198743	SLC5A3	88.953	-0.928562	0.533846	-1.73938	0.0819678	0.288026	83.8453	92.0404	153.149	64.6906	51.0395
894	ENSG00000135404	CD63	1754.37	0.511292	0.294181	1.73802	0.0822076	0.28837	1691.62	1679.2	1128.39	2046.26	2226.38
895	ENSG00000196655	TRAPPC4	89.6508	-0.882667	0.508528	-1.73573	0.0826117	0.289464	122.091	117.726	89.578	50.2203	68.6393
896	ENSG00000235698	PA2G4P2	160.529	-0.941901	0.543378	-1.73342	0.0830216	0.290576	328.026	188.362	80.1867	99.5894	106.479
897	ENSG00000067798	NAV3	362.881	0.698145	0.403021	1.73228	0.0832241	0.29096	183.871	252.576	433.442	459.643	484.875
898	ENSG00000130766	SESN2	96.5085	0.887299	0.513138	1.72916	0.08378	0.291927	47.0711	72.7761	95.3572	135.339	131.999
899	ENSG00000137818	RPLP1	2325.71	0.496067	0.286715	1.73018	0.0835985	0.291927	2168.21	2279.6	1546.66	2642.1	2991.97
900	ENSG00000198786	MT-ND5	4522.55	0.487647	0.282005	1.72922	0.0837703	0.291927	3522.97	4493.93	3670.53	6417.13	4508.19
901	ENSG00000102359	SRPX2	112.086	-0.839539	0.485966	-1.72757	0.0840657	0.292084	170.633	141.271	96.802	67.2441	84.4791
902	ENSG00000117152	RGS4	239.552	0.834248	0.483021	1.72715	0.0841413	0.292084	75.0195	201.205	269.456	337.923	314.157
903	ENSG00000141349	G6PC3	127.18	-0.908554	0.526318	-1.72624	0.0843034	0.292084	219.175	175.519	75.1299	85.1192	80.9591
904	ENSG00000144426	NBEAL1	132.139	-0.740738	0.428855	-1.72725	0.0841231	0.292084	158.865	153.044	160.373	101.292	87.1191
905	ENSG00000146112	PPP1R18	271.233	0.725879	0.420489	1.72627	0.0842984	0.292084	136.8	187.291	319.302	338.774	373.996
906	ENSG00000164924	YWHAZ	966.417	-0.517195	0.299684	-1.7258	0.0843839	0.292084	1226.79	1186.89	883.499	696.275	838.631
907	ENSG00000172667	ZMAT3	344.284	-0.609718	0.353694	-1.72386	0.0847336	0.292971	510.427	357.459	330.861	261.316	261.357
908	ENSG00000008838	MED24	83.4114	-1.03126	0.600431	-1.71754	0.0858805	0.296609	94.1421	52.4416	167.597	54.4763	48.3995
909	ENSG00000170558	CDH2	512.594	-0.518414	0.302221	-1.71535	0.0862817	0.297667	558.969	602.543	587.314	385.59	428.555
910	ENSG00000079308	TNS1	135.597	-0.922496	0.538045	-1.71453	0.0864312	0.297855	275.071	145.552	81.6315	85.9703	89.7591
911	ENSG00000163431	LMOD1	86.8073	-1.03566	0.60437	-1.71362	0.0865979	0.298102	123.562	157.325	46.9562	60.4346	45.7595
912	ENSG00000100596	SPTLC2	92.8549	0.871451	0.509476	1.71048	0.0871764	0.299764	50.013	69.5654	88.8556	137.042	118.799
913	ENSG00000108953	YWHAE	1013.71	-0.609975	0.356781	-1.70966	0.0873284	0.299874	1434.2	1405.22	689.172	703.084	836.871
914	ENSG00000137207	YIPF3	215.644	-0.998964	0.584436	-1.70928	0.0873996	0.299874	501.601	212.977	94.6348	85.9703	183.038
915	ENSG00000100201	DDX17	560.643	-0.669516	0.392226	-1.70697	0.0878283	0.300359	900.234	719.199	356.867	398.358	428.555
916	ENSG00000112419	PHACTR2	230.34	0.635677	0.372346	1.70722	0.0877808	0.300359	182.4	196.924	186.38	340.477	245.517
917	ENSG00000138688	KIAA1109	221.74	-0.742761	0.435038	-1.70735	0.0877575	0.300359	183.871	388.496	220.333	179.601	136.399
918	ENSG00000101160	CTSZ	243.55	-0.60613	0.355363	-1.70567	0.0880702	0.300859	266.246	287.894	292.573	191.518	179.518
919	ENSG00000138448	ITGAV	262.966	-0.70838	0.416139	-1.70227	0.0887053	0.302699	383.923	367.091	183.49	177.048	203.278
920	ENSG00000092820	EZR	270.956	0.595029	0.350245	1.69889	0.0893394	0.304531	245.652	212.977	216.721	309.834	369.596
921	ENSG00000181722	ZBTB20	278.355	-0.638747	0.376207	-1.69786	0.0895343	0.304864	425.11	290.034	260.065	198.328	218.238
922	ENSG00000198121	LPAR1	96.8785	0.82851	0.488956	1.69445	0.0901803	0.30673	75.0195	62.0737	84.5211	114.06	148.718
923	ENSG00000145431	PDGFC	211.91	-0.708392	0.418406	-1.69307	0.0904413	0.307285	185.342	267.559	299.075	116.613	190.958
924	ENSG00000108424	KPNB1	1117.48	-0.548989	0.324374	-1.69245	0.0905594	0.307353	1528.34	1442.68	868.328	820.549	927.51
925	ENSG00000185551	NR2F2	731.605	0.70464	0.417198	1.68898	0.0912231	0.309271	257.42	691.373	802.59	1023.13	883.511
926	ENSG00000153140	CETN3	245.783	-0.73389	0.435167	-1.68645	0.0917082	0.31058	317.73	393.847	166.153	154.066	197.118
927	ENSG00000172086	KRCC1	82.2444	0.985349	0.584552	1.68565	0.0918636	0.31077	32.3614	51.3714	92.4676	102.143	132.879
928	ENSG00000101457	DNTTIP1	92.6153	-0.915376	0.543884	-1.68304	0.0923682	0.311469	154.452	120.937	67.1835	53.6251	66.8793
929	ENSG00000109814	UGDH	94.6644	0.958664	0.569476	1.68342	0.0922948	0.311469	33.8323	62.0737	109.083	131.935	136.399
930	ENSG00000138675	FGF5	116.006	0.853258	0.506735	1.68383	0.0922137	0.311469	80.9034	128.428	54.1802	164.28	152.238
931	ENSG00000087086	FTL	3777.47	0.472346	0.28081	1.68208	0.0925526	0.311756	2644.81	3225.69	3939.99	4221.06	4855.79
932	ENSG00000105894	PTN	416.863	-0.647463	0.385614	-1.67904	0.0931436	0.312879	614.866	555.453	292.573	281.744	339.676
933	ENSG00000164190	NIPBL	621.256	-0.513856	0.30608	-1.67883	0.0931852	0.312879	836.982	657.126	624.156	500.501	487.515
934	ENSG00000167081	PBX3	177.009	-0.683787	0.407229	-1.67912	0.0931286	0.312879	233.884	225.82	166.153	142.149	117.039
935	ENSG00000018408	WWTR1	151.203	0.702272	0.418714	1.67721	0.0935016	0.313606	105.91	124.147	132.2	222.161	171.598
936	ENSG00000106080	FKBP14	197.348	0.799211	0.476961	1.67563	0.0938101	0.313968	70.6066	168.027	216.721	263.869	267.517
937	ENSG00000118217	ATF6	113.664	0.92216	0.550313	1.6757	0.0937967	0.313968	38.2452	86.6892	124.976	186.411	131.999
938	ENSG00000134108	ARL8B	99.7323	0.793778	0.474083	1.67435	0.0940627	0.314478	73.5485	87.7594	70.0731	137.042	130.239
939	ENSG00000008018	PSMB1	105.205	0.933128	0.558344	1.67124	0.0946742	0.314676	47.0711	54.5821	128.588	126.828	168.958
940	ENSG00000105193	RPS16	693.791	0.48841	0.292031	1.67246	0.0944343	0.314676	542.788	663.547	585.869	821.4	855.351
941	ENSG00000106105	GARS1	537.017	0.712179	0.425977	1.67187	0.0945498	0.314676	263.304	296.456	721.68	700.531	703.113
942	ENSG00000167770	OTUB1	292.988	-0.629102	0.376084	-1.67277	0.0943723	0.314676	391.278	389.566	243.45	240.887	199.758
943	ENSG00000181163	NPM1	761.129	0.491139	0.293921	1.67099	0.0947239	0.314676	553.085	704.216	706.51	909.924	931.91
944	ENSG00000213853	EMP2	222.748	-0.639506	0.382158	-1.67341	0.0942466	0.314676	276.542	298.596	205.162	158.322	175.118
945	ENSG00000106400	ZNHIT1	94.1017	0.911183	0.545951	1.66898	0.0951208	0.31566	42.6581	58.863	106.193	139.595	123.199
946	ENSG00000168439	STIP1	241.524	-0.641625	0.384617	-1.66822	0.0952726	0.31583	229.471	338.195	278.125	151.512	210.318
947	ENSG00000125818	PSMF1	103.216	-0.807629	0.484535	-1.66681	0.0955515	0.31642	123.562	147.693	102.581	61.2858	80.9591
948	ENSG00000106636	YKT6	126.755	0.929939	0.558458	1.66519	0.0958747	0.317155	35.3033	99.532	143.036	196.625	159.278
949	ENSG00000168264	IRF2BP2	108.703	-0.827133	0.497075	-1.664	0.0961126	0.317607	175.045	131.639	88.8556	74.0537	73.9192
950	ENSG00000048405	ZNF800	138.697	-0.750999	0.451839	-1.6621	0.0964934	0.31795	155.923	125.218	215.276	105.548	91.519
951	ENSG00000117614	SYF2	254.796	-0.660941	0.397713	-1.66185	0.0965419	0.31795	407.459	240.803	248.507	165.131	212.078
952	ENSG00000127314	RAP1B	327.899	-0.685667	0.412479	-1.66231	0.0964509	0.31795	532.491	401.339	226.112	209.393	270.157
953	ENSG00000176771	NCKAP5	85.0079	0.883124	0.531536	1.66146	0.0966219	0.31795	69.1356	49.2309	72.2403	145.554	88.8791
954	ENSG00000248527	MTATP6P1	182.027	0.687513	0.413929	1.66094	0.0967247	0.317955	169.162	138.061	132.2	288.554	182.158
955	ENSG00000114999	TTL	171.697	0.656106	0.396223	1.6559	0.0977418	0.320636	136.8	126.288	155.317	231.524	208.558
956	ENSG00000125868	DSTN	1115.29	-0.452147	0.273138	-1.65538	0.0978473	0.320636	1300.34	1294.99	1154.4	939.715	887.031
957	ENSG00000183741	CBX6	282.966	0.589419	0.356032	1.65552	0.0978184	0.320636	216.233	205.486	283.904	366.012	343.196
958	ENSG00000165119	HNRNPK	1186.12	-0.618236	0.373846	-1.65372	0.0981842	0.321405	1734.27	1683.48	718.068	896.305	898.471
959	ENSG00000142534	RPS11	1558.44	-0.551655	0.333698	-1.65316	0.0982992	0.321446	2388.86	1809.77	1158.73	1172.94	1261.91
960	ENSG00000174099	MSRB3	407.57	0.649618	0.393098	1.65256	0.0984203	0.321506	191.226	412.041	391.542	590.727	452.315
961	ENSG00000090889	KIF4A	79.3721	1.06244	0.643123	1.65201	0.0985333	0.321541	52.9549	23.5452	88.8556	154.066	77.4392
962	ENSG00000008294	SPAG9	263.968	0.660681	0.401589	1.64517	0.0999358	0.32544	151.51	200.134	289.684	388.995	289.517
963	ENSG00000118260	CREB1	92.1287	-0.936494	0.569233	-1.64519	0.0999313	0.32544	151.51	63.144	127.143	76.6072	42.2396
964	ENSG00000119705	SLIRP	193.639	0.710562	0.432698	1.64217	0.100556	0.327119	130.916	118.796	212.386	205.137	300.957
965	ENSG00000060138	YBX3	343.744	0.705811	0.430475	1.63961	0.101086	0.327284	141.213	286.824	393.71	512.417	384.556
966	ENSG00000067900	ROCK1	769.312	0.470927	0.287254	1.63941	0.101128	0.327284	601.627	697.795	699.286	966.102	881.751
967	ENSG00000151835	SACS	162.889	0.778685	0.474504	1.64105	0.100787	0.327284	66.1937	141.271	171.209	228.971	206.798
968	ENSG00000166949	SMAD3	292.34	-0.702382	0.428335	-1.6398	0.101047	0.327284	405.988	449.5	182.046	207.691	216.478
969	ENSG00000178951	ZBTB7A	357.661	0.711313	0.433562	1.64063	0.100875	0.327284	154.452	247.225	451.502	451.132	483.995
970	ENSG00000090905	TNRC6A	407.871	-0.588302	0.359676	-1.63564	0.101914	0.328301	535.433	550.102	327.971	280.893	344.956
971	ENSG00000106462	EZH2	110.464	-0.786593	0.480663	-1.63648	0.10174	0.328301	155.923	140.201	102.581	89.3751	64.2393
972	ENSG00000119596	YLPM1	564.279	-0.546063	0.334114	-1.63436	0.102183	0.328301	703.124	757.728	476.786	486.882	396.876
973	ENSG00000129493	HEATR5A	116.091	-0.800351	0.489841	-1.6339	0.10228	0.328301	161.807	168.027	90.3004	73.2025	87.1191
974	ENSG00000131711	MAP1B	2898.52	0.459902	0.281445	1.63407	0.102243	0.328301	1999.05	2549.3	3010.25	3521.38	3412.6
975	ENSG00000147955	SIGMAR1	114.45	0.763229	0.466694	1.63539	0.101967	0.328301	66.1937	102.743	98.9692	160.024	144.318
976	ENSG00000188846	RPL14	293.033	0.590869	0.361547	1.63428	0.1022	0.328301	263.304	185.151	282.46	354.096	380.156
977	ENSG00000196141	SPATS2L	327.067	0.600019	0.366998	1.63494	0.102062	0.328301	189.755	322.141	300.52	438.364	384.556
978	ENSG00000073712	FERMT2	195.669	0.720579	0.441311	1.63281	0.102508	0.328693	129.445	105.953	229.724	254.506	258.717
979	ENSG00000114062	UBE3A	236.149	0.612485	0.375223	1.63232	0.102612	0.328693	191.226	178.73	214.554	349.84	246.397
980	ENSG00000213064	SFT2D2	86.5431	0.908375	0.556806	1.6314	0.102805	0.328977	44.1291	48.1607	98.9692	120.018	121.439
981	ENSG00000092199	HNRNPC	310.803	0.58715	0.360359	1.62935	0.103239	0.330028	226.529	331.773	218.166	400.911	376.636
982	ENSG00000143033	MTF2	162.067	-0.890399	0.546853	-1.62822	0.103477	0.330453	354.504	151.974	90.3004	112.357	101.199
983	ENSG00000129559	NEDD8	641.656	-0.609638	0.374784	-1.62664	0.103814	0.330517	970.841	827.293	435.609	430.703	543.834
984	ENSG00000143319	ISG20L2	102.276	1.11825	0.687066	1.62757	0.103617	0.330517	38.2452	21.4047	148.093	154.917	148.718
985	ENSG00000232573	RPL3P4	524.488	-0.546362	0.335831	-1.6269	0.103759	0.330517	694.298	651.774	455.114	357.5	463.755
986	ENSG00000127616	SMARCA4	788.904	-0.493773	0.303804	-1.6253	0.104098	0.331088	981.137	714.918	981.023	590.727	676.713
987	ENSG00000067082	KLF6	443.795	0.559256	0.344355	1.62407	0.104361	0.331588	279.484	384.215	454.391	493.691	607.194
988	ENSG00000163161	ERCC3	128.186	-1.00448	0.618952	-1.62287	0.104616	0.332062	304.491	123.077	54.1802	80.8632	78.3192
989	ENSG00000111371	SLC38A1	181.561	0.726552	0.447942	1.62198	0.104808	0.332334	82.3744	189.432	158.929	230.673	246.397
990	ENSG00000013588	GPRC5A	104.354	-0.761856	0.471549	-1.61565	0.106171	0.334111	141.213	127.358	106.193	76.6072	70.3993
991	ENSG00000106348	IMPDH1	93.7683	-0.936241	0.579363	-1.61598	0.106098	0.334111	177.987	105.953	64.2939	76.6072	43.9995
992	ENSG00000117226	GBP3	83.1283	1.10833	0.686095	1.61542	0.106221	0.334111	11.7678	83.4785	74.4075	142.149	103.839
993	ENSG00000139437	TCHP	137.202	0.737417	0.456158	1.61658	0.105969	0.334111	83.8453	147.693	93.19	167.685	193.598
994	ENSG00000148484	RSU1	173.221	0.704388	0.435275	1.61826	0.105607	0.334111	108.852	112.375	192.882	243.441	208.558
995	ENSG00000160539	PLPP7	148.49	-1.01037	0.624403	-1.61815	0.105631	0.334111	295.665	219.399	43.3442	100.441	83.5991
996	ENSG00000168724	DNAJC21	291.436	0.611823	0.378424	1.61677	0.105929	0.334111	175.045	229.031	316.412	360.054	376.636
997	ENSG00000232174	0	110.979	-1.04512	0.646389	-1.61687	0.105907	0.334111	225.058	159.465	35.3977	68.0953	66.8793
998	ENSG00000134697	GNL2	197.744	0.72038	0.446652	1.61284	0.106778	0.335528	108.852	128.428	232.614	297.066	221.758
999	ENSG00000079819	EPB41L2	184.254	0.665286	0.41277	1.61176	0.107014	0.335932	105.91	183.011	158.206	239.185	234.958
1000	ENSG00000123908	AGO2	102.555	0.782947	0.486119	1.61061	0.107265	0.336048	67.6646	85.619	85.2435	165.131	109.119
1001	ENSG00000134369	NAV1	899.637	-0.486837	0.302212	-1.61091	0.107199	0.336048	1207.67	966.424	874.83	808.632	640.633
1002	ENSG00000145220	LYAR	211.162	0.619521	0.384874	1.60967	0.10747	0.336353	205.936	143.412	172.654	244.292	289.517
1003	ENSG00000214253	FIS1	113.442	-0.763677	0.474724	-1.60868	0.107687	0.336697	150.039	149.833	107.638	65.5418	94.159
1004	ENSG00000008282	SYPL1	108.887	-0.93912	0.584478	-1.60677	0.108106	0.337333	150.039	202.275	52.013	72.3513	67.7593
1005	ENSG00000148773	MKI67	395.025	0.506578	0.315272	1.60679	0.1081	0.337333	326.555	348.897	338.807	470.709	490.155
1006	ENSG00000110696	C11orf58	359.618	0.665103	0.414243	1.60559	0.108365	0.337805	276.542	179.8	416.826	362.608	562.314
1007	ENSG00000100418	DESI1	124.14	-0.824074	0.513847	-1.60374	0.108772	0.337888	229.471	125.218	96.802	70.6489	98.559
1008	ENSG00000115762	PLEKHB2	233.072	0.593089	0.369606	1.60465	0.10857	0.337888	192.697	180.87	207.33	333.667	250.797
1009	ENSG00000134779	TPGS2	98.9271	0.824624	0.514262	1.60351	0.108822	0.337888	55.8969	63.144	106.916	121.72	146.958
1010	ENSG00000143164	DCAF6	167.61	-0.736736	0.459302	-1.60403	0.108706	0.337888	122.091	282.543	193.604	116.613	123.199
1011	ENSG00000115053	NCL	2823.68	0.510974	0.319211	1.60074	0.109434	0.339452	1656.31	2355.59	3226.25	3210.69	3669.56
1012	ENSG00000169925	BRD3	142.211	-0.740575	0.463021	-1.59944	0.109723	0.340011	201.523	108.094	198.661	92.7799	109.999
1013	ENSG00000102054	RBBP7	101.825	0.755928	0.473785	1.59551	0.110598	0.342385	82.3744	67.4249	89.578	142.149	127.599
1014	ENSG00000142230	SAE1	106.027	0.765679	0.480337	1.59404	0.110926	0.343061	70.6066	81.338	96.0796	114.911	167.198
1015	ENSG00000151491	EPS8	181.535	-0.617654	0.388125	-1.59138	0.111524	0.344394	220.646	199.064	213.109	147.256	127.599
1016	ENSG00000157259	GATAD1	214.883	0.697668	0.438469	1.59115	0.111577	0.344394	101.497	166.957	246.339	287.703	271.917
1017	ENSG00000089248	ERP29	325.355	-0.623666	0.392464	-1.58911	0.112036	0.344602	500.13	394.917	241.283	225.566	264.877
1018	ENSG00000100632	ERH	108.039	0.729369	0.458897	1.5894	0.111971	0.344602	91.2002	80.2678	85.2435	152.363	131.119
1019	ENSG00000108100	CCNY	163.404	-0.738548	0.46496	-1.58841	0.112193	0.344602	291.252	130.569	162.541	120.018	112.639
1020	ENSG00000143761	ARF1	447.299	-0.533169	0.335658	-1.58843	0.112189	0.344602	603.098	539.399	389.375	345.584	359.036
1021	ENSG00000233668	0	177.672	-0.842442	0.529974	-1.58959	0.111927	0.344602	338.323	224.75	85.2435	109.804	130.239
1022	ENSG00000116688	MFN2	113.872	0.782154	0.492617	1.58775	0.112342	0.344721	119.149	59.9333	86.6883	130.232	173.358
1023	ENSG00000114446	IFT57	92.3679	0.797424	0.502769	1.58606	0.112725	0.345557	75.0195	53.5119	85.2435	132.786	115.279
1024	ENSG00000125148	MT2A	6489.95	0.529714	0.334215	1.58495	0.112978	0.345784	3914.25	4554.93	8064.18	7205.34	8711.03
1025	ENSG00000234127	TRIM26	95.6942	-0.783795	0.494581	-1.58477	0.113019	0.345784	138.271	116.656	90.3004	67.2441	65.9993
1026	ENSG00000141469	SLC14A1	200.03	-0.601196	0.380232	-1.58113	0.113848	0.347304	202.994	238.663	252.841	147.256	158.398
1027	ENSG00000173546	CSPG4	145.263	0.672412	0.425052	1.58195	0.113661	0.347304	126.503	124.147	101.859	161.726	212.078
1028	ENSG00000257103	LSM14A	84.0273	-0.829237	0.524335	-1.5815	0.113763	0.347304	126.503	102.743	76.5747	54.4763	59.8394
1029	ENSG00000129515	SNX6	155.065	-0.80939	0.512779	-1.57844	0.114465	0.348518	238.297	236.522	87.4107	125.976	87.1191
1030	ENSG00000168374	ARF4	96.9452	0.75289	0.476989	1.57842	0.114468	0.348518	85.3163	71.7059	71.5179	126.828	129.359
1031	ENSG00000100300	TSPO	171.645	0.702261	0.446147	1.57406	0.115474	0.350575	186.813	114.515	111.25	171.09	274.557
1032	ENSG00000113013	HSPA9	383.725	0.655839	0.41646	1.5748	0.115303	0.350575	182.4	269.7	481.843	469.007	515.675
1033	ENSG00000167004	PDIA3	780.102	-0.447977	0.284604	-1.57403	0.11548	0.350575	912.002	904.35	804.034	657.971	622.153
1034	ENSG00000145592	RPL37	2445.63	-0.587991	0.373956	-1.57235	0.115868	0.35124	3745.09	3262.08	1465.03	1582.37	2173.58
1035	ENSG00000187173	LCE2A	101.325	0.915431	0.582291	1.57212	0.115923	0.35124	75.0195	114.515	35.3977	101.292	180.398
1036	ENSG00000204120	GIGYF2	476.014	-0.49884	0.31753	-1.571	0.116182	0.351395	533.962	621.808	461.615	371.971	390.716
1037	ENSG00000226961	PPIAP60	132.432	-0.86147	0.54838	-1.57093	0.116198	0.351395	211.82	202.275	70.7955	66.3929	110.879
1038	ENSG00000058668	ATP2B4	399.497	0.563731	0.359345	1.56877	0.116701	0.351928	311.846	248.295	445	476.667	515.675
1039	ENSG00000143183	TMCO1	487.706	-0.535721	0.3415	-1.56873	0.116711	0.351928	653.111	620.737	397.322	389.846	377.516
1040	ENSG00000170955	CAVIN3	425.726	-0.601993	0.383525	-1.56963	0.116501	0.351928	681.059	491.239	307.744	337.072	311.517
1041	ENSG00000115641	FHL2	197.721	-0.589479	0.376283	-1.56658	0.117212	0.352583	214.762	237.593	232.614	154.917	148.718
1042	ENSG00000188706	ZDHHC9	334.841	-0.579649	0.370054	-1.56639	0.117257	0.352583	463.356	422.744	272.346	231.524	284.237
1043	ENSG00000258289	CHURC1	118.197	0.776667	0.495843	1.56636	0.117265	0.352583	55.8969	128.428	91.0228	164.28	151.358
1044	ENSG00000111186	WNT5B	383.264	0.525346	0.335597	1.56541	0.117488	0.352913	264.775	346.757	365.536	433.257	505.995
1045	ENSG00000168214	RBPJ	726.585	-0.473676	0.302781	-1.56442	0.11772	0.353272	981.137	770.571	703.62	593.281	584.314
1046	ENSG00000164985	PSIP1	367.388	-0.600701	0.384448	-1.5625	0.118169	0.354282	567.795	430.235	278.848	248.548	311.517
1047	ENSG00000105640	RPL18A	454.393	-0.716507	0.459449	-1.55949	0.11888	0.356072	788.44	600.403	228.279	256.209	398.636
1048	ENSG00000072042	RDH11	231.01	-0.698715	0.448965	-1.55628	0.119641	0.357329	191.226	219.399	407.435	209.393	127.599
1049	ENSG00000102910	LONP2	144.031	0.787295	0.505712	1.55681	0.119516	0.357329	73.5485	82.4083	177.711	228.971	157.518
1050	ENSG00000167325	RRM1	93.7787	0.749075	0.481283	1.55641	0.11961	0.357329	75.0195	71.7059	74.4075	115.762	131.999
1051	ENSG00000023287	RB1CC1	249.268	-0.567799	0.365972	-1.55148	0.120786	0.359803	253.007	314.65	291.851	218.756	168.078
1052	ENSG00000082898	XPO1	146.641	-0.674744	0.434935	-1.55137	0.120814	0.359803	219.175	160.536	137.979	106.399	109.119
1053	ENSG00000226419	SLC16A1-AS1	98.365	1.20871	0.779008	1.5516	0.120759	0.359803	5.88388	53.5119	132.922	120.869	178.638
1054	ENSG00000005339	CREBBP	258.491	-0.651552	0.420722	-1.54865	0.121465	0.3614	413.343	315.72	179.156	191.518	192.718
1055	ENSG00000105974	CAV1	966.529	0.448561	0.289952	1.54702	0.121858	0.362225	738.427	863.681	927.565	1273.38	1029.59
1056	ENSG00000088833	NSFL1C	91.6014	0.966512	0.626718	1.54218	0.12303	0.363007	88.2582	20.3345	90.3004	118.316	140.799
1057	ENSG00000092203	TOX4	103.631	0.718181	0.465538	1.54269	0.122905	0.363007	76.4905	86.6892	83.7987	125.976	145.198
1058	ENSG00000106211	HSPB1	1217.31	0.494106	0.319731	1.54538	0.122255	0.363007	759.021	1076.66	1301.77	1292.96	1656.14
1059	ENSG00000113140	SPARC	1697.74	-0.526387	0.341008	-1.54362	0.12268	0.363007	2421.22	2221.81	1160.9	1276.79	1407.99
1060	ENSG00000143870	PDIA6	458.996	0.524949	0.339855	1.54462	0.122437	0.363007	445.704	283.613	442.111	577.959	545.594
1061	ENSG00000187147	RNF220	165.913	-0.851817	0.551867	-1.54352	0.122705	0.363007	219.175	308.228	78.7419	80.8632	142.558
1062	ENSG00000197712	FAM114A1	713.679	-0.439862	0.28496	-1.5436	0.122686	0.363007	807.563	802.678	782.362	568.596	607.194
1063	ENSG00000242372	EIF6	309.358	0.612694	0.39731	1.54211	0.123047	0.363007	175.045	233.312	356.145	338.774	443.515
1064	ENSG00000068697	LAPTM4A	264.423	0.581399	0.377246	1.54117	0.123276	0.36334	176.516	287.894	197.216	323.453	337.036
1065	ENSG00000100083	GGA1	146.585	-0.718638	0.466567	-1.54027	0.123495	0.363643	226.529	185.151	110.528	118.316	92.399
1066	ENSG00000123485	HJURP	82.6873	0.780952	0.507642	1.53839	0.123953	0.364104	67.6646	55.6523	69.3507	107.25	113.519
1067	ENSG00000141526	SLC16A3	322.711	0.618998	0.402273	1.53875	0.123865	0.364104	204.465	194.783	396.599	410.274	407.436
1068	ENSG00000149948	HMGA2	512.143	0.516338	0.335677	1.5382	0.124	0.364104	328.026	434.516	546.859	599.239	652.073
1069	ENSG00000169504	CLIC4	88.3824	0.808137	0.525587	1.53759	0.124149	0.364202	52.9549	95.2511	55.625	115.762	122.319
1070	ENSG00000011405	PIK3C2A	186.539	-0.592028	0.385349	-1.53634	0.124454	0.364755	204.465	226.89	215.276	154.066	131.999
1071	ENSG00000101150	TPD52L2	104.623	0.716127	0.466895	1.53381	0.125077	0.366093	72.0776	89.8999	87.4107	128.53	145.198
1072	ENSG00000102401	ARMCX3	155.822	-0.668084	0.43565	-1.53354	0.125144	0.366093	129.445	206.556	212.386	125.125	105.599
1073	ENSG00000131467	PSME3	223.257	-0.732003	0.477541	-1.53286	0.125311	0.366239	425.11	234.382	137.979	174.494	144.318
1074	ENSG00000023734	STRAP	175.809	0.676981	0.441794	1.53234	0.125438	0.366268	100.026	122.007	202.273	214.5	240.237
1075	ENSG00000104447	TRPS1	177.405	-0.654381	0.427255	-1.53159	0.125623	0.366468	275.071	154.114	194.326	118.316	145.198
1076	ENSG00000153815	CMIP	206.24	-0.591606	0.386794	-1.52951	0.126138	0.367628	282.426	238.663	194.326	160.024	155.758
1077	ENSG00000186298	PPP1CC	109.618	-0.703431	0.460575	-1.52729	0.12669	0.368894	138.271	135.92	114.862	85.1192	73.9192
1078	ENSG00000106665	CLIP2	91.1267	-0.770971	0.506164	-1.52316	0.127718	0.371542	130.916	85.619	111.25	70.6489	57.1994
1079	ENSG00000100813	ACIN1	506.801	-0.536867	0.352612	-1.52255	0.127873	0.371648	791.382	505.152	440.666	377.929	418.876
1080	ENSG00000105472	CLEC11A	204.308	-0.58478	0.384271	-1.52179	0.128061	0.371852	242.71	269.7	195.049	158.322	155.758
1081	ENSG00000162704	ARPC5	201.588	0.625972	0.411778	1.52017	0.128469	0.37269	130.916	142.342	222.5	233.226	278.957
1082	ENSG00000135899	SP110	91.1724	0.788966	0.520818	1.51486	0.129808	0.375187	50.013	64.2142	96.802	124.274	120.559
1083	ENSG00000139168	ZCRB1	365.212	-0.520009	0.343111	-1.51557	0.129628	0.375187	411.872	477.326	357.589	331.114	248.157
1084	ENSG00000178913	TAF7	81.0035	0.943475	0.622683	1.51518	0.129728	0.375187	20.5936	70.6356	85.2435	111.506	117.039
1085	ENSG00000188186	LAMTOR4	84.4902	-0.885023	0.583887	-1.51575	0.129584	0.375187	123.562	54.5821	132.2	41.7084	70.3993
1086	ENSG00000226396	0	220.679	-0.62827	0.414881	-1.51434	0.12994	0.375222	308.904	296.456	166.153	152.363	179.518
1087	ENSG00000118181	RPS25	123.97	0.724277	0.478559	1.51345	0.130165	0.375526	83.8453	73.8464	136.534	181.304	144.318
1088	ENSG00000115295	CLIP4	82.8811	0.893986	0.592008	1.51009	0.13102	0.377645	29.4194	57.7928	96.802	108.953	121.439
1089	ENSG00000117362	APH1A	85.7762	0.799413	0.529944	1.50849	0.13143	0.37848	51.484	54.5821	91.7452	114.911	116.159
1090	ENSG00000048991	R3HDM1	104.535	-0.739876	0.491126	-1.50649	0.131942	0.378708	144.155	142.342	87.4107	76.6072	72.1592
1091	ENSG00000106624	AEBP1	126.944	0.752364	0.499508	1.50621	0.132013	0.378708	66.1937	79.1975	152.427	160.024	176.878
1092	ENSG00000143549	TPM3	1049.41	0.445703	0.295894	1.50629	0.131992	0.378708	972.312	723.48	1053.99	1226.57	1270.71
1093	ENSG00000156531	PHF6	125.726	-0.789089	0.523921	-1.50612	0.132035	0.378708	244.181	99.532	110.528	99.5894	74.7992
1094	ENSG00000156970	BUB1B	83.7339	-0.818077	0.543276	-1.50582	0.132113	0.378708	125.032	79.1975	99.6916	41.7084	73.0392
1095	ENSG00000096384	HSP90AB1	10075.2	-0.383345	0.25481	-1.50443	0.13247	0.379039	12020.8	11203.2	10113.6	7859.05	9179.18
1096	ENSG00000204569	PPP1R10	252.822	0.581165	0.386237	1.50469	0.132405	0.379039	191.226	162.676	278.125	304.727	327.357
1097	ENSG00000185900	POMK	149.78	0.778043	0.518058	1.50185	0.133137	0.380599	105.91	59.9333	182.768	159.173	241.117
1098	ENSG00000116641	DOCK7	122.528	-0.704826	0.469576	-1.50098	0.133359	0.380888	157.394	176.589	101.136	85.1192	92.399
1099	ENSG00000179431	FJX1	120.225	0.72885	0.485847	1.50016	0.133572	0.381149	61.7808	92.0404	130.755	163.429	153.118
1100	ENSG00000145216	FIP1L1	93.0546	0.838963	0.559576	1.49928	0.1338	0.381452	33.8323	81.338	96.0796	138.744	115.279
1101	ENSG00000157657	ZNF618	152.83	-0.652329	0.435277	-1.49865	0.133964	0.381572	222.117	175.519	139.424	128.53	98.559
1102	ENSG00000163904	SENP2	159.727	-0.700119	0.467655	-1.49709	0.134371	0.382384	276.542	169.097	121.364	124.274	107.359
1103	ENSG00000102144	PGK1	243.529	-0.559736	0.37405	-1.49642	0.134544	0.382529	345.678	241.874	251.396	199.179	179.518
1104	ENSG00000180964	TCEAL8	208.871	-0.636745	0.425718	-1.4957	0.134732	0.382718	257.42	315.72	158.206	137.893	175.118
1105	ENSG00000169641	LUZP1	388.565	-0.537631	0.35973	-1.49454	0.135034	0.383227	511.898	361.74	458.003	376.227	234.958
1106	ENSG00000100554	ATP6V1D	192.124	0.570475	0.381993	1.49342	0.135327	0.383367	148.568	178.73	155.317	228.971	249.037
1107	ENSG00000115241	PPM1G	566.666	-0.456052	0.305294	-1.49381	0.135224	0.383367	698.711	646.423	562.029	429.852	496.315
1108	ENSG00000149136	SSRP1	644.303	-0.520402	0.349123	-1.4906	0.136067	0.384767	895.821	828.363	476.063	480.072	541.194
1109	ENSG00000170606	HSPA4	338.831	-0.498012	0.334012	-1.491	0.135961	0.384767	411.872	405.62	333.75	261.316	281.597
1110	ENSG00000266944	0	209.098	-0.59037	0.396651	-1.48838	0.13665	0.386066	182.4	264.349	277.403	177.899	143.438
1111	ENSG00000060982	BCAT1	88.8246	0.897744	0.603397	1.48782	0.136799	0.386141	85.3163	24.6155	88.1331	114.06	131.999
1112	ENSG00000029725	RABEP1	262.262	-0.515563	0.346769	-1.48676	0.137077	0.38623	301.549	290.034	302.687	210.244	206.798
1113	ENSG00000136718	IMP4	210.467	-0.615704	0.414027	-1.48711	0.136986	0.38623	201.523	338.195	193.604	168.536	150.478
1114	ENSG00000170876	TMEM43	84.5228	0.829034	0.557989	1.48575	0.137344	0.386635	35.3033	84.5487	72.9627	100.441	129.359
1115	ENSG00000075420	FNDC3B	231.167	0.578556	0.389935	1.48372	0.137883	0.387659	154.452	172.308	251.396	274.084	303.597
1116	ENSG00000137409	MTCH1	284.436	0.506014	0.341107	1.48345	0.137955	0.387659	247.123	242.944	240.56	367.715	323.837
1117	ENSG00000101966	XIAP	212.375	0.829697	0.561234	1.47834	0.139316	0.391131	47.0711	151.974	285.349	280.042	297.437
1118	ENSG00000087269	NOP14	164.966	0.592524	0.401665	1.47517	0.140167	0.391768	130.916	156.255	124.253	213.649	199.758
1119	ENSG00000089486	CDIP1	94.4702	-0.765847	0.518524	-1.47697	0.139682	0.391768	107.381	138.061	93.9124	48.5179	84.4791
1120	ENSG00000169714	CNBP	242.619	-0.569636	0.385968	-1.47586	0.13998	0.391768	269.188	331.773	236.226	151.512	224.398
1121	ENSG00000178988	MRFAP1L1	146.153	-0.615151	0.416908	-1.47551	0.140075	0.391768	176.516	149.833	182.768	107.25	114.399
1122	ENSG00000222041	CYTOR	411.674	0.497852	0.337204	1.47641	0.139833	0.391768	395.691	302.877	361.924	417.084	580.794
1123	ENSG00000163320	CGGBP1	123.647	-0.756023	0.513237	-1.47305	0.140738	0.393014	191.226	170.168	82.3539	70.6489	103.839
1124	ENSG00000170242	USP47	129.928	-0.768644	0.522474	-1.47116	0.141248	0.394086	200.052	191.572	75.8523	103.845	78.3192
1125	ENSG00000003436	TFPI	101.184	0.789538	0.538515	1.46614	0.14261	0.394422	42.6581	98.4618	93.19	165.131	106.479
1126	ENSG00000026025	VIM	4932.91	0.392312	0.266954	1.46959	0.141674	0.394422	4662.98	4785.03	3707.37	6223.06	5286.1
1127	ENSG00000069011	PITX1	413.652	-0.479096	0.326438	-1.46765	0.1422	0.394422	423.64	475.185	499.903	290.256	379.276
1128	ENSG00000075539	FRYL	108.746	-0.71256	0.485239	-1.46847	0.141976	0.394422	169.162	118.796	98.9692	73.2025	83.5991
1129	ENSG00000125676	THOC2	500.026	-0.470405	0.319981	-1.4701	0.141534	0.394422	636.93	592.911	458.726	383.887	427.675
1130	ENSG00000139233	LLPH	169.407	0.912469	0.621318	1.4686	0.14194	0.394422	23.5355	161.606	189.27	205.988	266.637
1131	ENSG00000160789	LMNA	764.963	-0.495114	0.337713	-1.46608	0.142626	0.394422	1153.24	785.554	658.831	531.995	695.193
1132	ENSG00000170027	YWHAG	712.312	-0.481191	0.328189	-1.4662	0.142594	0.394422	923.77	922.544	564.919	566.894	583.434
1133	ENSG00000196968	FUT11	95.2364	0.740076	0.504217	1.46777	0.142166	0.394422	75.0195	54.5821	95.3572	117.464	133.759
1134	ENSG00000204525	HLA-C	204.39	0.624244	0.425446	1.46727	0.142303	0.394422	102.968	210.837	189.27	243.441	275.437
1135	ENSG00000099783	HNRNPM	614.907	-0.475465	0.325153	-1.46228	0.143664	0.396594	726.659	834.785	517.24	503.054	492.795
1136	ENSG00000182158	CREB3L2	164.336	0.62199	0.425298	1.46248	0.14361	0.396594	108.852	130.569	165.43	242.59	174.238
1137	ENSG00000171456	ASXL1	194.178	-0.664981	0.455419	-1.46015	0.144248	0.397856	233.884	320.001	130.033	153.214	133.759
1138	ENSG00000160714	UBE2Q1	104.092	-0.782495	0.536242	-1.45922	0.144504	0.398212	158.865	146.622	70.0731	86.8215	58.0794
1139	ENSG00000164323	CFAP97	147.163	0.64962	0.4457	1.45753	0.144971	0.399147	86.7873	160.536	111.972	185.56	190.958
1140	ENSG00000143093	STRIP1	90.6918	-0.804015	0.553674	-1.45214	0.146462	0.402193	142.684	125.218	60.6818	54.4763	70.3993
1141	ENSG00000159216	RUNX1	134.826	-0.646733	0.445221	-1.45261	0.146332	0.402193	201.523	138.061	133.645	96.1846	104.719
1142	ENSG00000168175	MAPK1IP1L	82.6005	0.773122	0.532354	1.45227	0.146426	0.402193	51.484	53.5119	87.4107	112.357	108.239
1143	ENSG00000108344	PSMD3	243.954	-0.587475	0.40476	-1.45142	0.146664	0.402395	303.02	357.459	184.935	197.476	176.878
1144	ENSG00000126524	SBDS	189.565	0.575551	0.397272	1.44876	0.147405	0.403909	176.516	151.974	147.37	277.488	194.478
1145	ENSG00000177700	POLR2L	1120.12	-0.414833	0.286385	-1.44851	0.147473	0.403909	1141.47	1116.26	1475.15	924.394	943.35
1146	ENSG00000060339	CCAR1	479.639	-0.454046	0.313853	-1.44668	0.147986	0.404959	600.156	549.032	464.505	403.465	381.036
1147	ENSG00000132612	VPS4A	206.671	-0.558861	0.386714	-1.44515	0.148415	0.40578	266.246	207.626	237.671	137.893	183.918
1148	ENSG00000115307	AUP1	431.593	-0.481706	0.333585	-1.44403	0.148731	0.40629	492.775	567.226	400.934	309.834	387.196
1149	ENSG00000143321	HDGF	396.946	0.475575	0.329593	1.44292	0.149044	0.40679	376.568	372.442	281.737	491.989	461.995
1150	ENSG00000163029	SMC6	273.893	-0.555095	0.386092	-1.43772	0.150512	0.41044	369.214	355.319	218.166	234.929	191.838
1151	ENSG00000066027	PPP2R5A	134.406	-0.771563	0.537238	-1.43617	0.150955	0.41129	226.529	187.291	70.0731	83.4168	104.719
1152	ENSG00000057019	DCBLD2	551.134	0.452764	0.315401	1.43552	0.15114	0.411376	401.575	571.507	467.395	687.763	627.433
1153	ENSG00000110321	EIF4G2	1265.53	-0.526006	0.366521	-1.43513	0.151249	0.411376	1803.41	1747.7	775.138	978.87	1022.55
1154	ENSG00000078618	NRDC	403.321	-0.459189	0.320373	-1.4333	0.151773	0.412444	430.994	482.677	444.278	299.619	359.036
1155	ENSG00000103035	PSMD7	288.689	-0.517823	0.36158	-1.43211	0.152111	0.412648	345.678	383.145	256.453	217.054	241.117
1156	ENSG00000115694	STK25	158.578	-0.633902	0.442601	-1.43222	0.152081	0.412648	211.82	220.469	122.808	124.274	113.519
1157	ENSG00000029363	BCLAF1	230.009	0.576247	0.40294	1.43011	0.152686	0.412738	233.884	138.061	205.162	336.221	236.718
1158	ENSG00000126012	KDM5C	138.363	-0.652029	0.456059	-1.4297	0.152802	0.412738	191.226	183.011	111.972	113.208	92.399
1159	ENSG00000164180	TMEM161B	82.1256	-0.884028	0.618054	-1.43034	0.152619	0.412738	120.62	138.061	43.3442	67.2441	41.3596
1160	ENSG00000164463	CREBRF	143.85	-0.697254	0.487557	-1.4301	0.152689	0.412738	258.891	138.061	113.417	94.4823	114.399
1161	ENSG00000166801	FAM111A	84.7416	0.751105	0.525192	1.43015	0.152673	0.412738	77.9614	50.3011	71.5179	91.9287	131.999
1162	ENSG00000204209	DAXX	157.579	0.674686	0.472369	1.4283	0.153205	0.413468	82.3744	108.094	189.992	182.155	225.278
1163	ENSG00000228462	RPS19P7	130.75	-0.695114	0.488477	-1.42302	0.154729	0.417223	182.4	191.572	89.578	100.441	89.7591
1164	ENSG00000108175	ZMIZ1	236.182	-0.538279	0.378731	-1.42127	0.155238	0.417477	220.646	253.646	334.473	184.709	187.438
1165	ENSG00000131966	ACTR10	98.1744	-0.746252	0.524852	-1.42183	0.155074	0.417477	116.207	161.606	73.6851	68.0953	71.2792
1166	ENSG00000157954	WIPI2	151.153	0.642373	0.452064	1.42098	0.155323	0.417477	77.9614	143.412	148.093	208.542	177.758
1167	ENSG00000162521	RBBP4	82.6774	-0.823564	0.579621	-1.42087	0.155356	0.417477	76.4905	136.99	86.6883	34.8989	78.3192
1168	ENSG00000078668	VDAC3	131.271	-0.821547	0.579093	-1.41868	0.155993	0.418394	292.723	112.375	72.2403	92.7799	86.2391
1169	ENSG00000117155	SSX2IP	82.3391	-0.818019	0.576642	-1.41859	0.156019	0.418394	152.981	87.7594	58.5146	57.881	54.5594
1170	ENSG00000169895	SYAP1	345.3	0.635619	0.448149	1.41832	0.156097	0.418394	139.742	255.787	450.779	410.274	469.915
1171	ENSG00000153774	CFDP1	137.682	-0.687957	0.485382	-1.41735	0.15638	0.418793	219.175	174.449	93.9124	97.0358	103.839
1172	ENSG00000112977	DAP	206.049	0.556593	0.392981	1.41634	0.156677	0.419231	135.329	172.308	211.664	269.828	241.117
1173	ENSG00000148848	ADAM12	84.879	0.73018	0.515889	1.41538	0.156956	0.419263	61.7808	83.4785	56.3474	99.5894	123.199
1174	ENSG00000204381	LAYN	102.9	0.724819	0.512087	1.41542	0.156945	0.419263	104.439	50.3011	90.3004	150.661	118.799
1175	ENSG00000178741	COX5A	251.992	-0.527522	0.373009	-1.41423	0.157293	0.419805	272.13	306.088	283.182	158.322	240.237
1176	ENSG00000176915	ANKLE2	79.7596	0.777706	0.550504	1.41272	0.157739	0.420638	44.1291	56.7226	84.5211	90.2263	123.199
1177	ENSG00000006831	ADIPOR2	107.788	0.683229	0.484448	1.41032	0.158444	0.420881	116.207	67.4249	77.2971	131.935	146.078
1178	ENSG00000101825	MXRA5	201.151	-0.595626	0.422056	-1.41125	0.158171	0.420881	314.788	171.238	212.386	175.345	131.999
1179	ENSG00000103342	GSPT1	476.78	-0.47594	0.337515	-1.41013	0.158501	0.420881	641.343	573.647	397.322	394.953	376.636
1180	ENSG00000140990	NDUFB10	133.261	0.684702	0.485451	1.41045	0.158408	0.420881	60.3098	123.077	137.257	187.262	158.398
1181	ENSG00000164054	SHISA5	150.818	-0.622423	0.441109	-1.41104	0.158233	0.420881	202.994	181.94	141.591	88.5239	139.039
1182	ENSG00000148450	MSRB2	179.159	-0.593999	0.421776	-1.40833	0.159034	0.421581	245.652	158.395	217.443	111.506	162.798
1183	ENSG00000168461	RAB31	220.39	0.5515	0.391536	1.40856	0.158966	0.421581	135.329	204.415	216.721	289.405	256.077
1184	ENSG00000198648	STK39	104.327	0.692448	0.492567	1.40579	0.159785	0.423214	60.3098	82.4083	107.638	148.959	122.319
1185	ENSG00000112902	SEMA5A	243.207	0.554507	0.39483	1.40442	0.160194	0.423444	161.807	173.378	278.125	314.09	288.637
1186	ENSG00000145715	RASA1	155.728	0.578281	0.411579	1.40503	0.160012	0.423444	127.974	124.147	137.979	220.459	168.078
1187	ENSG00000181222	POLR2A	106.425	-0.691459	0.492443	-1.40414	0.160277	0.423444	170.633	101.673	104.748	72.3513	82.7191
1188	ENSG00000100105	PATZ1	113.717	-0.653203	0.465539	-1.40311	0.160583	0.42354	161.807	129.499	108.36	79.1608	89.7591
1189	ENSG00000124172	ATP5F1E	536.251	0.464962	0.331275	1.40355	0.160451	0.42354	413.343	389.566	592.37	589.025	696.953
1190	ENSG00000142599	RERE	125.905	0.878391	0.627255	1.40037	0.161402	0.424649	20.5936	118.796	142.313	175.345	172.478
1191	ENSG00000169499	PLEKHA2	95.5671	-0.711162	0.507848	-1.40034	0.16141	0.424649	145.626	95.2511	98.9692	57.0298	80.9591
1192	ENSG00000225746	MEG8	122.153	0.668604	0.477451	1.40036	0.161405	0.424649	67.6646	103.813	124.253	182.155	132.879
1193	ENSG00000113758	DBN1	323.928	-0.520749	0.372007	-1.39984	0.161562	0.424694	407.459	436.657	262.232	226.417	286.877
1194	ENSG00000007392	LUC7L	150.946	-0.775234	0.554235	-1.39875	0.161889	0.424841	83.8453	318.931	140.146	85.9703	125.839
1195	ENSG00000160551	TAOK1	470.439	0.503083	0.35963	1.39889	0.161846	0.424841	319.201	325.352	563.474	566.894	577.274
1196	ENSG00000133657	ATP13A3	335.681	0.582126	0.416524	1.39758	0.162238	0.425401	192.697	208.696	437.054	429.001	410.956
1197	ENSG00000159479	MED8	104.011	-0.671455	0.481062	-1.39578	0.162782	0.426469	154.452	107.024	105.471	78.3096	74.7992
1198	ENSG00000008083	JARID2	169.206	-0.669635	0.480045	-1.39494	0.163033	0.426772	308.904	116.656	171.209	123.423	125.839
1199	ENSG00000125505	MBOAT7	259.759	-0.699006	0.501566	-1.39365	0.163425	0.427078	169.162	197.994	552.638	216.203	162.798
1200	ENSG00000138430	OLA1	312.566	-0.576152	0.41339	-1.39373	0.1634	0.427078	363.33	469.834	247.062	171.09	311.517
1201	ENSG00000161013	MGAT4B	228.478	-0.525442	0.377148	-1.3932	0.163559	0.427078	316.259	225.82	239.115	170.238	190.958
1202	ENSG00000103489	XYLT1	80.439	0.99555	0.715183	1.39202	0.163916	0.427299	11.7678	51.3714	108.36	125.976	104.719
1203	ENSG00000185298	CCDC137	85.451	0.96599	0.693877	1.39216	0.163873	0.427299	11.7678	75.9868	96.802	135.339	107.359
1204	ENSG00000024048	UBR2	100.229	-0.790936	0.568637	-1.39093	0.164245	0.427802	97.0841	199.064	65.7387	71.5001	67.7593
1205	ENSG00000182197	EXT1	142.757	0.695963	0.500811	1.38967	0.164629	0.428445	63.2517	103.813	174.821	165.982	205.918
1206	ENSG00000013297	CLDN11	206.398	0.556869	0.401017	1.38864	0.164943	0.428905	213.291	183.011	125.698	245.994	263.997
1207	ENSG00000127603	MACF1	1022.49	0.387852	0.279644	1.38695	0.165457	0.429888	909.06	813.38	1007.75	1192.52	1189.75
1208	ENSG00000129003	VPS13C	183.276	-0.549447	0.396865	-1.38447	0.166215	0.43125	253.007	184.081	192.882	143.851	142.558
1209	ENSG00000158195	WASF2	282.235	0.486159	0.3513	1.38388	0.166394	0.43125	210.349	283.613	235.503	346.435	335.276
1210	ENSG00000180357	ZNF609	216.04	-0.568288	0.410607	-1.38402	0.166352	0.43125	326.555	171.238	247.784	175.345	159.278
1211	ENSG00000154305	MIA3	115.842	-0.665632	0.481208	-1.38325	0.166587	0.431394	107.381	163.746	136.534	105.548	65.9993
1212	ENSG00000067066	SP100	122.445	0.679288	0.491286	1.38267	0.166765	0.431497	86.7873	140.201	69.3507	183.006	132.879
1213	ENSG00000165494	PCF11	110.095	-0.702239	0.508213	-1.38178	0.167039	0.431851	176.516	122.007	92.4676	97.887	61.5994
1214	ENSG00000090060	PAPOLA	242.806	-0.547038	0.396179	-1.38079	0.167345	0.432284	341.265	287.894	205.162	221.31	158.398
1215	ENSG00000124151	NCOA3	93.8598	-0.807201	0.585065	-1.37968	0.167686	0.432653	172.104	117.726	50.5682	65.5418	63.3593
1216	ENSG00000155876	RRAGA	126.246	-0.711528	0.515814	-1.37943	0.167763	0.432653	179.458	191.572	78.0195	77.4584	104.719
1217	ENSG00000119541	VPS4B	84.7141	0.774453	0.562232	1.37746	0.16837	0.433861	42.6581	52.4416	101.859	116.613	109.999
1218	ENSG00000167601	AXL	838.51	-0.448179	0.325818	-1.37555	0.168961	0.435027	1162.07	985.688	669.667	737.132	637.993
1219	ENSG00000076201	PTPN23	136.368	-0.674258	0.490445	-1.37479	0.169197	0.435275	241.239	132.709	107.638	89.3751	110.879
1220	ENSG00000103275	UBE2I	197.147	-0.604172	0.439781	-1.3738	0.169503	0.435349	320.672	217.258	148.093	166.834	132.879
1221	ENSG00000114302	PRKAR2A	1123.37	-0.392507	0.285686	-1.37391	0.169469	0.435349	1207.67	1420.2	1097.33	868.215	1023.43
1222	ENSG00000136868	SLC31A1	138.318	0.617484	0.450305	1.37126	0.170295	0.436904	100.026	93.1106	148.093	152.363	197.998
1223	ENSG00000196154	S100A4	622.249	-0.513866	0.374822	-1.37096	0.170387	0.436904	651.64	466.623	1001.97	411.977	579.034
1224	ENSG00000115963	RND3	1952.06	0.489021	0.356925	1.37009	0.170657	0.43724	1253.27	1212.58	2574.64	2536.55	2183.26
1225	ENSG00000140285	FGF7	124.763	-0.648483	0.473666	-1.36907	0.170976	0.4377	120.62	184.081	132.922	114.911	71.2792
1226	ENSG00000139211	AMIGO2	266.272	0.681377	0.498041	1.36811	0.171276	0.438109	82.3744	209.766	349.643	348.137	341.436
1227	ENSG00000183137	CEP57L1	82.4666	-0.710034	0.519167	-1.36764	0.171425	0.438132	116.207	88.8297	88.1331	67.2441	51.9195
1228	ENSG00000168807	SNTB2	265.699	-0.624701	0.457315	-1.36602	0.171933	0.438716	366.272	417.392	144.481	209.393	190.958
1229	ENSG00000182899	RPL35A	493.355	0.440024	0.322092	1.36615	0.171893	0.438716	401.575	525.486	368.425	597.536	573.754
1230	ENSG00000184787	UBE2G2	223.012	0.550387	0.403493	1.36406	0.17255	0.439933	160.336	155.184	247.784	234.078	317.677
1231	ENSG00000145390	USP53	141.808	0.641735	0.470789	1.3631	0.17285	0.440338	69.1356	122.007	155.317	181.304	181.278
1232	ENSG00000142166	IFNAR1	114.653	0.807938	0.594115	1.3599	0.173861	0.442556	30.8904	81.338	150.982	147.256	162.798
1233	ENSG00000100320	RBFOX2	339.577	-0.496527	0.366262	-1.35566	0.175207	0.445619	448.646	433.446	271.623	250.25	293.917
1234	ENSG00000198700	IPO9	230.749	-0.505937	0.373894	-1.35315	0.176006	0.44729	280.955	210.837	293.296	183.857	184.798
1235	ENSG00000119820	YIPF4	81.7511	0.943201	0.699112	1.34914	0.177291	0.449864	13.2387	55.6523	109.083	123.423	107.359
1236	ENSG00000128272	ATF4	349.943	0.462664	0.342944	1.3491	0.177306	0.449864	279.484	263.278	368.425	445.173	393.356
1237	ENSG00000120705	ETF1	230.554	0.494653	0.367366	1.34649	0.178146	0.451115	202.994	170.168	221.055	267.274	291.277
1238	ENSG00000126351	THRA	107.351	-0.756905	0.561894	-1.34706	0.177961	0.451115	198.581	126.288	60.6818	82.5656	68.6393
1239	ENSG00000164506	STXBP5	84.0118	0.834686	0.620021	1.34622	0.178231	0.451115	22.0646	74.9166	93.9124	119.167	109.999
1240	ENSG00000145012	LPP	252.075	0.540757	0.402609	1.34313	0.17923	0.453278	136.8	225.82	275.958	322.602	299.197
1241	ENSG00000106153	CHCHD2	550.099	0.425439	0.317476	1.34007	0.180223	0.453958	544.259	510.503	397.322	585.62	712.792
1242	ENSG00000115756	HPCAL1	125.764	0.623949	0.465235	1.34115	0.179872	0.453958	116.207	123.077	71.5179	171.941	146.078
1243	ENSG00000162733	DDR2	331.914	0.512648	0.38268	1.33963	0.180367	0.453958	194.168	275.051	379.984	445.173	365.196
1244	ENSG00000172428	COPS9	102.632	0.775944	0.578715	1.34081	0.179984	0.453958	35.3033	133.78	70.0731	146.405	127.599
1245	ENSG00000173692	PSMD1	877.386	-0.404187	0.301663	-1.33986	0.18029	0.453958	989.963	785.554	1141.4	689.465	780.552
1246	ENSG00000204590	GNL1	182.639	-0.639932	0.477656	-1.33973	0.180332	0.453958	323.614	201.205	115.584	130.232	142.558
1247	ENSG00000182154	MRPL41	109.67	-0.646416	0.482956	-1.33846	0.180748	0.45455	91.2002	141.271	151.705	89.3751	74.7992
1248	ENSG00000172403	SYNPO2	80.4896	0.777028	0.580767	1.33793	0.180918	0.454614	32.3614	75.9868	78.7419	85.1192	130.239
1249	ENSG00000160991	ORAI2	299.07	-0.577152	0.43169	-1.33696	0.181235	0.455048	222.117	270.77	539.635	209.393	253.437
1250	ENSG00000130309	COLGALT1	79.9014	0.736435	0.551329	1.33574	0.181633	0.455681	64.7227	49.2309	75.1299	74.9049	135.519
1251	ENSG00000144118	RALB	143.101	0.644635	0.483659	1.33283	0.182588	0.45771	67.6646	170.168	111.972	193.22	172.478
1252	ENSG00000050405	LIMA1	516.549	0.404314	0.304001	1.32997	0.183527	0.458475	461.885	455.921	454.391	659.673	550.874
1253	ENSG00000069345	DNAJA2	108.078	0.661644	0.497402	1.3302	0.183452	0.458475	80.9034	118.796	63.5715	158.322	118.799
1254	ENSG00000102804	TSC22D1	107.994	-0.665605	0.499981	-1.33126	0.183103	0.458475	157.394	142.342	80.9091	76.6072	82.7191
1255	ENSG00000118257	NRP2	118.465	-0.623057	0.468577	-1.32968	0.183624	0.458475	170.633	116.656	126.421	104.697	73.9192
1256	ENSG00000171345	KRT19	155.473	0.659545	0.495831	1.33018	0.183458	0.458475	129.445	184.081	65.7387	171.941	226.158
1257	ENSG00000072506	HSD17B10	144.958	-0.600806	0.452714	-1.32712	0.184469	0.459662	141.213	230.101	132.2	118.316	102.959
1258	ENSG00000105270	CLIP3	136.353	-0.57349	0.4322	-1.32691	0.184539	0.459662	176.516	136.99	157.484	116.613	94.159
1259	ENSG00000248905	FMN1	128.896	0.605347	0.455945	1.32768	0.184285	0.459662	75.0195	115.586	128.588	165.131	160.158
1260	ENSG00000129562	DAD1	105.874	0.745928	0.563287	1.32424	0.185423	0.461132	54.4259	51.3714	143.036	135.339	145.198
1261	ENSG00000180875	GREM2	92.4253	0.916043	0.69163	1.32447	0.185347	0.461132	25.0065	33.1773	145.203	129.381	129.359
1262	ENSG00000065308	TRAM2	215.767	0.497742	0.376742	1.32117	0.186443	0.461776	192.697	156.255	206.607	243.441	279.837
1263	ENSG00000090273	NUDC	101.347	0.787206	0.595826	1.3212	0.186435	0.461776	30.8904	72.7761	130.755	118.316	153.998
1264	ENSG00000122786	CALD1	7730.08	-0.371424	0.281304	-1.32037	0.186713	0.461776	9804.02	9296.08	6406.99	6482.67	6660.65
1265	ENSG00000123983	ACSL3	282.388	-0.461967	0.349302	-1.32254	0.185987	0.461776	326.555	352.108	273.068	234.929	225.278
1266	ENSG00000124177	CHD6	132.865	-0.613747	0.464742	-1.32062	0.186628	0.461776	201.523	154.114	107.638	91.9287	109.119
1267	ENSG00000136108	CKAP2	93.2687	-0.659542	0.499257	-1.32105	0.186486	0.461776	117.678	123.077	87.4107	77.4584	60.7194
1268	ENSG00000173674	EIF1AX	229.713	0.574686	0.435173	1.32059	0.186638	0.461776	111.794	193.713	269.456	316.643	256.957
1269	ENSG00000065978	YBX1	1419.43	0.369107	0.279699	1.31965	0.18695	0.461999	1160.6	1411.64	1241.09	1829.21	1454.62
1270	ENSG00000131981	LGALS3	97.1628	0.723451	0.548638	1.31863	0.187293	0.46248	52.9549	56.7226	120.641	147.256	108.239
1271	ENSG00000145901	TNIP1	183.211	0.585732	0.44447	1.31782	0.187563	0.462784	163.278	94.1809	200.106	259.613	198.878
1272	ENSG00000101040	ZMYND8	95.7606	0.668678	0.508336	1.31542	0.188367	0.463767	72.0776	61.0035	98.9692	145.554	101.199
1273	ENSG00000161638	ITGA5	283.796	0.465555	0.354026	1.31503	0.188501	0.463767	202.994	284.683	250.674	352.393	328.237
1274	ENSG00000229659	RPL26P6	96.4222	-0.788544	0.599712	-1.31487	0.188553	0.463767	179.458	119.867	49.1234	80.8632	52.7994
1275	ENSG00000240270	RPL12P37	95.8512	-0.792805	0.602912	-1.31496	0.188524	0.463767	152.981	146.622	46.9562	83.4168	49.2795
1276	ENSG00000087274	ADD1	251.483	-0.506363	0.385398	-1.31387	0.18889	0.46423	364.801	279.332	212.386	193.22	207.678
1277	ENSG00000108349	CASC3	85.3423	0.663094	0.505605	1.31149	0.189694	0.465477	66.1937	63.144	78.0195	97.0358	122.319
1278	ENSG00000122741	DCAF10	137.219	0.652567	0.497442	1.31185	0.189572	0.465477	70.6066	92.0404	171.209	200.881	151.358
1279	ENSG00000123144	TRIR	292.938	-0.446315	0.341149	-1.30827	0.190783	0.467783	304.491	359.6	319.302	235.78	245.517
1280	ENSG00000117448	AKR1A1	157.806	-0.605885	0.46339	-1.30751	0.191041	0.468049	244.181	142.342	162.541	85.9703	153.998
1281	ENSG00000087111	PIGS	87.9004	-0.733637	0.561423	-1.30675	0.191299	0.468316	152.981	100.602	60.6818	69.7977	55.4394
1282	ENSG00000054118	THRAP3	258.283	0.496568	0.380401	1.30538	0.191763	0.469087	186.813	187.291	290.406	327.709	299.197
1283	ENSG00000143322	ABL2	448.359	0.418657	0.320896	1.30465	0.192013	0.469332	330.968	401.339	452.224	534.548	522.714
1284	ENSG00000244754	N4BP2L2	161.31	0.604924	0.463914	1.30396	0.192247	0.469539	105.91	94.1809	199.383	218.756	188.318
1285	ENSG00000113649	TCERG1	321.305	-0.479843	0.368298	-1.30287	0.19262	0.470084	479.536	320.001	288.239	273.232	245.517
1286	ENSG00000100364	KIAA0930	130.202	-0.629156	0.483379	-1.30158	0.19306	0.470506	185.342	179.8	90.3004	97.887	97.679
1287	ENSG00000103653	CSK	138.913	-0.58905	0.452599	-1.30148	0.193093	0.470506	207.407	114.515	159.651	102.994	109.999
1288	ENSG00000005238	FAM214B	122.618	-0.623444	0.479747	-1.29953	0.193763	0.471771	114.736	201.205	111.972	92.7799	92.399
1289	ENSG00000152223	EPG5	100.927	0.662406	0.510393	1.29783	0.194344	0.472819	116.207	57.7928	72.2403	139.595	118.799
1290	ENSG00000116221	MRPL37	172.078	0.59632	0.459838	1.29681	0.194698	0.472921	98.555	113.445	215.276	203.435	229.678
1291	ENSG00000148498	PARD3	197.991	-0.568791	0.438747	-1.2964	0.194838	0.472921	314.788	219.399	149.537	130.232	175.998
1292	ENSG00000151474	FRMD4A	86.0521	0.722023	0.556761	1.29683	0.19469	0.472921	41.1872	63.144	99.6916	127.679	98.559
1293	ENSG00000117899	MESD	355.33	-0.442455	0.34182	-1.29441	0.195524	0.474217	442.762	421.673	327.971	262.167	322.077
1294	ENSG00000100591	AHSA1	114.464	0.584028	0.452474	1.29075	0.196792	0.475898	110.323	86.6892	89.578	137.893	147.838
1295	ENSG00000160208	RRP1B	125.781	0.596782	0.462316	1.29085	0.196755	0.475898	72.0776	124.147	116.307	168.536	147.838
1296	ENSG00000163811	WDR43	808.407	-0.372781	0.28875	-1.29102	0.196697	0.475898	938.479	926.825	803.312	631.584	741.832
1297	ENSG00000221983	UBA52	1985.37	0.344308	0.26677	1.29065	0.196824	0.475898	1769.58	1609.64	1996.72	2196.07	2354.86
1298	ENSG00000068912	ERLEC1	189.065	-0.522776	0.405194	-1.29019	0.196986	0.475923	179.458	273.981	192.159	140.447	159.278
1299	ENSG00000132688	NES	152.986	0.575266	0.446656	1.28794	0.197767	0.477442	94.1421	114.515	174.099	174.494	207.678
1300	ENSG00000006634	DBF4	90.0385	-0.6453	0.502093	-1.28522	0.198715	0.478604	108.852	118.796	88.1331	58.7322	75.6792
1301	ENSG00000061936	SFSWAP	119.915	0.663778	0.516906	1.28414	0.199094	0.478604	80.9034	58.863	150.982	157.47	151.358
1302	ENSG00000111481	COPZ1	81.5154	-0.679272	0.529054	-1.28394	0.199164	0.478604	105.91	111.305	70.7955	55.3275	64.2393
1303	ENSG00000133112	TPT1	1456.26	0.346724	0.269894	1.28467	0.198909	0.478604	1244.44	1301.41	1394.24	1537.25	1803.98
1304	ENSG00000135698	MPHOSPH6	207.814	0.484748	0.377279	1.28485	0.198843	0.478604	208.878	161.606	167.597	251.953	249.037
1305	ENSG00000170759	KIF5B	1216.56	-0.395432	0.307787	-1.28476	0.198878	0.478604	1481.27	1579.67	976.689	1038.45	1006.71
1306	ENSG00000275066	SYNRG	200.432	-0.522248	0.406979	-1.28323	0.199412	0.478833	300.078	204.415	180.601	148.107	168.958
1307	ENSG00000116478	HDAC1	179.986	-0.567926	0.443367	-1.28094	0.200215	0.480393	276.542	207.626	137.257	117.464	161.038
1308	ENSG00000169764	UGP2	215.275	-0.480102	0.375217	-1.27953	0.20071	0.481214	226.529	222.609	278.848	184.709	163.678
1309	ENSG00000135316	SYNCRIP	197.849	-0.649924	0.508353	-1.27849	0.201076	0.481723	320.672	278.262	96.0796	172.792	121.439
1310	ENSG00000126778	SIX1	129.106	-0.553036	0.432868	-1.27761	0.201387	0.482099	135.329	153.044	155.317	94.4823	107.359
1311	ENSG00000105058	FAM32A	239.467	-0.514949	0.40372	-1.27551	0.202129	0.482236	325.084	313.579	178.434	179.601	200.638
1312	ENSG00000165813	CCDC186	113.372	-0.588041	0.460882	-1.27591	0.201989	0.482236	154.452	129.499	109.083	90.2263	83.5991
1313	ENSG00000167986	DDB1	84.1919	0.698093	0.547407	1.27527	0.202213	0.482236	39.7162	82.4083	79.4643	122.572	96.799
1314	ENSG00000177733	HNRNPA0	180.148	-0.560331	0.438786	-1.277	0.201601	0.482236	276.542	210.837	133.645	133.637	146.078
1315	ENSG00000197958	RPL12	833.691	0.395694	0.310229	1.27549	0.202136	0.482236	603.098	696.724	919.619	1045.26	903.75
1316	ENSG00000147123	NDUFB11	199.218	-0.481313	0.377755	-1.27414	0.202614	0.482825	210.349	219.399	244.172	153.214	168.958
1317	ENSG00000134001	EIF2S1	136.497	0.654935	0.514593	1.27272	0.203116	0.483289	67.6646	83.4785	180.601	193.22	157.518
1318	ENSG00000162458	FBLIM1	187.462	0.655804	0.515277	1.27272	0.203117	0.483289	72.0776	119.867	263.677	250.25	231.438
1319	ENSG00000110768	GTF2H1	96.5407	-0.680594	0.536991	-1.26742	0.205005	0.487411	151.51	124.147	65.7387	62.9882	78.3192
1320	ENSG00000127884	ECHS1	219.157	-0.557282	0.440105	-1.26625	0.205424	0.488038	160.336	217.258	375.649	175.345	167.198
1321	ENSG00000024422	EHD2	366.864	0.433459	0.34269	1.26487	0.205917	0.488687	255.949	321.071	387.208	448.578	421.516
1322	ENSG00000076108	BAZ2A	276.219	0.478863	0.378662	1.26462	0.206009	0.488687	169.162	297.526	248.507	345.584	320.317
1323	ENSG00000069329	VPS35	398.376	-0.463805	0.366977	-1.26385	0.206283	0.488968	620.75	382.075	340.974	326.006	322.077
1324	ENSG00000089737	DDX24	490.33	0.504284	0.399461	1.26241	0.2068	0.489085	294.194	303.947	660.276	599.239	593.994
1325	ENSG00000111912	NCOA7	150.185	-0.618749	0.490285	-1.26202	0.206942	0.489085	147.097	267.559	109.083	99.5894	127.599
1326	ENSG00000126067	PSMB2	156.253	-0.532763	0.421743	-1.26324	0.206502	0.489085	207.407	147.693	179.878	107.25	139.039
1327	ENSG00000157020	SEC13	85.4875	0.653181	0.517585	1.26198	0.206957	0.489085	52.9549	70.6356	84.5211	97.887	121.439
1328	ENSG00000087586	AURKA	111.603	0.583893	0.463032	1.26102	0.207301	0.489529	76.4905	109.164	93.19	149.81	129.359
1329	ENSG00000177731	FLII	200.09	-0.564853	0.448285	-1.26003	0.207658	0.489635	341.265	205.486	143.758	150.661	159.278
1330	ENSG00000221914	PPP2R2A	192.209	0.482808	0.383096	1.26028	0.207568	0.489635	172.104	149.833	175.544	213.649	249.917
1331	ENSG00000101363	MANBAL	135.734	0.783788	0.622405	1.25929	0.207926	0.489759	94.1421	28.8964	192.159	154.917	208.558
1332	ENSG00000107581	EIF3A	2235.91	0.36319	0.288549	1.25868	0.208146	0.489759	1651.9	1848.3	2516.85	2612.31	2550.21
1333	ENSG00000137776	SLTM	247.506	0.465181	0.369634	1.25849	0.208215	0.489759	179.458	203.345	260.787	287.703	306.237
1334	ENSG00000141076	UTP4	126.948	-0.619255	0.492515	-1.25733	0.208633	0.489759	220.646	109.164	113.417	87.6727	103.839
1335	ENSG00000141279	NPEPPS	222.378	-0.488292	0.388426	-1.2571	0.208716	0.489759	322.143	218.328	213.831	172.792	184.798
1336	ENSG00000166394	CYB5R2	89.7951	0.965627	0.768165	1.25706	0.208733	0.489759	5.88388	117.726	70.7955	122.572	131.999
1337	ENSG00000174238	PITPNA	182.148	-0.566637	0.450835	-1.25686	0.208804	0.489759	295.665	195.853	137.257	119.167	162.798
1338	ENSG00000153904	DDAH1	402.688	0.445089	0.354417	1.25583	0.209176	0.490266	319.201	309.299	426.218	377.929	580.794
1339	ENSG00000123240	OPTN	488.667	0.408724	0.325761	1.25467	0.209597	0.490886	335.381	461.272	498.458	577.108	571.114
1340	ENSG00000180370	PAK2	228.664	0.498442	0.397694	1.25333	0.210085	0.491662	228	139.131	221.778	311.536	242.877
1341	ENSG00000178950	GAK	81.2809	0.650309	0.519134	1.25268	0.210322	0.491849	73.5485	51.3714	73.6851	100.441	107.359
1342	ENSG00000084093	REST	214.919	0.538972	0.430909	1.25078	0.211015	0.492002	136.8	139.131	268.734	280.893	249.037
1343	ENSG00000088205	DDX18	171.605	0.584768	0.467251	1.25151	0.210749	0.492002	107.381	101.673	218.888	240.887	189.198
1344	ENSG00000103429	BFAR	169.201	0.663481	0.530272	1.25121	0.210858	0.492002	51.484	163.746	195.049	256.209	179.518
1345	ENSG00000153786	ZDHHC7	82.65	-0.676318	0.540613	-1.25102	0.210927	0.492002	104.439	120.937	66.4611	52.7739	68.6393
1346	ENSG00000114127	XRN1	99.8554	-0.634238	0.508948	-1.24617	0.212701	0.494829	161.807	84.5487	103.304	77.4584	72.1592
1347	ENSG00000132842	AP3B1	96.679	0.736204	0.590538	1.24667	0.21252	0.494829	60.3098	36.3881	131.477	129.381	125.839
1348	ENSG00000173905	GOLIM4	387.508	0.418137	0.335485	1.24637	0.21263	0.494829	326.555	285.753	411.77	467.304	446.155
1349	ENSG00000006715	VPS41	101.539	-0.747089	0.60013	-1.24488	0.213176	0.495201	75.0195	69.5654	218.166	59.5834	85.3591
1350	ENSG00000154518	ATP5MC3	247.136	0.498741	0.400531	1.2452	0.213059	0.495201	235.355	255.787	145.925	253.655	344.956
1351	ENSG00000011007	ELOA	98.0012	0.62449	0.502404	1.243	0.213867	0.495294	110.323	68.4952	63.5715	120.018	127.599
1352	ENSG00000075568	TMEM131	107.756	0.821287	0.66034	1.24373	0.213597	0.495294	23.5355	57.7928	164.708	138.744	153.998
1353	ENSG00000134910	STT3A	142.466	-0.549517	0.442516	-1.2418	0.21431	0.495294	213.291	146.622	130.033	111.506	110.879
1354	ENSG00000136819	C9orf78	161.745	0.605719	0.487778	1.24179	0.214313	0.495294	77.9614	115.586	206.607	174.494	234.078
1355	ENSG00000165219	GAPVD1	150.312	-0.507603	0.408915	-1.24134	0.21448	0.495294	170.633	171.238	169.765	113.208	126.719
1356	ENSG00000166741	NNMT	221.67	0.574657	0.462452	1.24263	0.214005	0.495294	95.6131	176.589	282.46	280.893	272.797
1357	ENSG00000168701	TMEM208	114.089	-0.622468	0.501349	-1.24158	0.21439	0.495294	167.691	143.412	87.4107	68.0953	103.839
1358	ENSG00000213753	CENPBD2P	117.145	-0.637975	0.512829	-1.24403	0.213488	0.495294	89.7292	112.375	207.33	95.3335	80.9591
1359	ENSG00000160679	CHTOP	157.37	-0.626324	0.504797	-1.24075	0.2147	0.495409	261.833	128.428	159.651	71.5001	165.438
1360	ENSG00000223496	EXOSC6	125.695	0.58543	0.471988	1.24035	0.214846	0.495409	105.91	84.5487	123.531	198.328	116.159
1361	ENSG00000100029	PES1	107.799	-0.614105	0.496164	-1.2377	0.215826	0.496272	88.2582	140.201	146.648	97.887	65.9993
1362	ENSG00000142546	NOSIP	143.251	-0.558232	0.45074	-1.23848	0.215538	0.496272	142.684	188.362	161.818	81.7144	141.679
1363	ENSG00000168172	HOOK3	394.112	0.471326	0.380724	1.23797	0.215726	0.496272	270.659	257.927	494.124	491.138	456.715
1364	ENSG00000175573	C11orf68	254.846	-0.550987	0.445195	-1.23763	0.215853	0.496272	458.943	240.803	176.989	189.816	207.678
1365	ENSG00000196199	MPHOSPH8	176.142	0.491382	0.397202	1.23711	0.216047	0.496354	155.923	129.499	169.042	198.328	227.918
1366	ENSG00000102178	UBL4A	92.1978	-0.695903	0.562855	-1.23638	0.216317	0.49661	157.394	97.3916	72.2403	45.9643	87.9991
1367	ENSG00000108861	DUSP3	236.431	0.489034	0.395787	1.2356	0.216608	0.496915	145.626	225.82	238.393	328.56	243.757
1368	ENSG00000163110	PDLIM5	583.885	0.565807	0.4584	1.23431	0.217088	0.497653	214.762	402.409	850.268	702.233	749.752
1369	ENSG00000177311	ZBTB38	321.33	0.492682	0.399685	1.23268	0.217696	0.498682	166.22	308.228	353.255	437.512	341.436
1370	ENSG00000095380	NANS	179.31	-0.493994	0.401247	-1.23115	0.218268	0.498859	239.768	200.134	169.042	134.488	153.118
1371	ENSG00000110619	CARS1	370.22	0.41415	0.336326	1.2314	0.218175	0.498859	303.02	285.753	390.82	458.792	412.716
1372	ENSG00000127914	AKAP9	402.208	-0.436137	0.354314	-1.23093	0.218348	0.498859	592.801	354.248	400.934	351.542	311.517
1373	ENSG00000176142	TMEM39A	117.241	-0.653537	0.531	-1.23077	0.21841	0.498859	208.878	130.569	72.9627	91.0775	82.7191
1374	ENSG00000100219	XBP1	106.767	-0.661766	0.5382	-1.22959	0.21885	0.499501	200.052	95.2511	80.9091	74.9049	82.7191
1375	ENSG00000110917	MLEC	576.613	-0.384966	0.313942	-1.22623	0.220112	0.501789	610.453	760.939	537.468	466.453	507.755
1376	ENSG00000276168	RN7SL1	182.381	-0.581598	0.47436	-1.22607	0.220173	0.501789	192.697	301.807	136.534	99.5894	181.278
1377	ENSG00000075413	MARK3	303.168	-0.470908	0.384383	-1.2251	0.220538	0.502185	466.298	245.084	312.8	241.738	249.917
1378	ENSG00000107341	UBE2R2	204.675	0.508903	0.415514	1.22476	0.220667	0.502185	116.207	224.75	183.49	234.929	263.997
1379	ENSG00000039523	RIPOR1	109.995	-0.619182	0.506206	-1.22318	0.221261	0.502575	133.858	171.238	78.7419	83.4168	82.7191
1380	ENSG00000107249	GLIS3	94.4166	-0.699781	0.572241	-1.22288	0.221376	0.502575	102.968	171.238	60.6818	54.4763	82.7191
1381	ENSG00000136930	PSMB7	325.725	0.509525	0.416754	1.2226	0.221479	0.502575	166.22	263.278	404.546	339.625	454.955
1382	ENSG00000167693	NXN	230.811	0.45047	0.368159	1.22358	0.221113	0.502575	230.942	179.8	193.604	294.512	255.197
1383	ENSG00000099331	MYO9B	152.698	0.554945	0.454865	1.22002	0.222456	0.503129	139.742	80.2678	165.43	192.369	185.678
1384	ENSG00000099991	CABIN1	113.303	0.84636	0.693227	1.2209	0.222124	0.503129	11.7678	115.586	129.31	153.214	156.638
1385	ENSG00000134884	ARGLU1	604.735	-0.372703	0.30529	-1.22082	0.222155	0.503129	700.182	732.042	564.197	485.179	542.074
1386	ENSG00000154447	SH3RF1	161.29	0.604104	0.495232	1.21984	0.222526	0.503129	213.291	77.0571	111.25	232.375	172.478
1387	ENSG00000177565	TBL1XR1	114.401	-0.656997	0.538417	-1.22024	0.222374	0.503129	207.407	123.077	72.2403	94.4823	74.7992
1388	ENSG00000116117	PARD3B	140.711	0.513537	0.421433	1.21855	0.223015	0.50361	113.265	133.78	113.417	159.173	183.918
1389	ENSG00000125970	RALY	85.9883	0.607422	0.498527	1.21843	0.223059	0.50361	72.0776	77.0571	64.2939	102.994	113.519
1390	ENSG00000005073	HOXA11	106.331	-0.56872	0.46753	-1.21643	0.22382	0.504963	117.678	126.288	122.808	94.4823	70.3993
1391	ENSG00000101132	PFDN4	82.5198	-0.697454	0.573965	-1.21515	0.224308	0.505321	129.445	104.883	58.5146	75.756	43.9995
1392	ENSG00000152465	NMT2	293.388	0.481507	0.396294	1.21502	0.224357	0.505321	177.987	359.6	221.778	336.221	371.356
1393	ENSG00000174307	PHLDA3	146.635	-0.531853	0.437829	-1.21475	0.224462	0.505321	172.104	190.502	139.424	138.744	92.399
1394	ENSG00000136861	CDK5RAP2	194.966	-0.497299	0.41003	-1.21284	0.225193	0.506585	205.936	261.138	195.049	120.869	191.838
1395	ENSG00000185222	TCEAL9	369.684	0.430249	0.354864	1.21243	0.225346	0.506585	239.768	386.356	346.753	391.548	483.995
1396	ENSG00000114416	FXR1	232.922	-0.517008	0.426754	-1.21149	0.225708	0.506916	376.568	248.295	170.487	165.982	203.278
1397	ENSG00000164163	ABCE1	140.71	0.536616	0.443151	1.21091	0.22593	0.506916	97.0841	105.953	153.872	158.322	188.318
1398	ENSG00000204371	EHMT2	115.421	-0.60864	0.502683	-1.21078	0.225978	0.506916	194.168	119.867	88.1331	83.4168	91.519
1399	ENSG00000136770	DNAJC1	141.666	-0.514742	0.425457	-1.20986	0.226333	0.506987	142.684	179.8	160.373	124.274	101.199
1400	ENSG00000171451	DSEL	217.462	0.469997	0.388455	1.20991	0.226313	0.506987	172.104	154.114	238.393	260.465	262.237
1401	ENSG00000036549	ZZZ3	262.898	-0.548063	0.453287	-1.20909	0.22663	0.507289	488.362	177.659	237.671	212.798	197.998
1402	ENSG00000149485	FADS1	230.004	-0.513946	0.425263	-1.20854	0.22684	0.507398	242.71	170.168	370.593	194.072	172.478
1403	ENSG00000140367	UBE2Q2	90.0678	0.624905	0.517437	1.20769	0.227166	0.507763	67.6646	55.6523	98.2468	104.697	124.079
1404	ENSG00000008394	MGST1	150.665	0.531658	0.441096	1.20531	0.228084	0.509452	119.149	98.4618	165.43	161.726	208.558
1405	ENSG00000180104	EXOC3	120.818	-0.53766	0.44672	-1.20357	0.228755	0.510587	147.097	136.99	130.033	107.25	82.7191
[truncated: 61,298 more rows]

## Sheet: CBD 0.75uM_12h
	gene	Gene_name	baseMean	log2FoldChange	lfcSE	stat	pvalue	padj	K32	K33	K43	K1	K2	K3
[truncated: 62,703 more rows]

[truncated: 1 more sheets: CBD 3uM_12h]
