# Supplementary material for: Cannabidiol (CBD) modulates the transcriptional profile of ethanol-exposed human dermal fibroblast cells
Source: J Appl Genet. 2024 Oct 28;65(4):773–96. doi: 10.1007/s13353-024-00915-7 (PMC11561130; doi:10.1007/s13353-024-00915-7)
Supplement: Supplementary file 4 — Supplementary file4 (XLSX 6170 KB) [file 13353_2024_915_MOESM4_ESM.xlsx]

## Sheet: venn_result30287
Groups	total	Gene_ID	Gene_name	log2FoldChange
				CBD_3_6h	CBD_0.75_12h	CBD_3_12h	Mean
CBD_0.75_12h CBD_3_12h CBD_3_6h	71	ENSG00000144810	COL8A1	-1.60728	-1.59503	-1.39427	-1.53219
		ENSG00000278487	0	-1.92741	-2.39073	-2.2577	-2.19195
		ENSG00000236191	RPS15AP25	-1.64424	-2.69329	-2.40686	-2.24813
		ENSG00000100345	MYH9	-1.38502	-1.75811	-1.52279	-1.55531
		ENSG00000171812	COL8A2	-1.92918	-2.12418	-1.78122	-1.94486
		ENSG00000273870	0	-1.6541	-2.27222	-1.89781	-1.94138
		ENSG00000240163	RPL36AP44	-2.2698	-2.92892	-2.97906	-2.72593
		ENSG00000242706	RPS27AP9	-2.05166	-2.45858	-2.07573	-2.19532
		ENSG00000171159	BBLN	-1.61826	-2.21373	-2.16887	-2.00028
		ENSG00000140443	IGF1R	-1.54829	-1.88912	-1.57429	-1.67057
		ENSG00000216412	RPL12P2	-1.54307	-2.23154	-1.59916	-1.79126
		ENSG00000226242	RPS17P8	-1.79265	-2.50369	-2.08775	-2.12803
		ENSG00000268623	0	-1.81579	-2.87824	-2.49611	-2.39671
		ENSG00000231369	0	-1.72804	-2.65813	-1.92396	-2.10338
		ENSG00000225779	0	-2.55267	-2.79801	-2.43401	-2.59489
		ENSG00000205940	HSP90AB2P	-1.46564	-2.23422	-2.16329	-1.95439
		ENSG00000243759	ST13P15	-2.094	-2.20421	-2.01433	-2.10418
		ENSG00000256464	YWHABP2	-1.45325	-2.38716	-2.04824	-1.96288
		ENSG00000108821	COL1A1	-1.13984	-1.28886	-1.27847	-1.23572
		ENSG00000236238	0	-2.09334	-2.61029	-2.36915	-2.35759
		ENSG00000129219	PLD2	-1.50982	-1.76973	-2.00374	-1.7611
		ENSG00000225137	DYNC1I2P1	-2.12242	-1.8155	-2.00404	-1.98065
		ENSG00000102316	MAGED2	-1.62134	-1.34077	-1.30048	-1.42086
		ENSG00000224411	HSP90AA2P	-1.37692	-2.26347	-1.98253	-1.87431
		ENSG00000228453	RPS15AP9	-2.01717	-2.16826	-2.26949	-2.15164
		ENSG00000259160	0	-2.07606	-2.55899	-2.37615	-2.33707
		ENSG00000115935	WIPF1	-1.29748	-1.83164	-1.67422	-1.60111
		ENSG00000126814	TRMT5	-1.75196	-1.67083	-1.55326	-1.65868
		ENSG00000228657	RPL23AP58	-2.20025	-2.53882	-2.14213	-2.29373
		ENSG00000235379	RPL7P31	-1.67503	-2.46348	-2.25278	-2.13043
		ENSG00000215369	RPL37P3	-2.3995	-1.99027	-2.22606	-2.20528
		ENSG00000188375	H3-5	-1.49588	-2.08668	-1.92941	-1.83732
		ENSG00000203914	HSP90B3P	-1.81956	-1.81905	-1.81073	-1.81645
		ENSG00000214182	PTMAP5	-1.74113	-1.95385	-1.72992	-1.8083
		ENSG00000170801	HTRA3	-1.84415	-2.68522	-2.21472	-2.24803
		ENSG00000231434	HSP90AA3P	-2.18295	-2.53516	-2.21359	-2.31057
		ENSG00000132254	ARFIP2	-1.39152	-1.60564	-1.49706	-1.49807
		ENSG00000225443	RPL36AP27	-1.94235	-2.72267	-2.21584	-2.29362
		ENSG00000227081	0	-1.27329	-1.56346	-1.49201	-1.44292
		ENSG00000196923	PDLIM7	-1.76988	-1.91364	-1.77267	-1.81873
		ENSG00000164104	HMGB2	-1.50107	-1.76748	-1.62339	-1.63065
		ENSG00000079432	CIC	-1.48622	-1.61487	-1.53102	-1.54403
		ENSG00000243304	0	-1.58658	-2.2684	-2.10663	-1.9872
		ENSG00000182492	BGN	-1.6773	-1.65702	-1.59712	-1.64381
		ENSG00000078401	EDN1	-2.22337	-2.4254	-2.05337	-2.23405
		ENSG00000244753	RPL15P21	-1.69683	-2.46559	-2.42671	-2.19638
		ENSG00000130522	JUND	-1.75751	-1.54365	-1.36175	-1.5543
		ENSG00000104973	MED25	-1.7132	-2.22464	-1.81513	-1.91765
		ENSG00000225482	RPS6P14	-2.33092	-2.48128	-2.01227	-2.27482
		ENSG00000233839	0	-2.13114	-2.76428	-2.47508	-2.45683
		ENSG00000198225	FKBP1C	-1.56889	-1.65197	-1.5401	-1.58699
		ENSG00000171992	SYNPO	-1.61728	-2.0518	-1.7221	-1.79706
		ENSG00000235137	HSP90AB6P	-2.50249	-2.41581	-2.08213	-2.33348
		ENSG00000240463	RPS19P3	-1.47693	-2.01527	-1.77503	-1.75574
		ENSG00000214047	RPS11P7	-1.75071	-2.33456	-2.14072	-2.07533
		ENSG00000240950	0	-2.57716	-2.29606	-2.24636	-2.37319
		ENSG00000204262	COL5A2	-1.47391	-1.77592	-1.54648	-1.59877
		ENSG00000125378	BMP4	-2.015	-1.70418	-1.82537	-1.84818
		ENSG00000244053	RPL13AP2	-2.22105	-2.67515	-2.33668	-2.41096
		ENSG00000241352	0	-1.42559	-2.21628	-1.93127	-1.85771
		ENSG00000187957	DNER	-1.99641	-1.95279	-1.51268	-1.82063
		ENSG00000242137	RPL11P5	-2.59224	-2.66217	-2.32689	-2.5271
		ENSG00000219149	PPIAP87	-1.36074	-2.61616	-2.00992	-1.9956
		ENSG00000132635	PCED1A	-1.03737	-1.64166	-1.35072	-1.34325
		ENSG00000228224	NACA4P	-1.84888	-1.93016	-1.73135	-1.83679
		ENSG00000114439	BBX	-1.30239	-1.24163	-1.11248	-1.21883
		ENSG00000226110	0	-2.10993	-2.49902	-2.30772	-2.30556
		ENSG00000260109	0	-1.93269	-2.60952	-2.3523	-2.29817
		ENSG00000264316	MTCO3P13	-1.90261	-2.28557	-2.02012	-2.06943
		ENSG00000231500	RPS18	1.03432	1.32504	1.3304	1.22992
		ENSG00000170469	SPATA24	-2.05837	-2.45434	-2.15079	-2.22117
CBD_0.75_6h CBD_3_6h	2	ENSG00000159403	C1R
		ENSG00000108518	PFN1
CBD_0.75_12h CBD_3_6h	33	ENSG00000100626	GALNT16
		ENSG00000091656	ZFHX4
		ENSG00000213970	0
		ENSG00000161016	RPL8
		ENSG00000232128	MTCO3P45
		ENSG00000058262	SEC61A1
		ENSG00000168487	BMP1
		ENSG00000240498	CDKN2B-AS1
		ENSG00000086015	MAST2
		ENSG00000230359	TPI1P2
		ENSG00000157570	TSPAN18
		ENSG00000243680	RPL37P23
		ENSG00000140564	FURIN
		ENSG00000235297	FAUP1
		ENSG00000278943	0
		ENSG00000163382	NAXE
		ENSG00000180189	HMGB1P14
		ENSG00000130312	MRPL34
		ENSG00000179222	MAGED1
		ENSG00000143013	LMO4
		ENSG00000242327	0
		ENSG00000113328	CCNG1
		ENSG00000179031	NSA2P3
		ENSG00000149269	PAK1
		ENSG00000220771	BOLA2P3
		ENSG00000259020	0
		ENSG00000228887	EEF1DP1
		ENSG00000227747	0
		ENSG00000230175	0
		ENSG00000141376	BCAS3
		ENSG00000165912	PACSIN3
		ENSG00000168542	COL3A1
		ENSG00000175203	DCTN2
CBD_3_12h CBD_3_6h	19	ENSG00000171867	PRNP
		ENSG00000175550	DRAP1
		ENSG00000136448	NMT1
		ENSG00000140988	RPS2
		ENSG00000105576	TNPO2
		ENSG00000103187	COTL1
		ENSG00000117411	B4GALT2
		ENSG00000119812	FAM98A
		ENSG00000148737	TCF7L2
		ENSG00000132005	RFX1
		ENSG00000146674	IGFBP3
		ENSG00000165795	NDRG2
		ENSG00000214144	0
		ENSG00000110955	ATP5F1B
		ENSG00000196924	FLNA
		ENSG00000001617	SEMA3F
		ENSG00000159840	ZYX
		ENSG00000239809	0
		ENSG00000237205	RPL7P34
CBD_0.75_12h CBD_3_12h	29	ENSG00000149294	NCAM1
		ENSG00000243658	MTND5P16
		ENSG00000236048	SSBL5P
		ENSG00000232864	NUCKS1P1
		ENSG00000005022	SLC25A5
		ENSG00000183049	CAMK1D
		ENSG00000244422	RPL38P3
		ENSG00000122861	PLAU
		ENSG00000253558	0
		ENSG00000213862	RPL7AP62
		ENSG00000196405	EVL
		ENSG00000075413	MARK3
		ENSG00000159186	ATP5POP1
		ENSG00000214612	RPS19P1
		ENSG00000214087	ARL16
		ENSG00000172348	RCAN2
		ENSG00000224155	0
		ENSG00000237450	RPL23AP71
		ENSG00000287932	0
		ENSG00000163064	EN1
		ENSG00000227437	RPS8P4
		ENSG00000158195	WASF2
		ENSG00000170162	VGLL2
		ENSG00000173320	STOX2
		ENSG00000282949	PCMTD1P7
		ENSG00000064225	ST3GAL6
		ENSG00000198355	PIM3
		ENSG00000131737	KRT34
		ENSG00000136830	NIBAN2
CBD_3_6h	230	ENSG00000155366	RHOC
		ENSG00000087245	MMP2
		ENSG00000090316	MAEA
		ENSG00000122641	INHBA
		ENSG00000161970	RPL26
		ENSG00000108298	RPL19
		ENSG00000171490	RSL1D1
		ENSG00000147403	RPL10
		ENSG00000226080	RPL6P4
		ENSG00000115461	IGFBP5
		ENSG00000150093	ITGB1
		ENSG00000142937	RPS8
		ENSG00000103942	HOMER2
		ENSG00000105677	TMEM147
		ENSG00000174579	MSL2
		ENSG00000237170	RPS7P15
		ENSG00000143376	SNX27
		ENSG00000198431	TXNRD1
		ENSG00000170340	B3GNT2
		ENSG00000187840	EIF4EBP1
		ENSG00000167526	RPL13
		ENSG00000124766	SOX4
		ENSG00000132388	UBE2G1
		ENSG00000094916	CBX5
		ENSG00000213448	RPS23P2
		ENSG00000174444	RPL4
		ENSG00000073008	PVR
		ENSG00000155254	MARVELD1
		ENSG00000184867	ARMCX2
		ENSG00000184009	ACTG1
		ENSG00000134013	LOXL2
		ENSG00000227836	0
		ENSG00000109113	RAB34
		ENSG00000113732	ATP6V0E1
		ENSG00000225272	0
		ENSG00000206527	HACD2
		ENSG00000148296	SURF6
		ENSG00000133612	AGAP3
		ENSG00000171863	RPS7
		ENSG00000184900	SUMO3
		ENSG00000099956	SMARCB1
		ENSG00000198888	MT-ND1
		ENSG00000147164	SNX12
		ENSG00000081189	MEF2C
		ENSG00000119900	OGFRL1
		ENSG00000183684	ALYREF
		ENSG00000104853	CLPTM1
		ENSG00000197956	S100A6
		ENSG00000111540	RAB5B
		ENSG00000169715	MT1E
		ENSG00000074590	NUAK1
		ENSG00000162063	CCNF
		ENSG00000197157	SND1
		ENSG00000198840	MT-ND3
		ENSG00000204498	NFKBIL1
		ENSG00000104695	PPP2CB
		ENSG00000011422	PLAUR
		ENSG00000163430	FSTL1
		ENSG00000214753	HNRNPUL2
		ENSG00000181191	PJA1
		ENSG00000185088	RPS27L
		ENSG00000142156	COL6A1
		ENSG00000239039	SNORD13
		ENSG00000182287	AP1S2
		ENSG00000165527	ARF6
		ENSG00000136942	RPL35
		ENSG00000131507	NDFIP1
		ENSG00000151247	EIF4E
		ENSG00000226532	0
		ENSG00000241839	PLEKHO2
		ENSG00000183199	HSP90AB3P
		ENSG00000100354	TNRC6B
		ENSG00000109861	CTSC
		ENSG00000113657	DPYSL3
		ENSG00000020129	NCDN
		ENSG00000134371	CDC73
		ENSG00000183160	TMEM119
		ENSG00000153885	KCTD15
		ENSG00000160014	CALM3
		ENSG00000078369	GNB1
		ENSG00000198755	RPL10A
		ENSG00000275052	PPP4R3B
		ENSG00000162545	CAMK2N1
		ENSG00000135090	TAOK3
		ENSG00000134531	EMP1
		ENSG00000213791	0
		ENSG00000131473	ACLY
		ENSG00000108774	RAB5C
		ENSG00000100097	LGALS1
		ENSG00000236913	RPS13P3
		ENSG00000126457	PRMT1
		ENSG00000108854	SMURF2
		ENSG00000080503	SMARCA2
		ENSG00000089157	RPLP0
		ENSG00000160753	RUSC1
		ENSG00000166313	APBB1
		ENSG00000213885	RPL13AP7
		ENSG00000139329	LUM
		ENSG00000241553	ARPC4
		ENSG00000167535	CACNB3
		ENSG00000213787	RPL7AP38
		ENSG00000166452	AKIP1
		ENSG00000118971	CCND2
		ENSG00000164366	CCDC127
		ENSG00000127022	CANX
		ENSG00000092841	MYL6
		ENSG00000243777	0
		ENSG00000161547	SRSF2
		ENSG00000102225	CDK16
		ENSG00000099194	SCD
		ENSG00000141258	SGSM2
		ENSG00000131051	RBM39
		ENSG00000170017	ALCAM
		ENSG00000230611	HMGB1P27
		ENSG00000155229	MMS19
		ENSG00000144824	PHLDB2
		ENSG00000134294	SLC38A2
		ENSG00000169621	APLF
		ENSG00000090238	YPEL3
		ENSG00000105281	SLC1A5
		ENSG00000100644	HIF1A
		ENSG00000176340	COX8A
		ENSG00000166147	FBN1
		ENSG00000135940	COX5B
		ENSG00000166341	DCHS1
		ENSG00000166441	RPL27A
		ENSG00000198938	MT-CO3
		ENSG00000260032	NORAD
		ENSG00000198899	MT-ATP6
		ENSG00000230629	RPS23P8
		ENSG00000148303	RPL7A
		ENSG00000198763	MT-ND2
		ENSG00000112773	TENT5A
		ENSG00000133895	MEN1
		ENSG00000102081	FMR1
		ENSG00000075426	FOSL2
		ENSG00000121440	PDZRN3
		ENSG00000145555	MYO10
		ENSG00000183978	COA3
		ENSG00000077312	SNRPA
		ENSG00000198712	MT-CO2
		ENSG00000034152	MAP2K3
		ENSG00000240038	AMY2B
		ENSG00000170515	PA2G4
		ENSG00000175048	ZDHHC14
		ENSG00000069275	NUCKS1
		ENSG00000117632	STMN1
		ENSG00000171467	ZNF318
		ENSG00000206418	RAB12
		ENSG00000100075	SLC25A1
		ENSG00000164574	GALNT10
		ENSG00000167792	NDUFV1
		ENSG00000049618	ARID1B
		ENSG00000143614	GATAD2B
		ENSG00000074800	ENO1
		ENSG00000264364	DYNLL2
		ENSG00000169851	PCDH7
		ENSG00000128951	DUT
		ENSG00000092964	DPYSL2
		ENSG00000124145	SDC4
		ENSG00000226439	0
		ENSG00000148660	CAMK2G
		ENSG00000198171	DDRGK1
		ENSG00000171552	BCL2L1
		ENSG00000218426	0
		ENSG00000170004	CHD3
		ENSG00000224800	RPS27AP6
		ENSG00000039560	RAI14
		ENSG00000107833	NPM3
		ENSG00000112079	STK38
		ENSG00000196498	NCOR2
		ENSG00000206503	HLA-A
		ENSG00000125354	SEPTIN6
		ENSG00000065809	FAM107B
		ENSG00000091986	CCDC80
		ENSG00000197061	H4C3
		ENSG00000007168	PAFAH1B1
		ENSG00000240371	RPS4XP13
		ENSG00000131016	AKAP12
		ENSG00000131469	RPL27
		ENSG00000065548	ZC3H15
		ENSG00000196396	PTPN1
		ENSG00000228519	RANBP1P1
		ENSG00000105258	POLR2I
		ENSG00000134871	COL4A2
		ENSG00000177666	PNPLA2
		ENSG00000122406	RPL5
		ENSG00000204356	NELFE
		ENSG00000087460	GNAS
		ENSG00000089685	BIRC5
		ENSG00000172379	ARNT2
		ENSG00000177352	CCDC71
		ENSG00000159140	SON
		ENSG00000117519	CNN3
		ENSG00000137285	TUBB2B
		ENSG00000111667	USP5
		ENSG00000011451	WIZ
		ENSG00000068308	OTUD5
		ENSG00000163754	GYG1
		ENSG00000118523	CCN2
		ENSG00000132475	H3-3B
		ENSG00000164105	SAP30
		ENSG00000233762	RPS15P4
		ENSG00000080845	DLGAP4
		ENSG00000090621	PABPC4
		ENSG00000071575	TRIB2
		ENSG00000176343	RPL37AP8
		ENSG00000102265	TIMP1
		ENSG00000173511	VEGFB
		ENSG00000156976	EIF4A2
		ENSG00000149532	CPSF7
		ENSG00000213741	RPS29
		ENSG00000185825	BCAP31
		ENSG00000185650	ZFP36L1
		ENSG00000140259	MFAP1
		ENSG00000137309	HMGA1
		ENSG00000147548	NSD3
		ENSG00000204228	HSD17B8
		ENSG00000102317	RBM3
		ENSG00000130227	XPO7
		ENSG00000005483	KMT2E
		ENSG00000178982	EIF3K
		ENSG00000052802	MSMO1
		ENSG00000260257	0
		ENSG00000101412	E2F1
		ENSG00000164111	ANXA5
		ENSG00000198727	MT-CYB
		ENSG00000216676	RPL8P1
		ENSG00000115649	CNPPD1
		ENSG00000149257	SERPINH1
CBD_0.75_12h	47	ENSG00000226784	PGAM4
		ENSG00000234297	PSIP1P1
		ENSG00000214255	RPS2P6
		ENSG00000218476	RPL6P18
		ENSG00000198868	MTND4LP30
		ENSG00000101460	MAP1LC3A
		ENSG00000257074	RPL29P33
		ENSG00000138663	COPS4
		ENSG00000175749	EIF3KP1
		ENSG00000271428	MPHOSPH6P1
		ENSG00000185296	0
		ENSG00000197744	PTMAP2
		ENSG00000206228	HNRNPA1P4
		ENSG00000143494	VASH2
		ENSG00000269244	RPL23AP78
		ENSG00000235459	RPS26P31
		ENSG00000231084	RPL22P24
		ENSG00000075340	ADD2
		ENSG00000162493	PDPN
		ENSG00000236248	0
		ENSG00000126391	FRMD8
		ENSG00000234152	ELOBP1
		ENSG00000151376	ME3
		ENSG00000214286	PDCL3P3
		ENSG00000213430	HSPD1P1
		ENSG00000235803	MTCO2P23
		ENSG00000258357	NSA2P2
		ENSG00000257569	GSTP1P1
		ENSG00000171316	CHD7
		ENSG00000236692	MTCO1P10
		ENSG00000231767	RPS27AP5
		ENSG00000223945	RPL6P31
		ENSG00000085377	PREP
		ENSG00000242899	RPL7P16
		ENSG00000111665	CDCA3
		ENSG00000091879	ANGPT2
		ENSG00000253667	0
		ENSG00000224025	0
		ENSG00000213216	0
		ENSG00000160888	IER2
		ENSG00000100150	DEPDC5
		ENSG00000137821	LRRC49
		ENSG00000111912	NCOA7
		ENSG00000154146	NRGN
		ENSG00000270992	0
		ENSG00000233913	RPL10P9
		ENSG00000271418	0
CBD_3_12h	28	ENSG00000182985	CADM1
		ENSG00000008853	RHOBTB2
		ENSG00000137171	KLC4
		ENSG00000182117	NOP10
		ENSG00000205542	TMSB4X
		ENSG00000100106	TRIOBP
		ENSG00000103035	PSMD7
		ENSG00000170345	FOS
		ENSG00000173227	SYT12
		ENSG00000111676	ATN1
		ENSG00000236264	RPL26P30
		ENSG00000147862	NFIB
		ENSG00000137166	FOXP4
		ENSG00000159335	PTMS
		ENSG00000196586	MYO6
		ENSG00000006047	YBX2
		ENSG00000163431	LMOD1
		ENSG00000137809	ITGA11
		ENSG00000168488	ATXN2L
		ENSG00000108848	LUC7L3
		ENSG00000221852	KRTAP1-5
		ENSG00000119616	FCF1
		ENSG00000233668	0
		ENSG00000128829	EIF2AK4
		ENSG00000116133	DHCR24
		ENSG00000212724	KRTAP2-3
		ENSG00000132970	WASF3
		ENSG00000107984	DKK1
