# Supplementary material for: Cannabidiol (CBD) modulates the transcriptional profile of ethanol-exposed human dermal fibroblast cells
Source: J Appl Genet. 2024 Oct 28;65(4):773–96. doi: 10.1007/s13353-024-00915-7 (PMC11561130; doi:10.1007/s13353-024-00915-7)
Supplement: Supplementary file 5 — Supplementary file5 (XLSX 711 KB) [file 13353_2024_915_MOESM5_ESM.xlsx]

## Sheet: Annotation
userId	geneSymbol	geneName	entrezgene	score	gLink
ENSG00000078401	EDN1	endothelin 1	1906	-2.23405	https://www.ncbi.nlm.nih.gov/gene/?term=1906
ENSG00000079432	CIC	capicua transcriptional repressor	23152	-1.54403	https://www.ncbi.nlm.nih.gov/gene/?term=23152
ENSG00000100345	MYH9	myosin heavy chain 9	4627	-1.55531	https://www.ncbi.nlm.nih.gov/gene/?term=4627
ENSG00000102316	MAGED2	MAGE family member D2	10916	-1.42086	https://www.ncbi.nlm.nih.gov/gene/?term=10916
ENSG00000104973	MED25	mediator complex subunit 25	81857	-1.91765	https://www.ncbi.nlm.nih.gov/gene/?term=81857
ENSG00000108821	COL1A1	collagen type I alpha 1 chain	1277	-1.23572	https://www.ncbi.nlm.nih.gov/gene/?term=1277
ENSG00000114439	BBX	BBX, HMG-box containing	56987	-1.21883	https://www.ncbi.nlm.nih.gov/gene/?term=56987
ENSG00000115935	WIPF1	WAS/WASL interacting protein family member 1	7456	-1.60111	https://www.ncbi.nlm.nih.gov/gene/?term=7456
ENSG00000125378	BMP4	bone morphogenetic protein 4	652	-1.84818	https://www.ncbi.nlm.nih.gov/gene/?term=652
ENSG00000126814	TRMT5	tRNA methyltransferase 5	57570	-1.65868	https://www.ncbi.nlm.nih.gov/gene/?term=57570
ENSG00000129219	PLD2	phospholipase D2	5338	-1.7611	https://www.ncbi.nlm.nih.gov/gene/?term=5338
ENSG00000130522	JUND	JunD proto-oncogene, AP-1 transcription factor subunit	3727	-1.5543	https://www.ncbi.nlm.nih.gov/gene/?term=3727
ENSG00000132254	ARFIP2	ADP ribosylation factor interacting protein 2	23647	-1.49807	https://www.ncbi.nlm.nih.gov/gene/?term=23647
ENSG00000132635	PCED1A	PC-esterase domain containing 1A	64773	-1.34325	https://www.ncbi.nlm.nih.gov/gene/?term=64773
ENSG00000140443	IGF1R	insulin like growth factor 1 receptor	3480	-1.67057	https://www.ncbi.nlm.nih.gov/gene/?term=3480
ENSG00000144810	COL8A1	collagen type VIII alpha 1 chain	1295	-1.53219	https://www.ncbi.nlm.nih.gov/gene/?term=1295
ENSG00000164104	HMGB2	high mobility group box 2	3148	-1.63065	https://www.ncbi.nlm.nih.gov/gene/?term=3148
ENSG00000170469	SPATA24	spermatogenesis associated 24	202051	-2.22117	https://www.ncbi.nlm.nih.gov/gene/?term=202051
ENSG00000170801	HTRA3	HtrA serine peptidase 3	94031	-2.24803	https://www.ncbi.nlm.nih.gov/gene/?term=94031
ENSG00000171159	C9orf16	chromosome 9 open reading frame 16	79095	-2.00028	https://www.ncbi.nlm.nih.gov/gene/?term=79095
ENSG00000171812	COL8A2	collagen type VIII alpha 2 chain	1296	-1.94486	https://www.ncbi.nlm.nih.gov/gene/?term=1296
ENSG00000171992	SYNPO	synaptopodin	11346	-1.79706	https://www.ncbi.nlm.nih.gov/gene/?term=11346
ENSG00000182492	BGN	biglycan	633	-1.64381	https://www.ncbi.nlm.nih.gov/gene/?term=633
ENSG00000187957	DNER	delta/notch like EGF repeat containing	92737	-1.82063	https://www.ncbi.nlm.nih.gov/gene/?term=92737
ENSG00000188375	H3F3C	H3 histone family member 3C	440093	-1.83732	https://www.ncbi.nlm.nih.gov/gene/?term=440093
ENSG00000196923	PDLIM7	PDZ and LIM domain 7	9260	-1.81873	https://www.ncbi.nlm.nih.gov/gene/?term=9260
ENSG00000204262	COL5A2	collagen type V alpha 2 chain	1290	-1.59877	https://www.ncbi.nlm.nih.gov/gene/?term=1290
ENSG00000228224	NACA4P	NACA family member 4, pseudogene	83955	-1.83679	https://www.ncbi.nlm.nih.gov/gene/?term=83955
ENSG00000231500	RPS18	ribosomal protein S18	6222	1.22992	https://www.ncbi.nlm.nih.gov/gene/?term=6222

## Sheet: GSEA BP
geneSet	description	link	enrichmentScore	normalizedEnrichmentScore	pValue	FDR	size	userId
GO:0007517	muscle organ development	http://amigo.geneontology.org/amigo/term/GO:0007517	-0.730769	-1.53718	0.045677	0.459558	3	ENSG00000078401;ENSG00000125378;ENSG00000187957
GO:0060537	muscle tissue development	http://amigo.geneontology.org/amigo/term/GO:0060537	-0.730769	-1.53718	0.045677	0.459558	3	ENSG00000078401;ENSG00000125378;ENSG00000187957
GO:0071559	response to transforming growth factor beta	http://amigo.geneontology.org/amigo/term/GO:0071559	-0.783881	-1.65153	0.0278689	0.511093	3	ENSG00000078401;ENSG00000170801
GO:0016049	cell growth	http://amigo.geneontology.org/amigo/term/GO:0016049	-0.807692	-1.73716	0.0114754	0.588575	3	ENSG00000078401;ENSG00000170801;ENSG00000188375
GO:0003014	renal system process	http://amigo.geneontology.org/amigo/term/GO:0003014	-0.549499	-1.16748	0.250836	0.642294	3	ENSG00000078401;ENSG00000125378
GO:0001667	ameboidal-type cell migration	http://amigo.geneontology.org/amigo/term/GO:0001667	-0.531808	-1.11114	0.328881	0.666056	3	ENSG00000078401;ENSG00000125378
GO:0090130	tissue migration	http://amigo.geneontology.org/amigo/term/GO:0090130	-0.531808	-1.11114	0.328881	0.666056	3	ENSG00000078401;ENSG00000125378
GO:0042476	odontogenesis	http://amigo.geneontology.org/amigo/term/GO:0042476	-0.575324	-1.18366	0.281034	0.666439	3	ENSG00000078401;ENSG00000125378
GO:0060485	mesenchyme development	http://amigo.geneontology.org/amigo/term/GO:0060485	-0.575324	-1.18366	0.281034	0.666439	3	ENSG00000078401;ENSG00000125378
GO:0061448	connective tissue development	http://amigo.geneontology.org/amigo/term/GO:0061448	-0.575324	-1.18366	0.281034	0.666439	3	ENSG00000078401;ENSG00000125378
GO:0048568	embryonic organ development	http://amigo.geneontology.org/amigo/term/GO:0048568	-0.526269	-1.08696	0.322526	0.668523	3	ENSG00000078401;ENSG00000125378
GO:0051098	regulation of binding	http://amigo.geneontology.org/amigo/term/GO:0051098	-0.505523	-1.03305	0.393688	0.734692	3	ENSG00000104973;ENSG00000125378
GO:0001101	response to acid chemical	http://amigo.geneontology.org/amigo/term/GO:0001101	-0.402306	-0.836952	0.673043	0.775322	3	ENSG00000078401
GO:0009612	response to mechanical stimulus	http://amigo.geneontology.org/amigo/term/GO:0009612	-0.406207	-0.852	0.642249	0.77571	3	ENSG00000078401
GO:0050673	epithelial cell proliferation	http://amigo.geneontology.org/amigo/term/GO:0050673	-0.3453	-0.804933	0.676471	0.782255	4	ENSG00000125378;ENSG00000171812
GO:0048880	sensory system development	http://amigo.geneontology.org/amigo/term/GO:0048880	-0.347811	-0.808959	0.686567	0.796826	4	ENSG00000125378;ENSG00000171812
GO:0050817	coagulation	http://amigo.geneontology.org/amigo/term/GO:0050817	-0.406118	-0.85308	0.631488	0.803959	3	ENSG00000078401
GO:0050878	regulation of body fluid levels	http://amigo.geneontology.org/amigo/term/GO:0050878	-0.406118	-0.85308	0.631488	0.803959	3	ENSG00000078401
GO:0050900	leukocyte migration	http://amigo.geneontology.org/amigo/term/GO:0050900	-0.406118	-0.85308	0.631488	0.803959	3	ENSG00000078401
GO:0002237	response to molecule of bacterial origin	http://amigo.geneontology.org/amigo/term/GO:0002237	-0.3738	-0.775216	0.789292	0.810403	3	ENSG00000078401
GO:0007369	gastrulation	http://amigo.geneontology.org/amigo/term/GO:0007369	0.282661	0.560872	0.939394	0.956803	3	ENSG00000144810;ENSG00000204262
GO:0007492	endoderm development	http://amigo.geneontology.org/amigo/term/GO:0007492	0.282661	0.560872	0.939394	0.956803	3	ENSG00000144810;ENSG00000204262
GO:0060348	bone development	http://amigo.geneontology.org/amigo/term/GO:0060348	0.532002	1.11678	0.328358	1	3	ENSG00000108821;ENSG00000114439
GO:0006909	phagocytosis	http://amigo.geneontology.org/amigo/term/GO:0006909	0.461538	0.992151	0.481651	1	3	ENSG00000100345;ENSG00000115935;ENSG00000129219
GO:0043062	extracellular structure organization	http://amigo.geneontology.org/amigo/term/GO:0043062	0.338862	0.882644	0.576441	1	5	ENSG00000108821;ENSG00000144810;ENSG00000182492;ENSG00000204262
GO:0001503	ossification	http://amigo.geneontology.org/amigo/term/GO:0001503	0.25	0.647292	0.896725	1	5	ENSG00000108821;ENSG00000125378;ENSG00000130522;ENSG00000196923;ENSG00000204262

## Sheet: Panther
geneSet	description	link	size	overlap	expect	enrichmentRatio	pValue	FDR	overlapId	userId
P00034	Integrin signalling pathway	http://www.pantherdb.org/pathway/pathwayDiagram.jsp?catAccession=P00034	166	4	0.879082	4.5502	0.00862991	1	1277;1290;1296;1295	ENSG00000144810;ENSG00000171812;ENSG00000108821;ENSG00000204262
P00052	TGF-beta signaling pathway	http://www.pantherdb.org/pathway/pathwayDiagram.jsp?catAccession=P00052	91	2	0.481906	4.15018	0.0810575	1	652;3727	ENSG00000130522;ENSG00000125378
P00017	DNA replication	http://www.pantherdb.org/pathway/pathwayDiagram.jsp?catAccession=P00017	19	1	0.100618	9.9386	0.0963283	1	440093	ENSG00000188375
P00032	Insulin/IGF pathway-mitogen activated protein kinase kinase/MAP kinase cascade	http://www.pantherdb.org/pathway/pathwayDiagram.jsp?catAccession=P00032	29	1	0.153575	6.51149	0.143537	1	3480	ENSG00000140443
P00033	Insulin/IGF pathway-protein kinase B signaling cascade	http://www.pantherdb.org/pathway/pathwayDiagram.jsp?catAccession=P00033	35	1	0.185349	5.39524	0.170766	1	3480	ENSG00000140443
P00031	Inflammation mediated by chemokine and cytokine signaling pathway	http://www.pantherdb.org/pathway/pathwayDiagram.jsp?catAccession=P00031	200	2	1.05914	1.88833	0.286733	1	3727;4627	ENSG00000100345;ENSG00000130522
P04393	Ras Pathway	http://www.pantherdb.org/pathway/pathwayDiagram.jsp?catAccession=P04393	70	1	0.370697	2.69762	0.31441	1	5338	ENSG00000129219
P00016	Cytoskeletal regulation by Rho GTPase	http://www.pantherdb.org/pathway/pathwayDiagram.jsp?catAccession=P00016	71	1	0.375993	2.65962	0.318156	1	4627	ENSG00000100345
P00019	Endothelin signaling pathway	http://www.pantherdb.org/pathway/pathwayDiagram.jsp?catAccession=P00019	77	1	0.407767	2.45238	0.340243	1	1906	ENSG00000078401
P00049	Parkinson disease	http://www.pantherdb.org/pathway/pathwayDiagram.jsp?catAccession=P00049	89	1	0.471315	2.12172	0.382462	1	5338	ENSG00000129219
P00044	Nicotinic acetylcholine receptor signaling pathway	http://www.pantherdb.org/pathway/pathwayDiagram.jsp?catAccession=P00044	93	1	0.492498	2.03047	0.395975	1	4627	ENSG00000100345
P00029	Huntington disease	http://www.pantherdb.org/pathway/pathwayDiagram.jsp?catAccession=P00029	129	1	0.683142	1.46382	0.505952	1	23647	ENSG00000132254
P00005	Angiogenesis	http://www.pantherdb.org/pathway/pathwayDiagram.jsp?catAccession=P00005	158	1	0.836717	1.19515	0.580843	1	5338	ENSG00000129219
P00057	Wnt signaling pathway	http://www.pantherdb.org/pathway/pathwayDiagram.jsp?catAccession=P00057	294	1	1.55693	0.64229	0.812124	1	1906	ENSG00000078401

## Sheet: GeneMANIA networks
Function	FDR	Genes in network	Genes in genome
complex of collagen trimers	8.98533e-08	6	19
fibrillar collagen trimer	1.89636e-07	5	10
banded collagen fibril	2.31346e-07	5	11
collagen trimer	3.06699e-07	6	28
collagen-containing extracellular matrix	4.10641e-06	7	80
extracellular matrix structural constituent	0.000545917	5	51
gastrulation	0.000854482	6	110
formation of primary germ layer	0.00307367	5	76
endoderm formation	0.0077155	4	42
growth factor binding	0.00783808	5	96
endoderm development	0.0138642	4	51
extracellular matrix organization	0.0875354	5	164
