# Supplementary material for: Cannabidiol (CBD) modulates the transcriptional profile of ethanol-exposed human dermal fibroblast cells
Source: J Appl Genet. 2024 Oct 28;65(4):773–96. doi: 10.1007/s13353-024-00915-7 (PMC11561130; doi:10.1007/s13353-024-00915-7)
Supplement: Supplementary file 6 — Supplementary file6 (XLSX 21843 KB) [file 13353_2024_915_MOESM6_ESM.xlsx]

## Sheet: EtOH 0.25%_6h
	gene	baseMean	log2FoldChange	lfcSE	stat	pvalue	padj	aK34	aK35	aK36	zK20	zK21
1	ENSG00000159403	284.444	3.1227	0.399036	7.82562	5.0517e-15	2.86431e-11	42.5465	85.7395	79.0975	583.915	630.923
2	ENSG00000115461	183.295	2.40464	0.455198	5.28262	1.27349e-07	0.000361033	78.2306	86.7364	38.5347	382.801	330.172
3	ENSG00000108518	103.596	3.04045	0.610633	4.97917	6.38585e-07	0.000905194	26.0769	11.9636	41.2389	131.409	307.289
4	ENSG00000127241	325.276	1.94474	0.387252	5.02191	5.11604e-07	0.000905194	119.405	120.633	214.307	565.632	606.406
5	ENSG00000172403	146.723	2.24778	0.484884	4.63571	3.55713e-06	0.00337831	30.1943	70.7849	73.6891	298.242	260.705
6	ENSG00000264229	1660.96	1.31002	0.282656	4.63468	3.57493e-06	0.00337831	887.986	1165.46	1076.27	2382.51	2792.57
7	ENSG00000163565	299.534	1.63524	0.357205	4.57787	4.69732e-06	0.00380483	138.619	150.543	197.406	514.211	496.893
8	ENSG00000090621	530.558	1.4135	0.31433	4.49688	6.89567e-06	0.00447908	269.004	355.919	329.911	874.158	823.796
9	ENSG00000115053	3791.48	1.43599	0.319791	4.49038	7.10966e-06	0.00447908	1545.4	2194.33	3019.23	5937.42	6261.02
10	ENSG00000109861	245.879	1.59601	0.365974	4.36098	1.29479e-05	0.00734145	129.012	156.524	122.364	390.8	430.695
11	ENSG00000156976	135.121	-2.18517	0.503946	-4.33612	1.45018e-05	0.007475	223.712	251.237	114.252	47.993	38.4111
12	ENSG00000104738	267.91	1.68164	0.393736	4.27098	1.94618e-05	0.00788203	142.737	98.7001	184.561	490.214	423.34
13	ENSG00000131016	902.037	1.36189	0.316543	4.30238	1.68975e-05	0.00788203	455.659	489.513	715.258	1414.65	1435.11
14	ENSG00000239809	213.737	-2.19935	0.513785	-4.28068	1.86323e-05	0.00788203	481.736	297.097	154.139	89.1299	46.5837
15	ENSG00000067167	167.258	1.73151	0.413488	4.18757	2.81952e-05	0.00999168	68.6234	92.7183	98.0268	303.956	272.964
16	ENSG00000164292	641.681	1.27479	0.304385	4.18807	2.81331e-05	0.00999168	358.214	400.782	467.824	969.001	1012.58
17	ENSG00000105258	512.667	-1.71982	0.428751	-4.01123	6.04033e-05	0.0189005	1144.64	502.473	484.726	263.961	167.538
18	ENSG00000130816	373.78	1.40509	0.35127	4.00003	6.33349e-05	0.0189005	188.028	200.391	285.968	627.337	567.177
19	ENSG00000277791	51.5251	3.05588	0.759346	4.02436	5.71302e-05	0.0189005	4.1174	8.97274	25.0137	122.268	97.2537
20	ENSG00000104611	87.2504	2.18765	0.554288	3.94679	7.92075e-05	0.0224553	19.2145	48.8516	39.2107	167.975	161
21	ENSG00000164283	35.5333	-3.25331	0.828155	-3.92839	8.55178e-05	0.0230898	39.8016	57.8243	68.2807	6.85614	4.90355
22	ENSG00000167670	145.619	1.87966	0.482701	3.89405	9.85827e-05	0.0254075	59.0161	45.8606	104.787	282.245	236.188
23	ENSG00000249992	418.735	-1.35332	0.348512	-3.88314	0.000103118	0.0254207	522.91	666.973	471.205	181.688	250.898
24	ENSG00000111678	183.081	-2.0109	0.524732	-3.83225	0.000126979	0.0298106	448.797	202.385	134.533	70.8468	58.8426
25	ENSG00000213626	61.2765	2.71404	0.709786	3.82374	0.00013144	0.0298106	6.86234	12.9606	35.8305	131.409	119.32
26	ENSG00000167526	600.499	1.35843	0.356622	3.80917	0.000139436	0.0304078	273.121	335.979	497.571	799.883	1095.94
27	ENSG00000166598	2943.43	1.22315	0.327655	3.73304	0.000189186	0.039729	1288.75	1879.29	2586.56	4814.15	4148.4
28	ENSG00000102317	686.195	1.32898	0.356985	3.7228	0.000197027	0.039898	326.647	451.628	503.655	773.601	1375.45
29	ENSG00000138829	53.8886	2.39983	0.651884	3.68137	0.000231982	0.0453565	13.7247	25.9212	19.6054	132.552	77.6395
30	ENSG00000198712	2200.93	1.16833	0.325086	3.59392	0.000325736	0.0615642	995.039	1637.03	1770.57	3780.02	2821.99
31	ENSG00000171812	478.106	-1.62455	0.45327	-3.58407	0.000338282	0.0618728	985.432	702.864	277.855	210.255	214.122
32	ENSG00000149948	310.154	-1.3143	0.372656	-3.52685	0.000420531	0.0737938	306.06	404.77	511.767	156.549	171.624
33	ENSG00000150347	489.839	1.16082	0.329658	3.52127	0.000429488	0.0737938	345.862	374.861	263.658	663.903	800.913
34	ENSG00000064042	89.6918	2.13797	0.612504	3.49054	0.000482054	0.0803896	35.6842	15.9515	61.5203	204.542	130.761
35	ENSG00000068308	294.556	-1.29175	0.373142	-3.46182	0.000536527	0.0844843	437.817	423.713	296.785	137.123	177.345
36	ENSG00000152465	378.5	1.32363	0.382079	3.46428	0.000531662	0.0844843	166.069	334.982	207.546	615.91	567.995
37	ENSG00000177352	159.225	-1.84	0.532935	-3.45258	0.000555261	0.0844843	312.923	227.309	130.477	90.2725	35.1421
38	ENSG00000187957	150.086	-1.66964	0.484331	-3.44731	0.000566209	0.0844843	218.222	279.152	123.041	71.9895	58.0253
39	ENSG00000172037	73.0122	1.85158	0.540068	3.42842	0.000607106	0.0882639	38.4291	35.8909	33.1263	115.412	142.203
40	ENSG00000095752	179.8	-1.54966	0.453139	-3.41984	0.000626581	0.0888178	299.198	286.131	147.378	78.8456	87.4466
41	ENSG00000144810	854.205	-1.31507	0.389984	-3.37211	0.000745939	0.0983598	1594.81	1129.57	644.273	537.065	365.314
42	ENSG00000173706	68.1657	2.42707	0.718495	3.37799	0.000730177	0.0983598	4.1174	38.8819	30.4221	126.839	140.568
43	ENSG00000196639	74.1695	1.94404	0.575572	3.37758	0.000731272	0.0983598	28.8218	25.9212	48.6754	109.698	157.731
44	ENSG00000228657	384.853	-1.57006	0.466931	-3.3625	0.000772395	0.0995336	741.132	612.14	218.363	202.256	150.376
45	ENSG00000119917	29.5878	2.69774	0.806703	3.34416	0.000825327	0.103991	9.60727	7.97577	10.1407	66.276	53.9391
46	ENSG00000115649	156.862	-1.56223	0.471804	-3.31119	0.000929001	0.114509	255.279	259.212	125.745	69.7041	74.3705
47	ENSG00000084207	1153.28	1.04418	0.317677	3.28692	0.00101291	0.11965	640.942	774.646	1011.37	1423.79	1915.65
48	ENSG00000130255	700.974	1.07985	0.32816	3.29063	0.00099963	0.11965	391.153	476.552	586.133	857.018	1194.01
49	ENSG00000215369	139.543	-1.65652	0.504964	-3.28047	0.00103635	0.119921	253.906	217.34	104.787	68.5614	53.1218
50	ENSG00000177156	448.043	-1.17872	0.363754	-3.24043	0.00119351	0.135344	768.582	554.316	408.332	254.82	254.167
51	ENSG00000170515	312.552	1.19944	0.371257	3.23075	0.00123464	0.137263	211.36	151.54	254.194	430.794	514.873
52	ENSG00000153885	325.68	-1.2888	0.401329	-3.21134	0.00132118	0.14406	518.793	469.573	292.052	131.409	216.573
53	ENSG00000153976	115.864	-1.55531	0.487031	-3.19345	0.00140584	0.144929	148.226	122.627	201.462	45.7076	61.2944
54	ENSG00000197301	438.865	-1.19965	0.374462	-3.20365	0.00135698	0.144929	457.032	438.667	804.496	239.965	254.167
55	ENSG00000215030	386.752	1.22794	0.38407	3.19719	0.00138771	0.144929	166.069	315.043	272.447	700.469	479.731
56	ENSG00000154767	82.8605	1.66297	0.52254	3.18247	0.00146023	0.147848	42.5465	48.8516	41.9149	114.269	166.721
57	ENSG00000111667	359.572	-1.22875	0.387088	-3.17433	0.00150181	0.14939	612.121	466.582	321.122	229.681	168.355
58	ENSG00000079432	538.759	-1.16177	0.376181	-3.08833	0.00201285	0.155997	937.395	696.882	441.459	345.093	272.964
59	ENSG00000080845	806.36	-1.0943	0.351987	-3.10893	0.00187763	0.155997	1391.68	1000.96	680.779	458.219	500.162
60	ENSG00000100292	108.023	-1.71757	0.544415	-3.15489	0.00160559	0.155997	138.619	85.7395	224.448	47.993	43.3147
61	ENSG00000100626	264.308	-1.36465	0.447349	-3.05052	0.00228449	0.155997	480.364	385.828	183.885	149.692	121.771
62	ENSG00000104695	507.792	-1.07053	0.345452	-3.09893	0.00194218	0.155997	739.76	731.776	456.332	294.814	316.279
63	ENSG00000105974	1052.82	0.88122	0.289524	3.04369	0.00233695	0.155997	688.979	804.555	868.044	1576.91	1325.59
64	ENSG00000110651	803.789	-0.876966	0.288748	-3.03714	0.00238838	0.155997	948.375	987.001	1012.72	574.773	496.076
65	ENSG00000116688	137.736	1.41952	0.462818	3.06713	0.00216125	0.155997	111.17	55.8304	81.1256	212.54	228.015
66	ENSG00000116918	62.8221	2.37699	0.777205	3.05838	0.00222537	0.155997	4.1174	16.9485	47.9993	102.842	142.203
67	ENSG00000120802	256.905	1.24077	0.399453	3.10617	0.00189527	0.155997	126.267	232.294	139.942	395.371	390.649
68	ENSG00000122545	458.721	0.955948	0.313671	3.04761	0.00230667	0.155997	319.785	328.003	352.22	602.198	691.401
69	ENSG00000127838	160.13	-1.45955	0.463781	-3.14707	0.00164915	0.155997	293.708	213.352	137.914	73.1322	82.5431
70	ENSG00000134013	120.474	1.47102	0.476296	3.08846	0.00201196	0.155997	49.4088	67.794	93.2945	190.829	201.046
71	ENSG00000142552	39.0253	2.99788	0.968723	3.09467	0.00197033	0.155997	12.3522	0	18.2533	58.2772	106.244
72	ENSG00000151247	168.282	-1.44539	0.464068	-3.11461	0.00184189	0.155997	301.943	239.273	135.209	79.9883	84.9949
73	ENSG00000166741	290.933	1.43274	0.465008	3.08112	0.00206226	0.155997	89.2104	164.5	264.334	347.378	589.243
74	ENSG00000167792	203.803	-1.35508	0.434106	-3.12154	0.00179908	0.155997	369.194	234.288	204.842	125.696	84.9949
75	ENSG00000168297	389.663	1.2822	0.412639	3.10731	0.00188795	0.155997	183.911	171.479	386.023	653.619	553.284
76	ENSG00000174579	137.978	-1.63929	0.5395	-3.03854	0.00237729	0.155997	225.085	257.218	86.534	49.1357	71.9187
77	ENSG00000175305	33.5855	3.00946	0.97786	3.0776	0.00208677	0.155997	1.37247	2.99091	20.9575	67.4187	75.1878
78	ENSG00000177600	2170.79	-0.862288	0.284299	-3.03303	0.00242112	0.155997	3100.4	2683.84	2157.94	1494.64	1417.13
79	ENSG00000187840	307.364	-1.18563	0.384261	-3.08549	0.00203219	0.155997	538.007	344.952	306.249	164.547	183.066
80	ENSG00000196549	220.647	1.2334	0.403645	3.05566	0.00224565	0.155997	120.777	116.646	191.321	310.812	363.68
81	ENSG00000196923	3120.77	-1.04911	0.341774	-3.06959	0.00214353	0.155997	5351.25	4026.76	2424.3	2036.27	1765.28
82	ENSG00000198225	201.114	-1.38672	0.450901	-3.07545	0.00210185	0.155997	359.586	285.134	156.843	110.841	93.1675
83	ENSG00000198242	1609.19	0.833191	0.270075	3.08504	0.00203526	0.155997	1184.44	1290.08	1203.36	2039.7	2328.37
84	ENSG00000227836	2655.99	-1.2654	0.405455	-3.12094	0.00180275	0.155997	4844.81	4051.69	1500.82	1524.35	1358.28
85	ENSG00000228224	2225.01	-1.19772	0.3935	-3.04377	0.00233632	0.155997	4080.35	3142.45	1397.39	1431.79	1073.06
86	ENSG00000230629	559.113	-1.44583	0.475893	-3.03813	0.00238051	0.155997	1210.52	756.701	279.207	298.242	250.898
87	ENSG00000232128	1954.41	-1.25328	0.401426	-3.12207	0.00179587	0.155997	3668.61	2737.68	1230.41	1264.96	870.38
88	ENSG00000278487	332.636	-1.48381	0.489076	-3.0339	0.00241417	0.155997	720.545	444.649	178.476	157.691	161.817
89	ENSG00000123200	574.283	0.971463	0.321103	3.02539	0.00248309	0.156435	329.392	483.531	430.642	860.446	767.406
90	ENSG00000132963	730.958	-1.03162	0.340832	-3.02676	0.00247187	0.156435	1133.66	989.992	632.78	485.643	412.715
91	ENSG00000135698	243.844	1.10161	0.365805	3.01147	0.0025999	0.161994	194.89	150.543	156.843	345.093	371.853
92	ENSG00000071462	143.565	1.42028	0.474218	2.99499	0.00274458	0.164751	61.761	122.627	73.0131	270.818	189.604
93	ENSG00000102390	77.9038	1.8774	0.625531	3.00129	0.00268842	0.164751	15.0971	37.8849	58.8161	114.269	163.452
94	ENSG00000196743	35.3214	2.48264	0.828219	2.99756	0.00272148	0.164751	10.9797	4.98485	20.9575	51.4211	88.2639
95	ENSG00000225482	370.337	-1.37446	0.45919	-2.99323	0.00276037	0.164751	743.877	511.446	218.363	179.402	198.594
96	ENSG00000225443	470.125	-1.28244	0.428932	-2.98984	0.00279122	0.164857	808.383	744.737	292.728	222.825	281.954
97	ENSG00000125534	916.744	1.43748	0.482089	2.98178	0.00286583	0.166844	282.728	332.988	1016.1	1038.71	1913.2
98	ENSG00000160539	121.382	-2.00019	0.671736	-2.97765	0.00290471	0.166844	275.866	204.379	40.5628	29.71	56.3908
99	ENSG00000163191	901.034	-0.972003	0.327778	-2.96543	0.00302256	0.166844	1255.81	1297.06	810.58	499.356	642.365
100	ENSG00000165092	35.1043	2.53777	0.852728	2.97606	0.00291981	0.166844	4.1174	22.9303	8.78861	51.4211	88.2639
101	ENSG00000184009	8570.33	-0.992601	0.33456	-2.96688	0.00300835	0.166844	14050	11468.2	6579.96	5886	4867.59
102	ENSG00000243680	865.339	-1.17713	0.397063	-2.96459	0.00303085	0.166844	1572.85	1188.39	580.724	556.49	428.243
103	ENSG00000256464	503.374	-1.19944	0.403825	-2.97018	0.00297622	0.166844	787.796	815.522	348.164	249.107	316.279
104	ENSG00000165912	178.155	-1.41808	0.47887	-2.9613	0.00306342	0.167016	295.081	295.103	123.041	92.5579	84.9949
105	ENSG00000132388	148.449	-1.53712	0.520104	-2.95541	0.00312251	0.168615	315.668	183.443	104.787	75.4176	62.9289
106	ENSG00000120913	120.045	-1.78107	0.606908	-2.93467	0.00333907	0.172114	168.814	272.173	62.1963	36.5661	60.4771
107	ENSG00000125520	92.3629	1.49546	0.50924	2.93665	0.00331775	0.172114	59.0161	39.8788	61.5203	131.409	169.99
108	ENSG00000136819	203.566	1.35976	0.461664	2.94534	0.00322603	0.172114	72.7408	107.673	193.349	330.238	313.827
109	ENSG00000168610	463.417	1.17696	0.400315	2.94008	0.00328132	0.172114	179.793	288.125	454.304	659.332	735.533
110	ENSG00000216412	1994.21	-1.14343	0.388854	-2.94051	0.00327669	0.172114	3624.69	2784.54	1251.36	1070.7	1239.78
111	ENSG00000109113	695.132	-1.1	0.37608	-2.92492	0.0034455	0.172885	1258.55	849.419	544.218	380.516	442.954
112	ENSG00000148296	77.7593	1.75229	0.598768	2.92649	0.0034281	0.172885	19.2145	37.8849	61.5203	133.695	136.482
113	ENSG00000161016	8884.34	-1.07411	0.366937	-2.92723	0.00341992	0.172885	15493.8	12406.3	5839.69	4934.14	5747.78
114	ENSG00000105559	90.7934	1.72903	0.594524	2.90826	0.00363445	0.17765	23.3319	72.7789	44.6191	204.542	108.695
115	ENSG00000105677	693.632	-1.09277	0.375655	-2.90898	0.00362608	0.17765	1310.71	718.816	613.851	373.66	451.127
116	ENSG00000240038	3031.57	-1.10636	0.380085	-2.91083	0.00360474	0.17765	5260.67	4377.7	1936.87	1580.34	2002.28
117	ENSG00000124496	75.4769	1.63136	0.562403	2.9007	0.00372331	0.179243	42.5465	26.9182	53.4077	113.126	141.386
118	ENSG00000159335	1853.39	0.804982	0.277823	2.89747	0.0037619	0.179243	1276.39	1562.25	1441.33	2749.31	2237.65
119	ENSG00000197045	116.016	-1.5118	0.521439	-2.8993	0.00374002	0.179243	208.615	141.57	119.66	74.2749	35.9594
120	ENSG00000011451	110.372	-1.52622	0.528096	-2.89004	0.00385188	0.179834	182.538	183.443	82.4777	50.2784	53.1218
121	ENSG00000131473	236.429	-1.16646	0.403813	-2.88861	0.00386944	0.179834	317.04	383.834	210.927	131.409	138.934
122	ENSG00000264316	1102	-1.14718	0.396436	-2.89374	0.00380689	0.179834	2087.52	1434.64	713.906	636.479	637.462
123	ENSG00000235137	319.389	-1.41415	0.491559	-2.87688	0.00401634	0.185144	661.529	417.731	198.082	212.54	107.061
124	ENSG00000113141	471.171	1.33238	0.463879	2.87226	0.00407551	0.186356	150.971	208.367	517.852	827.308	651.355
125	ENSG00000165632	129.055	1.41901	0.496356	2.85886	0.0042517	0.191104	52.1538	62.8091	115.604	230.823	183.883
126	ENSG00000204104	66.6098	1.69602	0.593128	2.85945	0.00424373	0.191104	23.3319	33.897	47.3233	133.695	94.802
127	ENSG00000204599	89.2181	-1.48604	0.520192	-2.85672	0.00428046	0.191104	129.012	141.57	89.9142	42.2795	43.3147
128	ENSG00000184900	604.021	-1.07982	0.379097	-2.84841	0.00439388	0.194635	993.666	856.398	446.867	332.523	390.649
129	ENSG00000126870	69.3597	2.10951	0.741671	2.84427	0.00445131	0.195651	8.23481	16.9485	62.8724	127.981	130.761
130	ENSG00000101236	160.948	1.22339	0.431977	2.83207	0.00462484	0.198658	90.5829	89.7274	133.857	210.255	280.32
131	ENSG00000136938	1086.49	1.02286	0.360842	2.83464	0.00458767	0.198658	494.088	687.91	1122.91	1623.76	1503.76
132	ENSG00000168487	348.458	-1.21046	0.427399	-2.83215	0.00462356	0.198658	568.202	554.316	230.532	204.542	184.7
133	ENSG00000101194	44.8567	-1.93002	0.683584	-2.82338	0.00475197	0.201093	56.2712	68.791	65.5765	20.5684	13.0761
134	ENSG00000109332	994.398	-0.972973	0.345197	-2.8186	0.00482339	0.201093	1446.58	1469.53	796.383	559.918	699.573
135	ENSG00000167535	264.84	-1.11793	0.396485	-2.81962	0.0048081	0.201093	371.939	413.743	227.828	149.692	161
136	ENSG00000226110	465.238	-1.30146	0.461724	-2.8187	0.00482182	0.201093	896.221	660.992	273.799	315.383	179.797
137	ENSG00000056586	141.399	-1.27579	0.453906	-2.81069	0.00494355	0.202319	149.599	242.264	162.251	83.4164	69.467
138	ENSG00000126012	113.505	-1.41218	0.503077	-2.80709	0.00499909	0.202319	178.421	170.482	104.787	69.7041	44.132
139	ENSG00000169871	194.772	1.32216	0.471307	2.80531	0.00502687	0.202319	59.0161	135.588	169.012	317.668	292.578
140	ENSG00000170469	91.9949	-1.67275	0.59634	-2.80503	0.00503123	0.202319	197.635	123.624	59.4921	39.9942	39.2284
141	ENSG00000224555	30.8533	-2.532	0.901858	-2.80753	0.00499225	0.202319	74.1132	43.8667	20.2814	10.2842	5.72081
142	ENSG00000072571	57.6906	1.64796	0.595958	2.76523	0.0056882	0.202369	24.7044	33.897	34.4784	89.1299	106.244
143	ENSG00000092199	337.611	0.996667	0.359798	2.77007	0.00560435	0.202369	211.36	309.061	204.166	444.507	518.959
144	ENSG00000100097	24914.1	-0.978661	0.351765	-2.78214	0.00540016	0.202369	43209.4	32348.7	17524.5	14592.2	16896
145	ENSG00000100644	1193.35	-0.981166	0.35543	-2.76051	0.00577119	0.202369	1953.02	1626.06	882.241	740.463	764.954
146	ENSG00000110696	414.075	1.2051	0.434645	2.77261	0.00556084	0.202369	258.024	167.491	390.079	411.369	843.411
147	ENSG00000116729	169.131	-1.11715	0.402086	-2.77838	0.0054631	0.202369	234.692	209.364	202.814	103.985	94.802
148	ENSG00000119812	742.704	-1.10154	0.398725	-2.76265	0.00573341	0.202369	1207.77	1144.52	481.345	492.5	387.38
149	ENSG00000125354	192.795	-1.14794	0.409722	-2.80176	0.0050825	0.202369	296.453	255.224	189.969	100.557	121.771
150	ENSG00000128710	357.182	-1.21223	0.437004	-2.77396	0.00553776	0.202369	717.801	419.725	250.137	193.115	205.132
151	ENSG00000131437	76.0502	1.81784	0.658855	2.75909	0.00579619	0.202369	10.9797	41.8728	59.4921	119.982	147.924
152	ENSG00000155366	185.723	1.21516	0.435049	2.79315	0.00521969	0.202369	78.2306	136.585	148.73	242.25	322.817
153	ENSG00000159167	1215.47	-1.26349	0.454028	-2.78285	0.00538839	0.202369	835.833	1002.95	2917.14	585.057	736.35
154	ENSG00000164649	62.8793	1.59759	0.578592	2.76117	0.00575949	0.202369	31.5668	42.8697	29.7461	115.412	94.802
155	ENSG00000169062	56.8221	1.79818	0.649712	2.76765	0.00564617	0.202369	20.587	18.9424	45.2951	97.1287	102.157
156	ENSG00000170162	37.7082	-2.26512	0.817866	-2.76955	0.00561345	0.202369	90.5829	45.8606	29.07	14.855	8.17258
157	ENSG00000172954	78.6953	-1.79141	0.648884	-2.76075	0.00576689	0.202369	139.992	149.546	40.5628	33.138	30.2386
158	ENSG00000176014	553.203	-1.00026	0.358438	-2.7906	0.00526104	0.202369	837.205	772.652	465.796	300.528	389.832
159	ENSG00000211448	65.9901	1.59855	0.57963	2.75788	0.00581767	0.202369	37.0566	46.8576	25.6898	116.554	103.792
160	ENSG00000213791	2754.98	-1.16737	0.417009	-2.79939	0.00511985	0.202369	5127.54	4015.8	1479.87	1370.09	1781.62
161	ENSG00000231767	207.981	-1.43878	0.52048	-2.76433	0.00570397	0.202369	400.761	329	105.463	95.986	108.695
162	ENSG00000233730	40.8619	-2.35735	0.848816	-2.77722	0.00548264	0.202369	112.542	30.9061	37.1826	17.1404	6.53807
163	ENSG00000242137	213.84	-1.55205	0.56139	-2.76466	0.00569818	0.202369	426.837	348.94	95.3226	130.267	67.8324
164	ENSG00000133816	160.537	-1.34324	0.487817	-2.75358	0.00589471	0.202564	311.55	188.427	136.561	63.9907	102.157
165	ENSG00000156030	56.7209	1.6614	0.603113	2.75471	0.00587447	0.202564	26.0769	35.8909	29.07	110.841	81.7258
166	ENSG00000138032	86.8425	-1.67732	0.609919	-2.75007	0.00595817	0.203511	170.186	131.6	57.464	47.993	26.9695
167	ENSG00000009413	179.031	1.11659	0.408155	2.7357	0.00622474	0.203923	97.4452	124.621	143.322	238.822	290.944
168	ENSG00000104973	224.704	-1.14373	0.416604	-2.74538	0.00604412	0.203923	365.076	308.064	190.645	119.982	139.751
169	ENSG00000107833	208.007	-1.32611	0.484909	-2.73476	0.00624261	0.203923	367.821	326.009	128.449	95.986	121.771
170	ENSG00000131043	70.1509	-1.6108	0.588636	-2.73649	0.00620985	0.203923	63.1335	100.694	123.717	35.4234	27.7868
171	ENSG00000157613	446.123	0.868664	0.318171	2.73018	0.0063299	0.203923	370.566	331.991	304.221	578.201	645.634
172	ENSG00000164171	291.343	-1.37897	0.503186	-2.74048	0.00613501	0.203923	201.753	251.237	705.793	156.549	141.386
173	ENSG00000177666	269.968	-1.11122	0.40666	-2.73256	0.00628433	0.203923	432.327	372.867	226.476	181.688	136.482
174	ENSG00000185825	145.136	1.37027	0.501732	2.73109	0.00631259	0.203923	60.3886	76.7667	128.449	157.691	302.386
175	ENSG00000240371	1106.82	-1.06447	0.388909	-2.73706	0.00619909	0.203923	1758.13	1744.7	694.3	674.187	662.797
176	ENSG00000242327	97.12	-1.72849	0.632318	-2.73357	0.00626511	0.203923	216.85	139.576	47.9993	46.8503	34.3249
177	ENSG00000214047	846.502	-1.16834	0.428607	-2.7259	0.00641264	0.205422	1667.55	1112.62	484.726	522.21	445.406
178	ENSG00000028277	138.529	-1.55987	0.574251	-2.71635	0.00660062	0.205831	91.9553	141.57	330.587	81.131	47.401
179	ENSG00000102316	1327.25	-0.96223	0.354006	-2.71812	0.00656538	0.205831	2164.38	1763.64	1016.77	963.288	728.177
180	ENSG00000198832	109.996	1.52525	0.561571	2.71603	0.00660691	0.205831	35.6842	48.8516	102.759	137.123	225.563
181	ENSG00000224074	62.2105	-2.02794	0.744784	-2.72286	0.00647189	0.205831	122.15	121.63	23.6616	23.9965	19.6142
182	ENSG00000253558	88.0254	-1.59012	0.585318	-2.71668	0.00659402	0.205831	182.538	114.652	63.5484	37.7088	41.6802
183	ENSG00000112773	408.045	-0.948248	0.349502	-2.71314	0.00666487	0.205913	634.08	491.507	391.431	255.963	267.243
184	ENSG00000167378	118.715	-1.37016	0.50517	-2.71228	0.0066822	0.205913	144.109	215.346	112.9	46.8503	74.3705
185	ENSG00000139329	1487.79	-1.14268	0.42185	-2.70874	0.0067539	0.206998	3015.31	1860.35	838.974	854.732	869.563
186	ENSG00000196199	201.133	1.03823	0.383706	2.7058	0.00681394	0.207715	145.482	120.633	158.195	287.958	293.396
187	ENSG00000065534	526.195	0.873421	0.324175	2.69429	0.00705396	0.207956	328.02	373.864	481.345	718.752	728.994
188	ENSG00000157227	2110.21	-0.806675	0.299285	-2.69534	0.0070317	0.207956	2851.99	2892.21	1895.64	1541.49	1369.72
189	ENSG00000173511	166.984	-1.29156	0.478866	-2.69712	0.00699413	0.207956	295.081	238.276	123.041	101.699	76.8223
190	ENSG00000196396	781.597	-0.907399	0.33701	-2.6925	0.00709178	0.207956	1210.52	1010.93	662.526	516.496	507.517
191	ENSG00000213741	176.687	1.20244	0.446772	2.6914	0.00711524	0.207956	85.093	94.7122	167.66	243.393	292.578
192	ENSG00000226080	146.915	-1.64267	0.608786	-2.69828	0.00696995	0.207956	290.963	256.221	58.8161	46.8503	81.7258
193	ENSG00000240950	327.569	-1.23044	0.455531	-2.70111	0.00691087	0.207956	609.376	454.619	211.603	221.682	140.568
194	ENSG00000289942	276.537	-0.975647	0.360925	-2.70319	0.00686783	0.207956	286.846	347.943	397.516	171.404	178.98
195	ENSG00000198034	1304.9	-0.801418	0.298108	-2.68835	0.00718063	0.208251	1619.51	1862.34	1237.84	905.011	899.801
196	ENSG00000275052	332.912	-1.24639	0.463774	-2.68751	0.00719878	0.208251	620.355	492.503	187.265	174.832	189.604
197	ENSG00000150760	129.461	1.33369	0.496806	2.68454	0.00726302	0.208492	109.797	47.8546	84.5059	165.69	239.457
198	ENSG00000183605	45.4799	-1.90149	0.708528	-2.68373	0.00728067	0.208492	89.2104	61.8122	41.9149	20.5684	13.8934
199	ENSG00000131507	458.298	-1.0173	0.379374	-2.68153	0.00732865	0.208811	738.388	633.076	352.896	292.529	274.599
200	ENSG00000115414	7307.23	0.725981	0.271769	2.67131	0.00755548	0.213132	6063.56	6116.41	5196.1	10951.5	8208.54
201	ENSG00000240163	91.4951	-1.96939	0.736941	-2.67238	0.00753145	0.213132	175.676	189.424	26.3658	19.4257	46.5837
202	ENSG00000092203	116.382	1.19165	0.448301	2.65814	0.00785729	0.220549	71.3683	80.7546	78.4214	169.118	182.249
203	ENSG00000108107	1503.75	-0.886574	0.335204	-2.64488	0.00817203	0.226825	2351.04	1994.94	1181.05	975.858	1015.85
204	ENSG00000163382	875.113	-0.968583	0.36629	-2.64431	0.00818588	0.226825	1498.73	1111.62	654.413	525.638	585.157
205	ENSG00000181904	67.7387	-1.77799	0.672544	-2.64368	0.00820091	0.226825	133.129	113.655	37.1826	22.8538	31.8731
206	ENSG00000147274	425.237	-0.886931	0.335718	-2.6419	0.00824432	0.226919	592.906	443.652	525.964	317.668	245.995
207	ENSG00000092201	907.577	0.795876	0.302186	2.63372	0.00844539	0.230091	564.084	814.525	724.046	1170.11	1265.12
208	ENSG00000116649	339.886	-0.945684	0.359077	-2.63365	0.00844716	0.230091	403.505	454.619	403.6	268.532	169.172
209	ENSG00000227051	84.5297	1.49823	0.569175	2.63228	0.00848132	0.230091	41.174	33.897	70.9849	101.699	174.893
210	ENSG00000134597	42.992	2.19389	0.834968	2.62751	0.00860114	0.232231	5.48987	9.96971	36.5065	101.699	61.2944
211	ENSG00000241553	1122.98	-0.742659	0.282999	-2.62424	0.00868416	0.233361	1493.24	1331.95	1190.52	788.456	810.72
212	ENSG00000115307	370.035	-0.898684	0.344228	-2.61072	0.0090351	0.234995	459.777	528.394	375.206	222.825	263.974
213	ENSG00000116005	304.3	0.914955	0.349727	2.6162	0.00889148	0.234995	212.732	198.397	262.306	446.792	401.274
214	ENSG00000134313	77.4984	1.69766	0.650126	2.61128	0.00902044	0.234995	13.7247	37.8849	69.6328	137.123	129.127
215	ENSG00000140564	385.365	-1.13544	0.434362	-2.61403	0.00894805	0.234995	702.703	533.379	242.701	238.822	209.218
216	ENSG00000144559	66.0314	-1.54897	0.592385	-2.61481	0.00892776	0.234995	113.915	77.7637	77.0693	37.7088	23.7005
217	ENSG00000160799	65.7728	1.66947	0.638818	2.61337	0.00896548	0.234995	15.0971	53.8364	35.8305	121.125	102.975
218	ENSG00000186918	36.5724	1.92264	0.735867	2.61275	0.00898164	0.234995	13.7247	23.9273	14.197	58.2772	72.736
219	ENSG00000078369	1420.45	-0.90002	0.345263	-2.60677	0.00914019	0.235814	2239.87	1925.15	1068.83	895.869	972.537
220	ENSG00000126062	113.279	-1.37081	0.525937	-2.60641	0.00914976	0.235814	203.125	154.53	92.6184	71.9895	44.132
221	ENSG00000102225	589.356	-0.974413	0.374087	-2.60478	0.00919338	0.235866	971.707	788.604	440.783	365.661	380.025
222	ENSG00000125651	273.389	1.03277	0.397208	2.60008	0.00932032	0.238046	183.911	161.509	231.884	502.784	286.858
223	ENSG00000100345	14951.4	-0.929732	0.359133	-2.58882	0.00963048	0.239761	25435.9	20060	9881.78	10100.2	9279.15
224	ENSG00000129219	170.443	-1.31178	0.506783	-2.58844	0.00964119	0.239761	340.372	215.346	116.956	70.8468	108.695
225	ENSG00000133612	225.651	-1.0626	0.409631	-2.59404	0.00948564	0.239761	323.902	335.979	196.054	121.125	151.193
226	ENSG00000163064	110.406	-1.48862	0.574609	-2.59067	0.00957883	0.239761	247.044	125.618	73.6891	58.2772	47.401
227	ENSG00000167881	78.0974	-1.56205	0.603467	-2.58845	0.00964087	0.239761	133.129	133.594	52.0556	36.5661	35.1421
228	ENSG00000169439	103.719	-1.47288	0.568991	-2.58858	0.00963728	0.239761	204.498	148.549	65.5765	46.8503	53.1218
229	ENSG00000117411	952.106	-1.05789	0.409376	-2.58415	0.00976192	0.24017	1804.79	1207.33	594.921	506.212	647.269
230	ENSG00000198682	408.442	0.880731	0.34104	2.58249	0.00980907	0.24017	249.789	365.888	300.841	506.212	619.482
231	ENSG00000235379	795.604	-1.17187	0.453888	-2.58186	0.00982706	0.24017	1546.77	1137.54	386.023	481.073	426.609
232	ENSG00000270992	213.734	-1.24871	0.483524	-2.58252	0.0098083	0.24017	422.72	277.158	135.209	119.982	113.599
233	ENSG00000106080	217.322	1.2136	0.471085	2.57618	0.00998976	0.241062	65.8784	156.524	202.814	327.952	333.441
234	ENSG00000184983	207.109	-1.08254	0.419945	-2.57782	0.00994268	0.241062	248.417	336.976	202.814	99.4141	147.924
235	ENSG00000197766	39.443	1.79274	0.695902	2.57614	0.00999112	0.241062	16.4696	21.9334	20.9575	76.5603	61.2944
236	ENSG00000058668	429.944	0.950677	0.37056	2.56552	0.0103022	0.242815	290.963	231.297	416.445	507.355	703.659
237	ENSG00000141469	171.908	-1.03672	0.403982	-2.56624	0.0102807	0.242815	189.401	222.324	236.616	113.126	98.071
238	ENSG00000164609	207.762	1.05214	0.409619	2.56859	0.0102113	0.242815	133.129	110.664	191.321	329.095	274.599
239	ENSG00000175104	39.0929	-2.21186	0.862358	-2.56489	0.0103207	0.242815	57.6436	92.7183	20.2814	18.283	6.53807
240	ENSG00000182492	974.225	-0.940574	0.366562	-2.56594	0.0102898	0.242815	1612.65	1294.07	709.173	691.328	563.908
241	ENSG00000236913	813.586	-1.17267	0.457128	-2.56531	0.0103084	0.242815	1586.57	1166.46	387.375	427.366	500.162
242	ENSG00000035862	1515.03	-0.808539	0.315589	-2.562	0.0104072	0.243502	2145.17	2060.74	1281.78	990.713	1096.76
243	ENSG00000175215	94.9497	-1.3848	0.540715	-2.56104	0.0104358	0.243502	156.461	147.552	74.3652	51.4211	44.9492
244	ENSG00000154188	60.6717	1.7396	0.680555	2.55615	0.0105839	0.243945	12.3522	47.8546	33.1263	134.837	75.1878
245	ENSG00000197157	566.805	-0.989777	0.386968	-2.55778	0.0105344	0.243945	995.039	708.846	418.473	383.944	327.721
246	ENSG00000244053	339.474	-1.29251	0.505548	-2.55665	0.0105687	0.243945	612.121	550.328	171.716	242.25	120.954
247	ENSG00000133895	151.21	-1.31285	0.514448	-2.55196	0.010712	0.245898	255.279	249.243	91.9424	81.131	78.4568
248	ENSG00000172379	158.131	-1.3468	0.528097	-2.55029	0.0107632	0.246079	308.805	218.337	99.3789	102.842	61.2944
249	ENSG00000080824	7809.63	0.725421	0.28475	2.54757	0.0108475	0.24701	5253.81	5695.69	7623.78	9191.8	11283.1
250	ENSG00000164054	127.226	-1.17122	0.460082	-2.54568	0.0109066	0.247361	189.401	169.485	132.505	60.5626	84.1776
251	ENSG00000136933	29.5091	-2.0815	0.818839	-2.54202	0.0110214	0.24897	38.4291	51.8425	37.1826	10.2842	9.8071
252	ENSG00000230989	352.703	-0.91338	0.359826	-2.53839	0.0111364	0.250568	510.558	472.564	319.77	239.965	220.66
253	ENSG00000058262	1983.55	-0.962572	0.380313	-2.531	0.0113738	0.252207	3379.02	2774.57	1237.17	1234.11	1292.9
254	ENSG00000160789	662.814	-0.859729	0.339448	-2.53273	0.0113179	0.252207	1076.01	731.776	616.555	463.932	425.792
255	ENSG00000164114	111.829	1.42973	0.564978	2.53059	0.0113871	0.252207	31.5668	54.8334	112.224	166.833	193.69
256	ENSG00000175749	170.675	-1.40527	0.554501	-2.53429	0.0112676	0.252207	363.704	234.288	84.5059	71.9895	98.8883
257	ENSG00000206418	354.574	-1.08819	0.430533	-2.52754	0.0114865	0.253417	625.845	491.507	233.236	188.544	233.736
258	ENSG00000130402	409.089	0.915224	0.364108	2.5136	0.0119505	0.260612	237.437	281.146	386.023	674.187	466.655
259	ENSG00000151353	180.415	1.0838	0.430848	2.5155	0.0118865	0.260612	127.639	88.7304	156.843	307.384	221.477
260	ENSG00000242706	236.776	-1.2821	0.510055	-2.51365	0.011949	0.260612	511.93	285.134	132.505	143.979	110.33
261	ENSG00000071575	228.57	-1.18459	0.472888	-2.50502	0.0122446	0.261351	336.255	407.761	139.942	137.123	121.771
262	ENSG00000073712	211.267	1.09622	0.437916	2.50327	0.0123052	0.261351	120.777	98.7001	214.983	298.242	323.634
263	ENSG00000114270	152.31	-1.2743	0.508497	-2.50602	0.0122099	0.261351	133.129	137.582	325.855	79.9883	84.9949
264	ENSG00000130227	546.94	-0.957511	0.382512	-2.50322	0.012307	0.261351	956.61	659.995	419.825	377.088	321.183
265	ENSG00000143793	49.8206	1.7695	0.704897	2.51029	0.0120631	0.261351	10.9797	31.9031	32.4503	110.841	62.9289
266	ENSG00000165527	361.442	-1.06677	0.425309	-2.50824	0.0121336	0.261351	599.768	521.416	250.813	173.689	261.523
267	ENSG00000204262	3434.35	-0.937329	0.373762	-2.50782	0.0121478	0.261351	5876.91	4619.96	2241.1	2534.49	1899.31
268	ENSG00000088832	427.008	-0.914236	0.365522	-2.50118	0.0123782	0.261882	392.526	466.582	717.286	279.959	278.685
269	ENSG00000050405	546.362	0.764257	0.306295	2.49517	0.0125897	0.263375	430.955	424.709	425.233	798.741	652.172
270	ENSG00000104388	705.81	-0.912215	0.36553	-2.4956	0.0125745	0.263375	1029.35	1033.86	542.866	534.779	388.198
271	ENSG00000113460	179.588	1.21183	0.486704	2.48987	0.0127788	0.263375	57.6436	177.461	116.956	292.529	253.35
272	ENSG00000118181	136.925	1.15401	0.463694	2.48872	0.0128204	0.263375	78.2306	68.791	127.773	207.97	201.863
273	ENSG00000120686	119.651	-1.30385	0.522725	-2.49433	0.0126197	0.263375	205.87	179.455	85.858	73.1322	53.9391
274	ENSG00000140943	296.471	-1.10091	0.441954	-2.49102	0.0127378	0.263375	459.777	476.552	194.702	203.399	147.924
275	ENSG00000175203	765.96	-0.931838	0.374009	-2.49148	0.0127211	0.263375	1324.43	956.095	558.415	494.785	496.076
276	ENSG00000230175	642.428	-1.06696	0.428073	-2.49248	0.0126853	0.263375	1089.74	972.046	375.206	460.504	314.644
277	ENSG00000159140	1849.7	-0.849261	0.341699	-2.4854	0.0129405	0.264883	3072.95	2245.18	1433.22	1312.95	1184.21
278	ENSG00000102910	159.589	1.21536	0.490387	2.47836	0.0131988	0.266325	68.6234	76.7667	166.308	269.675	216.573
279	ENSG00000116171	54.4302	1.65765	0.667857	2.48204	0.0130633	0.266325	20.587	28.9121	37.8586	54.8491	129.944
280	ENSG00000227081	767.879	-0.788697	0.318099	-2.47941	0.01316	0.266325	1089.74	969.055	711.877	575.916	492.807
281	ENSG00000230359	100.142	-1.39957	0.564256	-2.48039	0.013124	0.266325	201.753	121.63	76.3933	61.7053	39.2284
282	ENSG00000101057	32.6024	2.31579	0.935774	2.47474	0.0133335	0.267219	2.74494	6.97879	27.0419	78.8456	47.401
283	ENSG00000132842	120.508	1.4451	0.584571	2.47206	0.0134337	0.267219	56.2712	33.897	123.041	135.98	253.35
284	ENSG00000163430	362.758	0.996431	0.40325	2.471	0.0134735	0.267219	150.971	306.07	319.77	602.198	434.781
285	ENSG00000170961	70.974	-1.45163	0.587498	-2.47086	0.0134788	0.267219	59.0161	109.667	116.28	38.8515	31.0558
286	ENSG00000228519	107.973	-1.4063	0.568729	-2.47271	0.0134091	0.267219	214.105	150.543	66.9286	61.7053	46.5837
287	ENSG00000100342	30.2023	2.62167	1.0626	2.46723	0.0136164	0.268072	0	23.9273	5.40838	74.2749	47.401
288	ENSG00000138835	84.1062	-1.41715	0.574131	-2.46834	0.013574	0.268072	149.599	125.618	61.5203	44.5649	39.2284
289	ENSG00000132912	186.272	-1.21727	0.494238	-2.46293	0.0137808	0.268513	293.708	309.061	121.012	129.124	78.4568
290	ENSG00000137285	556.236	-1.029	0.417508	-2.46462	0.0137157	0.268513	1045.82	691.898	359.657	311.954	371.853
291	ENSG00000230360	62.1955	-1.88177	0.763709	-2.46399	0.0137399	0.268513	179.793	50.8455	33.1263	19.4257	27.7868
292	ENSG00000078401	130.783	-1.4735	0.599068	-2.45965	0.0139073	0.269034	251.162	219.334	57.464	49.1357	76.8223
293	ENSG00000105576	1072.63	-0.825179	0.335803	-2.45733	0.0139974	0.269034	1607.16	1438.63	851.819	749.605	715.918
294	ENSG00000135940	759.769	-0.885816	0.36047	-2.45739	0.0139949	0.269034	1199.54	1022.89	569.908	526.78	479.731
295	ENSG00000267100	57.0326	1.98738	0.807919	2.45988	0.0138983	0.269034	2.74494	40.8758	33.8023	132.552	75.1878
296	ENSG00000213448	1855.87	-1.03266	0.42123	-2.45153	0.0142252	0.271572	3440.78	2580.16	978.916	1002.14	1277.37
297	ENSG00000266289	50.3926	-1.72661	0.704244	-2.45172	0.0142174	0.271572	89.2104	83.7455	37.1826	14.855	26.9695
298	ENSG00000068489	490.507	0.954829	0.390169	2.44722	0.0143964	0.272092	255.279	272.173	540.838	653.619	730.629
299	ENSG00000125398	32.128	-2.17259	0.887264	-2.44864	0.0143398	0.272092	63.1335	18.9424	58.14	5.71345	14.7107
300	ENSG00000244405	97.1367	-1.32378	0.540782	-2.44791	0.0143688	0.272092	159.206	151.54	73.0131	53.7065	48.2182
301	ENSG00000240463	3435.36	-0.995796	0.407286	-2.44495	0.014487	0.272896	6025.13	5015.76	1833.44	1952.86	2349.62
302	ENSG00000089685	72.8361	1.35011	0.552888	2.44192	0.0146093	0.2737	52.1538	39.8788	43.267	89.1299	139.751
303	ENSG00000118971	234.149	-1.21303	0.496836	-2.4415	0.0146263	0.2737	367.821	413.743	128.449	106.27	154.462
304	ENSG00000154146	82.6477	-1.39321	0.571325	-2.43857	0.0147457	0.274745	144.109	123.624	62.1963	39.9942	43.3147
305	ENSG00000159479	87.4504	-1.26397	0.518499	-2.43775	0.0147791	0.274745	144.109	99.6971	98.7028	45.7076	49.0355
306	ENSG00000235761	101.224	-1.30553	0.536047	-2.43548	0.0148721	0.275571	200.38	108.67	89.9142	54.8491	52.3045
307	ENSG00000089693	402.755	-0.960721	0.394963	-2.43243	0.0149979	0.276997	726.035	412.746	362.361	215.968	296.665
308	ENSG00000173546	153.484	1.00195	0.412493	2.42902	0.0151397	0.278709	118.032	115.649	95.3226	225.11	213.304
309	ENSG00000162441	78.6845	1.422	0.586065	2.42636	0.0152511	0.279851	49.4088	30.9061	60.8442	82.2737	169.99
310	ENSG00000074590	409.918	-1.03434	0.428923	-2.41149	0.0158876	0.284401	734.27	554.316	258.25	273.103	229.65
311	ENSG00000088298	70.7217	-1.57802	0.652722	-2.4176	0.0156234	0.284401	129.012	118.64	41.9149	23.9965	40.0457
312	ENSG00000104884	140.707	-1.30676	0.541913	-2.41138	0.0158924	0.284401	181.166	269.182	103.435	103.985	45.7665
313	ENSG00000116830	71.6781	1.3061	0.541537	2.41185	0.0158719	0.284401	46.6639	37.8849	50.7035	106.27	116.868
314	ENSG00000127483	224.445	0.981082	0.405934	2.41685	0.0156554	0.284401	201.753	111.661	171.716	285.673	351.421
315	ENSG00000151366	163.744	-1.05615	0.437586	-2.41359	0.0157962	0.284401	259.396	198.397	162.927	81.131	116.868
316	ENSG00000157259	231.581	1.07264	0.444867	2.41114	0.0159027	0.284401	94.7003	155.527	230.532	279.959	397.188
317	ENSG00000164105	220.473	-1.16504	0.48281	-2.41304	0.0158202	0.284401	418.603	294.106	137.914	106.27	145.472
318	ENSG00000196498	901.688	-0.974885	0.404509	-2.41005	0.0159505	0.284401	1502.85	1329.96	534.753	522.21	618.665
319	ENSG00000070814	100.447	1.25633	0.52284	2.4029	0.0162657	0.286612	37.0566	69.7879	85.858	159.977	149.558
320	ENSG00000100234	650.762	-0.7475	0.310751	-2.40546	0.0161521	0.286612	872.889	804.555	651.709	500.498	424.157
321	ENSG00000171206	173.827	-1.00447	0.418066	-2.40265	0.0162767	0.286612	248.417	234.288	169.688	121.125	95.6192
322	ENSG00000213465	82.1465	1.46085	0.607668	2.40402	0.0162159	0.286612	45.2914	21.9334	77.0693	117.697	148.741
323	ENSG00000112079	391.377	-0.924046	0.38543	-2.39744	0.01651	0.28982	609.376	541.355	298.137	245.678	262.34
324	ENSG00000168899	335.127	-1.18722	0.496035	-2.39342	0.0166919	0.292109	683.489	451.628	161.575	205.684	173.259
325	ENSG00000163320	105.508	-1.27368	0.533168	-2.38889	0.0168995	0.294831	178.421	158.518	77.0693	51.4211	62.1116
326	ENSG00000005249	126.265	1.21261	0.5082	2.38609	0.0170284	0.296169	54.8987	67.794	124.393	155.406	228.832
327	ENSG00000090238	144.291	-1.24346	0.521639	-2.38375	0.0171374	0.297153	245.672	230.3	87.21	87.9872	70.2842
328	ENSG00000147324	277.786	0.928799	0.390444	2.37882	0.0173679	0.29881	167.441	165.497	277.855	425.081	353.056
329	ENSG00000166441	6234.62	-0.667444	0.280504	-2.37945	0.0173385	0.29881	8669.88	7496.22	5791.69	4513.63	4701.69
330	ENSG00000187109	1141.28	0.746282	0.313783	2.37833	0.017391	0.29881	661.529	917.213	1113.45	1524.35	1489.86
331	ENSG00000116117	155.234	0.971174	0.408842	2.37543	0.0175287	0.299361	105.68	124.621	106.139	218.254	221.477
332	ENSG00000176788	2387.17	0.658869	0.277311	2.37592	0.0175052	0.299361	1921.45	1728.75	2164.03	3401.79	2719.84
333	ENSG00000099956	206.619	-1.1677	0.492304	-2.37191	0.0176966	0.300828	430.955	227.309	139.266	103.985	131.579
334	ENSG00000168061	45.3016	1.78301	0.751965	2.37113	0.0177336	0.300828	34.3117	18.9424	16.2251	37.7088	119.32
335	ENSG00000272333	82.4184	1.31816	0.556115	2.3703	0.0177738	0.300828	32.9392	45.8606	75.0412	129.124	129.127
336	ENSG00000105221	238.44	-0.90581	0.38332	-2.36307	0.0181244	0.302251	349.979	294.106	235.94	140.551	171.624
337	ENSG00000133026	207.392	0.949092	0.400899	2.36741	0.017913	0.302251	188.028	111.661	154.139	302.813	280.32
338	ENSG00000139278	46.8156	-1.76695	0.747063	-2.3652	0.0180203	0.302251	35.6842	92.7183	67.6047	10.2842	27.7868
339	ENSG00000165633	34.2734	1.76615	0.747208	2.36367	0.018095	0.302251	13.7247	18.9424	19.6054	47.993	71.1015
340	ENSG00000249448	44.631	-1.70815	0.722753	-2.3634	0.0181084	0.302251	82.3481	70.7849	32.4503	17.1404	20.4315
341	ENSG00000113657	1035.45	-0.962354	0.407504	-2.36158	0.0181971	0.302574	1917.34	1284.1	656.442	781.6	537.756
342	ENSG00000148153	113.726	1.17688	0.498975	2.35859	0.0183443	0.30413	50.7813	92.7183	82.4777	210.255	132.396
343	ENSG00000089220	410.764	0.862952	0.366416	2.35512	0.0185168	0.306094	207.243	324.015	395.487	577.059	550.015
344	ENSG00000022277	232.868	1.34882	0.575994	2.34172	0.0191952	0.30765	38.4291	123.624	267.715	366.804	367.766
345	ENSG00000072062	192.235	-1.17729	0.504132	-2.33528	0.0195285	0.30765	349.979	283.14	109.52	124.553	93.9847
346	ENSG00000079819	192.486	0.965471	0.411012	2.34901	0.0188236	0.30765	98.8177	170.482	148.054	281.102	263.974
347	ENSG00000087245	895.399	-0.758248	0.322839	-2.34869	0.0188397	0.30765	1394.43	969.055	848.439	668.474	596.599
348	ENSG00000104805	234.436	0.986852	0.422083	2.33805	0.0193846	0.30765	146.854	117.643	239.321	372.517	295.848
349	ENSG00000112297	65.944	1.55017	0.660447	2.34715	0.0189177	0.30765	12.3522	51.8425	46.6472	114.269	104.609
350	ENSG00000113732	273.84	0.82305	0.352318	2.3361	0.019486	0.30765	183.911	226.312	217.687	353.091	388.198
351	ENSG00000131051	2481.94	-0.788506	0.337652	-2.33526	0.0195298	0.30765	3829.18	3302.96	1822.62	1751.74	1703.17
352	ENSG00000131966	83.1926	-1.31179	0.561641	-2.33563	0.0195106	0.30765	108.425	150.543	68.9568	47.993	40.0457
353	ENSG00000153815	179.538	-0.949299	0.406009	-2.33812	0.0193808	0.30765	263.514	222.324	181.857	113.126	116.868
354	ENSG00000171490	229.674	0.856271	0.365307	2.34398	0.0190793	0.30765	166.069	189.424	164.955	299.385	328.538
355	ENSG00000173821	178.798	1.20982	0.515284	2.34787	0.0188813	0.30765	78.2306	71.7819	200.11	331.38	212.487
356	ENSG00000175352	100.058	-1.19778	0.511388	-2.34221	0.0191698	0.30765	170.186	126.615	91.2663	52.5638	59.6599
357	ENSG00000177830	388.525	-0.819547	0.350955	-2.33519	0.0195333	0.30765	503.696	553.319	353.573	252.535	279.502
358	ENSG00000226242	761.3	-1.07708	0.460206	-2.34043	0.0192614	0.30765	1195.42	1324.97	373.178	341.664	571.264
359	ENSG00000233839	584.978	-1.07922	0.459939	-2.34645	0.0189532	0.30765	1251.69	652.019	320.446	365.661	335.076
360	ENSG00000256235	162.499	-1.09029	0.465666	-2.34136	0.0192135	0.30765	168.814	156.524	293.404	77.7029	116.051
361	ENSG00000185361	37.2602	2.05177	0.879826	2.33202	0.0196996	0.309409	17.8421	2.99091	28.394	47.993	89.0812
362	ENSG00000198910	60.3556	1.4471	0.622022	2.32645	0.0199947	0.313177	38.4291	48.8516	20.2814	99.4141	94.802
363	ENSG00000115415	254.258	0.85182	0.366393	2.32488	0.0200784	0.313621	156.461	199.394	220.391	342.807	352.238
364	ENSG00000102144	212.031	-0.910302	0.392264	-2.32063	0.0203067	0.314587	322.53	225.315	235.264	129.124	147.924
365	ENSG00000136158	56.0415	-1.41791	0.610754	-2.32157	0.0202561	0.314587	63.1335	80.7546	80.4496	23.9965	31.8731
366	ENSG00000226532	1609.81	-0.953652	0.410937	-2.32068	0.0203043	0.314587	2628.28	2505.39	855.199	972.43	1087.77
367	ENSG00000071127	739.346	-0.954896	0.411905	-2.31824	0.0204361	0.315212	1258.55	1049.81	443.487	407.94	536.939
368	ENSG00000132475	1494.46	-0.74617	0.321925	-2.31784	0.0204582	0.315212	2200.07	1931.13	1216.88	1030.71	1093.49
369	ENSG00000104643	99.9324	-1.21263	0.524005	-2.31416	0.020659	0.315479	188.028	101.691	98.7028	54.8491	56.3908
370	ENSG00000109680	44.4495	-1.57811	0.681913	-2.31424	0.0206546	0.315479	78.2306	54.8334	48.6754	21.7111	18.7969
371	ENSG00000136026	2136.24	0.647659	0.280137	2.31194	0.0207811	0.315479	1581.08	1603.13	2039.63	2512.78	2944.58
372	ENSG00000136240	270.62	-1.00629	0.435355	-2.31142	0.0208094	0.315479	435.072	397.791	183.885	150.835	185.518
373	ENSG00000149090	97.3609	-1.21934	0.526444	-2.31619	0.020548	0.315479	153.716	120.633	104.787	36.5661	71.1015
374	ENSG00000244753	189.914	-1.22003	0.527718	-2.3119	0.0207829	0.315479	349.979	296.1	92.6184	111.984	98.8883
375	ENSG00000005100	56.5909	1.74926	0.75884	2.30517	0.0211568	0.315693	6.86234	27.9152	51.3796	125.696	71.1015
376	ENSG00000010244	299.22	-0.88515	0.38595	-2.29343	0.0218234	0.315693	440.562	404.77	254.194	221.682	174.893
377	ENSG00000017797	185.937	0.895761	0.390816	2.29203	0.0219041	0.315693	153.716	121.63	139.942	242.25	272.147
378	ENSG00000073711	70.913	-1.37381	0.595959	-2.3052	0.0211553	0.315693	120.777	75.7698	85.1819	49.1357	23.7005
379	ENSG00000089009	328.648	0.992576	0.434168	2.28616	0.0222451	0.315693	166.069	168.488	370.474	381.659	556.553
380	ENSG00000107581	2316.38	0.67021	0.292909	2.28812	0.0221306	0.315693	1541.28	1721.77	2355.35	2947	3016.5
381	ENSG00000112769	212.275	0.970301	0.422598	2.29604	0.0216737	0.315693	101.563	205.376	152.787	267.39	334.259
382	ENSG00000115935	364.312	-1.00405	0.435138	-2.30743	0.0210311	0.315693	687.606	436.673	243.377	253.677	200.228
383	ENSG00000118217	120.648	1.23722	0.540484	2.2891	0.0220738	0.315693	35.6842	80.7546	116.956	162.262	207.584
384	ENSG00000121579	219.098	-1.02585	0.448302	-2.28829	0.0221207	0.315693	369.194	292.112	164.955	107.413	161.817
385	ENSG00000124766	445.326	-0.774031	0.338415	-2.28722	0.0221828	0.315693	435.072	509.452	657.118	294.814	330.172
386	ENSG00000126457	1032.07	-0.888504	0.387366	-2.29371	0.0218073	0.315693	1799.3	1328.96	666.582	725.608	639.913
387	ENSG00000128524	203.152	-0.970131	0.421643	-2.30084	0.0214009	0.315693	315.668	219.334	223.772	95.986	161
388	ENSG00000134871	148.275	1.07636	0.469079	2.29463	0.0217542	0.315693	74.1132	84.7425	148.054	245.678	188.787
389	ENSG00000136830	290.558	-0.973623	0.425256	-2.2895	0.0220503	0.315693	463.894	420.722	200.786	167.975	199.411
390	ENSG00000154096	164.677	0.976323	0.424059	2.30233	0.0213167	0.315693	107.052	95.7092	152.787	225.11	242.726
391	ENSG00000155827	99.3599	1.17106	0.512338	2.28571	0.0222711	0.315693	50.7813	69.7879	77.7454	109.698	188.787
392	ENSG00000156802	221.911	0.908688	0.396202	2.29349	0.0218195	0.315693	182.538	193.412	117.632	311.954	304.02
393	ENSG00000163808	50.3639	1.45422	0.631155	2.30406	0.0212194	0.315693	30.1943	22.9303	35.8305	75.4176	87.4466
394	ENSG00000164733	3157.25	0.72184	0.315533	2.28769	0.0221558	0.315693	1722.45	2548.26	3246.38	4072.55	4196.62
395	ENSG00000169136	39.4773	1.7063	0.745646	2.28835	0.0221171	0.315693	13.7247	13.9576	33.8023	69.7041	66.1979
396	ENSG00000178741	220.464	-0.846463	0.369255	-2.29235	0.0218853	0.315693	253.906	285.134	265.01	151.978	146.289
397	ENSG00000185813	71.5282	1.55121	0.674196	2.30083	0.0214015	0.315693	17.8421	29.9091	72.337	82.2737	155.279
398	ENSG00000204381	113.35	1.14945	0.498229	2.30708	0.0210504	0.315693	97.4452	46.8576	84.5059	185.116	152.827
399	ENSG00000240652	173.402	-1.01968	0.442818	-2.3027	0.0212955	0.315693	241.554	262.203	149.406	87.9872	125.858
400	ENSG00000244398	596.307	-0.728572	0.316605	-2.3012	0.0213803	0.315693	760.347	777.637	588.161	469.646	385.746
401	ENSG00000179031	221.376	-1.22827	0.537606	-2.28471	0.0223297	0.315735	500.951	253.231	108.168	121.125	123.406
402	ENSG00000170801	100.598	-1.11848	0.490665	-2.27951	0.0226367	0.318486	120.777	149.546	114.252	68.5614	49.8528
403	ENSG00000213463	41.7061	1.61877	0.710121	2.27957	0.0226329	0.318486	23.3319	15.9515	29.07	50.2784	89.8984
404	ENSG00000136044	55.8529	1.39905	0.615908	2.27153	0.0231151	0.324412	21.9595	38.8819	39.8868	90.2725	88.2639
405	ENSG00000177469	10844.4	0.688138	0.303259	2.26914	0.0232597	0.324834	6391.58	8328.69	11419.8	13593.4	14488.4
406	ENSG00000197930	67.9596	-1.28266	0.565194	-2.26942	0.0232426	0.324834	89.2104	102.688	75.0412	31.9953	40.8629
407	ENSG00000054116	201.102	-1.04566	0.461996	-2.26336	0.0236137	0.324937	321.157	303.079	136.561	107.413	137.299
408	ENSG00000102054	110.97	1.14835	0.509299	2.25476	0.0241487	0.324937	76.8582	62.8091	83.8298	225.11	106.244
409	ENSG00000102898	325.154	-0.948008	0.420246	-2.25584	0.0240805	0.324937	597.023	369.876	242.025	218.254	198.594
410	ENSG00000126814	439.182	-0.956622	0.424072	-2.2558	0.0240832	0.324937	712.311	657.004	265.686	299.385	261.523
411	ENSG00000128595	3183.1	0.806256	0.355821	2.2659	0.0234575	0.324937	1660.69	1965.03	3720.96	3925.14	4643.66
412	ENSG00000131149	37.7877	2.09376	0.929149	2.25342	0.0242326	0.324937	9.60727	2.99091	35.8305	45.7076	94.802
413	ENSG00000137154	2091.31	0.762884	0.338275	2.25522	0.0241196	0.324937	1078.76	1545.3	2280.31	2630.47	2921.7
414	ENSG00000143319	116.32	1.56886	0.69545	2.25589	0.0240777	0.324937	35.6842	19.9394	138.59	123.411	263.974
415	ENSG00000161013	197.692	-0.902605	0.39963	-2.2586	0.0239082	0.324937	295.081	210.361	223.772	115.412	143.837
416	ENSG00000162909	542.382	-0.805902	0.357657	-2.25328	0.0242413	0.324937	776.817	752.713	434.698	338.236	409.446
417	ENSG00000183978	256.802	-1.06853	0.471851	-2.26455	0.0235406	0.324937	360.959	449.634	163.603	195.4	114.416
418	ENSG00000186575	110.306	1.09134	0.483757	2.25596	0.0240731	0.324937	57.6436	101.691	68.2807	164.547	159.365
419	ENSG00000210144	163.87	0.969505	0.429367	2.25799	0.0239465	0.324937	118.032	136.585	100.731	283.387	180.614
420	ENSG00000216676	104.813	-1.25605	0.554603	-2.26478	0.0235265	0.324937	189.401	151.54	68.9568	65.1334	49.0355
421	ENSG00000224627	38.4369	-1.84294	0.81439	-2.26297	0.0236375	0.324937	32.9392	93.7152	35.1544	20.5684	9.8071
422	ENSG00000231434	874.055	-0.999198	0.442593	-2.2576	0.0239708	0.324937	1542.65	1275.13	459.712	677.615	415.167
423	ENSG00000243667	66.8574	1.28922	0.571546	2.25568	0.0240909	0.324937	53.5262	34.894	39.2107	85.7018	120.954
424	ENSG00000187514	4486.72	0.734445	0.326096	2.25223	0.0243074	0.325055	2725.72	2854.33	5054.13	6203.67	5595.77
425	ENSG00000114993	32.5059	-1.92032	0.853245	-2.25061	0.0244102	0.32566	45.2914	72.7789	20.2814	10.2842	13.8934
426	ENSG00000228453	222.807	-1.14302	0.508173	-2.24928	0.024495	0.326024	380.174	362.897	112.9	148.55	109.513
427	ENSG00000117906	73.747	1.28806	0.573467	2.24609	0.0246985	0.327197	35.6842	46.8576	57.464	79.9883	148.741
428	ENSG00000123240	513.188	0.749444	0.333593	2.24658	0.0246666	0.327197	312.923	429.694	466.472	603.341	753.512
429	ENSG00000164587	4470.07	-0.778788	0.346916	-2.24489	0.0247751	0.327271	6786.85	6273.94	3036.13	3106.98	3146.44
430	ENSG00000167193	175.731	0.91537	0.408039	2.24334	0.0248749	0.327271	100.19	141.57	146.702	254.82	235.37
431	ENSG00000181072	41.0048	1.54619	0.689245	2.2433	0.0248772	0.327271	21.9595	18.9424	28.394	77.7029	58.0253
432	ENSG00000088986	232.261	0.870532	0.389478	2.23513	0.0254091	0.331595	156.461	141.57	224.448	334.808	304.02
433	ENSG00000127314	291.537	-0.938267	0.419766	-2.23522	0.0254031	0.331595	496.833	373.864	211.603	175.974	199.411
434	ENSG00000138663	253.413	-0.985398	0.44076	-2.23568	0.0253728	0.331595	451.542	320.028	177.124	150.835	167.538
435	ENSG00000279483	380.838	0.784593	0.351102	2.23466	0.0254398	0.331595	352.724	260.209	274.475	419.367	597.416
436	ENSG00000070614	403.937	-0.948849	0.426155	-2.22653	0.0259786	0.337841	710.938	536.37	254.87	238.822	278.685
437	ENSG00000113658	194.163	0.884991	0.397885	2.22424	0.0261323	0.338181	131.757	123.624	179.152	255.963	280.32
438	ENSG00000146223	522.802	0.791016	0.355699	2.22384	0.0261594	0.338181	286.846	389.816	535.429	764.46	637.462
439	ENSG00000197756	1440.15	-0.733411	0.329849	-2.22348	0.0261837	0.338181	1859.69	2061.74	1219.59	838.735	1220.98
440	ENSG00000155034	52.1414	1.44168	0.648855	2.22188	0.0262911	0.338797	35.6842	33.897	23.6616	57.1345	110.33
441	ENSG00000171552	289.918	-0.927427	0.41761	-2.2208	0.0263647	0.338975	419.975	396.794	256.222	249.107	127.492
442	ENSG00000143799	230.751	1.09454	0.493073	2.21984	0.0264295	0.339038	86.4655	112.658	275.151	371.374	308.106
443	ENSG00000108344	212.967	-0.927759	0.419804	-2.20998	0.0271066	0.339142	282.728	332.988	173.068	142.836	133.213
444	ENSG00000115641	174.135	-0.885344	0.400625	-2.20991	0.0271115	0.339142	200.38	221.327	217.687	129.124	102.157
445	ENSG00000116251	49.7414	1.40601	0.636233	2.2099	0.0271124	0.339142	28.8218	22.9303	37.8586	82.2737	76.8223
446	ENSG00000122008	49.8664	-1.44721	0.655052	-2.20931	0.027153	0.339142	86.4655	61.8122	52.0556	28.5673	20.4315
447	ENSG00000140416	2104.71	0.616813	0.278485	2.21488	0.0267681	0.339142	1487.75	1687.87	2026.79	2705.89	2615.23
448	ENSG00000143847	68.4152	-1.45765	0.658721	-2.21285	0.0269079	0.339142	109.797	128.609	37.1826	29.71	36.7766
449	ENSG00000151413	49.8847	1.39811	0.631939	2.21242	0.0269379	0.339142	31.5668	22.9303	35.8305	82.2737	76.8223
450	ENSG00000155957	49.4351	1.50107	0.679701	2.20842	0.0272151	0.339142	19.2145	36.8879	29.07	109.698	52.3045
451	ENSG00000163359	3831.18	0.827348	0.373995	2.21219	0.0269534	0.339142	1822.64	2297.02	4653.23	5548.9	4834.08
452	ENSG00000167693	243.834	0.802647	0.363435	2.2085	0.0272095	0.339142	215.477	167.491	181.181	325.667	329.355
453	ENSG00000170340	143.82	-1.06307	0.480651	-2.21172	0.0269858	0.339142	208.615	224.318	112.224	102.842	71.1015
454	ENSG00000198959	131.804	-1.02932	0.465237	-2.21245	0.0269353	0.339142	205.87	174.47	116.956	74.2749	87.4466
455	ENSG00000243759	185.61	-1.06749	0.481929	-2.21503	0.0267581	0.339142	360.959	215.346	128.449	109.698	113.599
456	ENSG00000104853	255.012	-0.990615	0.448987	-2.20633	0.0273608	0.339743	463.894	312.052	179.152	185.116	134.848
457	ENSG00000112514	287.074	0.86564	0.392487	2.20553	0.0274172	0.339743	194.89	155.527	296.785	377.088	411.081
458	ENSG00000143761	391.907	-0.847986	0.384712	-2.20421	0.0275095	0.339743	562.712	502.473	364.389	342.807	187.152
459	ENSG00000163754	264.02	-1.00573	0.456433	-2.20345	0.0275629	0.339743	441.935	390.812	158.871	169.118	159.365
460	ENSG00000228887	106.554	-1.20381	0.546169	-2.2041	0.0275172	0.339743	204.498	131.6	77.7454	50.2784	68.6497
461	ENSG00000005075	83.2837	-1.15107	0.523284	-2.1997	0.027828	0.342267	115.287	84.7425	120.336	44.5649	51.4873
462	ENSG00000006015	121.975	-1.01954	0.464046	-2.19708	0.0280149	0.343077	193.518	123.624	141.97	78.8456	71.9187
463	ENSG00000065427	173.445	1.00847	0.458911	2.19752	0.0279832	0.343077	71.3683	140.573	157.519	212.54	285.223
464	ENSG00000160087	55.4382	-1.33372	0.608139	-2.19312	0.0282989	0.345276	64.506	85.7395	68.9568	28.5673	29.4213
465	ENSG00000198793	75.4151	1.24009	0.565507	2.19288	0.0283163	0.345276	68.6234	46.8576	31.7742	121.125	108.695
466	ENSG00000177954	1248.76	-0.90492	0.413092	-2.1906	0.0284805	0.346533	1962.63	1954.06	688.892	684.472	953.74
467	ENSG00000092847	66.2555	1.28917	0.589364	2.18739	0.0287141	0.3468	37.0566	28.9121	59.4921	102.842	102.975
468	ENSG00000112902	254.056	0.864414	0.395565	2.18526	0.0288694	0.3468	150.971	161.509	260.278	325.667	371.853
469	ENSG00000130312	238.004	-1.0163	0.465052	-2.18536	0.0288627	0.3468	468.011	250.24	177.124	173.689	120.954
470	ENSG00000132005	332.671	-1.04445	0.477162	-2.18888	0.0286057	0.3468	564.084	529.391	164.279	193.115	212.487
471	ENSG00000132694	68.0116	1.54103	0.704439	2.1876	0.0286986	0.3468	16.4696	20.9364	77.0693	111.984	113.599
472	ENSG00000242411	33.0703	-1.7957	0.821693	-2.18536	0.0288623	0.3468	64.506	48.8516	25.6898	9.14152	17.1624
473	ENSG00000137171	42.1551	-1.76069	0.806116	-2.18417	0.0289497	0.347029	75.4857	74.7728	26.3658	7.99883	26.1523
474	ENSG00000204228	102.488	-1.22436	0.561075	-2.18217	0.029097	0.347503	181.166	153.533	64.2245	62.848	50.67
475	ENSG00000264364	1641.28	-0.775034	0.355199	-2.18197	0.0291118	0.347503	2589.85	2173.4	1143.2	1226.11	1073.88
476	ENSG00000007168	437.433	-0.906763	0.416184	-2.17875	0.02935	0.347913	754.857	580.237	279.207	281.102	291.761
477	ENSG00000052802	300.517	-0.835363	0.383623	-2.17756	0.0294388	0.347913	459.777	352.928	281.236	241.108	167.538
478	ENSG00000111145	650.773	-0.865441	0.397435	-2.17757	0.0294383	0.347913	1140.52	805.552	436.726	484.501	386.563
479	ENSG00000135617	39.5626	-1.64514	0.755563	-2.17737	0.029453	0.347913	28.8218	78.7607	55.4358	15.9977	18.7969
480	ENSG00000196611	115.321	-1.54639	0.709458	-2.17968	0.0292812	0.347913	68.6234	53.8364	346.812	41.1369	66.1979
481	ENSG00000149269	568.232	-1.00428	0.461517	-2.17603	0.0295531	0.34837	1060.92	802.561	269.743	356.519	351.421
482	ENSG00000142949	43.7332	1.79385	0.824793	2.17491	0.029637	0.348634	30.1943	3.98788	31.7742	91.4152	61.2944
483	ENSG00000011105	157.754	-1.20395	0.555215	-2.16844	0.0301254	0.352187	297.825	238.276	76.3933	70.8468	105.426
484	ENSG00000033867	524.606	-0.676495	0.311944	-2.16864	0.0301101	0.352187	675.254	642.049	534.077	385.087	386.563
485	ENSG00000131462	144.573	-1.15632	0.532907	-2.16983	0.0300201	0.352187	255.279	221.327	80.4496	74.2749	91.5329
486	ENSG00000184164	84.8142	-1.10975	0.512425	-2.16569	0.0303351	0.35391	112.542	111.661	100.055	43.4222	56.3908
487	ENSG00000100028	54.3588	1.31713	0.610292	2.1582	0.0309124	0.354394	32.9392	29.9091	39.2107	70.8468	98.8883
488	ENSG00000120254	52.5744	1.52248	0.705823	2.15703	0.0310031	0.354394	34.3117	10.9667	44.6191	93.7006	79.2741
489	ENSG00000130703	47.0358	-1.43834	0.666191	-2.15905	0.0308466	0.354394	76.8582	66.797	45.2951	21.7111	24.5178
490	ENSG00000134369	809.258	-0.659626	0.305022	-2.16256	0.0305754	0.354394	1126.8	900.264	818.693	645.62	554.918
491	ENSG00000140367	103.865	1.17027	0.542732	2.15625	0.0310642	0.354394	63.1335	51.8425	91.9424	215.968	96.4365
492	ENSG00000146122	31.5277	1.67275	0.774096	2.16091	0.0307026	0.354394	23.3319	13.9576	13.5209	53.7065	53.1218
493	ENSG00000171992	1149.22	-0.885775	0.410575	-2.1574	0.0309744	0.354394	1966.75	1597.15	659.146	891.299	631.741
494	ENSG00000196642	232.661	0.835667	0.387222	2.15811	0.0309195	0.354394	141.364	220.331	169.012	347.378	285.223
495	ENSG00000223803	39.5297	-1.68885	0.780801	-2.16297	0.0305436	0.354394	69.9958	67.794	26.3658	11.4269	22.066
496	ENSG00000233762	2319.02	-0.75351	0.349402	-2.15657	0.0310393	0.354394	3691.94	2959.01	1659.02	1821.45	1463.71
497	ENSG00000257074	65.3494	-1.60165	0.74188	-2.1589	0.0308579	0.354394	120.777	122.627	25.0137	18.283	40.0457
498	ENSG00000112576	301.224	-0.998981	0.463723	-2.15426	0.0312196	0.354797	606.631	317.037	206.87	150.835	224.746
499	ENSG00000144043	161.57	-1.11434	0.517288	-2.1542	0.0312247	0.354797	301.943	224.318	91.9424	94.8433	94.802
500	ENSG00000287932	89.4656	-1.33432	0.621044	-2.14851	0.031673	0.359172	115.287	188.427	50.0275	55.9918	37.5939
501	ENSG00000106400	97.4481	1.16858	0.544427	2.14645	0.0318373	0.359597	39.8016	54.8334	99.3789	131.409	161.817
502	ENSG00000163605	206.213	0.815795	0.379943	2.14715	0.031781	0.359597	150.971	142.567	180.505	268.532	288.492
503	ENSG00000133884	74.2182	-1.18044	0.550685	-2.14359	0.0320657	0.360739	90.5829	117.643	78.4214	46.8503	37.5939
504	ENSG00000168140	200.664	1.21119	0.564891	2.14412	0.0320235	0.360739	50.7813	91.7213	250.137	362.233	248.447
505	ENSG00000103145	69.8563	1.25579	0.586622	2.14072	0.0322968	0.36236	35.6842	46.8576	52.0556	70.8468	143.837
506	ENSG00000230611	163.112	-1.09303	0.510711	-2.14021	0.0323376	0.36236	289.591	238.276	93.9705	100.557	93.1675
507	ENSG00000238227	49.7942	-1.42763	0.667773	-2.13789	0.0325255	0.363747	85.093	62.8091	52.0556	17.1404	31.8731
508	ENSG00000198408	229.832	1.16185	0.544657	2.13317	0.0329109	0.367333	67.2509	96.7062	295.432	375.945	313.827
509	ENSG00000083099	290.588	0.995988	0.467289	2.13142	0.0330548	0.368213	108.425	189.424	324.503	310.812	519.776
510	ENSG00000075785	585.418	-0.652271	0.306922	-2.1252	0.0335698	0.369086	771.327	679.934	604.386	445.649	425.792
511	ENSG00000122741	148.026	1.03231	0.485836	2.1248	0.0336029	0.369086	65.8784	85.7395	160.223	218.254	210.035
512	ENSG00000143870	461.077	0.733045	0.345048	2.12447	0.0336308	0.369086	415.858	264.197	413.741	566.774	644.817
513	ENSG00000162063	274.667	-1.03008	0.483705	-2.12957	0.0332071	0.369086	451.542	434.679	150.082	130.267	206.766
514	ENSG00000166401	68.7316	-1.21339	0.571221	-2.12419	0.0336539	0.369086	76.8582	75.7698	114.252	34.2807	42.4974
515	ENSG00000188375	205.07	-1.03767	0.487978	-2.12646	0.0334648	0.369086	382.918	254.228	137.914	92.5579	157.731
516	ENSG00000196428	272.246	-0.981825	0.4614	-2.12793	0.0333431	0.369086	400.761	460.6	156.843	171.404	171.624
517	ENSG00000248905	77.2435	-1.17366	0.55198	-2.12628	0.03348	0.369086	69.9958	107.673	120.336	39.9942	48.2182
518	ENSG00000086015	255.111	-1.09935	0.517988	-2.12234	0.0338089	0.370071	437.817	412.746	122.364	193.115	109.513
519	ENSG00000092853	176.291	0.86345	0.407388	2.11948	0.0340498	0.37118	160.579	105.679	132.505	239.965	242.726
520	ENSG00000137501	35.8999	1.63563	0.771959	2.11881	0.0341066	0.37118	23.3319	9.96971	25.0137	75.4176	45.7665
521	ENSG00000166147	2925.32	-0.77102	0.363838	-2.11913	0.0340794	0.37118	4562.08	4101.54	1855.07	2015.71	2092.18
522	ENSG00000053254	206.697	-1.01843	0.482127	-2.11237	0.0346547	0.372582	387.036	264.197	127.097	121.125	134.03
523	ENSG00000164741	183.311	-0.860418	0.406927	-2.11443	0.0344789	0.372582	174.303	252.234	243.377	131.409	115.233
524	ENSG00000167645	30.1707	-1.70355	0.806618	-2.11197	0.0346889	0.372582	43.919	29.9091	51.3796	12.5696	13.0761
525	ENSG00000176896	30.5181	-2.01791	0.954594	-2.11389	0.0345244	0.372582	50.7813	70.7849	9.46466	12.5696	8.98984
526	ENSG00000178982	1261.89	-0.791949	0.374381	-2.11535	0.0343999	0.372582	2040.86	1649.99	866.016	718.752	1033.83
527	ENSG00000204351	52.6496	-1.53091	0.724897	-2.11189	0.0346955	0.372582	80.9756	101.691	31.0982	33.138	16.3452
528	ENSG00000215301	465.631	-0.724722	0.343134	-2.11207	0.0346806	0.372582	498.206	711.837	448.895	343.95	325.269
529	ENSG00000008405	35.8891	-1.76805	0.837499	-2.11111	0.0347632	0.372604	52.1538	65.8001	31.7742	23.9965	5.72081
530	ENSG00000260257	88.2414	-1.22375	0.579915	-2.11022	0.0348392	0.372714	175.676	85.7395	81.8017	62.848	35.1421
531	ENSG00000227747	160.553	-1.29231	0.612836	-2.10874	0.0349669	0.373375	336.255	243.261	52.0556	78.8456	92.3502
532	ENSG00000197081	260.087	1.04036	0.493616	2.10764	0.0350625	0.373692	208.615	98.7001	241.349	209.112	542.66
533	ENSG00000095787	504.148	-0.713439	0.339166	-2.10351	0.0354215	0.375774	764.464	552.322	475.937	378.231	349.787
534	ENSG00000115875	93.1057	-1.1492	0.546091	-2.10442	0.0353419	0.375774	175.676	99.6971	83.1538	45.7076	61.2944
535	ENSG00000135250	205.158	0.838014	0.398465	2.10311	0.0354566	0.375774	159.206	187.43	121.688	307.384	250.081
536	ENSG00000101460	101.828	-1.18876	0.56583	-2.10092	0.0356478	0.376393	108.425	210.361	75.0412	66.276	49.0355
537	ENSG00000138069	231.714	-0.976675	0.464828	-2.10115	0.0356276	0.376393	371.939	352.928	141.294	131.409	161
538	ENSG00000157350	41.266	1.89201	0.901015	2.09986	0.035741	0.376675	1.37247	19.9394	37.1826	68.5614	79.2741
539	ENSG00000010438	62.6443	-1.27559	0.607912	-2.09831	0.0358781	0.37672	87.8379	55.8304	102.083	27.4246	40.0457
540	ENSG00000224685	33.6863	-1.64264	0.782597	-2.09896	0.03582	0.37672	50.7813	56.8273	31.0982	18.283	11.4416
541	ENSG00000108774	774.089	-0.849944	0.405857	-2.0942	0.0362424	0.377054	1334.04	1024.89	467.148	573.631	470.741
542	ENSG00000136942	7612.91	-0.727483	0.347192	-2.09533	0.0361412	0.377054	12055.8	9958.74	5124.44	5448.35	5477.27
543	ENSG00000139921	35.1934	1.56696	0.747834	2.09533	0.0361421	0.377054	19.2145	13.9576	25.6898	69.7041	47.401
544	ENSG00000183963	119.311	-0.969693	0.462967	-2.09452	0.0362138	0.377054	185.283	133.594	126.421	77.7029	73.5533
545	ENSG00000264379	48.4994	-1.58619	0.75717	-2.09489	0.0361805	0.377054	34.3117	40.8758	123.041	20.5684	23.7005
546	ENSG00000113328	237.552	-0.978189	0.467446	-2.09262	0.0363827	0.37713	396.643	349.937	141.294	163.405	136.482
547	ENSG00000198554	45.3163	1.41683	0.676884	2.09317	0.0363342	0.37713	34.3117	16.9485	30.4221	63.9907	80.9086
548	ENSG00000156467	568.853	0.895179	0.428606	2.08858	0.0367453	0.380193	237.437	324.015	706.469	748.462	827.883
549	ENSG00000173457	172.805	-0.906005	0.434475	-2.08529	0.0370431	0.381252	225.085	267.188	145.35	111.984	114.416
550	ENSG00000204941	52.3154	1.35569	0.649887	2.08605	0.0369743	0.381252	38.4291	39.8788	18.9293	71.9895	92.3502
551	ENSG00000241352	519.688	-1.00101	0.480052	-2.08522	0.0370494	0.381252	956.61	767.667	225.8	293.671	354.69
552	ENSG00000177606	591.989	-0.804925	0.386382	-2.08323	0.0372299	0.382416	848.185	896.277	398.868	373.66	442.954
553	ENSG00000286067	63.6764	-1.46623	0.70409	-2.08245	0.0373015	0.382459	48.0364	45.8606	162.251	31.9953	30.2386
554	ENSG00000105373	40.3213	1.67029	0.802552	2.08123	0.0374131	0.38291	12.3522	10.9667	40.5628	50.2784	87.4466
555	ENSG00000109519	214.998	-0.800694	0.385025	-2.07959	0.037563	0.383752	273.121	283.14	221.743	130.267	166.721
556	ENSG00000149968	534.314	-0.906268	0.437229	-2.07275	0.0381953	0.38881	433.7	440.661	1095.87	278.816	422.523
557	ENSG00000278943	101.638	-1.34754	0.650082	-2.07288	0.0381834	0.38881	171.558	194.409	37.1826	44.5649	60.4771
558	ENSG00000147164	281.353	-0.793757	0.383262	-2.07106	0.0383535	0.389721	389.781	390.812	235.94	196.543	193.69
559	ENSG00000117632	1371.36	-0.758894	0.366795	-2.06899	0.0385473	0.39099	2175.36	1835.42	909.283	906.154	1030.56
560	ENSG00000101361	402.856	0.841463	0.407037	2.06729	0.0387069	0.391419	161.951	403.773	350.868	548.491	549.198
561	ENSG00000111716	428.146	-0.807169	0.390489	-2.06707	0.0387277	0.391419	660.157	589.21	301.517	294.814	295.03
562	ENSG00000197061	679.267	-0.648498	0.313842	-2.06632	0.0387986	0.391438	754.857	910.234	717.286	581.629	432.33
563	ENSG00000109445	58.7847	1.33327	0.646328	2.06284	0.0391281	0.39406	53.5262	17.9455	38.5347	100.557	83.3604
564	ENSG00000064225	49.2759	-1.36222	0.661151	-2.06038	0.0393621	0.394317	59.0161	57.8243	78.4214	33.138	17.9797
565	ENSG00000132254	185.468	-0.896715	0.435152	-2.06069	0.0393323	0.394317	308.805	218.337	156.167	127.981	116.051
566	ENSG00000137815	279.447	0.729931	0.35426	2.06044	0.0393567	0.394317	204.498	258.215	200.786	378.231	355.507
567	ENSG00000181649	323.8	-0.805444	0.391304	-2.05836	0.039556	0.39556	355.469	353.925	463.092	153.121	293.396
568	ENSG00000099901	854.515	-0.771433	0.375665	-2.05351	0.0400228	0.395689	1313.45	1195.37	564.499	623.909	575.35
569	ENSG00000100030	210.26	-0.911949	0.443932	-2.05426	0.039951	0.395689	308.805	319.031	148.73	149.692	125.041
570	ENSG00000107438	100.696	-1.07643	0.524842	-2.05096	0.0402707	0.395689	133.129	165.497	83.8298	71.9895	49.0355
571	ENSG00000115993	54.5522	1.36667	0.666307	2.0511	0.0402567	0.395689	15.0971	48.8516	35.8305	87.9872	84.9949
572	ENSG00000116191	57.0518	1.27237	0.61988	2.0526	0.0401113	0.395689	23.3319	40.8758	44.6191	74.2749	102.157
573	ENSG00000131469	150.74	0.866522	0.421852	2.05409	0.0399673	0.395689	116.66	125.618	98.0268	231.966	181.431
574	ENSG00000142784	56.2245	-1.51498	0.737352	-2.05462	0.0399154	0.395689	115.287	88.7304	24.3377	21.7111	31.0558
575	ENSG00000144580	62.8411	-1.25833	0.613358	-2.05154	0.0402143	0.395689	52.1538	91.7213	101.407	41.1369	27.7868
576	ENSG00000145685	101.591	-1.04783	0.509637	-2.05603	0.0397797	0.395689	131.757	164.5	87.8861	67.4187	56.3908
577	ENSG00000160062	31.1954	1.65261	0.804232	2.05489	0.0398899	0.395689	10.9797	13.9576	25.0137	42.2795	63.7462
578	ENSG00000183386	105.106	-0.998651	0.487079	-2.05029	0.0403366	0.395689	159.206	133.594	101.407	70.8468	60.4771
579	ENSG00000006042	255.068	-0.854167	0.416995	-2.04838	0.0405224	0.396141	367.821	372.867	191.321	189.687	153.645
580	ENSG00000136802	85.3172	-1.08747	0.530852	-2.04854	0.0405067	0.396141	76.8582	115.649	131.829	54.8491	47.401
581	ENSG00000147140	581.538	0.64272	0.314083	2.04634	0.040723	0.397417	527.028	434.679	463.092	842.163	640.731
582	ENSG00000124614	209.778	-0.867787	0.424333	-2.04506	0.040849	0.397962	231.947	350.934	185.237	156.549	124.223
583	ENSG00000143545	307.572	0.769586	0.376448	2.04434	0.0409203	0.397972	179.793	286.131	252.842	479.93	339.162
584	ENSG00000115234	329.96	-0.721068	0.352901	-2.04326	0.0410272	0.398329	444.679	417.731	313.01	219.397	254.985
585	ENSG00000182809	91.2642	-1.25204	0.613444	-2.041	0.0412505	0.398463	119.405	48.8516	187.941	55.9918	44.132
586	ENSG00000187688	30.5348	-1.64905	0.807963	-2.04099	0.0412518	0.398463	37.0566	52.8394	35.8305	17.1404	9.8071
587	ENSG00000213885	110.003	-1.22207	0.59845	-2.04206	0.0411452	0.398463	188.028	155.527	83.8298	94.8433	27.7868
588	ENSG00000168724	289.018	0.778962	0.382199	2.0381	0.0415395	0.400023	163.324	213.352	296.109	381.659	390.649
589	ENSG00000182287	470.531	-0.864841	0.424367	-2.03796	0.0415544	0.400023	804.266	637.064	281.912	284.53	344.883
590	ENSG00000183684	650.646	-0.650403	0.319522	-2.03555	0.0417954	0.401661	741.132	907.243	634.808	539.35	430.695
591	ENSG00000129351	478.695	0.782705	0.385511	2.03031	0.0423254	0.405183	222.34	403.773	487.43	554.205	725.725
592	ENSG00000145833	343.524	0.681349	0.335672	2.02981	0.0423763	0.405183	296.453	238.276	295.432	444.507	442.954
593	ENSG00000235698	145.028	-1.13225	0.557715	-2.03017	0.0423397	0.405183	306.06	175.467	75.0412	86.8445	81.7258
594	ENSG00000066322	114.699	-0.983263	0.485601	-2.02484	0.0428841	0.40745	171.558	159.515	98.0268	76.5603	67.8324
595	ENSG00000074695	678.056	0.711183	0.351621	2.02258	0.0431164	0.40745	371.939	528.394	719.314	790.742	979.893
596	ENSG00000104866	97.1541	-1.23161	0.608525	-2.02393	0.0429776	0.40745	207.243	119.636	52.0556	47.993	58.8426
597	ENSG00000163431	146.936	1.07847	0.533145	2.02284	0.0430899	0.40745	115.287	146.555	43.943	254.82	174.076
598	ENSG00000174442	86.3951	-1.2639	0.624028	-2.02538	0.0428279	0.40745	189.401	92.7183	56.1119	59.4199	34.3249
599	ENSG00000225272	350.347	-0.95856	0.473673	-2.02367	0.0430038	0.40745	557.222	577.246	170.364	231.966	214.939
600	ENSG00000258357	44.9809	-1.68102	0.829708	-2.02604	0.0427606	0.40745	79.6031	91.7213	14.873	23.9965	14.7107
601	ENSG00000175395	54.4376	-1.52864	0.758309	-2.01585	0.0438153	0.413366	96.0727	102.688	22.3095	33.138	17.9797
602	ENSG00000162434	335.672	0.699807	0.347546	2.01357	0.044055	0.414937	238.809	254.228	312.334	385.087	487.903
603	ENSG00000111540	173.912	-0.924142	0.459511	-2.01114	0.0443104	0.4151	314.295	179.455	150.082	126.839	98.8883
604	ENSG00000115239	62.2151	-1.15727	0.575417	-2.01119	0.044305	0.4151	71.3683	78.7607	89.2382	36.5661	35.1421
605	ENSG00000152102	153.092	-0.887712	0.44126	-2.01177	0.0442446	0.4151	207.243	223.321	132.505	99.4141	102.975
606	ENSG00000164830	96.97	-1.02165	0.508124	-2.01062	0.0443652	0.4151	150.971	116.646	97.3508	70.8468	49.0355
607	ENSG00000004534	100.802	1.05078	0.523018	2.00907	0.04453	0.41566	72.7408	41.8728	96.6747	143.979	148.741
608	ENSG00000112473	303.702	0.722964	0.360384	2.00609	0.0448463	0.41566	227.83	223.321	271.771	325.667	469.924
609	ENSG00000117394	46.2806	-1.40944	0.702038	-2.00764	0.0446813	0.41566	68.6234	82.7486	33.8023	21.7111	24.5178
610	ENSG00000119414	125.667	-1.08377	0.54084	-2.00386	0.0450848	0.41566	260.769	132.597	85.1819	75.4176	74.3705
611	ENSG00000123933	157.54	-1.03331	0.514874	-2.00693	0.0447575	0.41566	229.202	273.17	91.9424	110.841	82.5431
612	ENSG00000128272	236.998	-0.767161	0.382841	-2.00386	0.0450847	0.41566	260.769	245.255	344.784	186.259	147.924
613	ENSG00000137309	407.128	0.704462	0.351463	2.00437	0.0450304	0.41566	263.514	287.128	423.881	517.639	543.477
614	ENSG00000172915	56.863	-1.21746	0.607115	-2.00532	0.0449293	0.41566	80.9756	78.7607	61.5203	26.2819	36.7766
615	ENSG00000213853	201.08	-0.804022	0.401131	-2.00438	0.0450288	0.41566	258.024	278.155	191.997	121.125	156.096
616	ENSG00000225137	212.302	-1.12483	0.56197	-2.00157	0.0453306	0.417248	455.659	246.252	112.224	70.8468	176.528
617	ENSG00000138385	216.871	0.762783	0.381279	2.00059	0.0454366	0.417545	190.773	149.546	169.012	251.392	323.634
618	ENSG00000148773	386.091	0.639968	0.320191	1.99871	0.0456402	0.417862	304.688	325.012	317.066	481.073	502.614
619	ENSG00000166833	179.515	0.776948	0.388819	1.99823	0.0456921	0.417862	137.247	148.549	133.181	245.678	232.919
620	ENSG00000234745	73.9469	1.13223	0.566267	1.99946	0.045559	0.417862	32.9392	48.8516	67.6047	122.268	98.071
621	ENSG00000091879	82.1399	-1.11571	0.55902	-1.99583	0.0459529	0.418223	127.639	121.63	64.9005	54.8491	41.6802
622	ENSG00000109066	94.53	-1.20509	0.603769	-1.99595	0.0459393	0.418223	134.502	156.524	76.3933	25.1392	80.0913
623	ENSG00000117505	102.251	-1.02661	0.514246	-1.99635	0.0458961	0.418223	131.757	132.597	120.336	85.7018	40.8629
624	ENSG00000039523	94.5534	-1.05473	0.534632	-1.97282	0.0485164	0.418892	124.895	159.515	73.6891	58.2772	56.3908
625	ENSG00000064692	34.7425	-1.50373	0.759641	-1.97952	0.047757	0.418892	31.5668	50.8455	58.14	15.9977	17.1624
626	ENSG00000085662	182.398	1.02173	0.517861	1.97298	0.0484979	0.418892	61.761	106.676	217.687	219.397	306.472
627	ENSG00000102901	29.6326	1.6284	0.816503	1.99436	0.0461123	0.418892	13.7247	9.96971	24.3377	50.2784	49.8528
628	ENSG00000103018	39.6462	1.94189	0.987002	1.96747	0.0491293	0.418892	0	16.9485	37.8586	67.4187	76.005
629	ENSG00000105887	814.895	-0.631517	0.317896	-1.98655	0.0469723	0.418892	1218.75	819.51	811.256	596.484	628.472
630	ENSG00000106263	180.016	-0.845485	0.425013	-1.98932	0.0466662	0.418892	178.421	195.406	281.912	140.551	103.792
631	ENSG00000110700	317.783	-0.745888	0.378192	-1.97224	0.0485817	0.418892	422.72	392.806	322.474	165.69	285.223
632	ENSG00000117410	255.941	-0.726051	0.367811	-1.97398	0.0483843	0.418892	358.214	278.155	275.827	199.971	167.538
633	ENSG00000117519	232.254	-0.833958	0.419182	-1.98949	0.0466474	0.418892	380.174	283.14	182.533	157.691	157.731
634	ENSG00000127920	216.325	-0.924952	0.465031	-1.98901	0.0466999	0.418892	159.206	244.258	396.84	109.698	171.624
635	ENSG00000131188	44.5033	-1.48365	0.753964	-1.96781	0.0490903	0.418892	53.5262	90.7243	35.1544	30.8526	12.2589
636	ENSG00000132341	331.47	-0.833666	0.423633	-1.9679	0.0490797	0.418892	403.505	579.24	223.772	228.538	222.294
637	ENSG00000132780	205.733	0.882918	0.447473	1.97312	0.0484821	0.418892	130.384	100.694	229.18	314.24	254.167
638	ENSG00000136731	120.024	1.24458	0.625541	1.98961	0.0466336	0.418892	28.8218	48.8516	153.463	196.543	172.442
639	ENSG00000138448	239.194	-0.839308	0.424954	-1.97506	0.0482616	0.418892	358.214	341.961	171.716	162.262	161.817
640	ENSG00000138735	85.067	1.18577	0.602169	1.96917	0.0489331	0.418892	32.9392	91.7213	43.943	166.833	89.8984
641	ENSG00000139132	74.0561	-1.09079	0.551946	-1.97626	0.0481253	0.418892	102.935	109.667	69.6328	42.2795	45.7665
642	ENSG00000143344	55.2629	-1.25923	0.631906	-1.99274	0.0462896	0.418892	83.7205	61.8122	70.9849	20.5684	39.2284
643	ENSG00000146540	209.503	0.977701	0.491252	1.99022	0.0465664	0.418892	72.7408	144.561	233.912	357.662	238.639
644	ENSG00000148248	579.164	-0.698262	0.353823	-1.97348	0.0484409	0.418892	789.169	814.525	449.571	410.226	432.33
645	ENSG00000154277	693.679	-0.743222	0.377118	-1.97079	0.0487475	0.418892	1107.58	894.283	479.317	533.636	453.578
646	ENSG00000154734	96.2215	0.940555	0.476906	1.9722	0.0485866	0.418892	69.9958	70.7849	70.3089	130.267	139.751
647	ENSG00000158417	1521.23	0.530407	0.267599	1.98209	0.0474687	0.418892	1298.35	1332.95	1243.93	1816.88	1914.02
648	ENSG00000158526	40.9276	1.43073	0.722767	1.97952	0.0477579	0.418892	15.0971	25.9212	31.7742	46.8503	84.9949
649	ENSG00000159176	88.4009	1.06296	0.535107	1.98644	0.0469847	0.418892	39.8016	63.8061	80.4496	110.841	147.107
650	ENSG00000164111	246.442	0.842365	0.425477	1.97981	0.0477245	0.418892	131.757	153.533	274.475	378.231	294.213
651	ENSG00000168556	67.2323	-1.23429	0.620409	-1.98948	0.046648	0.418892	134.502	75.7698	52.0556	35.4234	38.4111
652	ENSG00000169604	119.949	0.922358	0.468391	1.9692	0.0489297	0.418892	76.8582	71.7819	115.604	179.402	156.096
653	ENSG00000172638	105.682	1.00321	0.506208	1.98182	0.0474995	0.418892	74.1132	48.8516	102.759	147.407	155.279
654	ENSG00000177885	221.65	0.758573	0.383524	1.9779	0.04794	0.418892	150.971	195.406	174.42	249.107	338.345
655	ENSG00000180818	142.136	1.06679	0.539588	1.97704	0.0480368	0.418892	107.052	40.8758	148.054	236.537	178.162
656	ENSG00000184867	94.3664	-1.26109	0.640044	-1.97032	0.0488015	0.418892	196.263	132.597	40.5628	58.2772	44.132
657	ENSG00000204219	43.0772	1.53671	0.776871	1.97807	0.0479203	0.418892	32.9392	32.9	8.11256	89.1299	52.3045
658	ENSG00000218426	222.654	-0.757699	0.38034	-1.99216	0.0463532	0.418892	282.728	287.128	228.504	175.974	138.934
659	ENSG00000231369	165.168	-1.15504	0.586578	-1.96911	0.0489401	0.418892	284.101	293.109	58.8161	92.5579	97.2537
660	ENSG00000237205	190.705	-1.02887	0.519299	-1.98126	0.0475622	0.418892	307.433	310.058	102.083	86.8445	147.107
661	ENSG00000255014	47.4954	-1.62107	0.818174	-1.98132	0.0475553	0.418892	131.757	38.8819	25.0137	14.855	26.9695
662	ENSG00000258741	50.1862	-1.39307	0.708019	-1.96756	0.0491187	0.418892	105.68	60.8152	33.8023	28.5673	22.066
663	ENSG00000259160	242.332	-1.01922	0.51739	-1.96992	0.0488478	0.418892	429.582	375.858	106.815	158.834	140.568
664	ENSG00000260032	134.448	0.982815	0.498463	1.97169	0.0486451	0.418892	118.032	58.8213	113.576	138.266	243.543
665	ENSG00000268623	131.4	-1.05999	0.537078	-1.97363	0.0484234	0.418892	225.085	172.476	100.055	111.984	47.401
666	ENSG00000072415	120.385	0.890559	0.45286	1.96652	0.0492383	0.419191	105.68	76.7667	87.21	150.835	181.431
667	ENSG00000067225	4089.59	-0.56731	0.288835	-1.96413	0.0495146	0.420004	4601.88	3877.22	5622.68	3578.91	2767.24
668	ENSG00000099942	77.8658	-1.09548	0.558164	-1.96264	0.0496876	0.420004	122.15	110.664	64.2245	45.7076	46.5837
669	ENSG00000131495	87.5413	-1.18429	0.603461	-1.9625	0.0497042	0.420004	115.287	165.497	57.464	65.1334	34.3249
670	ENSG00000150459	168.666	-0.887224	0.451841	-1.96358	0.0495794	0.420004	260.769	231.297	128.449	105.128	117.685
671	ENSG00000214160	203.303	1.11533	0.568178	1.96299	0.049647	0.420004	68.6234	74.7728	271.095	228.538	373.487
672	ENSG00000228300	79.1637	-1.03722	0.529177	-1.96005	0.0499894	0.421785	111.17	98.7001	89.2382	41.1369	55.5736
673	ENSG00000125826	94.0816	-0.966518	0.493324	-1.9592	0.0500899	0.422005	107.052	114.652	129.125	52.5638	67.0152
674	ENSG00000137573	90.6824	1.32876	0.678725	1.95773	0.050262	0.422827	108.425	46.8576	15.5491	148.55	134.03
675	ENSG00000104131	229.307	0.767877	0.392684	1.95546	0.0505289	0.423815	194.89	154.53	187.265	373.66	236.188
676	ENSG00000133687	96.3362	1.07526	0.549698	1.95609	0.0504542	0.423815	35.6842	88.7304	75.0412	170.261	111.964
677	ENSG00000134265	86.8884	1.43425	0.734237	1.95339	0.0507733	0.423983	6.86234	55.8304	91.2663	126.839	153.645
678	ENSG00000139289	150.675	-0.920227	0.471075	-1.95346	0.0507649	0.423983	129.012	163.503	264.334	84.5591	111.964
679	ENSG00000204070	154.528	-0.870186	0.44529	-1.9542	0.0506774	0.423983	212.732	225.315	128.449	103.985	102.157
680	ENSG00000114439	997.998	-0.641217	0.328685	-1.95086	0.051074	0.425828	1324.43	1375.82	796.383	715.324	778.03
681	ENSG00000219149	199.259	-0.941573	0.482792	-1.95027	0.0511444	0.425828	336.255	286.131	117.632	139.408	116.868
682	ENSG00000117020	161.647	-0.831493	0.426513	-1.94951	0.0512341	0.425949	222.34	207.37	158.195	127.981	92.3502
683	ENSG00000113810	426.407	0.64862	0.332988	1.94788	0.0514292	0.426321	297.825	324.015	419.825	519.924	570.446
684	ENSG00000115904	43.2143	1.42898	0.733564	1.94799	0.051416	0.426321	10.9797	29.9091	35.8305	55.9918	83.3604
685	ENSG00000152700	60.7288	-1.13521	0.583167	-1.94663	0.051579	0.426938	87.8379	74.7728	70.3089	38.8515	31.8731
686	ENSG00000136824	176.845	0.904637	0.465359	1.94396	0.0519008	0.428976	129.012	80.7546	183.209	195.4	295.848
687	ENSG00000006025	39.0432	-1.74842	0.900813	-1.94093	0.0522662	0.42901	60.3886	86.7364	16.2251	5.71345	26.1523
688	ENSG00000109099	134.447	0.87272	0.449691	1.94071	0.0522935	0.42901	113.915	115.649	73.6891	196.543	172.442
689	ENSG00000111530	198.235	-0.836676	0.430676	-1.9427	0.0520519	0.42901	215.477	335.979	170.364	139.408	129.944
690	ENSG00000143786	45.0282	-1.99507	1.02789	-1.94094	0.052265	0.42901	32.9392	28.9121	130.477	31.9953	0.817258
691	ENSG00000168028	113.683	0.994791	0.512474	1.94116	0.0522395	0.42901	54.8987	70.7849	117.632	131.409	193.69
692	ENSG00000183160	127.359	-0.94119	0.485107	-1.94017	0.0523589	0.42901	190.773	182.446	100.055	71.9895	91.5329
693	ENSG00000166887	42.6415	-1.50172	0.775044	-1.9376	0.052672	0.430953	97.4452	47.8546	27.7179	14.855	25.335
694	ENSG00000226396	196.956	-0.85721	0.442613	-1.9367	0.0527816	0.431227	288.218	276.161	155.491	161.119	103.792
695	ENSG00000005884	173.909	-0.800827	0.413911	-1.93478	0.053017	0.432277	190.773	260.209	177.8	127.981	112.782
696	ENSG00000092964	329.147	-0.798344	0.412706	-1.93441	0.0530626	0.432277	481.736	487.519	221.067	227.395	228.015
697	ENSG00000065000	995.126	0.579824	0.299996	1.93278	0.0532639	0.433295	742.505	830.477	918.072	1435.22	1049.36
698	ENSG00000072110	1813.11	-0.634275	0.328474	-1.93098	0.0534858	0.434464	2495.15	2460.52	1386.57	1490.07	1233.24
699	ENSG00000077312	573.627	-0.86038	0.445707	-1.93037	0.0535609	0.434464	1007.39	772.652	319.094	286.815	482.182
700	ENSG00000124802	58.4304	-1.22817	0.637449	-1.92669	0.0540184	0.435759	102.935	80.7546	43.943	34.2807	30.2386
701	ENSG00000143891	83.8638	1.05518	0.547367	1.92774	0.0538875	0.435759	43.919	45.8606	85.1819	129.124	115.233
702	ENSG00000156504	62.665	-1.20913	0.627955	-1.9255	0.0541663	0.435759	104.308	86.7364	52.0556	45.7076	24.5178
703	ENSG00000159216	118.685	-0.959806	0.498661	-1.92477	0.0542586	0.435759	188.028	128.609	125.069	99.4141	52.3045
704	ENSG00000164611	106.724	-1.00215	0.520641	-1.92484	0.0542496	0.435759	116.66	185.437	98.7028	50.2784	82.5431
705	ENSG00000171159	164.735	-0.964665	0.50083	-1.92613	0.0540879	0.435759	307.433	190.421	116.28	130.267	79.2741
706	ENSG00000213787	1760.01	-0.868048	0.450629	-1.9263	0.0540665	0.435759	3005.7	2673.88	767.313	950.718	1402.42
707	ENSG00000006125	237.489	-0.799121	0.415851	-1.92165	0.0546494	0.435812	336.255	313.049	210.251	121.125	206.766
708	ENSG00000058091	306.223	-0.726712	0.378103	-1.922	0.0546064	0.435812	473.501	345.949	272.447	236.537	202.68
709	ENSG00000105723	151.358	-0.923547	0.480067	-1.92379	0.0543811	0.435812	238.809	215.346	106.139	107.413	89.0812
710	ENSG00000149091	194.764	-0.973728	0.50635	-1.92303	0.054476	0.435812	402.133	207.37	118.308	117.697	128.31
711	ENSG00000158545	80.5953	1.051	0.546702	1.92244	0.0545503	0.435812	56.2712	42.8697	69.6328	145.122	89.0812
712	ENSG00000103653	121.443	-0.928124	0.483321	-1.92031	0.0548193	0.435941	193.518	106.676	149.406	91.4152	66.1979
713	ENSG00000113916	102.531	-1.04001	0.541494	-1.92062	0.0547791	0.435941	146.854	168.488	72.337	51.4211	73.5533
714	ENSG00000167601	748.549	-0.653851	0.340624	-1.91957	0.0549124	0.436069	1084.25	918.21	626.695	638.764	474.827
715	ENSG00000005483	911.462	-0.63966	0.333382	-1.9187	0.0550224	0.436268	1291.49	1166.46	734.187	741.606	623.568
716	ENSG00000006607	44.7996	1.3444	0.700884	1.91816	0.0550913	0.436268	32.9392	14.9546	35.1544	84.5591	56.3908
717	ENSG00000103429	179.133	0.995821	0.520086	1.91472	0.0555276	0.438433	48.0364	152.537	182.533	273.103	239.457
718	ENSG00000189043	64.0795	-1.18021	0.61643	-1.91458	0.0555457	0.438433	119.405	77.7637	50.7035	36.5661	35.9594
719	ENSG00000257103	74.7577	-1.09386	0.571448	-1.91418	0.0555966	0.438433	118.032	95.7092	71.661	31.9953	56.3908
720	ENSG00000143458	45.1496	1.45389	0.76096	1.9106	0.056056	0.440629	10.9797	19.9394	47.9993	87.9872	58.8426
721	ENSG00000144867	135.542	1.13804	0.595699	1.91043	0.0560776	0.440629	54.8987	42.8697	175.772	162.262	241.908
722	ENSG00000187498	170.685	0.769703	0.402945	1.91019	0.0561083	0.440629	146.854	110.664	141.97	230.823	223.112
723	ENSG00000044574	1385.68	-0.56447	0.296035	-1.90677	0.0565507	0.440631	1664.8	1776.6	1335.19	926.722	1225.07
724	ENSG00000113369	33.6694	1.60195	0.839987	1.90712	0.0565054	0.440631	9.60727	35.8909	10.1407	57.1345	55.5736
725	ENSG00000122299	153.543	-0.832535	0.436629	-1.90673	0.056555	0.440631	233.319	168.488	156.843	119.982	89.0812
726	ENSG00000204356	548.573	-0.684086	0.358244	-1.90955	0.0561907	0.440631	786.424	695.886	456.332	476.502	327.721
727	ENSG00000213089	63.666	-1.42417	0.746976	-1.90658	0.0565748	0.440631	111.17	122.627	21.6335	22.8538	40.0457
728	ENSG00000220848	32.9411	-1.73121	0.906884	-1.90896	0.0562673	0.440631	72.7408	50.8455	13.5209	19.4257	8.17258
729	ENSG00000143614	257.968	-0.776291	0.407439	-1.9053	0.0567415	0.441058	307.433	415.737	205.518	186.259	174.893
730	ENSG00000164576	61.1767	-1.23854	0.650164	-1.90496	0.0567853	0.441058	60.3886	125.618	52.7317	26.2819	40.8629
731	ENSG00000113384	51.8738	-1.42887	0.75051	-1.90386	0.0569285	0.441353	113.915	68.791	25.6898	18.283	32.6903
732	ENSG00000153310	73.61	-1.17534	0.617469	-1.90347	0.0569789	0.441353	107.052	125.618	52.0556	28.5673	54.7563
733	ENSG00000167671	93.5729	-1.05769	0.556322	-1.90122	0.0572736	0.442427	83.7205	185.437	85.1819	57.1345	56.3908
734	ENSG00000185215	80.2249	1.11533	0.586618	1.90129	0.0572636	0.442427	41.174	40.8758	81.1256	155.406	82.5431
735	ENSG00000141258	105.32	-1.00976	0.531544	-1.89968	0.0574751	0.44338	166.069	157.521	72.337	68.5614	62.1116
736	ENSG00000020129	365.931	-0.656157	0.345628	-1.89845	0.0576368	0.443827	392.526	366.885	525.964	263.961	280.32
737	ENSG00000237170	444.967	-0.983625	0.518229	-1.89805	0.0576896	0.443827	870.144	631.082	163.603	238.822	321.183
738	ENSG00000185896	272.161	0.708182	0.373279	1.89719	0.0578025	0.444092	211.36	197.4	242.701	281.102	428.243
739	ENSG00000128951	70.2264	1.03008	0.543494	1.8953	0.0580526	0.44541	41.174	53.8364	53.4077	100.557	102.157
740	ENSG00000088854	35.302	-1.84099	0.972158	-1.89372	0.0582622	0.446353	98.8177	6.97879	43.267	10.2842	17.1624
741	ENSG00000146263	33.405	1.42547	0.752948	1.89319	0.0583329	0.446353	23.3319	16.9485	19.6054	66.276	40.8629
742	ENSG00000161547	432.251	-0.860172	0.454726	-1.89163	0.0585409	0.447341	697.214	667.97	216.335	276.531	303.203
743	ENSG00000157637	76.2894	1.02762	0.54391	1.88933	0.0588483	0.449084	65.8784	37.8849	58.14	105.128	114.416
744	ENSG00000107249	81.6205	-1.1163	0.592805	-1.88308	0.0596893	0.45111	96.0727	159.515	56.7879	43.4222	52.3045
745	ENSG00000128714	46.7787	-1.31155	0.695997	-1.88442	0.0595087	0.45111	64.506	84.7425	35.1544	27.4246	22.066
746	ENSG00000135655	63.9025	-1.19341	0.633113	-1.88499	0.0594312	0.45111	127.639	49.8485	70.3089	30.8526	40.8629
747	ENSG00000143013	592.258	-0.719092	0.381976	-1.88256	0.0597605	0.45111	936.023	745.734	427.262	355.377	496.893
748	ENSG00000160753	181.895	-0.804039	0.42665	-1.88454	0.059492	0.45111	269.004	235.285	154.139	138.266	112.782
749	ENSG00000165434	40.6531	-1.57436	0.83449	-1.88662	0.0592121	0.45111	38.4291	19.9394	107.491	19.4257	17.9797
750	ENSG00000172500	343.927	-0.692225	0.367591	-1.88314	0.0596816	0.45111	407.623	512.443	297.461	265.104	237.005
751	ENSG00000180008	34.8595	1.42948	0.759535	1.88205	0.0598298	0.45111	10.9797	25.9212	25.0137	55.9918	56.3908
752	ENSG00000235803	94.3741	-1.28755	0.683897	-1.88267	0.0597449	0.45111	185.283	155.527	30.4221	37.7088	62.9289
753	ENSG00000106624	127.413	0.942403	0.501052	1.88085	0.0599926	0.451737	61.761	73.7758	142.646	172.546	186.335
754	ENSG00000205730	686.245	-0.61595	0.327609	-1.88014	0.0600888	0.451861	914.063	898.271	579.372	533.636	505.883
755	ENSG00000122958	95.8419	0.929659	0.495028	1.87799	0.0603824	0.453468	76.8582	53.8364	80.4496	123.411	144.655
756	ENSG00000235297	159.359	-1.00388	0.535021	-1.87634	0.0606082	0.454562	308.805	207.37	82.4777	95.986	102.157
757	ENSG00000005073	146.488	0.772609	0.412648	1.87232	0.0611626	0.455406	109.797	117.643	114.928	193.115	196.959
758	ENSG00000085982	91.8118	0.931322	0.497776	1.87097	0.0613495	0.455406	78.2306	68.791	55.4358	140.551	116.051
759	ENSG00000123178	75.4312	-1.02795	0.549026	-1.87231	0.061164	0.455406	118.032	85.7395	80.4496	53.7065	39.2284
760	ENSG00000137547	49.782	-1.24959	0.667268	-1.87269	0.0611106	0.455406	38.4291	82.7486	73.0131	28.5673	26.1523
761	ENSG00000143153	30.8501	-1.47998	0.791066	-1.87087	0.0613633	0.455406	32.9392	40.8758	50.7035	12.5696	17.1624
762	ENSG00000166164	173.342	0.883477	0.472162	1.87113	0.0613271	0.455406	109.797	79.7577	198.082	255.963	223.112
763	ENSG00000181467	126.941	-1.13643	0.607178	-1.87167	0.0612528	0.455406	186.656	246.252	54.7598	51.4211	95.6192
764	ENSG00000253667	56.4628	-1.36086	0.726996	-1.8719	0.0612204	0.455406	76.8582	114.652	33.1263	15.9977	41.6802
765	ENSG00000142676	3665.14	-0.733467	0.392192	-1.87017	0.0614597	0.455525	6158.26	4817.36	2106.56	2177.97	3065.54
766	ENSG00000116132	1554.23	-0.617092	0.330558	-1.86682	0.0619272	0.457793	1940.67	1569.23	1905.78	1541.49	813.989
767	ENSG00000143947	1646.06	-0.625939	0.335275	-1.86694	0.0619094	0.457793	1497.36	1820.47	2429.71	926.722	1556.06
768	ENSG00000103647	42.536	-1.29153	0.692949	-1.86381	0.0623485	0.460307	52.1538	66.797	47.9993	28.5673	17.1624
769	ENSG00000125746	35.8714	1.50884	0.809967	1.86284	0.0624844	0.460537	6.86234	21.9334	32.4503	50.2784	67.8324
770	ENSG00000243279	137.275	-0.835492	0.448602	-1.86243	0.062542	0.460537	177.048	198.397	124.393	98.2714	88.2639
771	ENSG00000008282	98.4161	-1.12653	0.605586	-1.86023	0.0628533	0.462228	139.992	188.427	48.6754	65.1334	49.8528
772	ENSG00000006534	135.86	0.892995	0.480644	1.85791	0.0631811	0.462845	71.3683	88.7304	142.646	154.263	222.294
773	ENSG00000089737	501.717	0.763222	0.410741	1.85816	0.0631468	0.462845	274.494	283.14	617.907	559.918	773.126
774	ENSG00000119820	87.7842	1.28201	0.690163	1.85754	0.063234	0.462845	12.3522	51.8425	102.083	122.268	150.376
775	ENSG00000174807	150.048	0.812967	0.437707	1.85733	0.0632637	0.462845	108.425	145.558	91.9424	177.117	227.198
776	ENSG00000181026	68.267	-1.04426	0.562674	-1.85588	0.0634702	0.463758	100.19	70.7849	87.21	36.5661	46.5837
777	ENSG00000074800	1125.3	0.587431	0.316706	1.85482	0.0636226	0.463913	915.436	814.525	1081	1093.55	1721.96
778	ENSG00000150961	275.171	-0.685433	0.369588	-1.85459	0.0636551	0.463913	344.489	375.858	252.842	188.544	214.122
779	ENSG00000085377	94.1782	-1.17168	0.632441	-1.85263	0.0639357	0.464989	134.502	185.437	43.943	39.9942	67.0152
780	ENSG00000108840	70.8972	-1.20058	0.648315	-1.85184	0.0640487	0.464989	96.0727	136.585	42.591	28.5673	50.67
781	ENSG00000172809	604.258	0.623233	0.336535	1.85192	0.064038	0.464989	457.032	433.682	599.654	609.054	921.867
782	ENSG00000124313	71.0375	-1.08776	0.588157	-1.84944	0.064394	0.46537	91.9553	120.633	58.14	35.4234	49.0355
783	ENSG00000128709	50.5429	-1.18899	0.642979	-1.8492	0.0644295	0.46537	69.9958	71.7819	54.0838	21.7111	35.1421
784	ENSG00000228462	116.389	-0.941404	0.508721	-1.85053	0.0642373	0.46537	170.186	178.458	83.8298	68.5614	80.9086
785	ENSG00000236248	131.33	-1.19155	0.643969	-1.85031	0.0642682	0.46537	203.125	261.206	44.6191	47.993	99.7055
786	ENSG00000087266	55.0057	1.28649	0.697537	1.84434	0.0651337	0.465451	24.7044	19.9394	59.4921	60.5626	110.33
787	ENSG00000106244	352.596	0.631135	0.341908	1.84592	0.0649039	0.465451	310.178	322.022	235.94	427.366	467.472
788	ENSG00000125691	2251.69	-0.565031	0.306287	-1.84478	0.06507	0.465451	3203.34	2679.86	1878.73	1820.31	1676.2
789	ENSG00000141753	607.881	0.801603	0.434703	1.84402	0.0651796	0.465451	260.769	341.961	801.116	838.735	796.827
790	ENSG00000146373	32.6349	-1.42809	0.773839	-1.84546	0.0649712	0.465451	46.6639	49.8485	34.4784	12.5696	19.6142
791	ENSG00000156052	175.68	-0.767612	0.4156	-1.847	0.0647474	0.465451	225.085	243.261	162.927	135.98	111.147
792	ENSG00000160014	308.741	-0.874945	0.473946	-1.84609	0.0648797	0.465451	627.218	310.058	196.054	166.833	243.543
793	ENSG00000175216	218.479	0.684758	0.370665	1.84738	0.0646926	0.465451	168.814	169.485	188.617	303.956	261.523
794	ENSG00000259207	58.2871	-1.20644	0.653923	-1.84493	0.0650474	0.465451	37.0566	92.7183	95.9987	35.4234	30.2386
795	ENSG00000137776	250.808	0.702697	0.381217	1.8433	0.065285	0.465617	167.441	189.424	244.053	278.816	374.304
796	ENSG00000075618	219.802	0.730927	0.39715	1.84043	0.0657053	0.465686	129.012	185.437	206.194	323.381	254.985
797	ENSG00000076108	278.699	0.703359	0.38195	1.8415	0.0655489	0.465686	157.834	277.158	232.56	339.379	386.563
798	ENSG00000117523	1747.49	0.486924	0.264522	1.84077	0.065655	0.465686	1474.03	1484.49	1558.29	2150.54	2070.12
799	ENSG00000183011	291.389	-0.689372	0.374278	-1.84187	0.0654936	0.465686	432.327	338.97	260.278	202.256	223.112
800	ENSG00000203914	111.346	-1.0626	0.576739	-1.84243	0.0654119	0.465686	218.222	142.567	61.5203	78.8456	55.5736
801	ENSG00000136379	167.277	-0.813412	0.442299	-1.83905	0.0659072	0.466534	260.769	200.391	146.026	95.986	133.213
802	ENSG00000155876	112.075	-0.974973	0.530514	-1.83779	0.0660933	0.467268	167.441	178.458	73.0131	66.276	75.1878
803	ENSG00000148180	89.6938	0.997103	0.54358	1.83433	0.0666053	0.470302	60.3886	43.8667	87.8861	99.4141	156.914
804	ENSG00000100219	92.959	-1.03324	0.563809	-1.83261	0.0668609	0.470349	186.656	88.7304	75.7173	54.8491	58.8426
805	ENSG00000177981	68.4234	1.2067	0.65831	1.83303	0.0667985	0.470349	16.4696	73.7758	43.943	113.126	94.802
806	ENSG00000196569	54.6192	1.19921	0.654185	1.83314	0.066782	0.470349	54.8987	32.9	20.9575	71.9895	92.3502
807	ENSG00000198356	61.7973	1.06234	0.58042	1.8303	0.0672058	0.47144	42.5465	43.8667	42.591	109.698	70.2842
808	ENSG00000198646	67.555	-1.08125	0.590747	-1.83031	0.0672042	0.47144	113.915	87.7334	55.4358	42.2795	38.4111
809	ENSG00000242372	304.627	0.762091	0.416467	1.8299	0.0672655	0.47144	163.324	217.34	333.291	307.384	501.797
810	ENSG00000123496	45.3727	-1.29254	0.707736	-1.82631	0.067804	0.473206	43.919	45.8606	88.5621	18.283	30.2386
811	ENSG00000148925	123.39	-0.843476	0.462068	-1.82544	0.0679347	0.473206	156.461	179.455	114.252	77.7029	89.0812
812	ENSG00000156587	56.6376	1.30546	0.714652	1.8267	0.0677449	0.473206	15.0971	23.9273	66.9286	85.7018	91.5329
813	ENSG00000177380	46.9241	-1.22932	0.673429	-1.82546	0.0679311	0.473206	68.6234	71.7819	42.591	20.5684	31.0558
814	ENSG00000206527	217.391	-0.873528	0.478054	-1.82726	0.0676611	0.473206	384.291	286.131	127.097	155.406	134.03
815	ENSG00000067533	95.4915	1.05196	0.577362	1.82202	0.0684522	0.473364	52.1538	35.8909	111.548	129.124	148.741
816	ENSG00000104852	96.9487	-1.04058	0.571302	-1.82143	0.0685418	0.473364	150.971	157.521	58.14	50.2784	67.8324
817	ENSG00000125868	1027.69	-0.509458	0.279274	-1.82422	0.0681183	0.473364	1213.26	1206.33	1080.32	803.311	835.238
818	ENSG00000149218	234.161	-0.792812	0.434999	-1.82256	0.0683697	0.473364	363.704	317.037	165.631	140.551	183.883
819	ENSG00000163704	35.5188	1.58159	0.867665	1.82281	0.0683326	0.473364	10.9797	6.97879	40.5628	65.1334	53.9391
820	ENSG00000179222	588.615	-0.745914	0.409436	-1.82181	0.068484	0.473364	1089.74	627.095	390.079	425.081	411.081
821	ENSG00000196628	418.956	-0.798709	0.438046	-1.82334	0.0682516	0.473364	830.343	401.779	283.264	286.815	292.578
822	ENSG00000182831	73.0527	-1.00259	0.551018	-1.81952	0.0688314	0.474209	113.915	79.7577	80.4496	50.2784	40.8629
823	ENSG00000229833	46.1092	-1.29877	0.713587	-1.82006	0.0687501	0.474209	64.506	84.7425	32.4503	19.4257	29.4213
824	ENSG00000005206	34.2232	-1.74097	0.959449	-1.81456	0.0695922	0.475706	35.6842	97.7031	9.46466	10.2842	17.9797
825	ENSG00000100316	1366.1	-0.7518	0.413982	-1.81602	0.069367	0.475706	2161.64	1989.95	742.976	765.603	1170.31
826	ENSG00000130164	174.154	-0.994704	0.547285	-1.81753	0.0691367	0.475706	323.902	251.237	77.7454	122.268	95.6192
827	ENSG00000164405	285.673	-0.693004	0.38187	-1.81477	0.0695599	0.475706	249.789	416.734	344.784	181.688	235.37
828	ENSG00000168439	222.801	-0.697983	0.384298	-1.81626	0.0693312	0.475706	214.105	315.043	260.278	155.406	169.172
829	ENSG00000198837	46.2216	-1.32697	0.731406	-1.81427	0.069636	0.475706	102.935	46.8576	33.1263	22.8538	25.335
830	ENSG00000240270	83.2473	-1.19816	0.660098	-1.81512	0.0695048	0.475706	142.737	136.585	43.943	25.1392	67.8324
831	ENSG00000168874	77.0724	0.970928	0.535551	1.81295	0.0698392	0.47652	52.1538	44.8637	69.6328	116.554	102.157
832	ENSG00000127184	213.059	-0.671914	0.370972	-1.81122	0.0701062	0.476621	255.279	255.224	240.673	153.121	161
833	ENSG00000164180	73.2983	-1.14144	0.629869	-1.81219	0.0699568	0.476621	112.542	128.609	40.5628	42.2795	42.4974
834	ENSG00000204209	158.418	0.872268	0.481573	1.81129	0.0700959	0.476621	76.8582	100.694	177.8	259.391	177.345
835	ENSG00000163468	892.211	-0.637269	0.35235	-1.80863	0.0705089	0.478785	1236.59	1213.31	674.019	559.918	777.213
836	ENSG00000130770	143.76	-0.784522	0.434072	-1.80735	0.0707073	0.47933	171.558	179.455	167.66	79.9883	120.137
837	ENSG00000164091	341.706	0.673423	0.373005	1.8054	0.0710118	0.47933	247.044	228.306	351.544	524.495	357.142
838	ENSG00000171858	946.131	-0.729443	0.403961	-1.80573	0.0709611	0.47933	1622.26	1207.33	545.57	638.764	716.736
839	ENSG00000213970	92.2072	-1.08375	0.600175	-1.80572	0.0709614	0.47933	183.911	98.7001	68.9568	34.2807	75.1878
840	ENSG00000214753	340.842	-0.749577	0.415002	-1.8062	0.0708871	0.47933	558.594	404.77	258.25	185.116	297.482
841	ENSG00000139233	173.08	1.13868	0.631403	1.80341	0.0713235	0.480168	21.9595	150.543	177.124	189.687	326.086
842	ENSG00000175048	145.007	-0.787237	0.436486	-1.80358	0.071297	0.480168	188.028	187.43	147.378	118.84	83.3604
843	ENSG00000238111	61.2303	-1.47636	0.818839	-1.80299	0.0713901	0.480168	112.542	122.627	12.1688	22.8538	35.9594
844	ENSG00000253954	32.2116	-1.57482	0.87403	-1.80179	0.071578	0.480862	57.6436	59.8182	14.197	17.1404	12.2589
845	ENSG00000174444	149.25	0.749839	0.416403	1.80075	0.071742	0.481393	109.797	132.597	109.52	185.116	209.218
846	ENSG00000149100	61.5936	1.17535	0.653417	1.79878	0.0720543	0.482917	37.0566	21.9334	63.5484	68.5614	116.868
847	ENSG00000079387	46.0205	-1.24436	0.69202	-1.79815	0.0721527	0.483006	34.3117	70.7849	74.3652	22.8538	27.7868
848	ENSG00000228929	423.079	-0.600408	0.334023	-1.79751	0.0722553	0.483122	446.052	560.297	462.416	367.946	278.685
849	ENSG00000134371	530.611	-0.678038	0.377771	-1.79484	0.0726794	0.484443	764.464	738.755	370.474	363.376	415.984
850	ENSG00000187837	74.845	1.01911	0.567951	1.79437	0.0727548	0.484443	76.8582	34.894	47.9993	107.413	107.061
851	ENSG00000226137	32.3401	1.42625	0.794625	1.79487	0.0726747	0.484443	15.0971	11.9636	30.4221	50.2784	53.9391
852	ENSG00000226144	160.229	-1.08462	0.604542	-1.79412	0.0727946	0.484443	345.862	200.391	64.2245	63.9907	126.675
853	ENSG00000051128	102.884	-1.00709	0.561559	-1.79338	0.0729121	0.484656	82.3481	112.658	191.321	42.2795	85.8121
854	ENSG00000119801	116.556	-0.94005	0.524357	-1.79277	0.07301	0.484738	227.83	99.6971	105.463	75.4176	74.3705
855	ENSG00000214253	103.892	-0.86438	0.4825	-1.79146	0.0732191	0.485558	139.992	139.576	100.731	75.4176	63.7462
856	ENSG00000171467	374.361	-0.691881	0.386396	-1.7906	0.0733575	0.485908	586.044	455.616	283.94	293.671	252.533
857	ENSG00000123836	42.344	-1.49527	0.835525	-1.78961	0.073516	0.486371	104.308	50.8455	16.2251	23.9965	16.3452
858	ENSG00000198830	62.4131	1.10032	0.615014	1.7891	0.073599	0.486371	60.3886	43.8667	25.0137	82.2737	100.523
859	ENSG00000025770	177.867	-0.833462	0.466412	-1.78697	0.0739427	0.486838	315.668	197.4	134.533	137.123	104.609
860	ENSG00000139579	47.7878	1.50437	0.842309	1.786	0.074099	0.486838	4.1174	24.9243	52.7317	58.2772	98.8883
861	ENSG00000145431	196.77	-0.733603	0.410503	-1.78708	0.073924	0.486838	172.931	249.243	279.883	125.696	156.096
862	ENSG00000166033	363.146	-0.585999	0.328045	-1.78634	0.0740443	0.486838	403.505	411.749	442.135	261.676	296.665
863	ENSG00000178074	47.8562	-1.15332	0.645103	-1.7878	0.073808	0.486838	52.1538	73.7758	58.14	27.4246	27.7868
864	ENSG00000011007	100.849	0.890696	0.499317	1.78383	0.0744515	0.487532	102.935	63.8061	59.4921	143.979	134.03
865	ENSG00000035928	119.781	0.922923	0.517403	1.78376	0.0744625	0.487532	45.2914	93.7152	124.393	173.689	161.817
866	ENSG00000106771	91.871	0.920884	0.516162	1.7841	0.0744074	0.487532	48.0364	65.8001	88.5621	118.84	138.117
867	ENSG00000055147	36.2901	1.30185	0.730443	1.78228	0.0747038	0.487985	19.2145	17.9455	31.0982	61.7053	51.4873
868	ENSG00000183696	107.13	-0.836116	0.469022	-1.78268	0.0746384	0.487985	111.17	143.564	135.209	69.7041	76.005
869	ENSG00000138771	65.02	-1.01277	0.568447	-1.78165	0.0748063	0.488091	74.1132	72.7789	97.3508	39.9942	40.8629
870	ENSG00000008294	252.468	0.725985	0.409426	1.77318	0.076199	0.488468	141.364	186.434	271.095	383.944	279.502
871	ENSG00000088247	613.398	0.602555	0.339739	1.77358	0.0761322	0.488468	380.174	472.564	669.962	762.175	782.116
872	ENSG00000090863	327.86	0.606711	0.341491	1.77665	0.0756254	0.488468	242.927	274.167	296.109	372.517	453.578
873	ENSG00000107863	515.674	-0.661173	0.3725	-1.77496	0.0759044	0.488468	824.853	603.167	386.699	377.088	386.563
874	ENSG00000111962	34.2993	-1.50768	0.851013	-1.77163	0.0764562	0.488468	61.761	58.8213	18.2533	22.8538	9.8071
875	ENSG00000129235	64.4077	-1.03343	0.5818	-1.77626	0.07569	0.488468	79.6031	90.7243	72.337	49.1357	30.2386
876	ENSG00000131711	2750.08	0.507973	0.287022	1.76981	0.0767592	0.488468	1865.18	2374.78	2817.09	3440.64	3252.69
877	ENSG00000136717	30.1459	1.37736	0.77407	1.77937	0.0751795	0.488468	16.4696	18.9424	19.6054	54.8491	40.8629
878	ENSG00000148660	140.648	-1.00704	0.56686	-1.77652	0.0756479	0.488468	192.145	264.197	71.661	113.126	62.1116
879	ENSG00000152291	946.168	0.746645	0.421703	1.77055	0.0766356	0.488468	403.505	574.255	1253.39	1126.69	1372.99
880	ENSG00000157916	121.567	-0.82734	0.465731	-1.77643	0.0756616	0.488468	131.757	170.482	139.942	65.1334	100.523
881	ENSG00000162065	48.8356	-1.1571	0.651743	-1.7754	0.0758326	0.488468	74.1132	50.8455	62.8724	34.2807	22.066
882	ENSG00000163655	112.965	0.866706	0.488665	1.77362	0.0761261	0.488468	63.1335	84.7425	106.139	187.401	123.406
883	ENSG00000166710	1072.42	0.603929	0.339391	1.77945	0.075166	0.488468	583.299	920.204	1158.07	1427.22	1273.29
884	ENSG00000167325	91.4628	0.865452	0.487462	1.77542	0.0758278	0.488468	69.9958	66.797	69.6328	134.837	116.051
885	ENSG00000173039	251.619	-0.829625	0.468339	-1.77142	0.0764906	0.488468	454.287	311.055	150.082	193.115	149.558
886	ENSG00000175348	46.1434	-1.1489	0.648728	-1.771	0.0765607	0.488468	65.8784	56.8273	54.7598	26.2819	26.9695
887	ENSG00000180801	39.1486	1.40716	0.795066	1.76987	0.0767491	0.488468	6.86234	25.9212	37.1826	62.848	62.9289
888	ENSG00000185236	100.066	-0.92768	0.523118	-1.77337	0.0761681	0.488468	168.814	105.679	95.9987	79.9883	49.8528
889	ENSG00000185551	700.355	0.772533	0.434152	1.7794	0.0751734	0.488468	240.182	644.043	751.088	1135.83	730.629
890	ENSG00000189067	197.033	0.704135	0.397386	1.77192	0.0764085	0.488468	188.028	160.512	124.393	271.96	240.274
891	ENSG00000218476	54.9316	-1.47526	0.83077	-1.77577	0.075771	0.488468	163.324	24.9243	33.8023	18.283	34.3249
892	ENSG00000103769	205.794	-0.794078	0.449653	-1.76598	0.0773989	0.489102	325.275	268.185	150.758	113.126	171.624
893	ENSG00000122641	506.446	-0.836746	0.473912	-1.76561	0.0774609	0.489102	245.672	558.304	1039.08	333.666	355.507
894	ENSG00000134453	352.338	0.585094	0.33104	1.76744	0.0771547	0.489102	270.376	307.067	302.869	471.931	409.446
895	ENSG00000134825	110.018	-0.823411	0.465961	-1.76712	0.0772075	0.489102	112.542	149.546	137.238	78.8456	71.9187
896	ENSG00000166938	34.35	1.79728	1.01771	1.76601	0.0773938	0.489102	10.9797	0.996971	39.2107	50.2784	70.2842
897	ENSG00000205871	125.38	-0.773775	0.438214	-1.76575	0.0774382	0.489102	155.089	150.543	145.35	92.5579	83.3604
898	ENSG00000213862	282.11	-0.991341	0.561475	-1.7656	0.0774628	0.489102	597.023	358.909	101.407	132.552	220.66
899	ENSG00000148700	91.9742	0.978821	0.554703	1.76458	0.0776336	0.489443	34.3117	70.7849	92.6184	142.836	119.32
900	ENSG00000167522	689.758	0.600783	0.340531	1.76425	0.0776894	0.489443	414.485	569.27	729.455	974.715	760.868
901	ENSG00000185043	55.987	-1.11028	0.629511	-1.76372	0.0777798	0.489469	72.7408	82.7486	58.14	43.4222	22.8832
902	ENSG00000063177	2075.06	-0.664632	0.377779	-1.75931	0.0785244	0.489746	3394.11	2643.97	1266.91	1382.66	1687.64
903	ENSG00000074964	80.1884	-1.21165	0.688602	-1.75958	0.0784787	0.489746	139.992	144.561	27.0419	46.8503	42.4974
904	ENSG00000087111	77.7586	-1.02666	0.585166	-1.75447	0.0793499	0.489746	142.737	93.7152	56.7879	51.4211	44.132
905	ENSG00000089597	119.561	0.806054	0.459052	1.75591	0.0791039	0.489746	93.3278	102.688	80.4496	132.552	188.787
906	ENSG00000100281	195.459	0.773258	0.442422	1.74778	0.0805014	0.489746	182.538	87.7334	186.589	249.107	271.33
907	ENSG00000100614	171.227	-0.891341	0.50869	-1.75223	0.0797344	0.489746	340.372	179.455	110.872	97.1287	128.31
908	ENSG00000103187	92.1603	0.935029	0.531462	1.75935	0.0785175	0.489746	85.093	39.8788	77.7454	131.409	126.675
909	ENSG00000103550	142.206	0.807176	0.45832	1.76116	0.0782108	0.489746	72.7408	122.627	131.829	217.111	166.721
910	ENSG00000111142	2162.23	0.514746	0.293311	1.75495	0.0792684	0.489746	2079.29	1458.57	1999.07	2934.43	2339.81
911	ENSG00000115233	207.984	-0.673063	0.384753	-1.74934	0.0802322	0.489746	278.611	203.382	251.489	151.978	154.462
912	ENSG00000117280	152.819	0.842055	0.481665	1.74822	0.0804267	0.489746	79.6031	107.673	159.547	268.532	148.741
913	ENSG00000121274	36.8202	1.35066	0.770859	1.75215	0.0797479	0.489746	12.3522	17.9455	37.1826	65.1334	51.4873
914	ENSG00000130414	77.912	1.11369	0.636259	1.75038	0.0800528	0.489746	49.4088	20.9364	88.5621	109.698	120.954
915	ENSG00000134086	143.173	1.06916	0.610171	1.75223	0.0797342	0.489746	35.6842	63.8061	197.406	222.825	196.142
916	ENSG00000134318	573.338	0.532824	0.303162	1.75755	0.0788233	0.489746	496.833	519.422	443.487	667.331	739.619
917	ENSG00000146677	252.703	-0.855845	0.488226	-1.75297	0.0796078	0.489746	446.052	350.934	127.097	170.261	169.172
918	ENSG00000162783	80.4455	-1.09797	0.624913	-1.757	0.0789184	0.489746	157.834	101.691	47.3233	59.4199	35.9594
919	ENSG00000166503	184.909	0.721885	0.409671	1.76211	0.0780508	0.489746	186.656	115.649	138.59	254.82	228.832
920	ENSG00000166913	4447.18	-0.493383	0.281187	-1.75465	0.07932	0.489746	5981.21	5015.76	4093.46	3791.45	3354.03
921	ENSG00000169621	115.552	-0.941103	0.534257	-1.76152	0.0781504	0.489746	199.008	140.573	89.2382	98.2714	50.67
922	ENSG00000170734	128.497	0.888473	0.507208	1.75169	0.0798267	0.489746	50.7813	97.7031	137.914	182.83	173.259
923	ENSG00000172086	79.1684	1.05896	0.605567	1.7487	0.0803428	0.489746	30.1943	47.8546	86.534	146.264	84.9949
924	ENSG00000174238	161.98	-0.803612	0.459654	-1.7483	0.0804127	0.489746	275.866	182.446	128.449	106.27	116.868
925	ENSG00000187147	151.644	-0.963318	0.547035	-1.76098	0.0782418	0.489746	204.498	287.128	73.6891	100.557	92.3502
926	ENSG00000196313	70.6063	0.9952	0.566779	1.75589	0.0791079	0.489746	49.4088	58.8213	43.267	127.981	73.5533
927	ENSG00000197170	91.9837	0.971852	0.554097	1.75394	0.0794414	0.489746	34.3117	70.7849	93.2945	123.411	138.117
928	ENSG00000198542	30.5487	1.89722	1.08374	1.75062	0.0800108	0.489746	13.7247	0	29.7461	59.4199	49.8528
929	ENSG00000206538	141.586	0.839888	0.480094	1.74943	0.0802175	0.489746	130.384	63.8061	128.449	225.11	160.183
930	ENSG00000220771	165.733	-1.00604	0.573348	-1.75467	0.0793161	0.489746	367.821	179.455	75.7173	87.9872	117.685
931	ENSG00000233668	162.162	-0.960647	0.548352	-1.75188	0.0797943	0.489746	315.668	209.364	79.7735	83.4164	122.589
932	ENSG00000240311	79.4873	-1.155	0.659198	-1.75213	0.0797521	0.489746	157.834	114.652	33.8023	44.5649	46.5837
933	ENSG00000224877	288.8	-0.626522	0.358625	-1.74701	0.0806357	0.490037	296.453	326.009	386.023	191.972	243.543
934	ENSG00000141376	140.62	-0.945607	0.541833	-1.7452	0.08095	0.49028	275.866	168.488	78.4214	99.4141	80.9086
935	ENSG00000141696	238.507	0.889571	0.509844	1.74479	0.0810216	0.49028	78.2306	145.558	308.277	284.53	375.939
936	ENSG00000155229	363.822	-0.687849	0.393894	-1.74628	0.0807624	0.49028	572.319	417.731	296.785	322.239	210.035
937	ENSG00000278311	531.914	-0.536529	0.307457	-1.74506	0.0809749	0.49028	639.57	636.067	546.922	402.227	434.781
938	ENSG00000148344	113.133	0.967413	0.554664	1.74414	0.0811346	0.49044	61.761	44.8637	137.914	169.118	152.01
939	ENSG00000099917	145.403	-0.766029	0.439614	-1.7425	0.0814204	0.491121	192.145	153.533	177.124	79.9883	124.223
940	ENSG00000143815	39.4769	-1.30056	0.746275	-1.74274	0.0813793	0.491121	65.8784	61.8122	27.7179	23.9965	17.9797
941	ENSG00000066084	57.896	-1.10698	0.635599	-1.74163	0.0815726	0.491462	107.052	64.8031	49.3514	38.8515	29.4213
942	ENSG00000140443	440.399	-0.732197	0.420702	-1.74042	0.0817857	0.491462	635.452	609.149	326.531	427.366	203.497
943	ENSG00000163171	128.738	0.771681	0.443444	1.7402	0.0818236	0.491462	116.66	84.7425	100.055	154.263	187.969
944	ENSG00000206503	64.4984	1.00384	0.576804	1.74034	0.0817993	0.491462	48.0364	53.8364	36.5065	75.4176	108.695
945	ENSG00000100503	117.9	0.94965	0.545913	1.73956	0.0819357	0.491614	35.6842	106.676	114.252	175.974	156.914
946	ENSG00000102921	29.7828	1.35366	0.778861	1.738	0.0822114	0.492747	20.587	14.9546	19.6054	42.2795	51.4873
947	ENSG00000231312	57.4756	1.11956	0.644486	1.73714	0.0823618	0.493127	21.9595	35.8909	58.8161	74.2749	96.4365
948	ENSG00000107521	180.574	0.85118	0.490189	1.73643	0.0824872	0.493357	64.506	140.573	203.49	237.68	256.619
949	ENSG00000049618	344.931	-0.597506	0.347719	-1.71836	0.0857316	0.493798	381.546	482.534	333.291	261.676	265.609
950	ENSG00000068654	69.8033	0.984039	0.567754	1.73321	0.0830579	0.493798	34.3117	61.8122	54.0838	86.8445	111.964
951	ENSG00000075624	1701.88	0.554137	0.322565	1.71791	0.0858139	0.493798	1170.71	1176.43	1951.75	1908.29	2302.22
952	ENSG00000085063	551.656	0.656544	0.380723	1.72447	0.0846234	0.493798	358.214	323.018	662.526	625.052	789.472
953	ENSG00000092439	93.4512	0.938339	0.54246	1.72978	0.0836687	0.493798	38.4291	84.7425	81.1256	154.263	108.695
954	ENSG00000100353	306.821	0.598135	0.34659	1.72577	0.0843881	0.493798	218.222	255.224	289.348	395.371	375.939
955	ENSG00000100418	114.324	-0.895142	0.520074	-1.72118	0.0852177	0.493798	214.105	116.646	90.5903	74.2749	76.005
956	ENSG00000100596	87.5353	0.896299	0.519465	1.72543	0.0844502	0.493798	46.6639	64.8031	83.1538	124.553	118.502
957	ENSG00000100664	453.322	-0.753796	0.437638	-1.72242	0.0849934	0.493798	796.031	577.246	252.165	297.1	344.066
958	ENSG00000103175	54.207	1.09297	0.632205	1.72883	0.0838402	0.493798	26.0769	46.8576	38.5347	98.2714	61.2944
959	ENSG00000107959	32.9643	-1.50878	0.87481	-1.7247	0.0845821	0.493798	74.1132	19.9394	39.8868	7.99883	22.8832
960	ENSG00000109919	418.578	-0.76709	0.443668	-1.72898	0.0838135	0.493798	683.489	596.188	225.124	262.819	325.269
961	ENSG00000112081	315.481	0.761399	0.442161	1.72199	0.0850706	0.493798	159.206	175.467	404.276	421.653	416.802
962	ENSG00000112977	202.906	0.706161	0.410179	1.72159	0.0851432	0.493798	126.267	160.512	198.082	313.097	216.573
963	ENSG00000115282	36.9154	-1.25499	0.730303	-1.71845	0.0857146	0.493798	60.3886	48.8516	35.1544	20.5684	19.6142
964	ENSG00000118263	45.5032	-1.19186	0.691851	-1.72272	0.0849398	0.493798	75.4857	59.8182	41.2389	18.283	32.6903
965	ENSG00000118482	255.215	0.70356	0.408376	1.72283	0.0849201	0.493798	133.129	231.297	246.081	388.515	277.051
966	ENSG00000118816	339.755	0.732565	0.425953	1.71982	0.0854643	0.493798	170.186	210.361	423.881	428.509	465.837
967	ENSG00000122707	53.6072	1.10591	0.641729	1.72333	0.0848294	0.493798	32.9392	23.9273	52.7317	85.7018	72.736
968	ENSG00000128923	134.71	0.918387	0.534911	1.7169	0.0859978	0.493798	41.174	131.6	124.393	162.262	214.122
969	ENSG00000131174	31.143	1.56514	0.91081	1.71841	0.085722	0.493798	20.587	3.98788	27.7179	33.138	70.2842
970	ENSG00000131378	165.498	-0.720134	0.419062	-1.71844	0.0857163	0.493798	149.599	217.34	221.743	121.125	117.685
971	ENSG00000131467	203.934	-0.842704	0.485908	-1.73429	0.0828671	0.493798	396.643	218.337	129.125	138.266	137.299
972	ENSG00000133142	372.143	0.753177	0.436466	1.72563	0.0844147	0.493798	135.874	350.934	388.051	445.649	540.208
973	ENSG00000133858	217.177	0.655825	0.379652	1.72744	0.084089	0.493798	171.558	163.503	194.025	316.525	240.274
974	ENSG00000136715	117.346	-1.04417	0.604659	-1.72688	0.0841891	0.493798	259.396	128.609	56.1119	61.7053	80.9086
975	ENSG00000147548	478.933	-0.696966	0.401636	-1.73532	0.0826845	0.493798	813.873	562.291	321.798	325.667	371.035
976	ENSG00000150779	53.6261	-1.06254	0.618654	-1.71751	0.0858863	0.493798	75.4857	66.797	60.8442	38.8515	26.1523
977	ENSG00000158270	57.3192	1.01761	0.587053	1.73342	0.0830205	0.493798	35.6842	44.8637	41.2389	87.9872	76.8223
978	ENSG00000166173	50.196	-1.11202	0.644879	-1.72439	0.0846372	0.493798	78.2306	57.8243	56.1119	22.8538	35.9594
979	ENSG00000168172	394.075	0.668491	0.385816	1.73267	0.0831546	0.493798	252.534	240.27	462.416	542.778	472.375
980	ENSG00000173418	154.823	-0.999895	0.580764	-1.72169	0.0851257	0.493798	284.101	238.276	58.8161	89.1299	103.792
981	ENSG00000179632	310.25	-0.654172	0.377713	-1.73193	0.0832859	0.493798	447.424	388.819	254.194	220.539	240.274
982	ENSG00000184990	80.7453	-1.09969	0.633952	-1.73466	0.082801	0.493798	171.558	87.7334	49.3514	35.4234	59.6599
983	ENSG00000185404	69.8192	0.954773	0.556186	1.71664	0.0860445	0.493798	50.7813	46.8576	54.7598	76.5603	120.137
984	ENSG00000189403	182.843	0.722087	0.417075	1.73131	0.083396	0.493798	149.599	119.636	166.308	188.544	290.127
985	ENSG00000196235	143.948	0.723266	0.420982	1.71805	0.0857883	0.493798	116.66	100.694	125.069	199.971	177.345
986	ENSG00000196683	165.278	-0.7792	0.450678	-1.72895	0.083818	0.493798	197.635	262.203	135.885	98.2714	132.396
987	ENSG00000239215	38.2044	-1.49007	0.866816	-1.71901	0.0856119	0.493798	74.1132	67.794	12.8449	12.5696	23.7005
988	ENSG00000273559	59.0464	0.994149	0.578787	1.71764	0.0858621	0.493798	41.174	40.8758	44.6191	92.5579	76.005
989	ENSG00000111845	78.7709	0.96179	0.560652	1.71549	0.0862562	0.494393	34.3117	57.8243	78.4214	109.698	113.599
990	ENSG00000153214	73.1563	1.01554	0.592108	1.71512	0.0863225	0.494393	49.4088	42.8697	63.5484	62.848	147.107
991	ENSG00000139433	57.3754	1.42645	0.832364	1.71374	0.0865766	0.494491	4.1174	27.9152	69.6328	110.841	74.3705
992	ENSG00000151746	79.641	-0.981528	0.572785	-1.71361	0.0866013	0.494491	113.915	69.7879	113.576	67.4187	33.5076
993	ENSG00000204560	46.4455	1.32493	0.772945	1.71414	0.0865038	0.494491	10.9797	18.9424	56.1119	74.2749	71.9187
994	ENSG00000067182	389.618	-0.632413	0.370272	-1.70797	0.0876424	0.495289	566.829	483.531	312.334	322.239	263.157
995	ENSG00000092841	5250.48	-0.516306	0.302412	-1.70729	0.0877676	0.495289	7536.22	6064.57	4306.42	4307.94	4037.26
996	ENSG00000092931	46.2009	1.44651	0.845825	1.71018	0.0872333	0.495289	8.23481	11.9636	60.8442	67.4187	82.5431
997	ENSG00000102265	1836.47	0.55196	0.323757	1.70486	0.0882212	0.495289	1313.45	1225.28	2103.86	2005.42	2534.32
998	ENSG00000102401	142.703	-0.764661	0.447907	-1.70719	0.0877871	0.495289	120.777	192.415	198.758	105.128	96.4365
999	ENSG00000108175	214.046	-0.681467	0.399837	-1.70436	0.0883135	0.495289	205.87	236.282	313.01	179.402	135.665
1000	ENSG00000111328	465.374	-0.739423	0.433579	-1.7054	0.0881207	0.495289	779.562	627.095	256.898	357.662	305.655
1001	ENSG00000117724	549.814	0.52321	0.306873	1.70497	0.0881997	0.495289	503.696	465.585	435.374	617.053	727.36
1002	ENSG00000122042	56.5932	-1.12673	0.659101	-1.70949	0.0873608	0.495289	82.3481	91.7213	42.591	43.4222	22.8832
1003	ENSG00000127947	109.743	-0.887079	0.518529	-1.71076	0.0871254	0.495289	172.931	138.579	92.6184	51.4211	93.1675
1004	ENSG00000133226	832.811	0.525461	0.307827	1.707	0.0878216	0.495289	735.643	738.755	650.357	1208.97	830.334
1005	ENSG00000136261	176.812	0.850686	0.49714	1.71116	0.0870516	0.495289	59.0161	161.509	179.828	214.826	268.878
1006	ENSG00000138758	3954.11	0.483439	0.283453	1.70554	0.0880944	0.495289	2786.11	3295.98	4149.58	4565.05	4973.83
1007	ENSG00000157741	76.8126	1.11871	0.656206	1.70482	0.0882286	0.495289	48.0364	18.9424	89.2382	131.409	96.4365
1008	ENSG00000166452	211.801	-0.790986	0.463257	-1.70745	0.0877391	0.495289	374.684	253.231	137.238	150.835	143.02
1009	ENSG00000205339	193.961	0.75736	0.442569	1.71128	0.087029	0.495289	96.0727	179.455	179.828	202.256	312.193
1010	ENSG00000214182	140.599	-0.889958	0.520988	-1.70821	0.0875969	0.495289	219.595	212.355	85.1819	113.126	72.736
1011	ENSG00000241839	157.689	-0.923024	0.539191	-1.71187	0.0869208	0.495289	297.825	208.367	77.7454	103.985	100.523
1012	ENSG00000113318	78.0449	0.943761	0.554374	1.70239	0.0886822	0.496019	54.8987	37.8849	77.7454	114.269	105.426
1013	ENSG00000121851	98.7197	0.94024	0.552187	1.70276	0.0886136	0.496019	104.308	36.8879	75.7173	156.549	120.137
1014	ENSG00000152377	110.827	0.797877	0.468844	1.7018	0.0887935	0.496019	97.4452	85.7395	73.6891	171.404	125.858
1015	ENSG00000226439	912.085	-0.727202	0.427251	-1.70205	0.0887464	0.496019	1614.02	1170.44	467.824	610.197	697.939
1016	ENSG00000102024	245.503	-0.739708	0.435516	-1.69846	0.0894203	0.49756	400.761	295.103	182.533	138.266	210.853
1017	ENSG00000103275	178.15	-0.762647	0.448976	-1.69863	0.0893881	0.49756	299.198	202.385	138.59	122.268	128.31
1018	ENSG00000151376	39.8797	-1.34574	0.792309	-1.6985	0.0894131	0.49756	93.3278	29.9091	35.1544	14.855	26.1523
1019	ENSG00000152439	49.9583	1.28428	0.755559	1.69978	0.0891726	0.49756	12.3522	23.9273	58.14	54.8491	100.523
1020	ENSG00000137207	202.413	-0.964447	0.568002	-1.69796	0.0895144	0.497595	468.011	198.397	88.5621	139.408	117.685
1021	ENSG00000115216	200.045	-0.806396	0.475681	-1.69525	0.0900289	0.499964	360.959	238.276	125.745	131.409	143.837
1022	ENSG00000108298	467.592	0.558456	0.329585	1.69442	0.0901851	0.500342	413.113	324.015	442.135	642.192	516.507
1023	ENSG00000126768	90.5357	-0.937161	0.553626	-1.69277	0.0904994	0.500664	93.3278	164.5	77.7454	69.7041	47.401
1024	ENSG00000155254	195.811	-0.720534	0.425517	-1.69331	0.0903959	0.500664	230.575	267.188	198.758	182.83	99.7055
1025	ENSG00000180189	148.907	-0.938703	0.554704	-1.69226	0.0905963	0.500664	282.728	198.397	71.661	110.841	80.9086
1026	ENSG00000198732	43.4144	-1.36081	0.803918	-1.69272	0.0905081	0.500664	69.9958	85.7395	16.9012	18.283	26.1523
1027	ENSG00000088325	345.376	0.559796	0.331011	1.69117	0.0908041	0.500969	293.708	311.055	266.362	442.221	413.533
1028	ENSG00000118596	89.3773	0.880214	0.520515	1.69104	0.0908282	0.500969	43.919	79.7577	76.3933	123.411	123.406
1029	ENSG00000067596	69.1848	-1.03116	0.610685	-1.68854	0.091308	0.501167	111.17	104.682	45.2951	42.2795	42.4974
1030	ENSG00000101457	86.0456	-0.938192	0.555924	-1.68763	0.0914828	0.501167	144.109	112.658	62.8724	52.5638	58.0253
1031	ENSG00000130522	425.452	-0.69139	0.409304	-1.68918	0.0911843	0.501167	699.958	502.473	303.545	379.373	241.908
1032	ENSG00000131381	58.6869	-1.14413	0.677195	-1.68952	0.0911196	0.501167	112.542	75.7698	37.1826	43.4222	24.5178
1033	ENSG00000138600	170.757	1.04294	0.61783	1.68806	0.0913996	0.501167	35.6842	77.7637	244.729	236.537	259.071
1034	ENSG00000175782	75.1601	0.991349	0.586854	1.68926	0.0911696	0.501167	52.1538	29.9091	79.0975	105.128	109.513
1035	ENSG00000239306	29.9672	1.51203	0.895696	1.6881	0.0913915	0.501167	23.3319	3.98788	24.3377	43.4222	54.7563
1036	ENSG00000120800	138.848	0.734704	0.43605	1.68491	0.0920066	0.503065	96.0727	135.588	97.3508	191.972	173.259
1037	ENSG00000143093	82.2197	-0.962758	0.571402	-1.68491	0.0920068	0.503065	133.129	116.646	56.7879	57.1345	47.401
1038	ENSG00000140092	112.099	0.89672	0.53312	1.68202	0.0925646	0.503236	93.3278	40.8758	115.604	155.406	155.279
1039	ENSG00000154380	1175.07	0.589025	0.349971	1.68307	0.0923617	0.503236	627.218	965.068	1339.25	1610.05	1333.77
1040	ENSG00000168056	57.125	-1.07635	0.639398	-1.68338	0.0923023	0.503236	89.2104	86.7364	41.2389	36.5661	31.8731
1041	ENSG00000197535	389.035	-0.620984	0.368778	-1.68389	0.0922021	0.503236	599.768	368.879	389.403	247.964	339.162
1042	ENSG00000261221	42.0994	-1.26275	0.750749	-1.68199	0.0925705	0.503236	91.9553	41.8728	31.0982	25.1392	20.4315
1043	ENSG00000290018	100.403	-0.919802	0.546853	-1.68199	0.0925704	0.503236	183.911	107.673	79.7735	79.9883	50.67
1044	ENSG00000024422	371.243	0.670954	0.399116	1.6811	0.0927433	0.503687	238.809	299.091	362.361	311.954	644
1045	ENSG00000138107	982.235	-0.568215	0.338121	-1.68051	0.0928582	0.503687	1416.39	1224.28	748.384	713.039	809.086
1046	ENSG00000150593	45.4788	-1.27461	0.758611	-1.68019	0.0929201	0.503687	46.6639	104.682	27.0419	22.8538	26.1523
1047	ENSG00000080200	48.3288	1.13128	0.673555	1.67957	0.0930405	0.503858	26.0769	49.8485	22.3095	78.8456	64.5634
1048	ENSG00000237450	71.8664	-1.18219	0.704166	-1.67885	0.0931822	0.504144	123.522	129.606	25.0137	35.4234	45.7665
1049	ENSG00000211584	96.2109	-0.886176	0.528241	-1.6776	0.0934257	0.50498	126.267	142.567	84.5059	81.131	46.5837
1050	ENSG00000009954	546.787	0.534963	0.319141	1.67626	0.0936876	0.505913	402.133	454.619	533.401	597.627	746.157
1051	ENSG00000196507	53.5474	1.25835	0.751002	1.67557	0.0938232	0.506163	24.7044	12.9606	64.9005	60.5626	104.609
1052	ENSG00000006576	148.593	-0.709818	0.423905	-1.67447	0.0940377	0.506507	192.145	146.555	189.293	100.557	114.416
1053	ENSG00000087086	3547.06	0.489586	0.292407	1.67433	0.0940656	0.506507	2467.7	3004.87	3687.16	3753.74	4821.82
1054	ENSG00000023608	64.4497	0.973685	0.584142	1.66686	0.0955413	0.50692	49.4088	31.9031	58.14	82.2737	100.523
1055	ENSG00000034510	2327.3	-0.659289	0.394469	-1.67133	0.0946557	0.50692	3777.03	3142.45	1264.21	1606.62	1846.19
1056	ENSG00000091986	5259.2	-0.620271	0.370941	-1.67216	0.0944932	0.50692	8061.87	7122.36	3157.82	4506.77	3447.2
1057	ENSG00000092010	162.651	0.722871	0.43305	1.66925	0.095067	0.50692	105.68	107.673	173.068	204.542	222.294
1058	ENSG00000100764	685.209	0.554544	0.332546	1.66757	0.0954005	0.50692	544.87	533.379	651.709	1056.99	639.096
1059	ENSG00000119392	40.7607	1.30021	0.77809	1.67103	0.0947167	0.50692	8.23481	26.9182	41.2389	62.848	64.5634
1060	ENSG00000149273	855.27	-0.508356	0.304493	-1.66951	0.0950157	0.50692	974.452	1146.52	790.975	701.612	662.797
1061	ENSG00000149600	47.0597	1.18109	0.70771	1.66889	0.0951394	0.50692	13.7247	38.8819	40.5628	57.1345	84.9949
1062	ENSG00000151657	62.8946	0.972066	0.582368	1.66916	0.0950854	0.50692	39.8016	39.8788	56.1119	105.128	73.5533
1063	ENSG00000155368	293.583	0.656546	0.392889	1.67107	0.0947078	0.50692	157.834	249.243	307.601	340.522	412.715
1064	ENSG00000164099	74.4688	0.965366	0.57896	1.66741	0.0954322	0.50692	69.9958	60.8152	31.7742	87.9872	121.771
1065	ENSG00000181191	99.0063	-0.886435	0.531848	-1.66671	0.0955727	0.50692	174.303	113.655	76.3933	62.848	67.8324
1066	ENSG00000183023	55.6067	-1.07239	0.641996	-1.67039	0.0948418	0.50692	94.7003	74.7728	41.9149	33.138	33.5076
1067	ENSG00000205726	150.417	0.787186	0.472274	1.6668	0.0955539	0.50692	65.8784	128.609	154.139	205.684	197.777
1068	ENSG00000243777	600.539	-0.826114	0.49476	-1.66973	0.0949734	0.50692	956.61	989.992	236.616	306.241	513.238
1069	ENSG00000244754	160.642	0.781898	0.467515	1.67246	0.0944344	0.50692	98.8177	87.7334	186.589	233.109	196.959
1070	ENSG00000169826	60.6607	-1.06056	0.636585	-1.66602	0.0957099	0.507173	46.6639	71.7819	110.872	44.5649	29.4213
1071	ENSG00000070010	93.7168	-0.822607	0.494427	-1.66376	0.0961611	0.507213	118.032	93.7152	128.449	66.276	62.1116
1072	ENSG00000091164	200.658	-0.861439	0.517655	-1.66412	0.096089	0.507213	403.505	173.473	158.195	83.4164	184.7
1073	ENSG00000102178	82.1101	-0.938829	0.563843	-1.66506	0.0959017	0.507213	146.854	90.7243	67.6047	45.7076	59.6599
1074	ENSG00000102780	63.8318	-0.996517	0.599445	-1.6624	0.0964326	0.507213	98.8177	88.7304	52.0556	35.4234	44.132
1075	ENSG00000114861	412.732	-0.548092	0.329516	-1.66333	0.0962473	0.507213	520.165	419.725	477.289	358.805	287.675
1076	ENSG00000123091	78.4845	-0.899933	0.541176	-1.66292	0.0963282	0.507213	111.17	106.676	71.661	45.7076	57.2081
1077	ENSG00000165138	33.8825	1.33017	0.800091	1.66252	0.0964089	0.507213	37.0566	11.9636	14.873	54.8491	50.67
1078	ENSG00000178188	80.3568	-0.972832	0.585198	-1.6624	0.0964331	0.507213	112.542	123.624	63.5484	68.5614	33.5076
1079	ENSG00000006831	105.628	0.817297	0.492344	1.66001	0.0969118	0.508787	108.425	62.8091	72.337	126.839	157.731
1080	ENSG00000118257	106.804	-0.795328	0.479089	-1.66008	0.0968976	0.508787	159.206	108.67	118.308	68.5614	79.2741
1081	ENSG00000110031	90.7713	-0.835003	0.503353	-1.65888	0.0971392	0.509509	91.9553	112.658	125.745	54.8491	68.6497
1082	ENSG00000112078	120.264	0.890347	0.537374	1.65685	0.0975504	0.511193	144.109	45.8606	79.7735	177.117	154.462
1083	ENSG00000124486	269.266	-0.664166	0.401047	-1.65608	0.0977053	0.511532	426.837	232.294	288.672	228.538	169.99
1084	ENSG00000136522	29.4608	1.40124	0.84704	1.65428	0.0980705	0.51297	12.3522	12.9606	27.7179	29.71	64.5634
1085	ENSG00000067334	214.934	-0.679612	0.41138	-1.65203	0.0985286	0.514417	347.234	209.364	202.814	159.977	155.279
1086	ENSG00000275023	58.4956	0.985633	0.596548	1.65223	0.0984882	0.514417	32.9392	39.8788	52.7317	92.5579	74.3705
1087	ENSG00000115504	153.839	0.676965	0.410342	1.64976	0.0989927	0.516365	134.502	122.627	115.604	183.973	212.487
1088	ENSG00000078668	118.261	-1.01323	0.614513	-1.64883	0.0991816	0.516875	273.121	104.682	67.6047	50.2784	95.6192
1089	ENSG00000130005	42.8697	1.60603	0.974557	1.64796	0.0993603	0.51733	0	41.8728	28.394	63.9907	80.0913
1090	ENSG00000112343	74.8901	1.12604	0.68532	1.64308	0.100366	0.517813	28.8218	21.9334	100.731	114.269	108.695
1091	ENSG00000127922	39.0429	1.3052	0.794313	1.64318	0.100346	0.517813	15.0971	11.9636	45.9712	61.7053	60.4771
1092	ENSG00000129534	32.2909	1.29844	0.790113	1.64336	0.100308	0.517813	10.9797	19.9394	29.7461	46.8503	53.9391
1093	ENSG00000133112	1091.88	-0.461098	0.280584	-1.64335	0.100311	0.517813	1161.11	1212.32	1304.77	825.022	956.192
1094	ENSG00000140545	190.821	-0.806309	0.489677	-1.64661	0.0996373	0.517813	314.295	270.179	106.815	139.408	123.406
1095	ENSG00000144283	146.244	0.758884	0.461208	1.64543	0.0998819	0.517813	164.696	94.7122	85.1819	201.114	185.518
1096	ENSG00000150316	571.595	-0.581019	0.353381	-1.64417	0.10014	0.517813	753.485	634.073	588.837	570.203	311.375
1097	ENSG00000171451	215.642	0.644933	0.392324	1.64388	0.100202	0.517813	160.579	143.564	223.095	273.103	277.868
1098	ENSG00000187098	32.8422	1.49919	0.911073	1.64552	0.0998619	0.517813	21.9595	2.99091	31.7742	50.2784	57.2081
1099	ENSG00000213315	40.0427	-1.31874	0.801166	-1.64603	0.0997585	0.517813	32.9392	93.7152	31.0982	28.5673	13.8934
1100	ENSG00000131981	96.7381	0.893352	0.544614	1.64034	0.100934	0.518386	49.4088	52.8394	112.9	133.695	134.848
1101	ENSG00000138279	44.4379	1.09966	0.670235	1.64071	0.100859	0.518386	20.587	31.9031	38.5347	67.4187	63.7462
1102	ENSG00000163349	49.6845	1.10412	0.672421	1.64201	0.100588	0.518386	17.8421	34.894	48.6754	74.2749	72.736
1103	ENSG00000176410	35.5559	1.6534	1.00716	1.64164	0.100664	0.518386	0	22.9303	33.8023	54.8491	66.1979
1104	ENSG00000229117	936.21	0.473789	0.288764	1.64075	0.100849	0.518386	813.873	740.749	875.481	1226.11	1024.84
1105	ENSG00000103657	87.3108	0.826925	0.504837	1.638	0.101421	0.518884	80.9756	55.8304	63.5484	117.697	118.502
1106	ENSG00000119042	31.0568	-1.39124	0.849376	-1.63796	0.10143	0.518884	21.9595	54.8334	46.6472	22.8538	8.98984
1107	ENSG00000145912	40.5705	1.20515	0.735888	1.63768	0.101489	0.518884	12.3522	33.897	33.1263	71.9895	51.4873
1108	ENSG00000150991	2275.73	-0.534718	0.326254	-1.63896	0.101221	0.518884	3459.99	2576.17	1757.72	1708.32	1876.43
1109	ENSG00000158710	590.894	-0.498569	0.304333	-1.63824	0.101372	0.518884	590.161	712.834	703.765	492.5	455.213
1110	ENSG00000054118	254.054	0.645896	0.394708	1.63639	0.101759	0.518994	174.303	174.47	271.771	375.945	273.782
1111	ENSG00000089280	697.365	-0.636559	0.388855	-1.63701	0.101629	0.518994	1107.58	896.277	437.402	534.779	510.786
1112	ENSG00000170035	96.013	-0.824918	0.504148	-1.63626	0.101785	0.518994	137.247	86.7364	125.069	58.2772	72.736
1113	ENSG00000116044	148.325	0.75294	0.460777	1.63407	0.102245	0.519922	91.9553	98.7001	157.519	236.537	156.914
1114	ENSG00000150977	38.0819	1.26871	0.77628	1.63435	0.102186	0.519922	41.174	18.9424	13.5209	74.2749	42.4974
1115	ENSG00000196655	84.3508	-0.838616	0.513572	-1.63291	0.102488	0.519922	113.915	109.667	83.8298	57.1345	57.2081
1116	ENSG00000225779	116.294	-1.0073	0.616927	-1.63277	0.102517	0.519922	185.283	208.367	43.267	79.9883	64.5634
1117	ENSG00000226360	102.733	0.823656	0.504341	1.63313	0.102441	0.519922	49.4088	97.7031	87.8861	140.551	138.117
1118	ENSG00000243304	551.457	-0.789257	0.483256	-1.63321	0.102426	0.519922	1022.49	743.74	224.448	364.518	402.091
1119	ENSG00000034713	69.4726	-0.935222	0.573401	-1.63101	0.102888	0.520191	96.0727	97.7031	64.2245	35.4234	53.9391
1120	ENSG00000077380	720.077	-0.554499	0.340436	-1.62879	0.103357	0.520191	1117.19	738.755	621.287	574.773	548.38
1121	ENSG00000083642	117	0.736233	0.451163	1.63186	0.10271	0.520191	107.052	88.7304	81.8017	155.406	152.01
1122	ENSG00000100138	163.486	-0.713103	0.437418	-1.63026	0.103048	0.520191	157.834	231.297	191.321	146.264	90.7157
1123	ENSG00000106031	54.0676	1.17811	0.722551	1.63049	0.102997	0.520191	15.0971	64.8031	27.7179	60.5626	102.157
1124	ENSG00000147027	147.463	0.728169	0.446756	1.6299	0.103122	0.520191	97.4452	94.7122	157.519	181.688	205.949
1125	ENSG00000148337	273.741	-0.593458	0.364396	-1.62861	0.103396	0.520191	326.647	334.982	287.32	245.678	174.076
1126	ENSG00000197747	380.502	-0.588982	0.361108	-1.63104	0.102882	0.520191	517.42	492.503	308.953	295.957	287.675
1127	ENSG00000266944	192.478	-0.657414	0.403643	-1.6287	0.103376	0.520191	170.186	246.252	259.602	141.694	144.655
1128	ENSG00000077514	41.7782	1.18571	0.728519	1.62756	0.103618	0.520844	43.919	22.9303	16.9012	49.1357	76.005
1129	ENSG00000183955	171.443	0.702831	0.432022	1.62684	0.103771	0.521151	126.267	106.676	177.8	187.401	259.071
1130	ENSG00000090316	120.697	-0.800037	0.49223	-1.62533	0.104092	0.521843	113.915	208.367	114.252	75.4176	91.5329
1131	ENSG00000101146	38.1692	-1.2687	0.780516	-1.62547	0.104063	0.521843	50.7813	38.8819	60.1682	9.14152	31.8731
1132	ENSG00000137944	75.9564	-0.898017	0.552667	-1.62488	0.104188	0.521861	68.6234	121.63	89.2382	53.7065	46.5837
1133	ENSG00000100243	543.41	0.489534	0.301806	1.62202	0.104799	0.523423	448.797	461.597	492.838	638.764	675.055
1134	ENSG00000107625	36.4508	1.16587	0.719039	1.62143	0.104926	0.523423	28.8218	17.9455	26.3658	50.2784	58.8426
1135	ENSG00000110955	78.4602	0.913358	0.563662	1.6204	0.105146	0.523423	80.9756	39.8788	53.4077	131.409	86.6294
1136	ENSG00000130363	41.862	1.26733	0.781856	1.62092	0.105034	0.523423	8.23481	34.894	36.5065	82.2737	47.401
1137	ENSG00000131171	174.898	-0.778297	0.479555	-1.62295	0.104599	0.523423	328.02	172.476	129.801	131.409	112.782
1138	ENSG00000164761	262.907	0.607703	0.375027	1.62043	0.10514	0.523423	163.324	260.209	227.828	342.807	320.365
1139	ENSG00000167770	274.012	-0.617921	0.381119	-1.62133	0.104946	0.523423	365.076	362.897	227.828	197.685	216.573
1140	ENSG00000066455	50.764	-1.06101	0.655038	-1.61977	0.105283	0.523513	61.761	70.7849	60.1682	19.4257	41.6802
1141	ENSG00000084764	60.0998	-1.03585	0.640814	-1.61646	0.105995	0.523513	105.68	80.7546	40.5628	39.9942	33.5076
1142	ENSG00000101782	153.569	0.797973	0.492898	1.61894	0.10546	0.523513	60.3886	121.63	172.392	203.399	210.035
1143	ENSG00000105372	1178.8	-0.461744	0.285153	-1.61928	0.105386	0.523513	1296.98	1511.41	1163.48	932.435	989.7
1144	ENSG00000132646	30.782	1.26689	0.783158	1.61766	0.105735	0.523513	17.8421	13.9576	27.0419	46.8503	48.2182
1145	ENSG00000136279	192.4	0.755275	0.467227	1.6165	0.105985	0.523513	163.324	78.7607	210.251	234.252	275.416
1146	ENSG00000146007	633.201	0.512629	0.31711	1.61657	0.105972	0.523513	542.125	441.658	638.188	833.021	711.015
1147	ENSG00000167703	45.0972	1.22738	0.758423	1.61833	0.105591	0.523513	49.4088	9.96971	29.07	76.5603	60.4771
1148	ENSG00000173473	499.134	0.510746	0.315929	1.61665	0.105954	0.523513	436.445	479.543	364.389	611.339	603.954
1149	ENSG00000153113	756.046	0.551064	0.341061	1.61574	0.106151	0.523826	448.797	618.122	843.707	980.428	889.177
1150	ENSG00000113456	113.784	0.83332	0.516218	1.61428	0.106467	0.524712	54.8987	82.7486	121.688	119.982	189.604
1151	ENSG00000181381	46.4987	1.16875	0.724109	1.61405	0.106516	0.524712	12.3522	47.8546	32.4503	60.5626	79.2741
1152	ENSG00000034152	114.109	0.839012	0.520724	1.61124	0.107127	0.525182	46.6639	115.649	97.3508	130.267	180.614
1153	ENSG00000075218	63.8317	1.15458	0.717223	1.60979	0.107445	0.525182	10.9797	42.8697	73.6891	84.5591	107.061
1154	ENSG00000132612	190.088	-0.62807	0.389986	-1.61049	0.10729	0.525182	248.417	193.412	222.419	138.266	147.924
1155	ENSG00000135899	87.5323	0.861337	0.534593	1.6112	0.107136	0.525182	46.6639	59.8182	90.5903	135.98	104.609
1156	ENSG00000141985	199.065	-0.726706	0.451209	-1.61058	0.107272	0.525182	203.125	173.473	331.939	180.545	106.244
1157	ENSG00000142546	129.576	-0.707856	0.439607	-1.6102	0.107354	0.525182	133.129	175.467	151.435	91.4152	96.4365
1158	ENSG00000168398	42.0938	1.36321	0.845746	1.61184	0.106996	0.525182	4.1174	25.9212	46.6472	65.1334	68.6497
1159	ENSG00000173320	85.3829	-0.952359	0.591039	-1.61133	0.107108	0.525182	155.089	110.664	52.0556	61.7053	47.401
1160	ENSG00000185222	361.833	0.571378	0.354788	1.61048	0.107294	0.525182	223.712	359.906	324.503	431.937	469.106
1161	ENSG00000114480	45.6502	-1.07549	0.668359	-1.60915	0.107584	0.525201	60.3886	55.8304	57.464	19.4257	35.1421
1162	ENSG00000123064	306.431	-0.656352	0.407945	-1.60892	0.107634	0.525201	429.582	435.676	212.279	210.255	244.36
1163	ENSG00000078140	169.825	0.669292	0.41645	1.60713	0.108025	0.52638	149.599	103.685	158.871	205.684	231.284
1164	ENSG00000105821	212.106	0.816884	0.50879	1.60554	0.108375	0.52638	60.3886	210.361	215.659	319.953	254.167
1165	ENSG00000117298	436.128	0.677972	0.422223	1.60572	0.108335	0.52638	204.498	294.106	555.034	505.069	621.934
1166	ENSG00000141526	305.589	0.65817	0.410024	1.6052	0.10845	0.52638	190.773	181.449	371.15	375.945	408.629
1167	ENSG00000183199	125.29	-0.916658	0.570644	-1.60636	0.108195	0.52638	222.34	181.449	59.4921	93.7006	69.467
1168	ENSG00000185900	142.465	0.826092	0.514745	1.60486	0.108525	0.52638	98.8177	55.8304	171.04	195.4	191.238
1169	ENSG00000236191	184.611	-0.814846	0.507485	-1.60566	0.10835	0.52638	315.668	258.215	95.9987	137.123	116.051
1170	ENSG00000120438	41.6329	-1.11091	0.693276	-1.6024	0.109066	0.528551	63.1335	37.8849	58.14	22.8538	26.1523
1171	ENSG00000042493	250.668	-0.692731	0.432638	-1.60118	0.109337	0.529412	418.603	271.176	198.758	141.694	223.112
1172	ENSG00000170962	33.3366	-1.43099	0.894354	-1.60002	0.109593	0.529945	69.9958	51.8425	12.1688	11.4269	21.2487
1173	ENSG00000218739	74.8266	0.915798	0.572431	1.59984	0.109634	0.529945	31.5668	61.8122	71.661	97.1287	111.964
1174	ENSG00000148719	159.173	-0.775602	0.485009	-1.59915	0.109787	0.530232	262.141	203.382	108.168	91.4152	130.761
1175	ENSG00000180964	192.393	-0.701744	0.439165	-1.5979	0.110064	0.531119	240.182	294.106	148.054	161.119	118.502
1176	ENSG00000013375	60.4479	-0.980429	0.614851	-1.59458	0.110806	0.533541	48.0364	81.7516	95.9987	33.138	43.3147
1177	ENSG00000060656	51.2035	-1.07702	0.676624	-1.59175	0.11144	0.533541	52.1538	99.6971	42.591	35.4234	26.1523
1178	ENSG00000105618	42.0192	1.34036	0.841235	1.59333	0.111087	0.533541	4.1174	38.8819	34.4784	81.131	51.4873
1179	ENSG00000111052	44.5459	-1.08972	0.684902	-1.59107	0.111595	0.533541	64.506	68.791	36.5065	25.1392	27.7868
1180	ENSG00000134333	131.539	0.722158	0.453495	1.59243	0.111289	0.533541	137.247	88.7304	87.8861	182.83	161
1181	ENSG00000177105	197.41	-0.64033	0.402195	-1.59209	0.111365	0.533541	249.789	268.185	173.744	147.407	147.924
1182	ENSG00000181852	113.533	0.809401	0.507539	1.59476	0.110767	0.533541	98.8177	49.8485	112.9	162.262	143.837
1183	ENSG00000188186	78.2579	-0.929522	0.584224	-1.59104	0.111601	0.533541	115.287	50.8455	123.717	49.1357	52.3045
1184	ENSG00000197102	1543.32	0.593752	0.373039	1.59166	0.11146	0.533541	835.833	1002.95	2005.83	1922.01	1949.98
1185	ENSG00000228253	3260.8	-0.522082	0.327891	-1.59224	0.11133	0.533541	3761.93	4836.3	2536.53	2978.99	2190.25
1186	ENSG00000235106	47.5482	-1.12784	0.708592	-1.59166	0.11146	0.533541	83.7205	63.8061	35.1544	18.283	36.7766
1187	ENSG00000089351	64.4666	-1.09642	0.689396	-1.5904	0.111744	0.533775	135.874	79.7577	30.4221	41.1369	35.1421
1188	ENSG00000177706	98.6691	-0.907136	0.570547	-1.58994	0.111849	0.533823	86.4655	121.63	156.167	34.2807	94.802
1189	ENSG00000166167	39.3273	-1.17722	0.740923	-1.58886	0.112093	0.534537	75.4857	29.9091	46.6472	21.7111	22.8832
1190	ENSG00000106948	34.141	-1.26589	0.797749	-1.58683	0.112552	0.536278	61.761	46.8576	25.0137	23.9965	13.0761
1191	ENSG00000268230	35.6016	1.18105	0.745267	1.58474	0.113026	0.538084	26.0769	30.9061	14.197	53.7065	53.1218
1192	ENSG00000105825	429.332	-0.733886	0.463376	-1.58378	0.113244	0.538667	296.453	336.976	897.79	347.378	268.061
1193	ENSG00000147400	97.357	0.791905	0.500426	1.58246	0.113544	0.539643	52.1538	86.7364	86.534	125.696	135.665
1194	ENSG00000124942	513.704	0.588114	0.372011	1.5809	0.1139	0.540883	262.141	504.467	515.148	578.201	708.563
1195	ENSG00000124145	67.3656	0.870294	0.550928	1.57969	0.114178	0.54175	52.1538	55.8304	43.943	98.2714	86.6294
1196	ENSG00000048828	396.347	-0.596606	0.377922	-1.57865	0.114417	0.541974	498.206	548.334	329.911	234.252	371.035
1197	ENSG00000075568	109.724	1.04132	0.659523	1.5789	0.114359	0.541974	21.9595	53.8364	154.139	163.405	155.279
1198	ENSG00000174891	499.841	-0.590946	0.374647	-1.57734	0.114717	0.542491	768.582	600.176	364.389	411.369	354.69
1199	ENSG00000224411	194.617	-0.717018	0.454561	-1.57739	0.114707	0.542491	325.275	233.291	134.533	133.695	146.289
1200	ENSG00000170017	434.985	-0.575041	0.364809	-1.57628	0.114961	0.542739	580.554	507.458	415.769	244.536	426.609
1201	ENSG00000198663	252.889	0.604466	0.383472	1.5763	0.114958	0.542739	157.834	203.382	265.686	318.811	318.731
1202	ENSG00000107897	51.2191	1.0753	0.682947	1.57451	0.115371	0.543684	49.4088	36.8879	20.9575	49.1357	99.7055
1203	ENSG00000129128	218.978	-0.610577	0.387701	-1.57487	0.115287	0.543684	230.575	314.046	217.687	157.691	174.893
1204	ENSG00000178695	160.184	-0.879896	0.55896	-1.57417	0.115449	0.543684	292.336	229.303	66.9286	102.842	109.513
1205	ENSG00000085117	130.488	0.831725	0.529654	1.57032	0.116341	0.546975	43.919	145.558	108.168	172.546	182.249
1206	ENSG00000114030	156.765	0.743582	0.473483	1.57045	0.11631	0.546975	78.2306	107.673	183.209	225.11	189.604
1207	ENSG00000204054	51.7777	1.09265	0.696263	1.56931	0.116577	0.547631	24.7044	19.9394	61.5203	79.9883	72.736
1208	ENSG00000067900	716.855	0.465974	0.297033	1.56876	0.116703	0.547771	561.339	650.025	654.413	788.456	930.04
1209	ENSG00000147202	63.9488	-0.967131	0.616769	-1.56806	0.116867	0.548085	100.19	92.7183	45.9712	34.2807	46.5837
1210	ENSG00000005156	51.4714	0.961314	0.61395	1.56579	0.117399	0.548158	34.3117	43.8667	33.8023	74.2749	71.1015
1211	ENSG00000119969	61.4234	0.898267	0.573267	1.56693	0.117132	0.548158	39.8016	53.8364	43.267	81.131	89.0812
1212	ENSG00000143416	59.5415	0.989026	0.631493	1.56617	0.117308	0.548158	30.1943	33.897	63.5484	66.276	103.792
1213	ENSG00000148303	113.198	0.811942	0.518022	1.56739	0.117024	0.548158	53.5262	127.612	79.0975	178.26	127.492
1214	ENSG00000157570	209.309	-0.772838	0.49383	-1.56499	0.117586	0.548158	399.388	235.285	118.984	141.694	151.193
1215	ENSG00000176343	161.169	-0.816948	0.521973	-1.56512	0.117556	0.548158	278.611	212.355	94.6466	78.8456	141.386
1216	ENSG00000204138	240.211	0.658174	0.420526	1.56512	0.117555	0.548158	190.773	132.597	261.63	249.107	366.949
1217	ENSG00000231074	63.9642	-0.930373	0.594606	-1.56469	0.117656	0.548158	59.0161	95.7092	81.8017	51.4211	31.8731
1218	ENSG00000260109	207.111	-0.748428	0.478477	-1.56419	0.117773	0.548256	389.781	217.34	135.209	131.409	161.817
1219	ENSG00000041982	77.2434	-0.851503	0.545468	-1.56105	0.118512	0.550105	119.405	68.791	93.9705	52.5638	51.4873
1220	ENSG00000090889	72.1912	0.994114	0.636463	1.56194	0.118303	0.550105	49.4088	21.9334	83.1538	110.841	95.6192
1221	ENSG00000187079	468.524	0.518713	0.332327	1.56085	0.118559	0.550105	325.275	397.791	473.909	625.052	520.594
1222	ENSG00000227057	35.697	1.29535	0.829556	1.5615	0.118405	0.550105	8.23481	18.9424	39.8868	41.1369	70.2842
1223	ENSG00000140948	38.8202	-1.11814	0.716611	-1.56032	0.118685	0.550241	67.2509	40.8758	40.5628	21.7111	23.7005
1224	ENSG00000047849	452.039	-0.512606	0.329122	-1.5575	0.119353	0.552578	478.991	616.128	445.515	342.807	376.756
1225	ENSG00000090857	191.856	0.793353	0.509529	1.55703	0.119463	0.552578	64.506	140.573	238.645	231.966	283.589
1226	ENSG00000101040	93.3217	0.784801	0.504063	1.55695	0.119482	0.552578	67.2509	56.8273	92.6184	131.409	118.502
1227	ENSG00000169446	80.6042	-0.819191	0.526289	-1.55654	0.119579	0.552578	118.032	80.7546	93.9705	51.4211	58.8426
1228	ENSG00000124151	85.3668	-0.94997	0.611091	-1.55455	0.120053	0.554319	160.579	109.667	47.3233	65.1334	44.132
1229	ENSG00000169679	33.0107	1.19265	0.76808	1.55277	0.120479	0.555377	19.2145	16.9485	29.07	37.7088	62.1116
1230	ENSG00000185561	35.2202	1.16704	0.751456	1.55304	0.120413	0.555377	34.3117	14.9546	21.6335	47.993	57.2081
1231	ENSG00000072518	95.0477	-0.850864	0.550532	-1.54553	0.122218	0.558756	101.563	174.47	70.9849	68.5614	59.6599
1232	ENSG00000073905	44.3791	-1.20029	0.779208	-1.5404	0.123463	0.558756	54.8987	94.7122	22.3095	31.9953	17.9797
1233	ENSG00000077549	237.58	0.661159	0.428	1.54476	0.122404	0.558756	116.66	193.412	267.039	276.531	334.259
1234	ENSG00000077942	301.254	0.574662	0.372629	1.54218	0.123029	0.558756	253.906	315.043	187.265	401.084	348.969
1235	ENSG00000087191	716.4	-0.466285	0.302732	-1.54025	0.123499	0.558756	920.926	791.595	704.441	543.921	621.116
1236	ENSG00000103888	97.5613	0.820124	0.531679	1.54252	0.122948	0.558756	41.174	88.7304	93.2945	142.836	121.771
1237	ENSG00000105877	33.7271	1.36843	0.88656	1.54353	0.122702	0.558756	9.60727	8.97274	42.591	67.4187	40.0457
1238	ENSG00000107362	44.231	-1.10931	0.718287	-1.54438	0.122496	0.558756	83.7205	39.8788	45.2951	34.2807	17.9797
1239	ENSG00000115241	684.706	0.470282	0.305303	1.54038	0.123467	0.558756	651.922	602.17	525.964	915.295	728.177
1240	ENSG00000119541	82.4715	0.886312	0.575264	1.5407	0.123389	0.558756	39.8016	48.8516	95.3226	95.986	132.396
1241	ENSG00000125378	540.847	-0.621239	0.40166	-1.54668	0.121941	0.558756	867.399	634.073	385.347	514.211	303.203
1242	ENSG00000134248	142.861	-0.729035	0.471836	-1.5451	0.122321	0.558756	150.971	191.418	166.308	139.408	66.1979
1243	ENSG00000140044	64.1813	0.888714	0.576464	1.54167	0.123155	0.558756	34.3117	56.8273	52.0556	95.986	81.7258
1244	ENSG00000142534	1462.87	-0.524362	0.339145	-1.54613	0.122073	0.558756	2228.89	1685.88	1084.38	1090.13	1225.07
1245	ENSG00000145901	118.986	-0.768615	0.497443	-1.54513	0.122314	0.558756	152.344	87.7334	187.265	89.1299	78.4568
1246	ENSG00000146674	56.2196	1.14706	0.741782	1.54636	0.122017	0.558756	35.6842	66.797	11.4928	67.4187	99.7055
1247	ENSG00000167772	45.6164	-1.12313	0.726705	-1.54551	0.122223	0.558756	34.3117	44.8637	95.3226	21.7111	31.8731
1248	ENSG00000168502	32.2495	1.59927	1.03659	1.54282	0.122874	0.558756	0	27.9152	25.0137	38.8515	69.467
1249	ENSG00000171867	133.419	0.658389	0.426614	1.54329	0.122761	0.558756	102.935	116.646	105.463	167.975	174.076
1250	ENSG00000175220	155.761	-0.704845	0.456342	-1.54456	0.122454	0.558756	244.299	189.424	119.66	108.556	116.868
1251	ENSG00000177189	138.138	-0.864686	0.559708	-1.54489	0.122373	0.558756	101.563	107.673	295.432	116.554	69.467
1252	ENSG00000185630	127.666	0.704563	0.454935	1.54871	0.121451	0.558756	109.797	75.7698	120.336	154.263	178.162
1253	ENSG00000221963	56.6543	1.08833	0.704632	1.54454	0.122458	0.558756	17.8421	72.7789	26.3658	84.5591	81.7258
1254	ENSG00000236238	89.5255	-1.07224	0.696292	-1.53993	0.123577	0.558756	150.971	151.54	37.1826	83.4164	24.5178
1255	ENSG00000088367	130.146	0.763783	0.496201	1.53926	0.12374	0.55905	57.6436	145.558	101.407	179.402	166.721
1256	ENSG00000120742	492.053	-0.634279	0.412269	-1.53851	0.123924	0.559435	827.598	594.194	300.165	382.801	355.507
1257	ENSG00000160993	38.0571	1.19325	0.775855	1.53799	0.124052	0.559567	38.4291	10.9667	26.3658	43.4222	71.1015
1258	ENSG00000136504	95.7618	0.764479	0.49735	1.53711	0.124267	0.560092	94.7003	62.8091	67.6047	113.126	140.568
1259	ENSG00000068323	239.32	-0.690429	0.449788	-1.53501	0.124781	0.56023	441.935	229.303	176.448	169.118	179.797
1260	ENSG00000105738	32.2846	-1.17694	0.766752	-1.53497	0.124792	0.56023	32.9392	51.8425	39.8868	17.1404	19.6142
1261	ENSG00000145375	74.5945	0.947506	0.617013	1.53563	0.124628	0.56023	21.9595	68.791	71.661	99.4141	111.147
1262	ENSG00000151914	1588.77	0.414533	0.270008	1.53526	0.12472	0.56023	1328.55	1347.9	1529.22	1885.44	1852.72
1263	ENSG00000167110	495.206	0.528989	0.344268	1.53656	0.124401	0.56023	325.275	385.828	549.626	605.626	609.675
1264	ENSG00000124155	240.411	0.73953	0.482526	1.53262	0.125369	0.562375	111.17	134.591	321.798	270.818	363.68
1265	ENSG00000103415	71.5999	0.878248	0.573643	1.531	0.125769	0.56311	39.8016	77.7637	43.267	92.5579	104.609
1266	ENSG00000107937	308.756	0.558819	0.365072	1.53071	0.125842	0.56311	219.595	273.17	285.968	307.384	457.665
1267	ENSG00000134982	255.043	-0.716842	0.468128	-1.5313	0.125696	0.56311	404.878	365.888	137.238	175.974	191.238
1268	ENSG00000184640	275.936	-0.568542	0.371511	-1.53035	0.12593	0.56311	321.157	331.991	298.137	261.676	166.721
1269	ENSG00000189171	639.19	0.649102	0.424388	1.5295	0.12614	0.563606	277.238	444.649	838.974	699.327	935.761
1270	ENSG00000082701	330.568	-0.639396	0.418541	-1.52768	0.126592	0.56507	536.635	406.764	214.983	241.108	253.35
1271	ENSG00000138592	192.539	0.77552	0.50788	1.52698	0.126767	0.56507	69.9958	130.603	247.433	289.101	225.563
1272	ENSG00000168014	29.5757	-1.28259	0.839854	-1.52716	0.126721	0.56507	31.5668	40.8758	43.267	23.9965	8.17258
1273	ENSG00000141027	255.406	0.57812	0.378748	1.5264	0.126911	0.565268	214.105	174.47	250.813	367.946	269.695
1274	ENSG00000182512	112.495	0.800729	0.525022	1.52513	0.127226	0.565821	80.9756	48.8516	129.801	150.835	152.01
1275	ENSG00000189306	51.6189	1.33129	0.872922	1.5251	0.127235	0.565821	4.1174	18.9424	72.337	77.7029	84.9949
1276	ENSG00000055332	102.314	0.780884	0.513281	1.52136	0.12817	0.566505	48.0364	91.7213	98.0268	123.411	150.376
1277	ENSG00000117228	105.516	0.850872	0.558676	1.52301	0.127755	0.566505	41.174	66.797	130.477	137.123	152.01
1278	ENSG00000132424	824.53	-0.591527	0.38868	-1.52189	0.128037	0.566505	1165.22	1188.39	505.007	716.467	547.563
1279	ENSG00000145592	2284.63	-0.581537	0.381725	-1.52345	0.127647	0.566505	3494.3	3038.77	1371.02	1426.08	2093
1280	ENSG00000158290	61.0012	0.946569	0.622542	1.52049	0.128388	0.566505	49.4088	25.9212	58.14	68.5614	102.975
1281	ENSG00000161904	31.4137	1.56312	1.02785	1.52077	0.128316	0.566505	4.1174	3.98788	43.943	61.7053	43.3147
1282	ENSG00000165280	463.63	-0.489627	0.321928	-1.52092	0.12828	0.566505	579.181	534.376	459.036	339.379	406.177
1283	ENSG00000169641	364.057	-0.52226	0.34348	-1.5205	0.128386	0.566505	477.619	336.976	428.614	307.384	269.695
1284	ENSG00000183779	75.3492	-0.914632	0.601027	-1.52178	0.128064	0.566505	148.226	67.794	62.8724	42.2795	55.5736
1285	ENSG00000198113	115.504	-0.693903	0.456048	-1.52156	0.12812	0.566505	150.971	133.594	124.393	92.5579	76.005
1286	ENSG00000007866	71.4637	1.17985	0.776415	1.51961	0.128608	0.567037	15.0971	17.9455	108.168	107.413	108.695
1287	ENSG00000100201	530.362	-0.602832	0.397238	-1.51756	0.129125	0.567488	839.95	669.964	333.967	391.943	415.984
1288	ENSG00000110237	104.12	-0.771534	0.508235	-1.51807	0.128998	0.567488	141.364	148.549	84.5059	85.7018	60.4771
1289	ENSG00000118985	75.6463	0.940076	0.619604	1.51722	0.129211	0.567488	21.9595	70.7849	72.337	119.982	93.1675
1290	ENSG00000129515	145.434	-0.783124	0.516083	-1.51744	0.129156	0.567488	222.34	220.331	81.8017	111.984	90.7157
1291	ENSG00000149639	72.3601	0.856483	0.56431	1.51775	0.129077	0.567488	34.3117	64.8031	64.2245	102.842	95.6192
1292	ENSG00000173264	101.73	-0.793878	0.523595	-1.5162	0.129468	0.568174	138.619	155.527	73.6891	63.9907	76.8223
1293	ENSG00000102189	301.01	0.523572	0.345421	1.51575	0.129583	0.568241	252.534	226.312	289.348	369.089	367.766
1294	ENSG00000096401	153.447	0.626947	0.413992	1.51439	0.129926	0.569306	144.109	112.658	121.688	182.83	205.949
1295	ENSG00000065457	72.5692	1.01456	0.671264	1.51142	0.130682	0.570574	15.0971	62.8091	75.7173	123.411	85.8121
1296	ENSG00000100528	56.2434	-0.920814	0.608733	-1.51267	0.130363	0.570574	89.2104	58.8213	60.1682	35.4234	37.5939
1297	ENSG00000113140	1584.09	-0.526529	0.348731	-1.50984	0.131083	0.570574	2259.08	2069.71	1086.41	1381.51	1123.73
1298	ENSG00000125447	35.805	-1.12937	0.747983	-1.50989	0.131071	0.570574	50.7813	46.8576	39.8868	13.7123	27.7868
1299	ENSG00000129038	295.496	-0.794635	0.525824	-1.51122	0.130733	0.570574	566.829	385.828	115.604	177.117	232.101
1300	ENSG00000129562	103.181	0.859192	0.568962	1.5101	0.131017	0.570574	50.7813	47.8546	133.857	137.123	146.289
1301	ENSG00000144320	70.155	0.923653	0.612288	1.50853	0.13142	0.570574	26.0769	55.8304	72.337	78.8456	117.685
1302	ENSG00000144840	43.8667	-1.00168	0.664225	-1.50804	0.131544	0.570574	63.1335	54.8334	46.6472	28.5673	26.1523
1303	ENSG00000163956	117.294	0.813232	0.53808	1.51136	0.130697	0.570574	50.7813	78.7607	139.266	194.257	123.406
1304	ENSG00000175334	106.858	-0.81508	0.540743	-1.50733	0.131725	0.570574	185.283	67.794	134.533	78.8456	67.8324
1305	ENSG00000176142	105.321	-0.844106	0.559522	-1.50862	0.131396	0.570574	194.89	121.63	68.2807	55.9918	85.8121
1306	ENSG00000182180	68.3762	0.980382	0.650038	1.50819	0.131506	0.570574	38.4291	23.9273	84.5059	110.841	84.1776
1307	ENSG00000187173	54.8028	-1.10768	0.734685	-1.5077	0.131632	0.570574	69.9958	106.676	33.1263	15.9977	48.2182
1308	ENSG00000198265	103.759	0.71481	0.47403	1.50794	0.131569	0.570574	78.2306	73.7758	95.3226	149.692	121.771
1309	ENSG00000198301	225.956	0.65613	0.435217	1.50759	0.131659	0.570574	124.895	149.546	275.151	303.956	276.233
1310	ENSG00000118705	491.493	0.489897	0.325206	1.50642	0.131959	0.570714	362.331	436.673	469.853	517.639	670.969
1311	ENSG00000133704	127.158	-0.747557	0.496155	-1.5067	0.131888	0.570714	146.854	209.364	99.3789	73.1322	107.061
1312	ENSG00000132153	93.5817	-0.856247	0.56866	-1.50573	0.132137	0.571049	116.66	167.491	58.14	59.4199	66.1979
1313	ENSG00000105193	495.79	-0.468793	0.31143	-1.50529	0.132249	0.571097	506.441	618.122	548.274	405.655	400.457
1314	ENSG00000100417	80.2148	-0.8688	0.577869	-1.50345	0.132722	0.571479	72.7408	151.54	69.6328	49.1357	58.0253
1315	ENSG00000104356	118.096	0.743226	0.494416	1.50324	0.132777	0.571479	89.2104	66.797	122.364	191.972	120.137
1316	ENSG00000186432	372.602	-0.519944	0.345933	-1.50302	0.132834	0.571479	426.837	336.976	507.711	289.101	302.386
1317	ENSG00000227462	36.5369	-1.21312	0.80714	-1.50299	0.132841	0.571479	30.1943	81.7516	29.7461	26.2819	14.7107
1318	ENSG00000244422	56.9975	-1.08738	0.723085	-1.5038	0.132632	0.571479	113.915	76.7667	26.3658	43.4222	24.5178
1319	ENSG00000149257	125.207	0.743949	0.495128	1.50254	0.132958	0.571549	68.6234	148.549	78.4214	170.261	160.183
1320	ENSG00000197006	170.475	-0.631557	0.420626	-1.50147	0.133234	0.572299	237.437	208.367	150.758	117.697	138.117
1321	ENSG00000136045	454.709	-0.524941	0.349885	-1.50032	0.13353	0.57314	502.323	664.979	386.699	359.947	359.594
1322	ENSG00000149532	162.126	-0.694032	0.462846	-1.49949	0.133747	0.57343	252.534	203.382	118.984	101.699	134.03
1323	ENSG00000160410	32.6932	1.24246	0.828705	1.49928	0.1338	0.57343	6.86234	26.9182	29.07	54.8491	45.7665
1324	ENSG00000222041	288.705	-0.538993	0.35965	-1.49866	0.133962	0.57369	369.194	282.143	338.699	197.685	255.802
1325	ENSG00000081189	133.994	-0.730853	0.488182	-1.49709	0.13437	0.574568	181.166	203.382	93.9705	86.8445	104.609
1326	ENSG00000131504	272.205	-0.547219	0.365464	-1.49733	0.134308	0.574568	378.801	296.1	260.278	212.54	213.304
1327	ENSG00000029363	216.297	0.597249	0.399606	1.49459	0.13502	0.57519	218.222	128.609	191.997	258.248	284.406
1328	ENSG00000178104	38.851	1.09935	0.735207	1.4953	0.134837	0.57519	34.3117	31.9031	14.197	63.9907	49.8528
1329	ENSG00000179335	41.1	-1.12128	0.750018	-1.49501	0.134913	0.57519	28.8218	85.7395	42.591	26.2819	22.066
1330	ENSG00000185787	71.343	0.827891	0.553671	1.49528	0.134842	0.57519	60.3886	40.8758	62.1963	84.5591	108.695
1331	ENSG00000214832	29.5051	1.66214	1.11211	1.49459	0.135023	0.57519	1.37247	3.98788	41.2389	67.4187	33.5076
1332	ENSG00000162236	146.469	-0.640593	0.429049	-1.49305	0.135423	0.576156	183.911	137.582	191.321	116.554	102.975
1333	ENSG00000170525	70.0172	-0.948357	0.635228	-1.49294	0.135453	0.576156	111.17	109.667	39.8868	35.4234	53.9391
1334	ENSG00000169895	327.502	0.67915	0.455356	1.49147	0.135838	0.577363	130.384	238.276	421.853	388.515	458.482
1335	ENSG00000100075	276.558	-0.525562	0.352492	-1.49099	0.135964	0.577465	293.708	357.912	293.404	222.825	214.939
1336	ENSG00000018189	70.2642	0.990919	0.666418	1.48693	0.137032	0.577633	37.0566	21.9334	91.2663	111.984	89.0812
1337	ENSG00000075945	98.3684	-0.869028	0.584237	-1.48746	0.136894	0.577633	188.028	111.661	60.8442	82.2737	49.0355
1338	ENSG00000087460	149.907	0.721231	0.484582	1.48836	0.136657	0.577633	61.761	156.524	137.914	198.828	194.507
1339	ENSG00000114251	92.7219	-0.907319	0.610338	-1.48659	0.137124	0.577633	64.506	75.7698	201.462	49.1357	72.736
1340	ENSG00000117305	39.1993	1.10789	0.744385	1.48834	0.136663	0.577633	30.1943	12.9606	37.1826	50.2784	65.3807
1341	ENSG00000143633	55.7789	0.899899	0.60512	1.48714	0.136977	0.577633	49.4088	44.8637	30.4221	76.5603	77.6395
1342	ENSG00000152818	200.489	0.647048	0.434633	1.48872	0.13656	0.577633	108.425	147.552	233.236	258.248	254.985
1343	ENSG00000170027	661.548	-0.503012	0.33757	-1.4901	0.136199	0.577633	861.91	859.389	528.669	574.773	483
1344	ENSG00000177707	288.227	-0.525817	0.35351	-1.48742	0.136904	0.577633	286.846	380.843	317.066	236.537	219.842
1345	ENSG00000214748	169.736	-0.625762	0.420505	-1.48812	0.136719	0.577633	152.344	201.388	238.645	116.554	139.751
1346	ENSG00000236830	39.6605	-1.21556	0.816035	-1.48959	0.136332	0.577633	87.8379	41.8728	24.3377	31.9953	12.2589
1347	ENSG00000103994	418.648	0.493196	0.332251	1.48441	0.1377	0.577892	293.708	376.855	408.332	537.065	477.279
1348	ENSG00000118473	116.586	-0.775307	0.522428	-1.48404	0.137797	0.577892	75.4857	158.518	185.237	69.7041	93.9847
1349	ENSG00000129250	722.057	0.535136	0.360524	1.48433	0.137722	0.577892	369.194	690.901	774.75	865.017	910.426
1350	ENSG00000143549	988.205	0.471944	0.317893	1.4846	0.137649	0.577892	907.201	673.952	986.352	984.999	1388.52
1351	ENSG00000165416	234.027	-0.612499	0.412517	-1.48479	0.1376	0.577892	277.238	356.915	181.181	166.833	187.969
1352	ENSG00000242086	41.079	-1.10681	0.744974	-1.48571	0.137357	0.577892	63.1335	50.8455	42.591	36.5661	12.2589
1353	ENSG00000126934	184.567	-0.645861	0.435573	-1.48278	0.138132	0.578015	168.814	193.412	283.94	167.975	108.695
1354	ENSG00000173905	372.719	0.507182	0.3419	1.48342	0.137963	0.578015	304.688	266.191	385.347	468.503	438.868
1355	ENSG00000204842	287.153	0.61433	0.414309	1.48278	0.138132	0.578015	141.364	264.197	303.545	419.367	307.289
1356	ENSG00000137962	284.423	0.57456	0.388053	1.48062	0.138707	0.578053	258.024	296.1	160.223	364.518	343.249
1357	ENSG00000172590	116.952	-0.76901	0.519443	-1.48045	0.138753	0.578053	98.8177	109.667	211.603	67.4187	97.2537
1358	ENSG00000185298	82.1014	1.03719	0.699717	1.4823	0.138261	0.578053	10.9797	70.7849	90.5903	124.553	113.599
1359	ENSG00000189337	69.7611	0.807522	0.544969	1.48178	0.1384	0.578053	52.1538	60.8152	47.9993	102.842	84.9949
1360	ENSG00000198833	124.11	-0.753808	0.508848	-1.4814	0.1385	0.578053	193.518	170.482	81.1256	93.7006	81.7258
1361	ENSG00000232472	48.5201	-0.988405	0.667331	-1.48113	0.138572	0.578053	76.8582	67.794	37.1826	29.71	31.0558
1362	ENSG00000112992	45.3805	-1.07242	0.724774	-1.47966	0.138964	0.578507	48.0364	65.8001	58.8161	12.5696	41.6802
1363	ENSG00000130313	45.8912	-1.01207	0.684235	-1.47913	0.139106	0.578673	59.0161	77.7637	35.8305	27.4246	29.4213
1364	ENSG00000068745	66.3392	-1.07819	0.730567	-1.47583	0.139989	0.578741	148.226	79.7577	24.3377	49.1357	30.2386
1365	ENSG00000079462	251.491	-0.696608	0.471169	-1.47847	0.139283	0.578741	411.74	338.97	141.294	149.692	215.756
1366	ENSG00000103642	77.1581	0.788141	0.53348	1.47736	0.13958	0.578741	50.7813	53.8364	74.3652	94.8433	111.964
1367	ENSG00000136877	32.0204	1.2488	0.845079	1.47773	0.13948	0.578741	6.86234	19.9394	34.4784	51.4211	47.401
1368	ENSG00000142156	1391.11	0.41867	0.283722	1.47564	0.140041	0.578741	1081.5	1224.28	1371.7	1492.35	1785.71
1369	ENSG00000143878	64.6576	-0.838003	0.567737	-1.47604	0.139933	0.578741	82.3481	83.7455	69.6328	37.7088	49.8528
1370	ENSG00000157823	46.8177	1.2461	0.844259	1.47597	0.139953	0.578741	23.3319	5.98182	60.8442	54.8491	89.0812
1371	ENSG00000185728	234.972	-0.607068	0.411069	-1.4768	0.139729	0.578741	380.174	226.312	211.603	162.262	194.507
1372	ENSG00000188986	47.8978	-1.09035	0.738345	-1.47675	0.139742	0.578741	86.4655	66.797	29.07	39.9942	17.1624
1373	ENSG00000115073	36.3733	-1.20819	0.818987	-1.47522	0.140153	0.578782	71.3683	39.8788	30.4221	9.14152	31.0558
1374	ENSG00000198000	116.986	0.696784	0.472462	1.4748	0.140267	0.578833	69.9958	94.7122	115.604	171.404	133.213
1375	ENSG00000167779	224.469	0.66483	0.4515	1.47249	0.140888	0.580548	107.052	161.509	275.827	261.676	316.279
1376	ENSG00000198792	74.3832	-0.797097	0.541195	-1.47285	0.140792	0.580548	104.308	93.7152	70.9849	51.4211	51.4873
1377	ENSG00000117155	76.0378	-0.876871	0.595886	-1.47154	0.141145	0.580877	142.737	81.7516	54.7598	55.9918	44.9492
1378	ENSG00000176771	76.7214	0.790845	0.537464	1.47144	0.141173	0.580877	64.506	45.8606	67.6047	116.554	89.0812
1379	ENSG00000114354	72.1501	-0.837738	0.56951	-1.47098	0.141297	0.580897	64.506	79.7577	118.308	43.4222	54.7563
1380	ENSG00000167778	99.0794	-0.799872	0.543885	-1.47066	0.141382	0.580897	131.757	134.591	92.6184	39.9942	96.4365
1381	ENSG00000103876	69.691	-0.831655	0.565668	-1.47022	0.141503	0.580971	108.425	62.8091	82.4777	45.7076	49.0355
1382	ENSG00000011426	132.79	0.716382	0.48842	1.46673	0.142448	0.581544	144.109	111.661	62.1963	158.834	187.152
1383	ENSG00000049323	371.191	-0.54519	0.371285	-1.46839	0.141999	0.581544	509.185	332.988	432.67	223.967	357.142
1384	ENSG00000106366	755.029	-0.576026	0.392185	-1.46876	0.141898	0.581544	1298.35	798.573	513.12	498.213	666.883
1385	ENSG00000115661	31.3377	-1.24004	0.845476	-1.46668	0.142463	0.581544	69.9958	19.9394	32.4503	17.1404	17.1624
1386	ENSG00000135090	662.598	-0.460764	0.314066	-1.46709	0.142351	0.581544	889.359	697.879	644.949	589.628	491.172
1387	ENSG00000137288	50.887	0.956905	0.652363	1.46683	0.142423	0.581544	27.4494	35.8909	47.3233	51.4211	92.3502
1388	ENSG00000198954	100.271	-0.726755	0.495287	-1.46734	0.142284	0.581544	98.8177	104.682	153.463	76.5603	67.8324
1389	ENSG00000228844	67.2792	-0.998884	0.680638	-1.46757	0.142221	0.581544	133.129	89.7274	29.7461	44.5649	39.2284
1390	ENSG00000099991	114.4	1.04519	0.713719	1.46442	0.143078	0.583431	10.9797	107.673	121.012	222.825	109.513
1391	ENSG00000150938	228.363	0.578112	0.394823	1.46423	0.143131	0.583431	209.988	141.57	220.391	322.239	247.629
1392	ENSG00000110880	329.487	-0.516388	0.353076	-1.46254	0.143592	0.583878	330.765	463.591	329.235	269.675	254.167
1393	ENSG00000162493	220.325	-0.710657	0.485886	-1.4626	0.143577	0.583878	432.327	213.352	137.914	161.119	156.914
1394	ENSG00000184897	135.695	0.720232	0.492433	1.4626	0.143578	0.583878	68.6234	164.5	89.9142	180.545	174.893
1395	ENSG00000255717	55.5079	-0.905657	0.619328	-1.46232	0.143653	0.583878	46.6639	78.7607	79.0975	35.4234	37.5939
1396	ENSG00000075426	90.0148	-0.815352	0.558177	-1.46074	0.144086	0.584694	108.425	151.54	66.9286	47.993	75.1878
1397	ENSG00000125166	234.17	-0.561071	0.384173	-1.46046	0.144163	0.584694	325.275	267.188	214.307	196.543	167.538
1398	ENSG00000169689	63.8314	-0.917457	0.62791	-1.46113	0.14398	0.584694	56.2712	123.624	56.1119	36.5661	46.5837
1399	ENSG00000028528	49.1858	0.999788	0.68524	1.45903	0.144556	0.585452	26.0769	21.9334	56.7879	70.8468	70.2842
1400	ENSG00000163814	64.1788	-0.844112	0.578426	-1.45933	0.144475	0.585452	59.0161	84.7425	89.9142	47.993	39.2284
1401	ENSG00000101347	63.9501	0.820219	0.562634	1.45782	0.14489	0.585773	52.1538	50.8455	43.943	95.986	76.8223
1402	ENSG00000165891	79.9503	-0.885084	0.607211	-1.45762	0.144945	0.585773	94.7003	64.8031	134.533	29.71	76.005
1403	ENSG00000185716	213.054	-0.723543	0.496279	-1.45794	0.144858	0.585773	160.579	159.515	438.078	148.55	158.548
1404	ENSG00000108424	1057.79	-0.483488	0.331793	-1.4572	0.145062	0.585828	1425.99	1343.92	812.608	769.031	937.395
1405	ENSG00000101868	45.0579	1.19339	0.81934	1.45652	0.145248	0.586161	8.23481	23.9273	56.1119	93.7006	43.3147
1406	ENSG00000145425	73.2215	0.811132	0.55731	1.45544	0.145547	0.586534	74.1132	38.8819	56.1119	94.8433	102.157
1407	ENSG00000232119	349.316	-0.499938	0.343468	-1.45556	0.145514	0.586534	463.894	385.828	338.023	260.533	298.299
1408	ENSG00000235962	79.3067	-1.06731	0.733861	-1.45437	0.145844	0.587311	181.166	92.7183	27.7179	26.2819	68.6497
1409	ENSG00000173918	40.0784	0.99942	0.687361	1.45399	0.145948	0.587313	28.8218	23.9273	33.1263	49.1357	65.3807
1410	ENSG00000166037	45.8471	0.95312	0.656597	1.45161	0.146611	0.589564	43.919	30.9061	25.6898	61.7053	67.0152
1411	ENSG00000169100	454.555	-0.49008	0.337847	-1.4506	0.146892	0.590275	410.368	497.488	632.78	349.663	382.477
1412	ENSG00000127022	3829.93	-0.406521	0.280481	-1.44937	0.147234	0.591228	4880.49	4494.34	3367.39	3191.53	3215.91
1413	ENSG00000104825	42.7046	-0.983915	0.679901	-1.44714	0.147856	0.591575	61.761	39.8788	58.14	25.1392	28.604
1414	ENSG00000119977	33.1234	1.24351	0.860581	1.44497	0.148468	0.591575	5.48987	24.9243	33.1263	62.848	39.2284
1415	ENSG00000139645	141.414	-0.648584	0.448749	-1.44532	0.148369	0.591575	203.125	160.512	133.181	86.8445	123.406
1416	ENSG00000156535	113.953	-0.679148	0.469189	-1.44749	0.147759	0.591575	146.854	102.688	152.787	79.9883	87.4466
1417	ENSG00000164904	61.8818	0.86436	0.598088	1.44521	0.1484	0.591575	43.919	31.9031	63.5484	89.1299	80.9086
1418	ENSG00000170310	37.9212	1.0042	0.69406	1.44685	0.14794	0.591575	28.8218	23.9273	28.394	53.7065	54.7563
1419	ENSG00000170921	59.3771	-1.03861	0.717883	-1.44677	0.147961	0.591575	115.287	84.7425	24.3377	42.2795	30.2386
1420	ENSG00000173020	42.7458	-1.24626	0.861982	-1.44581	0.148231	0.591575	85.093	71.7819	10.1407	26.2819	20.4315
1421	ENSG00000179271	190.703	0.829297	0.573616	1.44574	0.148251	0.591575	54.8987	123.624	256.898	163.405	354.69
1422	ENSG00000180992	35.052	-1.23386	0.853121	-1.44629	0.148095	0.591575	15.0971	53.8364	67.6047	12.5696	26.1523
1423	ENSG00000205302	140.325	-0.716213	0.495429	-1.44564	0.148277	0.591575	237.437	167.491	94.6466	109.698	92.3502
1424	ENSG00000116273	51.7061	-1.05331	0.729394	-1.44409	0.148715	0.592144	113.915	45.8606	36.5065	20.5684	41.6802
1425	ENSG00000104880	32.8374	1.28645	0.891548	1.44294	0.149037	0.592689	12.3522	6.97879	42.591	43.4222	58.8426
1426	ENSG00000119616	637.611	-0.596251	0.413774	-1.441	0.149583	0.592689	999.156	865.371	348.84	486.786	487.903
1427	ENSG00000131435	134.87	-0.622815	0.432018	-1.44164	0.149403	0.592689	156.461	137.582	176.448	101.699	102.157
1428	ENSG00000145715	103.187	-0.677204	0.469864	-1.44128	0.149507	0.592689	119.405	115.649	129.125	70.8468	80.9086
1429	ENSG00000163681	102.73	-0.762104	0.528538	-1.44191	0.149328	0.592689	182.538	89.7274	96.6747	83.4164	61.2944
1430	ENSG00000167797	50.2116	-1.02022	0.70797	-1.44105	0.14957	0.592689	100.19	56.8273	32.4503	23.9965	37.5939
1431	ENSG00000184787	210.638	0.584251	0.40523	1.44178	0.149365	0.592689	149.599	144.561	231.884	241.108	286.04
1432	ENSG00000117448	146.12	-0.644903	0.447847	-1.44001	0.149865	0.593392	227.83	132.597	152.111	114.269	103.792
1433	ENSG00000110330	120.037	-0.65266	0.453394	-1.4395	0.150009	0.593546	130.384	124.621	166.308	85.7018	93.1675
1434	ENSG00000113282	140.714	0.63936	0.444487	1.43842	0.150315	0.593824	150.971	99.6971	95.3226	167.975	189.604
1435	ENSG00000119705	175.27	0.6225	0.432961	1.43777	0.150498	0.593824	122.15	110.664	198.758	233.109	211.67
1436	ENSG00000180900	92.8235	-0.86319	0.600329	-1.43786	0.150473	0.593824	183.911	105.679	50.7035	55.9918	67.8324
1437	ENSG00000198721	78.8775	0.794717	0.552676	1.43794	0.15045	0.593824	37.0566	70.7849	74.3652	110.841	101.34
1438	ENSG00000065548	1270.89	-0.436049	0.304178	-1.43353	0.151706	0.594338	1704.6	1438.63	1114.13	1139.26	957.827
1439	ENSG00000089006	163.497	0.609241	0.424154	1.43637	0.150897	0.594338	108.425	125.618	170.364	225.11	187.969
1440	ENSG00000099377	52.5177	1.13492	0.791703	1.43352	0.151709	0.594338	8.23481	29.9091	67.6047	57.1345	99.7055
1441	ENSG00000105640	429.232	-0.653984	0.455617	-1.43538	0.151178	0.594338	735.643	559.301	213.631	284.53	353.056
1442	ENSG00000135241	45.3746	-0.991662	0.691296	-1.4345	0.15143	0.594338	64.506	34.894	70.3089	34.2807	22.8832
1443	ENSG00000141504	37.2214	1.01019	0.703127	1.4367	0.150802	0.594338	23.3319	28.9121	27.0419	59.4199	47.401
1444	ENSG00000160712	44.3621	1.15235	0.803499	1.43416	0.151526	0.594338	34.3117	46.8576	8.78861	41.1369	90.7157
1445	ENSG00000165406	37.6656	-1.12907	0.787103	-1.43446	0.151441	0.594338	63.1335	61.8122	19.6054	21.7111	22.066
1446	ENSG00000169991	48.4643	-0.944891	0.658798	-1.43426	0.151497	0.594338	61.761	77.7637	40.5628	31.9953	30.2386
1447	ENSG00000198171	135.667	-0.616738	0.429435	-1.43616	0.150956	0.594338	156.461	156.524	159.547	114.269	91.5329
1448	ENSG00000274422	34.9481	1.46926	1.02511	1.43327	0.151782	0.594338	0	35.8909	25.0137	69.7041	44.132
1449	ENSG00000076984	55.5079	1.02456	0.71524	1.43247	0.15201	0.594821	13.7247	38.8819	64.2245	99.4141	61.2944
1450	ENSG00000213891	41.7809	-1.2848	0.897963	-1.43079	0.15249	0.595876	78.2306	76.7667	9.46466	12.5696	31.8731
1451	ENSG00000224763	33.6038	-1.12309	0.784808	-1.43104	0.152418	0.595876	32.9392	54.8334	40.5628	27.4246	12.2589
1452	ENSG00000232174	105.449	-0.937325	0.655497	-1.42994	0.152733	0.596416	209.988	148.549	33.1263	62.848	72.736
1453	ENSG00000160199	31.5729	1.09093	0.763285	1.42926	0.15293	0.596775	19.2145	24.9243	20.9575	55.9918	36.7766
1454	ENSG00000138180	67.7529	0.799394	0.560079	1.42729	0.153497	0.597086	50.7813	44.8637	60.8442	106.27	76.005
1455	ENSG00000168701	104.362	-0.719085	0.503844	-1.4272	0.153523	0.597086	156.461	133.594	81.8017	73.1322	76.8223
1456	ENSG00000184939	30.9607	-1.22701	0.859759	-1.42715	0.153536	0.597086	32.9392	68.791	18.9293	13.7123	20.4315
1457	ENSG00000196262	83.9358	-0.724389	0.507081	-1.42855	0.153134	0.597086	104.308	100.694	93.9705	65.1334	55.5736
1458	ENSG00000196839	36.8964	-1.24155	0.869289	-1.42823	0.153226	0.597086	76.8582	26.9182	39.8868	34.2807	6.53807
1459	ENSG00000092820	245.683	0.509929	0.357771	1.4253	0.154072	0.597857	229.202	198.397	202.814	306.241	291.761
1460	ENSG00000155660	121.383	0.683365	0.479303	1.42575	0.153941	0.597857	109.797	68.791	114.252	187.401	126.675
1461	ENSG00000165525	456.912	0.486406	0.341216	1.42551	0.15401	0.597857	414.485	296.1	470.529	519.924	583.522
1462	ENSG00000240498	202.592	-0.659415	0.462747	-1.425	0.154156	0.597857	314.295	258.215	139.942	188.544	111.964
1463	ENSG00000182004	45.2548	-0.959345	0.673557	-1.4243	0.154361	0.598239	43.919	61.8122	62.8724	21.7111	35.9594
1464	ENSG00000099194	106.334	-0.781866	0.549831	-1.42201	0.155023	0.599939	197.635	108.67	77.0693	90.2725	58.0253
1465	ENSG00000116670	138.318	-0.733493	0.51593	-1.42169	0.155116	0.599939	267.631	117.643	108.844	110.841	86.6294
1466	ENSG00000152492	209.838	0.64595	0.454191	1.4222	0.154968	0.599939	90.5829	238.276	183.885	253.677	282.771
1467	ENSG00000112062	56.7789	-0.919186	0.646858	-1.421	0.155316	0.600249	108.425	55.8304	45.9712	37.7088	35.9594
1468	ENSG00000115350	56.6223	0.914922	0.644001	1.42068	0.155409	0.600249	30.1943	31.9031	62.8724	61.7053	96.4365
1469	ENSG00000004487	37.0371	-1.07664	0.758847	-1.41878	0.155963	0.601163	64.506	48.8516	27.7179	17.1404	26.9695
1470	ENSG00000112697	92.3757	-0.743986	0.52428	-1.41906	0.155881	0.601163	144.109	76.7667	109.52	74.2749	57.2081
1471	ENSG00000174720	208.605	0.545547	0.384354	1.41939	0.155787	0.601163	181.166	184.44	162.927	297.1	217.391
1472	ENSG00000133789	171.883	0.610649	0.430783	1.41753	0.156327	0.601749	97.4452	174.47	153.463	195.4	238.639
1473	ENSG00000136738	90.6553	0.702289	0.495347	1.41777	0.156257	0.601749	67.2509	72.7789	77.0693	134.837	101.34
1474	ENSG00000152082	304.951	-0.557196	0.393267	-1.41684	0.15653	0.602121	229.202	444.649	375.206	212.54	263.157
1475	ENSG00000012048	88.8489	0.811783	0.574353	1.41339	0.157542	0.602528	45.2914	48.8516	109.52	141.694	98.8883
1476	ENSG00000067955	136.067	-0.606076	0.428948	-1.41294	0.157675	0.602528	161.951	152.537	158.871	92.5579	114.416
1477	ENSG00000069011	387.87	-0.459978	0.325618	-1.41263	0.157765	0.602528	395.271	442.655	467.824	333.666	299.934
1478	ENSG00000075856	79.2651	0.940641	0.665221	1.41403	0.157354	0.602528	45.2914	20.9364	106.815	121.125	102.157
1479	ENSG00000087269	153.508	0.584489	0.413106	1.41487	0.157108	0.602528	122.15	145.558	116.28	181.688	201.863
1480	ENSG00000116106	47.4351	-1.06453	0.753916	-1.41199	0.157952	0.602528	57.6436	86.7364	35.1544	44.5649	13.0761
1481	ENSG00000118260	88.3658	-0.79621	0.563554	-1.41284	0.157703	0.602528	141.364	58.8213	118.984	71.9895	50.67
1482	ENSG00000143774	93.318	-0.700453	0.495475	-1.4137	0.15745	0.602528	104.308	105.679	121.012	57.1345	78.4568
1483	ENSG00000146083	51.5905	-0.942327	0.667321	-1.4121	0.157919	0.602528	65.8784	88.7304	37.1826	28.5673	37.5939
1484	ENSG00000152104	393.957	0.482396	0.341696	1.41177	0.158018	0.602528	329.392	281.146	409.008	435.365	514.873
1485	ENSG00000185104	152.438	-0.741383	0.5238	-1.41539	0.156953	0.602528	230.575	236.282	78.4214	118.84	98.071
1486	ENSG00000185803	30.3952	-1.20933	0.855039	-1.41436	0.157256	0.602528	41.174	54.8334	22.3095	9.14152	24.5178
1487	ENSG00000242244	30.9598	-1.27583	0.901299	-1.41555	0.156908	0.602528	46.6639	61.8122	12.8449	22.8538	10.6244
1488	ENSG00000090674	34.5295	-1.12694	0.798564	-1.4112	0.158184	0.602708	46.6639	50.8455	34.4784	30.8526	9.8071
1489	ENSG00000128626	62.9169	-0.826999	0.586155	-1.41089	0.158277	0.602708	86.4655	84.7425	57.464	49.1357	36.7766
1490	ENSG00000032444	33.2771	1.07164	0.760966	1.40826	0.159055	0.605263	17.8421	19.9394	31.0982	58.2772	39.2284
1491	ENSG00000088888	351.137	0.701227	0.498164	1.40762	0.159243	0.605401	133.129	206.373	501.627	347.378	567.177
1492	ENSG00000144567	104.84	0.685788	0.487268	1.40741	0.159305	0.605401	90.5829	98.7001	64.2245	115.412	155.279
1493	ENSG00000166801	78.894	0.743779	0.528769	1.40662	0.159539	0.605886	72.7408	46.8576	66.9286	101.699	106.244
1494	ENSG00000015153	119.876	-0.6976	0.497184	-1.4031	0.160586	0.606865	186.656	151.54	87.21	79.9883	93.9847
1495	ENSG00000044115	164.502	0.563692	0.402408	1.4008	0.161274	0.606865	145.482	134.591	134.533	183.973	223.929
1496	ENSG00000083857	121.254	0.627459	0.446649	1.40481	0.160077	0.606865	90.5829	106.676	101.407	135.98	171.624
1497	ENSG00000091640	125.221	-0.624781	0.445579	-1.40218	0.160861	0.606865	131.757	161.509	143.998	83.4164	105.426
1498	ENSG00000100804	404.39	-0.481841	0.343407	-1.40312	0.160581	0.606865	531.145	372.867	464.444	369.089	284.406
1499	ENSG00000109536	104.53	0.662512	0.47267	1.40164	0.161023	0.606865	96.0727	89.7274	68.9568	131.409	136.482
1500	ENSG00000120885	112.869	0.651555	0.464072	1.404	0.16032	0.606865	109.797	92.7183	73.6891	145.122	143.02
1501	ENSG00000165502	50.4193	0.9409	0.670821	1.40261	0.160733	0.606865	21.9595	31.9031	56.1119	62.848	79.2741
1502	ENSG00000174136	62.2926	-0.896701	0.639653	-1.40185	0.160959	0.606865	112.542	72.7789	44.6191	30.8526	50.67
1503	ENSG00000196937	52.0224	-0.933846	0.666573	-1.40096	0.161225	0.606865	94.7003	45.8606	52.7317	25.1392	41.6802
1504	ENSG00000198730	318.595	0.513243	0.366205	1.40152	0.16106	0.606865	225.085	309.061	281.236	466.218	311.375
1505	ENSG00000229994	69.36	0.757701	0.541072	1.40037	0.161402	0.606865	59.0161	54.8334	49.3514	93.7006	89.8984
1506	ENSG00000234742	167.083	-0.651762	0.463881	-1.40502	0.160016	0.606865	127.639	286.131	172.392	134.837	114.416
1507	ENSG00000256849	83.4563	-0.878332	0.627042	-1.40076	0.161287	0.606865	116.66	145.558	44.6191	37.7088	72.736
1508	ENSG00000272047	54.4325	2.35781	1.68336	1.40066	0.161316	0.606865	5.48987	0.996971	54.7598	77.7029	133.213
1509	ENSG00000079332	519.972	-0.524283	0.375321	-1.39689	0.162446	0.607724	687.606	722.804	367.093	356.519	465.837
1510	ENSG00000135372	194.868	0.581431	0.415608	1.39899	0.161816	0.607724	177.048	113.655	196.73	266.247	220.66
1511	ENSG00000136238	1423.62	-0.41834	0.299662	-1.39604	0.162703	0.607724	1817.15	1724.76	1208.1	1143.83	1224.25
1512	ENSG00000138685	108.426	-0.722964	0.517114	-1.39807	0.162091	0.607724	91.9553	101.691	191.997	78.8456	77.6395
1513	ENSG00000141905	827.537	0.408772	0.292552	1.39726	0.162335	0.607724	662.902	730.779	800.44	1047.85	895.715
1514	ENSG00000145734	240.301	0.654707	0.468914	1.39622	0.162648	0.607724	104.308	165.497	315.038	285.673	330.99
1515	ENSG00000163902	83.1682	0.764607	0.547565	1.39638	0.162601	0.607724	46.6639	78.7607	68.9568	140.551	80.9086
1516	ENSG00000188529	360.42	-0.482174	0.34482	-1.39834	0.162012	0.607724	439.19	458.606	322.474	298.242	283.589
1517	ENSG00000196792	49.7619	-0.941665	0.674393	-1.39631	0.16262	0.607724	93.3278	38.8819	52.7317	31.9953	31.8731
1518	ENSG00000269821	75.9138	-0.741941	0.531244	-1.39661	0.162531	0.607724	102.935	88.7304	79.7735	58.2772	49.8528
1519	ENSG00000157895	46.6405	1.19508	0.856824	1.39477	0.163084	0.608346	57.6436	3.98788	31.0982	74.2749	66.1979
1520	ENSG00000181704	69.3617	0.827437	0.593123	1.39505	0.163001	0.608346	41.174	40.8758	76.3933	73.1322	115.233
1521	ENSG00000104723	51.8655	-0.912164	0.654175	-1.39437	0.163205	0.608397	37.0566	77.7637	76.3933	35.4234	32.6903
1522	ENSG00000138675	67.4267	-0.842343	0.604476	-1.39351	0.163466	0.608968	75.4857	119.636	50.7035	47.993	43.3147
1523	ENSG00000165124	37.6037	0.979868	0.70372	1.39241	0.163798	0.609806	30.1943	21.9334	29.07	59.4199	47.401
1524	ENSG00000090266	123.323	-0.639956	0.459776	-1.39189	0.163957	0.609998	123.522	182.446	125.745	98.2714	86.6294
1525	ENSG00000204120	573.306	0.432239	0.310753	1.39094	0.164243	0.610661	498.206	579.24	431.994	673.045	684.045
1526	ENSG00000151718	146.986	0.588157	0.423035	1.39033	0.164429	0.610953	118.032	110.664	137.914	205.684	162.634
1527	ENSG00000134531	210.832	0.612511	0.441209	1.38826	0.165059	0.612089	171.558	109.667	239.997	313.097	219.842
1528	ENSG00000171603	96.3978	0.678159	0.48842	1.38848	0.164992	0.612089	74.1132	64.8031	93.9705	125.696	123.406
1529	ENSG00000172301	206.981	-0.557833	0.401781	-1.3884	0.165016	0.612089	297.825	183.443	231.208	173.689	148.741
1530	ENSG00000031081	65.1717	-0.875043	0.630925	-1.38692	0.165466	0.61299	38.4291	103.685	96.6747	38.8515	48.2182
1531	ENSG00000119777	65.24	-0.799314	0.576909	-1.38551	0.165896	0.61299	60.3886	94.7122	80.4496	51.4211	39.2284
1532	ENSG00000147419	297.835	0.529074	0.381751	1.38591	0.165773	0.61299	311.55	230.3	218.363	281.102	447.858
1533	ENSG00000153487	35.4916	-1.07171	0.7735	-1.38554	0.165888	0.61299	63.1335	38.8819	33.1263	13.7123	28.604
1534	ENSG00000168438	61.5251	0.83662	0.604066	1.38498	0.166059	0.61299	54.8987	40.8758	44.6191	110.841	56.3908
1535	ENSG00000184076	80.0572	0.730529	0.527434	1.38506	0.166033	0.61299	52.1538	59.8182	77.7454	93.7006	116.868
1536	ENSG00000273870	329.396	-0.629212	0.454294	-1.38503	0.166043	0.61299	580.554	390.812	180.505	243.393	251.716
1537	ENSG00000060237	537.676	-0.438972	0.317076	-1.38444	0.166224	0.613203	627.218	676.943	498.247	459.362	426.609
1538	ENSG00000123080	32.6635	1.07104	0.774409	1.38304	0.166651	0.614377	15.0971	33.897	18.9293	47.993	47.401
1539	ENSG00000070423	72.477	-0.770873	0.557694	-1.38225	0.166895	0.614876	101.563	97.7031	61.5203	52.5638	49.0355
1540	ENSG00000007384	131.401	-0.632874	0.458084	-1.38157	0.167104	0.615247	194.89	151.54	113.576	94.8433	102.157
1541	ENSG00000115211	224.011	-0.541003	0.391722	-1.38109	0.167252	0.615286	315.668	200.391	252.165	190.829	161
1542	ENSG00000171914	72.3972	0.747194	0.541121	1.38083	0.167332	0.615286	67.2509	49.8485	54.0838	84.5591	106.244
1543	ENSG00000067057	125.664	-0.64147	0.465649	-1.37758	0.168332	0.615331	105.68	158.518	175.772	84.5591	103.792
1544	ENSG00000100906	59.4042	0.835289	0.608647	1.37237	0.169948	0.615331	63.1335	39.8788	33.1263	91.4152	69.467
1545	ENSG00000105849	148.956	0.611324	0.445149	1.3733	0.169659	0.615331	83.7205	131.6	152.787	191.972	184.7
1546	ENSG00000106628	58.1797	0.840831	0.611783	1.37439	0.169319	0.615331	31.5668	38.8819	61.5203	84.5591	74.3705
1547	ENSG00000113319	46.541	-0.906228	0.659289	-1.37455	0.16927	0.615331	63.1335	40.8758	67.6047	30.8526	30.2386
1548	ENSG00000117713	79.0183	0.751467	0.546753	1.37442	0.169312	0.615331	41.174	79.7577	64.9005	94.8433	114.416
1549	ENSG00000120370	31.3265	-1.09622	0.795934	-1.37728	0.168427	0.615331	48.0364	47.8546	23.6616	18.283	18.7969
1550	ENSG00000124226	44.0115	1.06971	0.777477	1.37588	0.16886	0.615331	10.9797	31.9031	47.9993	89.1299	40.0457
1551	ENSG00000125844	2077.09	0.368452	0.268366	1.37295	0.169769	0.615331	1858.32	2023.85	1699.58	2516.2	2287.51
1552	ENSG00000135040	97.2026	0.661905	0.48072	1.3769	0.168542	0.615331	86.4655	75.7698	74.3652	138.266	111.147
1553	ENSG00000138496	62.2804	0.821413	0.596857	1.37623	0.168751	0.615331	49.4088	62.8091	31.0982	82.2737	85.8121
1554	ENSG00000143376	121.722	-0.647471	0.47071	-1.37552	0.16897	0.615331	142.737	179.455	104.787	98.2714	83.3604
1555	ENSG00000144228	32.446	-1.21114	0.882478	-1.37243	0.169931	0.615331	45.2914	66.797	14.197	11.4269	24.5178
1556	ENSG00000157106	183.979	0.548178	0.397779	1.3781	0.168173	0.615331	150.971	130.603	183.885	223.967	230.467
1557	ENSG00000163001	79.3349	0.791449	0.574936	1.37659	0.16864	0.615331	52.1538	38.8819	92.6184	93.7006	119.32
1558	ENSG00000168159	339.723	0.47967	0.349308	1.3732	0.169689	0.615331	289.591	237.279	352.896	415.939	402.908
1559	ENSG00000169139	211.397	-0.541208	0.392186	-1.37998	0.167594	0.615331	238.809	212.355	273.123	195.4	137.299
1560	ENSG00000169221	158.551	-0.658265	0.478408	-1.37595	0.168837	0.615331	262.141	190.421	105.463	115.412	119.32
1561	ENSG00000172831	92.893	0.724262	0.526946	1.37445	0.169301	0.615331	49.4088	87.7334	83.1538	148.55	95.6192
1562	ENSG00000178177	51.8931	0.861317	0.625613	1.37676	0.168587	0.615331	43.919	43.8667	29.7461	82.2737	59.6599
1563	ENSG00000182326	54.3224	0.846275	0.614408	1.37738	0.168394	0.615331	30.1943	40.8758	52.0556	70.8468	77.6395
1564	ENSG00000198836	58.4961	0.989085	0.718233	1.37711	0.168479	0.615331	10.9797	49.8485	64.2245	85.7018	81.7258
1565	ENSG00000240376	149.105	-0.863939	0.628685	-1.3742	0.16938	0.615331	318.412	171.479	56.7879	58.2772	140.568
1566	ENSG00000250321	138.961	-0.631345	0.459775	-1.37316	0.169703	0.615331	116.66	208.367	160.223	118.84	90.7157
1567	ENSG00000049192	30.3357	-1.19612	0.872537	-1.37085	0.170422	0.615704	68.6234	15.9515	33.1263	15.9977	17.9797
1568	ENSG00000064393	87.1864	-0.808106	0.589545	-1.37073	0.170459	0.615704	164.696	53.8364	97.3508	68.5614	51.4873
1569	ENSG00000070882	63.0963	0.871752	0.636097	1.37047	0.17054	0.615704	28.8218	43.8667	68.9568	59.4199	114.416
1570	ENSG00000095380	164.795	-0.565064	0.412364	-1.37031	0.170592	0.615704	223.712	186.434	158.195	131.409	124.223
1571	ENSG00000204580	50.9199	-1.12378	0.820103	-1.3703	0.170594	0.615704	130.384	48.8516	16.2251	23.9965	35.1421
1572	ENSG00000140319	850.166	-0.41494	0.303053	-1.3692	0.170937	0.616548	886.614	807.546	1139.14	701.612	715.918
1573	ENSG00000103942	85.7614	-1.01069	0.738614	-1.36836	0.1712	0.617104	112.542	170.482	39.8868	15.9977	89.8984
1574	ENSG00000083097	40.4459	-1.00454	0.7347	-1.36727	0.17154	0.617543	54.8987	67.794	29.07	30.8526	19.6142
1575	ENSG00000176692	43.6273	-0.970179	0.709447	-1.36751	0.171464	0.617543	46.6639	78.7607	37.1826	34.2807	21.2487
1576	ENSG00000146416	97.1725	-0.73412	0.537762	-1.36514	0.17221	0.618776	129.012	147.552	70.3089	83.4164	55.5736
1577	ENSG00000149806	1469.88	0.380248	0.278429	1.36569	0.172036	0.618776	1265.42	1485.49	1184.43	1628.33	1785.71
1578	ENSG00000168872	39.8245	-0.985463	0.72186	-1.36517	0.172199	0.618776	65.8784	52.8394	30.4221	26.2819	23.7005
1579	ENSG00000204392	73.0588	-0.828952	0.607764	-1.36394	0.172587	0.619741	111.17	109.667	45.2951	41.1369	58.0253
1580	ENSG00000005810	170.642	0.561875	0.412399	1.36245	0.173055	0.621025	159.206	155.527	115.604	236.537	186.335
1581	ENSG00000134897	102.865	0.753278	0.553641	1.36059	0.173644	0.621174	49.4088	62.8091	129.125	111.984	161
1582	ENSG00000171316	51.8315	-0.997774	0.732817	-1.36156	0.173337	0.621174	79.6031	92.7183	22.3095	28.5673	35.9594
1583	ENSG00000197265	72.3666	0.841869	0.618454	1.36125	0.173436	0.621174	35.6842	37.8849	90.5903	79.9883	117.685
1584	ENSG00000212802	133.654	-0.678183	0.498428	-1.36065	0.173626	0.621174	207.243	164.5	100.055	124.553	71.9187
1585	ENSG00000227437	253.785	-0.688955	0.506095	-1.36132	0.173414	0.621174	448.797	332.988	116.956	151.978	218.208
1586	ENSG00000104689	39.5621	-1.00242	0.738018	-1.35826	0.17438	0.622236	42.5465	39.8788	65.5765	34.2807	15.5279
1587	ENSG00000120675	99.0598	0.786326	0.578703	1.35877	0.174219	0.622236	35.6842	67.794	125.745	145.122	120.954
1588	ENSG00000162980	34.7897	-1.11374	0.819894	-1.3584	0.174338	0.622236	34.3117	44.8637	54.0838	7.99883	32.6903
1589	ENSG00000170876	77.3244	0.776318	0.571298	1.35887	0.174189	0.622236	32.9392	78.7607	68.2807	97.1287	109.513
1590	ENSG00000110768	88.7984	-0.750156	0.552786	-1.35705	0.174767	0.623225	141.364	115.649	61.5203	55.9918	69.467
1591	ENSG00000130119	301.626	0.598467	0.441399	1.35584	0.175149	0.623863	120.777	329	299.489	414.797	344.066
1592	ENSG00000237550	109.89	0.647043	0.477244	1.35579	0.175166	0.623863	82.3481	115.649	70.9849	138.266	142.203
1593	ENSG00000110075	84.2603	-0.826604	0.610123	-1.35482	0.175476	0.624186	174.303	79.7577	52.7317	54.8491	59.6599
1594	ENSG00000163125	41.2512	-0.927943	0.684855	-1.35495	0.175434	0.624186	42.5465	62.8091	47.3233	27.4246	26.1523
1595	ENSG00000157657	144.382	-0.593548	0.438497	-1.35359	0.175866	0.624395	207.243	163.503	130.477	106.27	114.416
1596	ENSG00000182197	132.963	0.688915	0.50891	1.35371	0.17583	0.624395	59.0161	96.7062	163.603	165.69	179.797
1597	ENSG00000239559	80.7224	-0.704313	0.520312	-1.35364	0.175853	0.624395	86.4655	112.658	87.21	61.7053	55.5736
1598	ENSG00000012983	307.85	-0.546962	0.404728	-1.35143	0.176557	0.625704	403.505	438.667	215.659	212.54	268.878
1599	ENSG00000162408	51.271	0.882186	0.652792	1.35141	0.176566	0.625704	43.919	32.9	38.5347	44.5649	96.4365
1600	ENSG00000167740	29.4504	1.60396	1.18662	1.3517	0.17647	0.625704	0	3.98788	43.943	44.5649	54.7563
1601	ENSG00000089486	89.5715	-0.684073	0.50661	-1.3503	0.176921	0.626338	100.19	128.609	87.8861	61.7053	69.467
1602	ENSG00000148468	88.6983	0.690054	0.511091	1.35016	0.176965	0.626338	63.1335	91.7213	58.8161	121.125	108.695
1603	ENSG00000100211	59.7462	-0.892448	0.661778	-1.34856	0.177478	0.62776	116.66	65.8001	37.8586	34.2807	44.132
1604	ENSG00000048991	98.4345	-0.690816	0.512992	-1.34664	0.178096	0.628076	134.502	132.597	81.8017	58.2772	84.9949
1605	ENSG00000083844	44.8487	-1.16687	0.866286	-1.34698	0.177986	0.628076	10.9797	113.655	47.9993	31.9953	19.6142
1606	ENSG00000089157	446.593	0.420659	0.312617	1.34561	0.17843	0.628076	413.113	368.879	398.192	514.211	538.573
1607	ENSG00000134779	89.1582	0.732117	0.543809	1.34628	0.178213	0.628076	52.1538	58.8213	100.055	92.5579	142.203
1608	ENSG00000169696	44.7392	-0.902722	0.670913	-1.34551	0.17846	0.628076	54.8987	40.8758	68.9568	31.9953	26.9695
1609	ENSG00000171302	87.9156	-0.74749	0.555502	-1.34561	0.178428	0.628076	71.3683	117.643	125.745	42.2795	82.5431
1610	ENSG00000172380	202.054	-0.538369	0.399698	-1.34694	0.178	0.628076	179.793	285.134	227.152	164.547	153.645
1611	ENSG00000175073	32.6203	1.04377	0.774584	1.34752	0.177813	0.628076	26.0769	27.9152	14.873	58.2772	35.9594
1612	ENSG00000175573	234.817	-0.6112	0.45436	-1.34519	0.178564	0.628076	428.21	224.318	165.631	185.116	170.807
1613	ENSG00000116497	102.798	-0.682509	0.507773	-1.34412	0.178909	0.628508	104.308	167.491	91.2663	82.2737	68.6497
1614	ENSG00000119326	150.374	0.592837	0.440995	1.34432	0.178846	0.628508	149.599	133.594	92.6184	161.119	214.939
1615	ENSG00000077147	388.335	-0.475167	0.353976	-1.34237	0.179475	0.628982	437.817	526.4	348.84	267.39	361.228
1616	ENSG00000114062	215.33	0.541804	0.403593	1.34245	0.17945	0.628982	178.421	166.494	200.786	334.808	196.142
1617	ENSG00000156261	171.654	-0.532589	0.396672	-1.34264	0.179388	0.628982	207.243	181.449	198.758	141.694	129.127
1618	ENSG00000186501	31.7287	1.02962	0.767037	1.34234	0.179487	0.628982	17.8421	19.9394	29.07	52.5638	39.2284
1619	ENSG00000162623	60.84	-0.853452	0.636109	-1.34168	0.179701	0.629343	61.761	57.8243	102.759	26.2819	55.5736
1620	ENSG00000013810	41.4373	1.0096	0.753411	1.34004	0.180234	0.62941	10.9797	34.894	41.9149	66.276	53.1218
1621	ENSG00000041357	653.837	0.441126	0.329221	1.33991	0.180275	0.62941	555.849	446.643	712.553	857.018	697.121
1622	ENSG00000111711	48.5203	-0.972675	0.72531	-1.34105	0.179905	0.62941	83.7205	71.7819	25.6898	37.7088	23.7005
1623	ENSG00000124006	74.7456	-0.821155	0.612653	-1.34033	0.180139	0.62941	145.482	75.7698	50.7035	44.5649	57.2081
1624	ENSG00000278540	33.8644	0.975251	0.727764	1.34006	0.180224	0.62941	23.3319	24.9243	25.0137	44.5649	51.4873
1625	ENSG00000101966	193.912	0.769316	0.5745	1.3391	0.180537	0.629547	43.919	141.57	267.039	228.538	288.492
1626	ENSG00000175826	31.8232	-1.05893	0.790593	-1.33941	0.180436	0.629547	56.2712	25.9212	38.5347	17.1404	21.2487
1627	ENSG00000126067	144.612	-0.572534	0.427669	-1.33873	0.180657	0.629581	193.518	137.582	168.336	110.841	112.782
1628	ENSG00000107957	362.55	0.486096	0.363271	1.33811	0.18086	0.6299	242.927	377.852	315.714	514.211	362.045
1629	ENSG00000060749	187.701	-0.530048	0.397016	-1.33508	0.18185	0.629937	188.028	226.312	227.828	127.981	168.355
1630	ENSG00000069275	8279.43	-0.43062	0.322558	-1.33502	0.18187	0.629937	11963.8	9815.18	5919.47	7006.98	6691.71
1631	ENSG00000112763	45.0828	0.888139	0.664614	1.33632	0.181443	0.629937	23.3319	35.8909	41.2389	68.5614	56.3908
1632	ENSG00000124225	63.7193	-1.04352	0.781339	-1.33555	0.181697	0.629937	50.7813	24.9243	164.955	23.9965	53.9391
1633	ENSG00000124228	230.261	0.577447	0.432649	1.33468	0.181982	0.629937	116.66	195.406	263.658	327.952	247.629
1634	ENSG00000145041	45.0433	0.965486	0.722489	1.33633	0.18144	0.629937	39.8016	15.9515	41.9149	83.4164	44.132
1635	ENSG00000151491	172.769	-0.528785	0.395453	-1.33716	0.18117	0.629937	205.87	185.437	199.434	143.979	129.127
1636	ENSG00000156471	63.6338	0.774294	0.579462	1.33623	0.181474	0.629937	39.8016	48.8516	59.4921	100.557	69.467
1637	ENSG00000163832	59.4201	0.87316	0.654117	1.33487	0.181919	0.629937	31.5668	34.894	66.9286	52.5638	111.147
1638	ENSG00000164610	111.621	-0.79509	0.594356	-1.33773	0.180983	0.629937	244.299	86.7364	73.0131	61.7053	92.3502
1639	ENSG00000170955	404.534	-0.518102	0.388783	-1.33263	0.182655	0.631881	635.452	457.61	287.996	330.238	311.375
1640	ENSG00000071054	2786.21	-0.443839	0.333292	-1.33168	0.182965	0.63191	3860.75	3522.3	1966.62	2539.06	2042.33
1641	ENSG00000170348	163.771	0.731825	0.549591	1.33158	0.182998	0.63191	155.089	47.8546	185.237	269.675	161
1642	ENSG00000233913	607.7	-0.675104	0.506958	-1.33168	0.182966	0.63191	1128.17	801.564	214.983	357.662	536.121
1643	ENSG00000095303	39.5588	-1.18556	0.891102	-1.33045	0.183372	0.632523	71.3683	7.97577	73.6891	19.4257	25.335
1644	ENSG00000120265	154.112	-0.595329	0.447773	-1.32953	0.183672	0.632523	177.048	228.306	129.801	100.557	134.848
1645	ENSG00000162664	99.7072	0.662156	0.497828	1.33009	0.183488	0.632523	101.563	56.8273	84.5059	125.696	129.944
1646	ENSG00000166135	199.568	-0.561923	0.422665	-1.32948	0.183691	0.632523	293.708	237.279	156.843	170.261	139.751
1647	ENSG00000197429	42.8431	1.10319	0.829871	1.32935	0.183733	0.632523	5.48987	37.8849	43.943	81.131	45.7665
1648	ENSG00000074201	57.9216	-0.850089	0.639726	-1.32883	0.183903	0.632724	49.4088	106.676	55.4358	33.138	44.9492
1649	ENSG00000111358	45.8956	0.879593	0.664117	1.32445	0.185352	0.632764	26.0769	45.8606	31.0982	53.7065	72.736
1650	ENSG00000113712	554.916	-0.430862	0.325294	-1.32453	0.185327	0.632764	752.112	588.213	517.176	419.367	497.71
1651	ENSG00000114125	49.0463	-0.944129	0.71223	-1.3256	0.184974	0.632764	39.8016	103.685	38.5347	35.4234	27.7868
1652	ENSG00000122483	82.8187	-0.720358	0.54392	-1.32438	0.185376	0.632764	124.895	71.7819	98.0268	71.9895	47.401
1653	ENSG00000123131	466.594	-0.551043	0.416146	-1.32416	0.185451	0.632764	800.149	508.455	296.109	318.811	409.446
1654	ENSG00000151461	209.52	0.51468	0.388043	1.32635	0.184724	0.632764	185.283	183.443	167.66	302.813	208.401
1655	ENSG00000152795	615.677	-0.453829	0.342104	-1.32658	0.184646	0.632764	794.659	793.589	483.374	455.933	550.832
1656	ENSG00000163719	36.5084	-1.02042	0.769172	-1.32665	0.184625	0.632764	26.0769	67.794	43.267	27.4246	17.9797
1657	ENSG00000166313	87.1921	-0.771758	0.582864	-1.32408	0.185477	0.632764	93.3278	163.503	56.7879	65.1334	57.2081
1658	ENSG00000171307	81.2078	-0.799285	0.603172	-1.32514	0.185126	0.632764	145.482	102.688	45.9712	51.4211	60.4771
1659	ENSG00000173726	65.9286	0.849375	0.639388	1.32842	0.18404	0.632764	23.3319	76.7667	49.3514	73.1322	107.061
1660	ENSG00000184182	63.7197	-0.844017	0.637359	-1.32424	0.185423	0.632764	61.761	124.621	45.9712	44.5649	41.6802
1661	ENSG00000185112	64.5114	0.748001	0.564779	1.32442	0.185365	0.632764	50.7813	50.8455	50.7035	69.7041	100.523
1662	ENSG00000254470	52.7374	0.828917	0.625726	1.32473	0.185261	0.632764	27.4494	46.8576	45.9712	78.8456	64.5634
1663	ENSG00000005238	113.279	-0.667907	0.504707	-1.32336	0.185717	0.632942	107.052	187.43	104.787	67.4187	99.7055
1664	ENSG00000224800	2270.27	-1.00045	0.756056	-1.32325	0.185752	0.632942	4047.41	3475.44	991.761	1122.12	1714.61
1665	ENSG00000115977	255.76	0.527608	0.398991	1.32235	0.18605	0.633196	245.672	142.567	263.658	330.238	296.665
1666	ENSG00000162819	32.8551	1.21948	0.922107	1.32249	0.186005	0.633196	2.74494	36.8879	24.3377	42.2795	58.0253
1667	ENSG00000065135	131.86	-0.678653	0.514156	-1.31993	0.186857	0.633659	87.8379	179.455	198.082	69.7041	124.223
1668	ENSG00000080503	865.177	-0.451349	0.341836	-1.32037	0.186712	0.633659	1178.95	1100.66	629.4	699.327	717.553
1669	ENSG00000101132	75.7881	-0.773447	0.585458	-1.3211	0.186469	0.633659	120.777	97.7031	54.7598	41.1369	64.5634
1670	ENSG00000129559	612.859	-0.500686	0.379249	-1.32021	0.186767	0.633659	905.829	770.658	407.656	434.222	545.929
1671	ENSG00000150093	371.036	0.434387	0.329075	1.32003	0.186826	0.633659	321.157	321.025	333.967	391.943	487.086
1672	ENSG00000223445	49.9614	-0.855805	0.648203	-1.32027	0.186744	0.633659	72.7408	63.8061	45.9712	41.1369	26.1523
1673	ENSG00000166068	145.51	-0.614153	0.465409	-1.3196	0.186969	0.633662	241.554	141.57	124.393	103.985	116.051
1674	ENSG00000145907	222.309	-0.521876	0.395645	-1.31905	0.187152	0.633902	297.825	277.158	184.561	182.83	169.172
1675	ENSG00000128915	39.7205	0.931243	0.706376	1.31834	0.18739	0.634329	34.3117	19.9394	33.1263	66.276	44.9492
1676	ENSG00000143079	107.299	0.729342	0.554426	1.31549	0.188345	0.637157	46.6639	73.7758	133.181	172.546	110.33
1677	ENSG00000170653	75.9801	-0.828352	0.62984	-1.31518	0.18845	0.637157	115.287	117.643	43.267	68.5614	35.1421
1678	ENSG00000174099	365.04	0.529799	0.403024	1.31456	0.188658	0.63748	178.421	383.834	366.417	510.783	385.746
1679	ENSG00000101412	186.544	-0.742609	0.565511	-1.31317	0.189127	0.638321	270.376	329.997	66.9286	148.55	116.868
1680	ENSG00000123066	397.43	-0.472863	0.360189	-1.31282	0.189245	0.638321	550.359	455.616	336.671	369.089	275.416
1681	ENSG00000197712	831.775	0.37101	0.282547	1.31309	0.189152	0.638321	753.485	747.728	732.159	981.571	943.933
1682	ENSG00000060688	29.7383	-1.05742	0.806757	-1.3107	0.189958	0.638475	37.0566	49.8485	25.6898	20.5684	15.5279
1683	ENSG00000072501	626.975	0.386914	0.295287	1.3103	0.190095	0.638475	584.671	567.276	523.26	729.036	730.629
1684	ENSG00000099968	39.2103	0.92635	0.706733	1.31075	0.189942	0.638475	27.4494	38.8819	20.2814	57.1345	52.3045
1685	ENSG00000108819	128.176	-0.64845	0.494406	-1.31157	0.189665	0.638475	179.793	184.44	85.858	95.986	94.802
1686	ENSG00000117395	260.968	0.484351	0.369553	1.31064	0.189979	0.638475	244.299	254.228	177.124	332.523	296.665
1687	ENSG00000131013	68.5792	0.80811	0.616871	1.31001	0.190191	0.638475	28.8218	46.8576	81.8017	79.9883	105.426
1688	ENSG00000231721	76.663	-0.833015	0.634956	-1.31193	0.189545	0.638475	89.2104	41.8728	147.378	63.9907	40.8629
1689	ENSG00000271428	47.1676	-0.942401	0.718506	-1.31161	0.189651	0.638475	63.1335	85.7395	26.3658	31.9953	28.604
1690	ENSG00000186298	103.989	-0.621567	0.47471	-1.30936	0.190412	0.638839	129.012	126.615	107.491	68.5614	88.2639
1691	ENSG00000232734	31.0292	-1.06221	0.811479	-1.30898	0.190541	0.638892	41.174	47.8546	28.394	26.2819	11.4416
1692	ENSG00000011275	158.75	0.595085	0.454819	1.3084	0.190737	0.638979	79.6031	155.527	159.547	187.401	211.67
1693	ENSG00000099814	86.2607	-0.808144	0.617734	-1.30824	0.190792	0.638979	107.052	160.512	45.2951	45.7076	72.736
1694	ENSG00000153015	108.871	0.645853	0.494177	1.30693	0.191237	0.639714	86.4655	63.8061	115.604	159.977	118.502
1695	ENSG00000197448	55.9107	0.870405	0.665938	1.30704	0.191201	0.639714	19.2145	47.8546	58.14	91.4152	62.9289
1696	ENSG00000090263	67.0528	0.978302	0.74877	1.30655	0.191367	0.639771	8.23481	75.7698	60.1682	114.269	76.8223
1697	ENSG00000143033	156.159	-0.721476	0.552348	-1.3062	0.191485	0.639788	330.765	141.57	84.5059	106.27	117.685
1698	ENSG00000090470	69.2338	0.79927	0.612495	1.30494	0.191913	0.640363	67.2509	26.9182	66.2526	75.4176	110.33
1699	ENSG00000108312	203.627	0.546643	0.419407	1.30337	0.192448	0.640363	155.089	128.609	231.208	283.387	219.842
1700	ENSG00000133424	29.4543	-1.02948	0.789404	-1.30412	0.192191	0.640363	39.8016	36.8879	34.4784	14.855	21.2487
1701	ENSG00000146247	209.606	0.5066	0.388659	1.30346	0.192418	0.640363	152.344	201.388	183.885	291.386	219.025
1702	ENSG00000163827	36.6227	1.32916	1.01949	1.30375	0.192318	0.640363	0	27.9152	39.8868	66.276	49.0355
1703	ENSG00000231084	63.9525	-0.91828	0.703724	-1.30489	0.191932	0.640363	133.129	76.7667	27.0419	35.4234	47.401
1704	ENSG00000277443	545.8	0.539193	0.413323	1.30453	0.192052	0.640363	684.861	456.613	246.081	764.46	576.984
1705	ENSG00000132589	360.614	-0.56457	0.433521	-1.30229	0.192817	0.640852	509.185	514.437	220.391	212.54	346.518
1706	ENSG00000139343	61.0942	-0.91124	0.699727	-1.30228	0.192821	0.640852	115.287	83.7455	27.0419	31.9953	47.401
1707	ENSG00000170561	52.7177	1.17029	0.899342	1.30127	0.193164	0.641618	10.9797	6.97879	86.534	82.2737	76.8223
1708	ENSG00000075711	74.5451	-0.782063	0.601656	-1.29985	0.193652	0.642289	93.3278	80.7546	93.9705	77.7029	26.9695
1709	ENSG00000115295	74.5608	0.796996	0.613457	1.29919	0.19388	0.642289	27.4494	53.8364	90.5903	91.4152	109.513
1710	ENSG00000122873	79.7453	0.733154	0.564107	1.29967	0.193713	0.642289	35.6842	66.797	85.858	107.413	102.975
1711	ENSG00000128283	33.9743	0.976054	0.751068	1.29956	0.193754	0.642289	30.1943	16.9485	26.3658	57.1345	39.2284
1712	ENSG00000143621	93.6198	0.648552	0.499353	1.29879	0.194018	0.642289	68.6234	89.7274	70.3089	140.551	98.8883
1713	ENSG00000255302	529.633	-0.40818	0.314298	-1.2987	0.194046	0.642289	640.942	624.104	498.247	423.938	460.934
1714	ENSG00000021762	60.7032	0.968501	0.746752	1.29695	0.194648	0.643411	10.9797	35.8909	83.8298	90.2725	82.5431
1715	ENSG00000101350	274.608	0.501516	0.386592	1.29728	0.194536	0.643411	182.538	233.291	290.024	270.818	396.37
1716	ENSG00000127870	31.4656	-0.999901	0.771097	-1.29673	0.194725	0.643411	34.3117	49.8485	33.8023	20.5684	18.7969
1717	ENSG00000013583	29.8954	1.17533	0.907173	1.2956	0.195114	0.644312	5.48987	14.9546	38.5347	42.2795	48.2182
1718	ENSG00000132467	91.5045	-0.653681	0.504666	-1.29527	0.195225	0.644312	131.757	104.682	85.1819	69.7041	66.1979
1719	ENSG00000001036	39.5233	1.05951	0.819474	1.29292	0.196039	0.644341	9.60727	18.9424	53.4077	50.2784	65.3807
1720	ENSG00000003436	91.863	0.71183	0.550387	1.29333	0.195898	0.644341	39.8016	91.7213	87.21	141.694	98.8883
1721	ENSG00000108828	395.907	0.453099	0.350528	1.29262	0.196143	0.644341	253.906	370.873	409.008	497.07	448.675
1722	ENSG00000116984	47.074	1.18169	0.913957	1.29294	0.196033	0.644341	1.37247	40.8758	50.7035	86.8445	55.5736
1723	ENSG00000130559	57.9727	-0.94203	0.728048	-1.29391	0.195696	0.644341	120.777	71.7819	22.9856	39.9942	34.3249
1724	ENSG00000138430	295.639	-0.511434	0.395291	-1.29382	0.195728	0.644341	338.999	437.67	231.208	202.256	268.061
1725	ENSG00000139514	121.225	-0.60071	0.464693	-1.2927	0.196114	0.644341	155.089	149.546	116.28	110.841	74.3705
1726	ENSG00000198795	50.2368	-1.01066	0.780657	-1.29462	0.195451	0.644341	120.777	46.8576	21.6335	25.1392	36.7766
1727	ENSG00000233514	61.2936	-0.994859	0.770227	-1.29164	0.19648	0.645075	98.8177	115.649	15.5491	33.138	43.3147
1728	ENSG00000179348	53.1138	1.21237	0.939153	1.29091	0.196733	0.645531	1.37247	61.8122	40.5628	123.411	38.4111
1729	ENSG00000234297	53.3817	-0.89981	0.697779	-1.28953	0.197213	0.64673	102.935	62.8091	31.0982	42.2795	27.7868
1730	ENSG00000006756	45.1756	0.971927	0.755481	1.2865	0.198268	0.648317	32.9392	11.9636	52.7317	51.4211	76.8223
1731	ENSG00000075539	103.095	-0.636468	0.494285	-1.28765	0.197867	0.648317	157.834	110.664	92.6184	79.9883	74.3705
1732	ENSG00000108861	222.167	0.508461	0.395052	1.28707	0.198069	0.648317	135.874	210.361	223.095	262.819	278.685
1733	ENSG00000151612	189.12	-0.554952	0.431309	-1.28667	0.198209	0.648317	207.243	294.106	149.406	142.836	152.01
1734	ENSG00000215105	34.1673	-1.10262	0.856916	-1.28673	0.198189	0.648317	85.093	23.9273	21.6335	20.5684	19.6142
1735	ENSG00000136950	112.484	-0.76608	0.595777	-1.28585	0.198495	0.648684	177.048	181.449	45.9712	81.131	76.8223
1736	ENSG00000108821	27159.4	-0.460856	0.358731	-1.28469	0.198902	0.649641	40881.7	34217	16386.7	24491.3	19820.1
1737	ENSG00000116133	112.153	0.616674	0.480205	1.28419	0.199075	0.649832	108.425	76.7667	92.6184	109.698	173.259
1738	ENSG00000136875	272.953	0.459754	0.358473	1.28253	0.199655	0.650601	240.182	198.397	273.123	324.524	328.538
1739	ENSG00000140526	188.96	0.60377	0.470592	1.283	0.199492	0.650601	86.4655	143.564	237.969	242.25	234.553
1740	ENSG00000166619	35.1936	-0.946726	0.738076	-1.28269	0.199599	0.650601	43.919	53.8364	33.1263	20.5684	24.5178
1741	ENSG00000067066	113.162	0.654755	0.511457	1.28018	0.200483	0.650712	80.9756	130.603	64.9005	111.984	177.345
1742	ENSG00000108055	309.851	0.440584	0.34407	1.28051	0.200367	0.650712	263.514	304.076	246.081	341.664	393.919
1743	ENSG00000112378	116.99	0.656498	0.512829	1.28015	0.200493	0.650712	111.17	50.8455	123.041	157.691	142.203
1744	ENSG00000132872	41.0038	1.11791	0.872217	1.28169	0.199952	0.650712	63.1335	7.97577	13.5209	58.2772	62.1116
1745	ENSG00000155329	38.3625	0.959537	0.749193	1.28076	0.200278	0.650712	28.8218	13.9576	40.5628	47.993	60.4771
1746	ENSG00000197451	262.669	-0.591837	0.462127	-1.28068	0.200306	0.650712	428.21	339.967	143.322	188.544	213.304
1747	ENSG00000256053	72.6422	0.718407	0.560814	1.28101	0.200191	0.650712	50.7813	42.8697	79.0975	94.8433	95.6192
1748	ENSG00000214063	95.1637	-0.651003	0.50867	-1.27981	0.200611	0.650722	138.619	116.646	79.0975	71.9895	69.467
1749	ENSG00000108010	54.4198	-0.789627	0.617238	-1.27929	0.200795	0.650947	54.8987	82.7486	58.8161	33.138	42.4974
1750	ENSG00000151304	94.38	0.816859	0.638755	1.27883	0.200957	0.6511	21.9595	73.7758	120.336	106.27	149.558
1751	ENSG00000138668	732.914	-0.516223	0.403999	-1.27778	0.201327	0.651926	1114.44	981.019	404.952	595.342	568.812
1752	ENSG00000157216	124.533	0.583932	0.457276	1.27698	0.20161	0.651967	96.0727	131.6	83.8298	165.69	145.472
1753	ENSG00000178449	56.0193	-0.785375	0.615127	-1.27677	0.201684	0.651967	76.8582	74.7728	50.7035	31.9953	45.7665
1754	ENSG00000184898	32.816	1.08258	0.847833	1.27688	0.201643	0.651967	43.919	13.9576	10.8168	53.7065	41.6802
1755	ENSG00000134294	1167.03	-0.425165	0.333285	-1.27568	0.202069	0.652137	1674.41	1357.87	868.044	965.573	969.268
1756	ENSG00000161970	494.024	0.462659	0.362779	1.27532	0.202197	0.652137	292.336	531.385	462.416	682.186	501.797
1757	ENSG00000182827	452.229	0.412983	0.323719	1.27575	0.202045	0.652137	443.307	380.843	373.854	596.484	466.655
1758	ENSG00000210049	662.659	0.531994	0.417069	1.27555	0.202114	0.652137	365.076	490.51	829.51	1096.98	531.218
1759	ENSG00000100968	139.491	0.654754	0.51409	1.27362	0.202799	0.652288	65.8784	100.694	172.392	222.825	135.665
1760	ENSG00000110315	54.1349	0.801238	0.629293	1.27324	0.202934	0.652288	32.9392	55.8304	36.5065	57.1345	88.2639
1761	ENSG00000117362	77.297	0.704213	0.552782	1.27394	0.202684	0.652288	48.0364	50.8455	85.858	91.4152	110.33
1762	ENSG00000143569	350.031	0.443429	0.348243	1.27333	0.2029	0.652288	347.234	332.988	238.645	402.227	429.061
1763	ENSG00000169155	68.1234	0.878325	0.68927	1.27428	0.202563	0.652288	26.0769	29.9091	95.9987	119.982	68.6497
1764	ENSG00000186625	91.5364	0.686911	0.53929	1.27373	0.202758	0.652288	96.0727	75.7698	49.3514	147.407	89.0812
1765	ENSG00000094916	599.246	-0.425283	0.334503	-1.27139	0.20359	0.653287	782.306	735.764	484.726	526.78	466.655
1766	ENSG00000129055	77.2047	0.704037	0.553481	1.27202	0.203367	0.653287	45.2914	56.8273	82.4777	84.5591	116.868
1767	ENSG00000204568	429.531	0.566082	0.445239	1.27141	0.203583	0.653287	196.263	275.164	607.766	523.352	545.111
1768	ENSG00000072135	34.866	1.07221	0.843837	1.27063	0.20386	0.65355	24.7044	6.97879	40.5628	57.1345	44.9492
1769	ENSG00000090273	95.1644	0.805701	0.634317	1.27019	0.204018	0.65355	28.8218	67.794	122.364	81.131	175.711
1770	ENSG00000220130	30.7657	-1.03212	0.812471	-1.27035	0.203959	0.65355	45.2914	49.8485	20.9575	20.5684	17.1624
1771	ENSG00000132466	369.759	0.436155	0.343781	1.2687	0.204548	0.654877	391.153	265.194	316.39	415.939	460.116
1772	ENSG00000060718	35.8238	0.909566	0.717396	1.26787	0.204844	0.655208	31.5668	25.9212	22.3095	44.5649	54.7563
1773	ENSG00000112130	46.0753	0.819624	0.647337	1.26615	0.20546	0.655208	27.4494	36.8879	41.2389	59.4199	65.3807
1774	ENSG00000114126	42.2412	1.0381	0.818941	1.26761	0.204938	0.655208	48.0364	6.97879	34.4784	45.7076	76.005
1775	ENSG00000119280	94.9267	0.728489	0.574914	1.26713	0.20511	0.655208	39.8016	120.633	64.9005	100.557	148.741
1776	ENSG00000121741	46.4995	-0.893848	0.705764	-1.2665	0.205335	0.655208	69.9958	69.7879	31.7742	21.7111	39.2284
1777	ENSG00000134352	221.747	0.491691	0.388243	1.26645	0.205351	0.655208	203.125	144.561	224.448	262.819	273.782
1778	ENSG00000197594	39.3231	-0.954917	0.753995	-1.26648	0.205342	0.655208	39.8016	45.8606	60.1682	37.7088	13.0761
1779	ENSG00000101811	85.0236	-0.652281	0.515337	-1.26574	0.205607	0.655308	107.052	110.664	81.1256	55.9918	70.2842
1780	ENSG00000232573	503.406	-0.420697	0.332612	-1.26483	0.205933	0.655976	647.805	607.155	425.91	425.081	411.081
1781	ENSG00000082068	38.6148	0.963592	0.763833	1.26152	0.207121	0.658775	13.7247	22.9303	46.6472	52.5638	57.2081
1782	ENSG00000102158	134.777	0.564375	0.447414	1.26141	0.20716	0.658775	85.093	113.655	139.942	161.119	174.076
1783	ENSG00000159069	114.803	-0.620902	0.492138	-1.26164	0.207077	0.658775	138.619	89.7274	171.716	97.1287	76.8223
1784	ENSG00000047249	110.419	-0.688946	0.548407	-1.25627	0.209018	0.659377	199.008	126.615	65.5765	79.9883	80.9086
1785	ENSG00000062485	50.5569	-0.831243	0.660231	-1.25902	0.208024	0.659377	72.7408	74.7728	36.5065	37.7088	31.0558
1786	ENSG00000074416	501.171	-0.448793	0.356291	-1.25962	0.207805	0.659377	404.878	536.37	741.623	375.945	447.04
1787	ENSG00000109606	228.513	0.469438	0.372451	1.2604	0.207523	0.659377	219.595	200.391	174.42	300.528	247.629
1788	ENSG00000117174	97.4062	0.919859	0.731688	1.25717	0.208691	0.659377	8.23481	109.667	96.6747	141.694	130.761
1789	ENSG00000136205	41.1957	0.91285	0.726616	1.2563	0.209006	0.659377	24.7044	18.9424	47.3233	47.993	67.0152
1790	ENSG00000141076	118.09	-0.634203	0.504609	-1.25682	0.208819	0.659377	205.87	101.691	106.139	81.131	95.6192
1791	ENSG00000149503	79.7522	0.665554	0.528625	1.25903	0.20802	0.659377	78.2306	52.8394	62.8724	116.554	88.2639
1792	ENSG00000154237	34.1824	0.938429	0.746046	1.25787	0.208438	0.659377	23.3319	21.9334	29.7461	35.4234	60.4771
1793	ENSG00000163781	75.9539	0.670933	0.533668	1.25721	0.208678	0.659377	54.8987	56.8273	72.337	84.5591	111.147
1794	ENSG00000168488	46.0911	-0.863637	0.687576	-1.25606	0.209094	0.659377	35.6842	56.8273	75.7173	37.7088	24.5178
1795	ENSG00000177732	152.052	-0.674454	0.536379	-1.25742	0.208602	0.659377	263.514	172.476	101.407	65.1334	157.731
1796	ENSG00000186566	154.356	0.527587	0.418752	1.2599	0.207704	0.659377	129.012	127.612	136.561	221.682	156.914
1797	ENSG00000204291	62.6161	-0.846456	0.672488	-1.25869	0.208141	0.659377	100.19	98.7001	29.7461	46.8503	37.5939
1798	ENSG00000248092	52.8297	0.839434	0.667859	1.2569	0.208789	0.659377	49.4088	18.9424	52.0556	74.2749	69.467
1799	ENSG00000048405	134.016	-0.582204	0.464377	-1.25373	0.20994	0.659746	145.482	116.646	201.462	87.9872	118.502
1800	ENSG00000065526	167.866	0.532527	0.425518	1.25148	0.21076	0.659746	123.522	134.591	168.336	250.249	162.634
1801	ENSG00000080371	66.2033	-0.744082	0.593022	-1.25473	0.209578	0.659746	94.7003	93.7152	48.6754	45.7076	48.2182
1802	ENSG00000106070	87.2863	-0.709978	0.565833	-1.25475	0.20957	0.659746	118.032	113.655	79.0975	36.5661	89.0812
1803	ENSG00000106609	119.483	-0.621721	0.496006	-1.25345	0.21004	0.659746	167.441	159.515	90.5903	71.9895	107.878
1804	ENSG00000115084	53.7992	0.807364	0.645439	1.25088	0.21098	0.659746	42.5465	23.9273	57.464	67.4187	77.6395
1805	ENSG00000123144	273.051	-0.454524	0.362789	-1.25286	0.210257	0.659746	284.101	334.982	298.813	259.391	187.969
1806	ENSG00000134152	35.3552	1.1564	0.924686	1.25059	0.211084	0.659746	4.1174	16.9485	49.3514	37.7088	68.6497
1807	ENSG00000139428	37.0568	0.97017	0.775011	1.25181	0.210638	0.659746	17.8421	15.9515	45.9712	54.8491	50.67
1808	ENSG00000141551	94.4494	-0.643477	0.513712	-1.2526	0.210351	0.659746	124.895	114.652	91.2663	89.1299	52.3045
1809	ENSG00000153048	56.9475	0.761658	0.608426	1.25185	0.210624	0.659746	32.9392	48.8516	51.3796	90.2725	61.2944
1810	ENSG00000158711	33.9645	-1.01616	0.812828	-1.25016	0.211242	0.659746	59.0161	25.9212	42.591	30.8526	11.4416
1811	ENSG00000163539	35.2592	-1.05725	0.844897	-1.25133	0.210813	0.659746	20.587	76.7667	35.8305	30.8526	12.2589
1812	ENSG00000165119	1141.79	-0.47389	0.377777	-1.25442	0.209689	0.659746	1618.14	1568.23	671.991	916.438	934.126
1813	ENSG00000174938	92.8954	0.679672	0.543744	1.24999	0.211305	0.659746	96.0727	40.8758	87.8861	109.698	129.944
1814	ENSG00000183137	77.7304	-0.660701	0.528305	-1.25061	0.211078	0.659746	108.425	82.7486	82.4777	53.7065	61.2944
1815	ENSG00000237187	38.5242	-1.03423	0.826377	-1.25153	0.210742	0.659746	54.8987	13.9576	76.3933	22.8538	24.5178
1816	ENSG00000243824	39.6275	-1.04098	0.831938	-1.25127	0.210837	0.659746	93.3278	39.8788	16.9012	19.4257	28.604
1817	ENSG00000105397	56.2958	0.749518	0.601208	1.24669	0.212512	0.662552	41.174	35.8909	55.4358	69.7041	79.2741
1818	ENSG00000110321	1194.16	-0.474342	0.380439	-1.24683	0.212461	0.662552	1682.65	1628.05	725.398	804.454	1130.27
1819	ENSG00000116560	751.327	0.444549	0.356918	1.24552	0.21294	0.662552	476.246	553.319	938.353	963.288	825.431
1820	ENSG00000155970	42.8622	0.939331	0.754251	1.24538	0.212991	0.662552	12.3522	30.9061	50.0275	71.9895	49.0355
1821	ENSG00000164924	929.134	-0.38552	0.309307	-1.2464	0.212617	0.662552	1144.64	1105.64	826.805	681.043	887.543
1822	ENSG00000177239	42.8537	1.06647	0.856576	1.24503	0.213119	0.662552	53.5262	5.98182	30.4221	37.7088	86.6294
1823	ENSG00000177733	166.873	-0.591472	0.474645	-1.24613	0.212715	0.662552	258.024	196.403	125.069	91.4152	163.452
1824	ENSG00000205659	78.671	-0.743578	0.59726	-1.24498	0.213138	0.662552	145.482	82.7486	53.4077	65.1334	46.5837
1825	ENSG00000064995	67.0224	-0.698298	0.561365	-1.24393	0.213526	0.663392	90.5829	69.7879	77.0693	55.9918	41.6802
1826	ENSG00000093000	50.3529	0.816436	0.656652	1.24333	0.213746	0.663712	21.9595	41.8728	51.3796	71.9895	64.5634
1827	ENSG00000187720	41.5288	0.842147	0.677855	1.24237	0.2141	0.664449	28.8218	35.8909	29.7461	67.4187	45.7665
1828	ENSG00000008283	115.896	0.553296	0.447682	1.23591	0.216491	0.664725	97.4452	98.7001	96.6747	154.263	132.396
1829	ENSG00000084463	137.014	0.600479	0.485879	1.23586	0.21651	0.664725	153.716	65.8001	121.688	154.263	189.604
1830	ENSG00000100852	94.7244	0.658122	0.531977	1.23712	0.216041	0.664725	85.093	95.7092	50.7035	92.5579	149.558
1831	ENSG00000108854	351.635	0.436116	0.352902	1.2358	0.216534	0.664725	238.809	376.855	308.277	401.084	433.147
1832	ENSG00000117335	42.8606	1.05077	0.849426	1.23703	0.216075	0.664725	24.7044	5.98182	58.8161	59.4199	65.3807
1833	ENSG00000123684	39.811	0.910427	0.736368	1.23638	0.216319	0.664725	26.0769	29.9091	32.4503	29.71	80.9086
1834	ENSG00000124570	125.505	0.637069	0.513075	1.24167	0.214359	0.664725	133.129	77.7637	98.0268	97.1287	221.477
1835	ENSG00000135404	1270.57	-0.376697	0.304407	-1.23748	0.215909	0.664725	1578.34	1564.25	1055.99	1021.57	1132.72
1836	ENSG00000137161	60.708	0.725152	0.585378	1.23878	0.215429	0.664725	35.6842	52.8394	55.4358	86.8445	72.736
1837	ENSG00000141232	62.4021	-0.744619	0.601177	-1.2386	0.215493	0.664725	102.935	57.8243	62.8724	37.7088	50.67
1838	ENSG00000143641	36.4413	0.914771	0.737367	1.24059	0.214757	0.664725	21.9595	19.9394	38.5347	44.5649	57.2081
1839	ENSG00000148411	74.5551	0.653988	0.528561	1.2373	0.215976	0.664725	57.6436	62.8091	61.5203	84.5591	106.244
1840	ENSG00000156603	183.058	0.501832	0.404812	1.23967	0.215099	0.664725	131.757	193.412	145.35	238.822	205.949
1841	ENSG00000158321	98.4953	-0.632952	0.510994	-1.23867	0.215468	0.664725	148.226	117.643	79.0975	67.4187	80.0913
1842	ENSG00000163798	112.143	0.720275	0.582113	1.23735	0.215958	0.664725	31.5668	107.673	127.097	126.839	167.538
1843	ENSG00000164944	164.031	0.497535	0.400967	1.24084	0.214665	0.664725	142.737	151.54	128.449	193.115	204.315
1844	ENSG00000169084	36.4274	-0.901076	0.728138	-1.23751	0.215899	0.664725	35.6842	44.8637	53.4077	28.5673	19.6142
1845	ENSG00000170242	123.749	-0.662038	0.535279	-1.23681	0.216158	0.664725	186.656	178.458	70.9849	73.1322	109.513
1846	ENSG00000172053	129.943	0.600731	0.485522	1.23729	0.215981	0.664725	64.506	111.661	146.026	154.263	173.259
1847	ENSG00000198791	156.103	-0.511749	0.41293	-1.23931	0.21523	0.664725	179.793	192.415	159.547	135.98	112.782
1848	ENSG00000100216	55.3342	0.929074	0.752204	1.23514	0.21678	0.664877	20.587	17.9455	82.4777	84.5591	71.1015
1849	ENSG00000132323	44.0811	-0.95027	0.769625	-1.23472	0.216935	0.664877	90.5829	51.8425	21.6335	34.2807	22.066
1850	ENSG00000138767	82.4599	-0.639384	0.517828	-1.23474	0.216927	0.664877	98.8177	95.7092	93.9705	73.1322	50.67
1851	ENSG00000080839	63.046	0.747957	0.606107	1.23403	0.21719	0.664912	72.7408	31.9031	44.6191	77.7029	88.2639
1852	ENSG00000106355	37.1625	0.91845	0.744441	1.23374	0.217298	0.664912	16.4696	37.8849	27.7179	39.9942	63.7462
1853	ENSG00000124164	83.8898	-0.657683	0.532859	-1.23425	0.217108	0.664912	97.4452	112.658	85.1819	45.7076	78.4568
1854	ENSG00000165861	42.4596	0.869459	0.705055	1.23318	0.217508	0.665196	32.9392	17.9455	44.6191	57.1345	59.6599
1855	ENSG00000109084	59.5095	0.800352	0.649372	1.2325	0.217762	0.665611	23.3319	43.8667	69.6328	93.7006	67.0152
1856	ENSG00000213585	1017.09	0.37599	0.305257	1.23172	0.218054	0.665898	819.363	826.489	1080.32	1012.42	1346.84
1857	ENSG00000224025	98.6453	-0.74386	0.603968	-1.23162	0.218091	0.665898	181.166	127.612	44.6191	66.276	73.5533
1858	ENSG00000163466	2172.76	0.436893	0.354852	1.2312	0.218249	0.666024	1276.39	1587.18	2844.81	2787.02	2368.41
1859	ENSG00000167118	96.2975	-0.617692	0.501848	-1.23083	0.218385	0.66608	138.619	113.655	83.8298	68.5614	76.8223
1860	ENSG00000183741	252.901	0.459764	0.373748	1.23014	0.218643	0.666151	201.753	191.418	265.686	335.951	269.695
1861	ENSG00000214078	130.522	0.621866	0.505477	1.23026	0.218602	0.666151	68.6234	84.7425	167.66	171.404	160.183
1862	ENSG00000071626	282.008	-0.479179	0.390025	-1.22859	0.219227	0.666237	407.623	329.997	217.011	227.395	228.015
1863	ENSG00000089195	34.2047	-1.02821	0.839539	-1.22473	0.220677	0.666237	80.9756	25.9212	22.3095	20.5684	21.2487
1864	ENSG00000100280	272.835	-0.536003	0.437842	-1.22419	0.22088	0.666237	418.603	349.937	166.984	190.829	237.822
1865	ENSG00000101298	53.8745	-0.905395	0.738802	-1.22549	0.220391	0.666237	122.15	42.8697	33.8023	46.8503	23.7005
1866	ENSG00000102181	66.8991	-0.774999	0.632923	-1.22448	0.220773	0.666237	98.8177	100.694	41.2389	59.4199	34.3249
1867	ENSG00000111726	39.1238	-0.900558	0.732753	-1.22901	0.219069	0.666237	56.2712	29.9091	58.14	19.4257	31.8731
1868	ENSG00000112559	46.8414	-0.979872	0.800152	-1.22461	0.220724	0.666237	116.66	32.9	25.6898	37.7088	21.2487
1869	ENSG00000126822	54.2773	-0.963735	0.786907	-1.22471	0.220683	0.666237	122.15	59.8182	20.9575	19.4257	49.0355
1870	ENSG00000130638	184.227	-0.482311	0.392784	-1.22793	0.219474	0.666237	227.83	197.4	198.758	133.695	163.452
1871	ENSG00000133657	307.499	0.524924	0.428924	1.22382	0.221021	0.666237	179.793	194.409	409.008	415.939	338.345
1872	ENSG00000136888	167.669	-0.495846	0.404333	-1.22633	0.220074	0.666237	207.243	176.464	185.913	119.982	148.741
1873	ENSG00000160299	64.5083	0.814702	0.663536	1.22782	0.219515	0.666237	17.8421	60.8152	68.9568	100.557	74.3705
1874	ENSG00000166508	89.6219	-0.630438	0.513177	-1.2285	0.21926	0.666237	115.287	78.7607	118.984	75.4176	59.6599
1875	ENSG00000176978	74.7438	0.788745	0.643342	1.22601	0.220195	0.666237	53.5262	22.9303	96.6747	101.699	98.8883
1876	ENSG00000184226	47.6602	-0.974035	0.795741	-1.22406	0.22093	0.666237	39.8016	20.9364	116.956	26.2819	34.3249
1877	ENSG00000198853	31.7474	-1.01687	0.82714	-1.22938	0.218931	0.666237	67.2509	25.9212	26.3658	22.8538	16.3452
1878	ENSG00000214255	107.275	-0.709622	0.578222	-1.22725	0.219729	0.666237	156.461	172.476	52.7317	63.9907	90.7157
1879	ENSG00000226961	128.362	-0.663073	0.540107	-1.22767	0.219571	0.666237	197.635	188.427	66.2526	85.7018	103.792
1880	ENSG00000237729	31.4068	-1.04999	0.857333	-1.22471	0.220683	0.666237	72.7408	23.9273	22.3095	21.7111	16.3452
1881	ENSG00000242247	83.9588	-0.673495	0.549741	-1.22511	0.220533	0.666237	130.384	102.688	63.5484	53.7065	69.467
1882	ENSG00000166963	1563.25	-0.340133	0.278287	-1.22224	0.221618	0.667679	1970.86	1579.2	1570.46	1347.23	1348.48
1883	ENSG00000184840	469.369	-0.456427	0.373598	-1.22171	0.221819	0.667931	680.744	568.273	331.263	398.799	367.766
1884	ENSG00000099381	29.926	1.23764	1.0136	1.22104	0.222073	0.667985	6.86234	3.98788	46.6472	42.2795	49.8528
1885	ENSG00000162704	134.381	-0.565906	0.46344	-1.2211	0.222049	0.667985	122.15	132.597	208.222	93.7006	115.233
1886	ENSG00000101654	78.4102	0.743582	0.609488	1.22001	0.22246	0.668796	28.8218	63.8061	91.9424	79.9883	127.492
1887	ENSG00000159131	41.214	0.897745	0.736143	1.21952	0.222645	0.668997	16.4696	26.9182	47.9993	46.8503	67.8324
1888	ENSG00000130165	48.1951	0.801787	0.657663	1.21914	0.222789	0.669076	27.4494	47.8546	35.8305	79.9883	49.8528
1889	ENSG00000075415	358.722	-0.481153	0.395444	-1.21674	0.223702	0.669689	499.578	464.588	250.813	246.821	331.807
1890	ENSG00000128228	145.264	-0.561537	0.461359	-1.21714	0.223552	0.669689	160.579	164.5	175.772	74.2749	151.193
1891	ENSG00000156860	80.2339	-0.740599	0.608636	-1.21682	0.223673	0.669689	63.1335	63.8061	159.547	46.8503	67.8324
1892	ENSG00000163660	46.379	-0.873679	0.717558	-1.21757	0.223387	0.669689	24.7044	72.7789	72.337	28.5673	33.5076
1893	ENSG00000166557	44.1101	1.11839	0.918832	1.21719	0.223532	0.669689	1.37247	42.8697	45.2951	58.2772	72.736
1894	ENSG00000172888	61.73	0.984567	0.808535	1.21772	0.223331	0.669689	9.60727	25.9212	96.6747	62.848	113.599
1895	ENSG00000039068	65.994	-0.709496	0.584481	-1.21389	0.22479	0.669984	60.3886	70.7849	102.759	55.9918	40.0457
1896	ENSG00000088205	162.355	0.619588	0.509495	1.21608	0.223953	0.669984	100.19	94.7122	204.842	278.816	133.213
1897	ENSG00000091656	689.448	-0.495287	0.40803	-1.21385	0.224805	0.669984	1076.01	885.31	379.938	586.2	519.776
1898	ENSG00000111913	37.3007	1.21753	1.0026	1.21438	0.224603	0.669984	12.3522	1.99394	58.14	55.9918	58.0253
1899	ENSG00000125835	128.192	-0.664873	0.547267	-1.2149	0.224405	0.669984	229.202	140.573	82.4777	62.848	125.858
1900	ENSG00000130066	73.4271	-0.696356	0.57306	-1.21515	0.224308	0.669984	59.0161	118.64	82.4777	45.7076	61.2944
1901	ENSG00000130939	75.9417	0.654472	0.539239	1.2137	0.224864	0.669984	54.8987	50.8455	79.0975	101.699	93.1675
1902	ENSG00000134909	54.483	-0.813712	0.670243	-1.21406	0.224727	0.669984	83.7205	81.7516	32.4503	31.9953	42.4974
1903	ENSG00000178950	51.7222	-0.758157	0.623865	-1.21526	0.224267	0.669984	68.6234	47.8546	68.9568	38.8515	34.3249
1904	ENSG00000182752	53.1199	-0.775465	0.639737	-1.21216	0.22545	0.671377	54.8987	89.7274	46.6472	34.2807	40.0457
1905	ENSG00000048649	460.292	0.378118	0.312377	1.21045	0.226105	0.672097	430.955	395.797	406.304	569.06	499.345
1906	ENSG00000104368	33.2165	-1.10294	0.911115	-1.21053	0.226074	0.672097	10.9797	30.9061	84.5059	21.7111	17.9797
1907	ENSG00000127463	41.7219	0.858626	0.709457	1.21026	0.226179	0.672097	34.3117	42.8697	17.5772	58.2772	55.5736
1908	ENSG00000127884	205.101	-0.546757	0.45187	-1.20999	0.226284	0.672097	149.599	202.385	351.544	146.264	175.711
1909	ENSG00000166803	62.5366	0.789032	0.651867	1.21042	0.226118	0.672097	20.587	50.8455	73.0131	91.4152	76.8223
1910	ENSG00000139239	33.8734	-0.983513	0.813243	-1.20937	0.22652	0.672445	71.3683	33.897	21.6335	22.8538	19.6142
1911	ENSG00000115648	146.509	0.599445	0.496203	1.20806	0.227023	0.673497	137.247	62.8091	164.279	162.262	205.949
1912	ENSG00000116750	83.2447	0.635384	0.526054	1.20783	0.227112	0.673497	79.6031	47.8546	77.0693	106.27	105.426
1913	ENSG00000125818	100.809	-0.582802	0.482852	-1.207	0.227433	0.673735	115.287	137.582	95.9987	79.9883	75.1878
1914	ENSG00000144136	359.922	-0.406866	0.337173	-1.2067	0.227549	0.673735	363.704	412.746	421.177	262.819	339.162
1915	ENSG00000161202	92.8982	-0.648126	0.537034	-1.20686	0.227485	0.673735	152.344	105.679	68.2807	71.9895	66.1979
1916	ENSG00000124783	490.837	-0.372309	0.308644	-1.20627	0.227712	0.673866	569.574	552.322	498.247	420.51	413.533
1917	ENSG00000135506	88.8661	0.641903	0.532532	1.20538	0.228057	0.674013	54.8987	99.6971	62.8724	133.695	93.1675
1918	ENSG00000137500	29.9549	1.06975	0.888053	1.2046	0.228356	0.674013	12.3522	8.97274	40.5628	38.8515	49.0355
1919	ENSG00000147133	106.079	0.577073	0.479054	1.20461	0.228354	0.674013	113.915	74.7728	77.7454	134.837	129.127
1920	ENSG00000170312	39.4014	0.857953	0.712114	1.2048	0.228281	0.674013	42.5465	19.9394	27.0419	55.9918	51.4873
1921	ENSG00000175756	96.8596	-0.601091	0.498801	-1.20507	0.228176	0.674013	85.093	113.655	137.238	78.8456	69.467
1922	ENSG00000164104	757.001	-0.455485	0.378437	-1.20359	0.228746	0.674814	1152.87	905.249	489.458	689.042	548.38
1923	ENSG00000112667	46.3427	-0.83743	0.696247	-1.20278	0.229062	0.675394	78.2306	59.8182	31.0982	27.4246	35.1421
1924	ENSG00000117625	84.3502	-0.641798	0.53396	-1.20196	0.22938	0.675627	131.757	91.7213	72.337	66.276	59.6599
1925	ENSG00000168273	37.487	0.85117	0.708043	1.20214	0.229308	0.675627	32.9392	27.9152	24.3377	60.5626	41.6802
1926	ENSG00000173230	481.016	0.382384	0.318459	1.20073	0.229855	0.676677	392.526	403.773	490.134	518.781	599.868
1927	ENSG00000134852	61.4117	0.733781	0.611326	1.20031	0.230019	0.676806	30.1943	45.8606	68.9568	75.4176	86.6294
1928	ENSG00000071994	33.1077	-0.977704	0.816483	-1.19746	0.231128	0.678075	69.9958	30.9061	22.9856	22.8538	18.7969
1929	ENSG00000123159	106.202	-0.58257	0.486203	-1.19821	0.230837	0.678075	146.854	111.661	108.844	98.2714	65.3807
1930	ENSG00000125755	52.1396	0.771252	0.643907	1.19777	0.231007	0.678075	49.4088	23.9273	48.6754	65.1334	73.5533
1931	ENSG00000162244	205.954	-0.458711	0.382684	-1.19867	0.230656	0.678075	229.202	216.343	247.433	189.687	147.107
1932	ENSG00000164366	136.114	-0.565901	0.472953	-1.19653	0.231491	0.678075	183.911	188.427	97.3508	106.27	104.609
1933	ENSG00000167978	1527.17	-0.394363	0.329615	-1.19644	0.231526	0.678075	2224.77	1704.82	1137.79	1287.81	1280.64
1934	ENSG00000170906	39.066	1.09011	0.91091	1.19673	0.231412	0.678075	28.8218	2.99091	48.6754	50.2784	64.5634
1935	ENSG00000173559	78.4452	0.632329	0.527846	1.19794	0.23094	0.678075	80.9756	54.8334	57.464	101.699	97.2537
1936	ENSG00000198742	31.2776	-0.933325	0.77961	-1.19717	0.231241	0.678075	32.9392	51.8425	31.0982	21.7111	18.7969
1937	ENSG00000114446	81.4094	0.636109	0.532764	1.19398	0.232486	0.680535	69.9958	49.8485	79.7735	119.982	87.4466
1938	ENSG00000105778	44.4886	-0.829903	0.695296	-1.1936	0.232636	0.680622	38.4291	45.8606	77.0693	36.5661	24.5178
1939	ENSG00000118515	112.889	-0.659472	0.553038	-1.19245	0.233084	0.681229	220.967	73.7758	102.759	81.131	85.8121
1940	ENSG00000164961	61.0396	-0.716575	0.600818	-1.19267	0.233	0.681229	72.7408	93.7152	50.7035	47.993	40.0457
1941	ENSG00000173933	31.5568	-0.91726	0.769506	-1.19201	0.233257	0.681383	30.1943	45.8606	40.5628	18.283	22.8832
1942	ENSG00000087095	77.1623	-0.754436	0.633516	-1.19087	0.233704	0.681785	102.935	129.606	44.6191	34.2807	74.3705
1943	ENSG00000162733	304.853	0.462997	0.388831	1.19074	0.233755	0.681785	181.166	256.221	355.601	383.944	347.335
1944	ENSG00000167987	47.4398	-0.820691	0.689077	-1.191	0.233653	0.681785	79.6031	61.8122	31.0982	31.9953	32.6903
1945	ENSG00000171456	185.585	-0.551541	0.463417	-1.19016	0.233983	0.6821	218.222	298.094	121.688	159.977	129.944
1946	ENSG00000105197	101.301	0.60811	0.5122	1.18725	0.235128	0.682979	59.0161	78.7607	112.9	106.27	149.558
1947	ENSG00000117226	70.1235	0.851515	0.716211	1.18892	0.234472	0.682979	10.9797	77.7637	69.6328	109.698	82.5431
1948	ENSG00000127616	758.399	-0.36684	0.308744	-1.18817	0.234767	0.682979	915.436	665.976	918.072	684.472	608.04
1949	ENSG00000144824	236.61	-0.548777	0.462006	-1.18781	0.234907	0.682979	382.918	293.109	137.238	207.97	161.817
1950	ENSG00000162642	29.963	1.09765	0.923973	1.18797	0.234844	0.682979	31.5668	3.98788	26.3658	33.138	54.7563
1951	ENSG00000163597	36.8635	0.872799	0.734487	1.18831	0.234711	0.682979	31.5668	34.894	16.9012	44.5649	56.3908
1952	ENSG00000204569	228.614	0.488669	0.411509	1.18751	0.235028	0.682979	178.421	151.54	260.278	225.11	327.721
1953	ENSG00000136108	88.1369	-0.599885	0.505748	-1.18614	0.235569	0.683909	109.797	114.652	81.8017	67.4187	67.0152
1954	ENSG00000008838	82.6511	-0.7167	0.605239	-1.18416	0.23635	0.685124	87.8379	48.8516	156.843	67.4187	52.3045
1955	ENSG00000145725	81.8955	0.603638	0.509669	1.18437	0.236265	0.685124	59.0161	69.7879	74.3652	101.699	104.609
1956	ENSG00000186812	73.1367	0.929691	0.78479	1.18464	0.236161	0.685124	5.48987	64.8031	89.9142	113.126	92.3502
1957	ENSG00000163961	84.9293	0.616842	0.521723	1.18232	0.23708	0.68514	57.6436	61.8122	89.9142	118.84	96.4365
1958	ENSG00000165655	71.4734	-0.672746	0.568555	-1.18326	0.236708	0.68514	100.19	96.7062	55.4358	50.2784	54.7563
1959	ENSG00000172661	29.9899	0.98447	0.832582	1.18243	0.237035	0.68514	13.7247	13.9576	36.5065	39.9942	45.7665
1960	ENSG00000176407	182.759	-0.465928	0.393696	-1.18347	0.236622	0.68514	183.911	229.303	202.814	158.834	138.934
1961	ENSG00000185088	1876.86	-0.333627	0.282019	-1.183	0.236811	0.68514	1821.26	1940.1	2374.95	1765.46	1482.51
1962	ENSG00000288701	35.7659	0.891631	0.753767	1.1829	0.236848	0.68514	16.4696	38.8819	24.3377	58.2772	40.8629
1963	ENSG00000064313	162.012	-0.511543	0.433087	-1.18116	0.237541	0.686122	201.753	192.415	157.519	161.119	97.2537
1964	ENSG00000116337	43.0152	-0.895399	0.758775	-1.18006	0.237977	0.687031	72.7408	29.9091	55.4358	42.2795	14.7107
1965	ENSG00000095794	36.6803	-0.920703	0.78153	-1.17808	0.238766	0.687819	24.7044	71.7819	39.2107	18.283	29.4213
1966	ENSG00000101367	32.9017	-0.914117	0.77569	-1.17846	0.238615	0.687819	31.5668	35.8909	54.0838	15.9977	26.9695
1967	ENSG00000135999	89.6988	-0.600545	0.509395	-1.17894	0.238423	0.687819	105.68	115.649	90.5903	54.8491	81.7258
1968	ENSG00000156639	37.6133	-0.875173	0.742911	-1.17803	0.238784	0.687819	45.2914	59.8182	33.1263	17.1404	32.6903
1969	ENSG00000196459	33.9166	-0.92276	0.783427	-1.17785	0.238856	0.687819	34.3117	64.8031	26.3658	22.8538	21.2487
1970	ENSG00000135111	205.404	-0.479601	0.407726	-1.17628	0.239482	0.68892	175.676	234.288	284.616	142.836	189.604
1971	ENSG00000148154	153.196	0.503347	0.427846	1.17647	0.239408	0.68892	107.052	165.497	121.012	194.257	178.162
1972	ENSG00000172985	83.0305	-0.72393	0.615712	-1.17576	0.23969	0.68917	166.069	46.8576	83.1538	65.1334	53.9391
1973	ENSG00000185009	37.843	-0.847543	0.721266	-1.17508	0.239964	0.689608	61.761	33.897	42.591	23.9965	26.9695
1974	ENSG00000141837	287.054	-0.433877	0.369985	-1.17269	0.240921	0.691657	400.761	277.158	283.94	210.255	263.157
1975	ENSG00000204628	1088.67	-0.443563	0.378225	-1.17275	0.240896	0.691657	1600.3	1406.73	646.977	836.449	952.923
1976	ENSG00000057657	33.0532	-0.879476	0.750593	-1.17171	0.241314	0.692085	38.4291	34.894	47.9993	19.4257	24.5178
1977	ENSG00000174917	60.0825	-0.729495	0.62258	-1.17173	0.241306	0.692085	56.2712	106.676	51.3796	41.1369	44.9492
1978	ENSG00000090060	231.12	-0.457663	0.3916	-1.1687	0.242524	0.693417	318.412	268.185	191.997	187.401	189.604
1979	ENSG00000101421	165.507	-0.616163	0.527344	-1.16843	0.242635	0.693417	306.06	182.446	89.2382	99.4141	150.376
1980	ENSG00000104447	170.902	-0.509027	0.435425	-1.16903	0.24239	0.693417	256.651	143.564	181.857	153.121	119.32
1981	ENSG00000109118	43.4383	-1.06119	0.907913	-1.16882	0.242475	0.693417	129.012	14.9546	20.9575	28.5673	23.7005
1982	ENSG00000135387	255.476	-0.466021	0.398423	-1.16966	0.242136	0.693417	377.429	286.131	198.758	209.112	205.949
1983	ENSG00000142599	112.391	0.758117	0.648069	1.16981	0.242077	0.693417	19.2145	110.664	133.181	171.404	127.492
1984	ENSG00000189339	49.0995	0.746141	0.638352	1.16885	0.242462	0.693417	45.2914	36.8879	33.8023	78.8456	50.67
1985	ENSG00000197894	63.302	0.789406	0.675808	1.16809	0.24277	0.693453	17.8421	47.8546	80.4496	90.2725	80.0913
1986	ENSG00000040275	182.268	-0.595746	0.510656	-1.16663	0.24336	0.694534	91.9553	294.106	246.081	110.841	168.355
1987	ENSG00000164332	64.9312	0.723948	0.62059	1.16655	0.243393	0.694534	24.7044	60.8152	68.2807	89.1299	81.7258
1988	ENSG00000125995	237.388	-0.568626	0.488032	-1.16514	0.243962	0.695107	443.307	219.334	157.519	131.409	235.37
1989	ENSG00000133265	55.2209	-0.761183	0.653026	-1.16562	0.243767	0.695107	37.0566	64.8031	95.9987	36.5661	41.6802
1990	ENSG00000143321	361.072	0.397961	0.341531	1.16523	0.243927	0.695107	351.352	346.946	263.658	387.372	456.03
1991	ENSG00000106477	70.6081	-0.653257	0.561108	-1.16423	0.244332	0.695115	64.506	101.691	81.8017	44.5649	60.4771
1992	ENSG00000125834	103.177	-0.678562	0.582819	-1.16428	0.244312	0.695115	102.935	203.382	58.14	69.7041	81.7258
1993	ENSG00000198231	221.953	0.432371	0.371352	1.16431	0.244297	0.695115	219.595	191.418	173.744	253.677	271.33
1994	ENSG00000064961	29.7857	0.986354	0.84871	1.16218	0.245162	0.695481	24.7044	23.9273	15.5491	65.1334	19.6142
1995	ENSG00000104164	159.576	0.573819	0.493908	1.16179	0.24532	0.695481	157.834	64.8031	177.8	181.688	215.756
1996	ENSG00000152990	65.4098	-0.810159	0.697051	-1.16227	0.245127	0.695481	94.7003	99.6971	43.267	18.283	71.1015
1997	ENSG00000166478	32.8439	-1.0347	0.890422	-1.16203	0.245223	0.695481	13.7247	81.7516	28.394	18.283	22.066
1998	ENSG00000170558	495.772	-0.364036	0.313234	-1.16218	0.245161	0.695481	521.538	561.294	549.626	469.646	376.756
1999	ENSG00000179010	126.197	0.510472	0.439161	1.16238	0.24508	0.695481	100.19	100.694	122.364	162.262	145.472
[truncated: 60,704 more rows]

## Sheet: EtOH 0.75%_6h
	gene	baseMean	log2FoldChange	lfcSE	stat	pvalue	padj	aK34	aK35	aK36	nK22	nK23
1	ENSG00000264229	2044.19	1.65318	0.29351	5.63245	1.77665e-08	0.000288546	937.733	1234.57	1127.26	3352.61	3568.79
2	ENSG00000108518	125.952	3.28117	0.598564	5.48173	4.21181e-08	0.00034202	27.5378	12.6731	43.1926	183.753	362.605
3	ENSG00000101940	142.523	-2.5129	0.508646	-4.94036	7.7979e-07	0.00316614	213.055	167.918	257.031	48.5885	26.0243
4	ENSG00000111678	179.561	-3.00783	0.603211	-4.98637	6.15249e-07	0.00316614	473.939	214.386	140.907	50.3554	18.217
5	ENSG00000105258	512.949	-2.24433	0.461105	-4.86729	1.13141e-06	0.00367504	1208.76	532.268	507.69	206.722	109.302
6	ENSG00000159403	178.77	2.20247	0.465666	4.72972	2.24829e-06	0.00608575	44.93	90.8235	82.8448	356.021	319.231
7	ENSG00000177600	2103.31	-1.38396	0.306578	-4.51423	6.35472e-06	0.0147438	3274.09	2842.99	2260.18	1159.06	980.247
8	ENSG00000117410	225.899	-1.93333	0.433405	-4.4608	8.16548e-06	0.0150444	378.282	294.648	288.895	61.8399	105.832
9	ENSG00000230074	26.4607	5.50074	1.23436	4.45635	8.33688e-06	0.0150444	0	0	3.54037	68.9073	59.8558
10	ENSG00000239809	214.956	-2.86688	0.6551	-4.37625	1.2074e-05	0.0196094	508.724	314.714	161.441	78.625	11.2772
11	ENSG00000147274	398.904	-1.6592	0.391693	-4.23596	2.27576e-05	0.0336005	626.122	469.959	550.882	223.507	124.049
12	ENSG00000116132	1467.06	-1.22519	0.298822	-4.10006	4.1305e-05	0.0559029	2049.39	1662.28	1996.06	875.476	752.101
13	ENSG00000167792	202.166	-1.84138	0.457208	-4.02744	5.63874e-05	0.0704452	389.877	248.181	214.547	67.1405	91.0849
14	ENSG00000120802	320.132	1.61484	0.408187	3.95612	7.61779e-05	0.0883718	133.341	246.068	146.572	569.811	504.871
15	ENSG00000164953	11.7199	7.27681	1.85286	3.92733	8.5893e-05	0.0929992	0	0	0	26.5028	32.0966
16	ENSG00000104884	134.156	-2.17901	0.559305	-3.89593	9.78242e-05	0.0980442	191.315	285.144	108.335	53.8891	32.0966
17	ENSG00000183696	93.5557	-2.27383	0.585391	-3.8843	0.000102626	0.0980442	117.398	152.077	141.615	16.7851	39.9039
18	ENSG00000228196	13.0556	7.43226	1.92248	3.86598	0.000110643	0.0998305	0	0	0	60.0731	5.20485
19	ENSG00000134255	22.3284	-6.38967	1.7762	-3.59737	0.000321446	0.274769	66.6704	26.4022	17.7019	0	0.867475
20	ENSG00000142544	12.0438	-6.96419	1.95899	-3.55498	0.000378009	0.306962	20.291	13.7291	26.1988	0	0
21	ENSG00000076706	32.5028	2.99015	0.854063	3.50109	0.000463361	0.318796	7.24678	8.4487	9.91305	87.4593	49.4461
22	ENSG00000115239	57.286	-2.30155	0.656095	-3.50795	0.000451573	0.318796	75.3665	83.4309	93.4659	18.552	15.6146
23	ENSG00000146410	11.7672	6.28748	1.79813	3.49667	0.000471098	0.318796	0	1.05609	0	29.1531	28.6267
24	ENSG00000276168	143.657	-2.0976	0.594723	-3.52701	0.000420274	0.318796	189.866	297.817	133.826	75.0913	21.6869
25	ENSG00000233762	2175.77	-1.47149	0.422689	-3.48125	0.000499084	0.324225	3898.77	3134.47	1737.62	1491.23	616.775
26	ENSG00000161888	35.1945	2.78138	0.809748	3.43487	0.000592846	0.352225	10.1455	8.4487	12.7453	83.0422	61.5907
27	ENSG00000171552	283.568	-1.3996	0.408242	-3.42836	0.000607248	0.352225	443.503	420.323	268.36	158.133	127.519
28	ENSG00000185432	13.9397	5.19637	1.51009	3.44109	0.000579379	0.352225	0	1.05609	1.41615	23.8525	43.3738
29	ENSG00000130312	218.559	-2.0876	0.612137	-3.41035	0.000648795	0.363348	494.23	265.078	185.516	123.68	24.2893
30	ENSG00000100075	248.663	-1.4295	0.433224	-3.29967	0.000967983	0.515431	310.162	379.135	307.305	163.434	83.2776
31	ENSG00000116649	344.399	-1.17954	0.358938	-3.28618	0.00101556	0.515431	426.111	481.576	422.721	212.023	179.567
32	ENSG00000162065	44.501	-2.42617	0.73774	-3.28865	0.00100669	0.515431	78.2652	53.8605	65.851	13.2514	11.2772
33	ENSG00000178209	220.285	-1.30199	0.397761	-3.27329	0.00106303	0.52317	279.726	275.639	311.553	112.195	122.314
34	ENSG00000213228	16.0572	-5.91848	1.81763	-3.25615	0.00112934	0.539459	27.5378	28.5144	23.3665	0	0.867475
35	ENSG00000152382	17.3218	-5.01283	1.54502	-3.2445	0.00117655	0.54305	36.2339	38.0192	10.6211	0	1.73495
36	ENSG00000213398	18.6651	-4.08933	1.26292	-3.23799	0.00120373	0.54305	46.3794	17.9535	25.4907	1.76685	1.73495
37	ENSG00000115233	194.9	-1.3545	0.42109	-3.21664	0.00129702	0.569322	294.219	215.442	263.404	106.011	95.4223
38	ENSG00000090674	29.7904	-3.25917	1.0165	-3.20628	0.00134465	0.574697	49.2781	53.8605	36.1118	8.83427	0.867475
39	ENSG00000203783	9.30179	-6.59374	2.07803	-3.17306	0.00150839	0.612444	10.1455	17.9535	18.4099	0	0
40	ENSG00000275023	86.474	1.75726	0.553059	3.17735	0.00148629	0.612444	34.7845	42.2435	55.2298	142.232	157.88
41	ENSG00000106333	148.785	-1.59457	0.503791	-3.16514	0.00155007	0.614016	250.739	208.049	150.82	88.3427	45.9762
42	ENSG00000125398	31.9869	-3.00008	0.961472	-3.1203	0.0018067	0.628054	66.6704	20.0657	60.8944	8.83427	3.4699
43	ENSG00000126860	7.52729	6.63802	2.12914	3.1177	0.00182271	0.628054	0	0	0	18.552	19.0845
44	ENSG00000148300	58.9917	-2.08317	0.666241	-3.12676	0.00176746	0.628054	60.8729	85.5431	108.335	16.7851	23.4218
45	ENSG00000160789	666.394	-1.13628	0.365091	-3.11232	0.0018562	0.628054	1136.29	775.168	645.764	437.296	337.448
46	ENSG00000214063	82.8562	-1.93213	0.616281	-3.13515	0.00171766	0.628054	146.385	123.562	82.8448	42.4045	19.0845
47	ENSG00000277287	7.54005	6.6404	2.13104	3.11604	0.001833	0.628054	0	0	0	22.0857	15.6146
48	ENSG00000277791	43.7969	2.69995	0.859115	3.14271	0.00167393	0.628054	4.34807	9.50479	26.1988	60.9565	117.977
49	ENSG00000173898	9.01836	-6.53878	2.10657	-3.104	0.00190922	0.63281	23.1897	8.4487	13.4534	0	0
50	ENSG00000071246	7.36655	6.6068	2.149	3.07436	0.00210953	0.646431	0	0	0	22.0857	14.7471
51	ENSG00000142546	119.454	-1.5283	0.494846	-3.08844	0.0020121	0.646431	140.587	185.871	158.609	64.4902	47.7111
52	ENSG00000188321	7.3506	6.60376	2.14655	3.07646	0.00209476	0.646431	0	0	0	17.6685	19.0845
53	ENSG00000233730	41.9707	-2.70854	0.880895	-3.07476	0.0021067	0.646431	118.847	32.7387	38.9441	13.2514	6.07233
54	ENSG00000087266	79.3465	1.95714	0.64174	3.04974	0.00229036	0.687174	26.0884	21.1218	62.3106	148.416	138.796
55	ENSG00000139173	15.4699	-4.83885	1.59214	-3.03922	0.00237193	0.687174	18.8416	45.4118	11.3292	1.76685	0
56	ENSG00000270959	9.28492	-6.58369	2.16982	-3.0342	0.00241173	0.687174	10.1455	32.7387	3.54037	0	0
57	ENSG00000272086	10.242	-6.71701	2.21336	-3.03475	0.00240733	0.687174	30.4365	20.0657	0.708075	0	0
58	ENSG00000155729	7.14839	6.56365	2.19013	2.99692	0.00272726	0.76368	0	0	0	9.7177	26.0243
59	ENSG00000232362	36.9231	2.42899	0.812641	2.98901	0.00279886	0.770445	17.3923	14.7852	8.4969	92.7599	51.181
60	ENSG00000025770	167.408	-1.56391	0.530219	-2.94955	0.0031824	0.833635	333.352	209.105	140.907	103.361	50.3136
61	ENSG00000071462	156.997	1.5019	0.508544	2.95334	0.00314359	0.833635	65.221	129.899	76.4721	183.753	329.641
62	ENSG00000104611	76.3184	1.82093	0.61643	2.95399	0.00313697	0.833635	20.291	51.7483	41.0683	120.146	148.338
63	ENSG00000067167	147.071	1.3369	0.456291	2.92993	0.00339036	0.847121	72.4678	98.2161	102.671	219.973	242.026
64	ENSG00000169696	39.2646	-2.34423	0.79809	-2.9373	0.00331089	0.847121	57.9742	43.2996	72.2236	15.0183	7.80728
65	ENSG00000172500	330.829	-1.21275	0.413531	-2.93267	0.00336065	0.847121	430.459	542.829	311.553	227.041	142.266
66	ENSG00000119917	28.5793	2.54334	0.870664	2.92114	0.00348749	0.858186	10.1455	8.4487	10.6211	50.3554	63.3257
67	ENSG00000279345	12.4951	4.82732	1.65752	2.91238	0.0035868	0.869452	0	3.16826	0	17.6685	41.6388
68	ENSG00000099999	6.64067	6.45727	2.22743	2.89898	0.00374376	0.881195	0	0	0	13.2514	19.9519
69	ENSG00000182809	88.2666	-1.90958	0.658674	-2.89913	0.00374196	0.881195	126.094	51.7483	196.845	39.7542	26.8917
70	ENSG00000104969	74.1872	-2.36106	0.818632	-2.88415	0.00392468	0.89772	68.1197	28.5144	231.541	14.1348	28.6267
71	ENSG00000140988	212.565	1.2162	0.422328	2.87976	0.00397979	0.89772	146.385	154.189	116.832	385.174	260.243
72	ENSG00000171298	7.74825	-6.32267	2.1906	-2.88628	0.00389825	0.89772	11.5948	20.0657	7.08075	0	0
73	ENSG00000072210	15.1186	3.87071	1.34791	2.87163	0.00408361	0.907512	4.34807	0	2.8323	41.5211	26.8917
74	ENSG00000157259	266.125	1.28116	0.448079	2.85923	0.00424672	0.907512	100.006	164.75	241.454	449.664	374.749
75	ENSG00000159069	103.52	-1.54578	0.540073	-2.86216	0.00420758	0.907512	146.385	95.0479	179.851	49.4719	46.8437
76	ENSG00000248008	8.57945	-6.45629	2.25301	-2.86563	0.00416181	0.907512	34.7845	5.28044	2.8323	0	0
77	ENSG00000196199	222.176	1.15414	0.404255	2.85497	0.00430406	0.907822	153.632	127.787	165.69	296.832	366.942
78	ENSG00000031081	58.7479	-2.00173	0.705844	-2.83594	0.00456915	0.932383	40.582	109.833	101.255	23.8525	18.217
79	ENSG00000182752	46.4865	-2.13744	0.754136	-2.83429	0.00459274	0.932383	57.9742	95.0479	48.8572	10.6011	19.9519
80	ENSG00000196453	19.658	-3.32514	1.17279	-2.83525	0.00457894	0.932383	15.9429	48.58	27.6149	4.41714	1.73495
81	ENSG00000131037	8.41609	-6.43604	2.28067	-2.822	0.00477255	0.945713	28.9871	1.05609	12.0373	0	0
82	ENSG00000146250	7.28337	-6.23175	2.2084	-2.82184	0.00477486	0.945713	15.9429	10.5609	9.91305	0	0
83	ENSG00000042753	525.67	-0.958085	0.342649	-2.79611	0.00517214	0.977145	705.836	577.68	673.379	386.058	285.399
84	ENSG00000196639	72.0481	1.78119	0.637053	2.79598	0.00517422	0.977145	30.4365	27.4583	50.9814	84.809	166.555
85	ENSG00000214367	8.14472	5.77219	2.0601	2.80189	0.00508035	0.977145	0	0	0.708075	6.18399	33.8315
86	ENSG00000253954	30.6262	-2.7179	0.971069	-2.79887	0.0051281	0.977145	60.8729	63.3653	14.8696	7.95084	6.07233
87	ENSG00000213970	87.739	-1.86387	0.667768	-2.7912	0.00525129	0.9803	194.214	104.553	72.2236	50.3554	17.3495
88	ENSG00000144810	924.465	-1.1505	0.412851	-2.78672	0.00532443	0.98266	1684.15	1196.55	674.795	663.454	403.376
89	ENSG00000063587	54.5371	-1.86841	0.68041	-2.74601	0.00603258	0.994103	97.1068	52.8044	80.7205	22.9691	19.0845
90	ENSG00000073756	9.12573	-6.57496	2.39077	-2.75014	0.00595695	0.994103	0	7.39261	38.236	0	0
91	ENSG00000077264	14.0944	-4.68812	1.71359	-2.73585	0.00622195	0.994103	50.7274	13.7291	4.24845	1.76685	0
92	ENSG00000103254	7.30993	-6.22947	2.25353	-2.76431	0.00570435	0.994103	21.7403	10.5609	4.24845	0	0
93	ENSG00000115461	123.696	1.50301	0.541768	2.77427	0.00553253	0.994103	82.6133	91.8796	40.3603	158.133	245.495
94	ENSG00000164929	9.18133	-6.56433	2.39693	-2.73864	0.00616936	0.994103	17.3923	28.5144	0	0	0
95	ENSG00000177181	6.91002	-6.15487	2.25795	-2.72587	0.00641329	0.994103	13.0442	15.8413	5.6646	0	0
96	ENSG00000185860	7.02488	-6.17527	2.25766	-2.73525	0.00623333	0.994103	20.291	6.33653	8.4969	0	0
97	ENSG00000189180	11.2364	-5.39897	1.97413	-2.73486	0.00624071	0.994103	11.5948	31.6826	12.0373	0	0.867475
98	ENSG00000197586	5.95307	6.29951	2.31161	2.72516	0.00642699	0.994103	0	0	0	15.0183	14.7471
99	ENSG00000198551	6.92148	-6.15806	2.23954	-2.74969	0.00596512	0.994103	14.4936	11.617	8.4969	0	0
100	ENSG00000213465	98.1201	1.73408	0.629088	2.75649	0.00584246	0.994103	47.8287	23.2339	80.7205	219.973	118.844
101	ENSG00000213626	49.5662	2.24657	0.822124	2.73264	0.00628281	0.994103	7.24678	13.7291	37.528	60.0731	129.254
102	ENSG00000218739	102.426	1.5332	0.554468	2.76517	0.00568938	0.994103	33.3352	65.4774	75.0559	189.053	149.206
103	ENSG00000266261	6.76659	-6.12926	2.24799	-2.72655	0.0064	0.994103	11.5948	11.617	10.6211	0	0
104	ENSG00000287454	8.69366	-6.50332	2.38166	-2.73058	0.0063223	0.994103	0	13.7291	29.7391	0	0
105	ENSG00000290769	8.90071	-6.50945	2.38306	-2.73155	0.00630368	0.994103	42.0313	1.05609	1.41615	0	0
106	ENSG00000000003	8.80864	-1.838	1.76579	-1.04089	0.297925	0.999883	0	17.9535	19.118	1.76685	5.20485
107	ENSG00000000419	22.0025	-0.398458	1.10271	-0.361345	0.717841	0.999883	43.4807	4.22435	25.4907	21.2023	15.6146
108	ENSG00000000457	5.79443	0.982174	1.7739	0.553681	0.579797	0.999883	1.44936	5.28044	5.6646	5.30056	11.2772
109	ENSG00000000460	1.84099	-4.26939	4.30388	-0.991986	0.321204	0.999883	0	0	9.20497	0	0
110	ENSG00000000971	10.5419	0.698284	1.39973	0.498871	0.61787	0.999883	14.4936	3.16826	7.78882	20.3188	6.9398
111	ENSG00000001036	31.9629	0.33996	0.929464	0.365759	0.714545	0.999883	10.1455	20.0657	55.9379	44.1714	29.4942
112	ENSG00000001084	31.5567	-0.304196	0.940205	-0.323542	0.746284	0.999883	15.9429	58.0848	28.323	43.2879	12.1447
113	ENSG00000001167	14.3707	-0.776633	1.2036	-0.645261	0.518758	0.999883	15.9429	9.50479	26.1988	14.1348	6.07233
114	ENSG00000001460	2.97494	5.29874	3.02084	1.75406	0.0794198	0.999883	0	0	0	7.06742	7.80728
115	ENSG00000001461	125.606	0.240699	0.500433	0.480981	0.63053	0.999883	94.2081	143.628	113.292	106.011	170.893
116	ENSG00000001497	12.7228	3.33283	1.44162	2.31187	0.0207849	0.999883	0	2.11218	5.6646	17.6685	38.1689
117	ENSG00000001617	114.892	0.0221798	0.638779	0.0347223	0.972301	0.999883	189.866	100.328	53.1056	166.968	64.1932
118	ENSG00000001629	62.5922	-0.342679	0.687076	-0.498749	0.617956	0.999883	95.6575	29.5705	80.0125	56.5393	51.181
119	ENSG00000001631	31.6733	0.878404	0.883473	0.994262	0.320095	0.999883	26.0884	9.50479	35.4037	34.4537	52.916
120	ENSG00000002016	11.4853	3.01629	1.67667	1.79898	0.0720225	0.999883	0	0	8.4969	19.4354	29.4942
121	ENSG00000002330	13.036	-0.152313	1.48052	-0.102878	0.91806	0.999883	0	22.1778	18.4099	16.7851	7.80728
122	ENSG00000002549	49.0322	-1.17662	0.713323	-1.64949	0.0990483	0.999883	36.2339	72.87	80.0125	29.1531	26.8917
123	ENSG00000002586	126.576	0.285546	0.465597	0.61329	0.539685	0.999883	117.398	125.674	106.211	140.465	143.133
124	ENSG00000002587	2.03441	-2.82993	3.47581	-0.814179	0.415543	0.999883	4.34807	0	4.95652	0	0.867475
125	ENSG00000002745	1.13292	-3.57732	4.45087	-0.803734	0.42155	0.999883	0	0	5.6646	0	0
126	ENSG00000002746	18.105	-2.80922	1.5689	-1.79057	0.0733622	0.999883	36.2339	46.4679	0	0.883427	6.9398
127	ENSG00000002834	53.6219	0.479238	0.659284	0.726906	0.467283	0.999883	43.4807	42.2435	53.1056	49.4719	79.8077
128	ENSG00000002933	6.48553	0.552591	1.99253	0.277331	0.781526	0.999883	14.4936	2.11218	0	11.4846	4.33738
129	ENSG00000003056	34.3136	0.406727	0.776957	0.523487	0.600635	0.999883	26.0884	35.907	29.0311	40.6377	39.9039
130	ENSG00000003096	2.8737	3.11715	2.85551	1.09163	0.274997	0.999883	0	2.11218	0	6.18399	6.07233
131	ENSG00000003137	3.89108	0.289233	2.89931	0.0997591	0.920536	0.999883	0	0	10.6211	8.83427	0
132	ENSG00000003147	2.05034	3.56165	3.3176	1.07356	0.283019	0.999883	1.44936	0	0	7.06742	1.73495
133	ENSG00000003249	3.32326	2.3797	2.67526	0.889519	0.373724	0.999883	0	0	3.54037	3.53371	9.54223
134	ENSG00000003393	48.9568	-0.153326	0.814229	-0.188308	0.850635	0.999883	82.6133	21.1218	49.5652	22.0857	69.398
135	ENSG00000003400	4.24869	-0.982337	2.87456	-0.341734	0.732551	0.999883	15.9429	0	0	5.30056	0
136	ENSG00000003402	73.5348	-0.262428	0.687485	-0.381722	0.702667	0.999883	62.3223	41.1874	132.41	42.4045	89.35
137	ENSG00000003436	90.1081	0.510625	0.601599	0.848779	0.396005	0.999883	42.0313	97.1601	91.3417	77.7416	142.266
138	ENSG00000003509	15.4284	-0.537438	3.29136	-0.163288	0.870292	0.999883	0	44.3557	8.4969	0	24.2893
139	ENSG00000003756	105.453	0.578499	0.500746	1.15527	0.247979	0.999883	92.7588	86.5992	84.969	149.299	113.639
140	ENSG00000003987	2.66382	0.365903	3.34604	0.109354	0.912922	0.999883	7.24678	0	0	0	6.07233
141	ENSG00000004142	42.211	0.345154	0.786925	0.438611	0.660943	0.999883	15.9429	41.1874	56.646	54.7725	42.5063
142	ENSG00000004399	12.2429	0.828943	1.26999	0.652714	0.51394	0.999883	5.79742	15.8413	6.37267	13.2514	19.9519
143	ENSG00000004455	97.7301	-0.476613	0.518514	-0.919191	0.357996	0.999883	111.6	116.17	102.671	66.257	91.9524
144	ENSG00000004478	11.8408	0.692072	1.24667	0.555138	0.5788	0.999883	10.1455	8.4487	9.91305	18.552	12.1447
145	ENSG00000004487	41.455	-0.757883	0.815305	-0.92957	0.352594	0.999883	68.1197	51.7483	29.0311	14.1348	44.2412
146	ENSG00000004534	83.051	0.375838	0.622946	0.603324	0.546293	0.999883	76.8158	44.3557	101.255	61.8399	130.989
147	ENSG00000004660	0.986485	-3.35691	4.45797	-0.753014	0.451441	0.999883	0	4.22435	0.708075	0	0
148	ENSG00000004700	16.0381	0.0132362	1.13037	0.0117096	0.990657	0.999883	7.24678	24.29	16.2857	15.0183	17.3495
149	ENSG00000004766	3.52997	1.36408	2.9783	0.458007	0.646948	0.999883	0	0	6.37267	0	11.2772
150	ENSG00000004777	2.97813	5.30024	3.01967	1.75524	0.0792186	0.999883	0	0	0	7.95084	6.9398
151	ENSG00000004779	66.0221	0.094268	0.786669	0.119832	0.904616	0.999883	36.2339	24.29	131.702	93.6433	44.2412
152	ENSG00000004799	1.33932	-3.79846	4.38742	-0.865761	0.386621	0.999883	0	5.28044	1.41615	0	0
153	ENSG00000004864	28.9335	0.177498	0.87776	0.202217	0.839747	0.999883	36.2339	13.7291	32.5714	30.0365	32.0966
154	ENSG00000004866	6.07878	1.74606	1.95176	0.894605	0.370998	0.999883	2.89871	0	6.37267	16.7851	4.33738
155	ENSG00000004897	183.303	-0.0972135	0.440692	-0.220593	0.825409	0.999883	184.068	163.694	216.671	137.815	214.266
156	ENSG00000004961	3.56719	-1.97982	2.57757	-0.768095	0.442431	0.999883	0	1.05609	14.1615	0.883427	1.73495
157	ENSG00000004975	58.9261	-0.333507	0.679153	-0.491062	0.623382	0.999883	100.006	54.9166	38.236	46.8216	54.6509
158	ENSG00000005007	75.283	-0.597499	0.590839	-1.01127	0.311886	0.999883	113.05	85.5431	63.0187	64.4902	50.3136
159	ENSG00000005020	132.194	0.266335	0.602571	0.441998	0.658491	0.999883	91.3094	60.197	214.547	190.82	104.097
160	ENSG00000005022	9.73185	1.00543	1.80348	0.557496	0.577189	0.999883	2.89871	17.9535	0	2.65028	25.1568
161	ENSG00000005059	11.8619	0.92076	1.5014	0.613267	0.5397	0.999883	0	19.0096	7.08075	14.1348	19.0845
162	ENSG00000005073	129.484	0.251366	0.483991	0.519361	0.603509	0.999883	115.948	124.618	120.373	107.778	178.7
163	ENSG00000005075	88.9062	-1.07329	0.551945	-1.94457	0.051827	0.999883	121.746	89.7674	126.037	63.6068	43.3738
164	ENSG00000005100	40.5996	0.877527	0.920829	0.952975	0.340603	0.999883	7.24678	29.5705	53.8137	25.6194	86.7475
165	ENSG00000005156	34.6598	-0.512456	0.777738	-0.658906	0.509956	0.999883	36.2339	46.4679	35.4037	30.0365	25.1568
166	ENSG00000005175	63.2813	0.211633	0.665303	0.3181	0.750409	0.999883	28.9871	67.5896	81.4286	74.2079	64.1932
167	ENSG00000005189	4.50349	-0.603235	2.77584	-0.217316	0.827962	0.999883	0	0	15.5776	0	6.9398
168	ENSG00000005194	30.5037	-1.08292	1.05879	-1.02279	0.306405	0.999883	49.2781	24.29	42.4845	1.76685	34.699
169	ENSG00000005206	36.7177	-1.62932	0.987042	-1.65071	0.098797	0.999883	37.6832	103.497	9.91305	22.0857	10.4097
170	ENSG00000005238	154.742	0.327005	0.484582	0.674818	0.499792	0.999883	113.05	198.544	109.752	201.421	150.941
171	ENSG00000005243	92.9489	-0.412557	0.624582	-0.660533	0.508912	0.999883	163.777	87.6553	58.7702	103.361	51.181
172	ENSG00000005249	105.788	0.623486	0.551256	1.13103	0.258044	0.999883	57.9742	71.814	130.286	141.348	127.519
173	ENSG00000005302	73.6716	0.414037	0.743441	0.556919	0.577583	0.999883	14.4936	70.7579	109.044	79.5084	94.5548
174	ENSG00000005339	333.546	0.379223	0.436403	0.868974	0.384861	0.999883	407.269	311.546	175.603	454.082	319.231
175	ENSG00000005436	16.5448	0.372373	1.34956	0.275921	0.782609	0.999883	0	20.0657	24.0745	22.9691	15.6146
176	ENSG00000005448	42.2393	0.378587	0.748984	0.505468	0.61323	0.999883	37.6832	24.29	50.9814	60.0731	38.1689
177	ENSG00000005469	83.571	-0.128495	0.673061	-0.190911	0.848595	0.999883	31.8858	100.328	126.745	104.244	54.6509
178	ENSG00000005471	6.40774	-4.57767	2.768	-1.65378	0.0981713	0.999883	0	0	31.1553	0.883427	0
179	ENSG00000005483	1004.06	-0.441799	0.345112	-1.28016	0.200488	0.999883	1363.84	1235.62	768.969	827.771	824.101
180	ENSG00000005486	16.8926	-1.35897	1.20005	-1.13243	0.257456	0.999883	27.5378	19.0096	20.5342	1.76685	15.6146
181	ENSG00000005700	114.406	-0.371875	0.487883	-0.762222	0.445928	0.999883	121.746	144.684	111.168	102.478	91.9524
182	ENSG00000005801	13.8436	0.222564	1.51227	0.147173	0.882996	0.999883	1.44936	1.05609	36.1118	13.2514	17.3495
183	ENSG00000005810	181.074	0.580253	0.429243	1.3518	0.176438	0.999883	168.125	164.75	121.081	210.256	241.158
184	ENSG00000005812	10.3736	-0.632803	1.40837	-0.449316	0.653203	0.999883	7.24678	12.6731	16.2857	2.65028	13.0121
185	ENSG00000005884	199.848	-0.39614	0.424219	-0.93381	0.350402	0.999883	201.46	275.639	186.224	155.483	180.435
186	ENSG00000005889	46.3773	0.00764019	0.755914	0.0101072	0.991936	0.999883	23.1897	42.2435	72.9317	38.8708	54.6509
187	ENSG00000005893	149.794	-0.123994	0.455757	-0.272062	0.785574	0.999883	176.821	141.516	146.572	166.084	117.977
188	ENSG00000006007	92.3057	0.212799	0.530038	0.401479	0.688068	0.999883	69.5691	103.497	87.0932	102.478	98.8922
189	ENSG00000006015	121.966	-1.35723	0.591258	-2.29549	0.021705	0.999883	204.359	130.955	148.696	98.0604	27.7592
190	ENSG00000006016	2.99747	-1.64262	2.87627	-0.571092	0.567937	0.999883	0	9.50479	2.8323	2.65028	0
191	ENSG00000006025	48.7576	-0.688098	0.82799	-0.831047	0.405947	0.999883	63.7716	91.8796	16.9938	48.5885	22.5544
192	ENSG00000006042	311.86	-0.18588	0.439173	-0.423251	0.672112	0.999883	388.427	394.977	200.385	356.905	218.604
193	ENSG00000006047	47.1601	0.0693656	0.852921	0.0813271	0.935182	0.999883	95.6575	29.5705	14.1615	54.7725	41.6388
194	ENSG00000006062	3.99894	-2.13385	2.96563	-0.719526	0.471817	0.999883	17.3923	0	0	0	2.60243
195	ENSG00000006071	2.0291	-4.37433	4.18104	-1.04623	0.295454	0.999883	10.1455	0	0	0	0
196	ENSG00000006125	314.621	0.142716	0.397594	0.358949	0.719633	0.999883	355.092	331.611	220.211	382.524	283.664
197	ENSG00000006194	9.87515	-2.02988	1.69382	-1.1984	0.23076	0.999883	0	16.8974	25.4907	2.65028	4.33738
198	ENSG00000006282	31.8871	-1.50283	0.955375	-1.57302	0.115714	0.999883	11.5948	44.3557	72.9317	10.6011	19.9519
199	ENSG00000006283	2.73717	-4.81344	3.36262	-1.43146	0.152299	0.999883	10.1455	0	3.54037	0	0
200	ENSG00000006327	21.7778	1.20317	1.02014	1.17941	0.238234	0.999883	7.24678	12.6731	22.6584	21.2023	45.1087
201	ENSG00000006377	20.2781	-0.37356	1.31523	-0.284026	0.77639	0.999883	13.0442	45.4118	8.4969	33.5702	0.867475
202	ENSG00000006432	1.44399	-2.26207	4.35729	-0.519147	0.603658	0.999883	0	6.33653	0	0.883427	0
203	ENSG00000006451	424.701	-0.0457273	0.355629	-0.128581	0.897689	0.999883	339.149	468.903	481.491	401.959	432.003
204	ENSG00000006453	5.39347	-5.80561	2.41555	-2.40343	0.0162422	0.999883	5.79742	12.6731	8.4969	0	0
205	ENSG00000006468	32.5601	0.273489	0.83649	0.326949	0.743707	0.999883	21.7403	28.5144	39.6522	49.4719	23.4218
206	ENSG00000006530	8.21931	-0.233563	1.69172	-0.138063	0.890191	0.999883	8.69613	16.8974	0.708075	2.65028	12.1447
207	ENSG00000006534	120.588	0.41203	0.518598	0.794507	0.4269	0.999883	75.3665	93.9918	149.404	124.563	159.615
208	ENSG00000006576	170.122	-0.334406	0.478847	-0.698356	0.484954	0.999883	202.91	155.245	198.261	198.771	95.4223
209	ENSG00000006606	4.39722	-2.3044	2.51603	-0.915886	0.359727	0.999883	11.5948	0	7.78882	0	2.60243
210	ENSG00000006607	26.7322	-0.335276	0.93438	-0.358822	0.719728	0.999883	34.7845	15.8413	36.8199	13.2514	32.9641
211	ENSG00000006625	6.63113	-0.0170768	1.64868	-0.0103578	0.991736	0.999883	7.24678	4.22435	8.4969	9.7177	3.4699
212	ENSG00000006634	107.776	0.139895	0.512511	0.27296	0.784884	0.999883	107.252	117.226	86.3851	136.931	91.0849
213	ENSG00000006638	3.17308	-5.0435	3.17863	-1.58669	0.112583	0.999883	0	11.617	4.24845	0	0
214	ENSG00000006652	23.2219	0.38892	0.924291	0.420777	0.673918	0.999883	15.9429	21.1218	24.7826	26.5028	27.7592
215	ENSG00000006695	6.49244	0.0206874	2.20046	0.00940143	0.992499	0.999883	14.4936	0	4.95652	0	13.0121
216	ENSG00000006704	20.1891	-1.75794	1.07783	-1.631	0.10289	0.999883	14.4936	50.6922	19.118	8.83427	7.80728
217	ENSG00000006715	109.168	-0.334166	0.630731	-0.529807	0.596246	0.999883	73.9171	68.6457	213.839	66.257	123.181
218	ENSG00000006744	67.147	-0.138342	0.673741	-0.205334	0.837311	0.999883	62.3223	88.7114	58.0621	95.4101	31.2291
219	ENSG00000006747	5.24845	2.36774	2.04869	1.15573	0.24779	0.999883	2.89871	3.16826	0	12.368	7.80728
220	ENSG00000006756	50.5688	1.1249	0.784692	1.43356	0.151698	0.999883	34.7845	12.6731	55.2298	100.711	49.4461
221	ENSG00000006757	6.52562	-2.09691	1.72291	-1.21708	0.223576	0.999883	14.4936	7.39261	6.37267	1.76685	2.60243
222	ENSG00000006831	94.325	0.332844	0.55039	0.604742	0.54535	0.999883	114.499	66.5335	75.764	127.214	87.615
223	ENSG00000007047	51.1324	0.108146	0.823869	0.131266	0.895565	0.999883	65.221	10.5609	72.9317	61.8399	45.1087
224	ENSG00000007080	44.6754	-0.301457	0.769047	-0.391987	0.695068	0.999883	37.6832	65.4774	41.7764	20.3188	58.1208
225	ENSG00000007168	530.353	-0.259249	0.426405	-0.607988	0.543196	0.999883	797.146	614.643	292.435	494.719	452.822
226	ENSG00000007202	53.6199	1.01865	0.681477	1.49476	0.134977	0.999883	26.0884	55.9726	31.8634	83.0422	71.133
227	ENSG00000007237	1.26731	-3.71402	4.44697	-0.835179	0.403617	0.999883	0	6.33653	0	0	0
228	ENSG00000007255	12.7015	-0.267266	1.23361	-0.216653	0.828479	0.999883	7.24678	17.9535	15.5776	9.7177	13.0121
229	ENSG00000007341	15.107	1.12762	1.39265	0.809691	0.418118	0.999883	18.8416	0	12.0373	22.9691	21.6869
230	ENSG00000007372	1.04097	3.78418	4.36823	0.866296	0.386328	0.999883	0	0	0	0	5.20485
231	ENSG00000007376	13.698	-0.102997	1.47663	-0.0697513	0.944392	0.999883	21.7403	0	20.5342	10.6011	15.6146
232	ENSG00000007384	159.395	-0.0498024	0.49684	-0.100238	0.920155	0.999883	205.808	160.525	118.957	206.722	104.965
233	ENSG00000007392	177.7	-0.0126927	0.578016	-0.021959	0.982481	0.999883	82.6133	314.714	137.367	233.225	120.579
234	ENSG00000007520	1.20173	2.85978	4.36594	0.655022	0.512454	0.999883	0	0	0.708075	5.30056	0
235	ENSG00000007541	9.55664	-1.08835	1.41212	-0.770721	0.440872	0.999883	13.0442	8.4487	14.8696	7.95084	3.4699
236	ENSG00000007545	16.6324	-1.51978	1.12554	-1.35026	0.176933	0.999883	11.5948	25.3461	30.4472	8.83427	6.9398
237	ENSG00000007866	65.7857	0.853916	0.839974	1.0166	0.309345	0.999883	15.9429	19.0096	113.292	61.8399	118.844
238	ENSG00000007923	15.1086	-0.0328581	1.32618	-0.0247764	0.980233	0.999883	15.9429	28.5144	1.41615	9.7177	19.9519
239	ENSG00000007944	9.6081	-3.07661	1.54523	-1.99103	0.0464773	0.999883	17.3923	20.0657	7.08075	1.76685	1.73495
240	ENSG00000008018	91.2655	0.599724	0.670023	0.89508	0.370744	0.999883	46.3794	53.8605	126.037	57.4228	172.628
241	ENSG00000008083	201.948	0.114265	0.49237	0.232071	0.816483	0.999883	304.365	115.114	167.814	239.409	183.037
242	ENSG00000008086	14.1626	-0.258928	1.19509	-0.21666	0.828473	0.999883	14.4936	21.1218	9.91305	7.06742	18.217
243	ENSG00000008118	4.70507	-0.683658	2.40198	-0.284622	0.775933	0.999883	0	9.50479	7.08075	0	6.9398
244	ENSG00000008130	13.864	-0.710226	1.48719	-0.477562	0.632962	0.999883	0	20.0657	29.0311	15.0183	5.20485
245	ENSG00000008256	121.832	-0.357383	0.534805	-0.66825	0.503974	0.999883	95.6575	181.647	123.205	73.3245	135.326
246	ENSG00000008277	1.04097	3.78418	4.36823	0.866296	0.386328	0.999883	0	0	0	0	5.20485
247	ENSG00000008282	118.235	-0.458035	0.603622	-0.758812	0.447965	0.999883	147.834	199.601	50.9814	106.011	86.7475
248	ENSG00000008283	124.765	0.614794	0.465381	1.32106	0.186483	0.999883	102.904	104.553	101.255	156.367	158.748
249	ENSG00000008294	273.496	0.804215	0.426978	1.8835	0.0596323	0.999883	149.284	197.488	283.938	303.899	432.87
250	ENSG00000008300	3.51351	-0.325599	2.68962	-0.121058	0.903645	0.999883	7.24678	0	4.24845	0	6.07233
251	ENSG00000008311	15.6856	-0.799917	1.19021	-0.672079	0.501534	0.999883	14.4936	7.39261	34.6957	8.83427	13.0121
252	ENSG00000008324	8.32212	-0.281911	1.67352	-0.168454	0.866226	0.999883	1.44936	19.0096	6.37267	1.76685	13.0121
253	ENSG00000008382	13.4673	-1.23676	1.2703	-0.973597	0.330257	0.999883	24.639	11.617	16.2857	2.65028	12.1447
254	ENSG00000008394	127.997	0.0646485	0.489634	0.132034	0.894957	0.999883	117.398	97.1601	162.149	120.146	143.133
255	ENSG00000008405	56.8307	0.264387	0.660435	0.400322	0.688919	0.999883	55.0755	69.7018	33.2795	65.3736	60.7233
256	ENSG00000008441	1240.18	0.086994	0.365102	0.238273	0.811669	0.999883	1660.96	1154.3	816.41	1477.09	1092.15
257	ENSG00000008513	137.504	0.351469	0.799169	0.439793	0.660087	0.999883	18.8416	48.58	303.056	166.968	150.073
258	ENSG00000008710	5.04176	0.845835	2.6569	0.318354	0.750216	0.999883	0	0	11.3292	0	13.8796
259	ENSG00000008838	78.5807	-1.29607	0.648498	-1.99857	0.045655	0.999883	92.7588	51.7483	164.273	46.8216	37.3014
260	ENSG00000008853	15.6686	2.06828	1.62406	1.27352	0.202834	0.999883	0	1.05609	19.118	2.65028	55.5184
261	ENSG00000008869	12.4083	0.812059	1.53998	0.527317	0.597974	0.999883	23.1897	0	5.6646	12.368	20.8194
262	ENSG00000008952	467.365	-0.062996	0.338513	-0.186096	0.852369	0.999883	515.971	493.193	417.764	427.579	482.316
263	ENSG00000008988	1067.73	-0.385251	0.354016	-1.08823	0.276492	0.999883	776.855	1235.62	1520.94	913.464	891.765
264	ENSG00000009307	727.256	0.192618	0.316313	0.608947	0.54256	0.999883	698.589	701.242	664.174	695.257	877.017
265	ENSG00000009335	276.876	-0.0543754	0.430344	-0.126353	0.899452	0.999883	175.372	291.48	375.28	292.414	249.833
266	ENSG00000009413	164.182	0.760004	0.462493	1.64327	0.100326	0.999883	102.904	132.011	150.112	166.968	268.917
267	ENSG00000009694	1.92121	4.66795	3.62802	1.28664	0.198221	0.999883	0	0	0	3.53371	6.07233
268	ENSG00000009780	44.8559	0.143597	0.950882	0.151015	0.879964	0.999883	102.904	8.4487	18.4099	45.9382	48.5786
269	ENSG00000009830	53.3856	-1.48113	0.735957	-2.01252	0.0441651	0.999883	52.1768	108.777	54.5218	15.0183	36.434
270	ENSG00000009844	19.3259	-0.981484	1.17935	-0.832222	0.405284	0.999883	2.89871	35.907	33.2795	14.1348	10.4097
271	ENSG00000009954	518.566	0.206306	0.335485	0.614949	0.538588	0.999883	424.661	481.576	558.671	539.774	588.148
272	ENSG00000010017	6.62261	-1.06105	2.04308	-0.519339	0.603524	0.999883	18.8416	6.33653	0	7.06742	0.867475
273	ENSG00000010072	31.449	-1.50248	0.921858	-1.62984	0.103136	0.999883	43.4807	65.4774	18.4099	21.2023	8.67475
274	ENSG00000010165	47.8925	0.21426	0.711823	0.301002	0.763413	0.999883	65.221	39.0752	31.1553	43.2879	60.7233
275	ENSG00000010219	6.36917	-0.248215	1.7599	-0.141039	0.887839	0.999883	13.0442	1.05609	6.37267	5.30056	6.07233
276	ENSG00000010244	370.58	-0.156572	0.387065	-0.404511	0.685837	0.999883	465.243	428.772	266.236	358.671	333.978
277	ENSG00000010256	230.376	0.394854	0.418353	0.943831	0.345256	0.999883	260.884	183.759	169.938	306.549	230.748
278	ENSG00000010270	9.28382	-0.285519	1.78778	-0.159706	0.873112	0.999883	7.24678	0	22.6584	1.76685	14.7471
279	ENSG00000010278	9.4559	0.0386896	1.52525	0.025366	0.979763	0.999883	1.44936	13.7291	12.7453	15.0183	4.33738
280	ENSG00000010292	44.9982	0.397485	0.730306	0.544272	0.586255	0.999883	57.9742	27.4583	34.6957	42.4045	62.4582
281	ENSG00000010295	20.7671	-0.338125	0.973333	-0.347389	0.728299	0.999883	23.1897	24.29	20.5342	14.1348	21.6869
282	ENSG00000010322	72.8273	-0.193681	0.594276	-0.32591	0.744492	0.999883	75.3665	100.328	54.5218	66.257	67.6631
283	ENSG00000010404	8.08946	-0.475408	1.66271	-0.285924	0.774936	0.999883	1.44936	11.617	14.1615	11.4846	1.73495
284	ENSG00000010438	68.5278	-1.04266	0.632737	-1.64786	0.0993823	0.999883	92.7588	59.1409	106.919	30.0365	53.7835
285	ENSG00000010539	11.1702	1.02367	1.56758	0.653028	0.513738	0.999883	5.79742	0	17.7019	14.1348	18.217
286	ENSG00000010626	6.72571	1.25409	2.13842	0.586457	0.557568	0.999883	0	0	12.7453	3.53371	17.3495
287	ENSG00000010671	2.32339	-4.58833	3.96972	-1.15583	0.24775	0.999883	0	11.617	0	0	0
288	ENSG00000010704	9.88454	1.02465	1.56553	0.654511	0.512783	0.999883	17.3923	1.05609	2.8323	21.2023	6.9398
289	ENSG00000010803	7.6968	-0.0690354	1.54541	-0.0446712	0.964369	0.999883	8.69613	6.33653	8.4969	11.4846	3.4699
290	ENSG00000010810	35.8901	-0.725972	0.869903	-0.834543	0.403975	0.999883	63.7716	25.3461	38.9441	11.4846	39.9039
291	ENSG00000010818	34.6143	0.138436	0.815363	0.169784	0.86518	0.999883	18.8416	47.5239	33.2795	30.92	42.5063
292	ENSG00000011007	96.539	0.624485	0.573602	1.08871	0.276282	0.999883	108.702	67.5896	62.3106	162.551	81.5427
293	ENSG00000011009	155.578	0.571555	0.449953	1.27025	0.203994	0.999883	118.847	123.562	147.988	225.274	162.218
294	ENSG00000011028	246.482	-0.150086	0.455191	-0.329721	0.741611	0.999883	205.808	181.647	381.652	196.121	267.182
295	ENSG00000011105	195.575	-0.377349	0.568623	-0.663619	0.506934	0.999883	314.51	252.405	80.0125	216.44	114.507
296	ENSG00000011114	236.346	0.355505	0.449953	0.790095	0.429472	0.999883	126.094	232.339	278.273	302.132	242.893
297	ENSG00000011132	1.97941	-0.838565	3.76569	-0.222686	0.82378	0.999883	7.24678	0	0	2.65028	0
298	ENSG00000011143	1.7509	4.53393	3.76959	1.20277	0.229067	0.999883	0	0	0	4.41714	4.33738
299	ENSG00000011198	69.4765	-0.321387	0.667835	-0.481237	0.630348	0.999883	100.006	31.6826	94.882	60.9565	59.8558
300	ENSG00000011201	7.27549	-6.24074	2.5072	-2.48912	0.0128058	0.999883	11.5948	0	24.7826	0	0
301	ENSG00000011243	34.5634	-0.409833	0.77388	-0.529582	0.596402	0.999883	40.582	34.8509	39.6522	26.5028	31.2291
302	ENSG00000011258	11.5023	0.249571	1.35197	0.184598	0.853545	0.999883	18.8416	6.33653	7.08075	5.30056	19.9519
303	ENSG00000011260	53.8142	0.978923	0.822797	1.18975	0.234145	0.999883	46.3794	7.39261	62.3106	65.3736	87.615
304	ENSG00000011275	162.896	0.517659	0.478787	1.08119	0.279613	0.999883	84.0626	164.75	167.106	213.789	184.772
305	ENSG00000011295	48.4651	-0.722087	0.69249	-1.04274	0.297068	0.999883	43.4807	55.9726	72.9317	30.0365	39.9039
306	ENSG00000011304	441.9	-0.12773	0.360426	-0.354385	0.72305	0.999883	455.098	355.902	560.795	416.978	420.725
307	ENSG00000011332	27.2271	-1.84604	1.17047	-1.57717	0.114756	0.999883	92.7588	11.617	10.6211	17.6685	3.4699
308	ENSG00000011347	1.651	-0.556398	3.59623	-0.154717	0.877044	0.999883	0	2.11218	3.54037	0	2.60243
309	ENSG00000011376	14.1501	-1.14009	1.35714	-0.840072	0.400868	0.999883	8.69613	20.0657	25.4907	0.883427	15.6146
310	ENSG00000011405	170.89	-0.960392	0.425998	-2.25445	0.0241679	0.999883	201.46	223.891	211.006	115.729	102.362
311	ENSG00000011422	43.0356	1.37526	0.952183	1.44433	0.148647	0.999883	4.34807	12.6731	60.8944	59.1896	78.0728
312	ENSG00000011426	133.694	0.581053	0.516265	1.12549	0.26038	0.999883	152.182	118.282	65.1429	178.452	154.411
313	ENSG00000011451	126.611	-0.979605	0.541656	-1.80854	0.0705231	0.999883	192.764	194.32	86.3851	94.5267	65.0606
314	ENSG00000011454	134.679	-0.244438	0.480571	-0.508641	0.611004	0.999883	175.372	105.609	150.112	111.312	130.989
315	ENSG00000011465	384.474	0.843363	0.449049	1.87811	0.0603664	0.999883	395.674	325.275	155.776	643.135	402.509
316	ENSG00000011485	10.2156	0.640527	1.87916	0.340859	0.73321	0.999883	0	0	24.7826	15.0183	11.2772
317	ENSG00000011523	21.3071	-0.183509	1.08806	-0.168658	0.866066	0.999883	39.1326	14.7852	13.4534	7.06742	32.0966
318	ENSG00000011566	31.9868	0.862565	0.798832	1.07978	0.280239	0.999883	26.0884	22.1778	24.0745	46.8216	40.7713
319	ENSG00000011590	1.05609	-3.45106	4.4548	-0.774684	0.438527	0.999883	0	5.28044	0	0	0
320	ENSG00000011638	8.77014	0.891262	1.65362	0.538977	0.589903	0.999883	0	9.50479	9.91305	7.95084	16.482
321	ENSG00000011677	5.9212	0.972299	2.2632	0.429612	0.667478	0.999883	13.0442	0	0	4.41714	12.1447
322	ENSG00000012048	90.9255	0.739884	0.601263	1.23055	0.218492	0.999883	47.8287	51.7483	114.708	98.9438	141.398
323	ENSG00000012061	14.5869	-0.729239	1.16407	-0.626458	0.531014	0.999883	17.3923	14.7852	19.8261	6.18399	14.7471
324	ENSG00000012124	2.0291	-4.37433	4.18104	-1.04623	0.295454	0.999883	10.1455	0	0	0	0
325	ENSG00000012171	33.1699	-0.519565	0.979181	-0.530612	0.595688	0.999883	52.1768	54.9166	6.37267	18.552	33.8315
326	ENSG00000012174	32.0517	-0.0217831	0.861629	-0.0252813	0.979831	0.999883	24.639	38.0192	33.9876	15.9017	47.7111
327	ENSG00000012211	2.5464	0.863521	3.35908	0.25707	0.797124	0.999883	0	0	5.6646	7.06742	0
328	ENSG00000012232	28.2468	0.0316544	0.941958	0.0336049	0.973192	0.999883	11.5948	27.4583	44.6087	17.6685	39.9039
329	ENSG00000012504	2.29423	-4.55561	3.59075	-1.26871	0.204545	0.999883	7.24678	4.22435	0	0	0
330	ENSG00000012660	30.0479	0.0193266	0.857959	0.0225263	0.982028	0.999883	39.1326	33.7948	16.9938	25.6194	34.699
331	ENSG00000012822	18.4547	-0.366358	1.34475	-0.272436	0.785287	0.999883	0	38.0192	22.6584	20.3188	11.2772
332	ENSG00000012963	29.3964	0.437522	0.998717	0.438084	0.661325	0.999883	17.3923	6.33653	53.1056	41.5211	28.6267
333	ENSG00000012983	355.227	-0.172509	0.425874	-0.405072	0.685425	0.999883	426.111	464.679	225.876	394.892	264.58
334	ENSG00000013016	26.2608	0.679127	0.926689	0.732853	0.463648	0.999883	10.1455	21.1218	31.8634	28.2697	39.9039
335	ENSG00000013275	135.32	0.118851	0.489017	0.24304	0.807974	0.999883	91.3094	134.123	166.398	157.25	127.519
336	ENSG00000013288	25.7035	1.67634	0.953982	1.7572	0.0788839	0.999883	18.8416	5.28044	16.9938	36.2205	51.181
337	ENSG00000013293	2.11218	-4.45083	4.10754	-1.08358	0.278552	0.999883	0	10.5609	0	0	0
338	ENSG00000013297	192.994	0.401112	0.446524	0.898298	0.369027	0.999883	210.157	180.591	123.205	188.17	262.845
339	ENSG00000013306	111.046	-0.378676	0.544084	-0.695988	0.486437	0.999883	171.024	82.3748	114	73.3245	114.507
340	ENSG00000013364	133.168	-0.496715	0.523869	-0.948166	0.343045	0.999883	98.5562	158.413	194.721	137.815	76.3378
341	ENSG00000013374	151.783	-0.0928865	0.445521	-0.20849	0.834847	0.999883	157.98	171.086	138.075	160.784	130.989
342	ENSG00000013375	68.8974	-0.57899	0.623991	-0.927883	0.353468	0.999883	50.7274	86.5992	100.547	43.2879	63.3257
343	ENSG00000013392	3.34319	2.44241	2.43474	1.00315	0.315788	0.999883	0	2.11218	1.41615	9.7177	3.4699
344	ENSG00000013441	37.6955	-0.247119	0.797633	-0.309815	0.756702	0.999883	62.3223	25.3461	33.2795	40.6377	26.8917
345	ENSG00000013503	18.8035	0.158933	1.10745	0.143512	0.885885	0.999883	24.639	9.50479	19.8261	7.95084	32.0966
346	ENSG00000013523	4.16808	-0.157716	2.57277	-0.061302	0.951119	0.999883	0	11.617	1.41615	0	7.80728
347	ENSG00000013561	13.9919	-0.719977	1.50927	-0.477035	0.633337	0.999883	0	34.8509	14.8696	15.9017	4.33738
348	ENSG00000013563	5.20981	-3.22478	2.44848	-1.31705	0.187821	0.999883	0	20.0657	4.24845	0	1.73495
349	ENSG00000013573	7.39706	-0.142659	1.78319	-0.080002	0.936236	0.999883	0	11.617	11.3292	8.83427	5.20485
350	ENSG00000013583	18.3337	-0.496182	1.16025	-0.427652	0.668904	0.999883	5.79742	15.8413	40.3603	9.7177	19.9519
351	ENSG00000013588	124.367	0.0436726	0.473868	0.0921619	0.926569	0.999883	139.138	125.674	104.087	123.68	129.254
352	ENSG00000013619	10.3816	-0.497368	1.32031	-0.376705	0.706393	0.999883	13.0442	11.617	10.6211	7.95084	8.67475
353	ENSG00000013810	38.5585	0.688828	0.843707	0.81643	0.414254	0.999883	11.5948	36.9631	43.9006	31.8034	68.5305
354	ENSG00000014123	94.5257	0.0363938	0.627092	0.0580358	0.95372	0.999883	146.385	93.9918	41.0683	114.846	76.3378
355	ENSG00000014138	8.45879	1.03961	1.45472	0.714645	0.474828	0.999883	4.34807	6.33653	7.08075	13.2514	11.2772
356	ENSG00000014164	4.16577	-2.89061	2.61444	-1.10563	0.268885	0.999883	0	4.22435	14.8696	0	1.73495
357	ENSG00000014216	18.8143	1.21782	1.04138	1.16943	0.242231	0.999883	18.8416	10.5609	7.78882	27.3862	29.4942
358	ENSG00000014257	13.0411	-0.874373	1.49323	-0.585557	0.558173	0.999883	0	20.0657	27.6149	9.7177	7.80728
359	ENSG00000014641	61.6882	0.719832	0.630445	1.14178	0.253544	0.999883	33.3352	58.0848	55.2298	72.441	89.35
360	ENSG00000014824	41.8227	-0.364063	0.810618	-0.449118	0.653347	0.999883	15.9429	57.0287	64.4348	31.8034	39.9039
361	ENSG00000014914	3.56902	0.825391	2.75762	0.299313	0.764701	0.999883	7.24678	1.05609	0	0	9.54223
362	ENSG00000014919	57.8643	0.62558	0.656162	0.953394	0.340391	0.999883	28.9871	62.3092	50.9814	72.441	74.6029
363	ENSG00000015133	13.9308	0.504357	1.43583	0.351266	0.725389	0.999883	0	22.1778	13.4534	10.6011	23.4218
364	ENSG00000015153	137.146	-0.33466	0.608605	-0.54988	0.582402	0.999883	197.112	160.525	91.3417	188.17	48.5786
365	ENSG00000015171	342.253	0.144805	0.393352	0.36813	0.712776	0.999883	391.326	314.714	279.69	450.548	274.99
366	ENSG00000015475	13.1511	-1.19897	1.50149	-0.798521	0.424568	0.999883	0	23.2339	27.6149	8.83427	6.07233
367	ENSG00000015479	3.19281	-1.72431	2.8547	-0.604025	0.545827	0.999883	10.1455	3.16826	0	2.65028	0
368	ENSG00000015532	56.0834	0.0784009	0.660564	0.118688	0.905523	0.999883	50.7274	72.87	41.0683	68.9073	46.8437
369	ENSG00000015676	109.674	-0.662195	0.50288	-1.31681	0.187904	0.999883	105.803	151.021	128.87	73.3245	89.35
370	ENSG00000016082	4.27021	0.7465	2.26034	0.33026	0.741204	0.999883	1.44936	0	8.4969	7.06742	4.33738
371	ENSG00000016402	2.43853	3.97444	3.44942	1.1522	0.249238	0.999883	0	0	0.708075	11.4846	0
372	ENSG00000016864	13.6039	0.0765345	1.19933	0.0638144	0.949118	0.999883	20.291	8.4487	11.3292	10.6011	17.3495
373	ENSG00000017260	52.4527	-0.0338589	0.682774	-0.0495902	0.960449	0.999883	40.582	72.87	45.3168	62.7233	40.7713
374	ENSG00000017483	23.8417	-1.2451	1.01032	-1.23238	0.217808	0.999883	37.6832	28.5144	26.9068	4.41714	21.6869
375	ENSG00000017797	177.212	0.620717	0.43641	1.42232	0.154932	0.999883	162.328	128.843	146.572	182.869	265.447
376	ENSG00000018189	61.8038	0.509726	0.738572	0.69015	0.4901	0.999883	39.1326	23.2339	95.5901	54.7725	96.2898
377	ENSG00000018280	2.12422	-4.47547	4.08095	-1.09668	0.272783	0.999883	0	0	10.6211	0	0
378	ENSG00000018408	122.79	0.11346	0.473852	0.239441	0.810763	0.999883	104.354	122.506	129.578	136.931	120.579
379	ENSG00000018510	32.5771	-0.276188	0.791146	-0.349099	0.727015	0.999883	37.6832	34.8509	32.5714	29.1531	28.6267
380	ENSG00000018610	16.3136	0.598823	1.09133	0.54871	0.583205	0.999883	11.5948	14.7852	14.1615	14.1348	26.8917
381	ENSG00000018699	19.8682	-0.0160375	1.25933	-0.012735	0.989839	0.999883	42.0313	1.05609	16.9938	12.368	26.8917
382	ENSG00000019144	30.8035	-0.643349	0.963944	-0.667413	0.504508	0.999883	18.8416	13.7291	75.0559	22.9691	23.4218
383	ENSG00000019485	8.05841	-2.81501	1.76586	-1.59413	0.110907	0.999883	17.3923	7.39261	12.0373	0	3.4699
384	ENSG00000019549	19.1462	-0.0162181	1.15781	-0.0140075	0.988824	0.999883	5.79742	14.7852	36.8199	8.83427	29.4942
385	ENSG00000019582	1.44936	-3.88495	4.44258	-0.874481	0.381856	0.999883	7.24678	0	0	0	0
386	ENSG00000019991	70.2998	-0.290274	0.583387	-0.497568	0.618789	0.999883	65.221	74.9822	87.0932	56.5393	67.6631
387	ENSG00000019995	30.8421	-0.204919	0.910035	-0.225177	0.821842	0.999883	53.6262	31.6826	12.7453	35.3371	20.8194
388	ENSG00000020129	384.061	-0.674095	0.408265	-1.65112	0.0987136	0.999883	414.516	388.64	550.882	373.69	192.58
389	ENSG00000020181	6.49989	-0.119428	2.24432	-0.0532135	0.957562	0.999883	20.291	0	0	3.53371	8.67475
390	ENSG00000020256	20.7286	-0.424689	1.15873	-0.366512	0.713983	0.999883	17.3923	34.8509	16.9938	31.8034	2.60243
391	ENSG00000020426	79.8048	0.0168618	0.670793	0.0251372	0.979946	0.999883	27.5378	122.506	87.8013	86.5759	74.6029
392	ENSG00000020577	97.9497	0.132004	0.590677	0.223479	0.823162	0.999883	121.746	113.001	48.8572	78.625	127.519
393	ENSG00000020633	22.9564	-0.639921	1.01148	-0.632661	0.526955	0.999883	28.9871	35.907	15.5776	26.5028	7.80728
394	ENSG00000020922	41.871	0.276345	0.724352	0.381506	0.702828	0.999883	31.8858	34.8509	48.8572	52.1222	41.6388
395	ENSG00000021355	14.1722	0.595946	1.21473	0.490599	0.62371	0.999883	4.34807	13.7291	16.9938	12.368	23.4218
396	ENSG00000021574	7.27083	-0.265486	1.8333	-0.144814	0.884858	0.999883	0	12.6731	10.6211	2.65028	10.4097
397	ENSG00000021645	2.08194	4.78402	3.96192	1.2075	0.227239	0.999883	0	0	0	0	10.4097
398	ENSG00000021762	47.2443	0.0938515	0.843973	0.111202	0.911456	0.999883	11.5948	38.0192	87.8013	43.2879	55.5184
399	ENSG00000021776	36.4694	0.132218	0.755151	0.175088	0.86101	0.999883	30.4365	38.0192	36.8199	40.6377	36.434
400	ENSG00000021826	5.61664	-2.2064	2.06892	-1.06645	0.286222	0.999883	8.69613	13.7291	2.12422	3.53371	0
401	ENSG00000022267	59.106	-0.0552753	0.668861	-0.082641	0.934137	0.999883	36.2339	87.6553	55.9379	66.257	49.4461
402	ENSG00000022277	202.93	0.892682	0.609579	1.46443	0.143078	0.999883	40.582	130.955	280.398	272.979	289.737
403	ENSG00000022556	1.73923	-4.15149	4.42803	-0.937548	0.348477	0.999883	8.69613	0	0	0	0
404	ENSG00000022567	1.37656	-0.14546	3.90027	-0.0372949	0.97025	0.999883	0	0	4.24845	1.76685	0.867475
405	ENSG00000022840	358.296	0.044605	0.432604	0.103108	0.917877	0.999883	439.155	408.706	214.547	454.082	274.99
406	ENSG00000022976	10.0432	-1.0458	1.65713	-0.631088	0.527983	0.999883	18.8416	0	19.118	6.18399	6.07233
407	ENSG00000023041	41.8728	-0.574557	0.793917	-0.723698	0.469251	0.999883	55.0755	20.0657	69.3913	35.3371	29.4942
408	ENSG00000023171	5.91774	1.45559	1.93156	0.753586	0.451098	0.999883	0	3.16826	7.08075	14.1348	5.20485
409	ENSG00000023191	95.3958	-0.0479939	0.545918	-0.087914	0.929945	0.999883	108.702	90.8235	90.6336	65.3736	121.447
410	ENSG00000023228	63.7855	0.266798	0.63379	0.420957	0.673787	0.999883	66.6704	38.0192	72.2236	82.1587	59.8558
411	ENSG00000023287	261.61	-0.287912	0.379836	-0.757989	0.448457	0.999883	249.289	310.49	286.062	231.458	230.748
412	ENSG00000023318	35.7922	0.27686	0.827742	0.334476	0.73802	0.999883	15.9429	33.7948	48.8572	30.92	49.4461
413	ENSG00000023330	23.4655	-0.45323	1.01192	-0.44789	0.654233	0.999883	37.6832	15.8413	25.4907	7.95084	30.3616
414	ENSG00000023445	30.3771	0.475024	0.887388	0.535306	0.592439	0.999883	24.639	38.0192	16.2857	52.1222	20.8194
415	ENSG00000023516	72.8985	0.702535	0.570991	1.23038	0.218555	0.999883	50.7274	62.3092	61.6025	89.2261	100.627
416	ENSG00000023572	34.8156	0.400743	0.832472	0.481388	0.63024	0.999883	20.291	51.7483	20.5342	45.9382	35.5665
417	ENSG00000023608	60.3594	0.659516	0.633649	1.04082	0.297958	0.999883	52.1768	33.7948	60.8944	76.8582	78.0728
418	ENSG00000023697	2.51133	0.505386	3.38148	0.149457	0.881193	0.999883	0	0	6.37267	6.18399	0
419	ENSG00000023734	148.11	0.210762	0.492649	0.427813	0.668787	0.999883	98.5562	120.394	198.261	179.336	144.001
420	ENSG00000023839	7.17782	1.976	2.15683	0.91616	0.359583	0.999883	0	8.4487	1.41615	0	26.0243
421	ENSG00000023892	4.34807	-5.47671	3.25719	-1.68142	0.0926808	0.999883	21.7403	0	0	0	0
422	ENSG00000023902	91.4696	-0.23388	0.744997	-0.313934	0.753571	0.999883	31.8858	47.5239	211.714	77.7416	88.4825
423	ENSG00000023909	312.005	-0.170855	0.502244	-0.340183	0.733719	0.999883	172.473	241.844	564.336	345.42	235.953
424	ENSG00000024048	134.887	0.421506	0.555481	0.758813	0.447965	0.999883	95.6575	196.432	64.4348	166.968	150.941
425	ENSG00000024422	334.408	0.191497	0.375472	0.510017	0.61004	0.999883	252.188	316.826	379.528	337.469	386.026
426	ENSG00000024526	20.6044	0.905888	1.29517	0.699434	0.484281	0.999883	30.4365	0	15.5776	34.4537	22.5544
427	ENSG00000024862	15.7575	0.502937	1.35978	0.369867	0.711482	0.999883	0	19.0096	21.2422	20.3188	18.217
428	ENSG00000025039	14.0009	1.18283	1.4343	0.824673	0.409557	0.999883	18.8416	0	9.20497	17.6685	24.2893
429	ENSG00000025156	12.8309	0.277049	1.56823	0.176663	0.859773	0.999883	10.1455	19.0096	6.37267	0	28.6267
430	ENSG00000025293	163.241	-0.102454	0.464238	-0.220694	0.825331	0.999883	186.967	181.647	135.242	195.237	117.109
431	ENSG00000025434	14.7195	1.03848	1.25843	0.825223	0.409245	0.999883	1.44936	13.7291	15.5776	18.552	24.2893
432	ENSG00000025708	6.00677	-0.72078	1.87177	-0.38508	0.700178	0.999883	1.44936	2.11218	17.7019	5.30056	3.4699
433	ENSG00000025772	70.6787	-0.257688	0.594235	-0.433647	0.664545	0.999883	65.221	66.5335	94.882	53.8891	72.8679
434	ENSG00000025796	280.189	0.148832	0.389515	0.382095	0.702391	0.999883	204.359	296.761	303.764	294.181	301.881
435	ENSG00000025800	278.751	0.130774	0.385108	0.339577	0.734175	0.999883	263.783	245.012	296.683	247.36	340.918
436	ENSG00000026025	4214.82	-0.0875356	0.28553	-0.306573	0.759169	0.999883	4594.46	4721.77	3633.84	3994.86	4129.18
437	ENSG00000026297	20.712	0.6215	1.02312	0.607458	0.543547	0.999883	14.4936	9.50479	26.9068	33.5702	19.0845
438	ENSG00000026508	896.016	-0.236755	0.345115	-0.686017	0.492702	0.999883	734.823	945.198	1180.36	679.356	940.343
439	ENSG00000026559	9.05824	-0.291851	1.60403	-0.181948	0.855623	0.999883	17.3923	4.22435	7.78882	15.0183	0.867475
440	ENSG00000026652	6.37793	-1.05544	1.99186	-0.529877	0.596197	0.999883	0	4.22435	19.8261	1.76685	6.07233
441	ENSG00000026950	10.8631	-0.271471	1.33372	-0.203544	0.83871	0.999883	14.4936	6.33653	14.1615	13.2514	6.07233
442	ENSG00000027001	4.59378	1.42506	1.96371	0.725697	0.468025	0.999883	1.44936	3.16826	3.54037	3.53371	11.2772
443	ENSG00000027697	4.42616	1.82475	2.39151	0.763013	0.445456	0.999883	0	0	6.37267	7.95084	7.80728
444	ENSG00000027847	58.0577	0.127714	0.771724	0.165492	0.868557	0.999883	62.3223	14.7852	90.6336	60.9565	61.5907
445	ENSG00000028116	49.9151	-0.660681	0.767646	-0.860658	0.389426	0.999883	66.6704	33.7948	75.0559	17.6685	56.3859
446	ENSG00000028137	31.4321	0.381896	0.935648	0.408163	0.683154	0.999883	7.24678	45.4118	31.1553	26.5028	46.8437
447	ENSG00000028203	55.3117	0.978758	0.653162	1.49849	0.134006	0.999883	30.4365	36.9631	51.6895	73.3245	84.1451
448	ENSG00000028277	162.685	-0.851464	0.57374	-1.48406	0.137794	0.999883	97.1068	149.964	346.249	83.0422	137.061
449	ENSG00000028310	398.107	-0.325143	0.372166	-0.87365	0.382309	0.999883	502.926	454.118	342.708	399.309	291.472
450	ENSG00000028528	54.7253	1.13942	0.733124	1.5542	0.120136	0.999883	27.5378	23.2339	59.4783	112.195	51.181
451	ENSG00000028839	6.23101	1.06967	1.97257	0.542271	0.587632	0.999883	1.44936	0	11.3292	8.83427	9.54223
452	ENSG00000029153	29.7568	0.387299	0.835755	0.463412	0.643069	0.999883	28.9871	22.1778	28.323	42.4045	26.8917
453	ENSG00000029363	221.209	0.50949	0.420734	1.21096	0.225912	0.999883	230.448	136.235	201.093	264.145	274.122
454	ENSG00000029364	14.6024	-0.161418	1.22104	-0.132197	0.894829	0.999883	28.9871	6.33653	10.6211	9.7177	17.3495
455	ENSG00000029534	6.76817	2.79094	1.79762	1.55257	0.120525	0.999883	1.44936	3.16826	1.41615	2.65028	25.1568
456	ENSG00000029639	23.2446	0.333286	1.08143	0.30819	0.757938	0.999883	2.89871	33.7948	26.1988	22.9691	30.3616
457	ENSG00000029725	262.474	-0.44013	0.401492	-1.09624	0.272975	0.999883	297.118	286.2	296.683	164.317	268.05
458	ENSG00000029993	132.987	0.346659	0.513731	0.674787	0.499811	0.999883	107.252	174.254	78.5963	163.434	141.398
459	ENSG00000030066	4.92297	-0.491501	2.12812	-0.230955	0.81735	0.999883	2.89871	7.39261	6.37267	7.95084	0
460	ENSG00000030110	11.7949	0.248726	1.3792	0.180341	0.856885	0.999883	4.34807	4.22435	24.0745	16.7851	9.54223
461	ENSG00000030304	5.79849	-0.636421	2.17792	-0.292215	0.770122	0.999883	0	1.05609	19.118	7.95084	0.867475
462	ENSG00000030419	10.184	-0.797645	1.51827	-0.525366	0.599329	0.999883	15.9429	5.28044	15.5776	13.2514	0.867475
463	ENSG00000030582	387.586	-0.165993	0.360592	-0.460334	0.645277	0.999883	423.212	432.996	359.702	303.899	418.123
464	ENSG00000031003	57.9364	0.616109	0.632977	0.973352	0.330379	0.999883	47.8287	58.0848	37.528	75.9747	70.2655
465	ENSG00000031691	16.6148	0.31162	1.27224	0.244938	0.806504	0.999883	20.291	1.05609	24.0745	19.4354	18.217
466	ENSG00000031698	662.968	-0.442425	0.325154	-1.36066	0.17362	0.999883	705.836	651.606	865.976	536.24	555.184
467	ENSG00000031823	71.5163	0.0699691	0.579281	0.120786	0.90386	0.999883	78.2652	74.9822	57.3541	68.9073	78.0728
468	ENSG00000032219	137.209	0.451324	0.462101	0.976678	0.328728	0.999883	102.904	142.572	113.292	157.25	170.025
469	ENSG00000032389	7.78533	0.0635539	1.87377	0.0339178	0.972943	0.999883	17.3923	0	5.6646	14.1348	1.73495
470	ENSG00000032444	31.2805	0.784618	0.832875	0.94206	0.346162	0.999883	18.8416	21.1218	32.5714	32.6868	51.181
471	ENSG00000032742	29.493	1.3889	0.869357	1.59762	0.110128	0.999883	26.0884	11.617	16.2857	36.2205	57.2534
472	ENSG00000033011	7.09944	-0.052545	1.90255	-0.0276182	0.977967	0.999883	4.34807	13.7291	3.54037	0	13.8796
473	ENSG00000033030	32.9604	0.255629	0.86983	0.293884	0.768847	0.999883	42.0313	15.8413	33.9876	52.1222	20.8194
474	ENSG00000033050	55.2552	0.0933406	0.678858	0.137496	0.890638	0.999883	62.3223	67.5896	31.8634	47.7051	66.7956
475	ENSG00000033100	7.33493	2.40828	1.75775	1.37009	0.170658	0.999883	0	2.11218	5.6646	15.0183	13.8796
476	ENSG00000033122	2.43107	1.4846	3.44753	0.430626	0.66674	0.999883	4.34807	0	0	0	7.80728
477	ENSG00000033170	26.6371	0.282904	0.904679	0.312713	0.754499	0.999883	33.3352	12.6731	27.6149	31.8034	27.7592
478	ENSG00000033178	127.171	-0.577132	0.56972	-1.01301	0.311055	0.999883	108.702	82.3748	247.826	98.0604	98.8922
479	ENSG00000033327	51.0758	0.0828253	0.704583	0.117552	0.906422	0.999883	71.0184	44.3557	34.6957	67.1405	38.1689
480	ENSG00000033627	70.5542	-0.794289	0.604682	-1.31356	0.188993	0.999883	81.1639	62.3092	111.168	53.8891	44.2412
481	ENSG00000033800	32.3993	0.170689	0.88286	0.193336	0.846696	0.999883	13.0442	31.6826	47.441	23.8525	45.9762
482	ENSG00000033867	597.487	-0.329943	0.329493	-1.00137	0.31665	0.999883	713.083	680.12	559.379	477.934	556.919
483	ENSG00000034053	3.43752	0.577974	2.75369	0.209891	0.833753	0.999883	0	0	8.4969	0.883427	7.80728
484	ENSG00000034152	103.238	0.403513	0.558858	0.722031	0.470275	0.999883	49.2781	122.506	101.963	119.263	123.181
485	ENSG00000034510	2972.08	0.110867	0.424955	0.260891	0.794177	0.999883	3988.63	3328.79	1324.1	3887.96	2330.91
486	ENSG00000034533	7.54992	1.06404	1.80239	0.590348	0.554957	0.999883	7.24678	0	8.4969	17.6685	4.33738
487	ENSG00000034677	51.6172	0.339087	0.757306	0.447755	0.65433	0.999883	75.3665	23.2339	41.7764	81.2753	36.434
488	ENSG00000034693	13.1474	-1.1798	1.27812	-0.92308	0.355965	0.999883	30.4365	10.5609	9.91305	4.41714	10.4097
489	ENSG00000034713	87.1477	-0.147299	0.61485	-0.239569	0.810664	0.999883	101.455	103.497	67.2671	120.146	43.3738
490	ENSG00000035115	8.70485	3.41781	1.82364	1.87417	0.060907	0.999883	0	0	4.95652	22.0857	16.482
491	ENSG00000035141	59.9694	-0.705734	0.759128	-0.929664	0.352545	0.999883	20.291	80.2627	111.876	37.1039	50.3136
492	ENSG00000035403	531.682	-0.149209	0.327991	-0.454919	0.649168	0.999883	500.028	591.409	568.584	476.167	522.22
493	ENSG00000035499	3.70907	-2.00766	3.03621	-0.66124	0.508459	0.999883	15.9429	0	0	0	2.60243
494	ENSG00000035664	8.33387	0.627436	1.54393	0.406389	0.684457	0.999883	5.79742	12.6731	2.12422	14.1348	6.9398
495	ENSG00000035681	9.33987	0.426052	1.46664	0.290495	0.771438	0.999883	13.0442	3.16826	8.4969	16.7851	5.20485
496	ENSG00000035687	80.5883	0.428794	0.592172	0.724104	0.469002	0.999883	73.9171	63.3653	75.0559	130.747	59.8558
497	ENSG00000035862	1848.47	-0.160842	0.328879	-0.489063	0.624797	0.999883	2265.34	2182.93	1342.51	1772.16	1679.43
498	ENSG00000035928	121.393	0.825695	0.597743	1.38136	0.167169	0.999883	47.8287	99.2722	130.286	92.7599	236.821
499	ENSG00000036054	39.4205	-0.188818	0.743423	-0.253985	0.799507	0.999883	52.1768	36.9631	35.4037	30.92	41.6388
500	ENSG00000036257	40.3011	0.416355	0.811451	0.513099	0.607882	0.999883	13.0442	48.58	44.6087	39.7542	55.5184
501	ENSG00000036530	2.08222	-1.00585	3.01689	-0.333408	0.738826	0.999883	0	2.11218	5.6646	1.76685	0.867475
502	ENSG00000036549	255.287	-0.611785	0.480016	-1.27451	0.202483	0.999883	481.186	175.311	232.957	197.004	189.977
503	ENSG00000036828	3.47845	-5.15386	3.48333	-1.47958	0.138986	0.999883	17.3923	0	0	0	0
504	ENSG00000037042	3.3105	2.39055	3.03716	0.787101	0.431223	0.999883	0	0	3.54037	0	13.0121
505	ENSG00000037241	85.8418	-0.201218	0.603368	-0.33349	0.738764	0.999883	140.587	70.7579	60.8944	93.6433	63.3257
506	ENSG00000037474	14.2573	0.93469	1.35046	0.692125	0.488859	0.999883	24.639	2.11218	4.95652	30.0365	9.54223
507	ENSG00000037637	25.7642	-1.09933	0.896834	-1.22578	0.22028	0.999883	31.8858	33.7948	32.5714	11.4846	19.0845
508	ENSG00000037749	11.3012	-1.55159	1.34527	-1.15337	0.248761	0.999883	18.8416	9.50479	17.7019	2.65028	7.80728
509	ENSG00000037757	4.50072	-1.87488	2.47967	-0.7561	0.449589	0.999883	0	14.7852	4.24845	0	3.4699
510	ENSG00000037897	40.6982	-0.325608	0.938046	-0.347112	0.728507	0.999883	17.3923	15.8413	99.1305	47.7051	23.4218
511	ENSG00000037965	31.9839	0.528817	0.955476	0.55346	0.579949	0.999883	5.79742	50.6922	24.7826	31.8034	46.8437
512	ENSG00000038002	20.9756	-0.415379	1.01188	-0.410501	0.681438	0.999883	11.5948	34.8509	23.3665	20.3188	14.7471
513	ENSG00000038210	10.9117	0.0234167	1.37594	0.0170188	0.986422	0.999883	20.291	3.16826	9.20497	11.4846	10.4097
514	ENSG00000038219	305.046	0.245061	0.418981	0.584898	0.558616	0.999883	334.801	181.647	335.628	287.997	385.159
515	ENSG00000038274	29.4972	1.04708	0.858511	1.21964	0.2226	0.999883	11.5948	25.3461	24.7826	41.5211	44.2412
516	ENSG00000038382	254.002	-0.170496	0.386949	-0.440616	0.659491	0.999883	282.624	287.256	228	252.66	219.471
517	ENSG00000038427	381.406	0.386802	0.374822	1.03196	0.302091	0.999883	381.18	335.836	302.348	541.541	346.123
518	ENSG00000038532	8.53139	-2.25424	1.62348	-1.38852	0.164979	0.999883	10.1455	3.16826	24.0745	3.53371	1.73495
519	ENSG00000039068	63.5954	-1.2025	0.646388	-1.86034	0.062837	0.999883	63.7716	74.9822	107.627	25.6194	45.9762
520	ENSG00000039123	210.6	-0.116395	0.39621	-0.293771	0.768933	0.999883	223.201	218.61	210.298	198.771	202.122
521	ENSG00000039139	13.4885	0.47094	1.2637	0.372667	0.709397	0.999883	8.69613	22.1778	4.24845	12.368	19.9519
522	ENSG00000039319	59.8535	-0.118723	0.627642	-0.189157	0.84997	0.999883	68.1197	46.4679	70.8075	60.9565	52.916
523	ENSG00000039523	119.484	-0.19691	0.545417	-0.361027	0.718079	0.999883	131.891	168.974	77.1802	138.698	80.6752
524	ENSG00000039560	871.669	0.169257	0.326475	0.518438	0.604153	0.999883	715.982	829.029	945.28	789.784	1078.27
525	ENSG00000039650	52.7406	-1.77359	0.790573	-2.24342	0.0248695	0.999883	72.4678	41.1874	106.919	34.4537	8.67475
526	ENSG00000040199	3.02277	1.01086	2.84819	0.354914	0.722654	0.999883	2.89871	0	3.54037	0	8.67475
527	ENSG00000040275	192.513	-0.588827	0.521156	-1.12985	0.25854	0.999883	97.1068	311.546	257.739	164.317	131.856
528	ENSG00000040341	20.5427	0.0688779	1.22407	0.0562695	0.955127	0.999883	8.69613	47.5239	4.24845	33.5702	8.67475
529	ENSG00000040487	12.542	2.04112	1.55531	1.31236	0.1894	0.999883	1.44936	0	14.8696	22.9691	23.4218
530	ENSG00000040531	11.4182	-0.304437	1.57797	-0.19293	0.847014	0.999883	0	28.5144	8.4969	7.06742	13.0121
531	ENSG00000040633	120.788	-0.442528	0.545688	-0.810954	0.417392	0.999883	202.91	119.338	83.5528	115.729	82.4101
532	ENSG00000040933	21.2294	-0.277063	1.09164	-0.253805	0.799646	0.999883	37.6832	21.1218	9.91305	7.06742	30.3616
533	ENSG00000041353	5.25565	0.170383	2.08927	0.0815514	0.935003	0.999883	0	2.11218	12.7453	7.95084	3.4699
534	ENSG00000041357	631.616	0.16548	0.345067	0.47956	0.63154	0.999883	586.989	473.127	746.311	631.65	720.004
535	ENSG00000041802	114.722	-0.127988	0.529858	-0.241551	0.809128	0.999883	76.8158	159.469	119.665	91.8764	125.784
536	ENSG00000041880	19.6662	1.3355	1.33364	1.0014	0.316634	0.999883	7.24678	0	29.0311	25.6194	36.434
537	ENSG00000041982	91.4075	-0.309745	0.560102	-0.553016	0.580253	0.999883	126.094	72.87	98.4224	98.0604	61.5907
538	ENSG00000041988	11.6981	-1.61388	1.59927	-1.00913	0.312912	0.999883	28.9871	4.22435	14.8696	0	10.4097
539	ENSG00000042062	14.298	-2.12616	1.65786	-1.28247	0.199676	0.999883	1.44936	7.39261	53.1056	0	9.54223
540	ENSG00000042088	8.07804	1.46594	1.53836	0.952925	0.340628	0.999883	5.79742	4.22435	4.24845	5.30056	20.8194
541	ENSG00000042286	20.7885	-0.0219539	1.02441	-0.0214307	0.982902	0.999883	17.3923	16.8974	28.323	30.92	10.4097
542	ENSG00000042317	62.1683	0.436791	0.659343	0.662464	0.507674	0.999883	78.2652	53.8605	31.8634	61.8399	85.0126
543	ENSG00000042429	19.5412	-0.604391	1.00377	-0.60212	0.547094	0.999883	21.7403	28.5144	17.7019	14.1348	15.6146
544	ENSG00000042445	28.657	0.402535	0.87497	0.460055	0.645477	0.999883	23.1897	27.4583	25.4907	19.4354	47.7111
545	ENSG00000042493	294.815	-0.216146	0.435618	-0.496182	0.619766	0.999883	442.053	287.256	208.174	315.384	221.206
546	ENSG00000042832	2.31897	-4.56742	3.9867	-1.14567	0.251933	0.999883	11.5948	0	0	0	0
547	ENSG00000043093	20.9618	1.09567	1.1767	0.931134	0.351784	0.999883	27.5378	1.05609	14.8696	34.4537	26.8917
548	ENSG00000043143	68.0065	0.210818	0.604258	0.348887	0.727174	0.999883	56.5249	84.487	50.9814	79.5084	68.5305
549	ENSG00000043514	10.1752	-0.32641	1.45792	-0.223888	0.822844	0.999883	23.1897	7.39261	2.8323	6.18399	11.2772
550	ENSG00000043591	6.70152	-4.62436	2.23193	-2.07191	0.0382737	0.999883	20.291	7.39261	4.95652	0	0.867475
551	ENSG00000044090	93.0245	0.300269	0.597897	0.502209	0.61552	0.999883	124.645	87.6553	43.9006	88.3427	120.579
552	ENSG00000044115	167.525	0.459461	0.479323	0.958561	0.33778	0.999883	153.632	142.572	140.907	273.862	126.651
553	ENSG00000044446	1.19668	-0.739366	4.34778	-0.170056	0.864966	0.999883	0	0	4.24845	0	1.73495
554	ENSG00000044459	158.353	0.533097	0.590843	0.902265	0.366916	0.999883	255.087	61.2531	87.8013	184.636	202.989
555	ENSG00000044524	3.03388	-4.98102	3.21569	-1.54897	0.121388	0.999883	0	9.50479	5.6646	0	0
556	ENSG00000044574	1552.42	-0.302077	0.300498	-1.00525	0.314775	0.999883	1758.07	1881.95	1398.45	1379.03	1344.59
557	ENSG00000046604	16.175	0.772941	1.15795	0.667506	0.504449	0.999883	21.7403	4.22435	12.0373	20.3188	22.5544
558	ENSG00000046647	18.3815	0.531987	1.08454	0.490516	0.623769	0.999883	8.69613	11.617	26.1988	15.9017	29.4942
559	ENSG00000046651	40.8905	-0.204645	0.758413	-0.269833	0.787289	0.999883	36.2339	46.4679	46.7329	22.9691	52.0485
560	ENSG00000046653	1.5551	3.27467	4.09763	0.799162	0.424196	0.999883	0	0	0.708075	7.06742	0
561	ENSG00000047056	14.8749	0.438891	1.19592	0.36699	0.713627	0.999883	20.291	14.7852	4.24845	19.4354	15.6146
562	ENSG00000047188	15.0182	-0.770068	1.1822	-0.651383	0.514799	0.999883	27.5378	7.39261	19.118	12.368	8.67475
563	ENSG00000047230	2.90853	-0.248177	2.88409	-0.0860503	0.931426	0.999883	5.79742	0	3.54037	0	5.20485
564	ENSG00000047249	124.036	-0.402492	0.564271	-0.713296	0.475663	0.999883	210.157	134.123	68.6833	90.1096	117.109
565	ENSG00000047315	57.6612	0.0843615	0.636479	0.132544	0.894554	0.999883	72.4678	48.58	48.1491	62.7233	56.3859
566	ENSG00000047346	28.5153	0.469077	0.857437	0.547068	0.584332	0.999883	33.3352	16.8974	24.0745	33.5702	34.699
567	ENSG00000047365	6.49431	-2.0911	2.03694	-1.02659	0.304614	0.999883	23.1897	2.11218	2.8323	0	4.33738
568	ENSG00000047410	529.001	0.0727003	0.333937	0.217706	0.827658	0.999883	531.913	445.669	577.081	572.461	517.883
569	ENSG00000047457	2.80544	0.229205	2.99609	0.0765016	0.93902	0.999883	7.24678	0	0.708075	0	6.07233
570	ENSG00000047578	5.01459	2.24853	2.43806	0.922261	0.356393	0.999883	0	5.28044	0.708075	0	19.0845
571	ENSG00000047579	13.7943	-1.62101	1.25494	-1.2917	0.196461	0.999883	26.0884	22.1778	8.4969	3.53371	8.67475
572	ENSG00000047621	45.9497	0.0400786	0.794608	0.0504382	0.959773	0.999883	60.8729	31.6826	43.9006	74.2079	19.0845
573	ENSG00000047634	4.27438	0.0241212	2.49185	0.00968003	0.992277	0.999883	0	8.4487	4.24845	0	8.67475
574	ENSG00000047644	34.8479	-0.357541	0.807912	-0.442549	0.658092	0.999883	31.8858	40.1313	42.4845	41.5211	18.217
575	ENSG00000047648	13.7197	-1.50667	1.44305	-1.04409	0.296444	0.999883	20.291	19.0096	16.2857	0	13.0121
576	ENSG00000047662	1.86542	0.365164	3.44665	0.105947	0.915624	0.999883	1.44936	0	3.54037	0	4.33738
577	ENSG00000047849	543.786	0.0140552	0.348669	0.0403111	0.967845	0.999883	505.825	652.662	466.621	621.049	472.774
578	ENSG00000047932	136.665	-0.28056	0.467219	-0.600489	0.54818	0.999883	153.632	122.506	164.981	106.011	136.194
579	ENSG00000048028	20.5024	-0.723678	1.08801	-0.665139	0.505962	0.999883	13.0442	11.617	48.1491	11.4846	18.217
580	ENSG00000048052	5.96531	2.19488	2.13203	1.02948	0.303254	0.999883	0	0	7.08075	10.6011	12.1447
581	ENSG00000048140	57.8071	-0.907245	0.740094	-1.22585	0.220255	0.999883	63.7716	29.5705	119.665	30.92	45.1087
582	ENSG00000048162	19.0327	0.986575	1.00697	0.979744	0.327213	0.999883	11.5948	13.7291	15.5776	26.5028	27.7592
583	ENSG00000048342	58.1886	-0.160915	0.732742	-0.219606	0.826178	0.999883	39.1326	77.0944	65.851	23.8525	85.0126
584	ENSG00000048392	21.7227	-1.54239	1.06818	-1.44395	0.148754	0.999883	44.93	9.50479	33.9876	13.2514	6.9398
585	ENSG00000048405	130.368	-0.994707	0.490314	-2.02871	0.0424874	0.999883	153.632	123.562	211.006	78.625	85.0126
586	ENSG00000048462	2.11218	-4.45083	4.10754	-1.08358	0.278552	0.999883	0	10.5609	0	0	0
587	ENSG00000048471	41.2311	-0.174384	0.968921	-0.179977	0.85717	0.999883	102.904	9.50479	17.7019	31.8034	44.2412
588	ENSG00000048540	2.70261	2.88758	2.8985	0.996234	0.319136	0.999883	0	0	2.12422	6.18399	5.20485
589	ENSG00000048544	191.135	-0.898964	0.552772	-1.62628	0.103889	0.999883	136.239	141.516	425.553	140.465	111.904
590	ENSG00000048649	456.438	0.181182	0.331938	0.545832	0.585182	0.999883	455.098	419.267	425.553	496.486	485.786
591	ENSG00000048707	36.0078	-0.0417714	0.820989	-0.0508793	0.959422	0.999883	39.1326	16.8974	53.1056	35.3371	35.5665
592	ENSG00000048740	148.583	-0.0673875	0.535326	-0.125881	0.899826	0.999883	192.764	191.152	70.8075	154.6	133.591
593	ENSG00000048828	478.052	-0.0450165	0.412202	-0.10921	0.913036	0.999883	526.116	580.848	345.541	625.466	312.291
594	ENSG00000048991	138.974	0.417405	0.479477	0.870542	0.384005	0.999883	142.037	140.46	85.6771	173.152	153.543
595	ENSG00000049130	44.2877	0.366118	0.751283	0.487324	0.626029	0.999883	55.0755	27.4583	36.8199	32.6868	69.398
596	ENSG00000049167	25.3964	-0.604949	0.949049	-0.637426	0.523847	0.999883	44.93	13.7291	29.7391	22.9691	15.6146
597	ENSG00000049192	28.9792	-1.98173	1.12294	-1.76477	0.0776028	0.999883	72.4678	16.8974	34.6957	0.883427	19.9519
598	ENSG00000049239	69.1951	1.37753	0.692908	1.98804	0.0468071	0.999883	47.8287	14.7852	63.7267	105.128	114.507
599	ENSG00000049245	112.128	-0.18783	0.493461	-0.380638	0.703472	0.999883	134.79	121.45	97.7143	108.662	98.0247
600	ENSG00000049246	5.21208	-0.198478	2.34352	-0.0846923	0.932506	0.999883	10.1455	0	6.37267	0	9.54223
601	ENSG00000049323	433.916	-0.116072	0.37319	-0.311028	0.75578	0.999883	537.711	352.733	453.168	487.652	338.315
602	ENSG00000049449	27.6199	-0.177795	0.938509	-0.189444	0.849745	0.999883	13.0442	23.2339	50.2733	20.3188	31.2291
603	ENSG00000049540	10.2727	0.175487	1.46472	0.119809	0.904635	0.999883	21.7403	2.11218	5.6646	8.83427	13.0121
604	ENSG00000049541	9.5834	0.218408	1.44778	0.150857	0.880089	0.999883	8.69613	12.6731	5.6646	3.53371	17.3495
605	ENSG00000049618	390.653	-0.286464	0.365223	-0.784355	0.432832	0.999883	402.921	511.146	349.081	314.5	375.617
606	ENSG00000049656	39.0358	0.200319	0.747146	0.268113	0.788613	0.999883	34.7845	29.5705	46.0249	36.2205	48.5786
607	ENSG00000049759	5.6324	0.391635	2.02503	0.193397	0.846648	0.999883	10.1455	0	4.95652	2.65028	10.4097
608	ENSG00000049860	27.9766	0.769149	0.849256	0.905674	0.365108	0.999883	18.8416	25.3461	21.2422	39.7542	34.699
609	ENSG00000049883	8.89369	0.101733	1.47663	0.0688954	0.945073	0.999883	11.5948	11.617	2.8323	11.4846	6.9398
610	ENSG00000050030	2.4736	5.03218	3.70155	1.35948	0.173994	0.999883	0	0	0	12.368	0
611	ENSG00000050130	1.83617	-4.26065	3.85689	-1.10469	0.269296	0.999883	0	4.22435	4.95652	0	0
612	ENSG00000050165	86.9957	0.587526	0.566061	1.03792	0.299308	0.999883	88.4107	83.4309	46.0249	109.545	107.567
613	ENSG00000050327	9.3405	-1.72027	1.71875	-1.00089	0.316882	0.999883	0	25.3461	13.4534	5.30056	2.60243
614	ENSG00000050344	5.52905	0.0291448	2.15611	0.0135173	0.989215	0.999883	2.89871	0	13.4534	0.883427	10.4097
615	ENSG00000050393	70.9709	-0.120979	0.674454	-0.179373	0.857645	0.999883	108.702	74.9822	36.8199	90.1096	44.2412
616	ENSG00000050405	463.298	0.10206	0.34034	0.299875	0.764272	0.999883	455.098	449.893	445.379	418.745	547.377
617	ENSG00000050426	19.1733	-0.219448	1.01472	-0.216265	0.828781	0.999883	17.3923	15.8413	27.6149	17.6685	17.3495
618	ENSG00000050438	19.0133	-1.00031	1.33978	-0.746618	0.455294	0.999883	50.7274	20.0657	0.708075	7.95084	15.6146
619	ENSG00000050628	12.0271	-0.107775	1.45653	-0.0739942	0.941015	0.999883	17.3923	6.33653	13.4534	22.0857	0.867475
620	ENSG00000050730	2.94224	-3.40793	2.79875	-1.21766	0.223353	0.999883	2.89871	5.28044	5.6646	0	0.867475
621	ENSG00000050748	16.4124	-0.657017	1.38363	-0.47485	0.634894	0.999883	0	30.6265	26.9068	13.2514	11.2772
622	ENSG00000050820	29.1157	-0.249151	0.878351	-0.283658	0.776673	0.999883	17.3923	29.5705	46.0249	30.0365	22.5544
623	ENSG00000051009	11.008	-0.496491	1.38657	-0.358071	0.72029	0.999883	18.8416	15.8413	2.8323	9.7177	7.80728
624	ENSG00000051108	71.595	-0.245146	0.61725	-0.397159	0.69125	0.999883	60.8729	110.889	57.3541	74.2079	54.6509
625	ENSG00000051128	122.779	-0.394039	0.560587	-0.702904	0.482116	0.999883	86.9613	119.338	200.385	137.815	69.398
626	ENSG00000051180	7.862	0.498898	1.73359	0.287783	0.773513	0.999883	0	11.617	8.4969	6.18399	13.0121
627	ENSG00000051382	22.7347	0.577919	1.24117	0.465625	0.641484	0.999883	0	39.0752	17.7019	28.2697	28.6267
628	ENSG00000051523	12.946	-1.40246	1.39416	-1.00596	0.314437	0.999883	1.44936	23.2339	26.9068	7.06742	6.07233
629	ENSG00000051620	274.878	-0.180103	0.427013	-0.421774	0.67319	0.999883	208.707	251.349	404.311	285.347	224.676
630	ENSG00000051825	24.2555	0.85452	0.975704	0.875798	0.38114	0.999883	11.5948	30.6265	12.7453	21.2023	45.1087
631	ENSG00000052126	93.8683	0.482146	0.526689	0.915427	0.359967	0.999883	71.0184	91.8796	80.0125	97.177	129.254
632	ENSG00000052723	10.9284	-0.630627	1.4454	-0.436299	0.66262	0.999883	10.1455	3.16826	24.7826	3.53371	13.0121
633	ENSG00000052749	61.7235	-1.04392	0.829342	-1.25873	0.208127	0.999883	34.7845	74.9822	123.205	9.7177	65.9281
634	ENSG00000052795	57.9225	-0.313709	0.668616	-0.469191	0.638933	0.999883	92.7588	42.2435	53.8137	57.4228	43.3738
635	ENSG00000052802	362.312	-0.223775	0.391909	-0.570986	0.568009	0.999883	485.534	373.855	294.559	387.825	269.785
636	ENSG00000052841	85.6119	-0.462828	0.565923	-0.81783	0.413454	0.999883	79.7146	104.553	104.087	50.3554	89.35
637	ENSG00000053254	242.063	-0.490906	0.504004	-0.974012	0.330051	0.999883	408.718	279.863	133.118	239.409	149.206
638	ENSG00000053371	55.855	0.0795365	0.69205	0.114929	0.908502	0.999883	56.5249	28.5144	78.5963	62.7233	52.916
639	ENSG00000053372	201.833	0.755392	0.445464	1.69574	0.0899352	0.999883	118.847	166.862	188.348	329.518	205.592
640	ENSG00000053438	6.31759	2.84842	1.85541	1.5352	0.124735	0.999883	0	3.16826	2.12422	15.0183	11.2772
641	ENSG00000053501	84.5557	0.936755	0.610714	1.53387	0.125062	0.999883	47.8287	73.9261	63.7267	170.501	66.7956
642	ENSG00000053524	0.983833	-0.271532	4.36837	-0.0621586	0.950437	0.999883	0	3.16826	0	0.883427	0.867475
643	ENSG00000053747	16.8022	1.01052	1.07955	0.936052	0.349246	0.999883	11.5948	15.8413	8.4969	20.3188	27.7592
644	ENSG00000053770	19.6112	0.206954	1.10853	0.186692	0.851902	0.999883	20.291	5.28044	29.7391	13.2514	29.4942
645	ENSG00000053900	16.5788	0.326372	1.07316	0.304122	0.761035	0.999883	15.9429	17.9535	11.3292	20.3188	17.3495
646	ENSG00000054116	241.762	-0.397012	0.464701	-0.854339	0.392917	0.999883	339.149	321.051	143.031	218.207	187.375
647	ENSG00000054118	232.5	0.220718	0.419436	0.526225	0.598732	0.999883	184.068	184.815	284.646	227.041	281.929
648	ENSG00000054148	3.55366	-5.21394	3.1094	-1.67683	0.093576	0.999883	2.89871	0	14.8696	0	0
649	ENSG00000054267	325.095	0.380382	0.379544	1.00221	0.316243	0.999883	315.959	277.751	276.857	299.482	455.425
650	ENSG00000054282	129.33	0.230002	0.649848	0.353932	0.72339	0.999883	31.8858	212.274	118.249	128.097	156.146
651	ENSG00000054356	21.9591	0.786481	1.07593	0.730977	0.464793	0.999883	10.1455	13.7291	26.9068	49.4719	9.54223
652	ENSG00000054392	6.95156	1.35189	1.80966	0.747045	0.455036	0.999883	7.24678	0	5.6646	8.83427	13.0121
653	ENSG00000054523	238.784	0.103316	0.451915	0.228619	0.819165	0.999883	324.656	211.218	160.733	302.132	195.182
654	ENSG00000054598	83.6266	-0.0482024	0.569545	-0.0846331	0.932553	0.999883	85.512	110.889	58.0621	80.3919	83.2776
655	ENSG00000054611	41.673	-0.523652	0.888823	-0.589152	0.555759	0.999883	10.1455	45.4118	86.3851	27.3862	39.0364
656	ENSG00000054654	65.6964	-0.0672092	0.592075	-0.113515	0.909623	0.999883	65.221	71.814	63.7267	59.1896	68.5305
657	ENSG00000054793	51.4258	-0.124007	0.73968	-0.16765	0.866859	0.999883	43.4807	74.9822	41.0683	72.441	25.1568
658	ENSG00000054965	6.69889	2.90336	1.91463	1.51641	0.129416	0.999883	0	1.05609	4.24845	23.8525	4.33738
659	ENSG00000054967	1.06091	-3.47901	4.4539	-0.781115	0.434735	0.999883	0	1.05609	4.24845	0	0
660	ENSG00000054983	9.46175	0.338444	1.45373	0.232811	0.815908	0.999883	4.34807	8.4487	12.7453	4.41714	17.3495
661	ENSG00000055044	114.997	0.177635	0.49269	0.360541	0.718443	0.999883	134.79	99.2722	94.174	117.496	129.254
662	ENSG00000055070	143.254	-0.19041	0.470794	-0.404446	0.685885	0.999883	185.518	155.245	111.876	139.582	124.049
663	ENSG00000055130	71.6507	-0.228828	0.616619	-0.371102	0.710562	0.999883	101.455	81.3187	46.0249	59.1896	70.2655
664	ENSG00000055147	34.158	1.03594	0.795051	1.30299	0.192579	0.999883	20.291	19.0096	32.5714	49.4719	49.4461
665	ENSG00000055163	34.4603	-0.694357	0.855578	-0.811565	0.417041	0.999883	63.7716	40.1313	18.4099	30.0365	19.9519
666	ENSG00000055208	53.8069	0.11206	0.675351	0.165929	0.868213	0.999883	31.8858	69.7018	54.5218	56.5393	56.3859
667	ENSG00000055211	140.091	-0.0662726	0.461167	-0.143706	0.885733	0.999883	159.429	154.189	114.708	129.864	142.266
668	ENSG00000055332	113.953	0.926433	0.536752	1.726	0.0843476	0.999883	50.7274	97.1601	102.671	190.82	128.386
669	ENSG00000055483	247.438	0.041159	0.450835	0.091295	0.927258	0.999883	136.239	289.368	307.305	255.31	248.965
670	ENSG00000055609	330.354	0.133563	0.367266	0.363669	0.716105	0.999883	265.232	322.107	366.075	338.353	360.002
671	ENSG00000055732	25.0702	0.203515	1.25382	0.162316	0.871057	0.999883	36.2339	0	34.6957	35.3371	19.0845
672	ENSG00000055917	79.3881	0.0806515	0.623942	0.129261	0.897151	0.999883	56.5249	100.328	75.764	116.612	47.7111
673	ENSG00000055950	41.5209	-0.470939	0.85963	-0.547839	0.583803	0.999883	21.7403	95.0479	23.3665	36.2205	31.2291
674	ENSG00000056050	6.63032	-1.30662	1.7127	-0.762901	0.445522	0.999883	15.9429	5.28044	4.95652	1.76685	5.20485
675	ENSG00000056097	350.778	-0.0251478	0.376304	-0.0668285	0.946718	0.999883	391.326	403.425	265.528	363.972	329.641
676	ENSG00000056277	0.94533	0.817238	4.3634	0.187294	0.85143	0.999883	0	0	2.12422	0	2.60243
677	ENSG00000056558	9.48348	0.153746	1.71858	0.089461	0.928716	0.999883	0	20.0657	7.08075	17.6685	2.60243
678	ENSG00000056586	166.705	-0.647016	0.463734	-1.39523	0.162946	0.999883	157.98	256.629	169.938	144.882	104.097
679	ENSG00000056972	61.812	-0.316815	0.78812	-0.401989	0.687692	0.999883	26.0884	140.46	34.6957	61.8399	45.9762
680	ENSG00000056998	3.57038	-0.650554	2.45023	-0.265507	0.790619	0.999883	7.24678	1.05609	4.24845	5.30056	0
681	ENSG00000057019	410.587	-0.573955	0.376655	-1.52382	0.127554	0.999883	395.674	563.951	458.124	250.893	384.292
682	ENSG00000057252	15.9242	0.671735	1.12753	0.595755	0.551339	0.999883	13.0442	6.33653	19.118	19.4354	21.6869
683	ENSG00000057294	2.29691	4.92526	3.81026	1.29263	0.196138	0.999883	0	0	0	11.4846	0
684	ENSG00000057608	352.647	-0.207711	0.371216	-0.559541	0.575793	0.999883	414.516	412.93	291.019	301.249	343.52
685	ENSG00000057657	34.6237	-0.913196	0.844066	-1.0819	0.279297	0.999883	40.582	36.9631	50.2733	10.6011	34.699
686	ENSG00000057663	17.7957	-0.0997042	1.04805	-0.0951335	0.924209	0.999883	21.7403	16.8974	16.2857	12.368	21.6869
687	ENSG00000057704	6.2002	0.804295	2.03047	0.396113	0.692022	0.999883	2.89871	2.11218	9.20497	16.7851	0
688	ENSG00000057757	68.0846	-0.643643	0.602017	-1.06914	0.285005	0.999883	100.006	64.4213	74.3479	56.5393	45.1087
689	ENSG00000057935	8.1163	0.528427	1.60553	0.329128	0.742059	0.999883	4.34807	6.33653	9.91305	1.76685	18.217
690	ENSG00000058056	32.6871	-0.328797	0.867925	-0.378831	0.704813	0.999883	20.291	58.0848	28.323	19.4354	37.3014
691	ENSG00000058063	21.9678	0.8057	1.0374	0.776656	0.437362	0.999883	18.8416	24.29	7.78882	44.1714	14.7471
692	ENSG00000058085	4.11849	-0.381202	2.54137	-0.149999	0.880766	0.999883	8.69613	0	4.95652	0	6.9398
693	ENSG00000058091	371.075	-0.123625	0.405557	-0.304828	0.760497	0.999883	500.028	366.462	285.354	432.879	270.652
694	ENSG00000058262	2358.34	-0.382653	0.410054	-0.933177	0.350728	0.999883	3568.31	2939.09	1295.78	2441.79	1546.71
695	ENSG00000058272	844.069	-0.0658141	0.356731	-0.184493	0.853627	0.999883	1047.88	962.096	569.292	854.274	786.8
696	ENSG00000058404	1.26682	0.835476	3.99013	0.209386	0.834147	0.999883	0	0	2.8323	1.76685	1.73495
697	ENSG00000058453	5.7246	0.298115	2.35699	0.126481	0.899351	0.999883	1.44936	0	14.1615	0	13.0121
698	ENSG00000058600	32.6535	0.301859	0.965728	0.312571	0.754607	0.999883	14.4936	33.7948	41.0683	9.7177	64.1932
699	ENSG00000058668	431.631	0.825868	0.425563	1.94065	0.0523012	0.999883	307.263	245.012	436.174	788.017	381.689
700	ENSG00000058729	20.6591	-0.214666	0.975686	-0.220015	0.825859	0.999883	24.639	16.8974	24.0745	21.2023	16.482
701	ENSG00000058799	19.4001	0.684661	1.04463	0.655411	0.512203	0.999883	18.8416	21.1218	7.08075	28.2697	21.6869
702	ENSG00000058804	9.99308	-0.193716	1.38121	-0.140251	0.888462	0.999883	7.24678	17.9535	6.37267	9.7177	8.67475
703	ENSG00000058866	6.90828	-0.407529	2.16001	-0.18867	0.850351	0.999883	17.3923	0	5.6646	11.4846	0
704	ENSG00000059122	19.0484	0.919289	1.30189	0.706121	0.480113	0.999883	0	12.6731	29.0311	34.4537	19.0845
705	ENSG00000059145	1.72993	0.587619	3.54042	0.165974	0.868177	0.999883	0	0	4.24845	3.53371	0.867475
706	ENSG00000059378	1.41534	0.561766	3.86992	0.145162	0.884583	0.999883	2.89871	0	0.708075	0	3.4699
707	ENSG00000059573	11.4927	0.848971	1.33407	0.636377	0.524531	0.999883	10.1455	3.16826	12.7453	9.7177	21.6869
708	ENSG00000059588	15.5937	-0.0487733	1.25287	-0.0389292	0.968947	0.999883	8.69613	33.7948	4.95652	8.83427	21.6869
709	ENSG00000059691	13.8361	1.02748	1.25144	0.821042	0.411622	0.999883	2.89871	10.5609	15.5776	13.2514	26.8917
710	ENSG00000059728	10.8537	1.33204	1.52241	0.874956	0.381598	0.999883	0	13.7291	6.37267	18.552	15.6146
711	ENSG00000059758	31.3897	-0.374139	0.80725	-0.463473	0.643025	0.999883	33.3352	32.7387	37.528	23.8525	29.4942
712	ENSG00000059769	37.7791	-0.544887	0.795455	-0.685	0.493344	0.999883	28.9871	58.0848	42.4845	19.4354	39.9039
713	ENSG00000059804	47.5636	0.383443	0.70924	0.540639	0.588756	0.999883	27.5378	41.1874	58.0621	47.7051	63.3257
714	ENSG00000060069	30.2315	-0.528372	1.14121	-0.462995	0.643368	0.999883	47.8287	5.28044	50.2733	3.53371	44.2412
715	ENSG00000060138	262.894	-0.0939538	0.469464	-0.20013	0.841379	0.999883	139.138	283.031	385.901	228.808	277.592
716	ENSG00000060237	630.329	-0.0188577	0.347123	-0.0543256	0.956676	0.999883	662.355	717.083	521.851	738.545	511.81
717	ENSG00000060303	2.40053	3.82442	3.10858	1.23028	0.218594	0.999883	1.44936	0	0	7.95084	2.60243
718	ENSG00000060339	519.051	-0.0714181	0.33701	-0.211917	0.832172	0.999883	591.337	541.773	455.292	464.683	542.172
719	ENSG00000060491	32.9508	-0.240924	0.839769	-0.286893	0.774194	0.999883	39.1326	40.1313	26.1988	16.7851	42.5063
720	ENSG00000060642	5.47214	0.614617	1.99343	0.308321	0.757838	0.999883	0	6.33653	7.08075	3.53371	10.4097
721	ENSG00000060656	62.9369	-0.321816	0.657416	-0.489517	0.624476	0.999883	55.0755	105.609	44.6087	53.0056	56.3859
722	ENSG00000060688	37.9463	-0.156513	0.765419	-0.20448	0.837978	0.999883	39.1326	52.8044	26.9068	34.4537	36.434
723	ENSG00000060709	1.90096	-4.29884	4.26907	-1.00697	0.313948	0.999883	0	9.50479	0	0	0
724	ENSG00000060718	34.142	0.631685	0.784643	0.805061	0.420784	0.999883	33.3352	27.4583	23.3665	37.1039	49.4461
725	ENSG00000060749	215.138	-0.179873	0.40428	-0.444923	0.656376	0.999883	198.562	239.732	238.621	177.569	221.206
726	ENSG00000060762	48.7869	-0.398997	0.731143	-0.545716	0.585261	0.999883	40.582	71.814	49.5652	23.8525	58.1208
727	ENSG00000060982	69.0376	0.212656	0.684587	0.310634	0.756079	0.999883	84.0626	24.29	86.3851	68.9073	81.5427
728	ENSG00000061273	145.761	-0.327329	0.535876	-0.61083	0.541312	0.999883	94.2081	124.618	256.323	115.729	137.929
729	ENSG00000061337	1.35608	3.05665	4.32705	0.706407	0.479935	0.999883	0	0	0.708075	0	6.07233
730	ENSG00000061455	1.5806	4.38618	3.94713	1.11123	0.266468	0.999883	0	0	0	5.30056	2.60243
731	ENSG00000061676	85.8813	0.150603	0.562783	0.267603	0.789005	0.999883	91.3094	59.1409	96.2982	75.0913	107.567
732	ENSG00000061794	54.6425	-0.334779	0.679647	-0.492577	0.622311	0.999883	78.2652	43.2996	57.3541	33.5702	60.7233
733	ENSG00000061918	10.1603	1.76311	1.89319	0.93129	0.351703	0.999883	15.9429	0	0	8.83427	26.0243
734	ENSG00000061936	98.9876	0.12934	0.640348	0.201984	0.839929	0.999883	79.7146	58.0848	147.988	53.0056	156.146
735	ENSG00000061938	19.9175	0.226687	1.00589	0.225359	0.8217	0.999883	20.291	15.8413	19.8261	14.1348	29.4942
736	ENSG00000061987	20.4379	2.25871	1.09322	2.0661	0.0388189	0.999883	13.0442	5.28044	6.37267	15.9017	61.5907
737	ENSG00000062194	125.557	-0.26036	0.492147	-0.529029	0.596785	0.999883	153.632	102.44	147.28	130.747	93.6873
738	ENSG00000062370	1.21447	4.00651	4.36251	0.918397	0.358411	0.999883	0	0	0	0	6.07233
739	ENSG00000062485	62.1435	-0.146469	0.645307	-0.226975	0.820443	0.999883	76.8158	79.2066	38.236	60.0731	56.3859
740	ENSG00000062582	2.42893	5.00642	3.72708	1.34325	0.17919	0.999883	0	0	0	0	12.1447
741	ENSG00000062598	67.7165	-0.719052	0.675856	-1.06391	0.287368	0.999883	97.1068	108.777	35.4037	55.6559	41.6388
742	ENSG00000062650	165.92	0.311472	0.461345	0.675139	0.499588	0.999883	102.904	158.413	191.888	187.287	189.11
743	ENSG00000062716	102.734	0.331641	0.581131	0.570682	0.568215	0.999883	133.341	46.4679	99.8386	133.398	100.627
744	ENSG00000062725	68.1355	-0.557796	0.593426	-0.939958	0.347239	0.999883	92.7588	73.9261	67.9752	58.3062	47.7111
745	ENSG00000062822	1.55191	3.27105	3.71856	0.879655	0.379046	0.999883	0	0	0.708075	6.18399	0.867475
746	ENSG00000063046	56.3824	0.362996	0.697893	0.520131	0.602972	0.999883	55.0755	24.29	72.2236	59.1896	71.133
747	ENSG00000063176	5.40604	-0.23699	2.36804	-0.100079	0.920282	0.999883	17.3923	0	0	5.30056	4.33738
748	ENSG00000063177	2259	-0.520447	0.45512	-1.14354	0.252816	0.999883	3584.26	2800.74	1326.93	2616.71	966.367
749	ENSG00000063180	1.83136	-4.24675	3.93623	-1.07889	0.280638	0.999883	0	8.4487	0.708075	0	0
750	ENSG00000063241	13.2486	-0.102817	1.19845	-0.0857922	0.931632	0.999883	13.0442	17.9535	9.91305	9.7177	15.6146
751	ENSG00000063244	19.6422	0.0521315	0.995071	0.0523897	0.958218	0.999883	17.3923	17.9535	22.6584	16.7851	23.4218
752	ENSG00000063245	659.509	-0.309379	0.372228	-0.831155	0.405886	0.999883	975.416	681.176	488.572	597.197	555.184
753	ENSG00000063322	32.3507	0.17149	0.999579	0.171562	0.863782	0.999883	4.34807	33.7948	53.8137	22.0857	47.7111
754	ENSG00000063601	15.0072	0.602416	1.14434	0.526431	0.598589	0.999883	10.1455	17.9535	9.20497	23.8525	13.8796
755	ENSG00000063660	235.105	-0.121123	0.452773	-0.267514	0.789073	0.999883	152.182	238.676	337.044	192.587	255.038
756	ENSG00000063761	2.60349	-1.39302	3.06004	-0.455227	0.648946	0.999883	7.24678	3.16826	0	0	2.60243
757	ENSG00000063854	4.51754	0.826403	1.91973	0.43048	0.666847	0.999883	2.89871	3.16826	4.24845	7.06742	5.20485
758	ENSG00000063978	29.96	-1.21323	0.861792	-1.4078	0.15919	0.999883	55.0755	33.7948	27.6149	19.4354	13.8796
759	ENSG00000064012	1.69059	3.23117	3.55165	0.909766	0.362946	0.999883	1.44936	0	0	3.53371	3.4699
760	ENSG00000064042	59.0533	1.14266	0.740297	1.54351	0.122707	0.999883	37.6832	16.8974	64.4348	56.5393	119.712
761	ENSG00000064102	100.325	-0.380382	0.557133	-0.682749	0.494765	0.999883	91.3094	103.497	136.658	55.6559	114.507
762	ENSG00000064115	27.5067	0.524447	0.881531	0.594928	0.551892	0.999883	15.9429	24.29	29.7391	42.4045	25.1568
763	ENSG00000064199	12.608	-0.328254	1.24952	-0.262704	0.792779	0.999883	7.24678	21.1218	12.7453	13.2514	8.67475
764	ENSG00000064205	10.612	1.49466	1.72318	0.867387	0.38573	0.999883	10.1455	6.33653	2.12422	34.4537	0
765	ENSG00000064225	53.4562	-1.15852	0.724465	-1.59914	0.109789	0.999883	62.3223	61.2531	82.1367	46.8216	14.7471
766	ENSG00000064270	1.15948	-3.55772	4.45146	-0.799226	0.42416	0.999883	5.79742	0	0	0	0
767	ENSG00000064300	1.22085	4.01386	4.36233	0.920117	0.357511	0.999883	0	0	0	1.76685	4.33738
768	ENSG00000064309	3.76832	-5.26966	3.39839	-1.55064	0.120989	0.999883	18.8416	0	0	0	0
769	ENSG00000064313	166.833	-0.618531	0.435723	-1.41955	0.155738	0.999883	213.055	203.825	164.981	136.931	115.374
770	ENSG00000064393	94.7261	-0.652146	0.607787	-1.07299	0.283278	0.999883	173.923	57.0287	101.963	58.3062	82.4101
771	ENSG00000064419	127.064	0.404482	0.559901	0.722418	0.470038	0.999883	84.0626	77.0944	175.603	104.244	194.314
772	ENSG00000064545	36.4921	-0.996636	0.791579	-1.25905	0.208013	0.999883	66.6704	32.7387	37.528	22.9691	22.5544
773	ENSG00000064547	2.38431	3.245	3.06856	1.0575	0.290283	0.999883	0	0	1.41615	5.30056	5.20485
774	ENSG00000064601	2.09789	4.79484	3.49262	1.37285	0.169799	0.999883	0	0	0	4.41714	6.07233
775	ENSG00000064607	125.868	0.55105	0.727447	0.757512	0.448743	0.999883	14.4936	133.067	169.938	119.263	192.58
776	ENSG00000064651	114.75	0.211069	0.65693	0.321296	0.747986	0.999883	137.689	29.5705	156.485	153.716	96.2898
777	ENSG00000064652	15.7335	0.213708	1.24756	0.1713	0.863988	0.999883	24.639	2.11218	17.7019	21.2023	13.0121
778	ENSG00000064655	45.535	0.195769	0.902535	0.216911	0.828278	0.999883	76.8158	46.4679	6.37267	47.7051	50.3136
779	ENSG00000064666	42.7416	-0.0423063	0.816624	-0.0518064	0.958683	0.999883	52.1768	13.7291	63.7267	44.1714	39.9039
780	ENSG00000064692	41.1389	-0.78295	0.764664	-1.02391	0.305876	0.999883	33.3352	53.8605	60.8944	19.4354	38.1689
781	ENSG00000064703	65.4559	-0.535367	0.691487	-0.774226	0.438797	0.999883	127.543	49.6361	47.441	64.4902	38.1689
782	ENSG00000064726	7.56447	0.478202	1.74985	0.273282	0.784636	0.999883	0	7.39261	12.0373	9.7177	8.67475
783	ENSG00000064763	13.2222	-0.891507	1.34435	-0.66315	0.507235	0.999883	20.291	2.11218	26.1988	8.83427	8.67475
784	ENSG00000064932	10.176	-0.468578	1.64234	-0.285311	0.775406	0.999883	13.0442	0	21.2422	6.18399	10.4097
785	ENSG00000064933	19.1707	1.04066	1.30999	0.794409	0.426958	0.999883	0	9.50479	30.4472	21.2023	34.699
786	ENSG00000064961	24.0463	0.225015	0.913238	0.246393	0.805378	0.999883	26.0884	25.3461	16.2857	25.6194	26.8917
787	ENSG00000064995	72.1222	-0.595132	0.575363	-1.03436	0.300968	0.999883	95.6575	73.9261	80.7205	55.6559	54.6509
788	ENSG00000064999	27.2186	-0.117109	0.880731	-0.132967	0.894219	0.999883	26.0884	34.8509	23.3665	33.5702	18.217
789	ENSG00000065000	915.184	0.155663	0.326333	0.477008	0.633357	0.999883	784.101	879.721	961.566	793.318	1157.21
790	ENSG00000065029	10.2727	-0.597752	1.34073	-0.445841	0.655712	0.999883	11.5948	8.4487	15.5776	7.06742	8.67475
791	ENSG00000065054	46.8932	-0.984419	0.835785	-1.17784	0.238861	0.999883	21.7403	91.8796	61.6025	14.1348	45.1087
792	ENSG00000065057	13.483	0.577992	1.64189	0.352028	0.724817	0.999883	0	11.617	21.9503	0.883427	32.9641
793	ENSG00000065060	5.90014	-0.299504	2.04691	-0.14632	0.883669	0.999883	1.44936	10.5609	7.08075	0	10.4097
794	ENSG00000065135	159.785	-0.0883903	0.500438	-0.176626	0.859802	0.999883	92.7588	190.096	207.466	180.219	128.386
795	ENSG00000065150	197.879	-0.017533	0.492274	-0.0356163	0.971588	0.999883	233.346	264.022	99.8386	197.004	195.182
796	ENSG00000065154	6.32097	-0.590865	2.04232	-0.28931	0.772344	0.999883	1.44936	16.8974	3.54037	9.7177	0
797	ENSG00000065183	104.578	0.72209	0.519758	1.38928	0.164747	0.999883	60.8729	101.384	86.3851	151.066	123.181
798	ENSG00000065243	91.8095	-0.0919639	0.537888	-0.170972	0.864246	0.999883	102.904	93.9918	85.6771	68.9073	107.567
799	ENSG00000065268	55.5246	-0.47896	0.761132	-0.629273	0.52917	0.999883	85.512	40.1313	62.3106	17.6685	72.0004
800	ENSG00000065308	193.118	0.200938	0.424949	0.472853	0.636318	0.999883	189.866	154.189	202.509	242.059	176.965
801	ENSG00000065320	12.4335	0.0672602	1.25592	0.0535546	0.95729	0.999883	14.4936	15.8413	6.37267	16.7851	8.67475
802	ENSG00000065328	66.9166	0.169912	0.799047	0.212643	0.831605	0.999883	108.702	71.814	11.3292	74.2079	68.5305
803	ENSG00000065357	104.57	-0.490447	0.565015	-0.868026	0.38538	0.999883	84.0626	86.5992	183.391	75.9747	92.8199
804	ENSG00000065361	5.73816	-2.72161	2.66784	-1.02015	0.307656	0.999883	26.0884	0	0	0	2.60243
805	ENSG00000065413	7.42366	1.4737	1.82787	0.806236	0.420107	0.999883	0	2.11218	10.6211	5.30056	19.0845
806	ENSG00000065427	145.629	0.37849	0.498738	0.758895	0.447915	0.999883	75.3665	148.908	164.981	175.802	163.085
807	ENSG00000065457	73.5977	0.92197	0.705444	1.30694	0.191235	0.999883	15.9429	66.5335	79.3044	82.1587	124.049
808	ENSG00000065485	42.0211	-0.576937	0.730029	-0.790293	0.429357	0.999883	62.3223	34.8509	48.1491	32.6868	32.0966
809	ENSG00000065491	12.8966	0.796144	1.55838	0.510879	0.609436	0.999883	21.7403	8.4487	0	25.6194	8.67475
810	ENSG00000065518	61.0568	-0.612182	0.625323	-0.978986	0.327587	0.999883	55.0755	88.7114	68.6833	47.7051	45.1087
811	ENSG00000065526	167.852	0.377168	0.438265	0.860594	0.389462	0.999883	130.442	142.572	176.311	216.44	173.495
812	ENSG00000065534	477.816	0.457091	0.360628	1.26749	0.204982	0.999883	346.396	396.033	504.149	482.351	660.149
813	ENSG00000065548	1310.13	-0.538928	0.344438	-1.56466	0.117662	0.999883	1800.1	1523.93	1166.91	1265.95	793.74
814	ENSG00000065559	55.5835	0.205862	0.631518	0.325979	0.74444	0.999883	55.0755	47.5239	54.5218	60.0731	60.7233
815	ENSG00000065600	3.84854	-0.211749	2.704	-0.0783094	0.937582	0.999883	11.5948	0	0.708075	0	6.9398
816	ENSG00000065609	1.51286	-1.10133	4.19799	-0.262348	0.793053	0.999883	5.79742	0	0	1.76685	0
817	ENSG00000065613	243.584	0.0851616	0.41824	0.203619	0.838651	0.999883	185.518	266.134	261.28	198.771	306.219
818	ENSG00000065615	17.7513	0.98358	1.09111	0.90145	0.367349	0.999883	5.79742	11.617	20.5342	27.3862	23.4218
819	ENSG00000065618	0.991305	-3.38806	4.4569	-0.760183	0.447145	0.999883	0	0	4.95652	0	0
820	ENSG00000065621	11.3891	0.423052	1.72419	0.245363	0.806176	0.999883	13.0442	0	16.9938	0.883427	26.0243
821	ENSG00000065665	8.15267	0.306071	1.6411	0.186503	0.85205	0.999883	1.44936	13.7291	7.08075	15.9017	2.60243
822	ENSG00000065802	59.9227	-0.993513	0.632482	-1.57082	0.116226	0.999883	79.7146	67.5896	77.1802	29.1531	45.9762
823	ENSG00000065809	102.043	-0.361237	0.54558	-0.662116	0.507897	0.999883	91.3094	114.057	130.286	59.1896	115.374
824	ENSG00000065833	38.9847	-0.217924	0.746036	-0.29211	0.770203	0.999883	39.1326	42.2435	42.4845	44.1714	26.8917
825	ENSG00000065882	30.5836	-0.0413731	0.948887	-0.0436018	0.965222	0.999883	8.69613	57.0287	26.9068	23.8525	36.434
826	ENSG00000065883	113.419	0.236958	0.527056	0.449587	0.653008	0.999883	88.4107	79.2066	149.404	109.545	140.531
827	ENSG00000065911	34.0432	0.263304	1.00678	0.261532	0.793682	0.999883	2.89871	31.6826	59.4783	37.9874	38.1689
828	ENSG00000065923	119.055	0.669215	0.6103	1.09653	0.272845	0.999883	37.6832	163.694	87.0932	176.685	130.121
829	ENSG00000065970	29.0303	-0.750764	0.89302	-0.840703	0.400515	0.999883	46.3794	15.8413	41.7764	21.2023	19.9519
830	ENSG00000065978	1282.8	0.0887113	0.295745	0.299959	0.764209	0.999883	1143.54	1392.98	1216.47	1322.49	1338.51
831	ENSG00000065989	17.6689	0.216398	1.04902	0.206287	0.836567	0.999883	18.8416	19.0096	12.0373	15.9017	22.5544
832	ENSG00000066027	147.59	-0.276672	0.556843	-0.496858	0.619289	0.999883	223.201	184.815	68.6833	151.949	109.302
833	ENSG00000066032	1.1462	-3.56772	4.45116	-0.801527	0.422827	0.999883	2.89871	0	2.8323	0	0
834	ENSG00000066044	88.3833	0.925215	0.556929	1.66128	0.0966572	0.999883	86.9613	59.1409	49.5652	137.815	108.434
835	ENSG00000066084	65.2557	-0.736417	0.641988	-1.14709	0.251345	0.999883	113.05	68.6457	51.6895	52.1222	40.7713
836	ENSG00000066117	28.3516	-0.44731	1.04533	-0.427914	0.668714	0.999883	36.2339	54.9166	4.24845	21.2023	25.1568
837	ENSG00000066135	33.4889	0.829078	0.865728	0.957666	0.338231	0.999883	31.8858	33.7948	11.3292	60.0731	30.3616
838	ENSG00000066136	4.84226	-0.703746	2.20338	-0.319394	0.749428	0.999883	7.24678	0	9.91305	6.18399	0.867475
839	ENSG00000066279	167.76	0.169008	0.474905	0.355877	0.721933	0.999883	113.05	228.115	138.075	167.851	191.712
840	ENSG00000066294	2.60243	5.10595	3.62831	1.40726	0.159352	0.999883	0	0	0	0	13.0121
841	ENSG00000066322	149.051	-0.0420254	0.51573	-0.0814873	0.935054	0.999883	181.169	168.974	102.671	197.888	94.5548
842	ENSG00000066379	2.07558	3.72616	3.27052	1.13932	0.254571	0.999883	0	0	0.708075	7.06742	2.60243
843	ENSG00000066382	3.42469	0.622701	3.04304	0.204631	0.83786	0.999883	0	8.4487	0	0	8.67475
844	ENSG00000066405	3.35407	1.26017	2.73273	0.46114	0.644698	0.999883	0	2.11218	4.24845	0	10.4097
845	ENSG00000066422	87.1762	0.0928971	0.551372	0.168484	0.866203	0.999883	101.455	77.0944	76.4721	71.5576	109.302
846	ENSG00000066427	69.5966	0.200088	0.68764	0.290979	0.771068	0.999883	59.4236	27.4583	109.752	70.6742	80.6752
847	ENSG00000066455	54.5196	-0.96573	0.674989	-1.43073	0.152507	0.999883	65.221	74.9822	63.0187	46.8216	22.5544
848	ENSG00000066468	4.14109	-0.358722	2.27482	-0.157692	0.874699	0.999883	10.1455	0	3.54037	4.41714	2.60243
849	ENSG00000066557	4.58688	-2.37071	2.03511	-1.1649	0.244058	0.999883	7.24678	5.28044	7.78882	0.883427	1.73495
850	ENSG00000066583	10.8193	-0.346819	1.53048	-0.226607	0.820729	0.999883	24.639	1.05609	9.91305	15.0183	3.4699
851	ENSG00000066629	57.717	0.0431423	0.729077	0.0591739	0.952814	0.999883	21.7403	55.9726	92.7578	55.6559	62.4582
852	ENSG00000066651	11.5937	1.33851	1.56408	0.85578	0.392119	0.999883	5.79742	0	15.5776	8.83427	27.7592
853	ENSG00000066654	61.1315	-0.567146	0.627916	-0.903219	0.36641	0.999883	78.2652	76.0383	56.646	56.5393	38.1689
854	ENSG00000066697	58.5892	0.037892	0.681868	0.0555709	0.955684	0.999883	75.3665	28.5144	70.0994	54.7725	64.1932
855	ENSG00000066735	1.44936	-3.88495	4.44258	-0.874481	0.381856	0.999883	7.24678	0	0	0	0
856	ENSG00000066739	16.1984	1.69687	1.36335	1.24464	0.213265	0.999883	0	5.28044	19.8261	20.3188	35.5665
857	ENSG00000066777	111.608	-0.0826876	0.515963	-0.160259	0.872677	0.999883	84.0626	105.609	152.236	103.361	112.772
858	ENSG00000066813	2.31897	-4.56742	3.9867	-1.14567	0.251933	0.999883	11.5948	0	0	0	0
859	ENSG00000066827	8.58753	-0.463574	1.74528	-0.265616	0.790535	0.999883	0	23.2339	5.6646	8.83427	5.20485
860	ENSG00000066855	14.5446	0.96877	1.24846	0.775973	0.437765	0.999883	15.9429	11.617	4.24845	7.95084	32.9641
861	ENSG00000066926	14.018	-0.547453	1.33732	-0.409367	0.68227	0.999883	4.34807	31.6826	12.0373	18.552	3.4699
862	ENSG00000066933	105.21	0.276796	0.506822	0.54614	0.58497	0.999883	118.847	91.8796	80.7205	117.496	117.109
863	ENSG00000067048	17.6363	0.892492	1.27199	0.701651	0.482897	0.999883	24.639	13.7291	1.41615	37.9874	10.4097
864	ENSG00000067057	132.474	-0.641098	0.482921	-1.32754	0.184329	0.999883	111.6	167.918	184.099	101.594	97.1572
865	ENSG00000067064	7.62433	-0.838088	1.95577	-0.42852	0.668273	0.999883	1.44936	0	26.1988	3.53371	6.9398
866	ENSG00000067066	104.482	0.246848	0.558014	0.44237	0.658222	0.999883	85.512	138.347	67.9752	86.5759	144.001
867	ENSG00000067082	346.814	-0.211342	0.438627	-0.481827	0.629929	0.999883	275.378	379.135	445.379	195.237	438.942
868	ENSG00000067113	17.092	-1.11094	1.4247	-0.77977	0.435526	0.999883	40.582	0	24.7826	7.95084	12.1447
869	ENSG00000067141	23.0907	-1.2426	1.00287	-1.23905	0.215327	0.999883	20.291	52.8044	16.9938	11.4846	13.8796
870	ENSG00000067177	8.84438	-3.37253	1.98902	-1.69558	0.0899663	0.999883	37.6832	1.05609	2.8323	2.65028	0
871	ENSG00000067182	465.237	-0.107452	0.37915	-0.283403	0.776868	0.999883	598.584	512.202	327.131	478.818	409.448
872	ENSG00000067208	181.764	-0.128812	0.422319	-0.305011	0.760358	0.999883	173.923	192.208	198.261	194.354	150.073
873	ENSG00000067221	19.0226	-0.872528	1.01343	-0.860968	0.389256	0.999883	21.7403	27.4583	20.5342	12.368	13.0121
874	ENSG00000067225	4170.06	-0.724519	0.294399	-2.46101	0.0138546	0.999883	4859.69	4107.12	5889.06	2891.46	3102.96
875	ENSG00000067248	164.841	-0.0449357	0.431047	-0.104248	0.916973	0.999883	166.676	164.75	169.23	143.115	180.435
876	ENSG00000067365	8.79355	1.37388	1.63371	0.840959	0.400371	0.999883	0	7.39261	8.4969	17.6685	10.4097
877	ENSG00000067369	357.78	-0.167973	0.404833	-0.414919	0.678201	0.999883	513.072	337.948	272.609	379.874	285.399
878	ENSG00000067445	1.74905	1.09404	3.88087	0.281905	0.778016	0.999883	0	0	3.54037	0	5.20485
879	ENSG00000067533	72.9493	0.137017	0.65628	0.208779	0.834621	0.999883	55.0755	38.0192	116.832	70.6742	84.1451
880	ENSG00000067560	341.274	0.203604	0.368152	0.553044	0.580234	0.999883	355.092	353.789	257.031	363.972	376.484
881	ENSG00000067596	81.3772	-0.480089	0.614018	-0.781881	0.434285	0.999883	117.398	110.889	47.441	57.4228	73.7354
882	ENSG00000067704	53.7219	-1.03206	0.720626	-1.43217	0.152094	0.999883	76.8158	85.5431	40.3603	45.9382	19.9519
883	ENSG00000067715	9.43842	2.83287	1.79256	1.58035	0.114027	0.999883	0	0	7.78882	20.3188	19.0845
884	ENSG00000067798	283.782	-0.0211193	0.450384	-0.0468917	0.9626	0.999883	181.169	249.237	424.845	325.101	238.556
885	ENSG00000067829	42.0374	-1.1883	0.813946	-1.45992	0.144312	0.999883	78.2652	30.6265	53.8137	35.3371	12.1447
886	ENSG00000067836	7.58417	0.643033	1.58292	0.406231	0.684573	0.999883	8.69613	2.11218	7.78882	13.2514	6.07233
887	ENSG00000067900	767.191	0.510851	0.310489	1.64531	0.0999054	0.999883	592.786	688.569	685.417	900.212	968.97
888	ENSG00000067955	155.145	-0.265392	0.434652	-0.610586	0.541474	0.999883	171.024	161.581	166.398	143.999	132.724
889	ENSG00000067992	6.88168	-0.607541	1.64327	-0.369715	0.711595	0.999883	10.1455	3.16826	10.6211	3.53371	6.9398
890	ENSG00000068001	4.48801	-0.0960042	2.4418	-0.039317	0.968638	0.999883	0	7.39261	6.37267	0	8.67475
891	ENSG00000068024	6.7642	-0.955643	1.87605	-0.509391	0.610478	0.999883	0	9.50479	15.5776	3.53371	5.20485
892	ENSG00000068028	69.8928	-0.530606	0.583127	-0.909933	0.362858	0.999883	84.0626	68.6457	86.3851	59.1896	51.181
893	ENSG00000068078	1.59017	4.39471	4.35439	1.00926	0.31285	0.999883	0	0	0	7.95084	0
894	ENSG00000068079	14.0437	-0.400395	1.35448	-0.295609	0.767529	0.999883	1.44936	33.7948	11.3292	12.368	11.2772
895	ENSG00000068097	45.4661	-0.74241	0.726082	-1.02249	0.30655	0.999883	52.1768	38.0192	72.2236	39.7542	25.1568
896	ENSG00000068120	28.1736	-0.610259	0.873433	-0.69869	0.484746	0.999883	30.4365	22.1778	45.3168	23.8525	19.0845
897	ENSG00000068137	4.05845	-2.19886	2.62682	-0.83708	0.402548	0.999883	0	2.11218	15.5776	0	2.60243
898	ENSG00000068305	56.3838	-0.295128	0.693688	-0.425447	0.670511	0.999883	49.2781	82.3748	50.9814	69.7908	29.4942
899	ENSG00000068308	387.961	-0.181029	0.397024	-0.455966	0.648414	0.999883	462.344	448.837	310.845	453.198	264.58
900	ENSG00000068323	272.479	-0.345497	0.493665	-0.699861	0.484014	0.999883	466.692	242.9	184.808	311.85	156.146
901	ENSG00000068354	7.96063	-2.14622	1.75124	-1.22554	0.220373	0.999883	13.0442	7.39261	14.1615	0	5.20485
902	ENSG00000068366	113.003	-0.274387	0.54461	-0.503822	0.614387	0.999883	104.354	78.1505	181.267	95.4101	105.832
903	ENSG00000068383	2.82906	2.56203	2.64645	0.968101	0.332994	0.999883	0	2.11218	0.708075	2.65028	8.67475
904	ENSG00000068394	6.05262	-0.343265	2.00589	-0.171129	0.864122	0.999883	4.34807	12.6731	2.8323	0	10.4097
905	ENSG00000068400	122.77	-0.133897	0.58766	-0.227847	0.819765	0.999883	130.442	54.9166	196.137	136.931	95.4223
906	ENSG00000068438	14.4865	0.143164	1.14662	0.124857	0.900637	0.999883	18.8416	9.50479	13.4534	15.0183	15.6146
907	ENSG00000068489	463.157	0.66477	0.409105	1.62494	0.104176	0.999883	269.58	288.312	566.46	598.08	593.353
908	ENSG00000068650	7.36953	-0.604607	2.12668	-0.284297	0.776183	0.999883	0	0	25.4907	4.41714	6.9398
909	ENSG00000068654	57.5976	0.290716	0.64513	0.450631	0.652255	0.999883	36.2339	65.4774	56.646	68.9073	60.7233
910	ENSG00000068697	255.612	0.528614	0.406644	1.29994	0.193621	0.999883	173.923	284.088	193.304	311.85	314.894
911	ENSG00000068724	11.6115	0.802773	1.59469	0.503405	0.61468	0.999883	11.5948	1.05609	14.1615	0.883427	30.3616
912	ENSG00000068745	83.613	-0.219085	0.709089	-0.308966	0.757347	0.999883	156.53	84.487	25.4907	82.1587	69.398
913	ENSG00000068784	56.9784	-0.682778	0.671803	-1.01634	0.309469	0.999883	97.1068	54.9166	49.5652	49.4719	33.8315
914	ENSG00000068796	76.505	0.723257	0.61556	1.17496	0.240012	0.999883	72.4678	31.6826	77.8882	101.594	98.8922
915	ENSG00000068831	4.92781	-5.65783	3.14423	-1.79943	0.0719501	0.999883	24.639	0	0	0	0
916	ENSG00000068878	125.732	-0.300428	0.568947	-0.528041	0.597471	0.999883	59.4236	196.432	151.528	99.8273	121.447
917	ENSG00000068885	7.00683	0.164641	1.87312	0.0878964	0.929959	0.999883	15.9429	0	4.24845	5.30056	9.54223
918	ENSG00000068903	13.4216	-0.57971	1.76692	-0.328091	0.742843	0.999883	0	15.8413	30.4472	0	20.8194
919	ENSG00000068912	212.724	0.0145331	0.437406	0.0332256	0.973495	0.999883	176.821	270.358	188.348	167.851	260.243
920	ENSG00000069011	406.958	-0.479549	0.343149	-1.3975	0.162265	0.999883	417.414	468.903	489.988	340.119	318.363
921	ENSG00000069020	64.7764	-0.761495	0.656521	-1.15989	0.246092	0.999883	120.297	64.4213	48.1491	44.1714	46.8437
922	ENSG00000069188	1.73178	3.44444	3.9264	0.877252	0.38035	0.999883	0	0	0.708075	7.95084	0
923	ENSG00000069248	20.2738	0.283619	0.982119	0.288783	0.772748	0.999883	18.8416	15.8413	21.2422	18.552	26.8917
924	ENSG00000069275	8859.57	-0.371005	0.344925	-1.07561	0.282101	0.999883	12634	10397.2	6199.9	8477.37	6589.34
925	ENSG00000069329	434.469	-0.0512391	0.395807	-0.129455	0.896998	0.999883	611.628	377.023	334.211	492.952	356.532
926	ENSG00000069345	107.85	0.698472	0.524868	1.33076	0.183269	0.999883	79.7146	117.226	62.3106	133.398	146.603
927	ENSG00000069399	14.2016	-0.844764	1.19721	-0.705613	0.480429	0.999883	8.69613	27.4583	15.5776	10.6011	8.67475
928	ENSG00000069424	3.70349	1.22431	2.60561	0.469876	0.638444	0.999883	0	0	7.08075	8.83427	2.60243
929	ENSG00000069431	15.794	0.621734	1.17758	0.527978	0.597514	0.999883	13.0442	5.28044	20.5342	11.4846	28.6267
930	ENSG00000069493	1.55535	-4.02536	4.12835	-0.975054	0.329533	0.999883	0	2.11218	5.6646	0	0
931	ENSG00000069509	4.06163	-0.0861432	2.33434	-0.0369026	0.970563	0.999883	0	3.16826	9.20497	7.06742	0.867475
932	ENSG00000069667	4.18544	0.110333	2.32087	0.0475395	0.962083	0.999883	8.69613	0	3.54037	0.883427	7.80728
933	ENSG00000069702	24.5277	1.29006	0.912857	1.41322	0.157592	0.999883	11.5948	20.0657	14.8696	35.3371	40.7713
934	ENSG00000069849	502.874	-0.285983	0.369756	-0.773437	0.439264	0.999883	424.661	552.334	647.889	354.254	535.232
935	ENSG00000069869	93.7504	0.550038	0.680994	0.807699	0.419264	0.999883	30.4365	52.8044	152.944	100.711	131.856
936	ENSG00000069956	88.9354	-0.109333	0.586213	-0.186508	0.852047	0.999883	117.398	85.5431	72.2236	115.729	53.7835
937	ENSG00000069966	11.0876	0.675399	1.56511	0.431535	0.666079	0.999883	10.1455	1.05609	15.5776	1.76685	26.8917
938	ENSG00000069974	45.393	-0.172714	0.836294	-0.206523	0.836383	0.999883	42.0313	55.9726	44.6087	11.4846	72.8679
939	ENSG00000070010	109.266	-0.347609	0.509649	-0.682055	0.495204	0.999883	124.645	99.2722	134.534	75.9747	111.904
940	ENSG00000070018	72.415	-0.402814	0.642807	-0.626648	0.53089	0.999883	101.455	99.2722	40.3603	70.6742	50.3136
941	ENSG00000070019	1.47852	-3.93634	4.44136	-0.886291	0.375461	0.999883	0	7.39261	0	0	0
942	ENSG00000070047	57.8476	-0.483667	0.755733	-0.639997	0.522175	0.999883	126.094	32.7387	37.528	51.2388	41.6388
943	ENSG00000070061	20.4781	0.675228	1.13935	0.592644	0.55342	0.999883	2.89871	15.8413	30.4472	15.9017	37.3014
944	ENSG00000070081	389.38	0.262748	0.345302	0.760923	0.446703	0.999883	346.396	354.845	380.236	462.916	402.509
945	ENSG00000070159	4.44072	1.37836	2.2875	0.602562	0.5468	0.999883	0	7.39261	0.708075	12.368	1.73495
946	ENSG00000070214	89.3392	-0.148065	0.58738	-0.252078	0.800981	0.999883	131.891	55.9726	91.3417	99.8273	67.6631
947	ENSG00000070269	8.85023	-1.64033	1.98407	-0.826748	0.40838	0.999883	14.4936	0	21.9503	0	7.80728
948	ENSG00000070366	16.7473	-0.129645	1.10111	-0.11774	0.906274	0.999883	27.5378	14.7852	9.91305	15.0183	16.482
949	ENSG00000070367	94.7555	0.382355	0.598906	0.638422	0.523199	0.999883	59.4236	128.843	65.1429	145.765	74.6029
950	ENSG00000070371	5.39357	-1.16581	2.12842	-0.547733	0.583875	0.999883	11.5948	0	9.20497	5.30056	0.867475
951	ENSG00000070404	4.12403	1.59907	2.26047	0.707407	0.479313	0.999883	0	3.16826	3.54037	1.76685	12.1447
952	ENSG00000070413	47.0963	-0.0488215	0.701175	-0.0696281	0.94449	0.999883	63.7716	46.4679	33.2795	48.5885	43.3738
953	ENSG00000070423	86.9255	-0.197418	0.556486	-0.354759	0.72277	0.999883	107.252	103.497	64.4348	86.5759	72.8679
954	ENSG00000070444	145.684	0.232669	0.463697	0.50177	0.615829	0.999883	146.385	160.525	101.963	161.667	157.88
955	ENSG00000070476	7.72971	-2.39661	1.87023	-1.28145	0.200036	0.999883	0	13.7291	20.5342	2.65028	1.73495
956	ENSG00000070495	25.242	0.421289	0.938433	0.448928	0.653483	0.999883	15.9429	20.0657	30.4472	42.4045	17.3495
957	ENSG00000070501	12.8067	-0.213803	1.57378	-0.135853	0.891937	0.999883	0	26.4022	14.1615	2.65028	20.8194
958	ENSG00000070540	27.5713	1.14073	0.941284	1.21188	0.225557	0.999883	21.7403	6.33653	27.6149	34.4537	47.7111
959	ENSG00000070610	12.2265	-1.04952	1.26747	-0.828039	0.407648	0.999883	11.5948	16.8974	17.7019	10.6011	4.33738
960	ENSG00000070614	484.817	-0.332157	0.435263	-0.763119	0.445392	0.999883	750.766	568.175	266.944	444.364	393.834
961	ENSG00000070718	30.8855	0.00722667	0.884991	0.00816581	0.993485	0.999883	39.1326	15.8413	37.528	18.552	43.3738
962	ENSG00000070756	1236.4	0.232418	0.304532	0.763198	0.445345	0.999883	1118.9	1334.89	1013.26	1428.5	1286.47
963	ENSG00000070759	1.97755	-1.66169	3.17258	-0.523767	0.60044	0.999883	0	1.05609	7.08075	0.883427	0.867475
964	ENSG00000070761	10.5727	0.273858	1.65653	0.16532	0.868692	0.999883	0	26.4022	2.8323	11.4846	12.1447
965	ENSG00000070770	44.645	-0.286121	0.698071	-0.409874	0.681899	0.999883	57.9742	43.2996	43.1926	37.9874	40.7713
966	ENSG00000070778	12.9031	-0.0587881	1.57401	-0.0373492	0.970207	0.999883	8.69613	24.29	6.37267	0	25.1568
967	ENSG00000070785	105.936	-0.551851	0.601221	-0.917883	0.35868	0.999883	159.429	49.6361	155.068	88.3427	77.2053
968	ENSG00000070808	5.31831	-2.13015	2.06052	-1.03379	0.301233	0.999883	4.34807	9.50479	9.20497	3.53371	0
969	ENSG00000070814	99.1133	1.10255	0.574943	1.91767	0.0551534	0.999883	39.1326	73.9261	89.9255	109.545	183.037
970	ENSG00000070831	50.8289	-0.514546	0.762503	-0.674812	0.499795	0.999883	21.7403	65.4774	85.6771	31.8034	49.4461
971	ENSG00000070882	61.3227	0.651926	0.653945	0.996912	0.318807	0.999883	30.4365	46.4679	72.2236	74.2079	83.2776
972	ENSG00000070950	28.9065	-1.19622	0.943832	-1.26741	0.205009	0.999883	31.8858	51.7483	28.323	26.5028	6.07233
973	ENSG00000070961	1568.04	0.0389993	0.361051	0.108016	0.913983	0.999883	1065.28	1366.58	2219.81	1473.56	1715
974	ENSG00000071051	18.8447	-0.84801	1.12423	-0.754304	0.450667	0.999883	15.9429	44.3557	8.4969	15.0183	10.4097
975	ENSG00000071054	3119.64	-0.198755	0.353449	-0.56233	0.573891	0.999883	4077.04	3731.16	2059.79	3296.95	2433.27
976	ENSG00000071082	334.265	0.380097	0.382161	0.994599	0.319931	0.999883	255.087	374.911	264.82	342.77	433.738
977	ENSG00000071127	880.681	-0.369543	0.429893	-0.859615	0.390001	0.999883	1329.06	1112.06	464.497	894.028	603.763
978	ENSG00000071189	22.2742	-0.0114675	0.98079	-0.0116921	0.990671	0.999883	14.4936	16.8974	35.4037	18.552	26.0243
979	ENSG00000071205	85.95	-0.250676	0.551302	-0.454698	0.649326	0.999883	114.499	89.7674	71.5156	71.5576	82.4101
980	ENSG00000071242	46.3511	-0.0183918	0.717622	-0.0256289	0.979553	0.999883	52.1768	58.0848	29.7391	37.1039	54.6509
981	ENSG00000071243	46.9933	-1.09169	0.794852	-1.37345	0.169612	0.999883	53.6262	99.2722	26.1988	19.4354	36.434
982	ENSG00000071282	6.06918	4.65261	2.16035	2.15364	0.0312685	0.999883	0	0	1.41615	16.7851	12.1447
983	ENSG00000071537	201.76	-0.202075	0.433228	-0.46644	0.640901	0.999883	153.632	260.854	223.752	200.538	170.025
984	ENSG00000071539	6.22756	1.07105	2.15454	0.497115	0.619108	0.999883	0	0	12.7453	9.7177	8.67475
985	ENSG00000071553	136.136	-0.445351	0.500841	-0.889205	0.373893	0.999883	159.429	120.394	177.019	145.765	78.0728
986	ENSG00000071564	30.368	-0.141958	1.0043	-0.141351	0.887593	0.999883	7.24678	21.1218	65.851	20.3188	37.3014
987	ENSG00000071575	276.108	-0.475387	0.508621	-0.934659	0.349964	0.999883	355.092	431.94	146.572	298.598	148.338
988	ENSG00000071626	283.584	-0.706916	0.436345	-1.62008	0.105214	0.999883	430.459	349.565	227.292	256.194	154.411
989	ENSG00000071655	108.089	-1.28585	0.576807	-2.22926	0.0257967	0.999883	128.993	79.2066	215.963	50.3554	65.9281
990	ENSG00000071794	70.6993	-0.517624	0.633396	-0.81722	0.413803	0.999883	63.7716	117.226	60.1864	70.6742	41.6388
991	ENSG00000071859	108.562	-0.139351	0.618691	-0.225235	0.821797	0.999883	42.0313	144.684	150.82	78.625	126.651
992	ENSG00000071889	37.8738	-0.339453	0.814842	-0.416588	0.67698	0.999883	17.3923	47.5239	58.7702	34.4537	31.2291
993	ENSG00000071894	24.4323	-1.75718	1.09556	-1.60391	0.108734	0.999883	52.1768	5.28044	44.6087	7.95084	12.1447
994	ENSG00000071909	2.29958	-0.126987	3.50547	-0.0362253	0.971103	0.999883	0	0	7.08075	4.41714	0
995	ENSG00000071967	20.0121	-1.63946	1.09403	-1.49855	0.133991	0.999883	52.1768	12.6731	17.7019	8.83427	8.67475
996	ENSG00000071994	36.3396	-0.763172	0.863724	-0.883584	0.376921	0.999883	73.9171	32.7387	24.0745	36.2205	14.7471
997	ENSG00000072041	9.13164	-5.09895	2.33863	-2.18032	0.029234	0.999883	7.24678	0	37.528	0.883427	0
998	ENSG00000072042	230.528	-0.625829	0.480345	-1.30287	0.192618	0.999883	188.416	216.498	399.354	124.563	223.809
999	ENSG00000072062	236.396	-0.389918	0.504097	-0.773498	0.439228	0.999883	369.586	299.929	114.708	217.323	180.435
1000	ENSG00000072071	10.5953	-1.29421	1.8918	-0.684114	0.493903	0.999883	27.5378	0	14.1615	0	11.2772
1001	ENSG00000072110	2123.85	-0.18434	0.354083	-0.520613	0.602636	0.999883	2634.93	2606.42	1452.26	2322.53	1603.09
1002	ENSG00000072121	20.4102	0.177713	1.1033	0.161074	0.872035	0.999883	15.9429	11.617	30.4472	37.1039	6.9398
1003	ENSG00000072133	9.65945	1.33893	1.43348	0.934042	0.350282	0.999883	2.89871	4.22435	10.6211	10.6011	19.9519
1004	ENSG00000072134	37.0003	-1.42344	0.83413	-1.70649	0.0879162	0.999883	73.9171	45.4118	29.0311	11.4846	25.1568
1005	ENSG00000072135	31.8219	0.706454	0.915164	0.771943	0.440148	0.999883	26.0884	7.39261	42.4845	40.6377	42.5063
1006	ENSG00000072163	60.9695	0.378505	0.685428	0.552217	0.5808	0.999883	76.8158	62.3092	24.7826	70.6742	70.2655
1007	ENSG00000072195	13.1607	0.159564	1.1922	0.133841	0.893528	0.999883	15.9429	12.6731	9.20497	12.368	15.6146
1008	ENSG00000072274	57.0204	0.545654	0.645858	0.844851	0.398194	0.999883	57.9742	48.58	38.236	83.9256	56.3859
1009	ENSG00000072310	3.08282	1.59847	2.77404	0.576224	0.564463	0.999883	0	0	4.95652	2.65028	7.80728
1010	ENSG00000072364	172.084	-0.0429996	0.459811	-0.0935156	0.925494	0.999883	155.081	214.386	152.944	127.214	210.796
1011	ENSG00000072401	18.0008	0.345569	1.0827	0.319173	0.749596	0.999883	24.639	15.8413	8.4969	14.1348	26.8917
1012	ENSG00000072415	121.777	0.779573	0.479366	1.62626	0.103895	0.999883	111.6	81.3187	91.3417	154.6	170.025
1013	ENSG00000072422	14.1994	0.385796	1.46413	0.263499	0.792166	0.999883	11.5948	0	26.1988	13.2514	19.9519
1014	ENSG00000072501	612.908	0.141193	0.320388	0.440693	0.659436	0.999883	617.425	600.914	548.05	695.257	602.895
1015	ENSG00000072506	170.878	0.118128	0.461963	0.255708	0.798176	0.999883	139.138	227.059	129.578	163.434	195.182
1016	ENSG00000072518	106.068	-0.573649	0.567817	-1.01027	0.312365	0.999883	107.252	184.815	74.3479	94.5267	69.398
1017	ENSG00000072571	45.6987	0.989559	0.69286	1.42822	0.153227	0.999883	26.0884	35.907	36.1118	62.7233	67.6631
1018	ENSG00000072609	17.4289	0.352758	1.1869	0.297211	0.766306	0.999883	5.79742	32.7387	8.4969	11.4846	28.6267
1019	ENSG00000072682	81.6025	-0.04652	0.594969	-0.0781889	0.937678	0.999883	111.6	86.5992	50.2733	91.8764	67.6631
1020	ENSG00000072756	28.0815	0.0130241	1.00275	0.0129884	0.989637	0.999883	21.7403	7.39261	54.5218	20.3188	36.434
1021	ENSG00000072778	59.0826	0.676198	0.619713	1.09115	0.275208	0.999883	50.7274	50.6922	41.7764	70.6742	81.5427
1022	ENSG00000072786	60.5777	-0.451759	0.662428	-0.681975	0.495255	0.999883	55.0755	61.2531	87.0932	31.8034	67.6631
1023	ENSG00000072803	44.5186	0.58168	0.78364	0.742279	0.457918	0.999883	37.6832	57.0287	16.9938	39.7542	71.133
1024	ENSG00000072818	10.2948	-1.89428	1.64619	-1.15071	0.249852	0.999883	21.7403	4.22435	17.7019	0	7.80728
1025	ENSG00000072840	15.9229	-1.16229	1.58749	-0.732155	0.464074	0.999883	37.6832	1.05609	22.6584	0	18.217
1026	ENSG00000072849	91.6569	-0.244014	0.577756	-0.422348	0.672771	0.999883	97.1068	85.5431	110.46	115.729	49.4461
1027	ENSG00000072864	9.66839	-1.26684	1.55684	-0.813729	0.4158	0.999883	1.44936	22.1778	14.1615	7.95084	2.60243
1028	ENSG00000072952	53.5916	0.51176	0.713806	0.716946	0.473408	0.999883	46.3794	68.6457	22.6584	56.5393	73.7354
1029	ENSG00000072954	6.08729	-5.96365	2.97424	-2.0051	0.0449521	0.999883	30.4365	0	0	0	0
1030	ENSG00000072958	91.0749	-0.0587148	0.539792	-0.108773	0.913382	0.999883	81.1639	119.338	77.1802	88.3427	89.35
1031	ENSG00000073008	153.226	-0.12227	0.475026	-0.257397	0.796872	0.999883	128.993	126.731	218.795	151.949	139.664
1032	ENSG00000073050	77.2414	0.79197	0.629557	1.25798	0.2084	0.999883	91.3094	43.2996	45.3168	134.281	72.0004
1033	ENSG00000073060	6.24769	-1.45453	2.00886	-0.724058	0.46903	0.999883	0	11.617	13.4534	5.30056	0.867475
1034	ENSG00000073169	9.12548	0.662553	1.93914	0.341674	0.732596	0.999883	0	0	21.9503	14.1348	9.54223
1035	ENSG00000073331	11.2786	-0.0457345	1.35774	-0.0336843	0.973129	0.999883	23.1897	6.33653	4.95652	12.368	9.54223
1036	ENSG00000073417	20.6337	1.02982	1.11379	0.924609	0.355169	0.999883	2.89871	26.4022	14.1615	39.7542	19.9519
1037	ENSG00000073464	21.7177	0.612404	1.34757	0.454452	0.649504	0.999883	44.93	0	9.20497	37.1039	17.3495
1038	ENSG00000073536	7.37317	0.567328	1.5436	0.367536	0.71322	0.999883	4.34807	6.33653	7.78882	9.7177	8.67475
1039	ENSG00000073578	12.5972	1.89331	1.73623	1.09048	0.275504	0.999883	0	0	17.7019	9.7177	35.5665
1040	ENSG00000073584	13.4525	1.13334	1.48533	0.76302	0.445452	0.999883	5.79742	0	21.2422	17.6685	22.5544
1041	ENSG00000073605	3.58022	-5.21188	3.0586	-1.70401	0.0883794	0.999883	8.69613	0	9.20497	0	0
1042	ENSG00000073614	302.948	0.118103	0.378507	0.312023	0.755023	0.999883	302.915	236.564	339.168	301.249	334.845
1043	ENSG00000073711	83.1978	-0.731014	0.561646	-1.30156	0.193068	0.999883	127.543	80.2627	89.2174	54.7725	64.1932
1044	ENSG00000073712	209.828	0.951587	0.467003	2.03765	0.0415852	0.999883	127.543	104.553	225.168	254.427	337.448
1045	ENSG00000073737	5.82849	0.498749	1.97633	0.252361	0.800762	0.999883	11.5948	0	3.54037	7.06742	6.9398
1046	ENSG00000073792	528.246	-0.332857	0.343476	-0.969083	0.332504	0.999883	668.153	494.249	565.044	402.843	510.943
1047	ENSG00000073803	123.631	0.272391	0.542097	0.502477	0.615332	0.999883	79.7146	81.3187	180.559	135.164	141.398
1048	ENSG00000073905	49.168	-0.91255	0.81688	-1.11712	0.263944	0.999883	57.9742	100.328	23.3665	46.8216	17.3495
1049	ENSG00000073910	21.7718	-0.658844	1.09956	-0.599191	0.549046	0.999883	42.0313	10.5609	24.0745	5.30056	26.8917
1050	ENSG00000073921	109.502	0.0062317	0.495183	0.0125846	0.989959	0.999883	95.6575	106.665	125.329	117.496	102.362
1051	ENSG00000073969	17.4939	-0.0436693	1.06799	-0.0408891	0.967384	0.999883	26.0884	13.7291	13.4534	20.3188	13.8796
1052	ENSG00000074047	4.90096	-0.525311	2.21034	-0.237661	0.812144	0.999883	0	1.05609	15.5776	3.53371	4.33738
1053	ENSG00000074054	30.7725	-0.68517	0.920401	-0.744425	0.456619	0.999883	18.8416	35.907	53.8137	10.6011	34.699
1054	ENSG00000074071	52.8779	0.372189	0.788491	0.472027	0.636908	0.999883	14.4936	49.6361	77.1802	42.4045	80.6752
1055	ENSG00000074181	11.4423	2.66262	1.49481	1.78124	0.0748735	0.999883	0	4.22435	6.37267	35.3371	11.2772
1056	ENSG00000074201	69.826	-0.242392	0.632827	-0.38303	0.701697	0.999883	52.1768	113.001	58.0621	53.8891	72.0004
1057	ENSG00000074211	1.57657	-0.435737	4.08821	-0.106584	0.915119	0.999883	0	5.28044	0	0	2.60243
1058	ENSG00000074266	10.8269	2.55461	1.41456	1.80595	0.0709267	0.999883	5.79742	1.05609	4.24845	29.1531	13.8796
1059	ENSG00000074319	51.8648	0.619063	0.653704	0.947007	0.343635	0.999883	36.2339	48.58	43.1926	66.257	65.0606
1060	ENSG00000074356	81.007	-0.505976	0.561944	-0.900404	0.367905	0.999883	69.5691	102.44	103.379	69.7908	59.8558
1061	ENSG00000074370	11.4883	-0.820325	1.5816	-0.518667	0.603993	0.999883	0	27.4583	14.1615	11.4846	4.33738
1062	ENSG00000074410	50.4904	0.338328	0.659599	0.512929	0.608001	0.999883	42.0313	51.7483	43.1926	53.8891	61.5907
1063	ENSG00000074416	489.729	-0.80763	0.374289	-2.15777	0.0309458	0.999883	427.56	568.175	776.758	357.788	318.363
1064	ENSG00000074527	4.12349	1.08041	2.52313	0.428202	0.668504	0.999883	0	4.22435	4.24845	0	12.1447
1065	ENSG00000074582	20.7947	-0.515838	1.40046	-0.368335	0.712624	0.999883	36.2339	0	34.6957	4.41714	28.6267
1066	ENSG00000074590	485.312	-0.45375	0.446297	-1.0167	0.309297	0.999883	775.405	587.185	270.485	466.45	327.038
1067	ENSG00000074603	42.1857	-1.10478	0.808187	-1.36698	0.171631	0.999883	43.4807	33.7948	83.5528	36.2205	13.8796
1068	ENSG00000074621	21.9206	1.15485	1.31811	0.876141	0.380953	0.999883	0	39.0752	4.95652	28.2697	37.3014
1069	ENSG00000074657	72.0178	0.0717602	0.677125	0.105978	0.9156	0.999883	44.93	119.338	47.441	50.3554	98.0247
1070	ENSG00000074660	1.3707	-3.80655	4.39953	-0.865218	0.386919	0.999883	5.79742	1.05609	0	0	0
1071	ENSG00000074695	724.725	0.75123	0.361885	2.07588	0.0379053	0.999883	392.775	559.726	753.392	994.739	922.994
1072	ENSG00000074696	61.5683	0.366148	0.647276	0.565675	0.571615	0.999883	50.7274	35.907	78.5963	67.1405	75.4703
1073	ENSG00000074755	8.80611	-0.11554	1.73635	-0.0665418	0.946946	0.999883	21.7403	0	5.6646	7.95084	8.67475
1074	ENSG00000074800	1104.36	0.374201	0.315582	1.18575	0.235723	0.999883	966.72	862.824	1132.21	1112.23	1447.82
1075	ENSG00000074842	51.5708	-0.236618	0.736782	-0.32115	0.748097	0.999883	24.639	51.7483	87.8013	46.8216	46.8437
1076	ENSG00000074935	13.2198	-0.437666	1.2564	-0.348349	0.727578	0.999883	5.79742	26.4022	12.0373	9.7177	12.1447
1077	ENSG00000074964	105.168	-0.153151	0.683473	-0.224077	0.822697	0.999883	147.834	153.133	28.323	123.68	72.8679
1078	ENSG00000075089	21.2916	1.04932	1.02773	1.02101	0.307252	0.999883	5.79742	13.7291	24.7826	30.92	31.2291
1079	ENSG00000075131	8.98991	1.11506	1.48173	0.75254	0.451726	0.999883	10.1455	6.33653	2.12422	17.6685	8.67475
1080	ENSG00000075142	15.5191	0.494641	1.29692	0.381397	0.702909	0.999883	4.34807	8.4487	26.9068	32.6868	5.20485
1081	ENSG00000075151	256.736	0.153458	0.407081	0.376971	0.706195	0.999883	198.562	233.395	304.472	233.225	314.026
1082	ENSG00000075188	6.31521	-1.49987	1.86669	-0.803493	0.42169	0.999883	1.44936	6.33653	17.7019	0.883427	5.20485
1083	ENSG00000075213	397.493	-0.543496	0.390664	-1.39121	0.164161	0.999883	368.136	371.743	623.106	282.697	341.785
1084	ENSG00000075218	57.5448	0.764219	0.800789	0.954332	0.339915	0.999883	11.5948	45.4118	77.1802	47.7051	105.832
1085	ENSG00000075223	52.1592	0.52549	0.883851	0.594546	0.552147	0.999883	5.79742	86.5992	40.3603	76.8582	51.181
1086	ENSG00000075234	6.44325	2.65887	1.83415	1.44965	0.147157	0.999883	0	3.16826	2.8323	10.6011	15.6146
1087	ENSG00000075239	30.322	0.315937	0.882308	0.35808	0.720283	0.999883	24.639	14.7852	43.1926	25.6194	43.3738
1088	ENSG00000075275	5.32222	-0.0558533	2.38616	-0.0234072	0.981325	0.999883	0	14.7852	1.41615	0	10.4097
1089	ENSG00000075292	149.815	-0.160719	0.511992	-0.31391	0.753589	0.999883	91.3094	191.152	186.224	106.895	173.495
1090	ENSG00000075303	1.04735	3.79271	4.368	0.868295	0.385233	0.999883	0	0	0	1.76685	3.4699
1091	ENSG00000075336	80.2983	-0.415466	0.563924	-0.736741	0.46128	0.999883	101.455	74.9822	91.3417	54.7725	78.9402
1092	ENSG00000075340	51.9159	-0.229132	0.769092	-0.297925	0.76576	0.999883	52.1768	90.8235	22.6584	60.9565	32.9641
1093	ENSG00000075391	83.1441	-0.421349	0.563642	-0.747547	0.454734	0.999883	68.1197	119.338	89.9255	70.6742	67.6631
1094	ENSG00000075399	3.30676	0.121369	2.25273	0.0538764	0.957034	0.999883	1.44936	5.28044	2.8323	1.76685	5.20485
1095	ENSG00000075407	109.054	0.0122605	0.613387	0.0199882	0.984053	0.999883	95.6575	74.9822	155.068	53.0056	166.555
1096	ENSG00000075413	334.343	-0.0150075	0.423782	-0.0354133	0.97175	0.999883	459.446	241.844	306.596	251.777	412.051
1097	ENSG00000075415	415.44	-0.102774	0.420202	-0.244584	0.806779	0.999883	527.565	492.137	262.696	491.186	303.616
1098	ENSG00000075420	217.356	0.446434	0.421119	1.06011	0.289093	0.999883	152.182	170.03	246.41	255.31	262.845
1099	ENSG00000075426	97.9386	-0.667337	0.565064	-1.18099	0.237605	0.999883	114.499	160.525	70.0994	79.5084	65.0606
1100	ENSG00000075539	114.589	-0.398222	0.518565	-0.76793	0.442529	0.999883	166.676	117.226	97.0063	113.962	78.0728
1101	ENSG00000075568	99.2497	0.647295	0.702686	0.921173	0.35696	0.999883	23.1897	57.0287	161.441	119.263	135.326
1102	ENSG00000075618	189.528	0.122236	0.463274	0.263852	0.791894	0.999883	136.239	196.432	215.963	142.232	256.773
1103	ENSG00000075624	1530.33	0.0493748	0.33525	0.147278	0.882913	0.999883	1236.3	1246.18	2044.21	1601.65	1523.29
1104	ENSG00000075643	12.9261	1.12306	1.27888	0.878158	0.379858	0.999883	8.69613	8.4487	9.20497	6.18399	32.0966
1105	ENSG00000075651	17.432	-0.551142	1.06073	-0.51959	0.60335	0.999883	27.5378	16.8974	15.5776	14.1348	13.0121
1106	ENSG00000075702	28.4805	-0.130487	0.936243	-0.139373	0.889155	0.999883	52.1768	23.2339	13.4534	34.4537	19.0845
1107	ENSG00000075711	83.2788	-0.492436	0.541989	-0.908573	0.363576	0.999883	98.5562	85.5431	98.4224	63.6068	70.2655
1108	ENSG00000075785	679.236	-0.233543	0.325647	-0.717166	0.473272	0.999883	814.538	720.252	633.019	674.055	554.317
1109	ENSG00000075790	1.94354	4.68424	4.07465	1.1496	0.250307	0.999883	0	0	0	9.7177	0
1110	ENSG00000075826	2.0291	-4.37433	4.18104	-1.04623	0.295454	0.999883	10.1455	0	0	0	0
1111	ENSG00000075856	73.9555	0.621951	0.714489	0.870485	0.384036	0.999883	47.8287	22.1778	111.876	76.8582	111.037
1112	ENSG00000075884	2.89975	1.48084	3.19343	0.463715	0.642852	0.999883	0	0	4.95652	0	9.54223
1113	ENSG00000075914	17.0064	0.114862	1.41914	0.0809377	0.935491	0.999883	20.291	0	29.0311	7.95084	27.7592
1114	ENSG00000075945	114.36	-0.400416	0.587246	-0.681853	0.495332	0.999883	198.562	118.282	63.7267	117.496	73.7354
1115	ENSG00000075975	1.73495	4.52098	4.2675	1.0594	0.289418	0.999883	0	0	0	0	8.67475
1116	ENSG00000076003	15.6221	1.12749	1.14319	0.986271	0.324	0.999883	5.79742	11.617	14.1615	30.92	15.6146
1117	ENSG00000076043	100.64	-0.16484	0.521641	-0.316002	0.752001	0.999883	107.252	127.787	80.7205	99.8273	87.615
1118	ENSG00000076053	5.97879	-0.326303	1.99292	-0.163731	0.869943	0.999883	2.89871	9.50479	7.08075	0	10.4097
1119	ENSG00000076067	31.3224	0.846755	0.887271	0.954337	0.339913	0.999883	17.3923	11.617	41.7764	45.0548	40.7713
1120	ENSG00000076108	267.575	0.431992	0.433523	0.99647	0.319022	0.999883	166.676	293.592	243.578	234.992	399.039
1121	ENSG00000076201	134.786	-0.655915	0.521678	-1.25732	0.208639	0.999883	237.694	130.955	105.503	110.428	89.35
1122	ENSG00000076242	8.14864	-0.104025	1.68219	-0.0618392	0.950691	0.999883	2.89871	15.8413	6.37267	0.883427	14.7471
1123	ENSG00000076248	16.8901	0.92434	1.09244	0.846126	0.397483	0.999883	10.1455	17.9535	9.20497	16.7851	30.3616
1124	ENSG00000076321	29.4228	0.619613	1.09615	0.565264	0.571894	0.999883	34.7845	1.05609	36.8199	39.7542	34.699
1125	ENSG00000076382	21.7519	-0.451088	1.09801	-0.410825	0.681201	0.999883	17.3923	38.0192	17.7019	4.41714	31.2291
1126	ENSG00000076513	187.051	0.0993231	0.424809	0.233806	0.815135	0.999883	149.284	184.815	211.006	180.219	209.929
1127	ENSG00000076555	1.04097	3.78418	4.36823	0.866296	0.386328	0.999883	0	0	0	0	5.20485
1128	ENSG00000076604	2.16618	2.51806	3.20374	0.785974	0.431883	0.999883	0	0	2.12422	1.76685	6.9398
1129	ENSG00000076641	48.9337	-0.503106	0.731522	-0.687753	0.491608	0.999883	34.7845	59.1409	72.2236	24.736	53.7835
1130	ENSG00000076650	49.7281	-0.174913	0.692381	-0.252626	0.800558	0.999883	66.6704	55.9726	33.9876	51.2388	40.7713
1131	ENSG00000076685	13.002	0.0276261	1.39236	0.0198411	0.98417	0.999883	17.3923	20.0657	1.41615	6.18399	19.9519
1132	ENSG00000076716	19.905	0.523497	1.15576	0.452948	0.650586	0.999883	27.5378	20.0657	3.54037	37.1039	11.2772
1133	ENSG00000076770	4.92722	2.45874	2.33491	1.05304	0.292325	0.999883	0	5.28044	0	15.0183	4.33738
1134	ENSG00000076864	1.66164	2.05473	3.96791	0.517837	0.604572	0.999883	0	0	2.12422	6.18399	0
1135	ENSG00000076924	2.18931	-2.93089	3.39958	-0.862133	0.388614	0.999883	7.24678	0	2.8323	0	0.867475
1136	ENSG00000076928	33.9363	0.164171	0.784787	0.209191	0.834299	0.999883	30.4365	36.9631	29.7391	30.0365	42.5063
1137	ENSG00000076984	51.6919	0.709373	0.762932	0.929799	0.352475	0.999883	14.4936	41.1874	67.2671	58.3062	77.2053
1138	ENSG00000077044	31.276	-0.42081	1.11281	-0.378152	0.705318	0.999883	2.89871	55.9726	45.3168	7.95084	44.2412
1139	ENSG00000077063	10.1065	-0.11202	1.38363	-0.0809609	0.935473	0.999883	11.5948	14.7852	4.95652	6.18399	13.0121
1140	ENSG00000077092	2.89871	-4.89014	3.69391	-1.32384	0.185557	0.999883	14.4936	0	0	0	0
1141	ENSG00000077097	379.265	-0.0814615	0.39902	-0.204154	0.838233	0.999883	486.983	428.772	248.534	378.107	353.93
1142	ENSG00000077147	410.995	-0.462761	0.361814	-1.279	0.200896	0.999883	462.344	557.614	365.367	333.935	335.713
1143	ENSG00000077150	40.8682	-0.735551	0.77993	-0.943098	0.345631	0.999883	33.3352	70.7579	41.7764	19.4354	39.0364
1144	ENSG00000077152	3.41785	1.5998	2.4392	0.655873	0.511906	0.999883	4.34807	0	1.41615	2.65028	8.67475
1145	ENSG00000077157	16.7301	1.76038	1.47468	1.19374	0.23258	0.999883	0	1.05609	24.0745	22.0857	36.434
1146	ENSG00000077232	137.483	0.183305	0.477026	0.384266	0.700782	0.999883	107.252	154.189	129.578	176.685	119.712
1147	ENSG00000077235	130.874	-0.0395604	0.495725	-0.0798032	0.936394	0.999883	163.777	133.067	100.547	155.483	101.495
1148	ENSG00000077238	21.7808	1.45387	1.0796	1.34668	0.178083	0.999883	5.79742	5.28044	26.9068	36.2205	34.699
1149	ENSG00000077254	130.961	0.263834	0.479822	0.549859	0.582416	0.999883	100.006	108.777	154.36	154.6	137.061
1150	ENSG00000077312	679.43	-0.321699	0.445403	-0.722265	0.470132	0.999883	1063.83	818.468	334.211	673.172	507.473
1151	ENSG00000077348	37.3001	-0.00976672	0.895688	-0.0109042	0.9913	0.999883	68.1197	23.2339	21.2422	57.4228	16.482
1152	ENSG00000077380	777.392	-0.449949	0.368323	-1.22162	0.221853	0.999883	1179.78	782.561	650.721	745.613	528.292
1153	ENSG00000077420	36.0473	0.137319	0.757135	0.181367	0.85608	0.999883	36.2339	33.7948	33.9876	41.5211	34.699
1154	ENSG00000077458	32.8049	-0.663891	0.900774	-0.737023	0.461109	0.999883	62.3223	24.29	29.0311	37.1039	11.2772
1155	ENSG00000077463	16.5518	1.77115	1.3694	1.29338	0.195879	0.999883	5.79742	0	19.118	32.6868	25.1568
1156	ENSG00000077514	32.5011	0.34526	0.872159	0.395868	0.692202	0.999883	46.3794	24.29	17.7019	22.0857	52.0485
1157	ENSG00000077549	221.124	0.291567	0.454702	0.641228	0.521375	0.999883	123.195	204.881	279.69	235.875	261.978
1158	ENSG00000077585	14.4979	0.826982	1.14624	0.721471	0.47062	0.999883	8.69613	9.50479	14.8696	21.2023	18.217
1159	ENSG00000077684	98.6728	-0.516539	0.711663	-0.72582	0.467949	0.999883	157.98	149.964	29.0311	109.545	46.8437
1160	ENSG00000077713	8.72125	-0.764875	1.46471	-0.522203	0.601529	0.999883	13.0442	12.6731	5.6646	4.41714	7.80728
1161	ENSG00000077721	20.2962	1.64865	1.21411	1.35791	0.174492	0.999883	5.79742	1.05609	25.4907	33.5702	35.5665
1162	ENSG00000077782	544.683	0.0848131	0.324916	0.261031	0.794069	0.999883	582.641	513.259	499.901	570.694	556.919
1163	ENSG00000077935	4.76094	5.97687	2.58895	2.30861	0.0209653	0.999883	0	0	0	21.2023	2.60243
1164	ENSG00000077942	309.009	0.491713	0.393374	1.24999	0.211304	0.999883	268.131	333.724	196.137	393.125	353.93
1165	ENSG00000077943	40.4347	-0.424428	0.87942	-0.482623	0.629363	0.999883	13.0442	35.907	85.6771	41.5211	26.0243
1166	ENSG00000078018	29.3143	-1.03969	1.08782	-0.955757	0.339195	0.999883	60.8729	44.3557	5.6646	6.18399	29.4942
1167	ENSG00000078043	33.9401	-0.182133	0.945718	-0.192587	0.847282	0.999883	7.24678	67.5896	31.8634	30.0365	32.9641
1168	ENSG00000078053	4.4428	-5.52915	2.85124	-1.93921	0.0524757	0.999883	0	15.8413	6.37267	0	0
1169	ENSG00000078061	51.0987	0.0421434	0.794994	0.053011	0.957723	0.999883	63.7716	71.814	16.2857	69.7908	33.8315
1170	ENSG00000078070	10.8314	1.28459	1.48157	0.867046	0.385917	0.999883	5.79742	8.4487	6.37267	31.8034	1.73495
1171	ENSG00000078098	19.6214	-0.401537	1.2749	-0.314956	0.752795	0.999883	5.79742	3.16826	55.9379	13.2514	19.9519
1172	ENSG00000078124	43.8807	0.830698	0.787195	1.05526	0.291305	0.999883	18.8416	24.29	56.646	43.2879	76.3378
1173	ENSG00000078140	141.162	-0.0924905	0.469047	-0.197188	0.84368	0.999883	157.98	109.833	166.398	148.416	123.181
1174	ENSG00000078142	45.6919	1.06126	0.696327	1.52409	0.127487	0.999883	34.7845	25.3461	35.4037	59.1896	73.7354
1175	ENSG00000078177	10.1671	-0.357538	1.36935	-0.261101	0.794015	0.999883	8.69613	12.6731	12.0373	4.41714	13.0121
1176	ENSG00000078237	29.0832	-1.27759	0.969846	-1.31732	0.187733	0.999883	28.9871	12.6731	72.2236	16.7851	14.7471
1177	ENSG00000078246	57.9012	0.120973	0.639959	0.189032	0.850067	0.999883	55.0755	69.7018	43.1926	53.0056	68.5305
1178	ENSG00000078269	93.0706	-0.476823	0.580446	-0.821478	0.411374	0.999883	72.4678	84.487	157.193	62.7233	88.4825
1179	ENSG00000078304	128.692	-0.5113	0.494437	-1.03411	0.301087	0.999883	111.6	135.179	191.18	90.993	114.507
1180	ENSG00000078328	7.44488	-1.29802	1.69336	-0.766534	0.443358	0.999883	17.3923	10.5609	1.41615	2.65028	5.20485
1181	ENSG00000078369	1599.39	-0.573851	0.379768	-1.51106	0.130774	0.999883	2365.35	2039.31	1119.47	1519.49	953.355
1182	ENSG00000078399	5.87471	2.56179	2.14006	1.19707	0.231281	0.999883	0	0	5.6646	15.9017	7.80728
1183	ENSG00000078401	173.311	-0.262877	0.590194	-0.445407	0.656025	0.999883	265.232	232.339	60.1864	190.82	117.977
1184	ENSG00000078403	78.4377	0.219136	0.638183	0.343374	0.731317	0.999883	121.746	60.197	39.6522	79.5084	91.0849
1185	ENSG00000078618	441.326	-0.0341897	0.343423	-0.0995556	0.920697	0.999883	424.661	476.295	435.466	487.652	382.557
1186	ENSG00000078668	159.095	0.0618516	0.590951	0.104665	0.916642	0.999883	288.422	110.889	70.8075	195.237	130.121
1187	ENSG00000078674	314.621	0.0772672	0.366567	0.210786	0.833054	0.999883	269.58	346.397	307.305	341.003	308.821
1188	ENSG00000078687	85.5719	-0.141962	0.536992	-0.264365	0.791499	0.999883	85.512	87.6553	93.4659	89.2261	72.0004
1189	ENSG00000078699	18.5489	0.963067	1.21573	0.792169	0.428262	0.999883	24.639	3.16826	12.7453	7.95084	44.2412
1190	ENSG00000078747	10.2302	1.17915	1.4614	0.806867	0.419743	0.999883	10.1455	1.05609	9.20497	21.2023	9.54223
1191	ENSG00000078804	6.95344	-1.90675	2.1632	-0.881446	0.378076	0.999883	23.1897	0	6.37267	0	5.20485
1192	ENSG00000078808	144.392	-0.626074	0.473813	-1.32135	0.186384	0.999883	159.429	127.787	216.671	114.846	103.23
1193	ENSG00000078900	1.67997	-0.538108	4.00472	-0.134368	0.893111	0.999883	5.79742	0	0	0	2.60243
1194	ENSG00000078902	101.972	-1.06575	0.540318	-1.97245	0.0485582	0.999883	127.543	89.7674	169.23	55.6559	67.6631
1195	ENSG00000078967	2.28307	1.71015	2.81912	0.606624	0.5441	0.999883	0	2.11218	1.41615	4.41714	3.4699
1196	ENSG00000079102	152.308	0.582235	0.475075	1.22556	0.220363	0.999883	162.328	122.506	97.0063	226.157	153.543
1197	ENSG00000079112	2.53461	-4.71386	3.85061	-1.22419	0.220882	0.999883	0	12.6731	0	0	0
1198	ENSG00000079134	16.2076	0.685384	1.21264	0.5652	0.571938	0.999883	18.8416	12.6731	7.78882	5.30056	36.434
1199	ENSG00000079150	34.8006	-0.50958	0.847174	-0.601506	0.547503	0.999883	42.0313	47.5239	29.0311	42.4045	13.0121
1200	ENSG00000079156	27.4447	-0.146114	0.877799	-0.166455	0.867799	0.999883	18.8416	39.0752	27.6149	28.2697	23.4218
1201	ENSG00000079215	7.08598	1.96593	2.08991	0.940679	0.346869	0.999883	10.1455	0	0	7.06742	18.217
1202	ENSG00000079246	320.643	-0.258555	0.392482	-0.658769	0.510044	0.999883	266.681	331.611	430.51	248.243	326.171
1203	ENSG00000079257	5.49582	-1.52924	2.30513	-0.663409	0.507069	0.999883	0	5.28044	16.9938	0	5.20485
1204	ENSG00000079263	23.2934	-1.31079	1.03928	-1.26125	0.20722	0.999883	36.2339	46.4679	9.20497	15.0183	9.54223
1205	ENSG00000079277	25.8224	1.39308	1.07998	1.28991	0.197081	0.999883	2.89871	13.7291	29.7391	18.552	64.1932
1206	ENSG00000079308	171.568	0.146295	0.549707	0.266132	0.790137	0.999883	271.029	143.628	80.0125	223.507	139.664
1207	ENSG00000079313	10.2431	1.58819	1.59144	0.997959	0.318299	0.999883	0	12.6731	4.24845	25.6194	8.67475
1208	ENSG00000079332	602.536	-0.136781	0.394795	-0.346461	0.728996	0.999883	726.127	765.663	384.485	673.172	463.232
1209	ENSG00000079335	3.25654	-0.486677	2.78773	-0.174579	0.861411	0.999883	5.79742	5.28044	0	0	5.20485
1210	ENSG00000079337	2.21023	-1.11347	3.60279	-0.309058	0.757277	0.999883	0	8.4487	0	0	2.60243
1211	ENSG00000079385	2.54294	-1.3493	3.09799	-0.43554	0.663171	0.999883	8.69613	0	1.41615	0	2.60243
1212	ENSG00000079387	53.3576	-0.70475	0.709506	-0.993298	0.320565	0.999883	36.2339	74.9822	77.8882	26.5028	51.181
1213	ENSG00000079432	628.084	-0.618392	0.388293	-1.59259	0.111252	0.999883	989.91	738.205	462.373	530.94	418.991
1214	ENSG00000079459	53.5568	-0.213987	0.765846	-0.279412	0.779928	0.999883	66.6704	19.0096	84.2609	37.9874	59.8558
1215	ENSG00000079462	310.176	-0.0404131	0.488721	-0.0826917	0.934097	0.999883	434.807	359.07	147.988	386.941	222.074
1216	ENSG00000079482	15.4968	1.06884	1.23281	0.86699	0.385948	0.999883	5.79742	17.9535	8.4969	7.06742	38.1689
1217	ENSG00000079616	23.6649	0.12284	0.958261	0.12819	0.897998	0.999883	20.291	12.6731	35.4037	28.2697	21.6869
1218	ENSG00000079691	30.8142	0.471402	0.890972	0.529087	0.596745	0.999883	44.93	24.29	11.3292	36.2205	37.3014
1219	ENSG00000079739	17.5097	-0.939079	1.43565	-0.654115	0.513038	0.999883	18.8416	0	46.0249	7.06742	15.6146
1220	ENSG00000079785	386.007	-0.136342	0.385724	-0.353471	0.723735	0.999883	381.18	304.153	515.479	414.327	314.894
1221	ENSG00000079805	65.7207	0.513393	0.628175	0.817278	0.41377	0.999883	52.1768	78.1505	38.236	71.5576	88.4825
1222	ENSG00000079819	165.284	0.394164	0.462088	0.853006	0.393656	0.999883	104.354	180.591	155.068	165.201	221.206
1223	ENSG00000079841	1.44936	-3.88495	4.44258	-0.874481	0.381856	0.999883	7.24678	0	0	0	0
1224	ENSG00000079931	32.3637	0.83935	0.832305	1.00846	0.313232	0.999883	13.0442	28.5144	31.8634	43.2879	45.1087
1225	ENSG00000079950	37.3315	-0.136828	0.995163	-0.137493	0.890641	0.999883	2.89871	57.0287	55.9379	29.1531	41.6388
1226	ENSG00000079974	19.0505	-0.679218	1.01218	-0.671048	0.50219	0.999883	18.8416	24.29	24.0745	15.9017	12.1447
1227	ENSG00000079999	36.4822	0.629441	0.757636	0.830795	0.406089	0.999883	28.9871	27.4583	33.2795	40.6377	52.0485
1228	ENSG00000080189	28.1938	-0.790311	0.987557	-0.800269	0.423555	0.999883	46.3794	22.1778	33.2795	5.30056	33.8315
1229	ENSG00000080200	38.0485	0.325369	0.78653	0.413676	0.679112	0.999883	27.5378	52.8044	23.3665	36.2205	50.3136
1230	ENSG00000080298	9.94942	-0.654317	1.57071	-0.416575	0.676989	0.999883	1.44936	28.5144	4.95652	4.41714	10.4097
1231	ENSG00000080345	269.02	-0.155836	0.410232	-0.379873	0.70404	0.999883	242.042	288.312	310.845	186.403	317.496
1232	ENSG00000080371	76.4027	-0.334922	0.631736	-0.530161	0.596	0.999883	100.006	99.2722	50.9814	42.4045	89.35
1233	ENSG00000080493	53.6402	-0.314011	0.701377	-0.447706	0.654366	0.999883	37.6832	92.9357	43.9006	47.7051	45.9762
1234	ENSG00000080503	1009.11	-0.0499679	0.368834	-0.135475	0.892236	0.999883	1245	1165.92	659.218	1161.71	813.692
1235	ENSG00000080546	19.071	-1.48991	1.06219	-1.40267	0.160714	0.999883	13.0442	28.5144	35.4037	9.7177	8.67475
1236	ENSG00000080561	18.5629	-1.03093	1.07864	-0.955767	0.33919	0.999883	17.3923	32.7387	19.8261	16.7851	6.07233
1237	ENSG00000080573	10.3174	0.750451	1.59125	0.471609	0.637206	0.999883	15.9429	0	8.4969	14.1348	13.0121
1238	ENSG00000080608	329.125	-0.151416	0.380205	-0.398249	0.690447	0.999883	334.801	399.201	294.559	256.194	360.87
1239	ENSG00000080709	6.19884	1.67022	1.92438	0.867927	0.385434	0.999883	7.24678	0	2.8323	5.30056	15.6146
1240	ENSG00000080802	35.0954	0.980221	0.836381	1.17198	0.241205	0.999883	28.9871	10.5609	36.1118	51.2388	48.5786
1241	ENSG00000080815	80.2906	0.0796508	0.567676	0.14031	0.888415	0.999883	65.221	66.5335	103.379	83.0422	83.2776
1242	ENSG00000080819	27.2753	0.471856	1.01635	0.464263	0.642459	0.999883	42.0313	22.1778	7.08075	49.4719	15.6146
1243	ENSG00000080822	8.88617	-0.799529	1.82902	-0.437134	0.662014	0.999883	0	24.29	7.78882	11.4846	0.867475
1244	ENSG00000080823	39.4716	0.101407	0.830661	0.12208	0.902836	0.999883	23.1897	32.7387	58.7702	61.8399	20.8194
1245	ENSG00000080824	7370	0.405768	0.294721	1.37679	0.168578	0.999883	5548.13	6033.43	7984.96	9075.45	8208.05
1246	ENSG00000080839	67.781	0.799631	0.640168	1.2491	0.21163	0.999883	76.8158	33.7948	46.7329	110.428	71.133
1247	ENSG00000080845	998.251	-0.305034	0.374501	-0.814506	0.415355	0.999883	1469.65	1060.31	713.031	1025.66	722.607
1248	ENSG00000080854	2.15073	0.0628459	3.61223	0.0173981	0.986119	0.999883	0	6.33653	0	4.41714	0
1249	ENSG00000080986	76.5769	0.62467	0.59227	1.0547	0.29156	0.999883	76.8158	72.87	39.6522	101.594	91.9524
1250	ENSG00000081014	17.828	0.615939	1.33139	0.46263	0.643629	0.999883	0	19.0096	24.7826	13.2514	32.0966
1251	ENSG00000081019	26.5698	1.26765	0.911825	1.39023	0.164458	0.999883	8.69613	22.1778	19.8261	33.5702	48.5786
1252	ENSG00000081026	14.0565	-0.340751	1.37801	-0.247279	0.804693	0.999883	1.44936	25.3461	19.118	4.41714	19.9519
1253	ENSG00000081041	1.59017	4.39471	4.35439	1.00926	0.31285	0.999883	0	0	0	7.95084	0
1254	ENSG00000081052	4.92781	-5.65783	3.14423	-1.79943	0.0719501	0.999883	24.639	0	0	0	0
1255	ENSG00000081059	62.995	-0.531856	0.751621	-0.707612	0.479186	0.999883	47.8287	28.5144	138.783	53.0056	46.8437
1256	ENSG00000081087	116.315	0.443681	0.659164	0.673097	0.500886	0.999883	52.1768	46.4679	205.342	143.999	133.591
1257	ENSG00000081154	111.379	0.0375477	0.588042	0.063852	0.949088	0.999883	89.86	104.553	135.95	54.7725	171.76
1258	ENSG00000081177	10.0242	1.67768	1.35727	1.23607	0.216432	0.999883	5.79742	5.28044	4.95652	14.1348	19.9519
1259	ENSG00000081181	2.10108	4.79698	3.48871	1.375	0.169132	0.999883	0	0	0	5.30056	5.20485
1260	ENSG00000081189	150.98	-0.427621	0.500633	-0.854161	0.393016	0.999883	191.315	215.442	98.4224	137.815	111.904
1261	ENSG00000081237	3.13914	0.575659	2.80246	0.205412	0.837251	0.999883	4.34807	0	3.54037	0	7.80728
1262	ENSG00000081307	29.1542	-0.319986	1.01363	-0.315683	0.752243	0.999883	30.4365	6.33653	58.0621	34.4537	16.482
1263	ENSG00000081320	24.7885	-1.02834	0.925309	-1.11134	0.26642	0.999883	20.291	41.1874	31.8634	13.2514	17.3495
1264	ENSG00000081377	23.3391	-0.627484	0.983657	-0.63791	0.523532	0.999883	44.93	12.6731	24.0745	17.6685	17.3495
1265	ENSG00000081386	3.59373	1.92089	2.95195	0.650717	0.515229	0.999883	0	0	4.95652	0	13.0121
1266	ENSG00000081665	17.8861	2.07723	1.29709	1.60145	0.109277	0.999883	15.9429	0	7.78882	35.3371	30.3616
1267	ENSG00000081692	32.7108	0.66239	0.819605	0.808182	0.418986	0.999883	31.8858	15.8413	31.8634	37.9874	45.9762
1268	ENSG00000081721	2.52906	0.091047	3.05503	0.0298024	0.976225	0.999883	0	7.39261	0	2.65028	2.60243
1269	ENSG00000081760	79.3098	0.00897674	0.669272	0.0134127	0.989299	0.999883	30.4365	86.5992	119.665	60.9565	98.8922
1270	ENSG00000081791	19.1577	0.171738	1.09633	0.156647	0.875523	0.999883	20.291	5.28044	29.0311	22.9691	18.217
1271	ENSG00000081803	1.69215	-4.13658	3.99523	-1.03538	0.300492	0.999883	0	6.33653	2.12422	0	0
1272	ENSG00000081870	4.97456	-0.111455	2.00178	-0.0556778	0.955598	0.999883	1.44936	1.05609	12.7453	4.41714	5.20485
1273	ENSG00000081913	25.8597	-0.68828	0.932484	-0.738115	0.460445	0.999883	44.93	16.8974	29.7391	23.8525	13.8796
1274	ENSG00000081923	43.9155	0.275389	0.714804	0.385266	0.700041	0.999883	50.7274	32.7387	38.236	39.7542	58.1208
1275	ENSG00000081985	1.83514	2.22521	3.45891	0.643326	0.520012	0.999883	0	0	2.12422	6.18399	0.867475
1276	ENSG00000082014	15.94	0.882189	1.21607	0.725442	0.468181	0.999883	5.79742	24.29	5.6646	31.8034	12.1447
1277	ENSG00000082068	27.8473	-0.193743	0.916753	-0.211336	0.832625	0.999883	14.4936	24.29	48.8572	22.9691	28.6267
1278	ENSG00000082126	3.82666	-5.30355	3.04328	-1.74271	0.0813839	0.999883	4.34807	14.7852	0	0	0
1279	ENSG00000082146	13.514	-0.76486	1.52921	-0.500166	0.616958	0.999883	5.79742	26.4022	16.2857	0	19.0845
1280	ENSG00000082153	112.895	-0.722112	0.57958	-1.24592	0.212793	0.999883	72.4678	115.114	213.839	94.5267	68.5305
1281	ENSG00000082175	4.48801	-0.0960042	2.4418	-0.039317	0.968638	0.999883	0	7.39261	6.37267	0	8.67475
1282	ENSG00000082196	7.09796	1.93814	1.79001	1.08276	0.278917	0.999883	5.79742	0	4.24845	15.9017	9.54223
1283	ENSG00000082212	38.4267	-0.951864	0.842918	-1.12925	0.258793	0.999883	37.6832	61.2531	43.9006	39.7542	9.54223
1284	ENSG00000082213	9.43436	1.44542	1.4714	0.982345	0.32593	0.999883	1.44936	9.50479	5.6646	10.6011	19.9519
1285	ENSG00000082258	19.2368	0.694382	1.1506	0.603496	0.546179	0.999883	4.34807	21.1218	20.5342	40.6377	9.54223
1286	ENSG00000082269	23.753	-0.281032	0.927681	-0.30294	0.761935	0.999883	28.9871	17.9535	29.7391	24.736	17.3495
1287	ENSG00000082293	6.55528	-4.6025	2.26522	-2.03182	0.0421723	0.999883	7.24678	21.1218	3.54037	0	0.867475
1288	ENSG00000082397	1.23494	0.113947	4.06924	0.028002	0.977661	0.999883	0	0	3.54037	1.76685	0.867475
1289	ENSG00000082438	13.2381	1.03387	1.48728	0.695137	0.486969	0.999883	8.69613	0	19.118	11.4846	26.8917
1290	ENSG00000082458	15.1381	0.370047	1.26223	0.293168	0.769394	0.999883	5.79742	30.6265	4.24845	17.6685	17.3495
1291	ENSG00000082482	88.8649	-0.554528	0.561914	-0.986856	0.323713	0.999883	104.354	127.787	73.6398	82.1587	56.3859
1292	ENSG00000082497	6.47247	-1.78807	1.89817	-0.942002	0.346192	0.999883	13.0442	8.4487	5.6646	0	5.20485
1293	ENSG00000082515	6.59819	0.791124	1.7189	0.460249	0.645337	0.999883	10.1455	1.05609	4.24845	10.6011	6.9398
1294	ENSG00000082516	37.9116	0.840813	0.768688	1.09383	0.27403	0.999883	30.4365	32.7387	23.3665	36.2205	66.7956
1295	ENSG00000082641	127.376	-0.185278	0.46732	-0.396469	0.691759	0.999883	118.847	139.404	143.031	124.563	111.037
1296	ENSG00000082701	408.911	0.0149189	0.440219	0.0338898	0.972965	0.999883	566.698	430.884	225.168	497.37	324.436
1297	ENSG00000082781	140.017	-0.416368	0.516263	-0.806505	0.419952	0.999883	84.0626	199.601	182.683	117.496	116.242
1298	ENSG00000082805	233.067	0.0163553	0.451628	0.0362141	0.971112	0.999883	146.385	242.9	305.888	191.704	278.46
1299	ENSG00000082898	164.746	-0.108783	0.449694	-0.241905	0.808854	0.999883	215.954	158.413	135.242	149.299	164.82
1300	ENSG00000082996	42.9524	0.278747	0.779017	0.357819	0.720479	0.999883	52.1768	30.6265	36.1118	71.5576	24.2893
1301	ENSG00000083093	5.20534	0.0172073	2.06901	0.00831665	0.993364	0.999883	0	12.6731	2.8323	6.18399	4.33738
1302	ENSG00000083097	47.3198	-0.479194	0.740092	-0.647479	0.517322	0.999883	57.9742	71.814	30.4472	49.4719	26.8917
1303	ENSG00000083099	273.514	0.699981	0.473211	1.47922	0.139083	0.999883	114.499	200.657	339.876	355.138	357.4
1304	ENSG00000083123	5.195	-0.621557	2.12801	-0.292084	0.770223	0.999883	7.24678	9.50479	1.41615	0	7.80728
1305	ENSG00000083168	187.918	0.258068	0.450323	0.573074	0.566595	0.999883	121.746	167.918	232.249	215.556	202.122
1306	ENSG00000083223	192.503	-0.157097	0.431402	-0.364154	0.715743	0.999883	181.169	163.694	257.031	178.452	182.17
1307	ENSG00000083290	18.6362	1.0113	1.21152	0.834737	0.403866	0.999883	17.3923	1.05609	21.2422	31.8034	21.6869
1308	ENSG00000083312	678.441	0.145252	0.331874	0.437671	0.661625	0.999883	589.888	566.063	795.876	741.195	699.185
1309	ENSG00000083444	158.9	0.143133	0.470809	0.304015	0.761117	0.999883	171.024	185.871	101.255	179.336	157.013
1310	ENSG00000083454	10.4658	-0.527149	1.59418	-0.33067	0.740894	0.999883	0	17.9535	17.7019	10.6011	6.07233
1311	ENSG00000083457	6.33886	0.861104	1.88058	0.457892	0.64703	0.999883	0	4.22435	9.91305	11.4846	6.07233
1312	ENSG00000083520	98.7624	0.0189294	0.521943	0.0362672	0.971069	0.999883	76.8158	99.2722	118.249	93.6433	105.832
1313	ENSG00000083535	20.1942	0.329265	1.15281	0.28562	0.775169	0.999883	2.89871	32.7387	19.118	13.2514	32.9641
1314	ENSG00000083544	8.60116	1.08673	1.65051	0.658423	0.510266	0.999883	0	10.5609	7.08075	11.4846	13.8796
1315	ENSG00000083635	10.3357	3.11035	1.55996	1.99387	0.0461664	0.999883	5.79742	0	2.12422	21.2023	22.5544
1316	ENSG00000083642	130.476	0.886089	0.466756	1.8984	0.0576433	0.999883	113.05	93.9918	85.6771	173.152	186.507
1317	ENSG00000083720	20.6959	0.29542	1.00616	0.29361	0.769056	0.999883	27.5378	19.0096	10.6211	18.552	27.7592
1318	ENSG00000083750	17.4628	0.50384	1.51851	0.331799	0.740041	0.999883	0	32.7387	12.0373	1.76685	40.7713
1319	ENSG00000083799	71.9223	0.559741	0.628629	0.890415	0.373243	0.999883	59.4236	33.7948	87.8013	90.1096	88.4825
1320	ENSG00000083812	11.2636	0.381112	1.52985	0.249117	0.803271	0.999883	0	17.9535	12.0373	16.7851	9.54223
1321	ENSG00000083814	1.57103	4.37766	3.95677	1.10637	0.268567	0.999883	0	0	0	2.65028	5.20485
1322	ENSG00000083817	2.02963	0.209407	3.31499	0.0631699	0.949631	0.999883	2.89871	0	2.8323	4.41714	0
1323	ENSG00000083828	2.95899	5.29117	3.06698	1.72521	0.08449	0.999883	0	0	0	2.65028	12.1447
1324	ENSG00000083844	51.8412	-0.663772	0.861271	-0.770688	0.440892	0.999883	11.5948	120.394	50.2733	33.5702	43.3738
1325	ENSG00000083845	1200.78	-0.0952201	0.297754	-0.319795	0.749124	0.999883	1272.53	1332.78	1091.85	1158.17	1148.54
1326	ENSG00000083857	128.256	0.635529	0.464232	1.36899	0.171002	0.999883	95.6575	113.001	106.211	157.25	169.158
1327	ENSG00000083896	476.912	0.123533	0.392706	0.314567	0.75309	0.999883	520.319	550.222	311.553	606.031	396.436
1328	ENSG00000083937	63.965	-0.874783	0.695377	-1.258	0.208392	0.999883	37.6832	67.5896	128.87	37.1039	48.5786
1329	ENSG00000084070	139.586	0.0356587	0.535007	0.0666509	0.94686	0.999883	157.98	145.74	111.168	205.839	77.2053
1330	ENSG00000084072	24.5331	1.23953	0.959532	1.29181	0.196424	0.999883	14.4936	7.39261	25.4907	37.9874	37.3014
1331	ENSG00000084073	110.267	0.30599	0.525602	0.582171	0.560452	0.999883	63.7716	122.506	115.416	133.398	116.242
1332	ENSG00000084090	112.769	0.06006	0.554282	0.108357	0.913713	0.999883	162.328	108.777	62.3106	126.33	104.097
1333	ENSG00000084092	21.549	0.0411894	1.35203	0.0304649	0.975696	0.999883	49.2781	0	14.8696	12.368	31.2291
1334	ENSG00000084093	188.375	0.181765	0.478568	0.379809	0.704087	0.999883	134.79	137.291	263.404	166.968	239.423
1335	ENSG00000084112	104.69	-0.360112	0.52219	-0.689619	0.490434	0.999883	107.252	93.9918	143.031	74.2079	104.965
1336	ENSG00000084207	1001.81	0.523353	0.327989	1.59564	0.110569	0.999883	676.849	820.58	1059.28	1152.87	1299.48
1337	ENSG00000084234	757.502	0.0614633	0.313772	0.195885	0.8447	0.999883	708.735	765.663	759.056	695.257	858.801
1338	ENSG00000084444	1.06171	-0.463593	4.35198	-0.106525	0.915166	0.999883	1.44936	0	2.12422	0	1.73495
1339	ENSG00000084463	152.895	0.760109	0.498089	1.52605	0.126997	0.999883	162.328	69.7018	127.453	185.52	219.471
1340	ENSG00000084623	259.854	0.395973	0.473454	0.83635	0.402958	0.999883	120.297	220.722	349.789	308.316	300.146
1341	ENSG00000084636	12.9226	1.34549	1.46078	0.921074	0.357012	0.999883	0	9.50479	14.1615	9.7177	31.2291
1342	ENSG00000084652	191.38	-0.196745	0.43197	-0.45546	0.648779	0.999883	239.144	202.769	163.565	149.299	202.122
1343	ENSG00000084676	26.1295	0.421241	1.01924	0.413289	0.679395	0.999883	4.34807	27.4583	36.8199	23.8525	38.1689
1344	ENSG00000084693	9.66583	0.185966	1.40688	0.132183	0.89484	0.999883	4.34807	7.39261	15.5776	10.6011	10.4097
1345	ENSG00000084710	5.61954	0.573758	2.09712	0.273593	0.784397	0.999883	1.44936	12.6731	0	5.30056	8.67475
1346	ENSG00000084731	27.28	-1.40293	1.4089	-0.995765	0.319364	0.999883	94.2081	0	14.8696	23.8525	3.4699
1347	ENSG00000084733	166.68	-0.542398	0.426219	-1.27258	0.203167	0.999883	195.663	178.479	197.553	128.98	132.724
1348	ENSG00000084754	358.427	-0.429562	0.371544	-1.15615	0.247618	0.999883	376.832	340.06	481.491	262.378	331.376
1349	ENSG00000084764	66.5841	-0.770205	0.735939	-1.04656	0.295302	0.999883	111.6	85.5431	42.4845	74.2079	19.0845
1350	ENSG00000084774	40.5705	0.0374174	0.903928	0.0413943	0.966982	0.999883	23.1897	49.6361	47.441	9.7177	72.8679
1351	ENSG00000085063	485.084	0.0981949	0.41182	0.238441	0.811539	0.999883	378.282	342.172	693.913	409.027	602.028
1352	ENSG00000085117	160.339	1.21491	0.549829	2.20962	0.0271316	0.999883	46.3794	154.189	113.292	305.666	182.17
1353	ENSG00000085185	36.334	-0.469276	0.873845	-0.537024	0.591251	0.999883	43.4807	62.3092	16.9938	42.4045	16.482
1354	ENSG00000085224	411.188	0.0974554	0.347061	0.280802	0.778862	0.999883	384.079	410.818	405.019	374.573	481.449
1355	ENSG00000085231	20.8416	0.465849	0.989987	0.470561	0.637954	0.999883	21.7403	10.5609	21.9503	28.2697	21.6869
1356	ENSG00000085274	8.99364	0.0760014	1.55571	0.0488532	0.961036	0.999883	20.291	4.22435	2.12422	6.18399	12.1447
1357	ENSG00000085276	31.6031	-0.193326	0.994115	-0.19447	0.845808	0.999883	37.6832	55.9726	6.37267	40.6377	17.3495
1358	ENSG00000085365	62.0158	0.362587	0.73583	0.492759	0.622183	0.999883	31.8858	100.328	34.6957	98.0604	45.1087
1359	ENSG00000085377	129.335	0.0372382	0.60671	0.0613772	0.951059	0.999883	142.037	196.432	46.0249	155.483	106.699
1360	ENSG00000085382	10.2573	-0.162274	1.70115	-0.0953909	0.924004	0.999883	4.34807	0	27.6149	13.2514	6.07233
1361	ENSG00000085415	8.33101	-0.830235	1.48506	-0.559059	0.576121	0.999883	8.69613	7.39261	14.1615	7.06742	4.33738
1362	ENSG00000085433	49.5719	0.153824	0.700966	0.219446	0.826303	0.999883	57.9742	54.9166	29.7391	62.7233	42.5063
1363	ENSG00000085449	13.7894	-0.706482	1.30938	-0.539556	0.589503	0.999883	17.3923	3.16826	28.323	6.18399	13.8796
1364	ENSG00000085491	49.2953	0.307307	0.809459	0.379645	0.704209	0.999883	15.9429	30.6265	87.8013	59.1896	52.916
1365	ENSG00000085511	67.2633	-0.32758	0.707323	-0.463126	0.643274	0.999883	114.499	25.3461	80.0125	60.0731	56.3859
1366	ENSG00000085563	7.78107	0.174175	1.77731	0.0979991	0.921933	0.999883	11.5948	0	10.6211	11.4846	5.20485
1367	ENSG00000085644	1.48177	1.82084	3.76291	0.483892	0.628462	0.999883	0	0	2.12422	4.41714	0.867475
1368	ENSG00000085662	158.442	0.502398	0.549267	0.91467	0.360365	0.999883	65.221	113.001	228	189.937	196.049
1369	ENSG00000085719	105.24	0.329344	0.512794	0.642255	0.520708	0.999883	105.803	70.7579	109.752	121.913	117.977
1370	ENSG00000085721	13.0286	0.957031	1.2528	0.763913	0.444919	0.999883	4.34807	16.8974	7.08075	21.2023	15.6146
1371	ENSG00000085733	106.715	0.493707	0.52756	0.935831	0.34936	0.999883	92.7588	71.814	110.46	98.0604	160.483
1372	ENSG00000085760	79.003	0.205812	0.556933	0.369546	0.711721	0.999883	86.9613	70.7579	65.851	78.625	92.8199
1373	ENSG00000085788	10.1983	0.551657	1.6311	0.338212	0.735204	0.999883	10.1455	0	15.5776	6.18399	19.0845
1374	ENSG00000085831	24.0809	0.0744917	1.10589	0.0673591	0.946296	0.999883	44.93	14.7852	11.3292	43.2879	6.07233
1375	ENSG00000085832	57.9593	0.565002	0.645264	0.875613	0.38124	0.999883	44.93	54.9166	46.0249	91.8764	52.0485
1376	ENSG00000085840	3.47951	-0.968968	2.81801	-0.343848	0.73096	0.999883	13.0442	0	0	0.883427	3.4699
1377	ENSG00000085871	8.4328	0.12094	2.05853	0.0587508	0.953151	0.999883	24.639	0	0	9.7177	7.80728
1378	ENSG00000085872	24.2909	-0.284076	0.93402	-0.304143	0.761019	0.999883	21.7403	39.0752	17.7019	23.8525	19.0845
1379	ENSG00000085978	9.42572	0.841956	1.75972	0.478459	0.632324	0.999883	13.0442	0	8.4969	23.8525	1.73495
1380	ENSG00000085982	73.7112	0.127259	0.573289	0.22198	0.824329	0.999883	82.6133	72.87	58.0621	81.2753	73.7354
1381	ENSG00000085998	25.4717	2.20027	0.919051	2.39407	0.0166625	0.999883	8.69613	12.6731	9.91305	36.2205	59.8558
1382	ENSG00000086015	286.553	-0.755029	0.514144	-1.46852	0.141964	0.999883	462.344	437.22	128.162	188.17	216.869
1383	ENSG00000086061	156.082	0.326367	0.487569	0.669376	0.503255	0.999883	207.258	98.2161	120.373	179.336	175.23
1384	ENSG00000086062	45.8506	0.934143	0.747744	1.24928	0.211562	0.999883	28.9871	19.0096	52.3975	74.2079	54.6509
1385	ENSG00000086065	33.181	-0.624741	0.801174	-0.779782	0.435519	0.999883	49.2781	36.9631	29.7391	26.5028	23.4218
1386	ENSG00000086102	82.4896	-0.532685	0.555828	-0.958363	0.33788	0.999883	88.4107	91.8796	101.963	52.1222	78.0728
1387	ENSG00000086189	4.8037	3.78268	2.31062	1.63708	0.101613	0.999883	0	0	2.12422	11.4846	10.4097
1388	ENSG00000086200	15.972	1.69703	1.19421	1.42105	0.155302	0.999883	4.34807	4.22435	16.2857	19.4354	35.5665
1389	ENSG00000086232	72.6513	0.0863525	0.574583	0.150287	0.880538	0.999883	65.221	84.487	63.0187	73.3245	77.2053
1390	ENSG00000086289	55.3935	-0.172249	0.681437	-0.252773	0.800444	0.999883	37.6832	82.3748	53.8137	40.6377	62.4582
1391	ENSG00000086475	14.852	1.06673	1.31444	0.811546	0.417052	0.999883	4.34807	13.7291	12.7453	3.53371	39.9039
1392	ENSG00000086504	48.2354	-0.874414	0.759697	-1.151	0.249731	0.999883	28.9871	65.4774	82.1367	21.2023	43.3738
1393	ENSG00000086506	1.68974	-4.12892	4.43714	-0.930536	0.352094	0.999883	0	8.4487	0	0	0
1394	ENSG00000086544	6.8838	2.63381	2.00982	1.31047	0.190037	0.999883	0	0	6.37267	15.9017	12.1447
1395	ENSG00000086589	103.774	-0.881667	0.613683	-1.43668	0.150808	0.999883	197.112	53.8605	130.286	78.625	58.9883
1396	ENSG00000086598	75.8713	0.323524	0.726808	0.44513	0.656226	0.999883	15.9429	98.2161	92.0497	76.8582	96.2898
1397	ENSG00000086619	25.5352	-0.316751	1.0866	-0.291507	0.770663	0.999883	18.8416	5.28044	58.7702	30.0365	14.7471
1398	ENSG00000086666	53.3732	-0.992367	0.763746	-1.29934	0.193826	0.999883	66.6704	51.7483	81.4286	12.368	54.6509
1399	ENSG00000086696	5.54363	-1.82381	2.16486	-0.842461	0.39953	0.999883	17.3923	5.28044	0.708075	0	4.33738
1400	ENSG00000086712	36.7487	-0.294623	0.858216	-0.343297	0.731375	0.999883	15.9429	71.814	31.1553	35.3371	29.4942
1401	ENSG00000086730	9.01666	2.47181	1.99583	1.23849	0.215536	0.999883	0	7.39261	2.12422	0	35.5665
1402	ENSG00000086758	657.101	-0.0240267	0.373327	-0.0643584	0.948685	0.999883	756.564	780.449	448.211	765.048	535.232
1403	ENSG00000086827	15.7893	-1.23122	1.16155	-1.05998	0.289154	0.999883	18.8416	28.5144	14.1615	4.41714	13.0121
1404	ENSG00000086848	8.93969	-0.0300844	1.57565	-0.0190933	0.984767	0.999883	8.69613	10.5609	7.78882	16.7851	0.867475
1405	ENSG00000086967	1.44936	-3.88495	4.44258	-0.874481	0.381856	0.999883	7.24678	0	0	0	0
1406	ENSG00000087008	11.6992	0.43791	1.30508	0.335543	0.737216	0.999883	7.24678	6.33653	16.9938	8.83427	19.0845
1407	ENSG00000087053	34.6207	-0.326504	0.813401	-0.401406	0.688121	0.999883	21.7403	46.4679	44.6087	23.8525	36.434
1408	ENSG00000087074	104.77	0.416461	0.516198	0.806785	0.41979	0.999883	105.803	102.44	69.3913	136.048	110.169
1409	ENSG00000087076	8.5669	0.165311	1.70868	0.096748	0.922927	0.999883	0	11.617	12.7453	14.1348	4.33738
1410	ENSG00000087077	56.2082	0.0396859	0.674948	0.0587984	0.953113	0.999883	47.8287	68.6457	50.2733	36.2205	78.0728
1411	ENSG00000087085	2.1561	-2.94166	3.7655	-0.781213	0.434677	0.999883	0	0	9.91305	0	0.867475
1412	ENSG00000087086	3258.86	0.045884	0.315575	0.145398	0.884396	0.999883	2605.94	3183.05	3861.84	2758.06	3885.42
1413	ENSG00000087087	382.702	-0.433392	0.351199	-1.23403	0.21719	0.999883	427.56	476.295	377.404	328.635	303.616
1414	ENSG00000087088	43.9118	0.113571	0.962273	0.118024	0.906049	0.999883	4.34807	34.8509	87.8013	33.5702	58.9883
1415	ENSG00000087095	79.3474	-0.902802	0.638388	-1.41419	0.157306	0.999883	108.702	137.291	46.7329	43.2879	60.7233
1416	ENSG00000087111	105.692	0.0943083	0.559488	0.168562	0.866141	0.999883	150.733	99.2722	59.4783	116.612	102.362
1417	ENSG00000087116	148.346	-0.305108	0.570815	-0.534513	0.592987	0.999883	271.029	141.516	70.0994	128.097	130.989
1418	ENSG00000087152	28.4854	-0.399303	0.887284	-0.450028	0.65269	0.999883	18.8416	33.7948	41.7764	16.7851	31.2291
1419	ENSG00000087157	25.5425	0.250187	1.10252	0.226924	0.820483	0.999883	17.3923	45.4118	8.4969	49.4719	6.9398
1420	ENSG00000087191	816.967	-0.144938	0.343347	-0.422132	0.672929	0.999883	972.518	838.534	737.814	942.617	593.353
1421	ENSG00000087206	33.4293	-1.16877	0.878805	-1.32996	0.183532	0.999883	26.0884	51.7483	50.9814	8.83427	29.4942
1422	ENSG00000087245	957.243	-0.6902	0.338399	-2.0396	0.04139	0.999883	1472.55	1026.52	888.634	728.827	669.691
1423	ENSG00000087253	12.5735	0.651126	1.27834	0.509355	0.610504	0.999883	10.1455	6.33653	14.1615	7.06742	25.1568
1424	ENSG00000087258	5.05905	-4.20847	2.43055	-1.73149	0.0833642	0.999883	15.9429	2.11218	6.37267	0	0.867475
1425	ENSG00000087263	222.286	0.675797	0.50716	1.33251	0.182692	0.999883	114.499	147.852	274.733	388.708	185.64
1426	ENSG00000087269	154.506	0.445709	0.440404	1.01205	0.311516	0.999883	128.993	154.189	121.789	178.452	189.11
1427	ENSG00000087274	286.329	0.0691474	0.414421	0.166853	0.867486	0.999883	359.44	275.639	208.174	349.837	238.556
1428	ENSG00000087299	17.5427	-2.17461	1.40608	-1.54657	0.121966	0.999883	11.5948	52.8044	12.0373	0	11.2772
1429	ENSG00000087301	2.77461	1.76175	2.70376	0.651592	0.514665	0.999883	2.89871	0	1.41615	0.883427	8.67475
1430	ENSG00000087302	49.658	-0.126164	0.683497	-0.184585	0.853554	0.999883	40.582	51.7483	61.6025	37.1039	57.2534
1431	ENSG00000087338	36.0442	0.119985	0.807735	0.148545	0.881913	0.999883	26.0884	24.29	53.8137	30.92	45.1087
1432	ENSG00000087365	1036.6	0.201057	0.333157	0.603491	0.546182	0.999883	969.619	1028.63	936.075	1402.88	845.788
1433	ENSG00000087448	93.7632	-0.282647	0.616296	-0.458622	0.646506	0.999883	43.4807	154.189	104.795	84.809	81.5427
1434	ENSG00000087460	157.855	0.719764	0.53216	1.35253	0.176205	0.999883	65.221	165.806	144.447	144.882	268.917
1435	ENSG00000087470	126.532	0.0322226	0.503971	0.0639373	0.94902	0.999883	88.4107	119.338	167.814	113.962	143.133
1436	ENSG00000087494	5.94247	0.547102	2.2203	0.24641	0.805365	0.999883	0	0	14.8696	5.30056	9.54223
1437	ENSG00000087502	24.8312	0.532856	0.964044	0.55273	0.580448	0.999883	23.1897	11.617	28.323	16.7851	44.2412
1438	ENSG00000087510	23.5528	-2.09607	1.04842	-1.99927	0.0455796	0.999883	39.1326	42.2435	20.5342	13.2514	2.60243
1439	ENSG00000087586	96.8277	0.194932	0.532642	0.365972	0.714386	0.999883	75.3665	107.721	91.3417	83.9256	125.784
1440	ENSG00000087842	11.56	0.940247	1.30799	0.718849	0.472234	0.999883	11.5948	3.16826	10.6211	17.6685	14.7471
1441	ENSG00000087884	44.298	-0.420392	0.756444	-0.555747	0.578384	0.999883	50.7274	71.814	25.4907	32.6868	40.7713
1442	ENSG00000087903	7.52603	-3.16564	2.12916	-1.4868	0.137066	0.999883	14.4936	0	20.5342	0	2.60243
1443	ENSG00000087995	30.2103	0.1887	0.862083	0.218888	0.826737	0.999883	18.8416	28.5144	38.236	22.0857	43.3738
1444	ENSG00000088002	3.76832	-5.26966	3.39839	-1.55064	0.120989	0.999883	18.8416	0	0	0	0
1445	ENSG00000088035	6.04263	-5.95228	2.40025	-2.47986	0.0131435	0.999883	21.7403	4.22435	4.24845	0	0
1446	ENSG00000088038	14.1951	1.32707	1.42287	0.932672	0.350989	0.999883	10.1455	0	16.2857	16.7851	27.7592
1447	ENSG00000088179	8.35988	0.0924106	1.71028	0.0540324	0.956909	0.999883	0	15.8413	8.4969	6.18399	11.2772
1448	ENSG00000088205	140.798	0.0085092	0.518036	0.0164259	0.986895	0.999883	105.803	100.328	214.547	124.563	158.748
1449	ENSG00000088247	613.782	0.452212	0.367247	1.23136	0.21819	0.999883	401.471	500.585	701.702	623.7	841.451
1450	ENSG00000088256	52.6724	0.0767962	0.726722	0.105675	0.91584	0.999883	60.8729	70.7579	23.3665	44.1714	64.1932
1451	ENSG00000088280	6.57203	-0.702818	1.91628	-0.366762	0.713796	0.999883	0	16.8974	6.37267	2.65028	6.9398
1452	ENSG00000088298	96.0106	-0.219262	0.608285	-0.360459	0.718504	0.999883	136.239	125.674	43.9006	89.2261	85.0126
1453	ENSG00000088305	6.85911	0.524299	1.72505	0.303933	0.761179	0.999883	10.1455	1.05609	6.37267	13.2514	3.4699
1454	ENSG00000088325	379.751	0.679104	0.361065	1.88083	0.0599945	0.999883	310.162	329.499	278.982	568.927	411.183
1455	ENSG00000088356	22.6647	-1.01857	1.08392	-0.939702	0.34737	0.999883	11.5948	60.197	13.4534	17.6685	10.4097
1456	ENSG00000088367	135.265	0.724697	0.523234	1.38504	0.166042	0.999883	60.8729	154.189	106.211	158.133	196.917
1457	ENSG00000088386	1.15948	-3.55772	4.45146	-0.799226	0.42416	0.999883	5.79742	0	0	0	0
1458	ENSG00000088387	8.25122	0.743553	1.70046	0.437267	0.661918	0.999883	0	13.7291	5.6646	9.7177	12.1447
1459	ENSG00000088448	23.3949	-0.970453	0.94509	-1.02684	0.304498	0.999883	24.639	22.1778	40.3603	16.7851	13.0121
1460	ENSG00000088451	2.27617	1.69994	3.19713	0.531707	0.594929	0.999883	1.44936	0	2.12422	0	7.80728
1461	ENSG00000088543	4.00816	-3.86185	2.54929	-1.51487	0.129804	0.999883	4.34807	10.5609	4.24845	0.883427	0
1462	ENSG00000088682	4.62199	1.91198	2.40144	0.796182	0.425926	0.999883	0	0	6.37267	14.1348	2.60243
1463	ENSG00000088756	7.54186	2.69701	1.80712	1.49244	0.135584	0.999883	0	6.33653	0.708075	16.7851	13.8796
1464	ENSG00000088808	1.96852	-0.321308	3.72415	-0.0862769	0.931246	0.999883	0	0	6.37267	0	3.4699
1465	ENSG00000088812	11.4226	1.63028	1.50357	1.08427	0.278244	0.999883	8.69613	0	9.91305	18.552	19.9519
1466	ENSG00000088826	34.6489	1.238	1.17916	1.0499	0.293763	0.999883	15.9429	0	50.9814	75.0913	31.2291
1467	ENSG00000088832	512.894	-0.293521	0.379819	-0.772791	0.439646	0.999883	414.516	494.249	751.268	509.738	394.701
1468	ENSG00000088833	70.0935	0.249203	0.706529	0.352715	0.724302	0.999883	86.9613	20.0657	88.5094	76.8582	78.0728
1469	ENSG00000088836	5.89675	1.69422	2.05299	0.825247	0.409231	0.999883	0	4.22435	4.95652	19.4354	0.867475
1470	ENSG00000088854	49.4293	-0.208433	0.900612	-0.231435	0.816977	0.999883	104.354	7.39261	45.3168	40.6377	49.4461
1471	ENSG00000088876	3.58891	1.97435	2.72067	0.725685	0.468032	0.999883	0	4.22435	0.708075	0	13.0121
1472	ENSG00000088888	385.812	0.819245	0.496925	1.64863	0.0992237	0.999883	140.587	218.61	525.392	530.056	514.413
1473	ENSG00000088899	7.14547	0.365292	1.78775	0.20433	0.838095	0.999883	0	8.4487	10.6211	9.7177	6.9398
1474	ENSG00000088930	708.698	-0.477143	0.350987	-1.35943	0.174011	0.999883	984.112	844.87	567.876	567.16	579.473
1475	ENSG00000088970	5.325	-0.454449	2.13135	-0.213222	0.831154	0.999883	10.1455	0	7.78882	0.883427	7.80728
1476	ENSG00000088986	236.339	0.779883	0.414599	1.88106	0.0599642	0.999883	165.227	149.964	235.081	282.697	348.725
1477	ENSG00000089006	135.569	-0.177524	0.477893	-0.371472	0.710286	0.999883	114.499	133.067	178.435	111.312	140.531
1478	ENSG00000089009	284.09	0.451697	0.473048	0.954864	0.339646	0.999883	175.372	178.479	388.025	251.777	426.798
1479	ENSG00000089022	31.9705	-0.638081	0.936588	-0.681282	0.495693	0.999883	23.1897	14.7852	73.6398	29.1531	19.0845
1480	ENSG00000089041	12.6235	1.16654	1.36941	0.851857	0.394293	0.999883	17.3923	1.05609	7.08075	15.9017	21.6869
1481	ENSG00000089048	244.351	-0.171949	0.417839	-0.411521	0.680691	0.999883	178.271	279.863	308.721	211.139	243.761
1482	ENSG00000089050	19.1391	0.31812	1.26416	0.251646	0.801315	0.999883	44.93	4.22435	3.54037	27.3862	15.6146
1483	ENSG00000089053	134.661	-0.27855	0.568319	-0.490129	0.624043	0.999883	69.5691	144.684	219.503	151.066	88.4825
1484	ENSG00000089057	22.3608	0.38149	1.11694	0.341551	0.732689	0.999883	2.89871	19.0096	37.528	17.6685	34.699
1485	ENSG00000089060	9.46946	-0.0939658	1.63441	-0.0574923	0.954153	0.999883	0	10.5609	18.4099	8.83427	9.54223
1486	ENSG00000089063	10.4454	2.00358	1.52096	1.31731	0.187735	0.999883	1.44936	1.05609	11.3292	12.368	26.0243
1487	ENSG00000089091	2.99248	2.23688	2.5491	0.877517	0.380206	0.999883	1.44936	0	2.12422	6.18399	5.20485
1488	ENSG00000089094	79.8053	-0.0756614	0.58682	-0.128935	0.897409	0.999883	110.151	58.0848	76.4721	90.993	63.3257
1489	ENSG00000089123	8.5364	5.14283	1.93422	2.65886	0.0078405	0.999883	0	0	1.41615	27.3862	13.8796
1490	ENSG00000089154	115.275	-0.140226	0.562662	-0.249219	0.803192	0.999883	71.0184	179.535	108.335	82.1587	135.326
1491	ENSG00000089157	440.992	0.212686	0.335224	0.634459	0.525782	0.999883	436.256	390.752	417.056	465.566	495.328
1492	ENSG00000089177	26.2848	-0.207747	1.02855	-0.201981	0.839931	0.999883	49.2781	11.617	22.6584	8.83427	39.0364
1493	ENSG00000089195	39.5364	-0.553688	0.840103	-0.659071	0.50985	0.999883	85.512	27.4583	23.3665	34.4537	26.8917
1494	ENSG00000089220	367.881	0.404265	0.436298	0.92658	0.354145	0.999883	218.853	343.228	414.224	286.23	576.871
1495	ENSG00000089225	8.71281	0.817405	1.44755	0.564683	0.57229	0.999883	5.79742	4.22435	9.91305	11.4846	12.1447
1496	ENSG00000089234	18.4573	0.116722	1.07788	0.108289	0.913767	0.999883	26.0884	8.4487	19.118	25.6194	13.0121
1497	ENSG00000089248	362.089	-0.10618	0.412899	-0.257157	0.797058	0.999883	492.781	389.696	236.497	389.591	301.881
1498	ENSG00000089280	845.945	-0.0543946	0.409391	-0.132867	0.894298	0.999883	1169.63	949.423	458.124	961.169	691.378
1499	ENSG00000089289	96.3106	-0.194567	0.654655	-0.297205	0.76631	0.999883	49.2781	88.7114	165.69	50.3554	127.519
1500	ENSG00000089327	114.355	-0.214585	0.488405	-0.439358	0.660402	0.999883	134.79	106.665	121.789	114.846	93.6873
1501	ENSG00000089335	8.88979	1.34011	1.66096	0.806831	0.419764	0.999883	5.79742	0	10.6211	15.0183	13.0121
1502	ENSG00000089351	79.9454	-0.300192	0.741831	-0.404664	0.685725	0.999883	143.486	84.487	31.8634	108.662	31.2291
1503	ENSG00000089486	102.557	-0.317301	0.632937	-0.501315	0.61615	0.999883	105.803	136.235	92.0497	143.999	34.699
1504	ENSG00000089597	110.223	0.418728	0.505688	0.828036	0.40765	0.999883	98.5562	108.777	84.2609	104.244	155.278
1505	ENSG00000089639	7.68252	-1.79812	2.06848	-0.869294	0.384686	0.999883	15.9429	0	16.2857	6.18399	0
1506	ENSG00000089682	48.3552	0.153517	0.731469	0.209875	0.833765	0.999883	23.1897	68.6457	46.7329	46.8216	56.3859
1507	ENSG00000089685	70.2541	1.13727	0.610575	1.86262	0.0625162	0.999883	55.0755	42.2435	45.3168	72.441	136.194
1508	ENSG00000089693	444.611	-0.720504	0.422188	-1.70659	0.0878975	0.999883	766.709	437.22	379.528	399.309	240.291
1509	ENSG00000089737	440.006	0.220385	0.428127	0.514766	0.606716	0.999883	289.871	299.929	647.18	440.83	522.22
1510	ENSG00000089775	6.32822	-0.803712	1.9561	-0.410876	0.681164	0.999883	14.4936	4.22435	4.24845	0	8.67475
1511	ENSG00000089818	15.9099	-0.105919	1.41331	-0.0749438	0.940259	0.999883	0	34.8509	14.1615	9.7177	20.8194
1512	ENSG00000089876	5.58272	2.84985	2.05295	1.38817	0.165086	0.999883	4.34807	0	0.708075	16.7851	6.07233
1513	ENSG00000089902	74.7859	0.113809	0.670911	0.169634	0.865298	0.999883	36.2339	52.8044	127.453	71.5576	85.8801
1514	ENSG00000089916	101.226	0.499995	0.534282	0.935825	0.349363	0.999883	57.9742	97.1601	104.795	135.164	111.037
1515	ENSG00000090006	6.14039	0.116757	2.26621	0.0515208	0.958911	0.999883	0	2.11218	15.5776	0	13.0121
1516	ENSG00000090013	74.2979	-0.0197779	0.625945	-0.0315968	0.974794	0.999883	39.1326	100.328	84.2609	64.4902	83.2776
1517	ENSG00000090020	33.8813	0.404337	0.80908	0.499748	0.617252	0.999883	27.5378	34.8509	27.6149	25.6194	53.7835
1518	ENSG00000090054	50.9417	0.0236673	0.688187	0.0343909	0.972565	0.999883	31.8858	62.3092	57.3541	44.1714	58.9883
1519	ENSG00000090060	269.635	-0.0528204	0.409181	-0.129088	0.897288	0.999883	336.25	284.088	201.093	298.598	228.146
1520	ENSG00000090061	16.8134	0.50815	1.079	0.470943	0.637681	0.999883	10.1455	13.7291	19.118	16.7851	24.2893
1521	ENSG00000090238	160.18	-0.939158	0.545859	-1.72051	0.0853389	0.999883	259.435	243.956	91.3417	128.097	78.0728
1522	ENSG00000090263	55.7341	0.312945	0.826441	0.378666	0.704936	0.999883	8.69613	80.2627	63.0187	50.3554	76.3378
1523	ENSG00000090266	135.195	-0.461155	0.474205	-0.97248	0.330812	0.999883	130.442	193.264	131.702	108.662	111.904
1524	ENSG00000090273	82.8641	0.248167	0.657689	0.377332	0.705927	0.999883	30.4365	71.814	128.162	96.2936	87.615
1525	ENSG00000090316	133.249	-0.579289	0.505601	-1.14574	0.251901	0.999883	120.297	220.722	119.665	94.5267	111.037
1526	ENSG00000090339	1.8104	2.2929	3.85475	0.594826	0.55196	0.999883	0	2.11218	0	0	6.9398
1527	ENSG00000090372	28.7153	0.678307	0.852343	0.795815	0.42614	0.999883	18.8416	24.29	26.1988	28.2697	45.9762
1528	ENSG00000090376	4.23503	0.30319	2.60131	0.116553	0.907214	0.999883	0	11.617	0	0.883427	8.67475
1529	ENSG00000090432	31.8097	-2.14671	1.03726	-2.0696	0.03849	0.999883	33.3352	47.5239	57.3541	0.883427	19.9519
1530	ENSG00000090447	8.73936	0.272087	1.60748	0.169263	0.86559	0.999883	17.3923	6.33653	0.708075	9.7177	9.54223
1531	ENSG00000090470	62.5379	0.352773	0.666825	0.529033	0.596782	0.999883	71.0184	28.5144	69.3913	83.0422	60.7233
1532	ENSG00000090487	32.0281	0.86906	0.854735	1.01676	0.309268	0.999883	14.4936	32.7387	24.7826	28.2697	59.8558
1533	ENSG00000090520	74.5726	-0.766445	0.595612	-1.28682	0.198157	0.999883	89.86	110.889	67.2671	41.5211	63.3257
1534	ENSG00000090530	17.9732	-1.2827	1.13334	-1.13179	0.257724	0.999883	42.0313	9.50479	19.118	7.06742	12.1447
1535	ENSG00000090554	1.65341	-0.565802	3.99679	-0.141564	0.887424	0.999883	0	0	5.6646	0	2.60243
1536	ENSG00000090565	74.0852	0.62443	0.664754	0.93934	0.347556	0.999883	23.1897	82.3748	76.4721	104.244	84.1451
1537	ENSG00000090581	16.2646	0.377814	1.1798	0.320235	0.74879	0.999883	26.0884	4.22435	13.4534	14.1348	23.4218
1538	ENSG00000090612	10.9523	1.77372	1.57579	1.12561	0.260332	0.999883	0	2.11218	14.1615	17.6685	20.8194
1539	ENSG00000090615	240.487	-0.234202	0.456637	-0.512884	0.608032	0.999883	181.169	277.751	308.013	145.765	289.737
1540	ENSG00000090621	431.378	0.775992	0.349483	2.2204	0.0263915	0.999883	284.074	377.023	345.541	527.406	622.847
1541	ENSG00000090686	292.116	-0.377299	0.390982	-0.965004	0.334543	0.999883	411.617	285.144	269.068	256.194	238.556
1542	ENSG00000090776	11.7397	0.265765	1.51026	0.175973	0.860315	0.999883	0	21.1218	11.3292	12.368	13.8796
1543	ENSG00000090857	224.569	1.0665	0.515313	2.06961	0.0384892	0.999883	68.1197	148.908	249.95	339.236	316.628
1544	ENSG00000090861	121.971	-0.339556	0.59686	-0.568903	0.569422	0.999883	75.3665	133.067	190.472	56.5393	154.411
1545	ENSG00000090863	310.939	0.286381	0.363126	0.788654	0.430314	0.999883	256.536	290.424	310.137	344.537	353.062
1546	ENSG00000090889	75.21	0.971195	0.661757	1.4676	0.142213	0.999883	52.1768	23.2339	87.0932	104.244	109.302
1547	ENSG00000090905	437.979	-0.215527	0.386253	-0.557994	0.576849	0.999883	527.565	542.829	321.466	333.935	464.099
1548	ENSG00000090924	28.9635	0.374166	1.00643	0.371777	0.710059	0.999883	5.79742	21.1218	50.2733	45.9382	21.6869
1549	ENSG00000090971	26.369	0.11221	0.885875	0.126666	0.899205	0.999883	24.639	22.1778	29.7391	35.3371	19.9519
1550	ENSG00000090975	11.0267	3.49685	1.54538	2.26278	0.0236495	0.999883	0	1.05609	4.95652	30.0365	19.0845
1551	ENSG00000090989	44.6953	0.299941	0.720784	0.416132	0.677313	0.999883	52.1768	25.3461	45.3168	48.5885	52.0485
1552	ENSG00000091009	35.0571	-0.655589	0.879944	-0.745035	0.45625	0.999883	21.7403	55.9726	45.3168	11.4846	40.7713
1553	ENSG00000091039	240.655	-0.323414	0.392219	-0.824574	0.409613	0.999883	224.65	266.134	293.851	220.857	197.784
1554	ENSG00000091073	7.09183	-0.513265	1.85715	-0.276372	0.782262	0.999883	0	6.33653	17.7019	7.95084	3.4699
1555	ENSG00000091127	17.4851	0.642146	1.06441	0.603289	0.546316	0.999883	15.9429	8.4487	18.4099	21.2023	23.4218
1556	ENSG00000091129	2.01316	0.179439	3.34698	0.0536123	0.957244	0.999883	0	0	5.6646	3.53371	0.867475
1557	ENSG00000091136	273.23	0.0575607	0.448605	0.128311	0.897903	0.999883	230.448	247.124	328.547	172.268	387.761
1558	ENSG00000091140	41.8728	0.0720431	0.76236	0.0945001	0.924712	0.999883	46.3794	48.58	28.323	59.1896	26.8917
1559	ENSG00000091157	32.1903	-0.391034	0.874685	-0.447057	0.654834	0.999883	18.8416	62.3092	25.4907	29.1531	25.1568
1560	ENSG00000091164	225.18	-0.556467	0.492662	-1.12951	0.258682	0.999883	426.111	183.759	165.69	185.52	164.82
[truncated: 61,143 more rows]

## Sheet: EtOH 0.25%_12h
	gene	baseMean	log2FoldChange	lfcSE	stat	pvalue	padj	aK32	aK33	aK43	zK7	zK8
[truncated: 62,703 more rows]

[truncated: 1 more sheets: EtOH 0.75%_12h]
