# Supplementary material for: Cannabidiol (CBD) modulates the transcriptional profile of ethanol-exposed human dermal fibroblast cells
Source: J Appl Genet. 2024 Oct 28;65(4):773–96. doi: 10.1007/s13353-024-00915-7 (PMC11561130; doi:10.1007/s13353-024-00915-7)
Supplement: Supplementary file 7 — Supplementary file7 (XLSX 12 KB) [file 13353_2024_915_MOESM7_ESM.xlsx]

## Sheet: venn_result24246
Groups	total	Gene_ID	Gene_name
EtOH 0.25_6h EtOH 0.75_6h	6	ENSG00000105258	POLR2I
		ENSG00000108518	PFN1
		ENSG00000159403	C1R
		ENSG00000264229	RNU4ATAC
		ENSG00000111678	C12orf57
		ENSG00000239809	0
EtOH 0.25_12h EtOH 0.75_12h	4	ENSG00000182985	CADM1
		ENSG00000243304	0
		ENSG00000213862	RPL7AP62
		ENSG00000231434	HSP90AA3P
EtOH 0.25_6h	23	ENSG00000131016	AKAP12
		ENSG00000130816	DNMT1
		ENSG00000115461	IGFBP5
		ENSG00000249992	TMEM158
		ENSG00000164292	RHOBTB3
		ENSG00000172403	SYNPO2
		ENSG00000213626	LBH
		ENSG00000167526	RPL13
		ENSG00000115053	NCL
		ENSG00000166598	HSP90B1
		ENSG00000090621	PABPC4
		ENSG00000164283	ESM1
		ENSG00000167670	CHAF1A
		ENSG00000156976	EIF4A2
		ENSG00000127241	MASP1
		ENSG00000277791	PSMB3
		ENSG00000104611	SH2D4A
		ENSG00000067167	TRAM1
		ENSG00000163565	IFI16
		ENSG00000102317	RBM3
		ENSG00000138829	FBN2
		ENSG00000109861	CTSC
		ENSG00000104738	MCM4
EtOH 0.75_6h	5	ENSG00000230074	0
		ENSG00000147274	RBMX
		ENSG00000117410	ATP6V0B
		ENSG00000101940	WDR13
		ENSG00000177600	RPLP2
EtOH 0.25_12h	29	ENSG00000144810	COL8A1
		ENSG00000213130	EEF1DP5
		ENSG00000196923	PDLIM7
		ENSG00000240950	0
		ENSG00000198868	MTND4LP30
		ENSG00000124766	SOX4
		ENSG00000244053	RPL13AP2
		ENSG00000259160	0
		ENSG00000104687	GSR
		ENSG00000187957	DNER
		ENSG00000171159	BBLN
		ENSG00000078401	EDN1
		ENSG00000253558	0
		ENSG00000179222	MAGED1
		ENSG00000219149	PPIAP87
		ENSG00000104973	MED25
		ENSG00000171345	KRT19
		ENSG00000233839	0
		ENSG00000231369	0
		ENSG00000289268	0
		ENSG00000270992	0
		ENSG00000108821	COL1A1
		ENSG00000171992	SYNPO
		ENSG00000188375	H3-5
		ENSG00000170801	HTRA3
		ENSG00000170469	SPATA24
		ENSG00000163064	EN1
		ENSG00000197061	H4C3
		ENSG00000214612	RPS19P1
EtOH 0.75_12h	10	ENSG00000227437	RPS8P4
		ENSG00000227081	0
		ENSG00000259020	0
		ENSG00000149294	NCAM1
		ENSG00000273870	0
		ENSG00000206228	HNRNPA1P4
		ENSG00000241352	0
		ENSG00000100150	DEPDC5
		ENSG00000268623	0
		ENSG00000104808	DHDH
