# Supplementary material for: Cannabidiol (CBD) modulates the transcriptional profile of ethanol-exposed human dermal fibroblast cells
Source: J Appl Genet. 2024 Oct 28;65(4):773–96. doi: 10.1007/s13353-024-00915-7 (PMC11561130; doi:10.1007/s13353-024-00915-7)
Supplement: Supplementary file 8 — Supplementary file8 (XLSX 319 KB) [file 13353_2024_915_MOESM8_ESM.xlsx]

## Sheet: Genes annotation
userId	geneSymbol	geneName	entrezgene	gLink
ENSG00000105258	POLR2I	RNA polymerase II subunit I	5438	https://www.ncbi.nlm.nih.gov/gene/?term=5438
ENSG00000108518	PFN1	profilin 1	5216	https://www.ncbi.nlm.nih.gov/gene/?term=5216
ENSG00000159403	C1R	complement C1r	715	https://www.ncbi.nlm.nih.gov/gene/?term=715
ENSG00000264229	RNU4ATAC	RNA, U4atac small nuclear (U12-dependent splicing)	100151683	https://www.ncbi.nlm.nih.gov/gene/?term=100151683
ENSG00000111678	C12orf57	chromosome 12 open reading frame 57	113246	https://www.ncbi.nlm.nih.gov/gene/?term=113246
ENSG00000182985	CADM1	cell adhesion molecule 1	23705	https://www.ncbi.nlm.nih.gov/gene/?term=23705
ENSG00000131016	AKAP12	A-kinase anchoring protein 12	9590	https://www.ncbi.nlm.nih.gov/gene/?term=9590
ENSG00000130816	DNMT1	DNA methyltransferase 1	1786	https://www.ncbi.nlm.nih.gov/gene/?term=1786
ENSG00000115461	IGFBP5	insulin like growth factor binding protein 5	3488	https://www.ncbi.nlm.nih.gov/gene/?term=3488
ENSG00000249992	TMEM158	transmembrane protein 158 (gene/pseudogene)	25907	https://www.ncbi.nlm.nih.gov/gene/?term=25907
ENSG00000164292	RHOBTB3	Rho related BTB domain containing 3	22836	https://www.ncbi.nlm.nih.gov/gene/?term=22836
ENSG00000172403	SYNPO2	synaptopodin 2	171024	https://www.ncbi.nlm.nih.gov/gene/?term=171024
ENSG00000213626	LBH	limb bud and heart development	81606	https://www.ncbi.nlm.nih.gov/gene/?term=81606
ENSG00000167526	RPL13	ribosomal protein L13	6137	https://www.ncbi.nlm.nih.gov/gene/?term=6137
ENSG00000115053	NCL	nucleolin	4691	https://www.ncbi.nlm.nih.gov/gene/?term=4691
ENSG00000166598	HSP90B1	heat shock protein 90 beta family member 1	7184	https://www.ncbi.nlm.nih.gov/gene/?term=7184
ENSG00000090621	PABPC4	poly(A) binding protein cytoplasmic 4	8761	https://www.ncbi.nlm.nih.gov/gene/?term=8761
ENSG00000164283	ESM1	endothelial cell specific molecule 1	11082	https://www.ncbi.nlm.nih.gov/gene/?term=11082
ENSG00000167670	CHAF1A	chromatin assembly factor 1 subunit A	10036	https://www.ncbi.nlm.nih.gov/gene/?term=10036
ENSG00000156976	EIF4A2	eukaryotic translation initiation factor 4A2	1974	https://www.ncbi.nlm.nih.gov/gene/?term=1974
ENSG00000127241	MASP1	mannan binding lectin serine peptidase 1	5648	https://www.ncbi.nlm.nih.gov/gene/?term=5648
ENSG00000277791	PSMB3	proteasome subunit beta 3	5691	https://www.ncbi.nlm.nih.gov/gene/?term=5691
ENSG00000104611	SH2D4A	SH2 domain containing 4A	63898	https://www.ncbi.nlm.nih.gov/gene/?term=63898
ENSG00000067167	TRAM1	translocation associated membrane protein 1	23471	https://www.ncbi.nlm.nih.gov/gene/?term=23471
ENSG00000163565	IFI16	interferon gamma inducible protein 16	3428	https://www.ncbi.nlm.nih.gov/gene/?term=3428
ENSG00000102317	RBM3	RNA binding motif protein 3	5935	https://www.ncbi.nlm.nih.gov/gene/?term=5935
ENSG00000138829	FBN2	fibrillin 2	2201	https://www.ncbi.nlm.nih.gov/gene/?term=2201
ENSG00000109861	CTSC	cathepsin C	1075	https://www.ncbi.nlm.nih.gov/gene/?term=1075
ENSG00000104738	MCM4	minichromosome maintenance complex component 4	4173	https://www.ncbi.nlm.nih.gov/gene/?term=4173
ENSG00000147274	RBMX	RNA binding motif protein X-linked	27316	https://www.ncbi.nlm.nih.gov/gene/?term=27316
ENSG00000117410	ATP6V0B	ATPase H+ transporting V0 subunit b	533	https://www.ncbi.nlm.nih.gov/gene/?term=533
ENSG00000101940	WDR13	WD repeat domain 13	64743	https://www.ncbi.nlm.nih.gov/gene/?term=64743
ENSG00000177600	RPLP2	ribosomal protein lateral stalk subunit P2	6181	https://www.ncbi.nlm.nih.gov/gene/?term=6181
ENSG00000144810	COL8A1	collagen type VIII alpha 1 chain	1295	https://www.ncbi.nlm.nih.gov/gene/?term=1295
ENSG00000196923	PDLIM7	PDZ and LIM domain 7	9260	https://www.ncbi.nlm.nih.gov/gene/?term=9260
ENSG00000124766	SOX4	SRY-box 4	6659	https://www.ncbi.nlm.nih.gov/gene/?term=6659
ENSG00000104687	GSR	glutathione-disulfide reductase	2936	https://www.ncbi.nlm.nih.gov/gene/?term=2936
ENSG00000187957	DNER	delta/notch like EGF repeat containing	92737	https://www.ncbi.nlm.nih.gov/gene/?term=92737
ENSG00000171159	C9orf16	chromosome 9 open reading frame 16	79095	https://www.ncbi.nlm.nih.gov/gene/?term=79095
ENSG00000078401	EDN1	endothelin 1	1906	https://www.ncbi.nlm.nih.gov/gene/?term=1906
ENSG00000179222	MAGED1	MAGE family member D1	9500	https://www.ncbi.nlm.nih.gov/gene/?term=9500
ENSG00000104973	MED25	mediator complex subunit 25	81857	https://www.ncbi.nlm.nih.gov/gene/?term=81857
ENSG00000171345	KRT19	keratin 19	3880	https://www.ncbi.nlm.nih.gov/gene/?term=3880
ENSG00000108821	COL1A1	collagen type I alpha 1 chain	1277	https://www.ncbi.nlm.nih.gov/gene/?term=1277
ENSG00000171992	SYNPO	synaptopodin	11346	https://www.ncbi.nlm.nih.gov/gene/?term=11346
ENSG00000188375	H3F3C	H3 histone family member 3C	440093	https://www.ncbi.nlm.nih.gov/gene/?term=440093
ENSG00000170801	HTRA3	HtrA serine peptidase 3	94031	https://www.ncbi.nlm.nih.gov/gene/?term=94031
ENSG00000170469	SPATA24	spermatogenesis associated 24	202051	https://www.ncbi.nlm.nih.gov/gene/?term=202051
ENSG00000163064	EN1	engrailed homeobox 1	2019	https://www.ncbi.nlm.nih.gov/gene/?term=2019
ENSG00000197061	HIST1H4C	histone cluster 1 H4 family member c	8364	https://www.ncbi.nlm.nih.gov/gene/?term=8364
ENSG00000149294	NCAM1	neural cell adhesion molecule 1	4684	https://www.ncbi.nlm.nih.gov/gene/?term=4684
ENSG00000100150	DEPDC5	DEP domain containing 5	9681	https://www.ncbi.nlm.nih.gov/gene/?term=9681
ENSG00000104808	DHDH	dihydrodiol dehydrogenase	27294	https://www.ncbi.nlm.nih.gov/gene/?term=27294

## Sheet: BP
geneSet	description	link	size	overlap	expect	enrichmentRatio	pValue	FDR	overlapId	userId
GO:0006518	peptide metabolic process	http://amigo.geneontology.org/amigo/term/GO:0006518	780	10	2.29329	4.36054	7.43023e-05	0.357201	1974;2936;3488;4691;5935;6137;6181;6659;8761;171024	ENSG00000115461;ENSG00000172403;ENSG00000167526;ENSG00000115053;ENSG00000090621;ENSG00000156976;ENSG00000102317;ENSG00000177600;ENSG00000124766;ENSG00000104687
GO:1904707	positive regulation of vascular smooth muscle cell proliferation	http://amigo.geneontology.org/amigo/term/GO:1904707	32	3	0.0940838	31.8865	0.000111566	0.357201	1786;1906;3488	ENSG00000130816;ENSG00000115461;ENSG00000078401
GO:0034392	negative regulation of smooth muscle cell apoptotic process	http://amigo.geneontology.org/amigo/term/GO:0034392	7	2	0.0205808	97.1778	0.000176171	0.357201	1786;1906	ENSG00000130816;ENSG00000078401
GO:0001649	osteoblast differentiation	http://amigo.geneontology.org/amigo/term/GO:0001649	203	5	0.596844	8.3774	0.000314898	0.357201	1277;2201;3488;9260;27316	ENSG00000115461;ENSG00000138829;ENSG00000147274;ENSG00000196923;ENSG00000108821
GO:0010629	negative regulation of gene expression	http://amigo.geneontology.org/amigo/term/GO:0010629	1734	14	5.09816	2.74609	0.000333154	0.357201	1786;1906;2019;3428;3488;4691;5438;5935;6137;6181;8761;9500;27316;81857	ENSG00000105258;ENSG00000130816;ENSG00000115461;ENSG00000167526;ENSG00000115053;ENSG00000090621;ENSG00000163565;ENSG00000102317;ENSG00000147274;ENSG00000177600;ENSG00000078401;ENSG00000179222;ENSG00000104973;ENSG00000163064
GO:0060346	bone trabecula formation	http://amigo.geneontology.org/amigo/term/GO:0060346	10	2	0.0294012	68.0245	0.000375386	0.357201	1277;2201	ENSG00000138829;ENSG00000108821
GO:0006412	translation	http://amigo.geneontology.org/amigo/term/GO:0006412	613	8	1.80229	4.43879	0.000380512	0.357201	1974;3488;4691;5935;6137;6181;6659;8761	ENSG00000115461;ENSG00000167526;ENSG00000115053;ENSG00000090621;ENSG00000156976;ENSG00000102317;ENSG00000177600;ENSG00000124766
GO:1904705	regulation of vascular smooth muscle cell proliferation	http://amigo.geneontology.org/amigo/term/GO:1904705	49	3	0.144066	20.8238	0.000400113	0.357201	1786;1906;3488	ENSG00000130816;ENSG00000115461;ENSG00000078401
GO:1990874	vascular smooth muscle cell proliferation	http://amigo.geneontology.org/amigo/term/GO:1990874	49	3	0.144066	20.8238	0.000400113	0.357201	1786;1906;3488	ENSG00000130816;ENSG00000115461;ENSG00000078401
GO:0030036	actin cytoskeleton organization	http://amigo.geneontology.org/amigo/term/GO:0030036	626	8	1.84051	4.34661	0.000437683	0.357201	1906;3880;5216;7184;9260;11346;22836;171024	ENSG00000108518;ENSG00000164292;ENSG00000172403;ENSG00000166598;ENSG00000196923;ENSG00000078401;ENSG00000171345;ENSG00000171992
GO:0043043	peptide biosynthetic process	http://amigo.geneontology.org/amigo/term/GO:0043043	636	8	1.86991	4.27827	0.00048628	0.357201	1974;3488;4691;5935;6137;6181;6659;8761	ENSG00000115461;ENSG00000167526;ENSG00000115053;ENSG00000090621;ENSG00000156976;ENSG00000102317;ENSG00000177600;ENSG00000124766
GO:0097435	supramolecular fiber organization	http://amigo.geneontology.org/amigo/term/GO:0097435	640	8	1.88168	4.25153	0.000506911	0.357201	1277;1906;3880;5216;7184;11346;22836;171024	ENSG00000108518;ENSG00000164292;ENSG00000172403;ENSG00000166598;ENSG00000078401;ENSG00000171345;ENSG00000108821;ENSG00000171992
GO:0010608	posttranscriptional regulation of gene expression	http://amigo.geneontology.org/amigo/term/GO:0010608	486	7	1.4289	4.89888	0.000510792	0.357201	1974;3488;4691;5438;5935;6659;8761	ENSG00000105258;ENSG00000115461;ENSG00000115053;ENSG00000090621;ENSG00000156976;ENSG00000102317;ENSG00000124766
GO:0061430	bone trabecula morphogenesis	http://amigo.geneontology.org/amigo/term/GO:0061430	13	2	0.0382215	52.3265	0.000647013	0.420142	1277;2201	ENSG00000138829;ENSG00000108821
GO:0043603	cellular amide metabolic process	http://amigo.geneontology.org/amigo/term/GO:0043603	1033	10	3.03714	3.29257	0.000717627	0.43493	1974;2936;3488;4691;5935;6137;6181;6659;8761;171024	ENSG00000115461;ENSG00000172403;ENSG00000167526;ENSG00000115053;ENSG00000090621;ENSG00000156976;ENSG00000102317;ENSG00000177600;ENSG00000124766;ENSG00000104687
GO:0032233	positive regulation of actin filament bundle assembly	http://amigo.geneontology.org/amigo/term/GO:0032233	62	3	0.182287	16.4575	0.000799605	0.454326	5216;11346;171024	ENSG00000108518;ENSG00000172403;ENSG00000171992
GO:0051017	actin filament bundle assembly	http://amigo.geneontology.org/amigo/term/GO:0051017	148	4	0.435137	9.1925	0.000927605	0.49605	5216;7184;11346;171024	ENSG00000108518;ENSG00000172403;ENSG00000166598;ENSG00000171992
GO:0061572	actin filament bundle organization	http://amigo.geneontology.org/amigo/term/GO:0061572	151	4	0.443958	9.00987	0.000999493	0.500524	5216;7184;11346;171024	ENSG00000108518;ENSG00000172403;ENSG00000166598;ENSG00000171992
GO:0030029	actin filament-based process	http://amigo.geneontology.org/amigo/term/GO:0030029	715	8	2.10218	3.80557	0.00104608	0.500524	1906;3880;5216;7184;9260;11346;22836;171024	ENSG00000108518;ENSG00000164292;ENSG00000172403;ENSG00000166598;ENSG00000196923;ENSG00000078401;ENSG00000171345;ENSG00000171992
GO:0099010	modification of postsynaptic structure	http://amigo.geneontology.org/amigo/term/GO:0099010	17	2	0.049982	40.0144	0.00111968	0.508952	5216;11346	ENSG00000108518;ENSG00000171992

## Sheet: Panther
geneSet	description	link	size	overlap	expect	enrichmentRatio	pValue	FDR	overlapId	userId
P00017	DNA replication	http://www.pantherdb.org/pathway/pathwayDiagram.jsp?catAccession=P00017	19	1	0.0586937	17.0376	0.0573118	1	440093	ENSG00000188375
P00034	Integrin signalling pathway	http://www.pantherdb.org/pathway/pathwayDiagram.jsp?catAccession=P00034	166	2	0.512798	3.90017	0.0877694	1	1277;1295	ENSG00000144810;ENSG00000108821
P00016	Cytoskeletal regulation by Rho GTPase	http://www.pantherdb.org/pathway/pathwayDiagram.jsp?catAccession=P00016	71	1	0.219329	4.55936	0.199996	1	5216	ENSG00000108518
P00019	Endothelin signaling pathway	http://www.pantherdb.org/pathway/pathwayDiagram.jsp?catAccession=P00019	77	1	0.237864	4.20408	0.2152	1	1906	ENSG00000078401
P00057	Wnt signaling pathway	http://www.pantherdb.org/pathway/pathwayDiagram.jsp?catAccession=P00057	294	2	0.908208	2.20214	0.227315	1	1906;2019	ENSG00000078401;ENSG00000163064
P00049	Parkinson disease	http://www.pantherdb.org/pathway/pathwayDiagram.jsp?catAccession=P00049	89	1	0.274934	3.63724	0.244865	1	5691	ENSG00000277791

## Sheet: GeneMANIA
Function	FDR	Genes in network	Genes in genome
DNA replication-dependent nucleosome organization	0.108612	3	10
regulation of mRNA splicing, via spliceosome	0.182329	5	89
positive regulation of RNA splicing	0.241068	3	18
regulation of RNA splicing	0.354028	5	118
regulation of mRNA processing	0.393405	5	129
regulation of smooth muscle cell proliferation	0.393405	4	72
positive regulation of mRNA processing	0.393405	3	27
smooth muscle cell proliferation	0.469465	4	78
vascular associated smooth muscle cell proliferation	0.554782	3	35
regulation of vascular associated smooth muscle cell proliferation	0.554782	3	35
