# Supplementary material for: Cannabidiol (CBD) modulates the transcriptional profile of ethanol-exposed human dermal fibroblast cells
Source: J Appl Genet. 2024 Oct 28;65(4):773–96. doi: 10.1007/s13353-024-00915-7 (PMC11561130; doi:10.1007/s13353-024-00915-7)
Supplement: Supplementary file 11 — Supplementary file11 (XLSX 23322 KB) [file 13353_2024_915_MOESM11_ESM.xlsx]

## Sheet: ET025 vs ET025CBD075_6h
	gene		baseMean	log2FoldChange	lfcSE	stat	pvalue	padj	K20	K21	K37	K38	K39
1	ENSG00000120802	TMPO	181.253	-2.16021	0.386039	-5.59584	2.19559e-08	6.88537e-05	339.583	338.397	89.6552	71.6355	66.994
2	ENSG00000104687	GSR	294.137	-1.96166	0.365422	-5.3682	7.95245e-08	0.000124694	441.654	619.45	171.4	114.617	123.567
3	ENSG00000110651	CD81	957.675	1.48085	0.281391	5.26261	1.42028e-07	0.000148466	493.671	429.721	1212.98	1443.13	1208.87
4	ENSG00000176014	TUBB6	643.638	1.55231	0.307204	5.05303	4.34857e-07	0.000340928	258.122	337.689	812.171	797.108	1013.1
5	ENSG00000128272	ATF4	327.348	1.64467	0.330251	4.98007	6.3561e-07	0.000398655	159.977	128.138	440.365	436.325	471.935
6	ENSG00000166598	HSP90B1	2474.96	-1.31827	0.268345	-4.9126	8.9877e-07	0.000469757	4134.86	3593.52	1417.34	1441.83	1787.25
7	ENSG00000163191	S100A11	1018.5	1.47452	0.309098	4.77039	1.83873e-06	0.000823752	428.895	556.443	1186.61	1194.36	1726.21
8	ENSG00000120913	PDLIM2	128.78	2.14406	0.466906	4.59206	4.38901e-06	0.00172049	31.4065	52.3878	185.903	230.536	143.665
9	ENSG00000239809	0	193.142	2.27847	0.50112	4.54676	5.44774e-06	0.00189823	76.5533	40.3527	363.895	351.665	133.244
10	ENSG00000214160	ALG3	144.09	-1.95225	0.444929	-4.38778	1.14516e-05	0.00359122	196.291	323.53	64.6045	53.401	82.6259
11	ENSG00000113141	IK	401.317	-1.38292	0.320927	-4.30914	1.6389e-05	0.0044434	710.572	564.231	225.457	233.141	273.187
12	ENSG00000159403	C1R	278.662	-2.17682	0.50612	-4.301	1.70028e-05	0.0044434	501.522	546.532	36.9169	118.524	189.816
13	ENSG00000102317	RBM3	569.369	-1.48838	0.356006	-4.18078	2.9051e-05	0.0063885	664.444	1191.47	266.329	315.196	409.408
14	ENSG00000215030	RPL13P12	305.662	-1.57078	0.376751	-4.16927	3.05572e-05	0.0063885	601.631	415.563	134.483	151.086	225.546
15	ENSG00000224074	LINC00691	80.7214	2.6954	0.642953	4.19222	2.76234e-05	0.0063885	20.6105	16.9906	184.584	136.759	44.6627
16	ENSG00000127241	MASP1	317.394	-1.39825	0.336844	-4.15103	3.30985e-05	0.00648731	485.819	525.294	164.807	227.931	183.117
17	ENSG00000128595	CALU	2538.73	-1.06551	0.258775	-4.11752	3.82977e-05	0.00706481	3371.29	4022.53	1844.52	1712.74	1742.59
18	ENSG00000169871	TRIM56	156.276	-1.62345	0.40062	-4.05234	5.0708e-05	0.00883446	272.844	253.444	75.1522	79.4503	100.491
19	ENSG00000198113	TOR4A	160.344	1.59181	0.396007	4.01964	5.82867e-05	0.00962037	79.4977	65.8387	222.82	231.839	201.726
20	ENSG00000088888	MAVS	236.387	-1.58947	0.399546	-3.97819	6.94417e-05	0.0098986	298.362	491.312	108.114	115.919	168.229
21	ENSG00000115053	NCL	3429.14	-1.25224	0.31419	-3.98562	6.73035e-05	0.0098986	5099.63	5423.55	1822.11	1717.95	3082.47
22	ENSG00000130816	DNMT1	310.773	-1.55314	0.38993	-3.98312	6.80177e-05	0.0098986	538.818	491.312	116.024	157.598	250.111
23	ENSG00000105258	POLR2I	398.741	1.54031	0.390375	3.94572	7.95609e-05	0.00998012	226.716	145.128	648.682	638.207	334.97
24	ENSG00000115414	FN1	5716.37	-1.03788	0.262882	-3.94809	7.87788e-05	0.00998012	9406.24	7110.58	3988.34	3803.19	4273.47
25	ENSG00000167526	RPL13	527.123	-1.29446	0.327144	-3.95686	7.59419e-05	0.00998012	687.017	949.352	276.876	320.406	401.964
26	ENSG00000163565	IFI16	278.523	-1.32592	0.340174	-3.89778	9.70784e-05	0.0117092	441.654	430.429	159.534	161.506	199.493
27	ENSG00000085662	AKR1B1	132.687	-1.6938	0.438397	-3.86364	0.000111712	0.0128165	188.439	265.479	60.6491	62.5183	86.3478
28	ENSG00000106080	FKBP14	174.72	-1.50272	0.389532	-3.85775	0.000114433	0.0128165	281.677	288.841	119.98	98.9872	84.1147
29	ENSG00000116649	SRM	358.786	1.32845	0.346196	3.83727	0.000124408	0.0132419	230.641	146.544	472.008	425.906	518.831
30	ENSG00000198034	RPS4X	1350.43	1.15458	0.301234	3.83283	0.000126677	0.0132419	777.311	779.445	1372.52	1604.64	2218.25
31	ENSG00000115461	IGFBP5	191.627	-1.42891	0.375714	-3.80319	0.000142845	0.0140338	328.787	286.009	125.254	119.827	98.2578
32	ENSG00000177352	CCDC71	150.998	2.00407	0.527031	3.80257	0.000143202	0.0140338	77.5348	30.4415	279.513	251.376	116.123
33	ENSG00000092201	SUPT16H	721.996	-1.06211	0.280819	-3.78217	0.000155469	0.0147743	1005.01	1095.9	506.288	483.214	519.576
34	ENSG00000115649	CNPPD1	172.612	1.98153	0.529634	3.74133	0.000183049	0.0168836	59.8686	64.4228	236.004	403.764	99.0022
35	ENSG00000159335	PTMS	1460.95	-1.10255	0.29565	-3.72924	0.000192055	0.0172082	2361.38	1938.35	930.832	1246.46	827.748
36	ENSG00000116688	MFN2	106.09	-1.90328	0.515781	-3.69008	0.00022418	0.0195285	182.55	197.516	32.9615	37.7715	79.6484
37	ENSG00000156467	UQCRB	454.084	-1.16121	0.317583	-3.6564	0.000255782	0.0216792	642.852	717.146	271.603	274.82	364.001
38	ENSG00000228462	RPS19P7	150.07	1.6769	0.461244	3.6356	0.000277337	0.0223008	58.8872	70.0864	221.501	274.82	125.055
39	ENSG00000264229	RNU4ATAC	1493.75	-1.15877	0.318475	-3.63849	0.000274238	0.0223008	2046.33	2419.04	1241.99	1081.04	680.361
40	ENSG00000228253	MT-ATP8	4814.2	1.55364	0.431459	3.60091	0.000317111	0.0248615	2558.65	1897.29	3988.34	3679.46	11947.3
41	ENSG00000090621	PABPC4	475.023	-1.2656	0.354056	-3.57458	0.00035079	0.0266424	750.811	713.607	278.195	214.907	417.596
42	ENSG00000243279	PRAF2	163.854	1.44722	0.405371	3.57012	0.000356818	0.0266424	84.4049	76.4578	205.68	269.61	183.117
43	ENSG00000143799	PARP1	178.979	-1.50177	0.424648	-3.53651	0.000405458	0.0276678	318.972	266.894	118.661	63.8207	126.544
44	ENSG00000165632	TAF3	97.2098	-2.04931	0.578039	-3.54527	0.000392209	0.0276678	198.253	159.287	55.3753	14.3271	58.8058
45	ENSG00000168297	PXK	329.53	-1.3607	0.384785	-3.53626	0.000405842	0.0276678	561.391	479.277	122.617	261.795	222.569
46	ENSG00000289942	0	296.35	1.38244	0.389939	3.54527	0.000392215	0.0276678	147.218	155.04	286.106	332.128	561.261
47	ENSG00000152465	NMT2	329.063	-1.29352	0.368354	-3.51162	0.000445378	0.0297172	529.003	492.02	138.438	267.005	218.847
48	ENSG00000107937	GTPBP4	210.266	-1.34063	0.382546	-3.50449	0.00045749	0.0298893	264.011	396.448	131.846	114.617	144.409
49	ENSG00000179031	NSA2P3	262.453	1.79604	0.51606	3.48028	0.000500881	0.0320564	104.034	106.899	382.353	593.923	125.055
50	ENSG00000101460	MAP1LC3A	135.092	1.9479	0.561249	3.47066	0.00051918	0.032563	56.9243	42.4766	213.59	291.752	70.7159
51	ENSG00000244398	RPL36AP37	601.471	1.03697	0.299654	3.46055	0.000539079	0.0331481	403.377	334.149	789.757	815.342	664.729
52	ENSG00000104611	SH2D4A	79.0837	-1.92272	0.556664	-3.454	0.00055234	0.0332574	144.274	139.465	48.783	18.2345	44.6627
53	ENSG00000109113	RAB34	709.787	1.41117	0.410705	3.43596	0.000590459	0.0332574	326.824	383.705	973.023	1410.57	454.815
54	ENSG00000129219	PLD2	208.586	1.92642	0.559133	3.44537	0.000570277	0.0332574	60.8501	94.1564	383.672	419.393	84.859
55	ENSG00000168610	STAT3	410.168	-1.08913	0.317293	-3.43256	0.000597922	0.0332574	566.298	637.149	245.233	281.332	320.827
56	ENSG00000231434	HSP90AA3P	894.422	1.32161	0.384339	3.43867	0.00058458	0.0332574	582.002	359.635	1330.33	1542.12	658.03
57	ENSG00000244879	GABPB1-AS1	166.35	-1.42532	0.415593	-3.42959	0.000604487	0.0332574	311.121	223.71	87.0183	83.3577	126.544
58	ENSG00000182287	AP1S2	466.553	1.13243	0.331849	3.41248	0.000643741	0.0348064	244.382	298.752	688.236	647.325	454.07
59	ENSG00000064042	LIMCH1	83.0274	-1.78248	0.523927	-3.40215	0.000668585	0.034834	175.68	113.271	32.9615	56.0059	37.2189
60	ENSG00000090857	PDPR	135.904	-1.50404	0.444152	-3.38632	0.00070838	0.034834	199.235	245.656	90.9737	52.0986	91.5584
61	ENSG00000108774	RAB5C	761.874	1.10612	0.326444	3.38839	0.000703041	0.034834	492.689	407.775	1029.72	1189.15	690.038
62	ENSG00000118181	RPS25	105.89	-1.58733	0.467795	-3.39322	0.000690756	0.034834	178.624	174.862	40.8722	70.333	64.7609
63	ENSG00000164171	ITGA2	249.913	1.36911	0.404197	3.38724	0.000706007	0.034834	134.459	122.474	313.793	218.814	460.025
64	ENSG00000164292	RHOBTB3	585.283	-1.07285	0.316909	-3.38534	0.000710898	0.034834	832.272	877.141	311.156	416.788	489.056
65	ENSG00000083099	LYRM2	225.762	-1.38127	0.410317	-3.36636	0.000761684	0.0356514	266.955	450.252	122.617	108.104	180.884
66	ENSG00000172403	SYNPO2	136.001	-1.87738	0.556325	-3.37461	0.0007392	0.0356514	256.159	225.834	125.254	32.5616	40.1964
67	ENSG00000240498	CDKN2B-AS1	304.534	1.70178	0.505155	3.36882	0.000754907	0.0356514	161.94	96.9882	548.479	567.874	147.387
68	ENSG00000148153	INIP	85.1449	-1.76408	0.524783	-3.36153	0.000775108	0.0357462	180.587	114.687	31.643	58.6109	40.1964
69	ENSG00000080824	HSP90AA1	6476.35	-0.849136	0.253973	-3.34341	0.00082756	0.037612	7894.81	9773.86	4837.43	5022.3	4853.34
70	ENSG00000105221	AKT2	240.45	1.20504	0.361233	3.3359	0.00085023	0.0379611	120.719	148.668	266.329	356.875	309.661
71	ENSG00000170340	B3GNT2	162.148	1.55435	0.466364	3.3329	0.00085945	0.0379611	88.3308	61.591	251.826	283.937	125.055
72	ENSG00000073712	FERMT2	171.312	-1.3237	0.398248	-3.32381	0.000887977	0.0386763	256.159	280.345	92.2922	93.7774	133.988
73	ENSG00000136819	C9orf78	181.694	-1.23837	0.374245	-3.30898	0.000936356	0.0402248	283.64	271.85	106.795	126.339	119.845
74	ENSG00000110696	C11orf58	351.125	-1.274	0.388484	-3.27941	0.00104026	0.0427795	353.323	730.597	196.45	205.789	269.465
75	ENSG00000130255	RPL36	545.542	-1.4671	0.447866	-3.27577	0.00105376	0.0427795	736.09	1034.3	254.463	154.993	547.862
76	ENSG00000162434	JAK1	241.061	-1.31548	0.400173	-3.28728	0.00101161	0.0427795	330.75	422.642	131.846	109.407	210.659
77	ENSG00000228929	RPS13P2	500.687	1.21784	0.372083	3.27302	0.00106403	0.0427795	316.028	241.409	694.828	849.206	401.964
78	ENSG00000249992	TMEM158	328.406	1.17959	0.359952	3.27706	0.00104894	0.0427795	156.051	217.338	349.392	385.529	533.719
79	ENSG00000060656	PTPRU	74.6122	2.00448	0.615175	3.2584	0.00112044	0.0444773	30.425	22.6542	133.164	140.666	46.1514
80	ENSG00000070814	TCOF1	73.0217	-2.00032	0.61648	-3.24475	0.00117555	0.0458272	137.403	129.554	22.4138	16.932	58.8058
81	ENSG00000133142	TCEAL4	277.055	-1.24952	0.385324	-3.24279	0.00118367	0.0458272	382.767	467.95	164.807	126.339	243.411
82	ENSG00000178074	C2orf69	65.2185	1.95523	0.605396	3.22967	0.00123934	0.0468262	23.5549	24.0701	116.024	113.314	49.1289
83	ENSG00000187840	EIF4EBP1	296.728	1.39186	0.430664	3.23188	0.00122979	0.0468262	141.329	158.579	440.365	543.127	200.238
84	ENSG00000101236	RNF24	125.815	-1.61576	0.505067	-3.1991	0.00137859	0.0514675	180.587	242.824	34.2799	71.6355	99.7466
85	ENSG00000170515	PA2G4	255.725	-1.39502	0.436995	-3.1923	0.00141142	0.0520732	370.008	446.004	123.935	93.7774	244.9
86	ENSG00000104973	MED25	244.707	1.5672	0.492496	3.18215	0.00146184	0.0529517	103.053	121.058	448.276	424.603	126.544
87	ENSG00000113460	BRIX1	151.556	-1.30077	0.409802	-3.17415	0.00150278	0.0529517	251.252	219.462	118.661	82.0552	86.3478
88	ENSG00000122958	VPS26A	67.7212	-1.69327	0.533043	-3.17662	0.00149003	0.0529517	105.997	125.306	40.8722	29.9567	36.4745
89	ENSG00000164609	SLU7	158.546	-1.50683	0.474325	-3.17678	0.00148919	0.0529517	282.658	237.869	73.8337	54.7035	143.665
90	ENSG00000138448	ITGAV	273.354	1.37107	0.43299	3.16651	0.00154278	0.0534385	139.366	140.173	507.607	392.042	187.583
91	ENSG00000184009	ACTG1	7894.99	1.11866	0.353444	3.16503	0.00155067	0.0534385	5055.46	4216.51	11491.7	13287.7	5423.54
92	ENSG00000066322	ELOVL1	130.683	1.49792	0.474656	3.1558	0.00160059	0.053711	65.7573	58.7593	221.501	203.184	104.213
93	ENSG00000115641	FHL2	177.496	1.20402	0.381822	3.15335	0.00161408	0.053711	110.904	88.4929	228.093	239.653	220.336
94	ENSG00000187109	NAP1L1	897.51	-1.04405	0.330375	-3.1602	0.00157659	0.053711	1309.26	1290.58	501.015	510.566	876.132
95	ENSG00000197157	SND1	549.255	1.21066	0.384215	3.15101	0.00162709	0.053711	329.768	283.885	909.737	833.577	389.309
96	ENSG00000152291	TGOLN2	770.59	-0.931399	0.296776	-3.13839	0.0016988	0.054996	967.712	1189.34	597.262	474.097	624.533
97	ENSG00000206418	RAB12	323.073	1.19039	0.379348	3.13799	0.00170109	0.054996	161.94	202.472	428.499	541.825	280.63
98	ENSG00000146223	RPL7L1	415.057	-1.06553	0.340198	-3.13208	0.00173574	0.0555437	656.592	552.196	225.457	368.597	272.442
99	ENSG00000084207	GSTP1	995.208	-1.0442	0.333993	-3.12641	0.00176958	0.0560544	1222.89	1659.42	549.798	587.411	956.525
100	ENSG00000088832	FKBP1A	382.706	0.987072	0.316309	3.1206	0.00180485	0.0566002	240.456	241.409	474.645	428.511	528.508
101	ENSG00000198900	TOP1	530.271	0.979121	0.316202	3.09651	0.00195816	0.0607998	377.859	293.088	627.587	575.689	777.13
102	ENSG00000125520	SLC2A4RG	78.0132	-1.58658	0.513821	-3.08781	0.00201634	0.0619926	112.867	147.252	51.4199	33.8641	44.6627
103	ENSG00000101361	NOP56	316.969	-1.14874	0.373996	-3.07152	0.00212969	0.0646887	471.097	475.738	148.986	197.974	291.052
104	ENSG00000242137	RPL11P5	195.802	1.65963	0.540712	3.06934	0.00214529	0.0646887	111.886	58.7593	251.826	449.35	107.19
105	ENSG00000117984	CTSD	565.553	-1.0854	0.354745	-3.05967	0.00221578	0.0653701	594.76	1062.62	333.57	347.758	489.056
106	ENSG00000185825	BCAP31	122	-1.48259	0.484172	-3.06211	0.00219781	0.0653701	135.44	261.939	71.1968	52.0986	89.3253
107	ENSG00000196923	PDLIM7	2932.71	1.21094	0.396029	3.0577	0.00223042	0.0653701	1748.95	1529.16	4646.25	5082.21	1656.98
108	ENSG00000160539	PLPP7	94.9494	1.82977	0.599766	3.05081	0.00228222	0.065866	25.5178	48.8481	180.629	165.413	54.3396
109	ENSG00000218426	0	254.214	1.2935	0.424115	3.04988	0.00228935	0.065866	151.144	120.35	367.85	444.14	187.583
110	ENSG00000089009	RPL6	269.108	-1.17701	0.386984	-3.04149	0.00235411	0.0665089	327.805	482.109	160.852	138.061	236.712
111	ENSG00000226396	0	211.953	1.27997	0.420828	3.04155	0.00235363	0.0665089	138.385	89.9088	315.112	334.733	181.628
112	ENSG00000089737	DDX24	402.418	-1.00442	0.331202	-3.03265	0.00242413	0.0678757	480.912	669.714	332.252	260.493	268.72
113	ENSG00000092964	DPYSL2	351.608	1.20923	0.4001	3.02231	0.00250855	0.0691842	195.309	197.516	522.11	590.016	253.088
114	ENSG00000171812	COL8A2	396.246	1.55407	0.514332	3.02153	0.00251499	0.0691842	180.587	185.481	605.173	854.416	155.575
115	ENSG00000230629	RPS23P8	471.191	1.40453	0.465808	3.01525	0.00256771	0.0700203	256.159	217.338	812.171	843.997	226.291
116	ENSG00000132842	AP3B1	103.221	-1.48331	0.494473	-2.99977	0.00270182	0.072851	116.793	219.462	54.0568	52.0986	73.6934
117	ENSG00000157227	MMP14	2036.08	1.02575	0.342843	2.9919	0.00277244	0.072851	1323.98	1186.51	2853.15	3316.07	1500.67
118	ENSG00000161011	SQSTM1	847.353	0.945475	0.315844	2.99349	0.0027581	0.072851	562.372	526.71	955.883	1366.28	825.515
119	ENSG00000171490	RSL1D1	183.394	-1.11409	0.372577	-2.99023	0.00278767	0.072851	257.141	284.593	116.024	128.944	130.266
120	ENSG00000175203	DCTN2	788.493	1.26666	0.422625	2.99713	0.00272534	0.072851	424.969	429.721	1083.77	1555.14	448.86
121	ENSG00000177469	CAVIN1	9236.67	-0.726825	0.244315	-2.97495	0.00293034	0.0759465	11675.4	12550.4	7465.12	7331.57	7160.91
122	ENSG00000124486	USP9X	301.436	1.17388	0.395489	2.96817	0.00299581	0.0770071	196.291	147.252	470.69	453.257	239.69
123	ENSG00000129235	TXNDC17	74.8994	1.58191	0.533906	2.96289	0.00304762	0.0770754	42.2025	26.1939	108.114	114.617	83.3703
124	ENSG00000143761	ARF1	417.953	1.25423	0.423074	2.96456	0.00303112	0.0770754	294.436	162.119	541.887	780.176	311.15
125	ENSG00000109332	UBE2D3	848.224	0.950148	0.321132	2.95875	0.00308893	0.0774951	480.912	605.999	1234.08	1163.1	757.032
126	ENSG00000112902	SEMA5A	193.13	-1.30109	0.442227	-2.94213	0.00325966	0.0798617	279.714	322.114	94.9291	82.0552	186.839
127	ENSG00000227051	C14orf132	68.2394	-1.80759	0.613791	-2.94496	0.00322996	0.0798617	87.3493	151.5	15.8215	50.7961	35.7301
128	ENSG00000243680	RPL37P23	800.117	1.30652	0.443803	2.94392	0.00324088	0.0798617	477.968	370.962	1303.96	1450.94	396.753
129	ENSG00000137815	RTF1	209.22	-1.19216	0.406476	-2.93291	0.00335799	0.0814117	324.861	307.955	92.2922	134.154	186.839
130	ENSG00000197061	H4C3	758.411	1.15336	0.393458	2.93136	0.00337485	0.0814117	499.559	374.502	1198.48	1228.22	491.289
131	ENSG00000111678	C12orf57	114.126	1.44856	0.494809	2.9275	0.00341695	0.0817981	60.8501	50.9719	164.807	203.184	90.8141
132	ENSG00000100030	MAPK1	217.134	1.25374	0.429605	2.91836	0.0035188	0.0823505	128.57	108.315	300.609	382.924	165.252
133	ENSG00000107438	PDLIM1	100.835	1.35975	0.465927	2.91838	0.00351858	0.0823505	61.8315	42.4766	137.12	125.037	137.71
134	ENSG00000131043	AAR2	66.733	1.76866	0.605763	2.91972	0.00350348	0.0823505	30.425	24.0701	127.891	102.895	48.3845
135	ENSG00000111145	ELK3	688.044	1.25423	0.433344	2.8943	0.00380009	0.0882747	416.136	334.857	1054.77	1265.99	368.467
136	ENSG00000185236	RAB11B	106.82	1.33839	0.463254	2.88911	0.00386338	0.089085	68.7017	43.1845	138.438	134.154	149.62
137	ENSG00000278487	0	272.568	1.39125	0.481989	2.88649	0.00389571	0.0891748	135.44	140.173	477.282	471.492	138.454
138	ENSG00000109861	CTSC	223.789	-1.3632	0.472874	-2.8828	0.00394156	0.0894661	335.657	373.086	83.0629	91.1725	235.968
139	ENSG00000132475	H3-3B	1415.21	0.930763	0.323081	2.88089	0.00396549	0.0894661	885.27	947.228	1951.32	2145.16	1147.09
140	ENSG00000067225	PKM	3942.05	0.795006	0.276531	2.87493	0.00404122	0.0902086	3073.91	2397.09	5101.12	5224.18	3913.94
141	ENSG00000104388	RAB2A	617.552	0.941457	0.327603	2.87378	0.00405593	0.0902086	459.32	336.273	853.043	862.231	576.893
142	ENSG00000136026	CKAP4	1777.03	-0.758563	0.2644	-2.869	0.00411778	0.090939	2158.21	2550.72	1361.97	1490.02	1324.25
143	ENSG00000125354	SEPTIN6	167.118	1.15685	0.40417	2.86229	0.00420587	0.0909628	86.3678	105.484	208.317	260.493	174.929
144	ENSG00000149269	PAK1	507.841	1.07203	0.374355	2.86367	0.00418763	0.0909628	306.213	304.415	715.923	837.484	375.166
145	ENSG00000151247	EIF4E	134.569	1.30783	0.456375	2.86569	0.00416101	0.0909628	68.7017	73.6261	185.903	229.234	115.379
146	ENSG00000140564	FURIN	345.75	1.2094	0.424257	2.85064	0.00436311	0.0924507	205.124	181.233	589.351	532.708	220.336
147	ENSG00000198832	SELENOM	93.6545	-1.59529	0.559292	-2.85234	0.0043399	0.0924507	117.774	195.392	69.8783	23.4443	61.7833
148	ENSG00000240950	0	319.921	1.45823	0.510987	2.85376	0.00432047	0.0924507	190.402	121.766	431.136	705.935	150.364
149	ENSG00000067167	TRAM1	164.524	-1.20062	0.422247	-2.8434	0.00446344	0.0932689	261.066	236.453	79.1076	148.481	97.5135
150	ENSG00000080845	DLGAP4	736.787	1.20211	0.42641	2.81914	0.00481522	0.0932689	393.563	433.261	1227.49	1237.34	392.287
151	ENSG00000099956	SMARCB1	198.413	1.36505	0.484242	2.81895	0.0048181	0.0932689	89.3122	113.979	384.99	283.937	119.845
152	ENSG00000104643	MTMR9	92.6939	1.34914	0.474988	2.84036	0.00450631	0.0932689	47.1097	48.8481	123.935	139.364	104.213
153	ENSG00000112773	TENT5A	379.333	1.09137	0.385397	2.8318	0.00462865	0.0932689	219.845	231.497	682.962	457.165	305.195
154	ENSG00000132963	POMP	581.237	0.874922	0.308507	2.83599	0.00456845	0.0932689	417.117	357.511	711.968	827.065	592.525
155	ENSG00000133612	AGAP3	205.756	1.16577	0.41083	2.83759	0.00454556	0.0932689	104.034	130.969	352.029	257.888	183.861
156	ENSG00000134086	VHL	118.034	-1.23723	0.438839	-2.81933	0.00481235	0.0932689	191.383	169.906	61.9676	76.8454	90.0697
157	ENSG00000168140	VASN	168.552	-1.30745	0.46031	-2.84036	0.00450629	0.0932689	311.121	215.215	68.5599	88.5675	159.297
158	ENSG00000173575	CHD2	243.362	-1.0436	0.369975	-2.82072	0.00479155	0.0932689	407.303	298.044	163.489	143.271	204.704
159	ENSG00000182492	BGN	1003.66	1.27689	0.452694	2.82064	0.00479277	0.0932689	593.779	488.481	1572.92	1906.81	456.303
160	ENSG00000198712	MT-CO2	1963.96	-1.04647	0.370462	-2.82476	0.00473155	0.0932689	3246.65	2444.53	940.062	1022.43	2166.14
161	ENSG00000198763	MT-ND2	2698.13	0.977842	0.345703	2.82856	0.00467578	0.0932689	1920.7	1492.34	2640.87	2433	5003.71
162	ENSG00000275052	PPP4R3B	279.706	1.19688	0.422664	2.83176	0.00462932	0.0932689	150.162	164.243	404.767	485.819	193.538
163	ENSG00000110700	RPS13	328.523	1.10094	0.390886	2.81653	0.00485453	0.0933976	142.311	247.072	352.029	339.943	561.261
164	ENSG00000131051	RBM39	2384.8	1.00014	0.356326	2.80681	0.00500341	0.095675	1504.57	1475.35	3420.08	3913.9	1610.09
165	ENSG00000119812	FAM98A	689.251	1.23894	0.44226	2.80138	0.00508839	0.0967102	423.006	335.565	1034.99	1299.86	352.835
166	ENSG00000022277	RTF2	220.92	-1.0165	0.363657	-2.79523	0.00518634	0.0968117	315.046	318.574	155.578	183.647	131.755
167	ENSG00000163359	COL6A3	3337.22	-0.795803	0.284557	-2.79664	0.00516372	0.0968117	4765.93	4187.48	2362.68	2138.65	3231.34
168	ENSG00000166710	B2M	855.353	-0.840656	0.300619	-2.79641	0.00516733	0.0968117	1225.83	1102.98	620.994	532.708	794.251
169	ENSG00000121851	POLR3GL	73.986	-1.44174	0.516508	-2.79132	0.00524936	0.0968353	134.459	104.068	48.783	36.469	46.1514
170	ENSG00000165912	PACSIN3	168.578	1.58284	0.567026	2.79147	0.00524694	0.0968353	79.4977	73.6261	184.584	423.301	81.8815
171	ENSG00000154146	NRGN	85.1296	1.70667	0.612051	2.78845	0.00529613	0.0971267	34.3508	37.521	112.069	194.067	47.6402
172	ENSG00000119801	YPEL5	130.936	1.43391	0.514983	2.78438	0.00536309	0.0977828	64.7759	64.4228	170.081	268.308	87.0922
173	ENSG00000126870	DYNC2I1	66.2019	-1.61944	0.582844	-2.7785	0.00546097	0.0989919	109.923	113.271	36.9169	19.537	51.3621
174	ENSG00000123200	ZC3H13	508.019	-0.886785	0.319835	-2.77263	0.0055605	0.0996713	739.034	664.758	346.755	319.104	470.447
175	ENSG00000172301	COPRS	221.539	0.993503	0.358336	2.77254	0.00556201	0.0996713	149.181	128.846	303.246	253.98	272.442
176	ENSG00000044574	HSPA5	1337.44	0.792843	0.287447	2.75823	0.0058116	0.101817	795.958	1061.21	1650.71	1794.8	1384.54
177	ENSG00000117228	GBP1	72.3428	-1.71228	0.620033	-2.7616	0.00575186	0.101817	117.774	131.677	19.7769	24.7468	67.7384
178	ENSG00000144810	COL8A1	705.67	1.23671	0.448101	2.7599	0.00578198	0.101817	461.283	316.451	1023.12	1364.98	362.512
179	ENSG00000166313	APBB1	126.202	1.72722	0.624971	2.76369	0.00571523	0.101817	55.9428	49.556	188.54	293.054	43.9183
180	ENSG00000007384	RHBDF1	164.96	1.35534	0.493258	2.74773	0.00600095	0.103426	81.4606	88.4929	296.653	259.19	99.0022
181	ENSG00000042493	CAPG	278.851	1.18596	0.431487	2.74854	0.00598616	0.103426	121.7	193.268	450.913	431.116	197.26
182	ENSG00000164091	WDR82	263.067	-1.03232	0.375957	-2.74585	0.00603537	0.103426	450.487	309.371	141.075	194.067	220.336
183	ENSG00000224411	HSP90AA2P	200.623	1.06803	0.388846	2.74666	0.00602047	0.103426	114.83	126.722	319.067	242.258	200.238
184	ENSG00000068308	OTUD5	235.469	1.14845	0.41896	2.74119	0.00612165	0.103713	117.774	153.624	365.213	362.085	178.651
185	ENSG00000130770	ATP5IF1	152.695	1.18312	0.431845	2.73969	0.00614965	0.103713	68.7017	104.068	162.17	251.376	177.162
186	ENSG00000153815	CMIP	169.494	1.12084	0.409389	2.73784	0.00618444	0.103713	97.1638	101.236	249.189	243.561	156.319
187	ENSG00000167670	CHAF1A	151.518	-1.11142	0.405771	-2.73902	0.00616219	0.103713	242.419	204.596	123.935	89.87	96.7691
188	ENSG00000105677	TMEM147	577.651	1.02511	0.374794	2.73512	0.0062358	0.104018	320.935	390.785	771.299	979.453	425.784
189	ENSG00000035862	TIMP2	1322.5	0.83168	0.304524	2.73108	0.0063127	0.104193	850.92	950.059	1707.4	1930.25	1173.88
190	ENSG00000235137	HSP90AB6P	271.836	1.39219	0.509585	2.73201	0.00629485	0.104193	182.55	92.7405	416.633	528.8	138.454
191	ENSG00000228657	RPL23AP58	267.952	1.18186	0.433056	2.72912	0.00635037	0.104266	173.717	130.262	423.225	432.418	180.139
192	ENSG00000132466	ANKRD17	267.395	-0.960364	0.352165	-2.72703	0.0063907	0.104381	357.249	398.572	171.4	174.53	235.223
193	ENSG00000240038	AMY2B	2662.41	1.13931	0.418167	2.72453	0.00643934	0.104631	1357.35	1734.46	4383.88	4498.71	1337.65
194	ENSG00000006125	AP2B1	233.475	1.05546	0.38814	2.71928	0.00654244	0.105216	104.034	179.11	275.558	267.005	341.669
195	ENSG00000139132	FGD4	82.7672	1.56004	0.57346	2.7204	0.00652034	0.105216	36.3138	39.6448	135.801	148.481	53.5952
196	ENSG00000134897	BIVM	69.9676	-1.61718	0.59578	-2.7144	0.00663963	0.106234	96.1824	139.465	40.8722	18.2345	55.0839
197	ENSG00000131473	ACLY	195.139	1.0815	0.399392	2.70786	0.00677176	0.107557	112.867	120.35	295.335	272.215	174.929
198	ENSG00000169851	PCDH7	185.227	1.0301	0.380542	2.70693	0.00679094	0.107557	105.997	121.766	201.724	264.4	232.246
199	ENSG00000154945	ANKRD40	65.3677	1.59286	0.58993	2.70009	0.00693214	0.108696	37.2952	21.9462	109.432	101.592	56.5727
200	ENSG00000225200	0	100.12	1.38711	0.513568	2.70092	0.00691486	0.108696	62.813	38.9369	130.527	179.74	88.5809
201	ENSG00000100292	HMOX1	78.2144	1.40439	0.521486	2.69305	0.00708023	0.110236	41.221	37.521	130.527	76.8454	104.957
202	ENSG00000117411	B4GALT2	825.464	1.06657	0.39675	2.68827	0.00718232	0.110236	434.784	560.691	1234.08	1387.12	510.643
203	ENSG00000130402	ACTN4	338.139	-1.05427	0.39225	-2.68775	0.00719358	0.110236	579.057	404.235	224.138	154.993	328.271
204	ENSG00000135250	SRPK2	156.883	-1.24257	0.462409	-2.68717	0.00720613	0.110236	264.011	216.631	130.527	53.401	119.845
205	ENSG00000136379	ABHD17C	194.546	1.37822	0.51255	2.68895	0.0071677	0.110236	82.442	115.395	299.29	375.11	100.491
206	ENSG00000004534	RBM6	79.8779	-1.35886	0.511016	-2.65914	0.007834	0.11327	123.663	128.846	51.4199	35.1665	60.2946
207	ENSG00000011007	ELOA	76.758	-1.31956	0.497056	-2.65475	0.00793671	0.11327	123.663	116.103	46.1461	49.4936	48.3845
208	ENSG00000078369	GNB1	1326.38	1.05288	0.394472	2.66908	0.00760599	0.11327	769.459	842.452	1775.96	2446.03	797.973
209	ENSG00000092199	HNRNPC	277.461	-1.16061	0.435118	-2.66734	0.0076454	0.11327	381.785	449.544	89.6552	210.999	255.322
210	ENSG00000100097	LGALS1	21362.4	0.966536	0.364976	2.64822	0.00809178	0.11327	12533.2	14636	31198.7	35179.5	13264.8
211	ENSG00000136240	KDELR2	248.575	1.12452	0.424698	2.64781	0.00810153	0.11327	129.552	160.703	362.576	412.881	177.162
212	ENSG00000136830	NIBAN2	247.935	0.957341	0.36213	2.64364	0.0082021	0.11327	144.274	172.738	283.469	267.005	372.189
213	ENSG00000164054	SHISA5	113.822	1.24446	0.468679	2.65526	0.00792483	0.11327	52.017	72.9181	108.114	153.691	182.373
214	ENSG00000171159	BBLN	178.83	1.39638	0.528188	2.64372	0.00820011	0.11327	111.886	68.6705	338.844	283.937	90.8141
215	ENSG00000171552	BCL2L1	287.046	1.1923	0.450582	2.64612	0.00814198	0.11327	213.957	110.439	274.24	578.294	258.299
216	ENSG00000173821	RNF213	158.549	-1.11081	0.417635	-2.65976	0.00781973	0.11327	284.621	184.065	100.203	95.0799	128.777
217	ENSG00000177707	NECTIN3	295.351	0.875292	0.329069	2.6599	0.00781631	0.11327	203.161	190.437	369.169	373.807	340.181
218	ENSG00000180189	HMGB1P14	170.115	1.46412	0.55235	2.65071	0.00803228	0.11327	95.2009	70.0864	275.558	336.036	73.6934
219	ENSG00000196642	RABL6	187.699	-1.05148	0.393376	-2.67297	0.00751829	0.11327	298.362	247.072	127.891	102.895	162.274
220	ENSG00000197756	RPL37A	1285.47	0.801468	0.300266	2.66919	0.0076034	0.11327	720.386	1057.67	1533.37	1327.21	1788.74
221	ENSG00000214286	PDCL3P3	97.0575	1.43949	0.540746	2.66204	0.00776678	0.11327	28.4621	66.5466	145.031	158.901	86.3478
222	ENSG00000216412	RPL12P2	1707.93	1.12943	0.426202	2.64998	0.00804958	0.11327	919.621	1073.95	2663.29	3049.07	833.703
223	ENSG00000230359	TPI1P2	96.5065	1.59829	0.600271	2.66261	0.00775381	0.11327	52.9985	33.9813	166.126	181.042	48.3845
224	ENSG00000230989	HSBP1	335.391	1.09998	0.41442	2.65427	0.00794807	0.11327	206.105	191.145	498.378	558.757	222.569
225	ENSG00000234742	0	177.189	1.06088	0.399348	2.65653	0.00789497	0.11327	115.811	99.112	247.87	169.32	253.833
226	ENSG00000244053	RPL13AP2	305.101	1.36961	0.517881	2.64464	0.00817781	0.11327	208.068	104.776	417.952	647.325	147.387
227	ENSG00000244405	ETV5	86.7056	1.38611	0.51805	2.67563	0.00745896	0.11327	46.1283	41.7686	130.527	140.666	74.4378
228	ENSG00000266944	0	201.398	1.03279	0.39087	2.64227	0.00823518	0.11327	121.7	125.306	296.653	278.727	184.606
229	ENSG00000128524	ATP6V1F	185.448	1.07795	0.408469	2.639	0.00831507	0.113869	82.442	139.465	208.317	277.425	219.591
230	ENSG00000070614	NDST1	352.763	0.972312	0.368825	2.63624	0.00838306	0.114301	205.124	241.409	450.913	567.874	298.495
231	ENSG00000089006	SNX5	117.37	-1.20565	0.458631	-2.62881	0.00856847	0.114452	193.346	162.827	87.0183	52.0986	91.5584
232	ENSG00000105974	CAV1	936.855	-0.781354	0.297136	-2.62961	0.00854818	0.114452	1354.4	1148.28	706.694	601.738	873.155
233	ENSG00000118873	RAB3GAP2	171.09	-1.0919	0.415441	-2.6283	0.00858141	0.114452	304.25	198.224	90.9737	140.666	121.334
234	ENSG00000157657	ZNF618	157.146	1.0579	0.40208	2.63108	0.00851141	0.114452	91.2751	99.112	237.323	171.925	186.094
235	ENSG00000175352	NRIP3	92.1228	1.31796	0.500928	2.63104	0.00851245	0.114452	45.1468	51.6798	123.935	154.993	84.859
236	ENSG00000213970	0	107.071	1.62398	0.61818	2.62704	0.00861311	0.114452	29.4436	65.1308	105.477	268.308	66.994
237	ENSG00000127838	PNKD	134.656	1.41288	0.538529	2.62359	0.00870088	0.115131	62.813	71.5022	208.317	259.19	71.4602
238	ENSG00000111670	GNPTAB	129.321	-1.11042	0.42383	-2.61997	0.00879367	0.115868	173.717	208.135	73.8337	91.1725	99.7466
239	ENSG00000127184	COX7C	209.849	0.936305	0.357567	2.61855	0.00883051	0.115868	131.515	139.465	268.966	253.98	255.322
240	ENSG00000162063	CCNF	248.947	1.1213	0.429056	2.61342	0.00896421	0.117132	111.886	179.11	408.722	358.178	186.839
241	ENSG00000131016	AKAP12	874.271	-0.943731	0.361447	-2.61098	0.00902824	0.11748	1215.04	1243.15	497.059	450.652	965.458
242	ENSG00000082482	KCNK2	108.319	1.24336	0.479746	2.59171	0.00954991	0.119317	71.6461	47.4322	179.31	136.759	106.446
243	ENSG00000084623	EIF3I	182.094	-1.13828	0.437996	-2.59885	0.00935374	0.119317	271.862	271.142	88.3368	93.7774	185.35
244	ENSG00000087269	NOP14	108.878	-1.21242	0.467406	-2.59394	0.00948822	0.119317	156.051	174.862	80.426	48.1912	84.859
245	ENSG00000135931	ARMC9	87.4354	-1.35494	0.521902	-2.59615	0.00942747	0.119317	162.921	113.271	32.9615	62.5183	65.5052
246	ENSG00000137573	SULF1	77.7848	-1.3233	0.508694	-2.60136	0.00928538	0.119317	127.589	116.103	38.2353	48.1912	58.8058
247	ENSG00000138107	ACTR1A	970.294	0.843303	0.325239	2.59287	0.00951778	0.119317	612.427	700.864	1319.78	1419.69	798.717
248	ENSG00000166164	BRD7	141.977	-1.05905	0.408623	-2.59176	0.00954864	0.119317	219.845	193.268	105.477	83.3577	107.935
249	ENSG00000174579	MSL2	102.913	1.37901	0.531339	2.59535	0.00944956	0.119317	42.2025	62.299	104.158	213.604	92.3028
250	ENSG00000197045	GMFB	97.0348	1.4585	0.561358	2.59816	0.00937256	0.119317	63.7944	31.1495	94.9291	204.487	90.8141
251	ENSG00000198242	RPL23A	1431.59	-0.739289	0.284386	-2.5996	0.00933335	0.119317	1751.89	2016.93	1288.13	1183.94	917.073
252	ENSG00000107581	EIF3A	1969.68	-0.71334	0.275696	-2.58742	0.00966987	0.11986	2531.17	2613.02	1578.2	1298.56	1827.45
253	ENSG00000111716	LDHB	381.737	0.872981	0.337268	2.58839	0.00964249	0.11986	253.215	255.567	527.384	519.683	352.835
254	ENSG00000128710	HOXD10	308.086	1.21205	0.468794	2.58546	0.00972485	0.120067	165.866	177.694	557.708	480.609	158.552
255	ENSG00000135698	MPHOSPH6	213.809	-1.03564	0.400821	-2.5838	0.00977195	0.120086	296.399	322.114	141.075	105.5	203.959
256	ENSG00000196396	PTPN1	727.823	1.055	0.408488	2.5827	0.00980296	0.120086	443.617	439.633	1056.09	1277.72	422.062
257	ENSG00000028277	POU2F2	118.934	1.55452	0.602821	2.57875	0.00991589	0.120997	69.6832	41.0607	85.6999	88.5675	309.661
258	ENSG00000076108	BAZ2A	214.088	-1.07767	0.418353	-2.57597	0.00999586	0.1215	291.491	334.857	85.6999	179.74	178.651
259	ENSG00000104695	PPP2CB	411.368	0.948878	0.368954	2.57181	0.0101169	0.121558	253.215	273.974	624.95	586.109	318.594
260	ENSG00000131507	NDFIP1	401.824	1.04858	0.407578	2.5727	0.0100908	0.121558	251.252	237.869	489.148	750.219	280.63
261	ENSG00000133816	MICAL2	125.747	1.17153	0.455197	2.57368	0.0100623	0.121558	54.9614	88.4929	137.12	147.178	200.982
262	ENSG00000127884	ECHS1	218.724	0.965114	0.376152	2.56575	0.0102952	0.12276	125.626	152.208	263.692	329.523	222.569
263	ENSG00000225137	DYNC1I2P1	191.114	1.20115	0.468039	2.56634	0.0102779	0.12276	60.8501	152.916	270.284	299.567	171.951
264	ENSG00000227081	0	764.998	1.06947	0.417168	2.56365	0.0103577	0.123037	494.652	426.89	1012.58	1450.94	439.927
265	ENSG00000136279	DBNL	145.25	-1.19479	0.467262	-2.55699	0.0105581	0.124945	201.198	238.577	54.0568	97.6848	134.732
266	ENSG00000068489	PRR11	442.383	-0.817798	0.321067	-2.54712	0.0108615	0.12536	561.391	632.901	412.678	303.474	301.473
267	ENSG00000079432	CIC	442.582	1.0701	0.420816	2.54292	0.010993	0.12536	296.399	236.453	615.721	791.898	272.442
268	ENSG00000086015	MAST2	251.469	1.34866	0.529763	2.54578	0.0109033	0.12536	165.866	94.8644	370.487	514.473	111.657
269	ENSG00000118217	ATF6	104.065	-1.24161	0.486197	-2.55371	0.0106581	0.12536	139.366	179.818	60.6491	48.1912	92.3028
270	ENSG00000138758	SEPTIN11	3231.19	-0.639168	0.250722	-2.54931	0.0107936	0.12536	3920.9	4308.54	2673.84	2641.4	2611.28
271	ENSG00000156052	GNAQ	190.552	1.20743	0.474033	2.54714	0.0108611	0.12536	116.793	96.2802	280.832	341.246	117.612
272	ENSG00000156411	ATP5MJ	405.45	0.846438	0.332332	2.54697	0.0108664	0.12536	281.677	266.187	530.021	570.479	378.888
273	ENSG00000157916	RER1	124.075	1.14875	0.451719	2.54307	0.0109882	0.12536	55.9428	87.077	189.858	128.944	158.552
274	ENSG00000162493	PDPN	238.581	1.15474	0.453975	2.54363	0.0109708	0.12536	138.385	135.925	365.213	408.974	144.409
275	ENSG00000233839	0	532.388	1.18076	0.462705	2.55185	0.0107151	0.12536	314.065	290.257	833.266	979.453	244.9
276	ENSG00000115216	NRBP1	204.142	1.13196	0.446154	2.53716	0.0111757	0.126982	112.867	124.598	266.329	372.505	144.409
277	ENSG00000112473	SLC39A7	228.215	-1.17949	0.466714	-2.52722	0.0114968	0.128306	279.714	407.067	205.68	67.7281	180.884
278	ENSG00000131711	MAP1B	2168.82	-0.770796	0.304889	-2.52812	0.0114675	0.128306	2955.15	2817.61	1361.97	1440.52	2268.86
279	ENSG00000167881	SRP68	64.494	1.48388	0.586312	2.53087	0.011378	0.128306	31.4065	30.4415	117.343	91.1725	52.1064
280	ENSG00000214182	PTMAP5	160.855	1.42083	0.562062	2.52789	0.0114751	0.128306	97.1638	63.0069	239.96	333.431	70.7159
281	ENSG00000227836	0	2085.54	1.09023	0.431201	2.52837	0.0114594	0.128306	1309.26	1176.6	3235.5	3739.37	966.946
282	ENSG00000175573	C11orf68	264.174	1.13549	0.449827	2.52429	0.0115933	0.128924	158.995	147.96	461.461	394.647	157.808
283	ENSG00000092010	PSME1	122.651	-1.16288	0.461524	-2.51965	0.0117472	0.128954	175.68	192.56	72.5153	58.6109	113.89
284	ENSG00000099817	POLR2E	280.842	0.902941	0.358149	2.52113	0.0116977	0.128954	198.253	171.322	371.806	263.098	399.731
285	ENSG00000130312	MRPL34	216.904	1.12292	0.445736	2.51925	0.0117605	0.128954	149.181	104.776	378.398	299.567	152.597
286	ENSG00000133895	MEN1	136.989	1.40121	0.55584	2.52088	0.0117062	0.128954	69.6832	67.9625	189.858	290.449	66.994
287	ENSG00000102401	ARMCX3	143.753	1.06112	0.421767	2.51589	0.0118733	0.129287	90.2937	83.5373	177.992	224.024	142.92
288	ENSG00000210144	MT-TY	130.029	-1.26122	0.50127	-2.51606	0.0118676	0.129287	243.4	156.455	47.4645	127.641	75.1821
289	ENSG00000132005	RFX1	297.235	1.11018	0.441488	2.51464	0.0119155	0.129297	165.866	184.065	514.199	444.14	177.906
290	ENSG00000183199	HSP90AB3P	126.524	1.21935	0.485404	2.51203	0.0120038	0.129806	80.4791	60.1752	229.412	162.808	99.7466
291	ENSG00000106244	PDAP1	280.156	-0.878245	0.35171	-2.49707	0.0125223	0.134486	367.063	404.943	216.227	165.413	247.133
292	ENSG00000166741	NNMT	279.778	-1.03511	0.414338	-2.49823	0.0124813	0.134486	298.362	510.427	156.897	151.086	282.119
293	ENSG00000173320	STOX2	95.7714	1.4436	0.579307	2.49195	0.0127044	0.135976	52.9985	41.0607	138.438	192.765	53.5952
294	ENSG00000147419	CCDC25	223.069	-0.957352	0.384378	-2.49065	0.012751	0.136011	241.437	387.953	162.17	140.666	183.117
295	ENSG00000058262	SEC61A1	1672.44	0.917999	0.368865	2.48871	0.0128206	0.13629	1059.97	1119.97	2656.7	2465.56	1059.99
296	ENSG00000104738	MCM4	261.931	-1.18537	0.477141	-2.48431	0.0129803	0.137521	421.043	366.714	166.126	281.332	74.4378
297	ENSG00000116489	CAPZA1	274.667	0.892318	0.36062	2.4744	0.013346	0.139977	174.699	187.605	375.761	382.924	252.344
298	ENSG00000177156	TALDO1	330.019	0.876208	0.353952	2.4755	0.013305	0.139977	218.864	220.17	468.053	451.955	291.052
299	ENSG00000264364	DYNLL2	1544.21	0.946854	0.382297	2.47675	0.0132586	0.139977	1053.1	930.237	2332.35	2478.59	926.75
300	ENSG00000089693	MLF2	343.66	0.938417	0.381301	2.4611	0.0138514	0.140122	185.495	256.983	545.842	449.35	280.63
301	ENSG00000100138	SNU13	165.639	1.03	0.418442	2.46151	0.0138353	0.140122	125.626	78.5817	251.826	177.135	195.027
302	ENSG00000101182	PSMA7	1120.87	-0.69049	0.280447	-2.46211	0.0138123	0.140122	1247.43	1656.59	936.106	889.583	874.644
303	ENSG00000103550	KNOP1	102.409	-1.43465	0.582266	-2.4639	0.0137434	0.140122	186.476	144.42	38.2353	31.2591	111.657
304	ENSG00000113456	RAD1	87.3965	-1.24025	0.502393	-2.46869	0.0135609	0.140122	103.053	164.243	44.8276	63.8207	61.039
305	ENSG00000126012	KDM5C	87.9636	1.22413	0.497149	2.46229	0.0138051	0.140122	59.8686	38.2289	98.8844	113.314	129.522
306	ENSG00000141696	P3H4	202.703	-0.952604	0.385292	-2.47242	0.0134202	0.140122	244.382	325.654	174.037	151.086	118.356
307	ENSG00000167601	AXL	717.331	0.86656	0.351518	2.46519	0.0136941	0.140122	548.632	411.315	929.514	1129.24	567.96
308	ENSG00000168528	SERINC2	400.428	0.80362	0.325531	2.46864	0.0135627	0.140122	232.604	319.99	523.428	488.424	437.694
309	ENSG00000174442	ZWILCH	78.0765	1.35691	0.550879	2.46317	0.0137713	0.140122	51.0355	29.7336	90.9737	141.969	76.6709
310	ENSG00000214144	0	224.18	1.02457	0.414576	2.47136	0.0134601	0.140122	137.403	139.465	167.444	354.27	322.315
311	ENSG00000175029	CTBP2	586	0.949103	0.386724	2.45421	0.0141193	0.142374	366.082	385.121	820.082	971.638	387.076
312	ENSG00000167693	NXN	194.858	-1.04138	0.424547	-2.45292	0.0141702	0.142429	279.714	285.301	98.8844	109.407	200.982
313	ENSG00000120686	UFM1	96.0354	1.1757	0.479834	2.45023	0.0142763	0.143037	62.813	46.7242	151.623	108.104	110.912
314	ENSG00000140416	TPM1	1771.04	-0.68954	0.281685	-2.44792	0.0143685	0.143502	2324.08	2265.42	1248.58	1273.81	1743.33
315	ENSG00000170035	UBE2E3	103.631	1.24759	0.510292	2.44485	0.0144911	0.144266	50.0541	63.0069	170.081	157.598	77.4153
316	ENSG00000143319	ISG20L2	106.077	-1.35315	0.554049	-2.44229	0.0145944	0.144378	105.997	228.666	73.8337	32.5616	89.3253
317	ENSG00000196639	HRH1	72.7908	-1.39136	0.569655	-2.44247	0.0145872	0.144378	94.2195	136.633	35.5984	67.7281	29.7751
318	ENSG00000171992	SYNPO	1124.69	1.12972	0.462842	2.44084	0.0146531	0.144503	765.533	547.24	1673.12	2158.18	479.379
319	ENSG00000105372	RPS19	1124.18	0.672363	0.275596	2.43967	0.0147006	0.144518	800.865	857.319	1212.98	1254.27	1495.45
320	ENSG00000105576	TNPO2	1033.59	1.04085	0.426961	2.43782	0.0147762	0.144807	643.833	620.158	1521.5	1865.13	517.342
321	ENSG00000214047	RPS11P7	728.671	1.1651	0.478327	2.43578	0.0148595	0.14517	448.524	385.829	1189.25	1332.42	287.33
322	ENSG00000184900	SUMO3	447.187	0.782123	0.32134	2.43394	0.0149353	0.145457	285.603	338.397	642.09	505.356	464.492
323	ENSG00000074800	ENO1	901.299	-0.811909	0.333928	-2.43139	0.015041	0.145582	939.25	1491.64	667.14	535.313	873.155
324	ENSG00000204356	NELFE	545.565	0.967655	0.397947	2.43162	0.0150314	0.145582	409.266	283.885	796.349	876.558	361.768
325	ENSG00000161016	RPL8	7016.82	0.903569	0.37213	2.4281	0.0151781	0.146457	4237.91	4978.96	10109.9	11551.6	4205.73
326	ENSG00000087245	MMP2	819.364	0.876005	0.361919	2.42045	0.0155014	0.147758	574.15	516.798	1064	1354.56	587.314
327	ENSG00000100644	HIF1A	995.958	0.916832	0.378606	2.4216	0.0154525	0.147758	635.981	662.635	1605.88	1447.04	628.255
328	ENSG00000112576	CCND3	275.867	1.11195	0.459333	2.42079	0.0154869	0.147758	129.552	194.684	374.442	513.171	167.485
329	ENSG00000214748	0	179.293	1.0206	0.421217	2.42299	0.0153934	0.147758	100.108	121.058	309.838	197.974	167.485
330	ENSG00000162236	STX5	171.698	1.23273	0.510037	2.41695	0.0156512	0.148285	100.108	89.2008	358.621	212.302	98.2578
331	ENSG00000225482	RPS6P14	273.554	1.08619	0.44931	2.41747	0.0156288	0.148285	154.088	172.03	416.633	464.98	160.041
332	ENSG00000179271	GADD45GIP1	151.302	-1.1225	0.46562	-2.41075	0.0159197	0.150374	140.348	307.247	125.254	79.4503	104.213
333	ENSG00000215369	RPL37P3	97.3093	1.27463	0.529307	2.40812	0.0160351	0.151009	58.8872	46.0163	154.26	158.901	68.4827
334	ENSG00000100345	MYH9	12999.4	0.945511	0.393359	2.40368	0.0162308	0.151487	8675.06	8037.98	19714.9	21687.3	6881.77
335	ENSG00000162441	LZIC	67.3441	-1.45321	0.604382	-2.40446	0.0161963	0.151487	70.6646	147.252	22.4138	44.2838	52.1064
336	ENSG00000198466	ZNF587	87.4401	-1.17046	0.486685	-2.40496	0.0161744	0.151487	157.032	105.484	58.0122	58.6109	58.0615
337	ENSG00000142089	IFITM3	960.106	0.655518	0.27353	2.39651	0.0165519	0.154026	682.11	745.464	1131.24	1053.69	1188.03
338	ENSG00000109536	FRG1	72.3969	-1.38745	0.579354	-2.39482	0.0166285	0.154281	112.867	118.226	36.9169	24.7468	69.2271
339	ENSG00000225443	RPL36AP27	370.98	1.1153	0.466074	2.39297	0.0167126	0.154604	191.383	244.24	653.956	582.201	183.117
340	ENSG00000092203	TOX4	95.9354	-1.35095	0.56488	-2.39157	0.0167764	0.154738	145.255	157.871	58.0122	24.7468	93.7916
341	ENSG00000167792	NDUFV1	158.855	1.16868	0.489002	2.38992	0.0168519	0.154978	107.96	73.6261	164.807	324.313	123.567
342	ENSG00000131467	PSME3	193.622	1.03024	0.431611	2.38697	0.016988	0.155773	118.756	118.934	283.469	304.777	142.176
343	ENSG00000134369	NAV1	712.748	0.704144	0.295514	2.38278	0.0171825	0.157097	554.521	480.693	715.923	946.891	865.711
344	ENSG00000106400	ZNHIT1	82.1316	-1.27386	0.534862	-2.38166	0.0172347	0.157116	112.867	140.173	77.7891	35.1665	44.6627
345	ENSG00000177105	RHOG	197.591	0.936569	0.393794	2.37832	0.0173916	0.158087	126.607	128.138	267.647	289.147	176.417
346	ENSG00000020129	NCDN	379.127	1.01483	0.427073	2.37625	0.0174897	0.15852	226.716	242.824	464.098	721.565	240.434
347	ENSG00000111667	USP5	282.166	1.05099	0.44305	2.37218	0.0176835	0.159814	197.272	145.836	371.806	515.776	180.139
348	ENSG00000140443	IGF1R	464.437	1.12587	0.475869	2.36593	0.0179847	0.162069	367.063	176.278	783.165	756.731	238.945
349	ENSG00000155229	MMS19	373.89	1.03469	0.43788	2.36296	0.0181299	0.162909	276.77	181.941	532.658	652.534	225.546
350	ENSG00000155366	RHOC	171.03	-0.990011	0.419348	-2.36083	0.0182339	0.163376	208.068	279.637	133.164	84.6601	149.62
351	ENSG00000170017	ALCAM	422.067	0.813652	0.345046	2.35809	0.018369	0.164118	210.031	369.546	514.199	496.239	520.32
352	ENSG00000153885	KCTD15	269.651	1.2116	0.514462	2.35508	0.0185185	0.164584	112.867	187.605	400.812	524.893	122.078
353	ENSG00000167193	CRK	150.026	-0.948598	0.402993	-2.35388	0.0185787	0.164584	218.864	203.888	97.566	100.29	129.522
354	ENSG00000185088	RPS27L	1980.4	0.757037	0.32148	2.35485	0.0185301	0.164584	1516.34	1284.21	2329.72	3146.75	1624.98
355	ENSG00000088986	DYNLL1	194.727	-0.959398	0.408084	-2.35098	0.0187239	0.165404	287.566	263.355	102.84	126.339	193.538
356	ENSG00000102225	CDK16	512.646	0.99032	0.422078	2.34629	0.0189611	0.166109	314.065	329.193	667.14	952.101	300.729
357	ENSG00000141753	IGFBP4	474.754	-1.12994	0.48159	-2.34626	0.0189626	0.166109	720.386	690.244	212.272	147.178	603.69
358	ENSG00000143870	PDIA6	384.515	-0.834736	0.355723	-2.34659	0.018946	0.166109	486.801	558.567	294.016	205.789	377.399
359	ENSG00000006831	ADIPOR2	78.3967	-1.31665	0.561624	-2.34435	0.0190602	0.166498	108.941	136.633	27.6876	44.2838	74.4378
360	ENSG00000146540	C7orf50	184.256	-0.920006	0.39295	-2.34128	0.0192177	0.167407	307.195	206.719	126.572	154.993	125.8
361	ENSG00000006634	DBF4	100.664	1.14188	0.488784	2.33617	0.0194826	0.16794	46.1283	70.0864	159.534	131.549	96.0247
362	ENSG00000122741	DCAF10	126.437	-1.0803	0.46255	-2.33553	0.0195157	0.16794	187.457	181.941	126.572	62.5183	73.6934
363	ENSG00000126814	TRMT5	406.077	1.08983	0.466403	2.33667	0.0194563	0.16794	257.141	226.542	667.14	689.003	190.561
364	ENSG00000127483	HP1BP3	200.029	-0.871833	0.373535	-2.33401	0.0195954	0.16794	245.363	304.415	127.891	160.203	162.274
365	ENSG00000204209	DAXX	131.65	-0.9994	0.428208	-2.33391	0.0196002	0.16794	222.79	153.624	101.521	82.0552	98.2578
366	ENSG00000256464	YWHABP2	389.601	0.992548	0.424867	2.33614	0.0194842	0.16794	213.957	273.974	642.09	583.504	234.479
367	ENSG00000196428	TSC22D2	227.686	0.921035	0.394988	2.3318	0.0197111	0.16843	147.218	148.668	307.201	347.758	187.583
368	ENSG00000101782	RIOK3	124.721	-1.00162	0.429744	-2.33075	0.0197667	0.168447	174.699	181.941	102.84	70.333	93.7916
369	ENSG00000102316	MAGED2	1131.02	0.939511	0.404209	2.32432	0.0201083	0.170107	827.365	630.777	1715.32	1848.2	633.465
370	ENSG00000119820	YIPF4	77.4309	-1.21689	0.523387	-2.32502	0.0200708	0.170107	105.015	130.262	64.6045	35.1665	52.1064
371	ENSG00000138735	PDE5A	70.7595	-1.31965	0.567829	-2.32402	0.0201242	0.170107	143.292	77.8737	58.0122	29.9567	44.6627
372	ENSG00000233762	RPS15P4	1992.68	0.746729	0.322234	2.31735	0.0204847	0.172688	1564.44	1267.93	2730.53	2843.28	1557.24
373	ENSG00000095787	WAC	470.807	0.871977	0.377358	2.31074	0.020847	0.174802	324.861	303	627.587	760.639	337.947
374	ENSG00000105723	GSK3A	144.765	1.12141	0.48516	2.31142	0.0208095	0.174802	92.2566	77.1658	222.82	237.048	94.536
375	ENSG00000183011	NAA38	293.791	0.997569	0.432309	2.30754	0.0210249	0.175824	173.717	193.268	357.302	549.64	195.027
376	ENSG00000106366	SERPINE1	696.701	0.716137	0.310805	2.30413	0.0212151	0.176943	427.913	577.681	698.783	806.225	972.902
377	ENSG00000075624	ACTB	1426.73	-0.638276	0.277358	-2.30127	0.0213761	0.177635	1639.03	1994.28	1046.86	1129.24	1324.25
378	ENSG00000183955	KMT5A	131.1	-1.08827	0.473027	-2.30065	0.0214113	0.177635	160.958	224.418	71.1968	66.4257	132.499
379	ENSG00000048740	CELF2	138.256	1.059	0.460614	2.29909	0.0214996	0.177896	92.2566	75.042	214.909	201.882	107.19
380	ENSG00000009413	REV3L	163.179	-0.932266	0.405795	-2.29738	0.0215968	0.17811	205.124	252.028	90.9737	131.549	136.221
381	ENSG00000110619	CARS1	311.921	0.798851	0.347984	2.29565	0.0216958	0.17811	218.864	213.091	309.838	470.189	347.624
382	ENSG00000163431	LMOD1	123.252	-1.17791	0.513057	-2.29588	0.0216829	0.17811	218.864	150.792	81.7445	122.432	42.4295
383	ENSG00000187079	TEAD1	364.643	-0.823241	0.358846	-2.29414	0.0217826	0.178356	536.855	450.96	299.29	191.462	344.647
384	ENSG00000177706	FAM20C	104.785	1.29455	0.565075	2.29093	0.0219674	0.1794	29.4436	82.1214	77.7891	169.32	165.252
385	ENSG00000058091	CDK14	293.441	0.935588	0.409264	2.28603	0.0222527	0.180525	203.161	175.57	379.716	498.844	209.914
386	ENSG00000087111	PIGS	73.0666	1.19504	0.52278	2.28593	0.0222586	0.180525	44.1654	38.2289	116.024	82.0552	84.859
387	ENSG00000110768	GTF2H1	101.086	1.28125	0.560577	2.2856	0.0222778	0.180525	48.0912	60.1752	160.852	179.74	56.5727
388	ENSG00000245532	NEAT1	1089.14	-0.881745	0.386176	-2.28327	0.0224144	0.181164	2056.14	945.104	830.629	1077.14	536.696
389	ENSG00000099942	CRKL	77.1657	1.35105	0.592244	2.28124	0.0225342	0.181664	39.2581	40.3527	102.84	154.993	48.3845
390	ENSG00000123240	OPTN	446.842	-0.723046	0.317267	-2.27898	0.022668	0.182207	518.207	652.723	309.838	352.968	400.475
391	ENSG00000171467	ZNF318	381.684	1.02242	0.448794	2.27815	0.0227177	0.182207	252.233	218.754	570.893	665.559	200.982
392	ENSG00000112378	PERP	86.1607	-1.16648	0.512477	-2.27615	0.0228368	0.182694	135.44	123.182	35.5984	70.333	66.2496
393	ENSG00000095752	IL11	126.758	1.1811	0.519498	2.27354	0.0229938	0.183482	67.7202	75.7499	185.903	229.234	75.1821
394	ENSG00000074416	MGLL	485.215	0.686612	0.30276	2.26784	0.0233388	0.184359	322.898	387.245	609.128	552.245	554.561
395	ENSG00000108828	VAT1	302.41	-0.8078	0.356122	-2.26832	0.0233095	0.184359	426.932	388.661	196.45	199.277	300.729
396	ENSG00000117523	PRRC2C	1443.74	-0.609049	0.268452	-2.26875	0.0232837	0.184359	1847.09	1793.22	1070.59	1181.33	1326.48
397	ENSG00000168899	VAMP5	258.026	0.972306	0.428259	2.27037	0.0231851	0.184359	176.662	150.084	329.615	455.862	177.906
398	ENSG00000127314	RAP1B	258.915	0.994005	0.438798	2.26529	0.0234948	0.185125	151.144	172.738	441.684	365.992	163.019
399	ENSG00000196199	MPHOSPH8	177.334	-0.96279	0.426187	-2.25908	0.0238785	0.187677	247.326	254.152	77.7891	161.506	145.898
400	ENSG00000087263	OGFOD1	151.499	-0.89002	0.394968	-2.2534	0.0242342	0.189735	194.328	224.418	114.706	104.197	119.845
401	ENSG00000164114	MAP9	96.0834	-1.44479	0.642076	-2.25019	0.0244368	0.189735	143.292	167.782	15.8215	45.5862	107.935
402	ENSG00000166441	RPL27A	5415.4	0.681463	0.302823	2.25037	0.0244257	0.189735	3876.74	4072.8	6956.19	7812.18	4359.08
403	ENSG00000167770	OTUB1	281.359	0.965208	0.428916	2.25034	0.0244271	0.189735	169.791	187.605	333.57	522.288	193.538
404	ENSG00000204843	DCTN1	418.14	-0.796461	0.353968	-2.2501	0.0244429	0.189735	399.451	721.394	340.163	343.85	285.841
405	ENSG00000198786	MT-ND5	3533.83	0.5979	0.266023	2.24755	0.0246048	0.19052	3096.48	2307.19	3903.96	4252.54	4108.96
406	ENSG00000166913	YWHAB	4190.61	0.67809	0.302004	2.2453	0.0247486	0.191161	3256.46	2905.4	5343.72	6017.38	3430.09
407	ENSG00000108518	PFN1	87.5259	-3.26476	1.45488	-2.244	0.0248321	0.191336	112.867	266.187	11.8661	1.30246	45.407
408	ENSG00000005249	PRKAR2B	101.312	-1.49664	0.667872	-2.2409	0.0250323	0.191855	133.478	198.224	10.5477	63.8207	100.491
409	ENSG00000065534	MYLK	461.939	-0.815897	0.364482	-2.23851	0.0251878	0.191855	617.334	631.485	263.692	286.542	510.643
410	ENSG00000081087	OSTM1	81.8603	-1.13369	0.506721	-2.2373	0.0252666	0.191855	105.015	138.049	67.2414	41.6788	57.3171
411	ENSG00000137207	YIPF3	183.142	1.05801	0.472721	2.23812	0.0252135	0.191855	119.737	101.944	243.915	334.733	115.379
412	ENSG00000174720	LARP7	150.895	-1.09421	0.488462	-2.24011	0.0250836	0.191855	255.178	188.313	50.1015	148.481	112.401
413	ENSG00000198225	FKBP1C	169.704	1.34645	0.600615	2.24178	0.0249754	0.191855	95.2009	80.7055	228.093	389.437	55.0839
414	ENSG00000157259	GATAD1	197.927	-1.11541	0.499182	-2.23449	0.0254512	0.19279	240.456	344.06	217.546	57.3084	130.266
415	ENSG00000131966	ACTR10	69.3161	1.24557	0.557705	2.23339	0.0255235	0.192872	41.221	34.6892	117.343	93.7774	59.5502
416	ENSG00000034152	MAP2K3	91.8303	-1.07415	0.482362	-2.22686	0.0259565	0.193666	111.886	156.455	52.7384	65.1232	72.949
417	ENSG00000074590	NUAK1	352.052	1.02665	0.460692	2.2285	0.0258471	0.193666	234.567	198.932	420.589	711.145	195.027
418	ENSG00000078246	TULP3	79.109	1.09926	0.493776	2.22622	0.0259992	0.193666	47.1097	46.7242	98.8844	106.802	96.0247
419	ENSG00000131462	TUBG1	119.553	1.07564	0.48287	2.2276	0.0259074	0.193666	63.7944	79.2896	208.317	151.086	95.2803
420	ENSG00000169641	LUZP1	369.609	0.853645	0.383354	2.22678	0.0259619	0.193666	264.011	233.621	390.264	651.232	308.917
421	ENSG00000184384	MAML2	94.3796	-1.05209	0.472536	-2.22649	0.0259816	0.193666	140.348	133.801	72.5153	50.7961	74.4378
422	ENSG00000112079	STK38	326.051	0.855005	0.384621	2.22298	0.0262171	0.194316	211.012	227.25	461.461	487.121	243.411
423	ENSG00000115935	WIPF1	309.034	0.972656	0.437562	2.2229	0.0262228	0.194316	217.883	173.446	507.607	462.375	183.861
424	ENSG00000152102	FAM168B	143.208	1.04226	0.469029	2.22216	0.0262723	0.194316	85.3864	89.2008	243.915	194.067	103.468
425	ENSG00000139318	DUSP6	153.372	0.94059	0.424735	2.21453	0.0267922	0.197331	101.09	96.9882	133.164	201.882	233.735
426	ENSG00000167535	CACNB3	204.779	0.90604	0.40917	2.21433	0.0268058	0.197331	128.57	139.465	294.016	299.567	162.274
427	ENSG00000134590	RTL8C	209.268	-0.928809	0.419851	-2.21224	0.0269503	0.19793	254.196	332.025	148.986	98.9872	212.148
428	ENSG00000244509	APOBEC3C	354.936	-0.820878	0.371263	-2.21104	0.0270329	0.198073	428.895	529.541	255.781	369.9	190.561
429	ENSG00000165527	ARF6	286.512	0.901631	0.408417	2.20762	0.0272706	0.199348	149.181	226.542	410.041	432.418	214.381
430	ENSG00000057019	DCBLD2	444.903	0.744955	0.338918	2.19804	0.0279463	0.201614	297.38	334.857	556.39	647.325	388.565
431	ENSG00000101160	CTSZ	275.972	0.895486	0.407086	2.19975	0.0278249	0.201614	178.624	184.773	333.57	476.702	206.193
432	ENSG00000123064	DDX54	285.101	0.808793	0.367533	2.2006	0.0277645	0.201614	180.587	211.675	443.002	328.221	262.021
433	ENSG00000132780	NASP	180.843	-0.825931	0.375797	-2.19781	0.0279626	0.201614	269.9	220.17	133.164	138.061	142.92
434	ENSG00000135940	COX5B	621.001	0.779202	0.353977	2.20128	0.0277165	0.201614	452.45	415.563	800.305	967.731	468.958
435	ENSG00000143537	ADAM15	153.291	0.913024	0.415434	2.19776	0.0279662	0.201614	95.2009	104.776	236.004	182.345	148.131
436	ENSG00000175749	EIF3KP1	128.109	1.14757	0.522702	2.19545	0.0281312	0.202338	61.8315	85.6611	196.45	221.419	75.1821
437	ENSG00000105887	MTPN	721.124	0.683654	0.311881	2.19203	0.0283771	0.203492	512.318	544.408	955.883	957.311	635.698
438	ENSG00000130522	JUND	429.232	1.003	0.457693	2.19142	0.0284214	0.203492	325.842	209.551	594.625	790.596	225.546
439	ENSG00000100353	EIF3D	245.948	-0.816686	0.373421	-2.18704	0.0287399	0.203787	339.583	325.654	179.31	143.271	241.923
440	ENSG00000110330	BIRC2	123.31	0.998617	0.457116	2.1846	0.028918	0.203787	73.609	80.7055	185.903	102.895	173.44
441	ENSG00000149218	ENDOD1	213.368	0.899924	0.41148	2.18704	0.0287394	0.203787	120.719	159.287	286.106	329.523	171.207
442	ENSG00000167671	UBXN6	83.0056	1.11579	0.510939	2.1838	0.028977	0.203787	49.0726	48.8481	79.1076	100.29	137.71
443	ENSG00000172831	CES2	69.2996	-1.21651	0.557001	-2.18404	0.0289596	0.203787	127.589	82.8293	35.5984	62.5183	37.9633
444	ENSG00000173546	CSPG4	133.669	-0.969207	0.443284	-2.18642	0.0287845	0.203787	193.346	184.773	72.5153	132.851	84.859
445	ENSG00000181458	TMEM45A	102.356	1.18221	0.541375	2.18373	0.0289824	0.203787	62.813	53.0957	146.349	186.252	63.2721
446	ENSG00000189171	S100A13	546.553	-0.680587	0.311106	-2.18764	0.0286962	0.203787	600.649	810.595	491.785	392.042	437.694
447	ENSG00000141258	SGSM2	99.2899	1.17702	0.539701	2.18088	0.0291922	0.204803	58.8872	53.8037	175.355	145.876	62.5277
448	ENSG00000143774	GUK1	97.057	1.06203	0.48746	2.17871	0.0293533	0.205473	49.0726	67.9625	108.114	158.901	101.235
449	ENSG00000138835	RGS3	67.236	1.27798	0.587082	2.17684	0.0294925	0.205987	38.2767	33.9813	113.388	102.895	47.6402
450	ENSG00000242327	0	67.9749	1.35842	0.624311	2.17588	0.0295645	0.206032	40.2396	29.7336	100.203	130.246	39.452
451	ENSG00000197321	SVIL	93.1065	-1.04499	0.480575	-2.17446	0.0296704	0.206311	128.57	141.589	60.6491	52.0986	82.6259
452	ENSG00000142687	KIAA0319L	84.6542	-1.04255	0.479676	-2.17344	0.0297474	0.206389	118.756	126.014	65.923	56.0059	56.5727
453	ENSG00000226110	0	356.567	1.08252	0.498388	2.17205	0.0298518	0.206656	270.881	155.747	609.128	590.016	157.064
454	ENSG00000168724	DNAJC21	239.589	-0.904629	0.416858	-2.17011	0.0299984	0.206758	327.805	338.397	101.521	187.555	242.667
455	ENSG00000225663	MCRIP1	116.527	-0.990497	0.456317	-2.17063	0.0299589	0.206758	170.773	162.119	63.286	75.5429	110.912
456	ENSG00000001617	SEMA3F	109.379	1.29341	0.597945	2.16309	0.0305345	0.20696	62.813	53.8037	237.323	144.573	48.3845
457	ENSG00000026025	VIM	4094.34	0.586338	0.270431	2.16816	0.0301463	0.20696	2799.1	3495.82	4658.12	4109.27	5409.39
458	ENSG00000085063	CD59	434.938	-0.935781	0.432496	-2.16367	0.0304894	0.20696	536.855	683.873	238.641	182.345	532.974
459	ENSG00000107223	EDF1	106.862	-1.09488	0.505395	-2.16639	0.0302813	0.20696	152.125	162.827	43.5092	66.4257	109.424
460	ENSG00000118596	SLC16A7	71.3553	-1.14975	0.531808	-2.16196	0.0306216	0.20696	105.997	106.899	34.2799	61.2158	48.3845
461	ENSG00000162909	CAPN2	444.342	0.701467	0.324314	2.16292	0.0305472	0.20696	290.51	354.679	530.021	614.763	431.739
462	ENSG00000180370	PAK2	196.356	0.846045	0.390254	2.16793	0.0301638	0.20696	147.218	118.934	181.947	255.283	278.397
463	ENSG00000185608	MRPL40	76.2586	1.13783	0.525451	2.16544	0.0303539	0.20696	47.1097	41.7686	68.5599	110.709	113.145
464	ENSG00000243759	ST13P15	158.72	1.05087	0.485967	2.16244	0.0305843	0.20696	94.2195	98.4041	242.597	263.098	95.2803
465	ENSG00000178988	MRFAP1L1	192.335	0.792876	0.366939	2.16079	0.0307119	0.207124	138.385	128.846	246.552	225.326	222.569
466	ENSG00000125772	GPCPD1	68.6642	1.26563	0.586529	2.15783	0.030941	0.208221	29.4436	44.6004	125.254	91.1725	52.8508
467	ENSG00000154767	XPC	79.1432	-1.24153	0.575641	-2.15678	0.0310226	0.208323	98.1453	144.42	61.9676	23.4443	67.7384
468	ENSG00000006534	ALDH3B1	113.405	-1.01769	0.475016	-2.14243	0.0321593	0.208861	132.496	192.56	67.2414	110.709	64.0165
469	ENSG00000100281	HMGXB4	166.4	-0.815591	0.380705	-2.14232	0.0321677	0.208861	213.957	235.037	127.891	131.549	123.567
470	ENSG00000105559	PLEKHA4	83.1732	-1.45162	0.676392	-2.14612	0.0318638	0.208861	175.68	94.1564	42.1907	13.0246	90.8141
471	ENSG00000106344	RBM28	81.84	-1.06409	0.496071	-2.14504	0.0319498	0.208861	111.886	126.722	58.0122	45.5862	66.994
472	ENSG00000112514	CUTA	254.357	-0.78758	0.366073	-2.15143	0.0314422	0.208861	323.879	356.095	253.144	161.506	177.162
473	ENSG00000115234	SNX17	309.483	0.886223	0.413336	2.14407	0.0320271	0.208861	188.439	220.878	436.41	496.239	205.448
474	ENSG00000123159	GIPC1	114.127	1.02343	0.476442	2.14808	0.0317077	0.208861	84.4049	56.6354	118.661	194.067	116.867
475	ENSG00000125378	BMP4	583.872	1.06743	0.498087	2.14306	0.0321083	0.208861	441.654	262.647	697.465	1265.99	251.6
476	ENSG00000131378	RFTN1	153.6	0.86303	0.401777	2.14803	0.0317112	0.208861	104.034	101.944	159.534	220.116	182.373
477	ENSG00000136938	ANP32B	1016.6	-0.75963	0.352721	-2.15363	0.031269	0.208861	1394.64	1302.62	628.905	571.782	1185.05
478	ENSG00000164366	CCDC127	154.099	1.10477	0.515326	2.14384	0.032046	0.208861	91.2751	90.6167	158.215	332.128	98.2578
479	ENSG00000172053	QARS1	99.8029	-0.972722	0.452886	-2.14783	0.0317271	0.208861	132.496	150.084	79.1076	70.333	66.994
480	ENSG00000179222	MAGED1	561.554	0.945649	0.441415	2.14231	0.0321683	0.208861	365.1	356.095	872.82	939.076	274.675
481	ENSG00000183978	COA3	218.464	1.04249	0.483923	2.15426	0.0312202	0.208861	167.828	99.112	288.743	406.369	130.266
482	ENSG00000187957	DNER	97.4752	1.15403	0.536766	2.14998	0.0315571	0.208861	61.8315	50.264	181.947	126.339	66.994
483	ENSG00000205940	HSP90AB2P	182.521	1.27354	0.593552	2.14562	0.0319029	0.208861	133.478	63.7149	274.24	376.412	64.7609
484	ENSG00000108107	RPL28	1147.67	0.640424	0.299175	2.14063	0.0323037	0.209256	838.161	879.973	1619.07	1375.4	1025.75
485	ENSG00000143321	HDGF	266.664	-0.845642	0.39533	-2.13908	0.0324293	0.209256	332.713	395.032	205.68	128.944	270.953
486	ENSG00000160753	RUSC1	175.304	1.01992	0.47671	2.13949	0.0323962	0.209256	118.756	97.6961	282.15	272.215	105.702
487	ENSG00000081154	PCNP	83.03	-1.06626	0.499372	-2.13521	0.0327441	0.210094	138.385	104.068	47.4645	56.0059	69.2271
488	ENSG00000164733	CTSB	2820.34	-0.618053	0.289324	-2.1362	0.0326632	0.210094	3497.9	3635.29	2213.69	1823.45	2931.36
489	ENSG00000172336	POP7	65.4735	1.15177	0.539674	2.13419	0.0328272	0.210094	37.2952	38.2289	98.8844	70.333	82.6259
490	ENSG00000182809	CRIP2	73.3751	1.11586	0.522805	2.13438	0.0328116	0.210094	48.0912	38.2289	88.3368	113.314	78.904
491	ENSG00000135899	SP110	69.5944	-1.14769	0.538771	-2.13021	0.0331544	0.210897	116.793	90.6167	36.9169	61.2158	42.4295
492	ENSG00000143545	RAB13	263.964	-0.781797	0.36691	-2.13076	0.0331092	0.210897	412.21	293.796	179.31	183.647	250.855
493	ENSG00000184787	UBE2G2	163.563	-0.904503	0.424502	-2.13074	0.0331108	0.210897	207.087	247.78	84.3814	118.524	160.041
494	ENSG00000101882	NKAP	84.7725	-1.09209	0.513049	-2.12863	0.033285	0.211299	160.958	87.7849	63.286	61.2158	50.6177
495	ENSG00000058668	ATP2B4	401.308	-0.705111	0.331999	-2.12383	0.033684	0.21313	435.765	609.539	319.067	277.425	364.745
496	ENSG00000067334	DNTTIP2	202.794	0.859976	0.405027	2.12325	0.0337327	0.21313	137.403	134.509	245.233	325.616	171.207
497	ENSG00000148296	SURF6	77.6416	-1.16946	0.55099	-2.12247	0.033798	0.21313	114.83	118.226	27.6876	71.6355	55.8283
498	ENSG00000170955	CAVIN3	391.639	0.757181	0.3569	2.12155	0.0338757	0.21313	283.64	269.726	443.002	623.88	337.947
499	ENSG00000180879	SSR4	168.193	0.832702	0.39258	2.1211	0.0339132	0.21313	131.515	97.6961	209.635	217.511	184.606
500	ENSG00000228300	FAM174C	71.1508	1.11838	0.528032	2.11802	0.0341731	0.214334	35.3323	48.1401	96.2475	75.5429	100.491
501	ENSG00000114270	COL7A1	127.396	1.20658	0.570703	2.1142	0.0344986	0.215513	68.7017	73.6261	129.209	296.962	68.4827
502	ENSG00000164022	AIMP1	81.2495	-1.26882	0.599949	-2.11488	0.0344401	0.215513	109.923	141.589	23.7323	41.6788	89.3253
503	ENSG00000168028	RPSA	95.0453	-1.10361	0.522576	-2.11187	0.0346977	0.216326	112.867	167.782	40.8722	59.9133	93.7916
504	ENSG00000265808	SEC22B	162.783	0.886753	0.420227	2.11018	0.0348432	0.216802	93.238	121.766	225.457	230.536	142.92
505	ENSG00000122545	SEPTIN7	413.544	-0.811019	0.384632	-2.10856	0.0349828	0.217239	517.226	598.92	196.45	299.567	455.559
506	ENSG00000068323	TFE3	237.003	0.96475	0.458737	2.10306	0.0354607	0.21776	145.255	155.747	398.175	350.363	135.477
507	ENSG00000116670	MAD2L2	135.034	0.980674	0.466305	2.10307	0.0354594	0.21776	95.2009	75.042	177.992	222.721	104.213
508	ENSG00000130227	XPO7	458.94	0.904301	0.429442	2.10576	0.0352254	0.21776	323.879	278.222	560.345	863.533	268.72
509	ENSG00000166130	IKBIP	121.61	0.901982	0.428256	2.10617	0.0351892	0.21776	86.3678	73.6261	167.444	135.456	145.154
510	ENSG00000188375	H3-5	174.856	1.01349	0.48197	2.1028	0.0354831	0.21776	79.4977	136.633	246.552	296.962	114.634
511	ENSG00000235379	RPL7P31	597.608	0.907686	0.431177	2.10514	0.0352794	0.21776	413.192	369.546	827.992	1065.42	311.894
512	ENSG00000116918	TSNAX	68.7363	-1.26069	0.600774	-2.09845	0.0358656	0.219677	88.3308	123.182	19.7769	62.5183	49.8733
513	ENSG00000121579	NAA50	182.531	0.957112	0.456662	2.09589	0.0360922	0.220634	92.2566	140.173	317.749	229.234	133.244
514	ENSG00000085377	PREP	83.2467	1.21278	0.579241	2.09374	0.0362829	0.220938	34.3508	58.0513	97.566	166.715	59.5502
515	ENSG00000090266	NDUFB2	122.278	0.922912	0.440751	2.09395	0.0362642	0.220938	84.4049	75.042	150.304	118.524	183.117
516	ENSG00000114439	BBX	980.887	0.902535	0.431574	2.09127	0.0365043	0.220999	614.389	673.962	1380.43	1762.23	473.424
517	ENSG00000164587	RPS14	3678.62	0.683555	0.326771	2.09185	0.0364523	0.220999	2668.57	2725.58	4979.82	5371.36	2647.75
518	ENSG00000178585	CTNNBIP1	68.8895	1.28568	0.614329	2.09281	0.0363658	0.220999	24.5363	48.8481	134.483	85.9626	50.6177
519	ENSG00000113657	DPYSL3	851.774	0.871168	0.416782	2.09022	0.0365977	0.221138	671.314	465.826	1198.48	1453.55	469.702
520	ENSG00000108100	CCNY	185.961	1.14629	0.549433	2.08632	0.0369496	0.222407	102.071	112.563	284.787	358.178	72.2046
521	ENSG00000168439	STIP1	203.192	0.80506	0.385804	2.08671	0.0369148	0.222407	133.478	146.544	292.698	257.888	185.35
522	ENSG00000167778	SPRYD3	100.693	1.11311	0.533865	2.085	0.0370691	0.222699	34.3508	83.5373	171.4	115.919	98.2578
523	ENSG00000132254	ARFIP2	174.495	1.06395	0.511071	2.08181	0.0373601	0.223916	109.923	100.528	259.736	315.196	87.0922
524	ENSG00000140545	MFGE8	163.922	0.80273	0.385703	2.08121	0.0374145	0.223916	119.737	106.899	210.953	196.672	185.35
525	ENSG00000065000	AP3D1	844.158	-0.62822	0.303274	-2.07146	0.0383159	0.228439	1232.7	908.999	665.822	814.04	599.224
526	ENSG00000141027	NCOR1	203.939	-0.805209	0.388597	-2.07209	0.038257	0.228439	316.028	233.621	123.935	156.296	189.816
527	ENSG00000148660	CAMK2G	133.163	1.18351	0.572239	2.0682	0.038621	0.229821	97.1638	53.8037	183.266	268.308	63.2721
528	ENSG00000071575	TRIB2	183.123	1.04353	0.505322	2.06507	0.0389161	0.230771	117.774	105.484	305.883	295.659	90.8141
529	ENSG00000102390	PBDC1	80.6355	-1.12736	0.54595	-2.06495	0.0389279	0.230771	98.1453	141.589	51.4199	33.8641	78.1596
530	ENSG00000228453	RPS15AP9	187.76	1.09916	0.532628	2.06366	0.0390501	0.231059	127.589	94.8644	274.24	359.48	82.6259
531	ENSG00000212802	RPL15P3	137.87	1.03332	0.501469	2.06059	0.0393418	0.232346	106.978	62.299	214.909	213.604	91.5584
532	ENSG00000137944	KYAT3	71.5126	1.0632	0.516793	2.05731	0.0396562	0.233324	46.1283	40.3527	89.6552	100.29	81.1372
533	ENSG00000150347	ARID5B	489.55	-0.677162	0.329127	-2.05745	0.0396432	0.233324	570.224	693.784	345.436	337.338	500.966
534	ENSG00000164105	SAP30	172.752	0.981274	0.477377	2.05555	0.0398255	0.233882	91.2751	126.014	326.978	201.882	117.612
535	ENSG00000145675	PIK3R1	145.843	0.951236	0.464521	2.04778	0.0405815	0.237876	65.7573	120.35	226.775	192.765	123.567
536	ENSG00000184990	SIVA1	71.1048	1.14498	0.560218	2.04381	0.0409725	0.23972	30.425	51.6798	113.388	62.5183	97.5135
537	ENSG00000140943	MBTPS1	237.84	0.962107	0.471653	2.03986	0.0413639	0.241442	174.699	128.138	300.609	448.048	137.71
538	ENSG00000159167	STC1	794.994	0.729944	0.35794	2.03929	0.0414209	0.241442	502.504	637.857	771.299	682.491	1380.82
539	ENSG00000163605	PPP4R2	181.281	-0.758937	0.372362	-2.03817	0.0415331	0.241647	230.641	249.904	147.667	131.549	146.642
540	ENSG00000198918	RPL39	73.1891	-1.0435	0.512182	-2.03737	0.0416131	0.241664	105.015	106.899	58.0122	41.6788	54.3396
541	ENSG00000071462	BUD23	138.924	-0.995563	0.490332	-2.03038	0.0423175	0.243054	232.604	164.243	50.1015	136.759	110.912
542	ENSG00000106028	SSBP1	182.723	0.768079	0.378168	2.03105	0.0422496	0.243054	143.292	113.979	234.686	205.789	215.87
543	ENSG00000152104	PTPN14	318.429	-0.67078	0.330245	-2.03116	0.0422387	0.243054	373.934	446.004	229.412	264.4	278.397
544	ENSG00000163430	FSTL1	321.577	-0.901838	0.443745	-2.03233	0.04212	0.243054	517.226	376.626	141.075	178.438	394.52
545	ENSG00000197744	PTMAP2	196.345	0.894695	0.440629	2.0305	0.0423061	0.243054	176.662	82.8293	221.501	308.684	192.049
546	ENSG00000213791	0	1940.86	0.774541	0.381074	2.03252	0.0421008	0.243054	1176.76	1543.32	2948.08	2892.77	1143.36
547	ENSG00000040275	SPDL1	176.259	0.818434	0.404415	2.02375	0.0429961	0.244711	95.2009	145.836	228.093	235.746	176.417
548	ENSG00000092853	CLSPN	155.138	-0.794636	0.392508	-2.02451	0.0429177	0.244711	206.105	210.259	108.114	117.222	133.988
549	ENSG00000115762	PLEKHB2	183.116	0.799633	0.394979	2.02449	0.0429194	0.244711	124.645	128.846	171.4	274.82	215.87
550	ENSG00000120675	DNAJC15	77.824	-1.09413	0.540463	-2.02443	0.042926	0.244711	124.645	104.776	34.2799	49.4936	75.9265
551	ENSG00000136045	PWP1	420.477	0.668396	0.330075	2.02498	0.0428693	0.244711	309.158	311.495	585.396	514.473	381.866
552	ENSG00000148925	BTBD10	114.6	0.986511	0.488382	2.01996	0.0433877	0.246492	66.7388	77.1658	108.114	212.302	108.679
553	ENSG00000056586	RC3H2	100.751	0.913746	0.452563	2.01905	0.0434823	0.246583	71.6461	60.1752	119.98	127.641	124.311
554	ENSG00000120694	HSPH1	485.12	0.643356	0.318901	2.01742	0.0436521	0.246654	324.861	399.988	539.25	674.676	486.823
555	ENSG00000166341	DCHS1	119.705	1.34384	0.666033	2.01768	0.0436246	0.246654	91.2751	33.2733	158.215	274.82	40.9408
556	ENSG00000088247	KHSRP	507.636	-0.72536	0.359815	-2.01593	0.0438078	0.247089	654.629	677.501	404.767	257.888	543.396
557	ENSG00000168487	BMP1	275.782	1.04775	0.520241	2.01397	0.0440123	0.247796	175.68	159.995	516.836	420.696	105.702
558	ENSG00000110880	CORO1C	304.392	0.658845	0.327698	2.01053	0.0443754	0.248947	231.623	220.17	387.627	343.85	338.692
559	ENSG00000214253	FIS1	97.0768	1.02077	0.507538	2.01121	0.044303	0.248947	64.7759	55.2196	87.0183	177.135	101.235
560	ENSG00000236238	0	96.5459	1.4861	0.741106	2.00524	0.0449371	0.251648	71.6461	21.2383	171.4	195.37	23.0757
561	ENSG00000007168	PAFAH1B1	348.308	0.747656	0.374813	1.99475	0.0460707	0.253481	241.437	252.736	454.868	527.498	264.998
562	ENSG00000067955	CBFB	132.473	0.848155	0.425668	1.99252	0.0463136	0.253481	79.4977	99.112	150.304	192.765	140.687
563	ENSG00000074695	LMAN1	584.075	-0.71599	0.358701	-1.99607	0.0459267	0.253481	679.165	848.824	363.895	360.782	667.707
564	ENSG00000078618	NRDC	441.153	0.683367	0.341698	1.99992	0.0455092	0.253481	258.122	387.953	507.607	622.578	429.506
565	ENSG00000092841	MYL6	5112.53	0.766233	0.383921	1.99581	0.0459546	0.253481	3700.08	3497.24	6886.31	8644.45	2834.59
566	ENSG00000099194	SCD	100.531	0.969252	0.48486	1.99904	0.0456043	0.253481	77.5348	50.264	116.024	157.598	101.235
567	ENSG00000110031	LPXN	84.2972	0.977505	0.488904	1.99938	0.0455671	0.253481	47.1097	59.4672	97.566	98.9872	118.356
568	ENSG00000125651	GTF2F1	249.808	-0.845658	0.424576	-1.99177	0.0463961	0.253481	431.839	248.488	159.534	272.215	136.965
569	ENSG00000138675	FGF5	67.4537	1.13416	0.568726	1.99421	0.0461288	0.253481	41.221	37.521	51.4199	108.104	99.0022
570	ENSG00000156531	PHF6	135.506	0.978945	0.490456	1.99599	0.0459349	0.253481	81.4606	89.2008	200.406	220.116	86.3478
571	ENSG00000164062	APEH	100.803	1.04997	0.526975	1.99246	0.0463209	0.253481	71.6461	50.9719	118.661	187.555	75.1821
572	ENSG00000171865	RNASEH1	170.345	-0.80224	0.402447	-1.99341	0.0462167	0.253481	190.402	266.894	118.661	158.901	116.867
573	ENSG00000174684	B4GAT1	86.2093	1.15496	0.577162	2.00111	0.0453809	0.253481	39.2581	59.4672	122.617	157.598	52.1064
574	ENSG00000211584	SLC48A1	93.1033	1.10716	0.554692	1.99599	0.0459345	0.253481	69.6832	40.3527	98.8844	183.647	72.949
575	ENSG00000165916	PSMC3	405.946	0.686461	0.345067	1.98935	0.0466622	0.254492	232.604	361.759	411.359	459.77	564.238
576	ENSG00000157613	CREB3L1	416.263	-0.629292	0.31648	-1.98841	0.0467663	0.254616	496.615	559.275	334.889	392.042	298.495
577	ENSG00000092820	EZR	194.973	-0.751083	0.378161	-1.98614	0.0470172	0.255223	263.029	252.736	172.718	121.129	165.252
578	ENSG00000141376	BCAS3	128.721	1.06109	0.534302	1.98594	0.0470405	0.255223	85.3864	70.0864	189.858	230.536	67.7384
579	ENSG00000065548	ZC3H15	1249.95	0.710709	0.358387	1.98308	0.0473587	0.255642	978.508	829.709	1611.16	1986.26	844.124
580	ENSG00000091527	CDV3	597.668	0.625413	0.31524	1.98392	0.0472642	0.255642	543.725	358.927	640.771	696.818	748.099
581	ENSG00000100234	TIMP3	539.518	0.670884	0.338434	1.98232	0.0474437	0.255642	429.876	367.422	526.065	524.893	849.335
582	ENSG00000172500	FIBP	305.274	0.749145	0.377823	1.98279	0.0473909	0.255642	227.697	205.303	353.347	488.424	251.6
583	ENSG00000006042	TMEM98	219.187	0.84644	0.427356	1.98064	0.0476313	0.256212	162.921	133.093	367.85	273.517	158.552
584	ENSG00000244754	N4BP2L2	127.175	-1.07043	0.541082	-1.97831	0.0478942	0.257185	200.216	170.614	36.9169	148.481	79.6484
585	ENSG00000132635	PCED1A	259.405	0.874974	0.442785	1.97607	0.0481471	0.257661	203.161	142.297	337.526	448.048	165.996
586	ENSG00000169446	MMGT1	80.9075	1.11995	0.566583	1.97668	0.048078	0.257661	44.1654	50.9719	118.661	50.7961	139.943
587	ENSG00000134001	EIF2S1	80.5662	-1.03844	0.526088	-1.97389	0.0483937	0.258203	137.403	96.2802	46.1461	45.5862	77.4153
588	ENSG00000268623	0	126.032	1.2593	0.638032	1.97373	0.048413	0.258203	96.1824	41.0607	185.903	263.098	43.9183
589	ENSG00000228224	NACA4P	2229.6	1.47249	0.746931	1.97139	0.048679	0.259181	1229.76	929.529	3471.5	4471.36	1045.85
590	ENSG00000120742	SERP1	433.412	0.67801	0.344331	1.96906	0.0489459	0.25972	328.787	307.955	602.536	570.479	357.301
591	ENSG00000156603	MED19	137.566	-0.908089	0.461137	-1.96924	0.0489257	0.25972	205.124	178.402	81.7445	72.938	149.62
592	ENSG00000069011	PITX1	365.238	0.641738	0.326301	1.96671	0.0492169	0.260011	286.584	259.815	473.327	450.652	355.812
593	ENSG00000104853	CLPTM1	206.869	0.872488	0.443545	1.96708	0.0491743	0.260011	158.995	116.811	254.463	358.178	145.898
594	ENSG00000138594	TMOD3	119.293	-0.861826	0.43827	-1.96643	0.0492495	0.260011	174.699	152.208	71.1968	106.802	91.5584
595	ENSG00000005075	POLR2J	70.3276	1.11304	0.567219	1.96228	0.0497294	0.260054	38.2767	44.6004	51.4199	114.617	102.724
596	ENSG00000072415	PALS1	101.115	-0.9734	0.495257	-1.96544	0.049363	0.260054	129.552	157.163	94.9291	44.2838	79.6484
597	ENSG00000116786	PLEKHM2	192.779	-0.77477	0.395004	-1.96142	0.0498297	0.260054	236.53	276.098	187.221	152.388	111.657
598	ENSG00000127540	UQCR11	213.045	-0.888838	0.453097	-1.96169	0.049798	0.260054	271.862	317.866	81.7445	156.296	237.456
599	ENSG00000128708	HAT1	88.9308	1.09178	0.5561	1.96328	0.0496135	0.260054	53.9799	51.6798	89.6552	182.345	66.994
600	ENSG00000140990	NDUFB10	77.4383	-1.0954	0.558494	-1.96135	0.0498382	0.260054	80.4791	147.252	60.6491	32.5616	66.2496
601	ENSG00000154001	PPP2R5E	719.481	0.658646	0.335498	1.96319	0.0496242	0.260054	641.87	426.182	1002.03	906.515	620.811
602	ENSG00000090863	GLG1	275.648	-0.682204	0.348619	-1.95687	0.0503623	0.261141	319.954	392.908	196.45	208.394	260.532
603	ENSG00000166135	HIF1AN	203.119	0.897099	0.458305	1.95743	0.0502971	0.261141	146.236	121.058	377.079	235.746	135.477
604	ENSG00000196549	MME	211.338	-0.872419	0.445848	-1.95676	0.0503755	0.261141	266.955	315.035	154.26	85.9626	234.479
605	ENSG00000197603	CPLANE1	80.4713	-0.951179	0.486107	-1.95673	0.0503796	0.261141	116.793	109.731	60.6491	58.6109	56.5727
606	ENSG00000167522	ANKRD11	571.395	-0.718103	0.367425	-1.95442	0.0506518	0.262119	837.179	659.095	313.793	388.134	658.774
607	ENSG00000129250	KIF1C	610.634	-0.595617	0.305153	-1.95186	0.0509546	0.262387	742.96	788.648	615.721	448.048	457.792
608	ENSG00000140836	ZFHX3	244.664	0.740145	0.379158	1.95208	0.0509293	0.262387	211.012	138.049	313.793	328.221	232.246
609	ENSG00000230734	RPL10P3	192.608	0.733833	0.375821	1.95261	0.0508655	0.262387	139.366	135.925	262.373	231.839	193.538
610	ENSG00000101966	XIAP	168.504	-0.758108	0.389555	-1.94609	0.0516439	0.264169	196.291	249.904	121.298	148.481	126.544
611	ENSG00000117280	RAB29	128.798	-0.926818	0.475986	-1.94715	0.0515163	0.264169	230.641	128.846	122.617	96.3823	65.5052
612	ENSG00000134265	NAPG	85.3943	-0.96672	0.497094	-1.94474	0.0518061	0.264169	108.941	133.093	59.3307	48.1912	77.4153
613	ENSG00000136875	PRPF4	215.993	-0.713533	0.3668	-1.94529	0.0517399	0.264169	278.733	284.593	176.674	199.277	140.687
614	ENSG00000139329	LUM	1091.64	0.830482	0.426748	1.94607	0.0516463	0.264169	734.127	753.251	1681.04	1773.96	515.854
615	ENSG00000242706	RPS27AP9	178.223	1.02721	0.527262	1.9482	0.0513907	0.264169	123.663	95.5723	290.061	302.172	79.6484
616	ENSG00000052802	MSMO1	280.423	0.988957	0.508808	1.94368	0.0519346	0.264394	207.087	145.128	299.29	612.158	138.454
617	ENSG00000149948	HMGA2	213.348	0.888636	0.457461	1.94254	0.0520718	0.264663	134.459	148.668	185.903	171.925	425.784
618	ENSG00000111142	METAP2	1861.97	-0.518241	0.267193	-1.93958	0.0524313	0.265629	2520.37	2026.84	1629.62	1655.43	1477.59
619	ENSG00000158321	AUTS2	116.111	1.24015	0.639342	1.93972	0.0524136	0.265629	57.9057	69.3784	184.584	234.443	34.2414
620	ENSG00000119899	SLC17A5	116.966	-0.913043	0.471234	-1.93756	0.0526771	0.266444	168.81	156.455	60.6491	123.734	75.1821
621	ENSG00000173457	PPP1R14B	145.345	0.854289	0.441477	1.93507	0.0529818	0.267554	96.1824	99.112	230.73	182.345	118.356
622	ENSG00000183963	SMTN	99.5579	0.906536	0.468747	1.93395	0.0531189	0.267815	66.7388	63.7149	109.432	153.691	104.213
623	ENSG00000078401	EDN1	95.0806	1.15756	0.598994	1.9325	0.053298	0.268286	42.2025	66.5466	176.674	144.573	45.407
624	ENSG00000241553	ARPC4	920.506	0.637856	0.330255	1.9314	0.0534332	0.268536	677.202	702.279	1280.22	1238.64	704.181
625	ENSG00000113732	ATP6V0E1	228.112	-0.929419	0.48192	-1.92857	0.0537839	0.268959	303.269	336.273	145.031	76.8454	279.142
626	ENSG00000149294	NCAM1	185.283	1.04214	0.540388	1.9285	0.0537934	0.268959	82.442	144.42	97.566	194.067	407.919
627	ENSG00000152133	GPATCH11	72.2182	-1.01862	0.52872	-1.92658	0.0540319	0.268959	103.053	104.068	68.5599	42.9813	42.4295
628	ENSG00000163029	SMC6	268.437	0.658023	0.34132	1.92788	0.0538706	0.268959	197.272	201.056	313.793	351.665	278.397
629	ENSG00000185551	NR2F2	624.05	-0.671285	0.347868	-1.92971	0.0536427	0.268959	975.564	632.901	466.735	385.529	659.519
630	ENSG00000196498	NCOR2	696.616	0.756565	0.392664	1.92675	0.0540107	0.268959	448.524	535.913	1049.49	1031.55	417.596
631	ENSG00000071054	MAP4K4	2541.89	0.563804	0.292796	1.92559	0.0541561	0.269003	2180.79	1769.15	3246.05	3316.07	2197.4
632	ENSG00000198682	PAPSS2	385.259	-0.611658	0.317722	-1.92514	0.0542122	0.269003	434.784	536.621	333.57	329.523	291.796
633	ENSG00000089220	PEBP1	372.586	-0.705956	0.36707	-1.92322	0.0544529	0.269344	495.634	476.446	237.323	234.443	419.085
634	ENSG00000138663	COPS4	209.824	0.905284	0.470666	1.92341	0.0544283	0.269344	129.552	145.128	292.698	363.387	118.356
635	ENSG00000112977	DAP	171.4	-0.771949	0.402122	-1.91969	0.0548973	0.270689	268.918	187.605	110.751	154.993	134.732
636	ENSG00000151012	SLC7A11	337.089	-0.633608	0.329983	-1.92013	0.054842	0.270689	398.47	458.747	291.38	233.141	303.706
637	ENSG00000198959	TGM2	104.265	0.867757	0.452629	1.91715	0.0552191	0.271848	63.7944	75.7499	118.661	117.222	145.898
638	ENSG00000094916	CBX5	590.562	0.704479	0.368596	1.91125	0.0559727	0.27214	452.45	404.235	646.045	1004.2	445.882
639	ENSG00000101266	CSNK2A1	172.902	-0.755716	0.395065	-1.91289	0.0557617	0.27214	258.122	200.348	139.757	110.709	155.575
640	ENSG00000126457	PRMT1	799.142	0.67268	0.351322	1.91471	0.0555298	0.27214	623.223	554.319	1082.46	1167.01	568.704
641	ENSG00000127947	PTPN12	98.6467	0.971007	0.507991	1.91147	0.0559448	0.27214	44.1654	80.7055	147.667	85.9626	134.732
642	ENSG00000136868	SLC31A1	85.7281	-1.12999	0.590746	-1.91281	0.055772	0.27214	92.2566	162.827	56.6938	26.0493	90.8141
643	ENSG00000156261	CCT8	165.427	0.760479	0.397622	1.91257	0.0558036	0.27214	121.7	111.855	168.763	240.956	183.861
644	ENSG00000173692	PSMD1	722.168	-0.578252	0.301901	-1.91537	0.0554449	0.27214	967.712	833.249	730.426	524.893	554.561
645	ENSG00000181019	NQO1	284.621	-0.700458	0.365885	-1.91442	0.0555663	0.27214	294.436	446.004	195.132	213.604	273.931
646	ENSG00000113658	SMAD5	177.035	-0.716256	0.374962	-1.91021	0.0561065	0.272368	219.845	242.824	131.846	148.481	142.176
647	ENSG00000230611	HMGB1P27	140.025	1.08409	0.568629	1.9065	0.0565847	0.274265	86.3678	80.7055	150.304	316.499	66.2496
648	ENSG00000166923	GREM1	457.37	-0.611673	0.321395	-1.90318	0.0570165	0.2758	631.074	523.878	305.883	392.042	433.972
649	ENSG00000183684	ALYREF	590.446	0.75262	0.395675	1.90212	0.057156	0.2758	463.246	373.086	850.406	905.212	360.279
650	ENSG00000232128	MTCO3P45	2067.16	1.62161	0.852561	1.90205	0.0571652	0.2758	1086.47	753.959	3301.42	4389.3	804.672
651	ENSG00000092439	TRPM7	79.7989	-0.970708	0.511197	-1.89889	0.0575788	0.277369	132.496	94.1564	48.783	52.0986	71.4602
652	ENSG00000049618	ARID1B	324.773	0.77343	0.40799	1.89571	0.0579983	0.278462	224.753	230.081	470.69	488.424	209.914
653	ENSG00000065427	KARS1	162.506	-0.754186	0.397796	-1.89591	0.0579719	0.278462	182.55	247.072	119.98	144.573	118.356
654	ENSG00000226532	0	1206.82	0.673569	0.355417	1.89515	0.0580722	0.278462	835.216	942.272	1766.74	1686.69	803.183
655	ENSG00000179632	MAF1	302.38	0.898121	0.474347	1.89338	0.058307	0.278736	189.42	208.135	473.327	498.844	142.176
656	ENSG00000181191	PJA1	98.5416	1.16055	0.612891	1.89356	0.0582832	0.278736	53.9799	58.7593	123.935	213.604	42.4295
657	ENSG00000011105	TSPAN9	115.303	0.88713	0.469053	1.89132	0.0585813	0.278901	60.8501	91.3246	130.527	183.647	110.168
658	ENSG00000075568	TMEM131	99.4147	-0.883886	0.467176	-1.89197	0.0584944	0.278901	140.348	134.509	64.6045	63.8207	93.7916
659	ENSG00000117139	KDM5B	119.926	-0.970258	0.51306	-1.89112	0.0586083	0.278901	194.328	145.836	113.388	40.3764	105.702
660	ENSG00000185201	IFITM2	646.819	0.656986	0.347529	1.89045	0.0586979	0.278904	443.617	518.214	586.714	617.368	1068.18
661	ENSG00000117632	STMN1	1119.76	0.646598	0.342292	1.88903	0.0588882	0.279385	778.292	892.716	1655.98	1467.88	803.928
662	ENSG00000065308	TRAM2	199.658	0.694284	0.368917	1.88195	0.0598423	0.283163	142.311	148.668	233.367	267.005	206.937
663	ENSG00000133657	ATP13A3	247.405	-0.727128	0.386403	-1.88179	0.0598651	0.283163	357.249	293.088	151.623	169.32	265.743
664	ENSG00000141985	SH3GL1	177.452	0.795609	0.42317	1.88012	0.0600922	0.283809	155.07	92.0326	172.718	197.974	269.465
665	ENSG00000100626	GALNT16	186.523	0.988789	0.52653	1.87793	0.0603903	0.284486	128.57	105.484	357.302	257.888	83.3703
666	ENSG00000106462	EZH2	138.974	0.8089	0.430784	1.87774	0.060417	0.284486	105.015	86.369	212.272	160.203	131.01
667	ENSG00000140526	ABHD2	156.671	-0.729115	0.389093	-1.87388	0.0609467	0.284842	208.068	203.18	134.483	113.314	124.311
668	ENSG00000160213	CSTB	94.2294	-1.01983	0.544212	-1.87395	0.0609369	0.284842	152.125	119.642	68.5599	32.5616	98.2578
669	ENSG00000168214	RBPJ	670.677	0.556724	0.296692	1.87644	0.060595	0.284842	553.539	492.02	777.891	872.651	657.285
670	ENSG00000175216	CKAP5	181.691	-0.79212	0.422633	-1.87425	0.0608961	0.284842	261.066	226.542	87.0183	158.901	174.929
671	ENSG00000184897	H1-10	112.095	-0.850276	0.45345	-1.87513	0.0607754	0.284842	155.07	151.5	84.3814	63.8207	105.702
672	ENSG00000105894	PTN	451.962	0.69242	0.370144	1.87068	0.06139	0.286487	330.75	328.486	535.294	728.077	337.203
673	ENSG00000115738	ID2	66.1635	-1.2508	0.669355	-1.86866	0.0616695	0.287363	107.96	94.8644	13.1846	76.8454	37.9633
674	ENSG00000115648	MLPH	114.324	-0.899559	0.481595	-1.86788	0.0617794	0.287448	139.366	178.402	64.6045	66.4257	122.822
675	ENSG00000144224	UBXN4	242.125	-0.683563	0.366148	-1.8669	0.0619151	0.287653	314.065	312.911	162.17	175.833	245.645
676	ENSG00000119414	PPP6C	99.1788	0.914291	0.490922	1.86239	0.0625476	0.290162	64.7759	64.4228	148.986	138.061	79.6484
677	ENSG00000156515	HK1	334.193	0.616947	0.331515	1.86099	0.0627453	0.29022	265.974	240.701	323.023	420.696	420.573
678	ENSG00000237450	RPL23AP71	65.1921	1.27289	0.683893	1.86125	0.0627091	0.29022	30.425	39.6448	80.426	147.178	28.2863
679	ENSG00000005238	FAM214B	116.104	1.00186	0.53857	1.86023	0.0628528	0.290289	57.9057	86.369	176.674	194.067	65.5052
680	ENSG00000013364	MVP	141.447	0.810849	0.436901	1.85591	0.0634664	0.291834	71.6461	122.474	162.17	200.579	150.364
681	ENSG00000067596	DHX8	64.9723	1.19052	0.641127	1.85692	0.0633229	0.291834	36.3138	36.813	75.1522	139.364	37.2189
682	ENSG00000096401	CDC5L	125.166	-0.79779	0.4298	-1.85619	0.0634268	0.291834	157.032	178.402	117.343	91.1725	81.8815
683	ENSG00000153904	DDAH1	358.932	0.672437	0.362625	1.85436	0.0636872	0.291882	281.677	248.488	406.085	300.869	557.539
684	ENSG00000181649	PHLDA2	294.354	0.910459	0.491027	1.85419	0.0637118	0.291882	131.515	254.152	255.781	200.579	629.743
685	ENSG00000231767	RPS27AP5	135.371	0.910533	0.491149	1.85388	0.0637562	0.291882	82.442	94.1564	176.674	235.746	87.8366
686	ENSG00000070961	ATP2B1	1207.66	-0.540052	0.292916	-1.84371	0.0652249	0.293604	1390.72	1581.54	802.942	1195.66	1067.44
687	ENSG00000072062	PRKACA	143.46	0.900765	0.488656	1.84335	0.0652774	0.293604	106.978	81.4134	206.998	231.839	90.0697
688	ENSG00000103769	RAB11A	188.551	0.911277	0.493733	1.84569	0.0649375	0.293604	97.1638	148.668	329.615	263.098	104.213
689	ENSG00000125166	GOT2	232.953	0.85006	0.461146	1.84336	0.0652758	0.293604	168.81	145.128	300.609	415.486	134.732
690	ENSG00000130449	ZSWIM6	171.404	0.939012	0.509314	1.84368	0.0652299	0.293604	95.2009	125.306	150.304	368.597	117.612
691	ENSG00000136942	RPL35	6158.08	0.595674	0.322921	1.84465	0.0650891	0.293604	4679.57	4744.63	8519.88	8479.04	4367.26
692	ENSG00000144867	SRPRB	130.048	-0.801695	0.434529	-1.84497	0.0650414	0.293604	139.366	209.551	97.566	115.919	87.8366
693	ENSG00000148175	STOM	107.415	0.827093	0.447295	1.8491	0.0644436	0.293604	73.609	72.9181	151.623	125.037	113.89
694	ENSG00000148468	FAM171A1	69.1993	-0.997954	0.540065	-1.84784	0.0646254	0.293604	104.034	94.1564	35.5984	48.1912	64.0165
695	ENSG00000158710	TAGLN2	535.267	0.60278	0.326167	1.84807	0.0645916	0.293604	423.006	394.324	482.556	592.621	783.83
696	ENSG00000165934	CPSF2	92.6132	-0.936464	0.508158	-1.84286	0.0653494	0.293604	152.125	108.315	44.8276	67.7281	90.0697
697	ENSG00000180818	HOXC10	125.437	-0.997272	0.539067	-1.85	0.0643139	0.293604	203.161	154.332	159.534	52.0986	58.0615
698	ENSG00000183160	TMEM119	118.546	1.08584	0.586999	1.84981	0.064341	0.293604	61.8315	79.2896	123.935	269.61	58.0615
699	ENSG00000023909	GCLM	207.369	-0.688559	0.374361	-1.83929	0.0658725	0.295524	263.029	273.266	200.406	165.413	134.732
700	ENSG00000138592	USP8	164.869	-0.80101	0.435649	-1.83866	0.0659651	0.295524	248.308	195.392	147.667	78.1478	154.831
701	ENSG00000104866	PPP1R37	81.0533	1.1692	0.63627	1.83758	0.0661246	0.295815	41.221	50.9719	116.024	162.808	34.2414
702	ENSG00000151461	UPF2	166.716	-0.746268	0.406425	-1.83617	0.0663318	0.29632	260.085	180.525	105.477	144.573	142.92
703	ENSG00000160789	LMNA	488.666	0.542676	0.296031	1.83317	0.0667769	0.297884	398.47	368.838	555.071	557.455	563.494
704	ENSG00000128591	FLNC	244.611	0.777573	0.425081	1.82924	0.0673641	0.299658	143.292	198.224	316.43	394.647	170.462
705	ENSG00000139233	LLPH	155.205	-1.01909	0.557115	-1.82923	0.0673656	0.299658	162.921	282.469	197.769	44.2838	88.5809
706	ENSG00000131143	COX4I1	616.323	0.549322	0.300433	1.82843	0.0674845	0.299761	408.284	555.735	679.007	715.053	723.535
707	ENSG00000008294	SPAG9	208.796	-0.853773	0.467218	-1.82736	0.0676462	0.300051	329.768	242.116	154.26	78.1478	239.69
708	ENSG00000164741	DLC1	148.039	0.726313	0.397604	1.82672	0.0677411	0.300051	112.867	99.82	167.444	188.857	171.207
709	ENSG00000260109	0	190.069	0.871356	0.477449	1.82502	0.0679973	0.300761	112.867	140.173	268.966	320.406	107.935
710	ENSG00000083896	YTHDC1	399.785	0.662753	0.363584	1.82283	0.0683289	0.300819	352.342	239.993	419.27	622.578	364.745
711	ENSG00000100417	PMM1	75.8861	1.04298	0.572644	1.82134	0.0685551	0.300819	42.2025	50.264	64.6045	152.388	69.9715
712	ENSG00000113712	CSNK1A1	516.635	0.594819	0.326619	1.82114	0.0685859	0.300819	360.193	431.137	453.55	630.392	707.903
713	ENSG00000152082	MZT2B	271.497	0.619741	0.339796	1.82386	0.0681732	0.300819	182.55	227.958	309.838	312.591	324.549
714	ENSG00000169439	SDC2	77.7445	1.21729	0.668093	1.82203	0.0684502	0.300819	40.2396	46.0163	69.8783	195.37	37.2189
715	ENSG00000278311	GGNBP2	469.081	0.581549	0.318909	1.82356	0.0682191	0.300819	345.471	376.626	582.759	609.553	430.995
716	ENSG00000120265	PCMT1	154.08	0.88972	0.488957	1.81963	0.0688155	0.301221	86.3678	116.811	159.534	298.264	109.424
717	ENSG00000129351	ILF3	434.556	-0.630805	0.346975	-1.81801	0.0690619	0.301221	476.005	628.653	294.016	307.381	466.725
718	ENSG00000137166	FOXP4	69.4473	1.12569	0.618844	1.81902	0.0689079	0.301221	33.3694	47.4322	75.1522	145.876	45.407
719	ENSG00000163320	CGGBP1	77.4815	0.970103	0.5336	1.81803	0.0690592	0.301221	44.1654	53.8037	130.527	91.1725	67.7384
720	ENSG00000138385	SSB	183.626	-0.811642	0.447476	-1.81382	0.0697048	0.302762	215.92	280.345	93.6106	114.617	213.636
721	ENSG00000144043	TEX261	121.704	0.852923	0.470192	1.81399	0.0696794	0.302762	81.4606	82.1214	187.221	165.413	92.3028
722	ENSG00000204568	MRPS18B	362.624	-0.636817	0.350911	-1.81475	0.0695621	0.302762	449.505	472.198	378.398	295.659	217.358
723	ENSG00000111845	PAK1IP1	68.257	-0.952301	0.526036	-1.81033	0.0702443	0.304683	94.2195	98.4041	44.8276	44.2838	59.5502
724	ENSG00000048649	RSF1	369.774	-0.575615	0.3189	-1.805	0.0710744	0.30491	488.764	432.553	288.743	347.758	291.052
725	ENSG00000088367	EPB41L1	110.942	-0.801281	0.44382	-1.80542	0.071009	0.30491	154.088	144.42	89.6552	69.0306	97.5135
726	ENSG00000113810	SMC4	375.929	-0.585528	0.324115	-1.80655	0.0708331	0.30491	446.561	494.144	275.558	295.659	367.723
727	ENSG00000123933	MXD4	127.679	0.911872	0.5051	1.80533	0.0710232	0.30491	95.2009	71.5022	214.909	177.135	79.6484
728	ENSG00000124098	FAM210B	97.1008	0.859148	0.47575	1.80588	0.0709371	0.30491	66.7388	63.7149	93.6106	149.783	111.657
729	ENSG00000164346	NSA2	506.732	0.586866	0.324727	1.80726	0.0707217	0.30491	370.989	408.483	539.25	478.004	736.934
730	ENSG00000165678	GHITM	125.839	0.752706	0.416937	1.80532	0.0710243	0.30491	86.3678	92.0326	147.667	144.573	158.552
731	ENSG00000179833	SERTAD2	82.0789	0.8787	0.48647	1.80628	0.0708749	0.30491	51.0355	58.0513	96.2475	106.802	98.2578
732	ENSG00000116133	DHCR24	84.3462	-1.03317	0.572832	-1.80361	0.0712919	0.305009	94.2195	150.084	38.2353	41.6788	97.5135
733	ENSG00000147548	NSD3	419.445	0.727725	0.403481	1.80361	0.0712919	0.305009	279.714	321.406	436.41	761.941	297.751
734	ENSG00000100852	ARHGAP5	72.7954	-1.00778	0.559486	-1.80126	0.0716617	0.305954	79.4977	129.554	39.5538	41.6788	73.6934
735	ENSG00000204070	SYS1	131.214	0.837572	0.465068	1.80097	0.0717079	0.305954	89.3122	88.4929	158.215	218.814	101.235
736	ENSG00000138593	SECISBP2L	72.1019	-1.05067	0.583793	-1.79973	0.0719036	0.306372	98.1453	111.855	43.5092	27.3517	79.6484
737	ENSG00000125534	PPDPF	783.894	-1.47969	0.823009	-1.7979	0.0721923	0.307184	892.141	1657.29	221.501	286.542	861.989
738	ENSG00000184983	NDUFA6	151.36	0.760781	0.423389	1.79688	0.072354	0.307455	85.3864	128.138	193.814	143.271	206.193
739	ENSG00000080493	SLC4A4	74.6507	1.25188	0.698894	1.79123	0.0732569	0.30898	51.0355	30.4415	139.757	128.944	23.0757
740	ENSG00000100614	PPM1A	137.809	0.755631	0.421811	1.7914	0.0732295	0.30898	83.4235	111.147	159.534	192.765	142.176
741	ENSG00000115415	STAT1	221.993	-0.80883	0.451502	-1.79142	0.0732259	0.30898	294.436	305.123	121.298	110.709	278.397
742	ENSG00000171451	DSEL	175.819	-0.822558	0.459125	-1.79158	0.0732009	0.30898	234.567	240.701	80.426	210.999	112.401
743	ENSG00000185624	P4HB	88.3187	-0.880521	0.491655	-1.79093	0.0733038	0.30898	137.403	106.191	77.7891	49.4936	70.7159
744	ENSG00000204392	LSM2	71.4027	1.06897	0.596431	1.79228	0.0730874	0.30898	35.3323	50.264	87.0183	136.759	47.6402
745	ENSG00000163382	NAXE	681.256	0.765873	0.428448	1.78755	0.073848	0.310855	451.468	506.887	1041.58	1070.63	335.714
746	ENSG00000077380	DYNC1I2	623.926	0.564597	0.316507	1.78384	0.0744501	0.31245	493.671	475.03	698.783	890.885	561.261
747	ENSG00000167378	IRGQ	84.0189	0.995357	0.558386	1.78256	0.0746579	0.31245	40.2396	64.4228	110.751	145.876	58.8058
748	ENSG00000174938	SEZ6L2	72.5109	-0.998241	0.560228	-1.78185	0.0747739	0.31245	94.2195	112.563	32.9615	78.1478	44.6627
749	ENSG00000184640	SEPTIN9	251.087	0.678969	0.381035	1.78191	0.0747639	0.31245	224.753	144.42	352.029	298.264	235.968
750	ENSG00000196235	SUPT5H	123.154	-0.747811	0.419756	-1.78154	0.0748245	0.31245	171.754	153.624	101.521	89.87	99.0022
751	ENSG00000205871	RPS3AP47	108.837	0.786114	0.440772	1.78349	0.0745063	0.31245	79.4977	72.2102	126.572	144.573	121.334
752	ENSG00000115307	AUP1	275.405	0.601396	0.337696	1.78088	0.0749325	0.312484	191.383	228.666	305.883	339.943	311.15
753	ENSG00000091164	TXNL1	172.135	0.847582	0.47674	1.77787	0.0754248	0.313703	71.6461	159.995	254.463	243.561	131.01
754	ENSG00000175215	CTDSP2	71.869	1.141	0.64163	1.77828	0.0753572	0.313703	44.1654	38.9369	101.521	141.969	32.7526
755	ENSG00000124942	AHNAK	432.507	-0.660207	0.371693	-1.77621	0.0756976	0.314421	496.615	613.787	371.806	218.814	461.514
756	ENSG00000257704	INAFM1	65.4935	1.00543	0.566454	1.77495	0.0759054	0.314867	43.1839	38.2289	97.566	96.3823	52.1064
757	ENSG00000163064	EN1	78.5836	1.13664	0.640722	1.774	0.0760626	0.315102	50.0541	41.0607	122.617	147.178	32.0082
758	ENSG00000143079	CTTNBP2NL	85.8941	-0.964795	0.544077	-1.77327	0.0761842	0.315189	148.199	95.5723	60.6491	36.469	88.5809
759	ENSG00000137770	CTDSPL2	88.4028	1.0377	0.585478	1.77241	0.0763272	0.315365	60.8501	47.4322	192.495	58.6109	82.6259
760	ENSG00000138709	LARP1B	71.8079	1.00195	0.565743	1.77103	0.0765549	0.31589	35.3323	53.8037	100.203	114.617	55.0839
761	ENSG00000148019	CEP78	83.5212	-0.915719	0.517854	-1.7683	0.0770111	0.316108	103.053	128.846	61.9676	82.0552	41.6851
762	ENSG00000151718	WWC2	112.538	-0.950261	0.537352	-1.76841	0.0769916	0.316108	176.662	140.881	98.8844	33.8641	112.401
763	ENSG00000178996	SNX18	85.0628	1.04561	0.59082	1.76976	0.0767677	0.316108	53.9799	49.556	81.7445	184.95	55.0839
764	ENSG00000196628	TCF4	325.801	0.589097	0.333138	1.76833	0.0770063	0.316108	246.345	253.444	439.047	368.597	321.571
765	ENSG00000116729	WLS	125.161	0.816787	0.462453	1.7662	0.0773615	0.316367	89.3122	82.1214	197.769	157.598	99.0022
766	ENSG00000131435	PDLIM4	124.448	0.762392	0.431555	1.76661	0.0772928	0.316367	87.3493	88.4929	122.617	145.876	177.906
767	ENSG00000178695	KCTD12	133.141	0.806226	0.456497	1.76611	0.0773767	0.316367	88.3308	94.8644	185.903	195.37	101.235
768	ENSG00000035928	RFC1	106.69	-0.823081	0.466339	-1.76498	0.0775666	0.31673	149.181	140.173	58.0122	83.3577	102.724
769	ENSG00000290720	ZNF542P	76.5514	-0.964567	0.546782	-1.76408	0.0777185	0.316938	93.238	123.89	47.4645	37.7715	80.3928
770	ENSG00000181467	RAP2B	95.9602	0.880654	0.499575	1.76281	0.077933	0.316988	44.1654	82.8293	108.114	141.969	102.724
771	ENSG00000197451	HNRNPAB	236.555	0.680484	0.385897	1.76338	0.0778359	0.316988	161.94	184.773	309.838	333.431	192.794
772	ENSG00000154096	THY1	151.755	-0.761832	0.432591	-1.76109	0.078223	0.317756	193.346	210.259	102.84	88.5675	163.763
773	ENSG00000261236	BOP1	65.9234	-1.16683	0.663363	-1.75897	0.0785829	0.318805	103.053	95.5723	14.5031	39.0739	77.4153
774	ENSG00000163754	GYG1	201.18	0.761542	0.433424	1.75704	0.0789118	0.319725	145.255	138.049	297.972	289.147	135.477
775	ENSG00000071127	WDR1	542.797	0.631122	0.359681	1.75467	0.0793152	0.320532	350.379	465.119	735.7	759.336	403.453
776	ENSG00000189091	SF3B3	111.903	0.859771	0.48984	1.75521	0.079224	0.320532	65.7573	84.2452	196.45	92.4749	120.589
777	ENSG00000085719	CPNE3	76.3484	-0.954241	0.545244	-1.75012	0.0800979	0.322018	100.108	115.395	67.2414	31.2591	67.7384
778	ENSG00000104218	CSPP1	99.1387	-0.797795	0.455834	-1.75019	0.0800856	0.322018	150.162	116.103	76.4706	75.5429	77.4153
779	ENSG00000116898	MRPS15	92.8232	-0.954888	0.545791	-1.74955	0.0801964	0.322018	127.589	135.217	43.5092	46.8887	110.912
780	ENSG00000157570	TSPAN18	201.392	0.988237	0.564253	1.75141	0.079876	0.322018	121.7	130.969	288.743	398.554	66.994
781	ENSG00000204498	NFKBIL1	109.722	0.934163	0.533718	1.75029	0.0800677	0.322018	95.2009	46.7242	147.667	182.345	76.6709
782	ENSG00000008394	MGST1	96.095	-0.969292	0.554387	-1.7484	0.0803945	0.322401	140.348	132.385	83.0629	28.6542	96.0247
783	ENSG00000107863	ARHGAP21	432.198	0.601817	0.34448	1.74703	0.0806317	0.322527	323.879	334.857	574.848	578.294	349.113
784	ENSG00000132341	RAN	254.2	0.596742	0.341476	1.74754	0.0805443	0.322527	196.291	192.56	319.067	273.517	289.563
785	ENSG00000150316	CWC15	520.834	0.695174	0.399191	1.74146	0.0816035	0.325829	489.745	269.726	611.765	851.811	381.121
786	ENSG00000175756	AURKAIP1	93.2823	0.817775	0.469847	1.74051	0.0817689	0.325829	67.7202	60.1752	126.572	115.919	96.0247
787	ENSG00000203875	SNHG5	184.53	-0.741835	0.42608	-1.74107	0.0816715	0.325829	285.603	200.348	121.298	204.487	110.912
788	ENSG00000005483	KMT2E	761.34	0.573505	0.329885	1.7385	0.0821229	0.326824	636.963	540.16	950.609	1074.53	604.435
789	ENSG00000036549	ZZZ3	269.304	0.761856	0.439537	1.73332	0.0830393	0.327398	226.716	152.916	419.27	381.622	165.996
790	ENSG00000072110	ACTN1	1444.68	0.469055	0.270208	1.7359	0.0825809	0.327398	1279.81	1068.29	1728.5	1658.04	1488.76
791	ENSG00000100418	DESI1	101.672	0.954327	0.550382	1.73393	0.0829298	0.327398	63.7944	65.8387	159.534	164.11	55.0839
792	ENSG00000130638	ATXN10	175.173	0.682778	0.393853	1.73358	0.082992	0.327398	114.83	141.589	230.73	222.721	165.996
793	ENSG00000168172	HOOK3	350.003	-0.587926	0.339188	-1.73333	0.0830363	0.327398	466.19	409.191	267.647	362.085	244.9
794	ENSG00000173272	MZT2A	70.8558	1.03201	0.595515	1.73296	0.0831023	0.327398	56.9243	30.4415	52.7384	131.549	82.6259
795	ENSG00000181222	POLR2A	75.1777	-1.04143	0.599552	-1.73702	0.0823832	0.327398	93.238	124.598	67.2414	20.8394	69.9715
796	ENSG00000204120	GIGYF2	473.762	-0.553745	0.319394	-1.73374	0.082965	0.327398	578.076	592.548	403.449	475.399	319.338
797	ENSG00000124151	NCOA3	75.7103	1.00596	0.580775	1.7321	0.083255	0.327588	55.9428	38.2289	127.891	108.104	48.3845
798	ENSG00000151491	EPS8	163.384	0.71883	0.41544	1.73029	0.0835791	0.328451	123.663	111.855	146.349	252.678	182.373
799	ENSG00000147164	SNX12	233.944	0.718737	0.415585	1.72946	0.083727	0.328621	168.81	167.782	390.264	270.912	171.951
800	ENSG00000072506	HSD17B10	162.64	0.758734	0.439227	1.72743	0.0840907	0.329022	116.793	112.563	195.132	264.4	124.311
801	ENSG00000136715	SAP130	94.197	0.905952	0.524718	1.72655	0.0842488	0.329022	52.9985	70.0864	102.84	170.623	74.4378
802	ENSG00000145495	MARCHF6	101.932	-0.842561	0.487728	-1.72752	0.0840742	0.329022	93.238	184.065	72.5153	79.4503	80.3928
803	ENSG00000197081	IGF2R	241.302	-0.812464	0.47057	-1.72655	0.0842478	0.329022	179.606	470.074	268.966	147.178	140.687
804	ENSG00000145685	LHFPL2	81.7347	0.912209	0.52941	1.72307	0.0848764	0.330649	57.9057	48.8481	85.6999	143.271	72.949
805	ENSG00000173674	EIF1AX	151.411	-0.931579	0.540505	-1.72353	0.084792	0.330649	212.975	212.383	54.0568	72.938	204.704
806	ENSG00000030582	GRN	373.824	0.596776	0.346466	1.72246	0.0849854	0.330663	281.677	289.549	416.633	552.245	329.015
807	ENSG00000005884	ITGA3	144.855	0.72897	0.424514	1.71719	0.0859449	0.330703	109.923	97.6961	224.138	145.876	146.642
808	ENSG00000079462	PAFAH1B3	213.809	0.665944	0.387093	1.72037	0.0853647	0.330703	128.57	186.897	274.24	281.332	198.004
809	ENSG00000132388	UBE2G1	90.7583	0.897935	0.521609	1.72147	0.0851654	0.330703	64.7759	54.5116	148.986	118.524	66.994
810	ENSG00000153140	CETN3	272.966	0.619564	0.36064	1.71796	0.085804	0.330703	166.847	245.656	275.558	363.387	313.383
811	ENSG00000160991	ORAI2	191.77	-0.626739	0.364711	-1.71845	0.0857145	0.330703	252.233	234.329	155.578	153.691	163.019
812	ENSG00000162889	MAPKAPK2	333.111	0.603824	0.351633	1.7172	0.0859427	0.330703	298.362	209.551	374.442	462.375	320.827
813	ENSG00000164985	PSIP1	356.489	-0.549846	0.319472	-1.72111	0.085231	0.330703	414.173	466.534	276.876	294.357	330.504
814	ENSG00000173905	GOLIM4	307.725	-0.62989	0.366403	-1.71912	0.085593	0.330703	402.396	380.165	232.049	187.555	336.459
815	ENSG00000198408	OGA	227.879	-0.704397	0.410139	-1.71746	0.0858951	0.330703	322.898	271.85	137.12	143.271	264.254
816	ENSG00000145833	DDX46	297.46	-0.663949	0.386967	-1.71578	0.0862027	0.331289	381.785	383.705	184.584	188.857	348.369
817	ENSG00000061273	HDAC7	195.743	0.932206	0.544382	1.71241	0.0868207	0.332575	160.958	93.4485	189.858	98.9872	435.461
818	ENSG00000131437	KIF3A	82.0847	-0.957028	0.558938	-1.71222	0.0868554	0.332575	103.053	128.138	34.2799	95.0799	49.8733
819	ENSG00000198121	LPAR1	84.051	0.897432	0.523828	1.71322	0.0866721	0.332575	50.0541	60.8831	65.923	109.407	133.988
820	ENSG00000128923	MINDY2	120.187	-0.818574	0.478573	-1.71045	0.087183	0.333422	139.366	185.481	118.661	54.7035	102.724
821	ENSG00000133059	DSTYK	111.497	-0.751115	0.439771	-1.70797	0.0876426	0.334771	152.125	142.297	88.3368	100.29	74.4378
822	ENSG00000099991	CABIN1	98.3562	-1.04667	0.613484	-1.70611	0.0879872	0.335401	191.383	94.8644	54.0568	28.6542	122.822
823	ENSG00000154380	ENAH	1021.11	-0.566398	0.332018	-1.70593	0.0880215	0.335401	1382.87	1155.36	751.522	632.997	1182.82
824	ENSG00000259160	0	195.715	0.891307	0.524571	1.69911	0.0892976	0.339851	136.422	121.766	254.463	380.319	85.6034
825	ENSG00000102024	PLS3	218.183	0.797833	0.469955	1.69768	0.0895683	0.340468	118.756	182.649	369.169	293.054	127.289
826	ENSG00000180185	FAHD1	109.809	-0.874619	0.515956	-1.69514	0.090048	0.341877	121.7	179.818	50.1015	128.944	68.4827
827	ENSG00000161013	MGAT4B	152.869	0.683736	0.403589	1.69414	0.0902389	0.342188	99.1267	124.598	205.68	177.135	157.808
828	ENSG00000105821	DNAJC2	190.321	-0.694006	0.410283	-1.69153	0.0907355	0.343285	274.807	220.17	137.12	113.314	206.193
829	ENSG00000155368	DBI	255.986	-0.62636	0.370431	-1.6909	0.0908566	0.343285	292.473	357.511	189.858	170.623	269.465
830	ENSG00000260257	0	69.5113	1.05308	0.622637	1.69132	0.0907764	0.343285	53.9799	30.4415	125.254	97.6848	40.1964
831	ENSG00000054116	TRAPPC3	149.87	0.757636	0.448639	1.68874	0.0912683	0.344425	92.2566	118.934	233.367	190.16	114.634
832	ENSG00000102265	TIMP1	1544.77	-0.625324	0.371449	-1.68347	0.0922838	0.346589	1722.45	2195.33	979.615	837.484	1988.98
833	ENSG00000118816	CCNI	300.264	-0.660449	0.392215	-1.6839	0.0922016	0.346589	368.045	403.527	225.457	158.901	345.391
834	ENSG00000150760	DOCK1	126.404	-0.890688	0.528837	-1.68424	0.0921355	0.346589	142.311	207.427	122.617	39.0739	120.589
835	ENSG00000150991	UBC	1996.82	0.570146	0.338664	1.68351	0.0922756	0.346589	1467.27	1625.44	2531.44	2981.34	1378.59
836	ENSG00000236191	RPS15AP25	164.795	0.882728	0.524782	1.68208	0.0925525	0.347183	117.774	100.528	246.552	283.937	75.1821
837	ENSG00000143376	SNX27	115.595	0.837905	0.498341	1.68139	0.092687	0.347272	84.4049	72.2102	176.674	168.018	76.6709
838	ENSG00000113194	FAF2	172.857	-0.639666	0.381338	-1.67742	0.0934595	0.34816	209.049	230.789	154.26	145.876	124.311
839	ENSG00000114554	PLXNA1	110.401	0.901465	0.537415	1.67741	0.093462	0.34816	77.5348	67.2546	206.998	135.456	64.7609
840	ENSG00000129559	NEDD8	546.076	0.567967	0.338726	1.67678	0.0935864	0.34816	372.952	472.906	734.382	707.238	442.905
841	ENSG00000137309	HMGA1	347.86	-0.730897	0.435899	-1.67676	0.0935903	0.34816	444.598	470.782	195.132	168.018	460.77
842	ENSG00000141569	TRIM65	93.6853	-1.08389	0.645576	-1.67895	0.0931618	0.34816	124.645	148.668	55.3753	121.129	18.6094
843	ENSG00000168495	POLR3D	108.706	0.775456	0.46227	1.6775	0.0934456	0.34816	69.6832	82.8293	97.566	134.154	159.297
844	ENSG00000103653	CSK	107.545	0.977997	0.583808	1.6752	0.0938946	0.348878	78.5162	57.3434	72.5153	247.468	81.8815
845	ENSG00000122359	ANXA11	286.223	0.619413	0.370445	1.67208	0.0945093	0.350747	162.921	269.726	366.532	276.122	355.812
846	ENSG00000069275	NUCKS1	7641.64	0.574415	0.344156	1.66905	0.0951071	0.352088	6018.27	5796.64	9647.17	11804.2	4941.92
847	ENSG00000104356	POP1	96.6803	-0.911216	0.546484	-1.66741	0.095432	0.352088	164.884	104.068	38.2353	110.709	65.5052
848	ENSG00000143614	GATAD2B	210.778	0.664946	0.398652	1.66799	0.095318	0.352088	159.977	151.5	243.915	324.313	174.184
849	ENSG00000225779	0	94.6291	0.89355	0.535224	1.66949	0.0950206	0.352088	68.7017	55.9275	138.438	149.783	60.2946
850	ENSG00000270992	0	145.238	0.79083	0.474175	1.6678	0.095355	0.352088	103.053	98.4041	200.406	230.536	93.7916
851	ENSG00000130164	LDLR	133.596	0.766816	0.46012	1.66656	0.0956024	0.352302	105.015	82.8293	143.712	224.024	112.401
852	ENSG00000070010	UFD1	80.95	0.828727	0.498813	1.6614	0.096634	0.353986	56.9243	53.8037	93.6106	82.0552	118.356
853	ENSG00000111642	CHD4	80.5324	-0.827219	0.497987	-1.66112	0.0966885	0.353986	103.053	114.687	73.8337	61.2158	49.8733
854	ENSG00000113916	BCL6	83.7018	0.931097	0.560029	1.66259	0.0963952	0.353986	44.1654	63.7149	159.534	88.5675	62.5277
855	ENSG00000123066	MED13L	388.302	0.731754	0.439849	1.66365	0.0961832	0.353986	317.009	238.577	650	527.498	208.426
856	ENSG00000138668	HNRNPD	638.302	0.536779	0.323658	1.65848	0.0972213	0.353986	511.337	492.728	841.177	824.46	521.809
857	ENSG00000147471	PLPBP	81.664	-0.866123	0.52181	-1.65984	0.0969462	0.353986	112.867	111.855	40.8722	58.6109	84.1147
858	ENSG00000153914	SREK1	315.38	-0.577331	0.347349	-1.66211	0.0964914	0.353986	411.229	375.918	279.513	200.579	309.661
859	ENSG00000160208	RRP1B	73.7969	-0.980185	0.590845	-1.65895	0.0971249	0.353986	120.719	89.9088	46.1461	27.3517	84.859
860	ENSG00000182220	ATP6AP2	134.763	0.69393	0.418112	1.65967	0.0969803	0.353986	91.2751	105.484	134.483	160.203	182.373
861	ENSG00000183726	TMEM50A	67.0799	-0.950553	0.573285	-1.65808	0.097301	0.353986	58.8872	129.554	58.0122	44.2838	44.6627
862	ENSG00000196683	TOMM7	146.479	0.841511	0.507094	1.65948	0.0970199	0.353986	84.4049	114.687	106.795	130.246	296.262
863	ENSG00000125817	CENPB	380.787	0.645777	0.39012	1.65533	0.0978572	0.354174	269.9	298.044	490.467	588.714	256.81
864	ENSG00000125868	DSTN	865.749	0.458728	0.276834	1.65705	0.0975097	0.354174	689.961	723.518	999.392	1026.34	889.531
865	ENSG00000135090	TAOK3	594.312	0.54389	0.328406	1.65615	0.0976916	0.354174	506.43	425.474	791.076	758.034	490.545
866	ENSG00000147140	NONO	520.168	-0.537364	0.32448	-1.65608	0.0977059	0.354174	723.331	555.027	526.065	442.838	353.579
867	ENSG00000149091	DGKZ	157.142	0.842948	0.509323	1.65504	0.0979172	0.354174	101.09	111.147	214.909	277.425	81.1372
868	ENSG00000188706	ZDHHC9	362.608	0.635683	0.384241	1.65438	0.0980497	0.354244	271.862	271.85	378.398	609.553	281.375
869	ENSG00000009954	BAZ1B	476.797	-0.506813	0.30672	-1.65237	0.0984598	0.35448	513.3	646.352	379.716	418.091	426.528
870	ENSG00000100804	PSMB5	380.707	0.663299	0.40164	1.65147	0.0986417	0.35448	317.009	246.364	497.059	595.226	247.878
871	ENSG00000128805	ARHGAP22	100.598	0.801004	0.484973	1.65165	0.0986064	0.35448	69.6832	69.3784	166.126	89.87	107.935
872	ENSG00000136261	BZW2	163.936	-0.639311	0.387159	-1.65129	0.0986803	0.35448	184.513	232.913	134.483	131.549	136.221
873	ENSG00000173706	HEG1	84.5145	-0.841548	0.509214	-1.65264	0.0984039	0.35448	108.941	121.766	47.4645	57.3084	87.0922
874	ENSG00000144566	RAB5A	84.7202	0.866629	0.525197	1.6501	0.098922	0.354675	48.0912	65.1308	138.438	67.7281	104.213
875	ENSG00000290018	0	89.6995	0.988359	0.599037	1.64991	0.0989607	0.354675	68.7017	43.8925	126.572	165.413	43.9183
876	ENSG00000139624	CERS5	73.0593	0.93833	0.569804	1.64676	0.0996075	0.356586	52.9985	41.0607	102.84	118.524	49.8733
877	ENSG00000235761	MTCO3P46	73.0664	0.971135	0.590612	1.64429	0.100117	0.358002	47.1097	45.3083	148.986	70.333	53.5952
878	ENSG00000072518	MARK2	85.0744	0.918247	0.559319	1.64172	0.100647	0.359488	58.8872	51.6798	135.801	127.641	51.3621
879	ENSG00000180304	OAZ2	211.32	0.743869	0.453809	1.63917	0.101178	0.360562	173.717	126.722	334.889	291.752	129.522
880	ENSG00000254635	WAC-AS1	107.997	-0.851028	0.519033	-1.63964	0.10108	0.360562	136.422	158.579	39.5538	114.617	90.8141
881	ENSG00000091879	ANGPT2	67.6453	1.02506	0.625949	1.63761	0.101503	0.36131	47.1097	36.1051	130.527	87.2651	37.2189
882	ENSG00000185222	TCEAL9	314.248	-0.552478	0.337788	-1.63558	0.101928	0.362412	370.989	406.359	267.647	218.814	307.428
883	ENSG00000091986	CCDC80	4601.7	0.650844	0.398361	1.63381	0.1023	0.36332	3870.85	2986.1	6219.17	7576.43	2355.96
884	ENSG00000099341	PSMD8	261.126	0.667198	0.408846	1.6319	0.1027	0.364055	139.366	245.656	407.404	289.147	224.058
885	ENSG00000111540	RAB5B	140.38	0.793281	0.486327	1.63117	0.102855	0.364055	108.941	85.6611	220.183	199.277	87.8366
886	ENSG00000277443	MARCKS	469.302	-0.545343	0.33427	-1.63145	0.102796	0.364055	656.592	499.808	458.824	429.813	301.473
887	ENSG00000107862	GBF1	104.49	0.927436	0.569214	1.62933	0.103244	0.364521	57.9057	77.1658	228.093	88.5675	70.7159
888	ENSG00000107957	SH3PXD2A	303.31	-0.574515	0.352563	-1.62954	0.103199	0.364521	441.654	313.619	249.189	296.962	215.125
889	ENSG00000171206	TRIM8	131.425	0.743306	0.456325	1.6289	0.103335	0.364521	104.034	82.8293	188.54	179.74	101.98
890	ENSG00000053254	FOXN3	157.062	0.769189	0.472802	1.62687	0.103764	0.365212	104.034	116.103	205.68	260.493	99.0022
891	ENSG00000141429	GALNT1	272.944	0.584237	0.359092	1.62698	0.10374	0.365212	222.79	197.516	374.442	240.956	329.015
892	ENSG00000164104	HMGB2	702.604	0.610887	0.375957	1.62489	0.104187	0.365909	591.816	475.03	926.877	1066.72	452.582
893	ENSG00000240371	RPS4XP13	760.246	0.612552	0.376991	1.62485	0.104195	0.365909	579.057	574.142	1093	1087.56	467.469
894	ENSG00000122566	HNRNPA2B1	565.445	0.548406	0.337704	1.62393	0.104391	0.366105	534.892	350.432	800.305	616.065	525.531
895	ENSG00000175782	SLC35E3	67.4845	-0.871459	0.536962	-1.62294	0.104602	0.366105	90.2937	94.8644	65.923	41.6788	44.6627
896	ENSG00000222041	CYTOR	266.746	0.685985	0.422572	1.62336	0.104514	0.366105	169.791	221.586	233.367	226.629	482.357
897	ENSG00000055332	EIF2AK2	88.0733	-0.793205	0.490034	-1.61867	0.105518	0.368613	105.997	130.262	75.1522	50.7961	78.1596
898	ENSG00000103363	ELOB	143.245	-0.668358	0.413082	-1.61798	0.105667	0.368613	156.051	212.383	123.935	100.29	123.567
899	ENSG00000151552	QDPR	65.8318	1.03455	0.639465	1.61783	0.105699	0.368613	56.9243	24.0701	56.6938	134.154	57.3171
900	ENSG00000161544	CYGB	90.1405	0.852709	0.527204	1.61742	0.105788	0.368613	45.1468	76.4578	85.6999	88.5675	154.831
901	ENSG00000009335	UBE3C	241.516	-0.584949	0.362152	-1.6152	0.106267	0.368917	320.935	282.469	183.266	247.468	173.44
902	ENSG00000049323	LTBP1	324.179	0.569218	0.352329	1.61559	0.106184	0.368917	192.365	309.371	361.258	410.276	347.624
903	ENSG00000185721	DRG1	159.188	0.766998	0.47468	1.61582	0.106133	0.368917	96.1824	127.43	119.98	298.264	154.086
904	ENSG00000231369	0	118.953	0.804477	0.498178	1.61484	0.106346	0.368917	79.4977	84.2452	175.355	179.74	75.9265
905	ENSG00000126062	TMEM115	76.0344	0.898812	0.556851	1.6141	0.106506	0.369063	61.8315	38.2289	113.388	109.407	57.3171
906	ENSG00000023191	RNH1	93.3044	0.857676	0.532403	1.61095	0.10719	0.369633	76.5533	49.556	113.388	67.7281	159.297
907	ENSG00000123144	TRIR	254.526	0.616144	0.382676	1.61009	0.107377	0.369633	222.79	162.827	383.672	274.82	228.524
908	ENSG00000167470	MIDN	148.034	-0.742369	0.460571	-1.61185	0.106996	0.369633	255.178	135.217	88.3368	154.993	106.446
909	ENSG00000182512	GLRX5	99.7446	-0.722616	0.44836	-1.61169	0.10703	0.369633	129.552	131.677	81.7445	76.8454	78.904
910	ENSG00000203914	HSP90B3P	96.6169	1.07478	0.667178	1.61093	0.107194	0.369633	67.7202	48.1401	131.846	207.092	28.2863
911	ENSG00000244753	RPL15P21	127.339	0.733715	0.455651	1.61026	0.107342	0.369633	96.1824	85.6611	160.852	192.765	101.235
912	ENSG00000197879	MYO1C	845.61	0.532764	0.331098	1.60908	0.107599	0.36999	781.236	552.196	1140.47	1069.32	684.827
913	ENSG00000143621	ILF2	75.3764	-0.854219	0.531105	-1.60838	0.107752	0.370109	120.719	85.6611	65.923	39.0739	65.5052
914	ENSG00000015153	YAF2	107.172	0.769848	0.478879	1.6076	0.107922	0.370288	68.7017	81.4134	170.081	126.339	89.3253
915	ENSG00000226080	RPL6P4	83.5424	0.869206	0.541431	1.60539	0.108409	0.371552	40.2396	70.7943	125.254	115.919	65.5052
916	ENSG00000100105	PATZ1	139.347	0.832965	0.519508	1.60337	0.108852	0.372665	70.6646	118.226	188.54	239.653	79.6484
917	ENSG00000197712	FAM114A1	690.707	-0.475858	0.296957	-1.60245	0.109056	0.372956	843.068	817.674	702.739	580.899	509.154
918	ENSG00000114030	KPNA1	136.561	-0.715714	0.446887	-1.60155	0.109254	0.373226	193.346	164.243	118.661	70.333	136.221
919	ENSG00000124614	RPS10	162.197	0.651266	0.407989	1.59628	0.110425	0.376816	134.459	107.607	145.031	216.209	207.681
920	ENSG00000204262	COL5A2	3449.12	1.22728	0.769135	1.59567	0.110563	0.376876	2176.86	1645.26	4576.37	7279.47	1567.66
921	ENSG00000132912	DCTN4	130.036	0.810888	0.508717	1.59399	0.110939	0.377747	110.904	67.9625	229.412	156.296	85.6034
922	ENSG00000100941	PNN	343.229	0.572273	0.359525	1.59175	0.111442	0.378226	275.788	254.859	493.104	415.486	276.908
923	ENSG00000103429	BFAR	172.028	-0.663874	0.41698	-1.5921	0.111362	0.378226	234.567	207.427	94.9291	181.042	142.176
924	ENSG00000115756	HPCAL1	119.197	0.680785	0.427495	1.5925	0.111273	0.378226	86.3678	88.4929	141.075	154.993	125.055
925	ENSG00000128585	MKLN1	137.22	-0.693998	0.436717	-1.58912	0.112032	0.379433	163.903	191.853	81.7445	145.876	102.724
926	ENSG00000149532	CPSF7	147.763	0.803367	0.505644	1.5888	0.112105	0.379433	87.3493	116.103	263.692	187.555	84.1147
927	ENSG00000165795	NDRG2	117.945	0.763508	0.48063	1.58856	0.11216	0.379433	85.3864	80.7055	102.84	208.394	112.401
928	ENSG00000173264	GPR137	95.4182	0.956222	0.60238	1.58741	0.112421	0.379872	54.9614	66.5466	214.909	88.5675	52.1064
929	ENSG00000185896	LAMP1	239.63	-0.645779	0.40694	-1.58691	0.112532	0.379872	241.437	370.962	135.801	190.16	259.788
930	ENSG00000118257	NRP2	90.2345	0.754258	0.475567	1.58602	0.112735	0.380148	58.8872	68.6705	125.254	101.592	96.7691
931	ENSG00000172809	RPL38	544.16	-0.504028	0.318046	-1.58477	0.11302	0.380698	523.114	798.56	446.958	493.634	458.537
932	ENSG00000173511	VEGFB	109.455	0.766112	0.483612	1.58415	0.113161	0.380764	87.3493	66.5466	139.757	168.018	85.6034
933	ENSG00000015676	NUDCD3	100.385	0.714769	0.451543	1.58295	0.113433	0.381212	70.6646	74.334	125.254	108.104	123.567
934	ENSG00000119004	CYP20A1	173.712	-0.598174	0.378121	-1.58197	0.113657	0.381212	211.994	224.418	129.209	151.086	151.853
935	ENSG00000143569	UBAP2L	291.667	-0.540381	0.34159	-1.58196	0.113659	0.381212	345.471	371.67	250.507	285.24	205.448
936	ENSG00000175416	CLTB	369.948	0.600195	0.379661	1.58087	0.113908	0.381639	268.918	295.212	432.455	582.201	270.953
937	ENSG00000008282	SYPL1	72.9804	0.837163	0.530339	1.57854	0.114441	0.382916	55.9428	43.1845	81.7445	113.314	70.7159
938	ENSG00000177697	CD151	619.53	-0.482842	0.305956	-1.57814	0.114533	0.382916	711.553	782.985	572.211	427.208	603.69
939	ENSG00000010244	ZNF207	230.703	0.65951	0.418865	1.57452	0.115368	0.383509	190.402	151.5	365.213	282.635	163.763
940	ENSG00000091409	ITGA6	82.5277	0.85721	0.543701	1.57662	0.114883	0.383509	67.7202	43.1845	131.846	108.104	61.7833
941	ENSG00000132485	ZRANB2	415.758	0.499117	0.317063	1.57419	0.115444	0.383509	328.787	336.981	473.327	539.22	400.475
942	ENSG00000136950	ARPC5L	101.951	0.865975	0.549951	1.57464	0.11534	0.383509	69.6832	66.5466	83.0629	212.302	78.1596
943	ENSG00000170801	HTRA3	81.2482	0.985282	0.625599	1.57494	0.11527	0.383509	58.8872	43.1845	102.84	164.11	37.2189
944	ENSG00000177666	PNPLA2	195.494	0.770069	0.48855	1.57623	0.114972	0.383509	156.051	118.226	247.87	350.363	104.957
945	ENSG00000117519	CNN3	189.32	0.719857	0.457935	1.57196	0.115959	0.384414	135.44	136.633	262.373	298.264	113.89
946	ENSG00000162599	NFIA	145.817	0.705317	0.448689	1.57195	0.115962	0.384414	109.923	101.236	237.323	166.715	113.89
947	ENSG00000109519	GRPEL1	173.446	0.664412	0.423207	1.56994	0.116428	0.38554	111.886	144.42	279.513	154.993	176.417
948	ENSG00000110367	DDX6	130.159	-0.838131	0.534393	-1.56838	0.116793	0.38554	192.365	162.119	36.9169	132.851	126.544
949	ENSG00000115310	RTN4	1079.96	0.444039	0.283094	1.56852	0.11676	0.38554	974.583	802.099	1245.94	1048.48	1328.71
950	ENSG00000206527	HACD2	170.937	0.689203	0.439159	1.56937	0.116562	0.38554	133.478	116.103	199.087	278.727	127.289
951	ENSG00000188895	MSL1	105.044	-0.830647	0.530099	-1.56697	0.117123	0.385816	161.94	123.89	38.2353	87.2651	113.89
952	ENSG00000214063	TSPAN4	86.8775	0.777353	0.496041	1.56712	0.117087	0.385816	61.8315	60.1752	88.3368	88.5675	135.477
953	ENSG00000129562	DAD1	92.967	-0.731304	0.467133	-1.56552	0.117462	0.386527	117.774	126.722	63.286	72.938	84.1147
954	ENSG00000090060	PAPOLA	211.466	0.5837	0.373305	1.5636	0.117911	0.387406	160.958	164.243	300.609	220.116	211.403
955	ENSG00000114857	NKTR	201.502	-0.632408	0.404528	-1.56333	0.117976	0.387406	266.955	245.656	193.814	106.802	194.283
956	ENSG00000189241	TSPYL1	88.8425	-0.761934	0.48816	-1.56083	0.118564	0.38893	102.071	133.093	68.5599	84.6601	55.8283
957	ENSG00000008256	CYTH3	113.717	0.739348	0.474259	1.55895	0.119008	0.389977	104.034	58.7593	104.158	154.993	146.642
958	ENSG00000041357	PSMA4	556.655	-0.476493	0.306189	-1.55621	0.119659	0.39005	736.09	603.875	407.404	522.288	513.621
959	ENSG00000122026	RPL21	263.25	-0.745051	0.479363	-1.55425	0.120124	0.39005	252.233	443.172	221.501	91.1725	308.172
960	ENSG00000135387	CAPRIN1	234.077	0.593749	0.381937	1.55457	0.120048	0.39005	179.606	178.402	336.207	282.635	193.538
961	ENSG00000145216	FIP1L1	86.1285	0.806706	0.517699	1.55825	0.119174	0.39005	53.9799	65.1308	94.9291	72.938	143.665
962	ENSG00000155876	RRAGA	87.9841	0.789204	0.507772	1.55425	0.120125	0.39005	56.9243	65.1308	142.394	100.29	75.1821
963	ENSG00000164099	PRSS12	66.0747	-0.873136	0.561929	-1.55382	0.120227	0.39005	75.5719	105.484	68.5599	44.2838	36.4745
964	ENSG00000168092	PAFAH1B2	192.534	-0.6486	0.417468	-1.55365	0.120268	0.39005	269.9	222.294	205.68	100.29	164.507
965	ENSG00000187231	SESTD1	68.6754	0.844886	0.543198	1.55539	0.119853	0.39005	57.9057	35.3971	90.9737	69.0306	90.0697
966	ENSG00000218739	CEBPZOS	66.8693	-0.813083	0.523094	-1.55437	0.120095	0.39005	83.4235	96.9882	50.1015	49.4936	54.3396
967	ENSG00000225272	0	252.986	0.601954	0.387451	1.55363	0.120274	0.39005	199.235	186.189	348.073	338.641	192.794
968	ENSG00000125944	HNRNPR	798.495	0.517465	0.333316	1.55248	0.120548	0.390132	698.794	569.186	1013.9	1097.98	612.623
969	ENSG00000153976	HS3ST3A1	71.7789	0.942539	0.606982	1.55283	0.120464	0.390132	39.2581	53.0957	129.209	39.0739	98.2578
970	ENSG00000224025	0	86.2313	0.773028	0.498295	1.55135	0.120819	0.390606	56.9243	63.7149	104.158	128.944	77.4153
971	ENSG00000115233	PSMD14	175.214	0.621762	0.402135	1.54615	0.122068	0.394238	130.533	133.801	254.463	203.184	154.086
972	ENSG00000011114	BTBD7	150.725	-0.824922	0.53374	-1.54555	0.122213	0.394302	196.291	212.383	150.304	39.0739	155.575
973	ENSG00000117448	AKR1A1	132.823	0.74962	0.485593	1.54372	0.122656	0.395324	98.1453	89.9088	206.998	184.95	84.1147
974	ENSG00000082701	GSK3B	268.279	0.515828	0.334345	1.5428	0.122879	0.395389	207.087	219.462	299.29	302.172	313.383
975	ENSG00000167325	RRM1	80.1937	-0.804867	0.521761	-1.5426	0.122929	0.395389	115.811	100.528	64.6045	40.3764	79.6484
976	ENSG00000111530	CAND1	155.764	0.645861	0.419262	1.54047	0.123446	0.396645	119.737	112.563	232.049	179.74	134.732
977	ENSG00000188342	GTF2F2	97.1501	0.789127	0.513016	1.53821	0.123997	0.398008	51.0355	83.5373	158.215	113.314	79.6484
978	ENSG00000227747	0	105.695	0.773171	0.503287	1.53624	0.124479	0.399147	67.7202	79.9976	142.394	165.413	72.949
979	ENSG00000017797	RALBP1	175.478	-0.617323	0.402267	-1.53461	0.12488	0.399668	208.068	235.745	170.081	104.197	159.297
980	ENSG00000069849	ATP1B3	421.303	-0.512459	0.333949	-1.53454	0.124896	0.399668	620.278	407.067	392.901	317.801	368.467
981	ENSG00000120708	TGFBI	179.343	0.677146	0.442442	1.53048	0.125899	0.402466	139.366	125.306	177.992	140.666	313.383
982	ENSG00000170027	YWHAG	576.363	0.524339	0.342767	1.52972	0.126085	0.402651	493.671	418.394	796.349	731.985	441.416
983	ENSG00000170776	AKAP13	202.57	0.605159	0.396273	1.52713	0.126729	0.404296	163.903	144.42	311.156	210.999	182.373
984	ENSG00000104805	NUCB1	228.745	-0.601029	0.39387	-1.52596	0.127021	0.404814	319.954	256.275	134.483	183.647	249.366
985	ENSG00000067560	RHOA	180.952	-0.695855	0.456263	-1.52512	0.12723	0.405068	209.049	261.939	93.6106	114.617	225.546
986	ENSG00000067057	PFKP	112.113	0.701268	0.459973	1.52458	0.127363	0.405081	72.6275	89.9088	170.081	123.734	104.213
987	ENSG00000139211	AMIGO2	120.297	-0.658728	0.432615	-1.52266	0.127843	0.405785	163.903	145.128	87.0183	88.5675	116.867
988	ENSG00000219149	PPIAP87	162.09	0.826034	0.542334	1.52311	0.127731	0.405785	119.737	101.236	230.73	291.752	66.994
989	ENSG00000090273	NUDC	81.2428	-0.855055	0.562924	-1.51895	0.128774	0.406649	69.6832	152.208	39.5538	80.7528	64.0165
990	ENSG00000109606	DHX15	190.624	-0.560759	0.369174	-1.51895	0.128774	0.406649	258.122	214.507	156.897	168.018	155.575
991	ENSG00000122299	ZC3H7A	121.001	0.65377	0.430531	1.51852	0.128883	0.406649	103.053	77.1658	151.623	140.666	132.499
992	ENSG00000137154	RPS6	2036.34	-0.413866	0.272162	-1.52066	0.128345	0.406649	2259.3	2530.9	1603.25	1685.39	2102.87
993	ENSG00000142166	IFNAR1	79.2612	-0.792688	0.522358	-1.51752	0.129136	0.406649	82.442	130.262	56.6938	49.4936	77.4153
994	ENSG00000146872	TLK2	68.3046	-0.793385	0.523076	-1.51677	0.129326	0.406649	79.4977	103.36	56.6938	52.0986	49.8733
995	ENSG00000153827	TRIP12	479.455	0.473346	0.312269	1.51583	0.129563	0.406649	406.321	370.962	585.396	588.714	445.882
996	ENSG00000162576	MXRA8	259.564	-0.5936	0.391826	-1.51496	0.129783	0.406649	286.584	365.299	188.54	158.901	298.495
997	ENSG00000167110	GOLGA2	438.37	-0.459885	0.302979	-1.51788	0.129045	0.406649	520.17	528.125	362.576	410.276	370.7
998	ENSG00000174231	PRPF8	76.5615	-0.758351	0.499013	-1.5197	0.128586	0.406649	96.1824	106.899	59.3307	53.401	66.994
999	ENSG00000175792	RUVBL1	69.5781	0.812164	0.535563	1.51647	0.129401	0.406649	59.8686	36.1051	89.6552	83.3577	78.904
1000	ENSG00000186298	PPP1CC	96.6475	0.769204	0.507291	1.5163	0.129444	0.406649	58.8872	76.4578	163.489	105.5	78.904
1001	ENSG00000228519	RANBP1P1	74.9361	1.00238	0.661687	1.51489	0.129801	0.406649	52.9985	40.3527	183.266	53.401	44.6627
1002	ENSG00000144283	PKP4	129.557	-0.6744	0.445667	-1.51324	0.130219	0.406739	172.736	160.703	143.712	87.2651	83.3703
1003	ENSG00000163904	SENP2	145.676	0.745924	0.492873	1.51342	0.130173	0.406739	119.737	87.077	230.73	204.487	86.3478
1004	ENSG00000165410	CFL2	285.329	0.526141	0.347606	1.51361	0.130124	0.406739	223.771	227.25	309.838	393.344	272.442
1005	ENSG00000151353	TMEM18	177.743	-0.665294	0.43991	-1.51234	0.130446	0.407045	264.011	191.853	172.718	174.53	85.6034
1006	ENSG00000011275	RNF216	135.395	-0.632104	0.419368	-1.50728	0.13174	0.40872	160.958	183.357	88.3368	118.524	125.8
1007	ENSG00000127920	GNG11	168.537	0.720964	0.477921	1.50854	0.131415	0.40872	94.2195	148.668	204.361	108.104	287.33
1008	ENSG00000136280	CCM2	69.6262	0.975007	0.646861	1.50729	0.131736	0.40872	56.9243	31.1495	147.667	72.938	39.452
1009	ENSG00000149090	PAMR1	72.0392	0.940088	0.623741	1.50718	0.131765	0.40872	31.4065	61.591	44.8276	79.4503	142.92
1010	ENSG00000186318	BACE1	85.2707	-0.726981	0.482057	-1.50808	0.131534	0.40872	99.1267	124.598	60.6491	69.0306	72.949
1011	ENSG00000197780	TAF13	361.425	-0.512073	0.339715	-1.50736	0.131718	0.40872	466.19	414.855	366.532	235.746	323.804
1012	ENSG00000168077	SCARA3	74.4003	0.85203	0.56559	1.50645	0.131953	0.408897	49.0726	51.6798	56.6938	76.8454	137.71
1013	ENSG00000077147	TM9SF3	340.323	0.509771	0.338533	1.50582	0.132113	0.40899	229.66	312.911	334.889	389.437	434.717
1014	ENSG00000008988	RPS20	977.005	0.407769	0.270989	1.50474	0.13239	0.40904	826.383	807.763	1053.45	1045.88	1151.55
1015	ENSG00000108344	PSMD3	156.87	0.611232	0.406204	1.50474	0.13239	0.40904	122.682	115.395	226.775	165.413	154.086
1016	ENSG00000132361	CLUH	100.368	-0.806452	0.537606	-1.50008	0.133593	0.411541	87.3493	183.357	63.286	54.7035	113.145
1017	ENSG00000134352	IL6ST	183.926	-0.599101	0.399372	-1.50011	0.133587	0.411541	225.734	237.161	146.349	114.617	195.771
1018	ENSG00000198791	CNOT7	147.878	0.701861	0.467705	1.50065	0.133447	0.411541	116.793	97.6961	229.412	197.974	97.5135
1019	ENSG00000116132	PRRX1	1302.88	0.559292	0.373951	1.49563	0.13475	0.412759	1323.98	705.111	1630.93	1932.86	921.539
1020	ENSG00000127481	UBR4	345.837	-0.552954	0.369569	-1.49621	0.134598	0.412759	434.784	419.102	292.698	386.832	195.771
1021	ENSG00000134371	CDC73	442.544	0.607522	0.405917	1.49666	0.134481	0.412759	312.102	360.343	688.236	590.016	262.021
1022	ENSG00000136149	RPL13AP25	344.224	0.523866	0.350039	1.49659	0.134499	0.412759	340.564	205.303	413.996	371.202	390.054
1023	ENSG00000159140	SON	1334.9	0.484111	0.323491	1.49652	0.134518	0.412759	1127.69	1025.81	1826.07	1704.93	990.022
1024	ENSG00000166147	FBN1	2222.87	0.509533	0.340706	1.49552	0.134778	0.412759	1731.28	1812.33	3131.34	2972.22	1467.17
1025	ENSG00000099901	RANBP1	640.157	0.480291	0.321617	1.49336	0.135342	0.413775	535.873	498.392	818.763	824.46	523.297
1026	ENSG00000116962	NID1	111.357	-0.782522	0.524222	-1.49273	0.135508	0.413775	151.144	147.252	85.6999	41.6788	131.01
1027	ENSG00000173473	SMARCC1	425.14	-0.541193	0.362504	-1.49293	0.135455	0.413775	525.077	523.17	265.01	304.777	507.666
1028	ENSG00000205659	LIN52	70.8614	0.833738	0.558718	1.49223	0.135638	0.413775	55.9428	40.3527	101.521	102.895	53.5952
1029	ENSG00000163001	CFAP36	69.0091	-0.778445	0.522088	-1.49102	0.135955	0.41434	80.4791	103.36	51.4199	59.9133	49.8733
1030	ENSG00000138433	CIR1	132.018	-0.631855	0.426052	-1.48304	0.138063	0.420354	191.383	144.42	88.3368	119.827	116.123
1031	ENSG00000177700	POLR2L	1013.95	0.425713	0.287395	1.48128	0.138532	0.420965	777.311	903.335	1191.89	1255.58	941.638
1032	ENSG00000214046	SMIM7	71.5511	-0.754358	0.509193	-1.48148	0.138479	0.420965	97.1638	92.0326	59.3307	58.6109	50.6177
1033	ENSG00000158417	EIF5B	1379.73	-0.39141	0.264395	-1.4804	0.138766	0.421269	1560.51	1658	1252.54	1138.35	1289.26
1034	ENSG00000132688	NES	114.445	-0.643514	0.43523	-1.47856	0.139258	0.422352	158.014	133.801	106.795	87.2651	86.3478
1035	ENSG00000148634	HERC4	105.559	-0.66291	0.449012	-1.47637	0.139844	0.42372	130.533	140.881	73.8337	82.0552	100.491
1036	ENSG00000067900	ROCK1	614.267	-0.483812	0.328047	-1.47483	0.140259	0.423781	677.202	805.639	516.836	397.251	674.406
1037	ENSG00000101412	E2F1	160.55	0.737406	0.500322	1.47386	0.140519	0.423781	127.589	101.236	267.647	221.419	84.859
1038	ENSG00000116005	PCYOX1	301.071	-0.505482	0.343182	-1.47293	0.14077	0.423781	383.748	347.6	255.781	306.079	212.148
1039	ENSG00000118412	CASP8AP2	64.8755	0.946852	0.642901	1.47278	0.14081	0.423781	54.9614	28.3177	118.661	85.9626	36.4745
1040	ENSG00000132153	DHX30	77.4135	0.770706	0.523068	1.47343	0.140634	0.423781	51.0355	57.3434	118.661	93.7774	66.2496
1041	ENSG00000145050	MANF	71.3426	-0.806773	0.547013	-1.47487	0.140247	0.423781	88.3308	104.068	61.9676	33.8641	68.4827
1042	ENSG00000177600	RPLP2	1503.87	0.410469	0.278385	1.47447	0.140356	0.423781	1283.74	1227.57	1567.65	1983.65	1456.75
1043	ENSG00000197170	PSMD12	83.459	-0.8161	0.554463	-1.47187	0.141055	0.423875	105.997	119.642	30.3246	84.6601	76.6709
1044	ENSG00000213885	RPL13AP7	84.3623	0.999613	0.67924	1.47167	0.141111	0.423875	81.4606	24.0701	150.304	130.246	35.7301
1045	ENSG00000060749	QSER1	165.867	0.576522	0.392003	1.47071	0.14137	0.42409	109.923	145.836	206.998	190.16	176.417
1046	ENSG00000080345	RIF1	235.904	-0.523398	0.355956	-1.4704	0.141453	0.42409	271.862	305.123	232.049	173.228	197.26
1047	ENSG00000217128	FNIP1	70.3785	0.87267	0.593811	1.46961	0.141668	0.424326	47.1097	46.7242	135.801	45.5862	76.6709
1048	ENSG00000085982	USP40	84.1316	-0.736491	0.501856	-1.46753	0.142231	0.425608	120.719	100.528	87.0183	52.0986	60.2946
1049	ENSG00000161547	SRSF2	336.054	0.65022	0.443631	1.46568	0.142736	0.426306	237.512	262.647	341.481	636.905	201.726
1050	ENSG00000186432	KPNA4	322.738	0.530244	0.361702	1.46597	0.142656	0.426306	248.308	261.939	367.85	264.4	471.191
1051	ENSG00000107021	TBC1D13	91.5345	0.72788	0.496884	1.46489	0.142951	0.42654	77.5348	53.8037	104.158	138.061	84.1147
1052	ENSG00000048405	ZNF800	123.861	0.714166	0.487882	1.46381	0.143246	0.426922	75.5719	102.652	160.852	195.37	84.859
1053	ENSG00000118007	STAG1	101.109	-0.73728	0.503883	-1.4632	0.143413	0.426922	108.941	157.163	104.158	48.1912	87.0922
1054	ENSG00000150687	PRSS23	146.07	0.612081	0.418395	1.46293	0.143487	0.426922	108.941	113.271	134.483	161.506	212.148
1055	ENSG00000130749	ZC3H4	124.263	-0.630515	0.431829	-1.46011	0.144261	0.427987	181.569	133.801	110.751	108.104	87.0922
1056	ENSG00000143013	LMO4	484.72	0.609801	0.417777	1.45963	0.144391	0.427987	305.232	430.429	667.14	747.614	273.187
1057	ENSG00000160014	CALM3	234.196	0.614068	0.420474	1.46042	0.144175	0.427987	143.292	210.967	341.481	309.986	165.252
1058	ENSG00000196227	FAM217B	82.9342	-0.796785	0.545559	-1.46049	0.144155	0.427987	128.57	93.4485	97.566	53.401	41.6851
1059	ENSG00000133858	ZFC3H1	193.181	-0.564306	0.38715	-1.45759	0.144953	0.429248	271.862	208.135	127.891	182.345	175.673
1060	ENSG00000113328	CCNG1	180.902	0.731504	0.502455	1.45586	0.145432	0.42954	140.348	118.226	313.793	243.561	88.5809
1061	ENSG00000131508	UBE2D2	131.641	0.649977	0.44673	1.45497	0.145678	0.42954	109.923	86.369	205.68	118.524	137.71
1062	ENSG00000134313	KIDINS220	88.5324	-0.691944	0.475649	-1.45474	0.145742	0.42954	117.774	111.855	59.3307	80.7528	72.949
1063	ENSG00000144713	RPL32	1097.58	-0.606769	0.416944	-1.45527	0.145593	0.42954	1593.88	1173.06	603.854	556.152	1560.96
1064	ENSG00000145817	YIPF5	305.456	-0.558248	0.383871	-1.45426	0.145874	0.42954	400.433	356.803	158.215	312.591	299.24
1065	ENSG00000197535	MYO5A	315.367	0.492209	0.337903	1.45665	0.145212	0.42954	212.975	293.796	332.252	358.178	379.633
1066	ENSG00000169118	CSNK1G1	90.2103	0.718013	0.494855	1.45096	0.146792	0.431838	58.8872	70.7943	139.757	98.9872	82.6259
1067	ENSG00000141002	TCF25	517.567	-0.433638	0.299293	-1.44887	0.147373	0.432466	587.89	637.857	507.607	421.998	432.483
1068	ENSG00000160113	NR2F6	83.1253	0.819725	0.565832	1.44871	0.147419	0.432466	35.3323	78.5817	83.0629	74.2404	144.409
1069	ENSG00000177954	RPS27	879.893	0.491123	0.338909	1.44913	0.147302	0.432466	587.89	826.169	1277.59	1018.53	689.294
1070	ENSG00000106624	AEBP1	120.863	-0.649221	0.448565	-1.44733	0.147805	0.432868	148.199	161.411	88.3368	76.8454	129.522
1071	ENSG00000178980	SELENOW	300.012	0.483063	0.333784	1.44723	0.147832	0.432868	221.808	262.647	337.526	307.381	370.7
1072	ENSG00000174891	RSRC1	419.283	0.533022	0.368806	1.44526	0.148384	0.433633	353.323	307.247	515.518	617.368	302.962
1073	ENSG00000181852	RNF41	100.845	-0.726907	0.503076	-1.44493	0.148479	0.433633	139.366	124.598	64.6045	119.827	55.8283
1074	ENSG00000220205	VAMP2	81.9153	1.01241	0.700713	1.44482	0.148508	0.433633	65.7573	36.1051	26.3692	197.974	83.3703
1075	ENSG00000226242	RPS17P8	515.175	0.592682	0.410593	1.44348	0.148885	0.43433	293.454	494.852	704.057	767.151	316.36
1076	ENSG00000124155	PIGT	213.715	-0.652106	0.452263	-1.44187	0.149339	0.435248	232.604	315.035	176.674	91.1725	253.088
1077	ENSG00000185298	CCDC137	73.8717	-0.899228	0.624315	-1.44034	0.14977	0.4361	106.978	98.4041	64.6045	18.2345	81.1372
1078	ENSG00000122557	HERPUD2	68.3812	-0.840696	0.584041	-1.43945	0.150024	0.436433	98.1453	87.7849	80.426	28.6542	46.8958
1079	ENSG00000110429	FBXO3	74.8479	0.911145	0.633389	1.43852	0.150285	0.436789	66.7388	31.1495	141.075	95.0799	40.1964
1080	ENSG00000148498	PARD3	185.07	0.60382	0.420213	1.43694	0.150735	0.437691	133.478	147.96	238.641	268.308	136.965
1081	ENSG00000102038	SMARCA1	69.7971	-0.877752	0.611524	-1.43535	0.151187	0.437787	69.6832	122.474	73.8337	23.4443	59.5502
1082	ENSG00000117906	RCN2	71.6839	-0.880948	0.613714	-1.43544	0.151163	0.437787	68.7017	128.846	23.7323	76.8454	60.2946
1083	ENSG00000150753	CCT5	87.7349	-0.930461	0.647916	-1.43608	0.150979	0.437787	119.737	126.722	60.6491	16.932	114.634
1084	ENSG00000112701	SENP6	70.2059	-0.880767	0.614729	-1.43277	0.151923	0.439512	101.09	93.4485	30.3246	33.8641	92.3028
1085	ENSG00000080503	SMARCA2	762.423	0.496645	0.346812	1.43203	0.152135	0.439719	600.649	621.574	1131.24	913.027	545.629
1086	ENSG00000220771	BOLA2P3	127.121	0.774638	0.541581	1.43033	0.152623	0.440724	75.5719	101.944	243.915	147.178	66.994
1087	ENSG00000240463	RPS19P3	2338.88	0.51853	0.362914	1.4288	0.153063	0.441586	1677.3	2035.34	3591.48	2967.01	1423.25
1088	ENSG00000172667	ZMAT3	315.081	0.57863	0.405769	1.42601	0.153866	0.443496	222.79	262.647	303.246	547.035	239.69
1089	ENSG00000139218	SCAF11	322.338	-0.467863	0.32825	-1.42533	0.154063	0.443656	401.414	372.378	275.558	247.468	314.872
1090	ENSG00000079819	EPB41L2	188.135	-0.577589	0.405532	-1.42427	0.154367	0.444125	241.437	228.666	151.623	112.012	206.937
1091	ENSG00000230175	0	605.453	1.2349	0.868643	1.42165	0.155129	0.445907	395.525	272.558	921.603	1221.71	215.87
1092	ENSG00000215301	DDX3X	364.587	0.522155	0.367834	1.41954	0.155742	0.44726	295.417	281.761	506.288	471.492	267.976
1093	ENSG00000048828	FAM120A	329.298	0.515755	0.363685	1.41814	0.156151	0.448022	201.198	321.406	367.85	449.35	306.684
1094	ENSG00000135404	CD63	1115.88	0.417208	0.294698	1.41571	0.15686	0.449647	877.419	981.209	1041.58	1148.77	1530.44
1095	ENSG00000137073	UBAP2	111.332	-0.620092	0.438723	-1.4134	0.157538	0.449944	143.292	138.049	101.521	96.3823	77.4153
1096	ENSG00000178741	COX5A	164.126	0.545249	0.385725	1.41357	0.157488	0.449944	130.533	126.722	209.635	175.833	177.906
1097	ENSG00000198663	C6orf89	220.659	-0.576674	0.407691	-1.41449	0.157219	0.449944	273.825	276.098	121.298	257.888	174.184
1098	ENSG00000204138	PHACTR4	214.357	-0.569315	0.402593	-1.41412	0.157327	0.449944	213.957	317.866	197.769	214.907	127.289
1099	ENSG00000170088	TMEM192	88.7313	-0.786994	0.557447	-1.41178	0.158014	0.450483	136.422	101.236	31.643	97.6848	76.6709
1100	ENSG00000183431	SF3A3	97.5486	-0.640395	0.453564	-1.41192	0.157974	0.450483	126.607	121.766	83.0629	83.3577	72.949
1101	ENSG00000100664	EIF5	337.975	0.452965	0.321292	1.40982	0.158591	0.451719	255.178	298.044	361.258	397.251	378.144
1102	ENSG00000171241	SHCBP1	121.272	-0.687178	0.488191	-1.4076	0.159249	0.45318	149.181	164.243	65.923	151.086	75.9265
1103	ENSG00000204381	LAYN	111.434	-0.7093	0.504085	-1.4071	0.159397	0.45319	158.995	132.385	97.566	46.8887	121.334
1104	ENSG00000164692	COL1A2	1545.96	-0.374862	0.267044	-1.40375	0.160394	0.454935	1653.75	1929.85	1493.81	1289.44	1362.96
1105	ENSG00000177606	JUN	436.769	0.483319	0.344294	1.4038	0.160379	0.454935	320.935	383.705	391.582	649.929	437.694
1106	ENSG00000196655	TRAPPC4	69.5016	0.745477	0.531128	1.40357	0.160446	0.454935	49.0726	49.556	100.203	84.6601	64.0165
1107	ENSG00000125835	SNRPB	112.5	0.706786	0.504063	1.40218	0.160862	0.455704	53.9799	109.023	137.12	91.1725	171.207
1108	ENSG00000005073	HOXA11	130.996	-0.672959	0.480835	-1.39956	0.161644	0.45586	165.866	170.614	148.986	110.709	58.8058
1109	ENSG00000044090	CUL7	84.8098	0.806026	0.575877	1.39965	0.161618	0.45586	47.1097	69.3784	167.444	82.0552	58.0615
1110	ENSG00000105926	PALS2	75.981	0.760326	0.542832	1.40067	0.161314	0.45586	61.8315	45.3083	121.298	91.1725	60.2946
1111	ENSG00000163655	GMPS	101.134	-0.743707	0.530674	-1.40144	0.161083	0.45586	160.958	106.899	46.1461	70.333	121.334
1112	ENSG00000168653	NDUFS5	220.711	-0.63205	0.45146	-1.40001	0.161509	0.45586	166.847	394.324	150.304	147.178	244.9
1113	ENSG00000175048	ZDHHC14	123.739	0.761234	0.544185	1.39885	0.161858	0.456052	102.071	72.2102	205.68	178.438	60.2946
1114	ENSG00000086061	DNAJA1	148.42	0.591997	0.424256	1.39538	0.162903	0.458583	103.053	123.89	208.317	181.042	125.8
1115	ENSG00000143947	RPS27A	1388.07	0.577466	0.413986	1.39489	0.163049	0.458583	795.958	1347.92	1042.9	1074.53	2679.01
1116	ENSG00000167460	TPM4	3058.37	0.363735	0.261033	1.39345	0.163484	0.459397	2429.1	2790	3180.12	3140.24	3752.41
1117	ENSG00000162734	PEA15	1971.12	0.382998	0.275233	1.39154	0.164061	0.460192	1770.54	1563.14	2102.94	2547.62	1871.37
1118	ENSG00000198000	NOL8	103.346	-0.628682	0.451707	-1.39179	0.163986	0.460192	147.218	115.395	87.0183	75.5429	91.5584
1119	ENSG00000140367	UBE2Q2	92.9537	-1.03	0.742724	-1.38679	0.165506	0.46383	185.495	83.5373	59.3307	9.11725	127.289
1120	ENSG00000071626	DAZAP1	254.878	0.577838	0.417185	1.38509	0.166026	0.464873	195.309	197.516	257.1	437.628	186.839
1121	ENSG00000111186	WNT5B	293.432	0.488177	0.352726	1.38401	0.166355	0.465378	249.289	223.002	408.722	320.406	265.743
1122	ENSG00000075856	SART3	66.1346	-1.06231	0.768803	-1.38177	0.167043	0.465803	104.034	88.4929	83.0629	5.20986	49.8733
1123	ENSG00000119326	CTNNAL1	129.121	-0.606093	0.438517	-1.38214	0.166928	0.465803	138.385	186.189	96.2475	135.456	89.3253
1124	ENSG00000120738	EGR1	201.663	0.538306	0.389582	1.38175	0.167047	0.465803	194.328	123.182	222.82	261.795	206.193
1125	ENSG00000260032	NORAD	129.992	-0.632313	0.457674	-1.38158	0.167101	0.465803	118.756	210.967	92.2922	134.154	93.7916
1126	ENSG00000178982	EIF3K	958.497	0.529359	0.383306	1.38104	0.167268	0.465855	617.334	895.548	1173.43	1512.16	594.013
1127	ENSG00000102804	TSC22D1	113.766	0.77581	0.56293	1.37816	0.168152	0.466338	106.978	52.3878	116.024	222.721	70.7159
1128	ENSG00000112118	MCM3	139.185	-0.569455	0.412942	-1.37902	0.167889	0.466338	173.717	172.738	123.935	93.7774	131.755
1129	ENSG00000118705	RPN2	432.093	-0.439272	0.318761	-1.37806	0.168185	0.466338	444.598	581.221	333.57	389.437	411.641
1130	ENSG00000136861	CDK5RAP2	119.913	-0.699246	0.507102	-1.37891	0.167924	0.466338	158.014	153.624	143.712	48.1912	96.0247
1131	ENSG00000179218	CALR	792.77	0.427063	0.30952	1.37976	0.16766	0.466338	801.847	512.551	945.335	893.49	810.627
1132	ENSG00000065135	GNAI3	113.989	0.67619	0.491154	1.37674	0.168593	0.467058	59.8686	107.607	90.9737	169.32	142.176
1133	ENSG00000180104	EXOC3	131.027	0.627435	0.45613	1.37556	0.168957	0.467653	116.793	80.7055	129.209	207.092	121.334
1134	ENSG00000100364	KIAA0930	87.0445	-0.765932	0.557173	-1.37468	0.169232	0.468	99.1267	132.385	88.3368	31.2591	84.1147
1135	ENSG00000065809	FAM107B	112.752	0.672796	0.489743	1.37377	0.169513	0.468305	77.5348	89.2008	101.521	98.9872	196.516
1136	ENSG00000148337	CIZ1	237.386	0.601859	0.438239	1.37336	0.169641	0.468305	211.012	150.792	359.939	317.801	147.387
1137	ENSG00000135930	EIF4E2	509.837	0.466812	0.340068	1.3727	0.169845	0.468455	381.785	446.712	603.854	711.145	405.686
1138	ENSG00000130635	COL5A1	487.331	0.511621	0.373935	1.36821	0.171247	0.471492	405.34	370.254	582.759	746.312	331.992
1139	ENSG00000145375	SPATA5	69.1415	-0.730989	0.53417	-1.36846	0.171169	0.471492	85.3864	96.2802	39.5538	66.4257	58.0615
1140	ENSG00000128908	INO80	95.0709	-0.633189	0.463348	-1.36655	0.171766	0.472507	132.496	109.023	87.0183	76.8454	69.9715
1141	ENSG00000055483	USP36	162.493	-0.636059	0.465866	-1.36532	0.172151	0.472774	202.179	211.675	171.4	66.4257	160.786
1142	ENSG00000133687	TMTC1	93.1035	-0.702559	0.514589	-1.36528	0.172164	0.472774	146.236	96.9882	55.3753	61.2158	105.702
1143	ENSG00000105270	CLIP3	144.314	0.575241	0.421846	1.36363	0.172685	0.472961	121.7	101.236	210.953	148.481	139.199
1144	ENSG00000159346	ADIPOR1	85.0365	0.802732	0.588503	1.36402	0.17256	0.472961	81.4606	36.1051	110.751	143.271	53.5952
1145	ENSG00000168615	ADAM9	145.043	0.58326	0.427717	1.36366	0.172675	0.472961	116.793	106.191	216.227	160.203	125.8
1146	ENSG00000060237	WNK1	465.245	0.444935	0.326449	1.36295	0.172897	0.47313	394.544	369.546	586.714	580.899	394.52
1147	ENSG00000103994	ZNF106	369.328	-0.432785	0.317721	-1.36216	0.173149	0.473404	461.283	413.439	295.335	359.48	317.105
1148	ENSG00000135506	OS9	70.785	-0.872713	0.641964	-1.35944	0.174007	0.475335	114.83	80.7055	48.783	19.537	90.0697
1149	ENSG00000174099	MSRB3	319.305	-0.48843	0.359435	-1.35888	0.174184	0.475405	438.709	334.149	221.501	250.073	352.091
1150	ENSG00000240652	0	120.807	0.598036	0.440827	1.35662	0.174902	0.476949	75.5719	109.023	139.757	121.129	158.552
1151	ENSG00000005810	MYCBP2	148.067	-0.541388	0.399643	-1.35468	0.17552	0.47739	203.161	161.411	129.209	128.944	117.612
1152	ENSG00000075618	FSCN1	195.143	-0.639624	0.472004	-1.35513	0.175378	0.47739	277.751	220.878	89.6552	127.641	259.788
1153	ENSG00000100219	XBP1	68.821	0.734758	0.542082	1.35544	0.175279	0.47739	47.1097	50.9719	94.9291	93.7774	57.3171
1154	ENSG00000133026	MYH10	194.558	-0.680046	0.502412	-1.35356	0.175876	0.477535	260.085	242.824	217.546	57.3084	195.027
1155	ENSG00000264316	MTCO3P13	925.888	1.09849	0.811561	1.35356	0.175878	0.477535	546.669	552.196	1526.78	1660.64	343.158
1156	ENSG00000155827	RNF20	101.062	-0.64981	0.48061	-1.35205	0.176358	0.478425	94.2195	163.535	83.0629	93.7774	70.7159
1157	ENSG00000135956	TMEM127	109.575	-0.683074	0.506342	-1.34904	0.177325	0.480217	111.886	172.03	54.0568	83.3577	126.544
1158	ENSG00000198898	CAPZA2	76.091	0.751848	0.557245	1.34922	0.177266	0.480217	72.6275	35.3971	93.6106	113.314	65.5052
1159	ENSG00000141456	PELP1	132.917	-0.623543	0.463055	-1.34659	0.178114	0.481936	187.457	148.668	156.897	96.3823	75.1821
1160	ENSG00000087086	FTL	3169.76	-0.393705	0.293306	-1.3423	0.179499	0.482768	3224.07	4176.86	2461.56	2419.98	3566.31
1161	ENSG00000125901	MRPS26	99.4689	0.671316	0.499138	1.34495	0.178642	0.482768	92.2566	54.5116	123.935	143.271	83.3703
1162	ENSG00000132589	FLOT2	307.94	0.540613	0.402535	1.34302	0.179266	0.482768	182.55	300.168	452.232	377.715	227.035
1163	ENSG00000141905	NFIC	718.246	-0.391346	0.291483	-1.3426	0.1794	0.482768	899.992	775.905	679.007	552.245	684.083
1164	ENSG00000166452	AKIP1	167.756	0.61747	0.459505	1.34377	0.179022	0.482768	129.552	123.89	257.1	224.024	104.213
1165	ENSG00000197301	HMGA2-AS1	261.067	0.457877	0.341093	1.34238	0.179472	0.482768	206.105	220.17	279.513	325.616	273.931
1166	ENSG00000198265	HELZ	90.7162	-0.683328	0.508231	-1.34452	0.178779	0.482768	128.57	105.484	104.158	62.5183	52.8508
1167	ENSG00000077097	TOP2B	313.488	0.486117	0.362832	1.33979	0.180314	0.482999	262.048	242.824	452.232	354.27	256.066
1168	ENSG00000105948	TTC26	83.5684	0.716459	0.534715	1.33989	0.180281	0.482999	64.7759	55.9275	59.3307	138.061	99.7466
1169	ENSG00000123352	SPATS2	78.2751	-0.743862	0.55526	-1.33966	0.180355	0.482999	98.1453	108.315	88.3368	32.5616	64.0165
1170	ENSG00000134697	GNL2	120.103	-0.665865	0.497007	-1.33975	0.180327	0.482999	138.385	171.322	73.8337	65.1232	151.853
1171	ENSG00000187498	COL4A1	157.429	-0.563909	0.420816	-1.34004	0.180234	0.482999	198.253	193.268	93.6106	131.549	170.462
1172	ENSG00000100243	CYB5R3	483.041	-0.407718	0.304526	-1.33886	0.180615	0.483212	548.632	584.761	378.398	480.609	422.806
1173	ENSG00000170855	TRIAP1	136.283	0.571275	0.426811	1.33847	0.180742	0.483212	87.3493	123.182	147.667	186.252	136.965
1174	ENSG00000115963	RND3	1492.61	-0.383619	0.286915	-1.33705	0.181207	0.484042	1528.12	1944.01	1296.05	1133.14	1561.7
1175	ENSG00000106609	TMEM248	103.201	0.624059	0.466971	1.3364	0.18142	0.484198	61.8315	93.4485	131.846	127.641	101.235
1176	ENSG00000090316	MAEA	97.3248	0.657004	0.492557	1.33387	0.182248	0.485995	64.7759	79.2896	122.617	143.271	76.6709
1177	ENSG00000125818	PSMF1	89.4743	0.641601	0.481222	1.33327	0.182442	0.486098	68.7017	65.1308	92.2922	128.944	92.3028
1178	ENSG00000176142	TMEM39A	87.7191	0.772617	0.580341	1.33131	0.183086	0.487399	48.0912	74.334	141.075	128.944	46.1514
1179	ENSG00000117691	NENF	84.5518	-0.739429	0.5561	-1.32967	0.183627	0.488196	67.7202	155.04	73.8337	44.2838	81.8815
1180	ENSG00000165416	SUGT1	191.668	0.503526	0.37899	1.3286	0.183981	0.488196	143.292	162.827	201.724	259.19	191.305
1181	ENSG00000196230	TUBB	1283.03	0.349165	0.262823	1.32852	0.184007	0.488196	1098.25	1105.81	1351.42	1427.5	1432.18
1182	ENSG00000214753	HNRNPUL2	265.472	0.537455	0.404473	1.32878	0.183921	0.488196	158.995	257.691	386.309	320.406	203.959
1183	ENSG00000126777	KTN1	1470.81	0.366663	0.276215	1.32746	0.184358	0.488712	1293.55	1212.71	1454.26	1900.29	1493.22
1184	ENSG00000275066	SYNRG	192.392	0.5492	0.414351	1.32544	0.185024	0.490063	146.236	154.332	191.177	308.684	161.53
1185	ENSG00000120688	WBP4	74.5778	-0.708477	0.53486	-1.3246	0.185302	0.490387	98.1453	96.9882	50.1015	44.2838	83.3703
1186	ENSG00000100354	TNRC6B	433.964	0.525139	0.396833	1.32333	0.185727	0.490682	369.026	317.158	651.319	566.572	265.743
1187	ENSG00000147027	TMEM47	135.326	-0.557139	0.420913	-1.32364	0.185621	0.490682	156.051	178.402	137.12	112.012	93.0472
1188	ENSG00000164611	PTTG1	78.5721	0.684982	0.518439	1.32124	0.186422	0.492103	43.1839	71.5022	106.795	92.4749	78.904
1189	ENSG00000018189	RUFY3	66.5366	-0.710395	0.538063	-1.32028	0.186741	0.492531	96.1824	77.1658	65.923	49.4936	43.9183
1190	ENSG00000196535	MYO18A	240.523	-0.494057	0.375096	-1.31715	0.187789	0.494879	342.527	240.701	163.489	216.209	239.69
1191	ENSG00000236913	RPS13P3	511.926	0.548504	0.416613	1.31658	0.187981	0.494968	367.063	433.261	690.873	794.503	273.931
1192	ENSG00000116871	MAP7D1	195.714	-0.480715	0.365391	-1.31562	0.188303	0.494985	232.604	239.285	152.941	170.623	183.117
1193	ENSG00000163466	ARPC2	1941.62	-0.341309	0.259376	-1.31588	0.188213	0.494985	2393.76	2051.62	1757.51	1759.63	1745.57
1194	ENSG00000164944	VIRMA	138.176	-0.56939	0.432991	-1.31502	0.188505	0.495101	165.866	176.986	113.388	149.783	84.859
1195	ENSG00000170242	USP47	106.661	0.670369	0.5106	1.3129	0.189216	0.496552	62.813	94.8644	117.343	78.1478	180.139
1196	ENSG00000119707	RBM25	1110.76	-0.359816	0.274476	-1.31092	0.189884	0.497744	1349.5	1211.29	905.782	1103.19	984.067
1197	ENSG00000154188	ANGPT1	68.8431	-0.737668	0.563042	-1.31015	0.190146	0.497744	115.811	65.1308	68.5599	56.0059	38.7076
1198	ENSG00000286259	0	71.0766	0.720498	0.549863	1.31032	0.190087	0.497744	51.0355	50.9719	102.84	97.6848	52.8508
1199	ENSG00000145431	PDGFC	157.092	0.568387	0.434289	1.30878	0.190611	0.498544	107.96	135.217	250.507	135.456	156.319
1200	ENSG00000131871	SELENOS	150.649	-0.607827	0.464805	-1.3077	0.190975	0.49908	166.847	213.799	97.566	85.9626	189.072
1201	ENSG00000109917	ZPR1	85.1687	0.666883	0.5106	1.30608	0.191526	0.499874	71.6461	54.5116	69.8783	126.339	103.468
1202	ENSG00000267519	MIR23AHG	71.7283	-0.822527	0.62987	-1.30587	0.191597	0.499874	82.442	111.855	18.4584	78.1478	67.7384
1203	ENSG00000111961	SASH1	86.2154	0.639892	0.490596	1.30431	0.192126	0.500157	59.8686	69.3784	77.7891	109.407	114.634
1204	ENSG00000163902	RPN1	71.1481	-0.800782	0.613931	-1.30435	0.192113	0.500157	120.719	70.0864	36.9169	93.7774	34.2414
1205	ENSG00000169604	ANTXR1	113.086	-0.641166	0.491637	-1.30415	0.192184	0.500157	154.088	135.217	75.1522	62.5183	138.454
1206	ENSG00000047849	MAP4	371.135	0.406815	0.312571	1.30151	0.193084	0.502006	294.436	326.362	420.589	395.949	418.34
1207	ENSG00000171858	RPS21	704.875	0.422822	0.324966	1.30113	0.193215	0.502006	548.632	620.866	838.54	957.311	559.028
1208	ENSG00000125834	STK35	88.5952	0.665037	0.511355	1.30054	0.193416	0.502113	59.8686	70.7943	98.8844	141.969	71.4602
1209	ENSG00000041982	TNC	65.8637	0.82242	0.633081	1.29907	0.193918	0.502585	45.1468	44.6004	100.203	108.104	31.2639
1210	ENSG00000090238	YPEL3	96.0039	0.741326	0.570655	1.29908	0.193917	0.502585	75.5719	60.8831	129.209	166.715	47.6402
1211	ENSG00000148180	GSN	85.2641	-0.697804	0.537472	-1.29831	0.194182	0.502853	85.3864	135.925	42.1907	95.0799	67.7384
1212	ENSG00000186591	UBE2H	91.1341	0.743584	0.57346	1.29666	0.194747	0.503901	42.2025	87.077	170.081	62.5183	93.7916
1213	ENSG00000072849	DERL2	84.0519	0.648794	0.500875	1.29532	0.195209	0.504263	62.813	62.299	94.9291	125.037	75.1821
1214	ENSG00000131504	DIAPH1	231.671	0.517869	0.399717	1.29559	0.195116	0.504263	182.55	184.773	355.984	257.888	177.162
1215	ENSG00000272391	POM121C	76.2194	-0.707631	0.54708	-1.29347	0.195849	0.505501	104.034	94.8644	79.1076	33.8641	69.2271
1216	ENSG00000112159	MDN1	119.117	-0.610466	0.472434	-1.29217	0.196297	0.505729	174.699	126.722	89.6552	69.0306	135.477
1217	ENSG00000136824	SMC2	165.685	-0.646955	0.500517	-1.29257	0.196158	0.505729	167.828	256.275	119.98	67.7281	216.614
1218	ENSG00000169976	SF3B5	453.557	0.406061	0.314334	1.29181	0.196422	0.505729	321.917	436.801	474.645	511.868	522.553
1219	ENSG00000118971	CCND2	147.284	0.592769	0.459359	1.29043	0.196903	0.506138	91.2751	133.801	246.552	136.759	128.033
1220	ENSG00000126524	SBDS	154.614	0.562299	0.435606	1.29084	0.196758	0.506138	120.719	120.35	122.617	166.715	242.667
1221	ENSG00000134453	RBM17	314.571	-0.48739	0.378088	-1.28909	0.197367	0.506915	405.34	354.679	357.302	177.135	278.397
1222	ENSG00000138430	OLA1	256.74	0.522426	0.405576	1.28811	0.197707	0.50699	173.717	232.205	374.442	321.709	181.628
1223	ENSG00000145901	TNIP1	97.4418	0.669526	0.519818	1.288	0.197745	0.50699	76.5533	67.9625	71.1968	100.29	171.207
1224	ENSG00000253833	DSTNP3	65.3738	0.683358	0.530717	1.28761	0.197881	0.50699	44.1654	51.6798	69.8783	80.7528	80.3928
1225	ENSG00000126934	MAP2K2	151.748	0.547408	0.425551	1.28635	0.19832	0.50759	144.274	94.1564	141.075	169.32	209.914
1226	ENSG00000129255	MPDU1	150.501	0.657383	0.511416	1.28542	0.198647	0.50759	146.236	77.1658	192.495	248.771	87.8366
1227	ENSG00000198087	CD2AP	68.485	-0.756023	0.588133	-1.28546	0.198631	0.50759	79.4977	102.652	35.5984	39.0739	85.6034
1228	ENSG00000214078	CPNE1	108.636	-0.734817	0.571805	-1.28508	0.198763	0.50759	147.218	138.757	126.572	28.6542	101.98
1229	ENSG00000075945	KIFAP3	77.0511	0.686688	0.535073	1.28335	0.199369	0.508722	70.6646	42.4766	67.2414	113.314	91.5584
1230	ENSG00000119705	SLIRP	152.847	-0.586612	0.457891	-1.28112	0.200153	0.509894	200.216	183.357	87.0183	101.592	192.049
1231	ENSG00000147955	SIGMAR1	130.969	0.54443	0.424854	1.28145	0.200035	0.509894	91.2751	113.979	125.254	173.228	151.109
1232	ENSG00000145220	LYAR	157.916	-0.505983	0.395491	-1.27938	0.200764	0.511036	164.884	218.754	131.846	144.573	129.522
1233	ENSG00000005302	MSL3	71.0638	-0.747358	0.585431	-1.27659	0.201745	0.513087	76.5533	111.147	27.6876	78.1478	61.7833
1234	ENSG00000138600	SPPL2A	128.888	-1.56309	1.22483	-1.27617	0.201897	0.513087	203.161	224.418	6.5923	117.222	93.0472
1235	ENSG00000176102	CSTF3	92.0624	0.997861	0.782466	1.27528	0.202211	0.51347	49.0726	65.8387	19.7769	273.517	52.1064
1236	ENSG00000168385	SEPTIN2	129.066	0.537329	0.421556	1.27463	0.202439	0.513632	95.2009	107.607	141.075	171.925	129.522
1237	ENSG00000137776	SLTM	231.641	-0.504051	0.395979	-1.27292	0.203045	0.514752	239.474	324.238	166.126	158.901	269.465
1238	ENSG00000100650	SRSF5	216.529	0.503887	0.39613	1.27202	0.203365	0.515147	175.68	169.906	278.195	294.357	164.507
1239	ENSG00000074356	NCBP3	76.2321	0.652013	0.512776	1.27154	0.203538	0.51517	57.9057	55.9275	71.1968	85.9626	110.168
1240	ENSG00000078674	PCM1	251.957	-0.479678	0.377512	-1.27063	0.203861	0.51557	321.917	286.009	155.578	220.116	276.164
1241	ENSG00000134318	ROCK2	522.296	-0.383149	0.30196	-1.26887	0.204487	0.516737	573.168	640.688	461.461	522.288	413.874
1242	ENSG00000077549	CAPZB	218.973	-0.477006	0.376338	-1.26749	0.204979	0.517565	237.512	289.549	145.031	218.814	203.959
1243	ENSG00000112769	LAMA4	210.413	-0.543572	0.429254	-1.26632	0.205399	0.518206	229.66	289.549	101.521	195.37	235.968
1244	ENSG00000064651	SLC12A2	74.7168	-0.659865	0.522438	-1.26305	0.206571	0.518246	84.4049	107.607	58.0122	46.8887	76.6709
1245	ENSG00000128228	SDF2L1	127.423	0.592807	0.468556	1.26518	0.205807	0.518246	63.7944	130.969	172.718	123.734	145.898
1246	ENSG00000137818	RPLP1	1559.03	-0.382245	0.302539	-1.26346	0.206425	0.518246	1470.22	2154.27	1419.98	1127.93	1622.74
1247	ENSG00000148248	SURF4	437.991	0.42193	0.333885	1.2637	0.206338	0.518246	352.342	374.502	507.607	590.016	365.489
1248	ENSG00000151304	SRFBP1	79.1428	-0.917844	0.72567	-1.26482	0.205935	0.518246	91.2751	129.554	89.6552	7.81478	77.4153
1249	ENSG00000169189	NSMCE1	80.1555	-0.638521	0.504732	-1.26507	0.205846	0.518246	78.5162	125.306	68.5599	65.1232	63.2721
1250	ENSG00000196586	MYO6	370.721	-0.42202	0.333845	-1.26412	0.206186	0.518246	458.338	415.563	400.812	308.684	270.209
1251	ENSG00000154447	SH3RF1	102.012	0.569536	0.451089	1.26258	0.20674	0.518256	77.5348	80.7055	118.661	102.895	130.266
1252	ENSG00000147400	CETN2	89.1924	-0.612177	0.48515	-1.26183	0.20701	0.518516	107.96	117.519	75.1522	56.0059	89.3253
1253	ENSG00000100280	AP1B1	240.34	0.579223	0.460297	1.25837	0.208258	0.519196	163.903	206.011	249.189	438.93	143.665
1254	ENSG00000138760	SCARB2	76.6997	-0.639597	0.507946	-1.25918	0.207964	0.519196	87.3493	108.315	52.7384	59.9133	75.1821
1255	ENSG00000152284	TCF7L1	66.0977	0.764758	0.607429	1.25901	0.208027	0.519196	56.9243	36.1051	125.254	63.8207	48.3845
1256	ENSG00000153113	CAST	694.379	-0.377648	0.30012	-1.25832	0.208274	0.519196	842.087	770.242	636.816	506.658	716.091
1257	ENSG00000164024	METAP1	69.2022	0.709254	0.563177	1.25938	0.207893	0.519196	30.425	69.3784	79.1076	85.9626	81.1372
1258	ENSG00000189403	HMGB1	168.948	-0.528519	0.419977	-1.25845	0.20823	0.519196	161.94	251.32	181.947	134.154	115.379
1259	ENSG00000113391	FAM172A	78.6726	0.64938	0.516816	1.2565	0.208934	0.520428	66.7388	50.9719	67.2414	98.9872	109.424
1260	ENSG00000117298	ECE1	414.944	-0.405049	0.322603	-1.25557	0.209273	0.520445	433.802	538.745	417.952	311.289	372.933
1261	ENSG00000168386	FILIP1L	164.394	0.555778	0.442648	1.25558	0.20927	0.520445	120.719	135.925	232.049	110.709	222.569
1262	ENSG00000083642	PDS5B	102.743	-0.672445	0.535884	-1.25484	0.209539	0.520692	133.478	131.677	104.158	36.469	107.935
1263	ENSG00000106723	SPIN1	113.234	0.562085	0.448581	1.25303	0.210195	0.52191	78.5162	97.6961	133.164	104.197	152.597
1264	ENSG00000166033	HTRA1	296.659	0.467299	0.373078	1.25255	0.210369	0.521928	224.753	256.983	439.047	324.313	238.201
1265	ENSG00000125844	RRBP1	1800.67	-0.355075	0.284225	-1.24927	0.211566	0.524483	2161.16	1981.53	1828.7	1763.54	1268.42
1266	ENSG00000051128	HOMER3	75.9479	0.694288	0.557343	1.24571	0.212871	0.526054	36.3138	74.334	63.286	96.3823	109.424
1267	ENSG00000089327	FXYD5	112.131	0.554406	0.444822	1.24636	0.212634	0.526054	103.053	72.2102	125.254	138.061	122.078
1268	ENSG00000113140	SPARC	1281.81	0.390472	0.313445	1.24575	0.212858	0.526054	1186.58	973.422	1679.72	1568.17	1001.19
1269	ENSG00000239672	NME1	130.55	-0.52602	0.422146	-1.24606	0.212742	0.526054	135.44	184.065	121.298	100.29	111.657
1270	ENSG00000005020	SKAP2	98.1503	-0.637799	0.512567	-1.24432	0.213381	0.5269	125.626	124.598	101.521	42.9813	96.0247
1271	ENSG00000064607	SUGP2	102.996	-0.590911	0.478647	-1.23454	0.217	0.527683	137.403	120.35	67.2414	118.524	71.4602
1272	ENSG00000066777	ARFGEF1	108.674	0.544577	0.439846	1.23811	0.215676	0.527683	86.3678	84.2452	126.572	110.709	135.477
1273	ENSG00000067182	TNFRSF1A	310.719	0.467948	0.378618	1.23594	0.216482	0.527683	276.77	227.958	443.002	375.11	230.757
1274	ENSG00000069329	VPS35	407.957	0.426118	0.34462	1.23649	0.216278	0.527683	352.342	323.53	444.321	580.899	338.692
1275	ENSG00000075711	DLG1	65.494	0.819746	0.662901	1.2366	0.216234	0.527683	66.7388	23.3621	40.8722	125.037	71.4602
1276	ENSG00000087095	NLK	66.8134	0.757315	0.612251	1.23694	0.216111	0.527683	29.4436	64.4228	75.1522	115.919	49.1289
1277	ENSG00000102910	LONP2	172.092	-0.515611	0.415728	-1.24026	0.214879	0.527683	231.623	187.605	188.54	148.481	104.213
1278	ENSG00000104852	SNRNP70	70.4227	0.700047	0.564773	1.23952	0.215153	0.527683	43.1839	58.7593	114.706	83.3577	52.1064
1279	ENSG00000111596	CNOT2	99.6966	-0.583027	0.472326	-1.23437	0.217063	0.527683	152.125	96.9882	79.1076	95.0799	75.1821
1280	ENSG00000112343	TRIM38	76.1608	-0.61287	0.494539	-1.23928	0.215244	0.527683	98.1453	94.1564	61.9676	62.5183	64.0165
1281	ENSG00000116260	QSOX1	165.659	0.510573	0.411087	1.24201	0.214234	0.527683	149.181	115.395	206.998	139.364	217.358
1282	ENSG00000134779	TPGS2	79.8369	-0.628144	0.508786	-1.23459	0.216982	0.527683	79.4977	123.182	61.9676	58.6109	75.9265
1283	ENSG00000134871	COL4A2	147.826	-0.613156	0.49514	-1.23835	0.215587	0.527683	211.012	163.535	96.2475	70.333	198.004
1284	ENSG00000139793	MBNL2	66.5844	0.738137	0.595611	1.23929	0.215237	0.527683	45.1468	49.556	126.572	62.5183	49.1289
1285	ENSG00000141469	SLC14A1	117.342	0.567689	0.457157	1.24178	0.214317	0.527683	97.1638	84.9532	97.566	174.53	132.499
1286	ENSG00000149273	RPS3	691.083	0.369926	0.299617	1.23466	0.216956	0.527683	602.612	574.142	717.242	652.534	908.885
1287	ENSG00000152818	UTRN	183.501	-0.4794	0.386509	-1.24033	0.214853	0.527683	221.808	220.878	148.986	131.549	194.283
1288	ENSG00000172086	KRCC1	74.9095	-0.756642	0.611756	-1.23684	0.216148	0.527683	125.626	73.6261	61.9676	24.7468	88.5809
1289	ENSG00000197702	PARVA	104.251	-0.591746	0.479237	-1.23477	0.216918	0.527683	134.459	127.43	89.6552	57.3084	112.401
1290	ENSG00000225746	MEG8	74.9598	-0.623801	0.504817	-1.2357	0.216571	0.527683	103.053	87.077	52.7384	66.4257	65.5052
1291	ENSG00000127022	CANX	3241.31	0.364906	0.296052	1.23257	0.217735	0.528087	2741.2	2785.76	3783.98	4337.2	2558.43
1292	ENSG00000141551	CSNK1D	80.6116	0.628013	0.509438	1.23276	0.217667	0.528087	76.5533	45.3083	94.9291	87.2651	99.0022
1293	ENSG00000177565	TBL1XR1	118.712	0.577186	0.468201	1.23278	0.217659	0.528087	84.4049	98.4041	191.177	119.827	99.7466
1294	ENSG00000184007	PTP4A2	1023.84	0.351512	0.285572	1.2309	0.218359	0.529193	880.363	877.141	936.106	1131.84	1293.73
1295	ENSG00000101654	RNMT	67.0205	-0.785182	0.63845	-1.22983	0.218762	0.529755	68.7017	110.439	79.1076	19.537	57.3171
1296	ENSG00000141582	CBX4	112.698	0.585206	0.476017	1.22938	0.218929	0.529755	92.2566	80.7055	150.304	157.598	82.6259
1297	ENSG00000086758	HUWE1	580.497	0.476539	0.388213	1.22752	0.219627	0.530719	440.672	498.392	874.139	742.404	346.88
1298	ENSG00000117410	ATP6V0B	196.109	0.480732	0.392273	1.2255	0.220386	0.530719	171.754	145.128	286.106	186.252	191.305
1299	ENSG00000142599	RERE	100.611	-0.642088	0.524038	-1.22527	0.220474	0.530719	147.218	110.439	58.0122	58.6109	128.777
1300	ENSG00000151612	ZNF827	158.397	0.490918	0.400225	1.2266	0.219971	0.530719	122.682	131.677	204.361	188.857	144.409
1301	ENSG00000152767	FARP1	123.916	0.525227	0.428133	1.22678	0.219903	0.530719	83.4235	112.563	145.031	128.944	149.62
1302	ENSG00000166508	MCM7	78.634	0.658897	0.537789	1.2252	0.220502	0.530719	64.7759	51.6798	109.432	110.709	56.5727
1303	ENSG00000170430	MGMT	112.077	0.629416	0.513785	1.22506	0.220553	0.530719	59.8686	109.023	121.298	83.3577	186.839
1304	ENSG00000174444	RPL4	131.641	-0.675585	0.551625	-1.22472	0.220682	0.530719	158.995	181.233	119.98	36.469	161.53
1305	ENSG00000130414	NDUFA10	77.1286	-0.686139	0.562123	-1.22062	0.222229	0.534031	94.2195	104.776	47.4645	98.9872	40.1964
1306	ENSG00000160294	MCM3AP	66.5534	0.815251	0.668556	1.21942	0.222685	0.534717	28.4621	62.299	101.521	110.709	29.7751
1307	ENSG00000103657	HERC1	79.4352	-0.64857	0.532634	-1.21767	0.223351	0.535905	101.09	102.652	54.0568	45.5862	93.7916
1308	ENSG00000033178	UBA6	94.8151	-0.603443	0.495948	-1.21675	0.2237	0.536006	121.7	116.811	106.795	52.0986	76.6709
1309	ENSG00000111912	NCOA7	128.243	0.528106	0.434063	1.21666	0.223734	0.536006	101.09	101.236	179.31	147.178	112.401
1310	ENSG00000099917	MED15	114.365	0.572703	0.471139	1.21557	0.224148	0.536423	68.7017	107.607	131.846	165.413	98.2578
1311	ENSG00000124783	SSR1	430.835	0.408657	0.336383	1.21485	0.224422	0.536423	361.175	358.219	549.798	536.615	348.369
1312	ENSG00000157637	SLC38A10	74.9295	-0.621015	0.511063	-1.21514	0.224311	0.536423	90.2937	99.112	54.0568	76.8454	54.3396
1313	ENSG00000152492	CCDC50	194.653	-0.446271	0.367518	-1.21429	0.224639	0.536533	217.883	244.948	171.4	184.95	154.086
1314	ENSG00000176788	BASP1	2304.82	-0.34228	0.282149	-1.21312	0.225084	0.537188	2921.79	2356.03	2269.07	2300.15	1677.08
1315	ENSG00000101557	USP14	202.739	-0.451077	0.371998	-1.21258	0.225291	0.537271	262.048	221.586	147.667	199.277	183.117
1316	ENSG00000213625	LEPROT	140.288	0.53495	0.441442	1.21182	0.22558	0.537553	144.274	77.1658	177.992	152.388	149.62
1317	ENSG00000008513	ST3GAL1	96.9533	-0.637443	0.526537	-1.21063	0.226037	0.538232	121.7	126.014	44.8276	71.6355	120.589
1318	ENSG00000197747	S100A10	300.746	0.404436	0.334543	1.20892	0.226694	0.539386	254.196	249.196	383.672	320.406	296.262
1319	ENSG00000039523	RIPOR1	67.2891	0.672413	0.557116	1.20695	0.22745	0.540367	50.0541	48.8481	101.521	84.6601	51.3621
1320	ENSG00000131171	SH3BGRL	134.73	0.548285	0.454129	1.20733	0.227304	0.540367	112.867	97.6961	210.953	147.178	104.957
1321	ENSG00000136504	KAT7	85.4219	-0.660106	0.547167	-1.20641	0.227661	0.540457	97.1638	121.766	104.158	37.7715	66.2496
1322	ENSG00000085117	CD82	122.675	-0.570281	0.473408	-1.20463	0.228347	0.541267	148.199	157.871	68.5599	89.87	148.876
1323	ENSG00000101972	STAG2	142.307	0.535243	0.444187	1.20499	0.228206	0.541267	105.997	118.226	105.477	208.394	173.44
1324	ENSG00000077312	SNRPA	422.69	0.53718	0.44644	1.20325	0.228878	0.541299	246.345	417.686	561.664	668.164	219.591
1325	ENSG00000125743	SNRPD2	93.4144	-0.605991	0.503445	-1.20369	0.22871	0.541299	88.3308	147.252	61.9676	69.0306	100.491
1326	ENSG00000158747	NBL1	171.599	0.508758	0.422533	1.20407	0.228563	0.541299	111.886	162.119	159.534	165.413	259.043
1327	ENSG00000023287	RB1CC1	181.102	-0.469078	0.390472	-1.20131	0.229631	0.542669	237.512	197.516	175.355	122.432	172.696
1328	ENSG00000115306	SPTBN1	944.703	0.329825	0.275475	1.19729	0.231192	0.543434	771.422	865.106	1089.05	1045.88	952.059
1329	ENSG00000117419	ERI3	123.667	0.598801	0.500264	1.19697	0.231318	0.543434	86.3678	101.944	154.26	200.579	75.1821
1330	ENSG00000125676	THOC2	386.871	-0.376975	0.314573	-1.19837	0.230774	0.543434	471.097	426.182	344.118	380.319	312.639
1331	ENSG00000138069	RAB1A	156.984	0.487613	0.407192	1.1975	0.231112	0.543434	112.867	139.465	203.043	188.857	140.687
1332	ENSG00000164111	ANXA5	232.47	-0.569502	0.47501	-1.19892	0.230557	0.543434	324.861	254.859	138.438	110.709	333.481
1333	ENSG00000198171	DDRGK1	115.338	0.580798	0.48499	1.19755	0.231094	0.543434	98.1453	79.2896	179.31	138.061	81.8815
1334	ENSG00000235698	PA2G4P2	95.1441	0.593767	0.496266	1.19647	0.231514	0.543434	74.5904	70.7943	112.069	144.573	73.6934
1335	ENSG00000256235	SMIM3	108.277	0.571589	0.477225	1.19773	0.231021	0.543434	66.7388	100.528	162.17	95.0799	116.867
1336	ENSG00000278053	DDX52	97.8109	-0.560931	0.468787	-1.19656	0.231479	0.543434	132.496	110.439	87.0183	63.8207	95.2803
1337	ENSG00000137962	ARHGAP29	259.956	-0.408136	0.34125	-1.196	0.231695	0.543453	313.083	297.336	241.278	203.184	244.9
1338	ENSG00000104447	TRPS1	148.819	0.530375	0.444251	1.19386	0.232531	0.544609	131.515	103.36	239.96	131.549	137.71
1339	ENSG00000106299	WASL	109.07	0.616251	0.516691	1.19269	0.232992	0.544609	49.0726	115.395	137.12	153.691	90.0697
1340	ENSG00000166855	CLPX	86.5555	0.647133	0.54286	1.19208	0.23323	0.544609	65.7573	63.0069	135.801	114.617	53.5952
1341	ENSG00000169621	APLF	89.6206	0.731677	0.613727	1.19219	0.233188	0.544609	84.4049	43.8925	72.5153	191.462	55.8283
1342	ENSG00000197077	KIAA1671	124.978	0.604662	0.507185	1.19219	0.233186	0.544609	81.4606	108.315	129.209	224.024	81.8815
1343	ENSG00000226419	SLC16A1-AS1	71.9503	-0.651361	0.546091	-1.19277	0.232959	0.544609	68.7017	114.687	73.8337	58.6109	43.9183
1344	ENSG00000101745	ANKRD12	141.292	-0.544889	0.457334	-1.19145	0.233478	0.544782	184.513	164.951	84.3814	97.6848	174.929
1345	ENSG00000143315	PIGM	90.5004	-0.609967	0.512918	-1.18921	0.234357	0.546021	125.626	101.944	89.6552	89.87	45.407
1346	ENSG00000259956	RBM15B	74.4911	-0.673222	0.565933	-1.18958	0.234212	0.546021	64.7759	126.722	84.3814	42.9813	53.5952
1347	ENSG00000134248	LAMTOR5	117.128	0.624594	0.525647	1.18824	0.23474	0.546101	119.737	57.3434	87.0183	203.184	118.356
1348	ENSG00000142676	RPL11	2633.39	0.347238	0.292177	1.18845	0.234655	0.546101	1870.65	2655.49	3213.09	3108.98	2318.74
1349	ENSG00000105993	DNAJB6	86.4632	0.661689	0.557337	1.18723	0.235136	0.546618	52.017	76.4578	89.6552	58.6109	155.575
1350	ENSG00000025800	KPNA6	215.447	-0.473021	0.399046	-1.18538	0.235867	0.547099	299.343	219.462	184.584	134.154	239.69
1351	ENSG00000101457	DNTTIP1	64.879	0.670059	0.565195	1.18554	0.235806	0.547099	45.1468	50.264	101.521	76.8454	50.6177
1352	ENSG00000116539	ASH1L	167.3	-0.481797	0.406409	-1.1855	0.235821	0.547099	181.569	222.294	138.438	113.314	180.884
1353	ENSG00000172819	RARG	212.584	0.507707	0.428702	1.18429	0.236299	0.547697	181.569	157.163	245.233	336.036	142.92
1354	ENSG00000107341	UBE2R2	135.074	-0.49342	0.417007	-1.18324	0.236713	0.547847	179.606	147.96	109.432	102.895	135.477
1355	ENSG00000196924	FLNA	7173.36	0.450084	0.380297	1.18351	0.236608	0.547847	6200.82	5560.89	9231.85	11117.8	3755.38
1356	ENSG00000131116	ZNF428	111.52	0.555867	0.470649	1.18106	0.237577	0.547876	79.4977	94.8644	100.203	108.104	174.929
1357	ENSG00000134900	TPP2	81.7102	-0.581682	0.492197	-1.18181	0.237282	0.547876	98.1453	106.191	68.5599	56.0059	79.6484
1358	ENSG00000167721	TSR1	85.833	-0.682972	0.578071	-1.18147	0.237417	0.547876	108.941	113.979	51.4199	36.469	118.356
1359	ENSG00000213448	RPS23P2	1213.3	0.472791	0.400328	1.18101	0.237599	0.547876	860.734	1106.51	1605.88	1865.13	628.255
1360	ENSG00000224155	0	72.9095	0.708477	0.599599	1.18158	0.237371	0.547876	60.8501	44.6004	145.031	61.2158	52.8508
1361	ENSG00000170759	KIF5B	990.267	0.322683	0.273475	1.17994	0.238025	0.548455	872.512	848.824	1174.75	1056.3	998.955
1362	ENSG00000166479	TMX3	126.859	-0.603438	0.511656	-1.17938	0.238247	0.548562	178.624	141.589	105.477	50.7961	157.808
1363	ENSG00000117152	RGS4	130.312	0.521441	0.442584	1.17818	0.238727	0.549264	76.5533	129.554	137.12	170.623	137.71
1364	ENSG00000198231	DDX42	190.044	-0.45495	0.386849	-1.17604	0.239579	0.55082	217.883	235.037	177.992	192.765	126.544
1365	ENSG00000071082	RPL31	268.115	0.554974	0.472193	1.17531	0.23987	0.551087	207.087	212.383	199.087	182.345	539.674
1366	ENSG00000113648	MACROH2A1	114.777	0.514532	0.438456	1.17351	0.240592	0.552339	85.3864	96.9882	154.26	115.919	121.334
1367	ENSG00000067066	SP100	99.0522	-0.606749	0.51762	-1.17219	0.241121	0.552354	96.1824	153.624	47.4645	93.7774	104.213
1368	ENSG00000108799	EZH1	65.9389	0.721514	0.615534	1.17218	0.241126	0.552354	36.3138	58.0513	72.5153	121.129	41.6851
1369	ENSG00000233927	RPS28	1872.14	0.327949	0.279628	1.17281	0.240873	0.552354	1354.4	1892.33	2029.11	1880.76	2204.1
1370	ENSG00000086232	EIF2AK1	66.1178	-0.659542	0.562936	-1.17161	0.241353	0.552469	68.7017	101.236	51.4199	37.7715	71.4602
1371	ENSG00000122729	ACO1	96.3116	-0.555759	0.475014	-1.16999	0.242007	0.553562	99.1267	139.465	72.5153	72.938	97.5135
1372	ENSG00000066422	ZBTB11	76.0571	0.61698	0.528683	1.16701	0.243205	0.555266	51.0355	63.7149	108.114	96.3823	61.039
1373	ENSG00000073050	XRCC1	71.5331	0.627952	0.539041	1.16494	0.244042	0.555266	52.9985	54.5116	113.388	74.2404	62.5277
1374	ENSG00000087460	GNAS	135.881	-0.575968	0.493798	-1.1664	0.243451	0.555266	170.773	168.49	137.12	53.401	149.62
1375	ENSG00000107290	SETX	130.267	-0.532811	0.457577	-1.16442	0.244255	0.555266	175.68	145.128	96.2475	79.4503	154.831
1376	ENSG00000110090	CPT1A	109.95	0.56877	0.488737	1.16376	0.244523	0.555266	74.5904	96.2802	93.6106	102.895	182.373
1377	ENSG00000115652	UXS1	108.966	0.547849	0.47064	1.16405	0.244404	0.555266	89.3122	81.4134	160.852	85.9626	127.289
1378	ENSG00000129515	SNX6	110.033	0.518725	0.444255	1.16763	0.242956	0.555266	96.1824	78.5817	114.706	144.573	116.123
1379	ENSG00000135862	LAMC1	718.167	0.360245	0.30896	1.16599	0.243618	0.555266	620.278	608.123	673.733	694.213	994.488
1380	ENSG00000149639	SOGA1	65.281	-0.718106	0.616625	-1.16458	0.244191	0.555266	88.3308	82.8293	65.923	20.8394	68.4827
1381	ENSG00000171365	CLCN5	67.2237	0.648666	0.557011	1.16455	0.244202	0.555266	62.813	37.521	79.1076	96.3823	60.2946
1382	ENSG00000099622	CIRBP	238.292	-0.404646	0.348647	-1.16062	0.245796	0.556925	271.862	286.717	187.221	230.536	215.125
1383	ENSG00000100968	NFATC4	120.538	-0.644284	0.555127	-1.16061	0.245802	0.556925	191.383	117.519	73.8337	49.4936	170.462
1384	ENSG00000141076	UTP4	100.042	0.598326	0.515217	1.16131	0.245517	0.556925	69.6832	82.8293	177.992	83.3577	86.3478
1385	ENSG00000150459	SAP18	121.391	0.52514	0.452795	1.15977	0.246141	0.556925	90.2937	101.944	164.807	95.0799	154.831
1386	ENSG00000164932	CTHRC1	103.04	-0.569796	0.491275	-1.15983	0.246117	0.556925	82.442	173.446	85.6999	87.2651	86.3478
1387	ENSG00000008083	JARID2	147.053	0.532911	0.460671	1.15682	0.247348	0.557644	121.7	109.731	164.807	237.048	101.98
1388	ENSG00000103415	HMOX2	66.8619	-0.634259	0.547857	-1.15771	0.246983	0.557644	79.4977	90.6167	36.9169	67.7281	59.5502
1389	ENSG00000142168	SOD1	410.132	0.38059	0.328979	1.15688	0.24732	0.557644	277.751	416.27	425.862	461.072	469.702
1390	ENSG00000164902	PHAX	184.664	-0.478075	0.413075	-1.15735	0.247127	0.557644	220.827	223.71	108.114	213.604	157.064
1391	ENSG00000177885	GRB2	212.349	-0.459187	0.396385	-1.15843	0.246687	0.557644	213.957	293.088	154.26	244.863	155.575
1392	ENSG00000109099	PMP22	128.847	-0.556188	0.481158	-1.15594	0.247707	0.558052	168.81	149.376	96.2475	162.808	66.994
1393	ENSG00000008838	MED24	72.9105	0.768761	0.667302	1.15204	0.249303	0.558109	57.9057	45.3083	36.9169	54.7035	169.718
1394	ENSG00000116478	HDAC1	183.894	0.54313	0.471196	1.15266	0.24905	0.558109	141.329	146.544	236.004	294.357	101.235
1395	ENSG00000120594	PLXDC2	91.259	0.580302	0.502833	1.15407	0.248474	0.558109	69.6832	71.5022	83.0629	84.6601	147.387
1396	ENSG00000122257	RBBP6	341.115	0.37585	0.325739	1.15384	0.248566	0.558109	279.714	298.752	357.302	431.116	338.692
1397	ENSG00000130731	METTL26	99.7835	-0.558645	0.484571	-1.15286	0.248966	0.558109	145.255	102.652	60.6491	84.6601	105.702
1398	ENSG00000147133	TAF1	89.6483	-0.630311	0.545877	-1.15468	0.248223	0.558109	115.811	111.855	36.9169	110.709	72.949
1399	ENSG00000154582	ELOC	66.5857	0.73692	0.640054	1.15134	0.249592	0.558109	56.9243	38.2289	135.801	36.469	65.5052
1400	ENSG00000163714	U2SURP	195.188	-0.437571	0.379697	-1.15242	0.249148	0.558109	201.198	261.939	181.947	143.271	187.583
1401	ENSG00000164610	RP9	88.4077	0.621308	0.539952	1.15067	0.249867	0.558109	52.9985	79.9976	105.477	143.271	60.2946
1402	ENSG00000171456	ASXL1	155.693	0.492071	0.427456	1.15116	0.249666	0.558109	137.403	112.563	218.864	187.555	122.078
1403	ENSG00000185215	TNFAIP2	77.0992	-0.763636	0.661081	-1.15513	0.248036	0.558109	133.478	71.5022	17.14	96.3823	66.994
1404	ENSG00000185989	RASA3	82.293	0.678598	0.589741	1.15067	0.249867	0.558109	61.8315	58.7593	80.426	162.808	47.6402
1405	ENSG00000178952	TUFM	132.451	0.472093	0.410601	1.14976	0.250243	0.558549	108.941	106.191	151.623	135.456	160.041
1406	ENSG00000005007	UPF1	90.0815	0.591536	0.514798	1.14907	0.250529	0.55879	59.8686	77.8737	81.7445	149.783	81.1372
1407	ENSG00000150938	CRIM1	205.523	-0.456315	0.397297	-1.14855	0.250742	0.558868	276.77	214.507	220.183	126.339	189.816
1408	ENSG00000132463	GRSF1	81.2705	0.603082	0.526549	1.14535	0.252065	0.560621	55.9428	67.9625	121.298	59.9133	101.235
1409	ENSG00000167118	URM1	81.5453	0.579233	0.505475	1.14592	0.251829	0.560621	58.8872	66.5466	93.6106	117.222	71.4602
1410	ENSG00000196262	PPIA	69.4644	0.648431	0.565982	1.14567	0.25193	0.560621	55.9428	48.1401	48.783	82.0552	112.401
1411	ENSG00000028203	VEZT	71.6283	0.637691	0.558723	1.14134	0.25373	0.560863	45.1468	62.299	50.1015	101.592	99.0022
1412	ENSG00000075785	RAB7A	437.76	0.349332	0.306079	1.14131	0.253739	0.560863	382.767	368.838	502.333	505.356	429.506
1413	ENSG00000091640	SPAG7	102.593	0.515922	0.451532	1.1426	0.253204	0.560863	71.6461	91.3246	121.298	108.104	120.589
1414	ENSG00000114302	PRKAR2A	1041.4	0.379803	0.332252	1.14312	0.25299	0.560863	915.695	847.408	1249.9	1449.64	744.378
1415	ENSG00000126778	SIX1	100.895	-0.592561	0.517737	-1.14452	0.252407	0.560863	135.44	118.226	89.6552	44.2838	116.867
1416	ENSG00000136718	IMP4	158.234	-0.455106	0.399136	-1.14023	0.254191	0.560863	173.717	203.888	162.17	115.919	135.477
1417	ENSG00000164080	RAD54L2	107.813	-0.497748	0.436652	-1.13992	0.25432	0.560863	130.533	130.969	87.0183	93.7774	96.7691
1418	ENSG00000165280	VCP	378.186	0.368574	0.323194	1.14041	0.254114	0.560863	291.491	351.848	395.538	475.399	376.655
1419	ENSG00000179981	TSHZ1	104.48	0.632646	0.553669	1.14264	0.253187	0.560863	68.7017	87.7849	100.203	203.184	62.5277
1420	ENSG00000182180	MRPS16	65.2531	-0.663253	0.581612	-1.14037	0.254132	0.560863	95.2009	72.9181	29.0061	59.9133	69.2271
1421	ENSG00000232573	RPL3P4	432.099	0.409788	0.358491	1.14309	0.253	0.560863	365.1	356.095	446.958	655.139	337.203
1422	ENSG00000237205	RPL7P34	132.451	0.593735	0.519833	1.14216	0.253385	0.560863	74.5904	127.43	221.501	162.808	75.9265
1423	ENSG00000005243	COPZ2	109.257	0.688445	0.604384	1.13908	0.254668	0.560969	81.4606	77.8737	131.846	214.907	40.1964
1424	ENSG00000150961	SEC24D	215.238	0.47872	0.420318	1.13895	0.254726	0.560969	161.94	185.481	254.463	326.918	147.387
1425	ENSG00000124795	DEK	1745.76	0.357271	0.313866	1.13829	0.254998	0.561175	1554.62	1432.17	2238.74	2215.49	1287.77
1426	ENSG00000104884	ERCC2	90.3137	0.736976	0.647854	1.13757	0.255302	0.56119	89.3122	39.6448	73.8337	201.882	46.8958
1427	ENSG00000139168	ZCRB1	288.709	-0.377337	0.331748	-1.13742	0.255363	0.56119	329.768	339.813	251.826	283.937	238.201
1428	ENSG00000101040	ZMYND8	87.0001	-0.556069	0.49029	-1.13416	0.256726	0.561431	112.867	102.652	54.0568	87.2651	78.1596
1429	ENSG00000108312	UBTF	178.413	-0.502926	0.4431	-1.13502	0.256368	0.561431	243.4	190.437	85.6999	200.579	171.951
1430	ENSG00000124164	VAPB	73.5047	0.682858	0.601378	1.13549	0.25617	0.561431	39.2581	67.9625	137.12	75.5429	47.6402
1431	ENSG00000126768	TIMM17B	67.5329	0.641986	0.565147	1.13596	0.255972	0.561431	59.8686	41.0607	96.2475	89.87	50.6177
1432	ENSG00000128829	EIF2AK4	301.038	-0.393039	0.346269	-1.13507	0.256346	0.561431	300.325	401.404	275.558	300.869	227.035
1433	ENSG00000135111	TBX3	175.545	0.455578	0.401176	1.13561	0.256121	0.561431	122.682	164.243	154.26	231.839	204.704
1434	ENSG00000198467	TPM2	3193.08	0.326957	0.288197	1.13449	0.256589	0.561431	2487.98	3051.23	3876.27	3902.18	2647.75
1435	ENSG00000035687	ADSS2	65.6946	0.637442	0.562705	1.13282	0.257291	0.561614	50.0541	48.8481	72.5153	52.0986	104.957
1436	ENSG00000064393	HIPK2	67.5074	0.597216	0.526863	1.13353	0.256991	0.561614	58.8872	44.6004	73.8337	76.8454	83.3703
1437	ENSG00000081760	AACS	73.9776	-0.569822	0.503072	-1.13268	0.257347	0.561614	90.2937	93.4485	67.2414	63.8207	55.0839
1438	ENSG00000134250	NOTCH2	83.4798	0.658917	0.582023	1.13212	0.257586	0.561745	59.8686	63.7149	61.9676	169.32	62.5277
1439	ENSG00000169139	UBE2V2	175.699	0.46221	0.409275	1.12934	0.258755	0.563902	167.828	118.934	154.26	246.166	191.305
1440	ENSG00000106211	HSPB1	916.304	-0.323861	0.286883	-1.12889	0.258942	0.563919	1164	921.034	788.439	777.571	930.472
1441	ENSG00000135390	ATP5MC2	135.05	0.525192	0.465474	1.12829	0.259196	0.564079	86.3678	126.722	134.483	217.511	110.168
1442	ENSG00000111676	ATN1	75.8365	-0.603527	0.535489	-1.12706	0.259718	0.564432	113.849	77.1658	80.426	42.9813	64.7609
1443	ENSG00000166025	AMOTL1	108.236	0.52806	0.4685	1.12713	0.259688	0.564432	78.5162	92.0326	135.801	148.481	86.3478
1444	ENSG00000135269	TES	150.338	0.473825	0.420935	1.12565	0.260315	0.564603	132.496	111.147	220.183	147.178	140.687
1445	ENSG00000168924	LETM1	72.6038	-0.584125	0.518948	-1.1256	0.260337	0.564603	77.5348	104.068	60.6491	50.7961	69.9715
1446	ENSG00000275832	ARHGAP23	113.006	0.505975	0.44949	1.12566	0.260308	0.564603	77.5348	102.652	110.751	154.993	119.1
1447	ENSG00000003436	TFPI	80.3711	-0.664414	0.590582	-1.12502	0.260582	0.564745	121.7	85.6611	64.6045	28.6542	101.235
1448	ENSG00000114127	XRN1	97.9647	-0.546716	0.487184	-1.1222	0.261779	0.566454	133.478	109.023	63.286	71.6355	112.401
1449	ENSG00000159069	FBXW5	94.9004	0.532088	0.474282	1.12188	0.261913	0.566454	83.4235	66.5466	123.935	85.9626	114.634
1450	ENSG00000164615	CAMLG	73.2315	-0.740464	0.659714	-1.1224	0.261692	0.566454	77.5348	116.103	17.14	58.6109	96.7691
1451	ENSG00000253729	PRKDC	111.272	-0.517215	0.461397	-1.12098	0.262298	0.566896	128.57	143.712	71.1968	88.5675	124.311
1452	ENSG00000167779	IGFBP6	210.385	-0.432244	0.385778	-1.12045	0.262524	0.566994	224.753	273.974	183.266	140.666	229.268
1453	ENSG00000107372	ZFAND5	211.941	0.42315	0.378024	1.11937	0.262981	0.56759	188.439	163.535	191.177	291.752	224.802
1454	ENSG00000010256	UQCRC1	165.748	-0.46893	0.419796	-1.11704	0.263976	0.568264	163.903	234.329	131.846	113.314	185.35
1455	ENSG00000130985	UBA1	204.182	-0.469231	0.420102	-1.11694	0.264018	0.568264	265.974	225.126	110.751	177.135	241.923
1456	ENSG00000171867	PRNP	88.9082	-1.56164	1.39733	-1.11759	0.263741	0.568264	144.274	150.792	50.1015	2.60493	96.7691
1457	ENSG00000197256	KANK2	410.527	-0.370467	0.331514	-1.1175	0.263781	0.568264	496.615	453.791	437.728	282.635	381.866
1458	ENSG00000003402	CFLAR	78.4299	0.620081	0.555733	1.11579	0.264513	0.568548	62.813	55.9275	127.891	49.4936	96.0247
1459	ENSG00000156650	KAT6B	78.4267	-0.575983	0.516186	-1.11584	0.264489	0.568548	100.108	94.8644	85.6999	63.8207	47.6402
1460	ENSG00000108821	COL1A1	22730.6	0.396733	0.355806	1.11502	0.26484	0.568861	21035.5	17169	29831.5	32396.2	13220.9
1461	ENSG00000170876	TMEM43	71.0839	-0.588202	0.527785	-1.11447	0.265077	0.56898	83.4235	94.8644	44.8276	58.6109	73.6934
1462	ENSG00000100596	SPTLC2	80.0704	-0.705302	0.633214	-1.11384	0.265346	0.568996	106.978	102.652	44.8276	26.0493	119.845
1463	ENSG00000160948	VPS28	111.049	-0.502988	0.451674	-1.11361	0.265447	0.568996	128.57	140.881	121.298	78.1478	86.3478
1464	ENSG00000140319	SRP14	705.361	0.329523	0.297671	1.10701	0.268291	0.574701	602.612	620.158	846.451	623.88	833.703
1465	ENSG00000105429	MEGF8	83.9153	-0.621657	0.562531	-1.10511	0.269114	0.576068	70.6646	140.881	92.2922	75.5429	40.1964
1466	ENSG00000109475	RPL34	689.793	-0.325053	0.294931	-1.10213	0.270405	0.577102	687.017	882.097	684.28	576.991	618.578
1467	ENSG00000111481	COPZ1	77.9772	0.627337	0.569196	1.10215	0.270398	0.577102	49.0726	67.9625	143.712	70.333	58.8058
1468	ENSG00000153187	HNRNPU	270.153	-0.398063	0.360774	-1.10336	0.269872	0.577102	314.065	318.574	218.864	194.067	305.195
1469	ENSG00000163956	LRPAP1	112.519	-0.505311	0.458085	-1.1031	0.269986	0.577102	166.847	106.899	81.7445	113.314	93.7916
1470	ENSG00000198752	CDC42BPB	120.909	0.482189	0.437609	1.10187	0.270517	0.577102	115.811	79.9976	131.846	125.037	151.853
1471	ENSG00000169100	SLC25A6	369.86	0.36294	0.329529	1.10139	0.270727	0.577158	300.325	331.317	427.181	328.221	462.258
1472	ENSG00000100241	SBF1	122.528	-0.572971	0.520535	-1.10074	0.271012	0.577373	146.236	159.995	71.1968	62.5183	172.696
1473	ENSG00000125351	UPF3B	119.12	-0.479397	0.435957	-1.09964	0.271487	0.577993	146.236	140.173	117.343	110.709	81.1372
1474	ENSG00000089289	IGBP1	85.097	-0.543251	0.494463	-1.09867	0.271913	0.578506	118.756	91.3246	55.3753	78.1478	81.8815
1475	ENSG00000112081	SRSF3	313.308	-0.362682	0.330322	-1.09796	0.27222	0.57864	362.156	361.051	309.838	240.956	292.54
1476	ENSG00000163682	RPL9	306.146	-0.523214	0.476838	-1.09726	0.272529	0.57864	299.343	450.96	199.087	130.246	451.093
1477	ENSG00000164040	PGRMC2	260.657	0.513131	0.46748	1.09765	0.272356	0.57864	194.328	221.586	179.31	196.672	511.387
1478	ENSG00000161638	ITGA5	238.06	0.41337	0.377364	1.09542	0.273335	0.579958	170.773	226.542	208.317	257.888	326.782
1479	ENSG00000131626	PPFIA1	410.33	-0.363017	0.332034	-1.09331	0.274256	0.581519	524.096	422.642	337.526	453.257	314.127
1480	ENSG00000216676	RPL8P1	67.8214	0.698215	0.638924	1.0928	0.274482	0.581606	55.9428	42.4766	100.203	110.709	29.7751
1481	ENSG00000226360	RPL10AP6	97.3369	-0.542718	0.496886	-1.09224	0.274728	0.581733	120.719	119.642	88.3368	50.7961	107.19
1482	ENSG00000087116	ADAMTS2	114.563	0.524718	0.480604	1.09179	0.274925	0.581759	87.3493	93.4485	150.304	162.808	78.904
1483	ENSG00000102241	HTATSF1	82.0295	-0.575011	0.52741	-1.09025	0.275601	0.582403	78.5162	126.014	46.1461	76.8454	82.6259
1484	ENSG00000135999	EPC2	79.6706	0.653652	0.599318	1.09066	0.275422	0.582403	47.1097	70.7943	110.751	130.246	39.452
1485	ENSG00000138778	CENPE	147.392	-0.485962	0.446822	-1.0876	0.276773	0.584401	150.162	206.011	143.712	80.7528	156.319
1486	ENSG00000161202	DVL3	76.108	0.548402	0.504386	1.08726	0.27692	0.584401	61.8315	57.3434	101.521	74.2404	85.6034
1487	ENSG00000161203	AP2M1	1184.82	0.384487	0.354207	1.08549	0.277707	0.585668	945.139	1056.25	1590.06	1589.01	743.633
1488	ENSG00000171055	FEZ2	100.225	-0.573169	0.528679	-1.08415	0.278297	0.586519	129.552	121.058	50.1015	66.4257	133.988
1489	ENSG00000106346	USP42	74.1902	0.664284	0.613532	1.08272	0.278933	0.587463	67.7202	42.4766	35.5984	122.432	102.724
1490	ENSG00000086589	RBM22	102.665	-0.489284	0.452139	-1.08215	0.279184	0.587598	106.978	140.881	87.0183	95.0799	83.3703
1491	ENSG00000204227	RING1	121.826	-0.474892	0.439079	-1.08156	0.279447	0.587757	131.515	161.411	81.7445	125.037	109.424
1492	ENSG00000116117	PARD3B	120.914	-1.33265	1.23369	-1.08021	0.280049	0.588423	187.457	191.853	7.91076	67.7281	149.62
1493	ENSG00000242372	EIF6	299.703	-0.39054	0.361608	-1.08001	0.280139	0.588423	264.011	434.677	236.004	273.517	290.307
1494	ENSG00000206538	VGLL3	139.394	-0.448832	0.415906	-1.07917	0.280513	0.588814	193.346	138.757	135.801	115.919	113.145
1495	ENSG00000024048	UBR2	102.592	0.502243	0.46649	1.07664	0.28164	0.590784	96.1824	67.9625	131.846	122.432	94.536
1496	ENSG00000013588	GPRC5A	119.627	0.474234	0.441458	1.07424	0.282714	0.591294	105.997	88.4929	110.751	127.641	165.252
1497	ENSG00000053372	MRTO4	149.642	-0.464766	0.432433	-1.07477	0.282478	0.591294	146.236	212.383	148.986	92.4749	148.131
1498	ENSG00000075292	ZNF638	111.848	-0.53526	0.498735	-1.07324	0.283165	0.591294	116.793	158.579	54.0568	100.29	129.522
1499	ENSG00000101558	VAPA	147.332	-0.44748	0.416442	-1.07453	0.282584	0.591294	138.385	212.383	119.98	123.734	142.176
1500	ENSG00000103642	LACTB	71.9816	-0.556864	0.518905	-1.07315	0.283203	0.591294	81.4606	96.9882	48.783	61.2158	71.4602
1501	ENSG00000119596	YLPM1	519.297	0.37294	0.347361	1.07364	0.282985	0.591294	447.542	433.969	639.453	698.121	377.399
1502	ENSG00000213237	PTMAP10	74.6396	-0.563718	0.524248	-1.07529	0.282246	0.591294	113.849	71.5022	54.0568	74.2404	59.5502
1503	ENSG00000007392	LUC7L	125.668	0.566007	0.527639	1.07272	0.283398	0.591309	82.442	111.855	179.31	191.462	63.2721
1504	ENSG00000107521	HPS1	180.523	-0.421178	0.393034	-1.07161	0.283896	0.591954	204.142	222.294	138.438	136.759	200.982
1505	ENSG00000083444	PLOD1	144.955	0.438662	0.409784	1.07047	0.284407	0.592625	122.682	116.103	196.45	145.876	143.665
1506	ENSG00000108578	BLMH	196.331	0.472561	0.44198	1.06919	0.284984	0.593433	167.828	150.084	278.195	265.703	119.845
1507	ENSG00000101608	MYL12A	171.354	-0.432548	0.405542	-1.06659	0.286157	0.593903	163.903	242.116	143.712	127.641	179.395
1508	ENSG00000117724	CENPF	503.467	-0.35945	0.336953	-1.06677	0.286077	0.593903	529.985	630.069	586.714	342.548	428.017
1509	ENSG00000132305	IMMT	186.915	-0.410486	0.38459	-1.06733	0.285821	0.593903	204.142	234.329	201.724	153.691	140.687
1510	ENSG00000134982	APC	193.186	0.445283	0.417311	1.06703	0.285959	0.593903	151.144	165.659	208.317	295.659	145.154
1511	ENSG00000198695	MT-ND6	437.974	0.499462	0.467816	1.06765	0.28568	0.593903	409.266	293.796	399.493	225.326	861.989
1512	ENSG00000117222	RBBP5	124.599	-0.573802	0.538685	-1.06519	0.28679	0.594824	148.199	161.411	64.6045	186.252	62.5277
1513	ENSG00000120509	PDZD11	72.7986	-0.671793	0.631297	-1.06415	0.287262	0.595408	84.4049	104.068	34.2799	32.5616	108.679
1514	ENSG00000178177	LCORL	80.0503	0.60256	0.566729	1.06322	0.28768	0.595882	70.6646	51.6798	130.527	46.8887	100.491
1515	ENSG00000140299	BNIP2	70.3938	0.585698	0.551795	1.06144	0.28849	0.596839	64.7759	43.8925	54.0568	92.4749	96.7691
1516	ENSG00000169895	SYAP1	314.093	-0.385397	0.363113	-1.06137	0.288523	0.596839	333.694	397.156	203.043	358.178	278.397
1517	ENSG00000102158	MAGT1	121.494	-0.450502	0.425029	-1.05993	0.289176	0.597796	138.385	150.792	116.024	110.709	91.5584
1518	ENSG00000136888	ATP6V1G1	140.322	0.430266	0.406429	1.05865	0.28976	0.598609	103.053	128.846	158.215	164.11	147.387
1519	ENSG00000089280	FUS	523.844	0.342552	0.323763	1.05803	0.29004	0.598792	459.32	442.464	657.911	632.997	426.528
1520	ENSG00000176343	RPL37AP8	74.1383	-0.661937	0.626032	-1.05735	0.29035	0.599039	67.7202	122.474	92.2922	23.4443	64.7609
1521	ENSG00000114353	GNAI2	666.721	-0.308543	0.292172	-1.05603	0.290954	0.599723	809.699	698.74	593.307	552.245	679.617
1522	ENSG00000124201	ZNFX1	303.466	-0.412427	0.390634	-1.05579	0.291065	0.599723	310.139	404.235	185.903	239.653	377.399
1523	ENSG00000119541	VPS4B	76.1875	-0.67437	0.640069	-1.05359	0.292071	0.601401	82.442	114.687	58.0122	20.8394	104.957
1524	ENSG00000105058	FAM32A	254.907	0.380163	0.361432	1.05183	0.292879	0.602436	251.252	180.525	324.341	273.517	244.9
1525	ENSG00000109685	NSD2	138.787	-0.449522	0.427474	-1.05158	0.292994	0.602436	175.68	155.04	152.941	91.1725	119.1
1526	ENSG00000111605	CPSF6	130.044	0.481401	0.457938	1.05124	0.29315	0.602436	102.071	107.607	208.317	125.037	107.19
1527	ENSG00000099814	CEP170B	66.0442	0.566194	0.541087	1.0464	0.295376	0.603452	39.2581	63.0069	77.7891	74.2404	75.9265
1528	ENSG00000105202	FBL	413.677	0.356476	0.340058	1.04828	0.294509	0.603452	313.083	394.324	416.633	574.387	369.956
1529	ENSG00000114861	FOXP1	332.417	0.399972	0.38156	1.04825	0.294522	0.603452	308.176	249.196	506.288	349.06	249.366
1530	ENSG00000140092	FBLN5	107.649	-0.56068	0.535663	-1.0467	0.295237	0.603452	133.478	134.509	51.4199	67.7281	151.109
1531	ENSG00000142507	PSMB6	134.69	0.484651	0.462586	1.0477	0.294776	0.603452	94.2195	123.182	181.947	92.4749	181.628
1532	ENSG00000143384	MCL1	126.467	-0.57359	0.546682	-1.04922	0.294076	0.603452	147.218	168.49	116.024	39.0739	161.53
1533	ENSG00000173230	GOLGB1	424.449	-0.323032	0.308426	-1.04736	0.294935	0.603452	445.58	519.63	369.169	372.505	415.363
1534	ENSG00000189067	LITAF	186.132	-0.431412	0.411154	-1.04927	0.294053	0.603452	233.586	208.135	131.846	131.549	225.546
1535	ENSG00000198727	MT-CYB	3029.64	-0.411007	0.39273	-1.04654	0.295312	0.603452	4320.36	2799.91	2009.33	1642.41	4376.2
1536	ENSG00000130766	SESN2	87.2805	0.576721	0.551442	1.04584	0.295635	0.603587	35.3323	99.112	88.3368	98.9872	114.634
1537	ENSG00000166801	FAM111A	72.5114	-0.557655	0.53381	-1.04467	0.296175	0.604298	87.3493	92.0326	83.0629	44.2838	55.8283
1538	ENSG00000008441	NFIX	846.332	-0.314151	0.302444	-1.03871	0.298941	0.606087	1068.8	848.824	690.873	939.076	684.083
1539	ENSG00000068400	GRIPAP1	120.101	0.446653	0.43022	1.0382	0.299178	0.606087	97.1638	99.82	131.846	156.296	115.379
1540	ENSG00000101940	WDR13	130.173	-0.517081	0.496717	-1.041	0.297876	0.606087	220.827	96.9882	151.623	89.87	91.5584
1541	ENSG00000108846	ABCC3	76.5324	-0.583024	0.561446	-1.03843	0.299069	0.606087	85.3864	106.191	75.1522	32.5616	83.3703
1542	ENSG00000115866	DARS1	263.874	-0.383696	0.369233	-1.03917	0.298725	0.606087	279.714	334.857	193.814	205.789	305.195
1543	ENSG00000118473	SGIP1	88.6597	0.511148	0.491671	1.03961	0.29852	0.606087	59.8686	81.4134	77.7891	108.104	116.123
1544	ENSG00000119396	RAB14	295.08	0.34809	0.334356	1.04108	0.29784	0.606087	231.623	275.39	341.481	290.449	336.459
1545	ENSG00000130517	PGPEP1	133.508	-0.686178	0.659795	-1.03999	0.298346	0.606087	127.589	217.338	27.6876	227.931	66.994
1546	ENSG00000163541	SUCLG1	140.922	-0.48206	0.463979	-1.03897	0.298819	0.606087	139.366	201.056	79.1076	114.617	170.462
1547	ENSG00000167397	VKORC1	136.887	-0.442325	0.425793	-1.03883	0.298886	0.606087	163.903	162.119	109.432	96.3823	152.597
1548	ENSG00000171603	CLSTN1	130.542	0.438913	0.421663	1.04091	0.297918	0.606087	107.96	106.899	170.081	147.178	120.589
1549	ENSG00000054267	ARID4B	309.084	0.356786	0.343999	1.03717	0.299656	0.606663	278.733	249.904	374.442	375.11	267.232
1550	ENSG00000077235	GTF3C1	103.397	-0.58313	0.562751	-1.03621	0.300102	0.606672	136.422	121.058	87.0183	136.759	35.7301
1551	ENSG00000105976	MET	134.428	0.443052	0.427823	1.0356	0.30039	0.606672	90.2937	130.262	167.444	157.598	126.544
1552	ENSG00000116977	LGALS8	97.3237	0.633348	0.611879	1.03509	0.300628	0.606672	98.1453	48.1401	61.9676	208.394	69.9715
1553	ENSG00000151914	DST	1438.15	-0.285517	0.275736	-1.03547	0.300449	0.606672	1619.4	1604.91	1365.92	1111	1489.5
1554	ENSG00000179295	PTPN11	285.005	-0.39116	0.377845	-1.03524	0.300557	0.606672	344.49	321.406	177.992	240.956	340.181
1555	ENSG00000108953	YWHAE	913.214	0.291034	0.281347	1.03443	0.300934	0.606753	714.498	895.548	1029.72	932.564	993.744
1556	ENSG00000163110	PDLIM5	289.802	-0.44987	0.435005	-1.03417	0.301055	0.606753	279.714	412.023	208.317	153.691	395.265
1557	ENSG00000183255	PTTG1IP	779.377	-0.301814	0.292074	-1.03335	0.301442	0.607143	1001.08	756.791	758.114	722.867	658.03
1558	ENSG00000147274	RBMX	284.672	0.362156	0.350641	1.03284	0.301679	0.60723	272.844	213.091	336.207	345.153	256.066
1559	ENSG00000108588	CCDC47	128.51	0.470074	0.455594	1.03178	0.302174	0.607837	99.1267	109.023	162.17	178.438	93.7916
1560	ENSG00000129055	ANAPC13	68.0601	-0.650241	0.630539	-1.03125	0.302425	0.607952	72.6275	101.236	22.4138	91.1725	52.8508
1561	ENSG00000089053	ANAPC5	102.018	-0.482504	0.468735	-1.02937	0.303304	0.608549	120.719	125.306	109.432	63.8207	90.8141
1562	ENSG00000112697	TMEM30A	72.4528	0.55419	0.538279	1.02956	0.303217	0.608549	63.7944	49.556	56.6938	102.895	89.3253
1563	ENSG00000117395	EBNA1BP2	235.323	-0.358903	0.348415	-1.0301	0.302961	0.608549	285.603	256.983	220.183	192.765	221.08
1564	ENSG00000255302	EID1	440.392	0.326946	0.317859	1.02859	0.303673	0.6089	364.119	399.28	523.428	523.59	391.543
1565	ENSG00000101109	STK4	234.618	-0.413884	0.403765	-1.02506	0.305335	0.610875	284.621	268.31	134.483	200.579	285.097
1566	ENSG00000131263	RLIM	67.0893	0.567984	0.554439	1.02443	0.305632	0.610875	47.1097	56.6354	64.6045	106.802	60.2946
1567	ENSG00000136628	EPRS1	303.83	-0.381124	0.37145	-1.02604	0.304871	0.610875	358.23	349.016	233.367	207.092	371.444
1568	ENSG00000167658	EEF2	1322.93	0.287003	0.280097	1.02466	0.305526	0.610875	1019.73	1317.48	1325.05	1362.38	1589.99
1569	ENSG00000168476	REEP4	68.3943	0.587058	0.572436	1.02554	0.305107	0.610875	73.609	31.8574	92.2922	69.0306	75.1821
1570	ENSG00000103275	UBE2I	130.966	0.431939	0.422273	1.02289	0.30636	0.611938	105.015	111.147	160.852	160.203	117.612
1571	ENSG00000074657	ZNF532	110.405	0.59881	0.585836	1.02215	0.306711	0.612251	74.5904	93.4485	209.635	128.944	45.407
1572	ENSG00000166068	SPRED1	115.598	0.449021	0.439639	1.02134	0.307094	0.612625	89.3122	100.528	106.795	130.246	151.109
1573	ENSG00000137076	TLN1	758.219	0.303764	0.297672	1.02047	0.307508	0.612671	563.354	765.994	747.566	812.737	901.441
1574	ENSG00000174886	NDUFA11	199.754	0.426246	0.417545	1.02084	0.307331	0.612671	164.884	166.367	296.653	139.364	231.501
1575	ENSG00000081189	MEF2C	104.23	0.514019	0.50462	1.01863	0.308381	0.612695	74.5904	90.6167	137.12	151.086	67.7384
1576	ENSG00000163798	SLC4A1AP	105.501	-0.480614	0.471595	-1.01912	0.308144	0.612695	108.941	145.128	114.706	66.4257	92.3028
1577	ENSG00000166949	SMAD3	298.91	0.413738	0.40627	1.01838	0.308497	0.612695	243.4	254.152	400.812	411.579	184.606
1578	ENSG00000197498	RPF2	106.875	-0.494374	0.485135	-1.01905	0.308181	0.612695	161.94	97.6961	68.5599	88.5675	117.612
1579	ENSG00000198886	MT-ND4	9598.59	0.322253	0.316307	1.0188	0.308299	0.612695	8974.4	7717.99	8430.23	8118.26	14752.1
1580	ENSG00000112320	SOBP	73.4531	0.588626	0.580071	1.01475	0.310226	0.614243	45.1468	67.2546	56.6938	134.154	64.0165
1581	ENSG00000120705	ETF1	159.531	0.396398	0.390819	1.01428	0.310451	0.614243	139.366	128.846	158.215	199.277	171.951
1582	ENSG00000135047	CTSL	115.859	-0.452751	0.445783	-1.01563	0.309806	0.614243	129.552	147.252	101.521	78.1478	122.822
1583	ENSG00000144824	PHLDB2	191.055	0.411735	0.405892	1.0144	0.310394	0.614243	178.624	140.173	284.787	174.53	177.162
1584	ENSG00000152404	CWF19L2	116.857	-0.447342	0.440549	-1.01542	0.309906	0.614243	135.44	142.297	98.8844	125.037	82.6259
1585	ENSG00000159216	RUNX1	82.3317	0.528043	0.519832	1.0158	0.309726	0.614243	85.3864	45.3083	90.9737	82.0552	107.935
1586	ENSG00000132294	EFR3A	134.283	0.446614	0.440686	1.01345	0.310845	0.614247	122.682	97.6961	199.087	132.851	119.1
1587	ENSG00000165525	NEMF	417.324	-0.33359	0.329063	-1.01376	0.310698	0.614247	446.561	505.471	329.615	471.492	333.481
1588	ENSG00000134440	NARS1	323.266	-0.397936	0.394068	-1.00982	0.312583	0.616903	324.861	431.845	286.106	179.74	393.776
1589	ENSG00000147874	HAUS6	65.0192	0.54525	0.539863	1.00998	0.312505	0.616903	45.1468	56.6354	63.286	88.5675	71.4602
1590	ENSG00000106771	TMEM245	92.558	-0.46685	0.463301	-1.00766	0.313618	0.616988	102.071	119.642	85.6999	79.4503	75.9265
1591	ENSG00000134046	MBD2	188.347	0.374854	0.3723	1.00686	0.314003	0.616988	170.773	149.376	206.998	187.555	227.035
1592	ENSG00000136731	UGGT1	135.167	-0.41948	0.416484	-1.00719	0.313842	0.616988	168.81	149.376	123.935	135.456	98.2578
1593	ENSG00000143401	ANP32E	460.467	0.409706	0.406023	1.00907	0.312941	0.616988	389.637	378.749	734.382	535.313	264.254
1594	ENSG00000178691	SUZ12	119.68	0.506759	0.502822	1.00783	0.313536	0.616988	90.2937	100.528	83.0629	213.604	110.912
1595	ENSG00000205581	HMGN1	106.159	-0.534762	0.530847	-1.00738	0.313755	0.616988	104.034	157.163	43.5092	105.5	120.589
1596	ENSG00000232119	MCTS1	283.667	0.368318	0.365717	1.00711	0.313881	0.616988	223.771	258.399	340.163	371.202	224.802
1597	ENSG00000130764	LRRC47	138.315	0.440844	0.438033	1.00642	0.314215	0.617018	115.811	112.563	142.394	114.617	206.193
1598	ENSG00000008018	PSMB1	68.5996	-0.666884	0.66293	-1.00596	0.314433	0.61706	85.3864	92.0326	27.6876	29.9567	107.935
1599	ENSG00000198162	MAN1A2	267.264	-0.411939	0.410628	-1.00319	0.315768	0.619292	291.491	337.689	141.075	231.839	334.226
1600	ENSG00000168003	SLC3A2	95.9278	-0.505166	0.503842	-1.00263	0.31604	0.619439	115.811	118.226	59.3307	66.4257	119.845
1601	ENSG00000130779	CLIP1	431.279	-0.344676	0.344529	-1.00043	0.317104	0.620362	536.855	453.083	362.576	296.962	506.921
1602	ENSG00000183864	TOB2	249.624	-0.359673	0.359493	-1.0005	0.317069	0.620362	266.955	307.955	275.558	196.672	200.982
1603	ENSG00000196950	SLC39A10	173.086	0.482454	0.481989	1.00096	0.316844	0.620362	147.218	131.677	233.367	263.098	90.0697
1604	ENSG00000130939	UBE4B	109.061	0.574646	0.574663	0.999969	0.317326	0.620407	87.3493	80.7055	191.177	140.666	45.407
1605	ENSG00000054118	THRAP3	238.783	-0.400079	0.400403	-0.999189	0.317703	0.620758	322.898	237.161	189.858	153.691	290.307
1606	ENSG00000173517	PEAK1	171.073	0.405131	0.405774	0.998416	0.318078	0.621103	110.904	174.862	185.903	216.209	167.485
1607	ENSG00000116830	TTF2	76.8443	-0.601665	0.602978	-0.997823	0.318365	0.621278	91.2751	101.236	112.069	46.8887	32.7526
1608	ENSG00000108055	SMC3	271.642	-0.391472	0.392567	-0.997209	0.318663	0.621472	293.454	341.229	218.864	166.715	337.947
1609	ENSG00000118680	MYL12B	162.627	-0.525149	0.527502	-0.995539	0.319474	0.622667	191.383	208.135	88.3368	72.938	252.344
1610	ENSG00000070367	EXOC5	68.5347	0.514438	0.518063	0.993002	0.320709	0.623451	58.8872	50.264	76.4706	78.1478	78.904
1611	ENSG00000111639	MRPL51	80.1003	0.485236	0.488577	0.993163	0.320631	0.623451	67.7202	61.591	83.0629	95.0799	93.0472
1612	ENSG00000137710	RDX	410.855	-0.344794	0.347117	-0.993306	0.320561	0.623451	475.023	467.95	355.984	272.215	483.101
1613	ENSG00000153786	ZDHHC7	65.1286	0.544124	0.547986	0.992953	0.320733	0.623451	48.0912	53.8037	68.5599	96.3823	58.8058
1614	ENSG00000183386	FHL3	75.5571	0.63127	0.635931	0.992671	0.320871	0.623451	60.8501	52.3878	134.483	100.29	29.7751
1615	ENSG00000134851	TMEM165	117.396	0.446719	0.450805	0.990935	0.321717	0.624709	88.3308	104.068	116.024	170.623	107.935
1616	ENSG00000117592	PRDX6	212.507	0.401587	0.405607	0.990088	0.322131	0.625126	160.958	194.684	214.909	323.011	168.974
1617	ENSG00000035403	VCL	429.671	0.317607	0.321432	0.988101	0.323103	0.625616	408.284	341.229	391.582	467.585	539.674
1618	ENSG00000089157	RPLP0	374.335	-0.494642	0.500372	-0.988549	0.322884	0.625616	441.654	466.534	225.457	132.851	605.179
1619	ENSG00000089685	BIRC5	78.7424	-0.599116	0.607194	-0.986696	0.323792	0.625616	76.5533	121.058	105.477	27.3517	63.2721
1620	ENSG00000089916	GPATCH2L	81.8826	0.511009	0.517458	0.987536	0.32338	0.625616	79.4977	50.9719	93.6106	114.617	70.7159
1621	ENSG00000125686	MED1	351.029	0.354342	0.35926	0.986313	0.32398	0.625616	301.306	299.46	412.678	476.702	264.998
1622	ENSG00000135541	AHI1	76.1398	-0.554277	0.561666	-0.986844	0.323719	0.625616	108.941	79.2896	97.566	39.0739	55.8283
1623	ENSG00000139289	PHLDA1	108.957	0.565532	0.573352	0.986362	0.323956	0.625616	72.6275	96.9882	125.254	48.1912	201.726
1624	ENSG00000164405	UQCRQ	215.732	0.416456	0.42202	0.986815	0.323733	0.625616	156.051	203.888	175.355	192.765	350.602
1625	ENSG00000134825	TMEM258	80.4278	0.481371	0.488474	0.985459	0.324398	0.625654	67.7202	62.299	83.0629	98.9872	90.0697
1626	ENSG00000164754	RAD21	201.174	-0.37126	0.376644	-0.985706	0.324278	0.625654	200.216	265.479	152.941	196.672	190.561
1627	ENSG00000140262	TCF12	100.036	0.450895	0.457743	0.98504	0.324605	0.625667	77.5348	86.369	94.9291	128.944	112.401
1628	ENSG00000103888	CEMIP	92.8978	-0.522524	0.530946	-0.984138	0.325048	0.626136	122.682	105.484	46.1461	70.333	119.845
1629	ENSG00000169710	FASN	105.124	-0.432675	0.440027	-0.983292	0.325464	0.626552	128.57	120.35	92.2922	95.0799	89.3253
1630	ENSG00000113318	MSH3	77.0947	-0.538537	0.548523	-0.981796	0.3262	0.627201	98.1453	91.3246	97.566	40.3764	58.0615
1631	ENSG00000174574	AKIRIN1	136.871	-0.410976	0.418572	-0.981851	0.326173	0.627201	138.385	183.357	118.661	105.5	138.454
1632	ENSG00000067369	TP53BP1	283.505	0.432175	0.441436	0.97902	0.32757	0.627829	275.788	192.56	278.195	492.331	178.651
1633	ENSG00000111669	TPI1	458.8	0.309743	0.316588	0.97838	0.327887	0.627829	353.323	448.128	540.568	526.195	425.784
1634	ENSG00000131981	LGALS3	94.1982	-0.525607	0.536154	-0.980327	0.326925	0.627829	114.83	116.811	50.1015	61.2158	128.033
1635	ENSG00000135018	UBQLN1	74.043	0.50267	0.513822	0.978295	0.327928	0.627829	53.9799	64.4228	96.2475	67.7281	87.8366
1636	ENSG00000157216	SSBP3	113.205	-0.439541	0.448564	-0.979885	0.327143	0.627829	142.311	126.014	121.298	98.9872	77.4153
1637	ENSG00000165494	PCF11	87.77	-0.519138	0.530474	-0.978631	0.327762	0.627829	120.719	94.1564	40.8722	93.7774	89.3253
1638	ENSG00000169715	MT1E	106.459	0.706946	0.721496	0.979834	0.327168	0.627829	81.4606	73.6261	61.9676	28.6542	286.585
1639	ENSG00000148773	MKI67	373.237	-0.320714	0.328223	-0.977122	0.328509	0.628557	413.192	435.385	333.57	281.332	402.708
1640	ENSG00000137821	LRRC49	77.6479	0.593681	0.607973	0.976493	0.32882	0.628768	75.5719	43.1845	142.394	84.6601	42.4295
1641	ENSG00000117020	AKT3	117.231	0.47506	0.487613	0.974256	0.329929	0.629485	109.923	79.9976	98.8844	195.37	101.98
1642	ENSG00000123636	BAZ2B	224.316	0.399993	0.410395	0.974655	0.329732	0.629485	176.662	198.932	278.195	315.196	152.597
1643	ENSG00000196504	PRPF40A	608.639	0.287258	0.294563	0.975203	0.32946	0.629485	585.927	489.189	702.739	666.861	598.48
1644	ENSG00000210049	MT-TF	612.145	-0.341663	0.350741	-0.974118	0.329998	0.629485	942.195	460.163	541.887	562.664	553.817
1645	ENSG00000241839	PLEKHO2	112.636	0.541272	0.55599	0.97353	0.33029	0.629659	89.3122	87.077	118.661	212.302	55.8283
1646	ENSG00000108854	SMURF2	315.577	-0.328677	0.338797	-0.970129	0.331982	0.632151	344.49	375.21	275.558	240.956	341.669
1647	ENSG00000141367	CLTC	351.453	-0.354434	0.365361	-0.970092	0.332	0.632151	340.564	468.658	228.093	316.499	403.453
1648	ENSG00000138767	CNOT6L	67.7988	0.542265	0.559327	0.969495	0.332298	0.632334	62.813	43.8925	51.4199	98.9872	81.8815
1649	ENSG00000057608	GDI2	297.138	0.343609	0.355614	0.966241	0.333923	0.632812	227.697	283.177	396.856	320.406	257.555
1650	ENSG00000065978	YBX1	1288.12	0.275734	0.285291	0.9665	0.333794	0.632812	1137.5	1150.41	1119.37	1420.99	1612.32
1651	ENSG00000108819	PPP1R9B	103.517	0.508654	0.526467	0.966165	0.333962	0.632812	82.442	82.1214	156.897	138.061	58.0615
1652	ENSG00000149485	FADS1	218.356	-0.379733	0.392567	-0.967308	0.33339	0.632812	272.844	235.037	213.59	132.851	237.456
1653	ENSG00000162191	UBXN1	441.992	-0.319847	0.330989	-0.966336	0.333876	0.632812	531.947	471.49	338.844	511.868	355.812
1654	ENSG00000175727	MLXIP	84.8242	-0.511302	0.528084	-0.968221	0.332934	0.632812	99.1267	108.315	52.7384	56.0059	107.935
1655	ENSG00000213593	TMX2	119.821	-0.415818	0.430242	-0.966475	0.333807	0.632812	156.051	126.014	119.98	95.0799	101.98
1656	ENSG00000184840	TMED9	380.25	0.32282	0.334549	0.964942	0.334574	0.633589	342.527	318.574	502.333	326.918	410.896
1657	ENSG00000054793	ATP9A	67.171	0.563887	0.586566	0.961336	0.336383	0.633953	45.1468	58.7593	69.8783	115.919	46.1514
1658	ENSG00000066044	ELAVL1	64.3028	-0.545689	0.567387	-0.96176	0.33617	0.633953	73.609	84.9532	72.5153	33.8641	56.5727
1659	ENSG00000092108	SCFD1	103.782	0.453255	0.471026	0.962272	0.335913	0.633953	77.5348	92.0326	98.8844	153.691	96.7691
1660	ENSG00000102974	CTCF	320.583	0.350523	0.364601	0.961387	0.336357	0.633953	283.64	266.187	315.112	471.492	266.487
1661	ENSG00000139645	ANKRD52	112.424	0.474887	0.493816	0.96167	0.336216	0.633953	74.5904	106.899	131.846	170.623	78.1596
1662	ENSG00000152377	SPOCK1	108.013	-0.436533	0.453573	-0.962432	0.335833	0.633953	147.218	109.023	81.7445	112.012	90.0697
1663	ENSG00000164323	CFAP97	113.838	-0.473508	0.491179	-0.964023	0.335034	0.633953	151.144	123.182	55.3753	110.709	128.777
1664	ENSG00000241468	ATP5MF	119.912	0.430975	0.44721	0.963696	0.335199	0.633953	108.941	89.9088	98.8844	143.271	158.552
1665	ENSG00000091136	LAMB1	211.268	-0.41246	0.429364	-0.960631	0.336738	0.63424	230.641	266.894	108.114	190.16	260.532
1666	ENSG00000100554	ATP6V1D	122.983	0.437885	0.456496	0.959231	0.337442	0.634253	94.2195	108.315	187.221	101.592	123.567
1667	ENSG00000103342	GSPT1	489.571	0.299186	0.311916	0.959188	0.337464	0.634253	465.209	395.74	448.276	537.918	600.713
1668	ENSG00000108021	TASOR2	71.5966	-0.496283	0.51763	-0.95876	0.33768	0.634253	72.6275	100.528	65.923	63.8207	55.0839
1669	ENSG00000132670	PTPRA	103.539	0.452542	0.472082	0.958609	0.337756	0.634253	86.3678	82.8293	121.298	144.573	82.6259
1670	ENSG00000253368	TRNP1	319.185	0.333805	0.347942	0.959369	0.337373	0.634253	241.437	310.787	275.558	369.9	398.242
1671	ENSG00000104722	NEFM	102.55	-0.462234	0.482889	-0.957225	0.338454	0.634808	124.645	120.35	76.4706	125.037	66.2496
1672	ENSG00000235459	RPS26P31	104.366	-0.655813	0.685122	-0.95722	0.338456	0.634808	62.813	205.303	52.7384	31.2591	169.718
1673	ENSG00000102755	FLT1	125.585	0.476793	0.499171	0.955169	0.339492	0.63637	99.1267	104.776	72.5153	149.783	201.726
1674	ENSG00000205726	ITSN1	137.504	-0.610485	0.639411	-0.954762	0.339698	0.636376	176.662	171.322	25.0507	91.1725	223.313
1675	ENSG00000147123	NDUFB11	219.792	0.374162	0.392252	0.953881	0.340144	0.63683	159.977	212.383	290.061	263.098	173.44
1676	ENSG00000225921	NOL7	94.8131	-0.463571	0.486214	-0.95343	0.340372	0.636878	121.7	105.484	58.0122	105.5	83.3703
1677	ENSG00000173875	ZNF791	123.541	-0.406223	0.426384	-0.952717	0.340734	0.637174	130.533	159.287	93.6106	115.919	118.356
1678	ENSG00000109046	WSB1	139.957	-0.427747	0.449733	-0.951112	0.341547	0.637422	157.032	174.154	75.1522	149.783	143.665
1679	ENSG00000134874	DZIP1	112.804	-0.429984	0.45221	-0.950852	0.34168	0.637422	147.218	120.35	79.1076	93.7774	123.567
1680	ENSG00000163681	SLMAP	77.7216	0.495236	0.520456	0.951543	0.341329	0.637422	71.6461	53.0957	77.7891	114.617	71.4602
1681	ENSG00000168785	TSPAN5	255.669	-0.336336	0.353524	-0.951381	0.341411	0.637422	313.083	271.85	191.177	235.746	266.487
1682	ENSG00000102753	KPNA3	174.85	0.376945	0.396699	0.950205	0.342008	0.637656	151.144	145.836	204.361	145.876	227.035
1683	ENSG00000011028	MRC2	180.35	-0.376967	0.399508	-0.943579	0.345385	0.638025	254.196	164.951	162.17	138.061	182.373
1684	ENSG00000013374	NUB1	119.504	0.46044	0.48882	0.941942	0.346222	0.638025	66.7388	127.43	148.986	162.808	91.5584
1685	ENSG00000065243	PKN2	69.7941	-0.517126	0.547801	-0.944003	0.345168	0.638025	92.2566	78.5817	65.923	37.7715	74.4378
1686	ENSG00000067248	DHX29	163.624	0.374976	0.397096	0.944296	0.345019	0.638025	134.459	143.712	164.807	156.296	218.847
1687	ENSG00000108468	CBX1	108.708	-0.426431	0.450223	-0.947157	0.343559	0.638025	135.44	121.766	104.158	74.2404	107.935
1688	ENSG00000111897	SERINC1	244.53	0.371155	0.393503	0.943208	0.345575	0.638025	174.699	240.701	357.302	195.37	254.577
1689	ENSG00000114391	RPL24	226.739	-0.335925	0.354725	-0.947	0.343639	0.638025	267.937	250.612	181.947	203.184	230.013
1690	ENSG00000116497	S100PBP	80.2001	0.470333	0.499126	0.942313	0.346032	0.638025	70.6646	59.4672	102.84	95.0799	72.949
1691	ENSG00000118985	ELL2	74.8757	-0.527105	0.559873	-0.941473	0.346463	0.638025	103.053	80.7055	83.0629	33.8641	73.6934
1692	ENSG00000126749	EMG1	103.389	0.444978	0.472656	0.941442	0.346478	0.638025	61.8315	107.607	116.024	125.037	106.446
1693	ENSG00000127946	HIP1	121.447	-0.433696	0.457601	-0.947761	0.343251	0.638025	117.774	169.906	127.891	75.5429	116.123
1694	ENSG00000130254	SAFB2	109.319	-0.481213	0.510194	-0.943196	0.34558	0.638025	133.478	130.262	47.4645	128.944	106.446
1695	ENSG00000134283	PPHLN1	71.6059	-0.507327	0.535262	-0.94781	0.343226	0.638025	69.6832	104.776	54.0568	52.0986	77.4153
1696	ENSG00000136738	STAM	81.831	-0.555407	0.588266	-0.944143	0.345096	0.638025	115.811	87.7849	40.8722	45.5862	119.1
1697	ENSG00000136930	PSMB7	197.73	-0.432007	0.458512	-0.942195	0.346093	0.638025	252.233	217.338	130.527	109.407	279.142
1698	ENSG00000143256	PFDN2	147.915	0.3877	0.408512	0.949053	0.342593	0.638025	110.904	138.757	135.801	173.228	180.884
1699	ENSG00000146007	ZMAT2	588.439	-0.311492	0.330568	-0.942293	0.346042	0.638025	715.479	615.91	487.83	704.633	418.34
1700	ENSG00000160075	SSU72	131.456	0.397264	0.42005	0.945753	0.344274	0.638025	105.015	116.103	122.617	144.573	168.974
1701	ENSG00000166747	AP1G1	81.1508	0.55123	0.581734	0.947564	0.343351	0.638025	52.9985	73.6261	47.4645	149.783	81.8815
1702	ENSG00000172380	GNG12	163.578	0.404466	0.426241	0.948913	0.342665	0.638025	141.329	133.093	117.343	205.789	220.336
1703	ENSG00000182054	IDH2	98.0021	0.560006	0.593166	0.944097	0.34512	0.638025	59.8686	92.0326	93.6106	195.37	49.1289
1704	ENSG00000148700	ADD3	95.2822	-0.438702	0.467457	-0.938487	0.347994	0.64044	122.682	103.36	100.203	74.2404	75.9265
1705	ENSG00000165476	REEP3	163.475	0.389051	0.415018	0.937434	0.348536	0.64106	135.44	140.881	163.489	139.364	238.201
1706	ENSG00000133104	SPART	157.787	-0.387309	0.41338	-0.936932	0.348793	0.641158	188.439	179.818	134.483	106.802	179.395
1707	ENSG00000135486	HNRNPA1	225.454	-0.342891	0.366858	-0.934669	0.349959	0.642924	273.825	242.824	238.641	162.808	209.17
1708	ENSG00000114999	TTL	120.743	-0.400117	0.429317	-0.931985	0.351344	0.645091	158.995	123.89	94.9291	112.012	113.89
1709	ENSG00000005700	IBTK	88.5985	-0.470546	0.505289	-0.931242	0.351728	0.645178	107.96	105.484	55.3753	67.7281	106.446
1710	ENSG00000125995	ROMO1	188.977	0.40236	0.432135	0.931098	0.351803	0.645178	112.867	203.888	147.667	221.419	259.043
1711	ENSG00000175334	BANF1	83.8886	0.63539	0.683125	0.930123	0.352308	0.645726	67.7202	58.7593	21.0953	102.895	168.974
1712	ENSG00000015171	ZMYND11	338.892	0.303718	0.326756	0.929496	0.352632	0.645943	320.935	273.266	413.996	349.06	337.203
1713	ENSG00000108424	KPNB1	826.12	0.265914	0.286488	0.928185	0.353312	0.646176	660.518	812.011	904.463	953.404	800.206
1714	ENSG00000117360	PRPF3	87.5204	0.49092	0.529429	0.927264	0.35379	0.646176	43.1839	96.9882	98.8844	115.919	82.6259
1715	ENSG00000129315	CCNT1	88.2592	-0.531356	0.572759	-0.927713	0.353557	0.646176	117.774	98.4041	43.5092	130.246	51.3621
1716	ENSG00000185129	PURA	373.06	0.427862	0.460963	0.928191	0.353309	0.646176	345.471	273.974	247.87	261.795	736.189
1717	ENSG00000204228	HSD17B8	65.0664	0.623449	0.672073	0.92765	0.353589	0.646176	53.9799	43.8925	98.8844	105.5	23.0757
1718	ENSG00000117614	SYF2	221.283	-0.35975	0.388391	-0.926255	0.354313	0.646624	287.566	222.294	168.763	261.795	165.996
1719	ENSG00000142541	RPL13A	1246.07	-0.325798	0.351835	-0.925997	0.354447	0.646624	1041.32	1795.34	1135.19	780.176	1478.33
1720	ENSG00000089048	ESF1	204.894	-0.378244	0.409491	-0.923691	0.355647	0.648436	263.029	213.799	154.26	138.061	255.322
1721	ENSG00000140553	UNC45A	137.351	0.456873	0.494996	0.922984	0.356015	0.64873	70.6646	152.916	156.897	205.789	100.491
1722	ENSG00000084093	REST	143.621	-0.408123	0.442663	-0.921973	0.356543	0.649314	153.107	184.773	97.566	105.5	177.162
1723	ENSG00000231500	RPS18	194.199	0.387091	0.420868	0.919744	0.357706	0.651055	202.179	126.722	163.489	192.765	285.841
1724	ENSG00000091656	ZFHX4	577.419	0.432502	0.470761	0.91873	0.358237	0.651642	503.485	450.252	713.286	998.99	221.08
1725	ENSG00000172379	ARNT2	90.9589	0.558119	0.608536	0.91715	0.359064	0.652448	88.3308	53.0957	155.578	119.827	37.9633
1726	ENSG00000183696	UPP1	82.561	0.614694	0.670266	0.917089	0.359096	0.652448	59.8686	65.8387	89.6552	24.7468	172.696
1727	ENSG00000177119	ANO6	76.5621	-0.492231	0.537307	-0.916107	0.359611	0.653005	101.09	84.9532	52.7384	49.4936	94.536
1728	ENSG00000110955	ATP5F1B	75.3293	-0.56268	0.615665	-0.913937	0.36075	0.654198	112.867	75.042	50.1015	29.9567	108.679
1729	ENSG00000144747	TMF1	121.331	-0.425304	0.465406	-0.913834	0.360804	0.654198	109.923	176.986	81.7445	100.29	137.71
1730	ENSG00000160714	UBE2Q1	87.7668	0.49207	0.538569	0.913664	0.360894	0.654198	56.9243	83.5373	100.203	139.364	58.8058
1731	ENSG00000172638	EFEMP2	109.574	-0.442128	0.484188	-0.913133	0.361172	0.654325	126.607	134.509	92.2922	61.2158	133.244
1732	ENSG00000108671	PSMD11	173.383	-0.367995	0.403621	-0.911733	0.361909	0.654903	156.051	244.24	148.986	178.438	139.199
1733	ENSG00000168137	SETD5	288.986	-0.322936	0.354082	-0.912038	0.361749	0.654903	336.638	321.406	226.775	226.629	333.481
1734	ENSG00000104408	EIF3E	64.3345	-0.543687	0.597507	-0.909926	0.362861	0.656248	73.609	85.6611	42.1907	33.8641	86.3478
1735	ENSG00000159202	UBE2Z	260.979	0.328587	0.361448	0.909084	0.363306	0.656672	257.141	195.392	257.1	345.153	250.111
1736	ENSG00000105193	RPS16	395.29	0.298929	0.328996	0.90861	0.363556	0.656747	348.416	346.892	413.996	349.06	518.087
1737	ENSG00000102081	FMR1	198.729	0.391772	0.432047	0.906782	0.364522	0.657867	164.884	169.198	209.635	315.196	134.732
1738	ENSG00000160310	PRMT2	287.673	0.334671	0.369132	0.906642	0.364596	0.657867	214.938	281.761	271.603	410.276	259.788
1739	ENSG00000129071	MBD4	71.0982	-0.488992	0.540047	-0.905462	0.365221	0.658237	95.2009	77.1658	63.286	41.6788	78.1596
1740	ENSG00000136381	IREB2	89.6508	0.460169	0.508136	0.905601	0.365147	0.658237	57.9057	87.7849	108.114	123.734	70.7159
1741	ENSG00000025796	SEC63	219.575	-0.426905	0.471752	-0.904937	0.365499	0.65836	266.955	253.444	127.891	119.827	329.759
1742	ENSG00000047249	ATP6V1H	92.4526	0.629105	0.695565	0.904452	0.365756	0.658444	68.7017	70.0864	68.5599	226.629	28.2863
1743	ENSG00000276168	RN7SL1	168.087	0.453547	0.501756	0.903919	0.366039	0.658575	211.994	63.7149	229.412	169.32	165.996
1744	ENSG00000106261	ZKSCAN1	335.619	-0.341452	0.378249	-0.902717	0.366676	0.658692	354.304	414.147	192.495	398.554	318.594
1745	ENSG00000169083	AR	86.6925	-0.449474	0.49757	-0.90334	0.366346	0.658692	115.811	90.6167	63.286	98.9872	64.7609
1746	ENSG00000221978	CCNL2	73.9687	-0.489202	0.542224	-0.902213	0.366944	0.658692	80.4791	98.4041	80.426	39.0739	71.4602
1747	ENSG00000266412	NCOA4	88.5119	-0.491722	0.544887	-0.902429	0.366829	0.658692	86.3678	128.138	39.5538	87.2651	101.235
1748	ENSG00000139641	ESYT1	79.4468	0.452104	0.501504	0.901497	0.367324	0.658998	64.7759	65.1308	87.0183	108.104	72.2046
1749	ENSG00000105849	POLR1F	140.061	-0.381689	0.423639	-0.900977	0.367601	0.659117	164.884	159.995	147.667	135.456	92.3028
1750	ENSG00000172939	OXSR1	70.8683	-0.489848	0.544112	-0.900271	0.367976	0.659413	73.609	97.6961	40.8722	78.1478	64.0165
1751	ENSG00000114850	SSR3	316.607	-0.291642	0.324408	-0.899	0.368653	0.659872	346.453	364.591	279.513	317.801	274.675
1752	ENSG00000169607	CKAP2L	98.3674	0.420471	0.467648	0.89912	0.368589	0.659872	76.5533	87.077	119.98	84.6601	123.567
1753	ENSG00000012983	MAP4K5	246.781	0.387771	0.43229	0.897018	0.369709	0.660159	182.55	232.913	315.112	358.178	145.154
1754	ENSG00000062650	WAPL	145.854	0.392231	0.437535	0.896455	0.37001	0.660159	124.645	121.058	210.953	108.104	164.507
1755	ENSG00000100731	PCNX1	66.6655	-0.486476	0.542742	-0.896331	0.370076	0.660159	90.2937	70.7943	71.1968	42.9813	58.0615
1756	ENSG00000108829	LRRC59	113.353	-0.444567	0.495349	-0.897482	0.369462	0.660159	102.071	167.075	68.5599	141.969	87.0922
1757	ENSG00000108946	PRKAR1A	117.13	-0.461414	0.514266	-0.89723	0.369596	0.660159	147.218	133.801	47.4645	117.222	139.943
1758	ENSG00000159200	RCAN1	206.734	-0.344487	0.383837	-0.897482	0.369462	0.660159	292.473	181.941	176.674	187.555	195.027
1759	ENSG00000075336	TIMM21	64.1415	-0.513499	0.57341	-0.895518	0.37051	0.660209	91.2751	65.1308	76.4706	36.469	51.3621
1760	ENSG00000198833	UBE2J1	92.34	0.452307	0.505094	0.89549	0.370525	0.660209	80.4791	70.7943	142.394	69.0306	99.0022
1761	ENSG00000122218	COPA	294.724	-0.314202	0.351383	-0.894188	0.371221	0.661073	383.748	283.885	315.112	263.098	227.78
1762	ENSG00000104131	EIF3J	228.045	-0.354357	0.397083	-0.8924	0.372179	0.662402	320.935	204.596	221.501	149.783	243.411
1763	ENSG00000083520	DIS3	67.993	-0.542011	0.607728	-0.891866	0.372465	0.662536	64.7759	103.36	36.9169	40.3764	94.536
1764	ENSG00000101150	TPD52L2	87.9537	0.528866	0.593921	0.890465	0.373216	0.663495	66.7388	72.9181	58.0122	61.2158	180.884
1765	ENSG00000105197	TIMM50	92.6465	-0.445714	0.501004	-0.889642	0.373658	0.663529	91.2751	129.554	56.6938	80.7528	104.957
1766	ENSG00000154305	MIA3	99.6033	-0.415744	0.467207	-0.889849	0.373547	0.663529	123.663	110.439	81.7445	110.709	71.4602
1767	ENSG00000067208	EVI5	147.416	0.36494	0.412333	0.88506	0.376124	0.664436	151.144	100.528	163.489	169.32	152.597
1768	ENSG00000075151	EIF4G3	216.592	-0.31991	0.3614	-0.885196	0.376051	0.664436	250.27	242.116	196.45	169.32	224.802
1769	ENSG00000083168	KAT6A	157.116	-0.358976	0.405564	-0.885127	0.376088	0.664436	186.476	176.278	112.069	138.061	172.696
1770	ENSG00000088930	XRN2	590.859	0.295328	0.333795	0.884756	0.376288	0.664436	540.781	498.392	664.504	801.015	449.604
1771	ENSG00000111328	CDK2AP1	338.048	0.379388	0.428804	0.884759	0.376286	0.664436	307.195	264.771	382.353	548.337	187.583
1772	ENSG00000111817	DSE	103.155	-0.399714	0.451585	-0.885135	0.376084	0.664436	105.997	135.217	100.203	82.0552	92.3028
1773	ENSG00000174851	YIF1A	241.125	-0.327432	0.36991	-0.885167	0.376066	0.664436	229.66	318.574	229.412	250.073	177.906
1774	ENSG00000178105	DDX10	155.974	0.424385	0.478252	0.887367	0.374881	0.664436	137.403	121.058	125.254	280.03	116.123
1775	ENSG00000185567	AHNAK2	286.783	-0.394301	0.444697	-0.886673	0.375255	0.664436	381.785	289.549	170.081	171.925	420.573
1776	ENSG00000198931	APRT	164.336	0.417334	0.470787	0.886461	0.375369	0.664436	138.385	134.509	204.361	251.376	93.0472
1777	ENSG00000073614	KDM5A	256.633	-0.333144	0.377062	-0.883526	0.376952	0.665234	338.601	247.072	191.177	300.869	205.448
1778	ENSG00000083845	RPS5	857.697	-0.248702	0.281667	-0.882966	0.377255	0.665317	854.845	1039.97	843.814	801.015	748.844
1779	ENSG00000124762	CDKN1A	550.078	0.299119	0.339037	0.882261	0.377635	0.665317	379.822	585.469	636.816	689.003	459.281
1780	ENSG00000152795	HNRNPDL	487.439	0.266193	0.30166	0.882426	0.377546	0.665317	391.6	477.154	537.931	523.59	506.921
1781	ENSG00000099250	NRP1	181.747	0.366391	0.415805	0.881159	0.378232	0.665994	140.348	169.906	142.394	188.857	267.232
1782	ENSG00000090889	KIF4A	74.6672	-0.453705	0.516439	-0.878526	0.379658	0.667756	95.2009	82.8293	55.3753	83.3577	56.5727
1783	ENSG00000147044	CASK	71.4204	-0.449335	0.511326	-0.878764	0.379529	0.667756	95.2009	75.042	64.6045	61.2158	61.039
1784	ENSG00000134287	ARF3	214.548	0.350051	0.398939	0.877454	0.38024	0.668404	156.051	211.675	197.769	315.196	192.049
1785	ENSG00000101363	MANBAL	95.2118	-0.473816	0.54136	-0.875232	0.381448	0.670151	81.4606	147.96	52.7384	70.333	123.567
1786	ENSG00000112531	QKI	134.036	-0.388246	0.444157	-0.874118	0.382054	0.67084	168.81	144.42	96.2475	97.6848	163.019
1787	ENSG00000130726	TRIM28	145.411	0.356317	0.408452	0.872359	0.383012	0.671897	125.626	123.182	141.075	192.765	144.409
1788	ENSG00000159720	ATP6V0D1	80.016	-0.474501	0.544176	-0.871963	0.383229	0.671897	66.7388	125.306	92.2922	49.4936	66.2496
1789	ENSG00000205339	IPO7	190.541	-0.384795	0.441362	-0.871835	0.383298	0.671897	173.717	270.434	122.617	138.061	247.878
1790	ENSG00000068366	ACSL4	113.804	0.381187	0.437614	0.871058	0.383722	0.672265	97.1638	95.5723	141.075	104.197	131.01
1791	ENSG00000109689	STIM2	64.9304	-0.473588	0.544253	-0.870161	0.384212	0.672747	96.1824	60.1752	52.7384	56.0059	59.5502
1792	ENSG00000196141	SPATS2L	331.692	0.296672	0.341399	0.868989	0.384853	0.673493	303.269	279.637	417.952	377.715	279.886
1793	ENSG00000169692	AGPAT2	72.7653	0.459596	0.531281	0.865073	0.386999	0.676871	53.9799	64.4228	106.795	76.8454	61.7833
1794	ENSG00000213741	RPS29	157.891	-1.08183	1.25224	-0.863913	0.387636	0.677607	209.049	253.444	61.9676	15.6296	249.366
1795	ENSG00000133789	SWAP70	160.445	-0.388331	0.449823	-0.863298	0.387974	0.677687	167.828	206.719	143.712	85.9626	198.004
1796	ENSG00000198431	TXNRD1	497.155	-0.357926	0.414726	-0.863042	0.388114	0.677687	551.576	595.38	303.246	295.659	739.911
1797	ENSG00000143222	UFC1	74.1521	0.453379	0.526338	0.861384	0.389027	0.678902	68.7017	53.0957	60.6491	88.5675	99.7466
1798	ENSG00000145349	CAMK2D	179.07	0.338565	0.393264	0.860911	0.389287	0.678933	165.866	143.004	181.947	242.258	162.274
1799	ENSG00000151233	GXYLT1	96.0799	0.405733	0.47185	0.859877	0.389857	0.678933	89.3122	71.5022	130.527	93.7774	95.2803
1800	ENSG00000163468	CCT3	656.828	0.29641	0.344908	0.859388	0.390127	0.678933	480.912	673.254	874.139	769.756	486.079
1801	ENSG00000188529	SRSF10	287.021	0.307547	0.357773	0.859616	0.390001	0.678933	256.159	245.656	317.749	380.319	235.223
1802	ENSG00000196405	EVL	124.664	0.500264	0.581544	0.860234	0.38966	0.678933	94.2195	104.776	145.031	233.141	46.1514
1803	ENSG00000038382	TRIO	220.707	-0.347845	0.405898	-0.856976	0.391458	0.679593	261.066	246.364	206.998	126.339	262.765
1804	ENSG00000063245	EPN1	579.579	0.338924	0.395961	0.855955	0.392023	0.679593	488.764	510.427	631.542	929.959	337.203
1805	ENSG00000104164	BLOC1S6	146.362	-0.406296	0.474283	-0.856654	0.391636	0.679593	156.051	186.897	196.45	75.5429	116.867
1806	ENSG00000117505	DR1	70.3514	0.578108	0.675199	0.856205	0.391885	0.679593	73.609	35.3971	116.024	24.7468	101.98
1807	ENSG00000136108	CKAP2	70.9013	0.450371	0.525406	0.857185	0.391342	0.679593	57.9057	58.0513	92.2922	85.9626	60.2946
1808	ENSG00000150776	NKAPD1	64.7266	-0.466605	0.544652	-0.856702	0.39161	0.679593	74.5904	80.7055	40.8722	66.4257	61.039
1809	ENSG00000197343	ZNF655	72.9766	0.491218	0.572368	0.858221	0.39077	0.679593	81.4606	36.1051	109.432	71.6355	66.2496
1810	ENSG00000134910	STT3A	79.601	-0.463274	0.543193	-0.852873	0.39373	0.681798	112.867	78.5817	61.9676	45.5862	99.0022
1811	ENSG00000151366	NDUFC2	102.35	0.411941	0.482988	0.852901	0.393714	0.681798	69.6832	101.236	117.343	82.0552	141.432
1812	ENSG00000204256	BRD2	588.45	0.280045	0.328857	0.851572	0.394452	0.682672	556.484	485.649	762.069	682.491	455.559
1813	ENSG00000135521	LTV1	71.5525	0.495982	0.584971	0.847874	0.396508	0.685342	52.9985	62.299	46.1461	69.0306	127.289
1814	ENSG00000148737	TCF7L2	204.265	0.332633	0.392432	0.847619	0.39665	0.685342	209.049	144.42	217.546	270.912	179.395
1815	ENSG00000198740	ZNF652	80.1168	-0.421088	0.496427	-0.848237	0.396306	0.685342	96.1824	92.7405	84.3814	57.3084	69.9715
1816	ENSG00000107560	RAB11FIP2	65.3817	0.468221	0.553149	0.846465	0.397294	0.685698	57.9057	48.8481	63.286	58.6109	98.2578
1817	ENSG00000183049	CAMK1D	144.437	0.466121	0.550463	0.84678	0.397118	0.685698	130.533	104.068	129.209	289.147	69.2271
1818	ENSG00000122565	CBX3	243.749	-0.444492	0.525602	-0.845682	0.39773	0.686074	284.621	296.628	135.801	93.7774	407.919
1819	ENSG00000124177	CHD6	132.241	-0.360041	0.426091	-0.844986	0.398118	0.686366	152.125	152.208	121.298	143.271	92.3028
1820	ENSG00000114251	WNT5A	65.0781	0.483741	0.572938	0.844317	0.398492	0.686633	42.2025	63.0069	50.1015	70.333	99.7466
1821	ENSG00000089597	GANAB	115.596	-0.459136	0.544399	-0.843382	0.399015	0.687155	113.849	163.535	67.2414	59.9133	173.44
1822	ENSG00000169756	LIMS1	428.439	-0.374685	0.444614	-0.842719	0.399386	0.687417	431.839	562.815	212.272	278.727	656.541
1823	ENSG00000127526	SLC35E1	100.321	-0.383312	0.455882	-0.840816	0.400451	0.687754	122.682	110.439	105.477	83.3577	79.6484
1824	ENSG00000141756	FKBP10	218.273	-0.298593	0.355342	-0.840297	0.400742	0.687754	249.289	242.824	191.177	186.252	221.825
1825	ENSG00000152661	GJA1	237.449	0.363506	0.432735	0.84002	0.400897	0.687754	209.049	195.392	291.38	352.968	138.454
1826	ENSG00000166833	NAV2	176.974	-0.387112	0.460695	-0.840279	0.400752	0.687754	211.012	201.764	77.7891	194.067	200.238
1827	ENSG00000196712	NF1	214.027	0.320315	0.380489	0.841849	0.399872	0.687754	221.808	150.792	225.457	269.61	202.471
1828	ENSG00000210196	MT-TP	367.706	-0.30665	0.364617	-0.84102	0.400337	0.687754	497.597	332.733	403.449	362.085	242.667
1829	ENSG00000162613	FUBP1	340.589	0.340625	0.406155	0.838659	0.40166	0.687979	271.862	316.451	276.876	263.098	574.66
1830	ENSG00000198700	IPO9	157.951	-0.356763	0.425421	-0.838612	0.401687	0.687979	213.957	149.376	179.31	140.666	106.446
1831	ENSG00000213064	SFT2D2	73.5649	0.432889	0.516079	0.838803	0.40158	0.687979	56.9243	64.4228	101.521	74.2404	70.7159
1832	ENSG00000116095	PLEKHA3	105.214	0.37544	0.448955	0.836253	0.403013	0.689873	98.1453	80.7055	122.617	100.29	124.311
1833	ENSG00000128989	ARPP19	114.466	0.396303	0.47448	0.835235	0.403585	0.6901	102.071	89.9088	139.757	160.203	80.3928
1834	ENSG00000146731	CCT6A	324.323	0.287742	0.3444	0.835489	0.403443	0.6901	310.139	263.355	363.895	274.82	409.408
1835	ENSG00000077942	FBLN1	371.134	0.321634	0.385539	0.834245	0.404143	0.690189	344.49	302.292	300.609	311.289	596.991
1836	ENSG00000102144	PGK1	141.605	0.390795	0.469254	0.8328	0.404958	0.690189	110.904	128.138	174.037	87.2651	207.681
1837	ENSG00000123384	LRP1	103.21	0.439806	0.527696	0.833446	0.404593	0.690189	104.034	65.8387	98.8844	175.833	71.4602
1838	ENSG00000128731	HERC2	91.597	-0.446814	0.536335	-0.833088	0.404795	0.690189	94.2195	123.182	60.6491	126.339	53.5952
1839	ENSG00000163939	PBRM1	194.077	0.309129	0.370659	0.833999	0.404282	0.690189	175.68	163.535	230.73	218.814	181.628
1840	ENSG00000171634	BPTF	411.184	-0.278355	0.333927	-0.833582	0.404517	0.690189	549.614	370.254	403.449	326.918	405.686
1841	ENSG00000088325	TPX2	331.423	-0.267385	0.321225	-0.832391	0.405188	0.690206	379.822	358.219	279.513	316.499	323.06
1842	ENSG00000118260	CREB1	65.7501	0.495836	0.596225	0.831626	0.40562	0.690567	61.8315	43.8925	39.5538	106.802	76.6709
1843	ENSG00000125977	EIF2S2	457.563	-0.288521	0.347347	-0.830642	0.406176	0.691138	533.91	494.144	399.493	303.474	556.794
1844	ENSG00000055044	NOP58	99.8406	-0.428467	0.516304	-0.829874	0.40661	0.691501	111.886	124.598	105.477	45.5862	111.657
1845	ENSG00000158545	ZC3H18	85.5105	-0.426165	0.51401	-0.829099	0.407049	0.691872	124.645	77.1658	94.9291	74.2404	56.5727
1846	ENSG00000115808	STRN	65.0729	0.476466	0.575996	0.827204	0.408122	0.69332	65.7573	39.6448	63.286	101.592	55.0839
1847	ENSG00000162614	NEXN	633.879	-0.242046	0.292749	-0.826803	0.408349	0.693331	682.11	715.73	530.021	573.084	668.451
1848	ENSG00000137177	KIF13A	71.3903	-0.633355	0.768316	-0.824343	0.409745	0.693922	109.923	72.2102	68.5599	6.51232	99.7466
1849	ENSG00000142546	NOSIP	95.825	0.381939	0.462601	0.825635	0.409011	0.693922	78.5162	83.5373	122.617	92.4749	101.98
1850	ENSG00000143322	ABL2	332.562	-0.273101	0.331337	-0.824239	0.409804	0.693922	392.581	349.724	336.207	255.283	329.015
1851	ENSG00000168591	TMUB2	70.2723	-0.458653	0.555937	-0.825009	0.409366	0.693922	64.7759	102.652	84.3814	53.401	46.1514
1852	ENSG00000214612	RPS19P1	104.346	-0.376492	0.456234	-0.825217	0.409248	0.693922	105.015	136.633	110.751	85.9626	83.3703
1853	ENSG00000157106	SMG1	172.538	-0.32266	0.391681	-0.823781	0.410064	0.693988	192.365	199.64	192.495	131.549	146.642
1854	ENSG00000082641	NFE2L1	106.555	-0.369452	0.44934	-0.82221	0.410958	0.694003	116.793	129.554	81.7445	114.617	90.0697
1855	ENSG00000112078	KCTD20	120.643	-0.432917	0.526517	-0.822228	0.410947	0.694003	152.125	133.801	155.578	45.5862	116.123
1856	ENSG00000135040	NAA35	90.1405	-0.446001	0.542299	-0.822426	0.410834	0.694003	118.756	96.2802	38.2353	97.6848	99.7466
1857	ENSG00000197265	GTF2E2	71.3284	-0.464981	0.565247	-0.822615	0.410727	0.694003	68.7017	101.944	39.5538	89.87	56.5727
1858	ENSG00000011405	PIK3C2A	121.497	-0.359013	0.437912	-0.81983	0.412313	0.695917	126.607	152.916	100.203	135.456	92.3028
1859	ENSG00000205352	PRR13	76.3089	-0.480582	0.587509	-0.818	0.413357	0.697304	96.1824	88.4929	30.3246	63.8207	102.724
1860	ENSG00000135318	NT5E	230.753	-0.289916	0.354877	-0.816949	0.413957	0.697421	242.419	275.39	241.278	191.462	203.215
1861	ENSG00000145425	RPS3A	70.0928	-0.485192	0.59408	-0.816711	0.414094	0.697421	81.4606	88.4929	31.643	52.0986	96.7691
1862	ENSG00000156508	EEF1A1	152.805	-0.330621	0.404694	-0.816967	0.413948	0.697421	205.124	143.712	142.394	127.641	145.154
1863	ENSG00000177663	IL17RA	143.37	-0.339399	0.415966	-0.81593	0.41454	0.697798	188.439	140.173	129.209	109.407	149.62
1864	ENSG00000102898	NUTF2	204.364	0.299561	0.367837	0.814385	0.415424	0.697837	187.457	172.03	191.177	218.814	252.344
1865	ENSG00000105185	PDCD5	68.1253	0.510867	0.62788	0.813639	0.415852	0.697837	22.5734	85.6611	75.1522	66.4257	90.8141
1866	ENSG00000129116	PALLD	495.204	-0.253465	0.31148	-0.813746	0.41579	0.697837	590.835	505.471	411.359	541.825	426.528
1867	ENSG00000183495	EP400	128.709	-0.349671	0.429002	-0.815079	0.415027	0.697837	125.626	169.906	96.2475	128.944	122.822
1868	ENSG00000197961	ZNF121	72.7131	-0.488952	0.601005	-0.813557	0.415899	0.697837	76.5533	99.112	27.6876	97.6848	62.5277
1869	ENSG00000234745	HLA-B	77.7827	-0.505311	0.620379	-0.81452	0.415347	0.697837	105.015	84.9532	63.286	24.7468	110.912
1870	ENSG00000113845	TIMMDC1	192.359	-0.328234	0.40375	-0.812965	0.416238	0.698033	263.029	174.862	208.317	182.345	133.244
1871	ENSG00000142534	RPS11	1098.58	0.221817	0.272987	0.812557	0.416472	0.698053	936.306	1061.21	1270.99	1096.67	1127.73
1872	ENSG00000091039	OSBPL8	203.189	0.348366	0.429542	0.811018	0.417355	0.699127	199.235	150.792	133.164	235.746	297.007
1873	ENSG00000158109	TPRG1L	126.847	0.366606	0.452663	0.809888	0.418005	0.699127	105.015	111.147	180.629	93.7774	143.665
1874	ENSG00000158615	PPP1R15B	83.3546	0.426935	0.526802	0.810427	0.417695	0.699127	53.9799	83.5373	104.158	113.314	61.7833
1875	ENSG00000224877	NDUFAF8	213.993	0.300986	0.37155	0.810081	0.417893	0.699127	164.884	210.967	203.043	220.116	270.953
1876	ENSG00000143033	MTF2	114.307	0.378112	0.468332	0.807359	0.41946	0.701186	91.2751	101.944	125.254	166.715	86.3478
1877	ENSG00000140988	RPS2	118.224	-0.54631	0.678612	-0.80504	0.420797	0.702308	107.96	184.773	38.2353	39.0739	221.08
1878	ENSG00000162458	FBLIM1	125.665	-0.370531	0.46027	-0.80503	0.420803	0.702308	166.847	124.598	129.209	72.938	134.732
1879	ENSG00000197958	RPL12	650.439	0.252511	0.313593	0.805219	0.420693	0.702308	504.467	662.635	560.345	721.565	803.183
1880	ENSG00000266472	MRPS21	125.051	-0.342126	0.425695	-0.803688	0.421577	0.703226	133.478	152.916	93.6106	127.641	117.612
1881	ENSG00000147324	MFHAS1	301.623	-0.266069	0.331501	-0.80262	0.422195	0.703882	365.1	305.831	294.016	287.844	255.322
1882	ENSG00000178719	GRINA	280.93	0.32028	0.399579	0.801544	0.422817	0.704545	251.252	238.577	188.54	303.474	422.806
1883	ENSG00000102359	SRPX2	106.973	0.453657	0.567964	0.798743	0.42444	0.706874	90.2937	84.2452	130.527	183.647	46.1514
1884	ENSG00000109919	MTCH2	290.062	0.304735	0.382238	0.797239	0.425312	0.707575	225.734	281.761	290.061	427.208	225.546
1885	ENSG00000197102	DYNC1H1	1501.31	-0.264613	0.33189	-0.79729	0.425283	0.707575	1650.8	1689.15	1124.65	1048.48	1993.44
1886	ENSG00000148450	MSRB2	154.821	0.309529	0.388675	0.79637	0.425817	0.708039	135.44	135.217	177.992	165.413	160.041
1887	ENSG00000137522	RNF121	68.6872	0.452996	0.56927	0.795749	0.426178	0.708264	67.7202	44.6004	77.7891	104.197	49.1289
1888	ENSG00000170348	TMED10	160.662	-0.357989	0.450219	-0.795144	0.426529	0.708473	231.623	139.465	150.304	95.0799	186.839
1889	ENSG00000214548	MEG3	180.231	0.300652	0.37848	0.794368	0.426981	0.708847	169.791	146.544	213.59	199.277	171.951
1890	ENSG00000006451	RALA	350.695	-0.254972	0.32132	-0.793515	0.427478	0.70889	357.249	419.102	325.659	352.968	298.495
1891	ENSG00000024422	EHD2	367.044	-0.297934	0.375848	-0.792699	0.427953	0.70889	267.937	557.859	334.889	358.178	316.36
1892	ENSG00000183283	DAZAP2	111.73	0.392678	0.495139	0.793066	0.427739	0.70889	58.8872	128.846	97.566	144.573	128.777
1893	ENSG00000186575	NF2	122.456	-0.334675	0.422325	-0.792459	0.428093	0.70889	141.329	138.049	123.935	110.709	98.2578
1894	ENSG00000241352	0	316.484	0.281989	0.355875	0.792383	0.428137	0.70889	252.233	307.247	421.907	341.246	259.788
1895	ENSG00000119280	C1orf198	127.93	0.400028	0.505484	0.791376	0.428725	0.709489	86.3678	128.846	90.9737	109.407	224.058
1896	ENSG00000075213	SEMA3A	430.952	0.271644	0.343464	0.790895	0.429005	0.709579	364.119	402.82	526.065	324.313	537.441
1897	ENSG00000125691	RPL23	1664.45	0.229847	0.29078	0.79045	0.429265	0.709633	1563.45	1451.99	2023.84	1939.37	1343.6
1898	ENSG00000117713	ARID1A	75.2286	-0.467839	0.592224	-0.78997	0.429545	0.709723	81.4606	99.112	92.2922	27.3517	75.9265
1899	ENSG00000104442	ARMC1	84.7559	-0.420263	0.532384	-0.789399	0.429879	0.7099	112.867	87.7849	47.4645	67.7281	107.935
1900	ENSG00000115977	AAK1	242.117	-0.276144	0.350043	-0.788885	0.430179	0.710023	283.64	256.983	206.998	255.283	207.681
1901	ENSG00000172965	MIR4435-2HG	74.6721	-0.427759	0.542521	-0.788466	0.430424	0.710053	105.015	72.2102	61.9676	45.5862	88.5809
1902	ENSG00000120805	ARL1	65.1021	0.437331	0.555046	0.787919	0.430744	0.710207	54.9614	52.3878	52.7384	97.6848	67.7384
1903	ENSG00000182670	TTC3	362.573	-0.257977	0.327598	-0.787482	0.431	0.710255	398.47	406.359	280.832	333.431	393.776
1904	ENSG00000103187	COTL1	95.065	-0.397489	0.506368	-0.784979	0.432466	0.711392	112.867	109.731	48.783	104.197	99.7466
1905	ENSG00000168090	COPS6	118.421	-0.358086	0.456528	-0.784368	0.432824	0.711392	113.849	159.287	79.1076	108.104	131.755
1906	ENSG00000177733	HNRNPA0	128.376	0.349599	0.445519	0.784701	0.432629	0.711392	78.5162	141.589	133.164	141.969	146.642
1907	ENSG00000198604	BAZ1A	199.165	-0.308382	0.392583	-0.785521	0.432148	0.711392	203.161	247.78	172.718	140.666	231.501
1908	ENSG00000211459	MT-RNR1	11196.9	0.244514	0.31114	0.785866	0.431946	0.711392	13299.7	6861.38	11465.3	11409.6	12948.4
1909	ENSG00000173726	TOMM20	64.9891	-0.454196	0.581924	-0.780508	0.435092	0.714745	62.813	92.7405	35.5984	53.401	80.3928
1910	ENSG00000197858	GPAA1	159.193	-0.303788	0.389665	-0.779614	0.435618	0.715235	169.791	189.729	130.527	145.876	160.041
1911	ENSG00000133112	TPT1	877.841	0.30893	0.397592	0.777003	0.437157	0.717191	708.609	828.293	693.51	597.831	1560.96
1912	ENSG00000134013	LOXL2	147.724	-0.336905	0.433699	-0.776816	0.437267	0.717191	163.903	174.154	87.0183	154.993	158.552
1913	ENSG00000168259	DNAJC7	144.319	-0.331293	0.427449	-0.775048	0.438312	0.718198	186.476	143.004	96.2475	158.901	136.965
1914	ENSG00000175745	NR2F1	150.107	-0.414677	0.535322	-0.774631	0.438558	0.718198	215.92	138.049	48.783	165.413	182.373
1915	ENSG00000184076	UQCR10	75.5907	-0.46094	0.595059	-0.774613	0.438568	0.718198	80.4791	101.236	39.5538	44.2838	112.401
1916	ENSG00000100632	ERH	73.8745	0.463583	0.598876	0.774088	0.438879	0.718332	60.8501	60.1752	55.3753	50.7961	142.176
1917	ENSG00000138080	EMILIN1	95.8144	0.363087	0.469803	0.77285	0.439611	0.718729	86.3678	77.1658	88.3368	128.944	98.2578
1918	ENSG00000187514	PTMA	4571.9	-0.266557	0.345051	-0.772515	0.439809	0.718729	5328.31	4847.29	3168.26	3073.81	6441.84
1919	ENSG00000213949	ITGA1	70.5956	0.430309	0.556916	0.772665	0.439721	0.718729	52.017	64.4228	64.6045	114.617	57.3171
1920	ENSG00000079332	SAR1A	399.799	0.273007	0.354119	0.770948	0.440738	0.718934	306.213	403.527	410.041	556.152	323.06
1921	ENSG00000124541	RRP36	66.4532	0.404055	0.524232	0.770757	0.440851	0.718934	51.0355	60.1752	76.4706	71.6355	72.949
1922	ENSG00000131374	TBC1D5	101.293	0.386843	0.501476	0.771409	0.440465	0.718934	62.813	107.607	152.941	93.7774	89.3253
1923	ENSG00000140682	TGFB1I1	194.485	-0.2898	0.375943	-0.770862	0.440789	0.718934	193.346	242.824	167.444	205.789	163.019
1924	ENSG00000196154	S100A4	429.87	-0.23597	0.306418	-0.770091	0.441246	0.719203	436.747	508.303	384.99	423.301	396.009
1925	ENSG00000038219	BOD1L1	249.907	-0.279324	0.364122	-0.767116	0.443012	0.719428	275.788	283.885	189.858	209.697	290.307
1926	ENSG00000067533	RRP15	104.872	-0.338742	0.442858	-0.764901	0.444331	0.719428	110.904	128.846	100.203	89.87	94.536
1927	ENSG00000099331	MYO9B	98.8778	-0.360701	0.469535	-0.768209	0.442363	0.719428	103.053	125.306	87.0183	70.333	108.679
1928	ENSG00000104142	VPS18	97.7276	-0.358682	0.46896	-0.764845	0.444364	0.719428	114.83	110.439	67.2414	106.802	89.3253
1929	ENSG00000108654	DDX5	632.154	-0.228918	0.299366	-0.764676	0.444465	0.719428	753.756	632.193	663.185	601.738	509.899
1930	ENSG00000112419	PHACTR2	124.072	-0.387847	0.507116	-0.76481	0.444385	0.719428	152.125	138.049	83.0629	67.7281	179.395
1931	ENSG00000124766	SOX4	307.68	0.300675	0.392965	0.765144	0.444186	0.719428	253.215	286.009	381.035	419.393	198.749
1932	ENSG00000126070	AGO3	85.0215	0.397942	0.519721	0.765683	0.443865	0.719428	66.7388	75.7499	135.801	71.6355	75.1821
1933	ENSG00000138095	LRPPRC	71.9047	-0.415782	0.543555	-0.764932	0.444312	0.719428	82.442	86.369	90.9737	52.0986	47.6402
1934	ENSG00000139842	CUL4A	70.1998	-0.4168	0.545224	-0.764456	0.444596	0.719428	73.609	92.0326	63.286	41.6788	80.3928
1935	ENSG00000147604	RPL7	560.858	-0.262726	0.342623	-0.766809	0.443195	0.719428	640.889	606.707	379.716	472.794	704.181
1936	ENSG00000164761	TNFRSF11B	318.93	0.253728	0.331774	0.764761	0.444414	0.719428	294.436	277.514	294.016	390.739	337.947
1937	ENSG00000166503	HDGFL3	183.103	-0.321836	0.42	-0.766276	0.443512	0.719428	218.864	198.224	162.17	110.709	225.546
1938	ENSG00000174748	RPL15	401.295	0.247682	0.322185	0.768758	0.442037	0.719428	315.046	406.359	446.958	375.11	463.003
1939	ENSG00000107890	ANKRD26	76.086	-0.429269	0.56277	-0.762778	0.445596	0.720303	114.83	65.1308	97.566	45.5862	57.3171
1940	ENSG00000185630	PBX1	125.609	-0.336752	0.441365	-0.762978	0.445477	0.720303	132.496	154.332	88.3368	147.178	105.702
1941	ENSG00000101152	DNAJC5	137.189	0.331603	0.435321	0.761745	0.446212	0.720928	101.09	136.633	150.304	113.314	184.606
1942	ENSG00000002586	CD99	110.281	-0.370465	0.486987	-0.760729	0.446819	0.721537	138.385	117.519	108.114	58.6109	128.777
1943	ENSG00000091436	MAP3K20	385.08	-0.255746	0.337373	-0.758052	0.44842	0.7228	454.413	399.28	421.907	270.912	378.888
1944	ENSG00000117751	PPP1R8	121.229	0.37167	0.489682	0.759002	0.447851	0.7228	86.3678	118.934	156.897	168.018	75.9265
1945	ENSG00000124831	LRRFIP1	822.946	-0.263961	0.348466	-0.757494	0.448754	0.7228	828.346	1002.45	566.938	621.275	1095.72
1946	ENSG00000174243	DDX23	90.3169	0.404459	0.533848	0.757631	0.448672	0.7228	92.2566	58.7593	127.891	114.617	58.0615
1947	ENSG00000204842	ATXN2	281.501	-0.26656	0.351494	-0.758364	0.448233	0.7228	360.193	266.187	243.915	303.474	233.735
1948	ENSG00000144021	CIAO1	112.213	-0.361825	0.478066	-0.756853	0.449138	0.723048	127.589	130.969	72.5153	145.876	84.1147
1949	ENSG00000145715	RASA1	78.7732	0.42907	0.567541	0.756016	0.44964	0.723484	60.8501	70.0864	76.4706	49.4936	136.965
1950	ENSG00000170004	CHD3	570.669	0.255373	0.33846	0.754513	0.450541	0.724563	476.986	544.408	756.796	653.837	421.318
1951	ENSG00000101421	CHMP4B	125.533	0.341985	0.453789	0.753621	0.451077	0.725052	85.3864	130.262	172.718	132.851	106.446
1952	ENSG00000108848	LUC7L3	839.693	-0.239817	0.318497	-0.752965	0.451471	0.725314	895.085	952.891	875.457	923.447	551.584
1953	ENSG00000073803	MAP3K13	122.401	0.368601	0.490811	0.751005	0.45265	0.726007	103.053	104.776	125.254	199.277	79.6484
1954	ENSG00000100106	TRIOBP	82.4267	0.375666	0.500524	0.750545	0.452926	0.726007	53.9799	85.6611	83.0629	96.3823	93.0472
1955	ENSG00000117174	ZNHIT6	102.908	-0.33716	0.448539	-0.751686	0.45224	0.726007	121.7	113.271	98.8844	100.29	80.3928
1956	ENSG00000178209	PLEC	253.215	0.259941	0.346172	0.750902	0.452711	0.726007	232.604	220.17	242.597	308.684	262.021
1957	ENSG00000198668	CALM1	1801.47	0.198409	0.264432	0.750323	0.45306	0.726007	1604.68	1704.73	2035.7	1978.44	1683.78
1958	ENSG00000085733	CTTN	112.333	0.345041	0.460126	0.749884	0.453325	0.726061	112.867	80.7055	94.9291	151.086	122.078
1959	ENSG00000087274	ADD1	233.727	0.313971	0.419213	0.748954	0.453885	0.726586	229.66	177.694	296.653	316.499	148.131
1960	ENSG00000168701	TMEM208	77.2829	0.400587	0.535361	0.748256	0.454306	0.726618	62.813	66.5466	68.5599	123.734	64.7609
1961	ENSG00000170734	POLH	134.36	-0.343571	0.459225	-0.748153	0.454368	0.726618	157.032	150.084	121.298	166.715	76.6709
1962	ENSG00000100503	NIN	123.907	-0.367423	0.492072	-0.746685	0.455253	0.726749	151.144	135.925	56.6938	132.851	142.92
1963	ENSG00000110237	ARHGEF17	74.3983	0.382672	0.512601	0.74653	0.455348	0.726749	73.609	52.3878	92.2922	75.5429	78.1596
1964	ENSG00000132507	EIF5A	107.666	-0.373372	0.500136	-0.74654	0.455341	0.726749	118.756	130.969	122.617	52.0986	113.89
1965	ENSG00000251562	MALAT1	101.7	-0.388715	0.52073	-0.746481	0.455377	0.726749	128.57	109.023	105.477	45.5862	119.845
1966	ENSG00000104067	TJP1	98.915	0.358422	0.480674	0.745666	0.455869	0.726795	83.4235	85.6611	80.426	144.573	100.491
1967	ENSG00000132792	CTNNBL1	89.095	-0.364568	0.488906	-0.745681	0.45586	0.726795	97.1638	109.023	60.6491	78.1478	100.491
1968	ENSG00000169727	GPS1	114.493	0.373096	0.501733	0.743615	0.45711	0.728402	112.867	81.4134	191.177	102.895	84.1147
1969	ENSG00000100300	TSPO	100.714	-0.371758	0.50061	-0.742609	0.457718	0.729002	105.015	128.846	83.0629	58.6109	128.033
1970	ENSG00000088205	DDX18	150.583	-0.409745	0.552223	-0.741992	0.458092	0.729007	239.474	115.395	123.935	56.0059	218.103
1971	ENSG00000185104	FAF1	107.955	0.33657	0.453699	0.741836	0.458187	0.729007	102.071	84.9532	102.84	105.5	144.409
1972	ENSG00000168264	IRF2BP2	111.571	0.376692	0.508772	0.740394	0.459061	0.730028	61.8315	126.722	102.84	171.925	94.536
1973	ENSG00000143753	DEGS1	74.4478	0.442621	0.59914	0.738761	0.460052	0.730863	75.5719	47.4322	36.9169	102.895	109.424
1974	ENSG00000266402	SNHG25	329	0.283	0.382997	0.73891	0.459962	0.730863	279.714	301.584	392.901	451.955	218.847
1975	ENSG00000138398	PPIG	374.83	-0.247765	0.335564	-0.738355	0.460299	0.730885	436.747	392.2	353.347	273.517	418.34
1976	ENSG00000138246	DNAJC13	103.461	0.357171	0.484237	0.737596	0.46076	0.730987	116.793	60.8831	110.751	101.592	127.289
1977	ENSG00000198142	SOWAHC	66.5976	-0.407202	0.552152	-0.737481	0.46083	0.730987	62.813	93.4485	42.1907	69.0306	65.5052
1978	ENSG00000044115	CTNNA1	156.374	-0.295944	0.402884	-0.734565	0.462604	0.732678	158.014	193.976	156.897	115.919	157.064
1979	ENSG00000124228	DDX27	222.703	-0.270613	0.368777	-0.733811	0.463064	0.732678	281.677	214.507	239.96	197.974	179.395
1980	ENSG00000148154	UGCG	180.771	0.277164	0.377493	0.734225	0.462812	0.732678	166.847	154.332	189.858	173.228	219.591
1981	ENSG00000186111	PIP5K1C	90.337	0.361534	0.491943	0.734911	0.462394	0.732678	72.6275	81.4134	131.846	79.4503	86.3478
1982	ENSG00000234456	MAGI2-AS3	84.6715	-0.428251	0.583312	-0.734171	0.462844	0.732678	102.071	98.4041	104.158	28.6542	90.0697
1983	ENSG00000087074	PPP1R15A	88.6889	-0.377449	0.514933	-0.733005	0.463555	0.732717	76.5533	129.554	68.5599	63.8207	104.957
1984	ENSG00000109171	SLAIN2	144.426	0.311862	0.425362	0.733169	0.463456	0.732717	139.366	113.271	185.903	114.617	168.974
1985	ENSG00000050405	LIMA1	567.158	-0.240988	0.328974	-0.732546	0.463835	0.732767	686.036	564.938	504.97	407.671	672.173
1986	ENSG00000116560	SFPQ	697.086	-0.249395	0.340616	-0.732187	0.464055	0.732767	827.365	715.022	445.639	631.695	865.711
1987	ENSG00000174953	DHX36	237.971	0.284002	0.388122	0.731734	0.464331	0.732834	245.363	175.57	220.183	337.338	211.403
1988	ENSG00000084733	RAB10	162.625	0.297513	0.406856	0.731248	0.464628	0.732934	161.94	124.598	137.12	186.252	203.215
1989	ENSG00000145734	BDP1	237.05	-0.287533	0.393576	-0.730565	0.465045	0.733223	245.363	286.717	141.075	260.493	251.6
1990	ENSG00000125450	NUP85	67.2027	0.386782	0.530817	0.728655	0.466213	0.734413	52.9985	60.1752	85.6999	76.8454	60.2946
1991	ENSG00000205302	SNX2	74.7725	-0.38519	0.528697	-0.728565	0.466268	0.734413	94.2195	79.9976	44.8276	83.3577	71.4602
1992	ENSG00000113719	ERGIC1	213.603	-0.275854	0.379301	-0.727269	0.467061	0.735293	251.252	225.126	208.317	234.443	148.876
1993	ENSG00000136436	CALCOCO2	100.205	-0.364471	0.501782	-0.726353	0.467623	0.735808	90.2937	141.589	67.2414	76.8454	125.055
1994	ENSG00000135679	MDM2	100.26	0.334558	0.461196	0.725415	0.468197	0.736179	79.4977	93.4485	117.343	122.432	88.5809
1995	ENSG00000157557	ETS2	103.941	-0.417273	0.575692	-0.72482	0.468563	0.736179	69.6832	175.57	75.1522	53.401	145.898
1996	ENSG00000180357	ZNF609	188.519	-0.269963	0.372423	-0.724883	0.468524	0.736179	208.068	212.383	154.26	170.623	197.26
1997	ENSG00000145555	MYO10	503.244	-0.278647	0.384848	-0.724044	0.469038	0.736557	500.541	625.822	308.519	381.622	699.715
1998	ENSG00000136810	TXN	252.438	-0.252671	0.350543	-0.720799	0.471033	0.73932	300.325	259.107	225.457	207.092	270.209
1999	ENSG00000172590	MRPL52	84.0036	0.384932	0.534344	0.720381	0.47129	0.739353	57.9057	84.2452	96.2475	57.3084	124.311
[truncated: 60,704 more rows]

## Sheet: ET025 vs ET025CBD075_12h
	gene		baseMean	log2FoldChange	lfcSE	stat	pvalue	padj	K7	K8	K28	K29	K30
1	ENSG00000157570	TSPAN18	113.33	2.80588	0.484709	5.78878	7.08974e-09	5.08264e-05	18.8308	30.3423	138.339	234.552	144.587
2	ENSG00000216412	RPL12P2	1033.75	2.34387	0.431457	5.43244	5.5588e-08	9.52504e-05	415.173	184.654	1056.58	2393.22	1119.14
3	ENSG00000225443	RPL36AP27	344.588	3.00567	0.556548	5.40056	6.64321e-08	9.52504e-05	82.4966	49.4145	240.469	1077.35	273.213
4	ENSG00000240038	AMY2B	1896.72	2.60921	0.482329	5.4096	6.31644e-08	9.52504e-05	581.063	352.837	1567.22	5437.1	1545.39
5	ENSG00000270992	0	123.603	3.3791	0.616666	5.47963	4.26212e-08	9.52504e-05	21.5209	15.6046	139.268	368.392	73.2324
6	ENSG00000232128	MTCO3P45	1146.26	2.27119	0.424245	5.35348	8.62794e-08	0.00010309	335.367	359.773	963.731	2871.6	1200.82
7	ENSG00000011422	PLAUR	181.478	-2.08609	0.399616	-5.22023	1.78696e-07	0.000116461	353.301	318.16	97.4873	53.0061	85.4377
8	ENSG00000214047	RPS11P7	505.508	2.6121	0.498863	5.2361	1.64003e-07	0.000116461	140.782	107.498	391.806	1453.69	433.761
9	ENSG00000226439	0	617.357	2.66532	0.508019	5.24649	1.55024e-07	0.000116461	165.89	127.437	563.569	1816.78	413.106
10	ENSG00000233839	0	367.72	2.45896	0.469946	5.23244	1.67289e-07	0.000116461	105.811	92.7606	315.673	971.336	353.018
11	ENSG00000235379	RPL7P31	479.89	2.72736	0.522259	5.22223	1.76784e-07	0.000116461	128.228	91.0268	376.022	1441.76	362.406
12	ENSG00000240371	RPS4XP13	679.801	2.65757	0.512169	5.18886	2.11585e-07	0.000126404	221.486	103.164	609.063	1947.97	517.321
13	ENSG00000079432	CIC	336.546	2.1398	0.414351	5.16423	2.41433e-07	0.000127256	95.9472	124.837	362.096	748.71	351.14
14	ENSG00000197061	H4C3	2011.18	-2.00401	0.38898	-5.15195	2.57791e-07	0.000127256	3820.85	3498.03	1327.68	940.857	468.499
15	ENSG00000230611	HMGB1P27	94.0158	2.99448	0.581918	5.14588	2.66263e-07	0.000127256	18.8308	17.3384	114.199	246.478	73.2324
16	ENSG00000104973	MED25	182.171	2.42589	0.474098	5.11685	3.10672e-07	0.000131012	43.9384	56.3499	168.978	435.975	205.614
17	ENSG00000139329	LUM	827.923	2.51045	0.489789	5.12557	2.96635e-07	0.000131012	258.25	175.118	617.419	2357.44	731.385
18	ENSG00000219149	PPIAP87	115.591	2.54226	0.499248	5.09217	3.53984e-07	0.000140984	34.9714	24.2738	106.772	250.454	161.487
19	ENSG00000137285	TUBB2B	326.614	2.71373	0.536105	5.06194	4.15018e-07	0.000156593	93.2571	57.2168	298.961	962.06	221.575
20	ENSG00000240950	0	186.229	2.69164	0.533237	5.04773	4.47087e-07	0.000160258	31.3846	55.483	141.124	502.232	200.92
21	ENSG00000188375	H3-5	144.464	2.96985	0.592665	5.011	5.41471e-07	0.000176446	30.4879	26.0077	133.697	437.3	94.8265
22	ENSG00000236913	RPS13P3	483.172	2.65332	0.528633	5.01921	5.1884e-07	0.000176446	151.543	79.7568	395.52	1428.51	360.529
23	ENSG00000153885	KCTD15	180.438	2.49214	0.502492	4.95956	7.06534e-07	0.000194813	52.9055	42.4792	203.331	459.827	143.648
24	ENSG00000171992	SYNPO	763.714	2.12249	0.426543	4.97602	6.49052e-07	0.000194813	245.697	260.943	710.265	1884.37	717.302
25	ENSG00000230175	0	357.361	2.22011	0.447228	4.96416	6.89992e-07	0.000194813	121.952	101.43	312.888	875.925	374.612
26	ENSG00000243680	RPL37P23	488.297	2.21835	0.445938	4.97458	6.53896e-07	0.000194813	144.369	161.247	374.165	1205.89	555.815
27	ENSG00000213862	RPL7AP62	176.708	3.18592	0.64622	4.93009	8.21936e-07	0.000218239	37.6615	22.54	159.693	585.717	77.9267
28	ENSG00000196923	PDLIM7	1978.52	1.84523	0.376066	4.90667	9.2634e-07	0.000220033	820.483	727.347	1781.7	4288.19	2274.9
29	ENSG00000204262	COL5A2	2155.72	2.00618	0.409093	4.90397	9.39168e-07	0.000220033	762.197	771.56	1818.83	5183.99	2242.04
30	ENSG00000240463	RPS19P3	2306.62	2.33018	0.475289	4.90266	9.45474e-07	0.000220033	754.127	595.575	1913.54	6526.37	1743.49
31	ENSG00000244053	RPL13AP2	175.254	2.48396	0.506783	4.90142	9.51461e-07	0.000220033	34.9714	58.0838	150.409	441.275	191.531
32	ENSG00000264316	MTCO3P13	588.611	2.40495	0.491345	4.89463	9.8489e-07	0.000220646	217.002	111.833	501.363	1602.11	510.749
33	ENSG00000100345	MYH9	9485.97	2.01453	0.414761	4.85709	1.19126e-06	0.000258792	3946.39	2770.68	9050.53	23127.9	8534.39
34	ENSG00000237205	RPL7P34	132.923	3.07152	0.633516	4.84836	1.24484e-06	0.000262478	31.3846	17.3384	104.915	422.723	88.2544
35	ENSG00000228453	RPS15AP9	125.435	2.9524	0.612332	4.82156	1.4244e-06	0.000291759	32.2813	17.3384	91.9166	377.668	107.971
36	ENSG00000104687	GSR	227.392	2.38418	0.495737	4.80937	1.51409e-06	0.000301515	68.1494	60.6845	580.281	266.355	161.487
37	ENSG00000213741	RPS29	889.355	-1.70275	0.356306	-4.77889	1.76262e-06	0.000341519	1690.28	1355	649.915	314.061	437.516
38	ENSG00000276368	H2AC14	35.0945	-3.57098	0.750464	-4.75837	1.95165e-06	0.000368194	89.6703	66.753	10.213	1.32515	7.51101
39	ENSG00000225272	0	237.622	2.63992	0.559721	4.7165	2.39938e-06	0.000430981	56.4923	58.0838	199.617	720.882	153.037
40	ENSG00000226080	RPL6P4	106.224	2.72616	0.578061	4.71605	2.40469e-06	0.000430981	23.3143	25.1407	129.055	282.257	71.3546
41	ENSG00000187957	DNER	83.7403	2.89254	0.61653	4.69165	2.7101e-06	0.000473872	16.1406	18.2054	71.4907	235.877	76.9879
42	ENSG00000214612	RPS19P1	115.356	2.76968	0.59525	4.65297	3.27189e-06	0.000533095	27.7978	23.4069	108.629	335.263	81.6822
43	ENSG00000241352	0	287.458	2.51859	0.540726	4.65778	3.1963e-06	0.000533095	93.2571	56.3499	308.246	812.318	167.12
44	ENSG00000256464	YWHABP2	268.195	2.39363	0.514397	4.65328	3.26703e-06	0.000533095	103.121	47.6807	254.395	707.631	228.147
45	ENSG00000271428	MPHOSPH6P1	58.9913	3.71574	0.801923	4.63354	3.59473e-06	0.00057268	9.86373	4.33461	41.7803	201.423	37.5551
46	ENSG00000259160	0	130.937	2.69475	0.585135	4.60534	4.11791e-06	0.000641768	34.0747	26.8746	91.9166	381.644	120.176
47	ENSG00000213130	EEF1DP5	42.0865	3.53352	0.769345	4.59289	4.3714e-06	0.000652886	3.58681	7.8023	71.4907	99.3863	28.1663
48	ENSG00000231434	HSP90AA3P	466.31	2.16755	0.4717	4.59519	4.3235e-06	0.000652886	107.604	193.324	353.74	1166.13	510.749
49	ENSG00000168610	STAT3	474.117	1.64769	0.360466	4.57099	4.8542e-06	0.000710199	192.791	222.799	657.343	850.747	446.905
50	ENSG00000170801	HTRA3	65.7815	2.86652	0.627725	4.56652	4.95888e-06	0.000711004	17.9341	9.53614	64.9915	166.969	69.4769
51	ENSG00000182985	CADM1	174.022	2.06222	0.453901	4.54333	5.53722e-06	0.000778359	48.4219	71.0876	159.693	368.392	222.514
52	ENSG00000169756	LIMS1	655.293	1.66127	0.367206	4.52408	6.06593e-06	0.000836282	303.982	266.145	973.016	1179.38	553.937
53	ENSG00000124766	SOX4	313.298	1.66419	0.369198	4.5076	6.55654e-06	0.000886865	122.848	149.111	313.816	552.588	428.128
54	ENSG00000108821	COL1A1	19852.6	1.57876	0.351585	4.49043	7.10812e-06	0.000894002	8378.79	9732.06	19906	40369.4	20876.9
55	ENSG00000143847	PPFIA4	46.4205	3.55544	0.7909	4.49543	6.94283e-06	0.000894002	8.07032	4.33461	36.2096	143.116	40.3717
56	ENSG00000144810	COL8A1	436.771	1.69946	0.378383	4.49139	7.07606e-06	0.000894002	172.167	199.392	410.375	857.373	544.548
57	ENSG00000226110	0	239.844	2.20562	0.49088	4.49319	7.01638e-06	0.000894002	88.7736	62.4184	250.682	609.57	187.775
58	ENSG00000213970	0	67.6357	2.85776	0.638803	4.47361	7.69083e-06	0.000931576	20.6242	7.8023	62.2062	169.619	77.9267
59	ENSG00000214255	RPS2P6	65.3048	3.13782	0.701648	4.47207	7.74656e-06	0.000931576	9.86373	13.0038	58.4924	200.098	45.0661
60	ENSG00000225482	RPS6P14	203.734	2.27749	0.509428	4.47069	7.7967e-06	0.000931576	72.6329	50.2815	208.901	530.061	156.792
61	ENSG00000233913	RPL10P9	402.904	2.45431	0.550327	4.45973	8.20624e-06	0.000964435	123.745	94.4945	358.382	1219.14	218.758
62	ENSG00000244753	RPL15P21	156.897	2.70448	0.607378	4.45271	8.47918e-06	0.00098044	46.6285	26.0077	116.056	485.005	110.787
63	ENSG00000273870	0	199.12	2.64496	0.594495	4.44909	8.62363e-06	0.000981314	63.6659	32.0761	181.048	604.269	114.543
64	ENSG00000226961	PPIAP60	105.315	3.08706	0.695284	4.43999	8.99627e-06	0.00100772	28.6945	9.53614	84.489	341.889	61.9658
65	ENSG00000146223	RPL7L1	647.33	1.96821	0.4441	4.43191	9.3404e-06	0.00101744	213.415	257.476	953.519	1417.91	394.328
66	ENSG00000275023	MLLT6	94.4872	2.7218	0.614222	4.43129	9.3669e-06	0.00101744	21.5209	21.673	81.7036	274.306	73.2324
67	ENSG00000160993	ALKBH4	38.9687	3.40938	0.770775	4.42331	9.72014e-06	0.00102524	5.38022	6.06845	58.4924	96.736	28.1663
68	ENSG00000228253	MT-ATP8	8321.62	-1.72623	0.390267	-4.42321	9.72465e-06	0.00102524	13681.9	14947.5	2439.97	3629.59	6909.19
69	ENSG00000168874	ATOH8	89.0305	2.12652	0.481146	4.4197	9.88395e-06	0.00102693	24.211	34.6769	100.273	140.466	145.526
70	ENSG00000145817	YIPF5	430.175	1.43741	0.326777	4.39874	1.08882e-05	0.00111511	214.312	210.662	694.481	530.061	501.36
71	ENSG00000119899	SLC17A5	154.113	1.70893	0.389008	4.39304	1.11776e-05	0.00112862	63.6659	66.753	186.619	238.527	215.003
72	ENSG00000078401	EDN1	75.5868	2.85286	0.652478	4.37234	1.22919e-05	0.0012239	17.9341	13.8707	52.9217	219.975	73.2324
73	ENSG00000171812	COL8A2	276.823	2.26761	0.519342	4.36632	1.26357e-05	0.00124089	101.327	66.753	197.76	761.962	256.313
74	ENSG00000227747	0	92.8089	2.75658	0.633274	4.3529	1.34347e-05	0.00130153	23.3143	18.2054	79.8467	276.957	65.7213
75	ENSG00000243759	ST13P15	78.3546	2.15047	0.496043	4.33526	1.45587e-05	0.00139162	23.3143	27.7415	89.1312	135.165	116.421
76	ENSG00000198868	MTND4LP30	34.2568	3.46366	0.800623	4.32621	1.51698e-05	0.00143095	5.38022	4.33461	39.9234	88.7851	32.8607
77	ENSG00000242706	RPS27AP9	139.829	2.56002	0.596604	4.29099	1.77879e-05	0.00165612	44.8351	26.0077	96.5588	413.447	118.298
78	ENSG00000138758	SEPTIN11	4681.96	1.2746	0.297301	4.28723	1.80913e-05	0.00166278	2248.03	2808.83	6001.5	7329.41	5022.05
79	ENSG00000228657	RPL23AP58	220.89	2.06116	0.482193	4.27455	1.91523e-05	0.00173801	82.4966	69.3537	172.692	543.312	236.597
80	ENSG00000138663	COPS4	214.12	2.21401	0.521153	4.24829	2.1541e-05	0.00193034	74.4263	59.8176	157.837	580.416	198.103
81	ENSG00000231369	0	92.4556	2.71481	0.639458	4.24549	2.18116e-05	0.00193046	26.0044	16.4715	71.4907	276.957	71.3546
82	ENSG00000136942	RPL35	5493.87	1.56649	0.369884	4.23509	2.28458e-05	0.00199733	2665.9	2380.57	5696.97	11626.9	5099.04
83	ENSG00000229817	0	29.3584	4.43284	1.04791	4.23019	2.33496e-05	0.00201679	0	4.33461	35.2811	87.46	19.7164
84	ENSG00000196586	MYO6	399.713	1.53127	0.362473	4.22451	2.39461e-05	0.00204337	148.853	225.4	417.803	679.803	526.71
85	ENSG00000214286	PDCL3P3	49.2361	2.57541	0.610015	4.22188	2.42274e-05	0.00204337	13.4505	11.27	77.0614	92.7606	51.6382
86	ENSG00000228224	NACA4P	1467.75	1.68504	0.39961	4.21671	2.47892e-05	0.00206644	631.279	628.518	1182.85	3278.42	1617.68
87	ENSG00000236191	RPS15AP25	118.602	2.46229	0.584419	4.21323	2.51748e-05	0.00207446	43.0417	20.8061	99.3442	324.662	105.154
88	ENSG00000198763	MT-ND2	3966.1	-1.37757	0.329139	-4.18538	2.84692e-05	0.00229321	5920.93	6651.89	1774.27	2156.02	3327.38
89	ENSG00000237170	RPS7P15	267.732	2.42464	0.579252	4.18581	2.84147e-05	0.00229321	86.0834	61.5514	215.4	828.22	147.404
90	ENSG00000251562	MALAT1	388.411	-1.78231	0.426719	-4.17678	2.95663e-05	0.00235512	935.261	417.856	175.477	136.491	276.969
91	ENSG00000213216	0	78.5952	3.05092	0.734326	4.15472	3.25688e-05	0.00256578	16.1406	13.0038	64.0631	265.03	34.7384
92	ENSG00000178982	EIF3K	974.887	1.49089	0.360725	4.13304	3.57994e-05	0.00278963	536.228	397.917	1116	1875.09	949.204
93	ENSG00000272333	KMT2B	147.166	2.16693	0.524796	4.12909	3.64201e-05	0.00280748	36.7648	58.0838	168.978	363.091	108.91
94	ENSG00000058262	SEC61A1	1383.98	1.62229	0.394849	4.10864	3.98001e-05	0.00295426	686.874	544.427	1248.77	3046.52	1393.29
95	ENSG00000163064	EN1	75.0177	2.98299	0.726582	4.10552	4.0341e-05	0.00295426	12.5538	16.4715	48.2794	251.779	46.0049
96	ENSG00000163110	PDLIM5	510.772	1.40319	0.341599	4.10771	3.99609e-05	0.00295426	259.147	254.875	805.895	751.361	482.582
97	ENSG00000171159	BBLN	90.5934	2.00737	0.488974	4.10527	4.03846e-05	0.00295426	30.4879	33.8099	87.2743	164.319	137.076
98	ENSG00000180189	HMGB1P14	83.6015	2.67299	0.650484	4.10924	3.96971e-05	0.00295426	10.7604	28.6084	78.9183	235.877	63.8436
99	ENSG00000143013	LMO4	404.348	1.42515	0.348166	4.09332	4.25243e-05	0.00307936	221.486	180.32	497.649	690.404	431.883
100	ENSG00000225137	DYNC1I2P1	125.775	2.2187	0.54239	4.09061	4.30243e-05	0.00308441	42.145	36.4107	123.484	327.312	99.5209
101	ENSG00000074590	NUAK1	229.701	1.86474	0.456955	4.08079	4.48837e-05	0.00318586	94.1538	83.2245	205.188	534.036	231.902
102	ENSG00000242137	RPL11P5	108.168	2.26902	0.556386	4.07814	4.53978e-05	0.00319076	42.145	23.4069	92.845	271.656	110.787
103	ENSG00000102316	MAGED2	942.625	1.52252	0.376835	4.04029	5.33857e-05	0.00371575	428.624	458.602	816.108	1918.82	1090.97
104	ENSG00000235297	FAUP1	103.559	2.79297	0.693005	4.03023	5.57226e-05	0.00384111	34.0747	11.27	98.4157	323.337	50.6993
105	ENSG00000095752	IL11	135.367	1.96015	0.486922	4.0256	5.68305e-05	0.00384357	49.3186	49.4145	128.126	310.085	139.893
106	ENSG00000269688	0	65.456	2.71124	0.673159	4.02764	5.63406e-05	0.00384357	20.6242	9.53614	85.4174	172.27	39.4328
107	ENSG00000268230	0	46.9419	3.11268	0.77777	4.00206	6.27937e-05	0.00420718	6.27692	10.4031	37.138	147.092	33.7995
108	ENSG00000118971	CCND2	160.306	2.36502	0.59153	3.99813	6.38443e-05	0.00423796	43.0417	48.5476	118.842	485.005	106.093
109	ENSG00000163382	NAXE	552.931	1.94398	0.488241	3.9816	6.84538e-05	0.0044839	250.18	157.78	519.004	1453.69	384
110	ENSG00000177469	CAVIN1	12493.1	1.38547	0.348074	3.9804	6.88002e-05	0.0044839	5902.99	6795.8	18225.5	21633.1	9907.96
111	ENSG00000161016	RPL8	6246.41	1.57419	0.396248	3.97274	7.10505e-05	0.00458884	2995.88	2716.93	5792.6	14139.4	5587.25
112	ENSG00000211459	MT-RNR1	14386.6	-1.13086	0.285223	-3.96484	7.34466e-05	0.00470124	23204	19487.5	8768.29	8886.46	11586.7
113	ENSG00000278487	0	186.115	2.08997	0.527741	3.96021	7.48842e-05	0.00475084	79.8065	45.9469	148.552	486.331	169.937
114	ENSG00000115935	WIPF1	263.841	1.85724	0.469341	3.95713	7.58569e-05	0.00477034	106.708	97.9622	268.322	638.723	207.492
115	ENSG00000100316	RPL3	947.508	1.75293	0.443341	3.95391	7.68837e-05	0.00479286	442.971	338.966	962.803	2301.79	691.013
116	ENSG00000204256	BRD2	693.276	1.41202	0.357344	3.95142	7.76881e-05	0.00480126	326.4	367.575	663.842	1303.95	804.617
117	ENSG00000253558	0	46.7538	3.27481	0.83001	3.9455	7.96334e-05	0.00487942	7.17362	7.8023	42.7087	156.368	19.7164
118	ENSG00000233668	0	106.926	2.53694	0.644457	3.93655	8.26627e-05	0.00502211	35.8681	19.0723	103.058	319.361	57.2715
119	ENSG00000224411	HSP90AA2P	178.584	2.03448	0.517925	3.92814	8.56045e-05	0.00511665	46.6285	78.023	182.905	449.226	136.137
120	ENSG00000268623	0	82.8831	1.94985	0.496394	3.92802	8.56463e-05	0.00511665	30.4879	30.3423	98.4157	160.343	94.8265
121	ENSG00000100097	LGALS1	16420.3	1.52366	0.388735	3.91954	8.8719e-05	0.00521333	9037.87	6415.22	16548.7	35608.1	14491.6
122	ENSG00000204228	HSD17B8	55.2726	2.80989	0.716877	3.91963	8.86864e-05	0.00521333	14.3472	9.53614	42.7087	165.644	44.1272
123	ENSG00000165795	NDRG2	58.4103	2.44144	0.624756	3.90783	9.31304e-05	0.00542806	17.9341	13.8707	69.6338	141.791	48.8216
124	ENSG00000240376	0	72.0083	2.57796	0.660607	3.90241	9.52402e-05	0.00550627	13.4505	22.54	81.7036	200.098	42.2494
125	ENSG00000119616	FCF1	481.152	1.4852	0.381749	3.89053	0.000100027	0.00573675	241.213	221.065	524.574	960.735	458.172
126	ENSG00000141682	PMAIP1	93.7405	-1.82743	0.474125	-3.85433	0.000116048	0.00639961	159.613	169.917	63.1346	45.0551	30.9829
127	ENSG00000164104	HMGB2	614.014	1.65943	0.430225	3.85711	0.000114733	0.00639961	251.077	283.483	653.629	1415.26	466.622
128	ENSG00000177272	KCNA3	32.7225	3.54135	0.918005	3.85766	0.00011448	0.00639961	3.58681	5.20153	20.4259	109.988	24.4108
129	ENSG00000224555	0	27.3299	3.8082	0.986381	3.86078	0.000113028	0.00639961	2.69011	3.46769	13.9268	87.46	29.1052
130	ENSG00000228844	0	41.1047	3.2762	0.849698	3.85573	0.000115385	0.00639961	4.48351	8.66922	60.3493	117.938	14.0831
131	ENSG00000229814	RPL35AP21	60.9648	3.22834	0.839096	3.8474	0.000119378	0.00653301	5.38022	14.7377	38.9949	221.3	24.4108
132	ENSG00000224074	LINC00691	48.6342	2.80502	0.73	3.8425	0.000121787	0.00661435	7.17362	13.8707	31.5673	135.165	55.3937
133	ENSG00000091986	CCDC80	3953.38	1.39178	0.362683	3.83746	0.000124312	0.00668262	1897.42	2106.62	3985.84	8022.47	3754.57
134	ENSG00000235137	HSP90AB6P	125.277	1.65804	0.4322	3.83629	0.000124909	0.00668262	46.6285	62.4184	136.482	214.675	166.181
135	ENSG00000080824	HSP90AA1	13303.3	1.42717	0.372252	3.83388	0.000126139	0.00669843	5879.68	7334.16	22166.8	21757.7	9378.44
136	ENSG00000079462	PAFAH1B3	175.768	1.79028	0.467252	3.83151	0.000127358	0.00671345	65.4593	76.2891	241.397	367.067	128.626
137	ENSG00000122786	CALD1	7598.51	1.20658	0.315311	3.82663	0.000129907	0.00674859	3839.68	4675.31	7344.97	9454.95	12677.6
138	ENSG00000196405	EVL	120.019	2.42465	0.63342	3.82788	0.000129254	0.00674859	31.3846	34.6769	67.7769	372.368	93.8876
139	ENSG00000242327	0	59.1837	2.60318	0.682598	3.81364	0.000136937	0.00706258	15.2439	13.8707	40.8518	169.619	56.3326
140	ENSG00000162493	PDPN	154.21	1.88343	0.495312	3.80251	0.000143235	0.00733464	74.4263	43.3461	136.482	352.49	164.303
141	ENSG00000136448	NMT1	912.942	1.26343	0.332537	3.79937	0.000145064	0.00737565	442.074	549.628	1164.28	1525.25	883.483
142	ENSG00000113328	CCNG1	165.621	1.89916	0.500575	3.79396	0.000148261	0.00748022	65.4593	59.8176	119.77	396.22	186.836
143	ENSG00000220771	BOLA2P3	86.9132	2.31637	0.610796	3.79238	0.000149208	0.00748022	24.211	26.8746	70.5622	242.503	70.4157
144	ENSG00000125378	BMP4	330.743	1.51086	0.398817	3.78835	0.000151648	0.00754976	136.299	176.852	280.392	625.471	434.7
145	ENSG00000159186	ATP5POP1	55.5568	2.76127	0.730635	3.77928	0.000157285	0.00767058	14.3472	10.4031	47.351	170.945	34.7384
146	ENSG00000198786	MT-ND5	5369.42	-1.13858	0.301215	-3.77995	0.000156859	0.00767058	8809.21	7159.04	2976.61	3400.34	4501.91
147	ENSG00000264364	DYNLL2	1354.13	1.46444	0.38732	3.78095	0.000156231	0.00767058	760.404	556.564	1412.17	2833.17	1208.33
148	ENSG00000091879	ANGPT2	74.057	2.69512	0.713783	3.77582	0.000159481	0.00772514	17.9341	16.4715	45.4941	242.503	47.8827
149	ENSG00000023909	GCLM	281.653	1.41098	0.374867	3.76396	0.000167246	0.00801953	138.989	143.042	258.109	469.104	399.022
150	ENSG00000166825	ANPEP	425.826	-1.18785	0.315656	-3.76314	0.000167796	0.00801953	685.977	598.176	271.108	258.404	315.462
151	ENSG00000123131	PRDX4	343.992	1.73862	0.463205	3.75345	0.000174414	0.00828062	154.233	131.772	339.813	832.195	261.947
152	ENSG00000227081	0	627.797	1.28748	0.343282	3.75049	0.000176487	0.00832392	320.123	352.837	602.564	1087.95	775.512
153	ENSG00000169221	TBC1D10B	113.474	2.08188	0.555658	3.74669	0.00017918	0.00834117	46.6285	30.3423	99.3442	291.533	99.5209
154	ENSG00000173320	STOX2	66.156	2.55652	0.682299	3.74692	0.000179018	0.00834117	17.0373	16.4715	56.6355	197.448	43.1883
155	ENSG00000066279	ASPM	301.277	-1.31422	0.351011	-3.74411	0.000181038	0.00837328	440.281	499.347	231.184	188.171	147.404
156	ENSG00000140443	IGF1R	261.454	1.69991	0.454911	3.7368	0.000186379	0.00856506	86.9801	135.24	195.903	560.539	328.607
157	ENSG00000216676	RPL8P1	55.3678	2.49255	0.66785	3.7322	0.000189811	0.00866725	17.9341	11.27	41.7803	145.767	60.0881
158	ENSG00000218476	RPL6P18	40.8194	2.65421	0.71413	3.7167	0.000201839	0.00915814	11.6571	7.8023	36.2096	103.362	45.0661
159	ENSG00000239809	0	87.4221	2.15973	0.581462	3.71432	0.000203755	0.0091869	32.2813	24.2738	65.92	222.625	92.0099
160	ENSG00000232174	0	86.7306	2.74865	0.742349	3.70264	0.000213367	0.00956019	26.0044	13.0038	53.8501	299.484	41.3106
161	ENSG00000105258	POLR2I	290.028	1.46171	0.395129	3.69933	0.000216173	0.00962573	144.369	137.841	275.75	564.514	327.668
162	ENSG00000104332	SFRP1	543.307	-1.16212	0.314452	-3.69569	0.000219292	0.00970434	834.83	791.5	419.66	371.042	299.502
163	ENSG00000107731	UNC5B	63.9023	1.92613	0.522007	3.68986	0.000224376	0.00986842	23.3143	24.2738	77.9898	111.313	82.6211
164	ENSG00000160014	CALM3	195.411	1.6516	0.448298	3.68416	0.000229462	0.0100229	104.017	66.753	226.542	404.171	175.57
165	ENSG00000235962	RPL7AP53	41.3006	3.17295	0.861558	3.6828	0.000230685	0.0100229	8.07032	6.06845	40.8518	136.491	15.022
166	ENSG00000172348	RCAN2	47.747	2.76952	0.752461	3.68062	0.000232667	0.0100481	9.86373	11.27	40.8518	145.767	30.9829
167	ENSG00000106261	ZKSCAN1	401.004	1.19323	0.324509	3.67704	0.000235956	0.0101292	217.899	234.936	575.639	431.999	544.548
168	ENSG00000173227	SYT12	53.0181	3.15087	0.857306	3.67532	0.000237552	0.010137	5.38022	13.0038	25.0682	193.472	28.1663
169	ENSG00000163754	GYG1	173.359	1.89319	0.515417	3.67313	0.000239602	0.0101639	73.5296	58.0838	188.475	429.349	117.36
170	ENSG00000175749	EIF3KP1	104.758	2.35366	0.641388	3.66963	0.0002429	0.0102432	39.4549	20.8061	66.8484	314.061	82.6211
171	ENSG00000165525	NEMF	528.067	1.17634	0.32151	3.6588	0.000253397	0.0106234	271.701	329.43	664.77	801.717	572.715
172	ENSG00000135637	CCDC142	65.5147	1.91322	0.523353	3.6557	0.000256478	0.0106901	18.8308	30.3423	81.7036	104.687	92.0099
173	ENSG00000104808	DHDH	31.8161	3.82178	1.04619	3.65306	0.000259133	0.0107383	6.27692	0.866922	16.7121	119.264	15.9609
174	ENSG00000240270	RPL12P37	36.6099	2.6324	0.722484	3.64355	0.000268907	0.0110793	14.3472	3.46769	58.4924	56.9815	49.7604
175	ENSG00000182492	BGN	559.444	1.38168	0.379967	3.63631	0.000276567	0.0113298	281.565	287.818	507.862	1107.83	612.147
176	ENSG00000073905	VDAC1P1	24.7483	3.10834	0.856978	3.6271	0.000286625	0.0116751	7.17362	1.73384	37.138	41.0797	36.6162
177	ENSG00000077312	SNRPA	342.093	1.68433	0.464918	3.62286	0.000291364	0.0118011	170.373	123.103	321.244	821.594	274.152
178	ENSG00000168487	BMP1	193.844	1.36878	0.378123	3.61994	0.000294674	0.0118681	84.29	114.434	214.472	280.932	275.091
179	ENSG00000253667	0	49.8627	2.96938	0.821543	3.6144	0.000301047	0.012057	11.6571	7.8023	21.3544	170.945	37.5551
180	ENSG00000053254	FOXN3	152.779	1.51808	0.420254	3.6123	0.000303493	0.0120875	81.5999	62.4184	161.55	274.306	184.02
181	ENSG00000114019	AMOTL2	526.234	1.20486	0.333825	3.60926	0.00030707	0.0120955	247.49	342.434	556.142	810.993	674.113
182	ENSG00000129219	PLD2	109.73	1.88253	0.521542	3.60954	0.000306739	0.0120955	42.145	41.6122	84.489	251.779	128.626
183	ENSG00000143315	PIGM	177.938	1.44171	0.400276	3.6018	0.000316017	0.0123799	78.0131	97.0952	250.682	290.208	173.692
184	ENSG00000216642	0	64.8755	2.56122	0.712652	3.59393	0.000325725	0.0126909	21.5209	11.27	46.4225	200.098	45.0661
185	ENSG00000006047	YBX2	27.5432	3.14034	0.87671	3.58196	0.000341023	0.0131651	1.79341	7.8023	28.782	70.233	29.1052
186	ENSG00000272886	DCP1A	104.106	1.93074	0.539079	3.58154	0.000341569	0.0131651	27.7978	49.4145	122.555	237.202	83.56
187	ENSG00000180185	FAHD1	213.517	1.61586	0.451954	3.57527	0.00034987	0.0134129	94.1538	96.2283	254.395	458.502	164.303
188	ENSG00000141696	P3H4	285.999	1.20444	0.337402	3.56976	0.000357302	0.013625	156.923	163.848	397.377	393.57	318.279
189	ENSG00000108848	LUC7L3	1248.1	1.41518	0.396945	3.56519	0.000363593	0.0137376	598.997	648.457	1277.55	2687.41	1028.07
190	ENSG00000145390	USP53	245.022	-1.31277	0.368257	-3.56483	0.000364087	0.0137376	385.582	378.845	201.474	125.889	133.32
191	ENSG00000071575	TRIB2	148.968	1.83112	0.514962	3.55583	0.000376789	0.0141424	58.2857	58.9507	101.201	356.466	169.937
192	ENSG00000235803	MTCO2P23	46.4415	2.66727	0.750938	3.55191	0.00038244	0.0142798	7.17362	14.7377	47.351	133.84	29.1052
193	ENSG00000160991	ORAI2	237.879	1.26755	0.357232	3.54825	0.000387804	0.014405	141.679	116.168	330.528	341.889	259.13
194	ENSG00000108578	BLMH	158.553	1.49189	0.423053	3.52649	0.000421109	0.0154209	75.323	76.2891	155.051	295.509	190.592
195	ENSG00000230829	0	61.4414	2.80776	0.796262	3.52618	0.000421606	0.0154209	17.9341	8.66922	45.4941	210.699	24.4108
196	ENSG00000260109	0	109.804	1.98666	0.563205	3.52742	0.000419636	0.0154209	51.112	27.7415	81.7036	272.981	115.482
197	ENSG00000139629	GALNT6	302.956	1.31147	0.372245	3.52314	0.000426467	0.0155195	151.543	169.05	478.152	446.576	269.458
198	ENSG00000177830	CHID1	315.536	1.54657	0.440045	3.51457	0.000440473	0.0159482	175.754	117.034	318.458	690.404	276.03
199	ENSG00000112079	STK38	366.845	1.56041	0.444286	3.51217	0.000444465	0.0160119	171.27	166.449	297.104	845.447	353.956
200	ENSG00000240311	0	65.4415	2.95664	0.842336	3.51005	0.000448021	0.0160593	19.7275	6.06845	36.2096	239.852	25.3497
201	ENSG00000221852	KRTAP1-5	60.8191	-1.9579	0.558319	-3.50678	0.000453568	0.0161773	133.609	85.8253	38.9949	27.8282	17.8387
202	ENSG00000001617	SEMA3F	68.1311	2.63852	0.752892	3.50451	0.000457449	0.0162349	22.4176	10.4031	39.9234	226.601	41.3106
203	ENSG00000123636	BAZ2B	201.529	1.34799	0.385176	3.49967	0.000465831	0.0164509	101.327	107.498	213.544	345.864	239.413
204	ENSG00000063245	EPN1	545.727	1.1694	0.335118	3.48952	0.000483895	0.01684	345.23	278.282	615.563	897.127	592.431
205	ENSG00000125354	SEPTIN6	123.744	1.87421	0.536763	3.49169	0.000479976	0.01684	38.5582	56.3499	138.339	298.159	87.3155
206	ENSG00000223945	RPL6P31	36.1248	2.86512	0.820906	3.49019	0.000482675	0.01684	9.86373	5.20153	33.4242	108.662	23.4719
207	ENSG00000176343	RPL37AP8	87.3079	2.46115	0.705698	3.48754	0.000487479	0.0168828	31.3846	15.6046	60.3493	282.257	46.9438
208	ENSG00000105576	TNPO2	807.404	1.33589	0.383186	3.48625	0.000489836	0.0168828	451.938	390.982	811.466	1641.86	740.773
209	ENSG00000215369	RPL37P3	69.2336	2.3104	0.663565	3.4818	0.000498056	0.017084	31.3846	9.53614	50.1363	176.245	78.8656
210	ENSG00000134897	BIVM	144.019	1.73496	0.498614	3.47956	0.000502237	0.0171454	65.4593	54.6161	268.322	242.503	89.1933
211	ENSG00000117616	RSRP1	28.2368	-2.48139	0.713718	-3.47671	0.000507609	0.0172467	63.6659	47.6807	8.35605	9.27606	12.2054
212	ENSG00000287932	0	55.4211	2.44719	0.704879	3.47179	0.000517005	0.0174831	17.0373	13.0038	52.9217	160.343	33.7995
213	ENSG00000136868	SLC31A1	147.951	1.47845	0.426391	3.46735	0.000525615	0.0176908	68.1494	74.5553	237.683	227.926	131.443
214	ENSG00000236238	0	44.2599	2.33832	0.676113	3.45848	0.000543231	0.0181982	16.1406	9.53614	46.4225	106.012	43.1883
215	ENSG00000131051	RBM39	1867.81	1.20801	0.350614	3.44541	0.000570204	0.019013	936.157	1154.74	1777.05	3489.12	1981.97
216	ENSG00000069275	NUCKS1	6352.96	1.09399	0.318494	3.43488	0.000592808	0.0195537	3298.07	4260.92	7242.84	10617.1	6345.87
217	ENSG00000091656	ZFHX4	439.419	1.35991	0.396291	3.43159	0.000600058	0.0195537	208.035	244.472	443.799	890.502	410.289
218	ENSG00000117411	B4GALT2	749.899	1.49974	0.436546	3.43548	0.000591514	0.0195537	379.305	335.499	574.711	1755.83	704.157
219	ENSG00000141569	TRIM65	76.2864	2.23174	0.650093	3.43296	0.00059703	0.0195537	11.6571	35.5438	90.0597	193.472	50.6993
220	ENSG00000142856	ITGB3BP	50.9407	-1.93329	0.563343	-3.43182	0.000599547	0.0195537	87.8769	94.4945	20.4259	33.1288	18.7775
221	ENSG00000225779	0	56.8096	2.3105	0.674184	3.42711	0.000610044	0.0197892	16.1406	17.3384	55.707	156.368	38.4939
222	ENSG00000235459	RPS26P31	85.4791	2.34251	0.684641	3.42151	0.000622746	0.0201102	27.7978	21.673	77.9898	262.38	37.5551
223	ENSG00000204138	PHACTR4	263.403	1.37454	0.402632	3.4139	0.000640403	0.0205877	138.989	130.038	335.171	490.306	222.514
224	ENSG00000124177	CHD6	129.293	1.66674	0.488902	3.40915	0.000651656	0.0208559	55.5956	56.3499	179.191	262.38	92.9488
225	ENSG00000065000	AP3D1	1077.85	1.04831	0.307801	3.40579	0.000659728	0.0210204	551.472	762.024	1401.96	1513.32	1160.45
226	ENSG00000119004	CYP20A1	275.891	1.29896	0.38207	3.39979	0.000674366	0.0212975	153.336	140.441	363.024	475.729	246.924
227	ENSG00000134086	VHL	168.415	1.35324	0.397978	3.40028	0.000673178	0.0212975	71.7362	102.297	215.4	267.681	184.959
228	ENSG00000234152	ELOBP1	40.4493	2.43983	0.717941	3.39837	0.000677875	0.0213144	9.86373	12.1369	43.6372	104.687	31.9218
229	ENSG00000169567	HINT1	301.85	-1.17199	0.34546	-3.39254	0.000692475	0.0216784	494.98	411.788	222.828	159.018	220.636
230	ENSG00000174780	SRP72	938.306	1.05178	0.310741	3.38474	0.000712468	0.0222073	556.852	584.305	1056.58	1478.87	1014.93
231	ENSG00000228887	EEF1DP1	65.345	2.21807	0.655679	3.38285	0.000717373	0.0222634	28.6945	12.1369	77.0614	165.644	43.1883
232	ENSG00000168542	COL3A1	390.413	1.61648	0.478149	3.3807	0.000723008	0.0223416	199.965	148.244	310.102	972.661	321.096
233	ENSG00000234297	PSIP1P1	34.7891	2.55249	0.757535	3.36947	0.000753135	0.0231727	9.86373	7.8023	24.1397	86.1348	46.0049
234	ENSG00000196396	PTPN1	614.263	1.11474	0.331742	3.36026	0.00077869	0.0238565	376.615	345.902	675.912	1020.37	652.519
235	ENSG00000165632	TAF3	244.02	1.57571	0.469258	3.35788	0.000785441	0.023961	98.6373	123.97	276.678	549.938	170.875
236	ENSG00000070756	PABPC1	1834.29	-0.92623	0.27732	-3.33994	0.00083798	0.0243525	2709.84	2416.11	1348.11	1256.24	1441.18
237	ENSG00000099956	SMARCB1	160.201	1.78901	0.535305	3.34203	0.000831672	0.0243525	80.7032	48.5476	117.913	405.496	148.342
238	ENSG00000108107	RPL28	1227.72	1.31086	0.391497	3.34833	0.000813002	0.0243525	762.197	537.491	1226.48	2527.06	1085.34
239	ENSG00000111142	METAP2	2366.02	1.20415	0.360366	3.34147	0.000833359	0.0243525	1168.4	1485.9	2795.56	4411.43	1968.82
240	ENSG00000123908	AGO2	141.075	-1.29141	0.386664	-3.33987	0.000838182	0.0243525	216.105	221.065	79.8467	95.4109	92.9488
241	ENSG00000164091	WDR82	369.153	1.34663	0.402983	3.34166	0.000832795	0.0243525	174.857	208.061	444.728	719.557	298.563
242	ENSG00000166963	MAP1A	1398.87	0.977202	0.291804	3.34883	0.000811531	0.0243525	799.859	969.219	1552.37	1974.48	1698.43
243	ENSG00000197879	MYO1C	910.766	0.982684	0.293256	3.35095	0.000805359	0.0243525	528.158	620.716	1247.84	1038.92	1118.2
244	ENSG00000214144	0	64.5638	2.22672	0.666718	3.33982	0.000838336	0.0243525	7.17362	32.943	47.351	124.564	110.787
245	ENSG00000226701	RPL15P14	71.8457	2.80879	0.841061	3.33958	0.000839037	0.0243525	23.3143	7.8023	48.2794	261.055	18.7775
246	ENSG00000230074	0	45.7284	2.57071	0.767211	3.35073	0.000806003	0.0243525	12.5538	10.4031	54.7786	131.19	19.7164
247	ENSG00000278943	0	50.6073	2.61061	0.781716	3.33959	0.000839035	0.0243525	15.2439	9.53614	40.8518	162.994	24.4108
248	ENSG00000235761	MTCO3P46	54.3954	2.10898	0.632608	3.33379	0.000856728	0.0247656	21.5209	14.7377	55.707	131.19	48.8216
249	ENSG00000143614	GATAD2B	185.92	1.48543	0.445819	3.33191	0.000862508	0.0248326	99.534	78.8899	171.763	386.944	192.47
250	ENSG00000131711	MAP1B	3309.34	1.03793	0.311844	3.32837	0.000873563	0.0250459	1642.76	2412.64	4601.4	4591.65	3298.27
251	ENSG00000183684	ALYREF	548.094	1.21434	0.364963	3.3273	0.000876905	0.0250459	312.052	299.088	557.07	1023.02	549.243
252	ENSG00000166275	BORCS7	80.9829	1.70631	0.513606	3.32222	0.000893054	0.025406	26.9011	41.6122	114.199	147.092	75.1101
253	ENSG00000128710	HOXD10	245.046	1.2319	0.3713	3.3178	0.00090731	0.0257095	133.609	136.974	239.54	401.521	313.585
254	ENSG00000240163	RPL36AP44	49.7443	2.22164	0.670571	3.31306	0.000922808	0.0260457	18.8308	12.1369	47.351	127.215	43.1883
255	ENSG00000225984	HMGB1P26	30.533	3.58403	1.08228	3.31157	0.000927756	0.0260827	6.27692	1.73384	25.9966	113.963	4.69438
256	ENSG00000132005	RFX1	225.867	1.38974	0.420307	3.30649	0.000944723	0.0264559	124.642	104.031	216.329	450.551	233.78
257	ENSG00000187837	H1-2	165.281	-1.6696	0.505325	-3.30402	0.000953105	0.0265868	286.945	273.947	107.7	125.889	31.9218
258	ENSG00000134871	COL4A2	315.516	-1.27936	0.387993	-3.29739	0.000975889	0.0268182	546.092	429.993	218.186	123.239	260.069
259	ENSG00000154380	ENAH	1099.54	1.07179	0.325306	3.2947	0.00098528	0.0268182	577.476	746.42	1143.85	1231.07	1798.89
260	ENSG00000155229	MMS19	320.081	1.27358	0.386407	3.29595	0.000980903	0.0268182	172.167	173.384	403.876	577.766	273.213
261	ENSG00000169504	CLIC4	148.637	-1.36342	0.413698	-3.29568	0.000981839	0.0268182	246.593	223.666	103.058	60.957	108.91
262	ENSG00000183160	TMEM119	79.8405	1.63539	0.496631	3.29298	0.000991328	0.0268182	30.4879	39.8784	79.8467	139.141	109.849
263	ENSG00000205060	SLC35B4	154.952	1.30708	0.396478	3.29672	0.000978208	0.0268182	69.9428	94.4945	236.755	196.122	177.448
264	ENSG00000229117	RPL41	1090.12	-1.15172	0.349721	-3.29327	0.000990303	0.0268182	2107.25	1146.07	760.401	861.348	575.531
265	ENSG00000235698	PA2G4P2	97.5798	2.07209	0.628233	3.29829	0.00097276	0.0268182	47.5252	19.0723	95.6304	263.705	61.9658
266	ENSG00000249448	MTCO1P24	41.5044	2.53854	0.77199	3.28831	0.00100791	0.0271642	13.4505	7.8023	38.0665	121.914	26.2885
267	ENSG00000237774	0	29.704	2.75491	0.839027	3.28346	0.00102542	0.0275328	8.07032	5.20153	23.2113	84.8097	27.2274
268	ENSG00000085117	CD82	185.107	1.53594	0.46842	3.27897	0.00104185	0.0278695	83.3933	89.2929	239.54	385.619	127.687
269	ENSG00000123485	HJURP	173.843	-1.34104	0.409202	-3.2772	0.00104841	0.0279406	260.94	285.217	147.624	99.3863	76.049
270	ENSG00000163683	SMIM14	225.559	1.16011	0.354675	3.27092	0.00107197	0.0284628	121.952	136.974	271.108	333.938	263.824
271	ENSG00000170962	PDGFD	27.4348	3.26623	0.999003	3.26949	0.00107741	0.0285017	4.48351	4.33461	12.0699	99.3863	16.8998
272	ENSG00000102359	SRPX2	85.1493	1.53784	0.471881	3.25895	0.00111827	0.0294738	40.3516	39.0115	90.9881	141.791	113.604
273	ENSG00000198466	ZNF587	149.974	1.38567	0.425989	3.25284	0.00114259	0.0300045	64.5626	87.5591	155.051	269.006	173.692
274	ENSG00000170469	SPATA24	41.6762	2.61565	0.805543	3.24707	0.001166	0.0303966	11.6571	8.66922	36.2096	131.19	20.6553
275	ENSG00000257074	RPL29P33	32.935	3.01507	0.92845	3.24742	0.00116455	0.0303966	11.6571	0.866922	32.4958	98.0612	21.5942
276	ENSG00000164610	RP9	75.8158	1.54645	0.477647	3.23764	0.00120524	0.0313056	32.2813	38.1446	112.342	103.362	92.9488
277	ENSG00000157259	GATAD1	229.061	1.35428	0.41912	3.23125	0.00123252	0.031784	127.332	109.232	298.961	426.699	183.081
278	ENSG00000231500	RPS18	417.717	-1.1836	0.366263	-3.23156	0.00123116	0.031784	794.478	463.803	348.169	246.478	235.658
279	ENSG00000198157	HMGN5	52.3196	1.94559	0.602724	3.22799	0.00124661	0.0320322	10.7604	27.7415	59.4208	84.8097	78.8656
280	ENSG00000151012	SLC7A11	388.38	1.09297	0.338826	3.22576	0.00125637	0.0321675	225.072	237.537	447.513	412.122	619.658
281	ENSG00000083099	LYRM2	295.448	1.33544	0.414365	3.22286	0.00126917	0.0323394	140.782	168.183	596.065	262.38	309.829
282	ENSG00000101182	PSMA7	1610.92	1.00376	0.312115	3.21599	0.00129995	0.0323394	996.237	1013.43	2463.18	2080.49	1501.26
283	ENSG00000108840	HDAC5	47.3918	2.23639	0.694805	3.21874	0.00128757	0.0323394	19.7275	9.53614	33.4242	117.938	56.3326
284	ENSG00000110583	NAA40	57.9981	1.76801	0.549795	3.21577	0.00130096	0.0323394	18.8308	28.6084	97.4873	82.1594	62.9047
285	ENSG00000114439	BBX	748.542	1.16803	0.363398	3.21418	0.00130819	0.0323394	449.248	406.586	663.842	1387.43	835.6
286	ENSG00000166341	DCHS1	93.3516	1.64102	0.509636	3.21998	0.00128198	0.0323394	40.3516	41.6122	116.985	190.822	76.9879
287	ENSG00000169679	BUB1	87.8105	-1.46305	0.455009	-3.21544	0.00130245	0.0323394	140.782	143.909	63.1346	42.4048	48.8216
288	ENSG00000176853	FAM91A1	46.8677	-1.87924	0.584168	-3.21696	0.00129558	0.0323394	87.8769	78.8899	31.5673	17.227	18.7775
289	ENSG00000205940	HSP90AB2P	110.483	1.73868	0.539928	3.22021	0.00128095	0.0323394	45.7318	45.9469	80.7752	266.355	113.604
290	ENSG00000269244	RPL23AP78	53.2259	2.57833	0.802039	3.21472	0.00130571	0.0323394	17.9341	8.66922	35.2811	178.895	25.3497
291	ENSG00000140564	FURIN	263.024	1.42427	0.443434	3.21191	0.00131855	0.0324835	140.782	120.502	196.831	556.564	300.44
292	ENSG00000136819	C9orf78	237.996	1.24961	0.389862	3.20527	0.00134937	0.0331288	139.886	120.502	346.312	377.668	205.614
293	ENSG00000172840	PDP2	84.1858	1.55618	0.486793	3.19681	0.00138956	0.0339991	39.4549	38.1446	87.2743	153.718	102.338
294	ENSG00000130227	XPO7	364.177	1.16836	0.36638	3.18892	0.00142803	0.0348216	182.031	234.069	369.523	633.422	401.839
295	ENSG00000175063	UBE2C	66.9162	-1.76286	0.553157	-3.1869	0.00143804	0.0349468	134.505	97.9622	53.8501	23.8527	24.4108
296	ENSG00000259531	0	28.0853	2.67146	0.839869	3.1808	0.00146869	0.0355712	6.27692	6.93537	30.6389	76.8588	19.7164
297	ENSG00000138107	ACTR1A	877.051	1.14227	0.359809	3.17466	0.00150011	0.0362098	462.699	553.963	848.604	1629.94	890.055
298	ENSG00000111667	USP5	286.812	1.48513	0.468152	3.17231	0.00151229	0.0363812	121.952	153.445	189.404	645.349	323.912
299	ENSG00000152291	TGOLN2	1193	1.13582	0.358172	3.17117	0.00151827	0.036403	739.78	648.457	1842.05	1828.71	906.016
300	ENSG00000075340	ADD2	27.8884	3.02359	0.955251	3.16523	0.00154959	0.0365428	1.79341	8.66922	15.7837	88.7851	24.4108
301	ENSG00000119812	FAM98A	671.726	1.17469	0.370936	3.16683	0.00154109	0.0365428	306.672	458.602	573.782	1166.13	853.439
302	ENSG00000171467	ZNF318	255.524	1.29355	0.408642	3.16548	0.00154825	0.0365428	121.055	151.711	306.389	479.705	218.758
303	ENSG00000180211	0	30.392	2.79194	0.881477	3.16734	0.00153842	0.0365428	8.96703	4.33461	49.2079	78.1839	11.2665
304	ENSG00000258741	H2AZ2P1	23.9807	2.77652	0.876662	3.16715	0.00153941	0.0365428	4.48351	6.06845	23.2113	63.6073	22.533
305	ENSG00000214087	ARL16	51.3322	2.37221	0.749691	3.16426	0.0015548	0.0365454	15.2439	13.8707	35.2811	160.343	31.9218
306	ENSG00000020129	NCDN	322.378	1.13236	0.358478	3.15879	0.00158426	0.0369954	140.782	234.936	363.953	441.275	430.944
307	ENSG00000166147	FBN1	2052.42	1.34501	0.425756	3.1591	0.00158257	0.0369954	1151.37	981.355	1773.34	4737.42	1618.62
308	ENSG00000159140	SON	1525.57	1.15083	0.364714	3.15542	0.00160266	0.0373034	836.623	924.139	1505.02	2953.76	1408.31
309	ENSG00000232864	NUCKS1P1	26.399	2.68163	0.850183	3.15418	0.00160949	0.0373411	6.27692	6.06845	30.6389	70.233	18.7775
310	ENSG00000147164	SNX12	264.603	1.28167	0.407251	3.14713	0.00164879	0.0381296	128.228	156.046	233.969	506.208	298.563
311	ENSG00000006756	ARSD	57.6478	2.05215	0.653586	3.13983	0.00169044	0.0387681	21.5209	18.2054	51.9932	152.392	44.1272
312	ENSG00000099337	KCNK6	45.2683	1.8572	0.591387	3.1404	0.00168715	0.0387681	15.2439	19.9392	76.1329	59.6318	55.3937
313	ENSG00000132589	FLOT2	274.843	1.38968	0.442649	3.13946	0.00169262	0.0387681	157.82	120.502	286.891	588.367	220.636
314	ENSG00000197744	PTMAP2	116.412	1.63534	0.521097	3.13825	0.00169958	0.0388034	33.178	69.3537	99.3442	247.803	132.382
315	ENSG00000179031	NSA2P3	120.852	1.75297	0.558814	3.13695	0.00170716	0.0388528	44.8351	54.6161	84.489	311.411	108.91
316	ENSG00000170345	FOS	35.3363	2.21815	0.708768	3.12958	0.00175057	0.0397146	10.7604	11.27	31.5673	80.8342	42.2494
317	ENSG00000105640	RPL18A	302.128	1.64177	0.52516	3.12623	0.00177065	0.0397201	166.787	98.8291	346.312	744.735	153.976
318	ENSG00000132635	PCED1A	213.891	1.22299	0.39105	3.12745	0.00176331	0.0397201	121.055	116.168	237.683	377.668	216.88
319	ENSG00000143033	MTF2	148.841	1.40724	0.450091	3.12657	0.00176856	0.0397201	79.8065	69.3537	164.336	295.509	135.198
320	ENSG00000179222	MAGED1	415.822	1.28393	0.410747	3.12584	0.00177297	0.0397201	260.044	186.388	412.232	846.772	373.673
321	ENSG00000142687	KIAA0319L	141.276	1.28978	0.413794	3.11697	0.00182721	0.0406795	61.8725	89.2929	191.261	214.675	149.281
322	ENSG00000156603	MED19	237.4	1.29334	0.415057	3.11606	0.00183282	0.0406795	118.365	135.24	366.738	388.269	178.387
323	ENSG00000226144	RPS27AP3	74.9102	2.24141	0.719161	3.1167	0.0018289	0.0406795	31.3846	14.7377	64.9915	230.576	32.8607
324	ENSG00000026025	VIM	7289.24	-0.841774	0.270314	-3.11406	0.0018453	0.04083	9722.05	10118.7	6060	5543.11	5002.33
325	ENSG00000102317	RBM3	633.93	1.31079	0.421692	3.10841	0.00188099	0.0414917	355.094	316.426	1347.18	704.98	445.966
326	ENSG00000213020	ZNF611	109.443	1.57233	0.50637	3.10511	0.00190211	0.0418289	60.9758	39.0115	133.697	225.276	88.2544
327	ENSG00000058091	CDK14	280.918	1.23106	0.396826	3.10228	0.00192038	0.0419633	152.439	157.78	266.465	534.036	293.868
328	ENSG00000116285	ERRFI1	48.4845	-2.26142	0.729159	-3.1014	0.00192606	0.0419633	94.1538	91.0268	41.7803	7.95091	7.51101
329	ENSG00000127022	CANX	3689.22	1.02947	0.332028	3.10055	0.00193163	0.0419633	2340.39	2200.25	3843.78	6511.79	3549.89
330	ENSG00000138032	PPM1B	72.2625	1.91933	0.61885	3.10144	0.00192581	0.0419633	31.3846	22.54	51.0648	186.846	69.4769
331	ENSG00000113083	LOX	270.457	-1.19122	0.384634	-3.09701	0.00195483	0.0423388	453.731	363.24	244.182	125.889	165.242
332	ENSG00000162063	CCNF	198.091	1.35017	0.43637	3.09409	0.0019742	0.0426297	119.261	85.8253	280.392	353.815	151.159
333	ENSG00000245532	NEAT1	1075.23	0.881511	0.285124	3.09168	0.00199027	0.0428476	755.92	672.731	1277.55	1252.27	1417.7
334	ENSG00000218739	CEBPZOS	97.9109	1.38198	0.447268	3.08983	0.00200274	0.042987	47.5252	52.0153	115.128	160.343	114.543
335	ENSG00000148303	RPL7A	504.048	-1.00449	0.325407	-3.08687	0.00202273	0.0430225	812.413	630.252	424.302	302.134	351.14
336	ENSG00000150961	SEC24D	276.717	1.23202	0.399111	3.08692	0.00202244	0.0430225	138.092	167.316	262.751	523.435	291.991
337	ENSG00000177954	RPS27	939.197	1.28654	0.416585	3.08831	0.00201298	0.0430225	574.786	432.594	877.386	2046.03	765.184
338	ENSG00000196498	NCOR2	719.408	1.25919	0.408029	3.08604	0.0020284	0.0430225	371.235	411.788	578.425	1523.92	711.668
339	ENSG00000116918	TSNAX	109.85	1.4761	0.479585	3.07786	0.00208491	0.043961	57.389	48.5476	138.339	212.024	92.9488
340	ENSG00000196924	FLNA	7151.26	0.913528	0.296801	3.07791	0.00208458	0.043961	4154.42	5191.99	7403.46	10744.3	8262.11
341	ENSG00000177663	IL17RA	212.621	1.15841	0.376636	3.07568	0.00210025	0.0441544	112.985	131.772	311.959	204.073	302.318
342	ENSG00000134371	CDC73	360.922	1.05696	0.34387	3.07372	0.0021141	0.0443157	227.762	209.795	396.448	579.091	391.511
343	ENSG00000116754	SRSF11	1467.11	0.936871	0.305009	3.07162	0.00212898	0.0444975	863.525	1030.77	1760.34	2198.43	1482.49
344	ENSG00000177425	PAWR	237.901	1.13962	0.371395	3.0685	0.00215137	0.0448076	139.886	136.107	283.177	390.92	239.413
345	ENSG00000266066	POLRMTP1	28.5292	3.31329	1.08002	3.06781	0.00215631	0.0448076	8.07032	0.866922	7.4276	104.687	21.5942
346	ENSG00000114346	ECT2	75.2181	-1.64928	0.538469	-3.06291	0.00219195	0.0454164	138.092	117.034	62.2062	21.2024	37.5551
347	ENSG00000120594	PLXDC2	35.186	2.67766	0.875678	3.05781	0.00222958	0.0455382	0.896703	15.6046	24.1397	80.8342	54.4548
348	ENSG00000137207	YIPF3	189.528	1.32672	0.43383	3.05815	0.00222705	0.0455382	106.708	91.8937	170.835	376.343	201.858
349	ENSG00000164366	CCDC127	109.311	1.53587	0.502241	3.05804	0.00222787	0.0455382	39.4549	62.4184	90.0597	221.3	133.32
350	ENSG00000213791	0	1565.56	2.6247	0.857686	3.06021	0.00221181	0.0455382	541.608	221.932	1633.14	4327.94	1103.18
351	ENSG00000227836	0	1661.83	2.62282	0.857117	3.06005	0.002213	0.0455382	442.971	368.442	1192.13	5002.45	1303.16
352	ENSG00000163453	IGFBP7	121.476	-1.5004	0.491046	-3.05552	0.0022467	0.0456277	233.143	164.715	93.7735	33.1288	82.6211
353	ENSG00000204599	TRIM39	58.8681	1.87237	0.612778	3.05554	0.00224656	0.0456277	29.5912	15.6046	64.9915	132.515	51.6382
354	ENSG00000148660	CAMK2G	102.372	1.39797	0.457764	3.05391	0.0022588	0.0456948	51.112	52.0153	100.273	178.895	129.565
355	ENSG00000226242	RPS17P8	519.515	2.88952	0.946333	3.05339	0.00226275	0.0456948	137.195	77.156	395.52	1636.56	351.14
356	ENSG00000115738	ID2	78.9206	2.13687	0.701055	3.04808	0.00230311	0.0463792	27.7978	24.2738	57.5639	37.1042	247.863
357	ENSG00000113657	DPYSL3	655.544	1.27956	0.420072	3.04606	0.00231861	0.0465606	285.151	420.457	542.215	1398.03	631.864
358	ENSG00000087266	SH3BP2	98.3661	2.13663	0.702489	3.04151	0.00235396	0.0469765	38.5582	26.0077	104.915	294.184	28.1663
359	ENSG00000096384	HSP90AB1	11082.6	0.882905	0.290191	3.04249	0.00234627	0.0469765	6367.48	8345.86	15059.5	14289.1	11351
360	ENSG00000107521	HPS1	181.06	1.13231	0.372617	3.03881	0.00237516	0.0469765	95.9472	115.301	241.397	200.098	252.558
361	ENSG00000168899	VAMP5	219.312	1.56877	0.516321	3.03837	0.00237864	0.0469765	121.952	78.8899	177.334	551.263	167.12
362	ENSG00000187109	NAP1L1	1516.52	1.09027	0.358573	3.04058	0.00236125	0.0469765	834.83	972.686	1728.77	2778.84	1267.48
363	ENSG00000231084	RPL22P24	44.282	2.3929	0.787187	3.03981	0.0023673	0.0469765	16.1406	8.66922	32.4958	137.816	26.2885
364	ENSG00000162191	UBXN1	393.941	1.0374	0.341614	3.03677	0.00239124	0.0470957	199.965	282.616	464.225	591.017	431.883
365	ENSG00000213787	RPL7AP38	1076.49	2.89973	0.955406	3.03507	0.00240476	0.0472321	289.635	151.711	1012.01	3330.11	599.003
366	ENSG00000149091	DGKZ	136.866	1.38058	0.455107	3.03352	0.00241717	0.0473461	65.4593	73.6884	139.268	271.656	134.259
367	ENSG00000005073	HOXA11	113.484	1.27496	0.42074	3.03027	0.00244335	0.0476641	62.7692	59.8176	171.763	144.441	128.626
368	ENSG00000177363	LRRN4CL	32.2827	2.44597	0.807508	3.02904	0.00245335	0.0476641	4.48351	13.0038	47.351	76.8588	19.7164
369	ENSG00000235685	0	23.8434	2.90082	0.957419	3.02983	0.00244691	0.0476641	4.48351	5.20153	16.7121	76.8588	15.9609
370	ENSG00000011105	TSPAN9	119.662	1.71643	0.566889	3.02781	0.00246333	0.0477286	52.9055	47.6807	80.7752	312.736	104.215
371	ENSG00000128829	EIF2AK4	395.992	0.947893	0.313305	3.02546	0.00248253	0.0478421	246.593	261.81	494.864	519.459	457.233
372	ENSG00000224155	0	45.2071	2.16857	0.716638	3.02602	0.00247792	0.0478421	13.4505	15.6046	63.1346	111.313	22.533
373	ENSG00000129255	MPDU1	120.49	1.37928	0.456921	3.01864	0.00253911	0.0488014	64.5626	58.0838	104.915	219.975	154.915
374	ENSG00000100626	GALNT16	108.164	1.67746	0.556235	3.01574	0.00256356	0.0488438	60.0791	32.943	91.9166	261.055	94.8265
375	ENSG00000129515	SNX6	186.433	-1.0891	0.361055	-3.01643	0.00255768	0.0488438	281.565	265.278	120.699	121.914	142.709
376	ENSG00000230629	RPS23P8	382.076	1.41911	0.470406	3.01678	0.00255471	0.0488438	163.2	217.597	214.472	826.894	488.216
377	ENSG00000241282	RPL34P33	39.0825	2.45835	0.815334	3.01514	0.00256857	0.0488438	5.38022	15.6046	35.2811	116.613	22.533
378	ENSG00000187840	EIF4EBP1	272.113	1.5053	0.499756	3.01208	0.00259467	0.0490797	156.923	101.43	233.969	669.201	199.042
379	ENSG00000198712	MT-CO2	3710.89	-1.0489	0.348225	-3.01214	0.0025941	0.0490797	6224.01	4533.13	3693.38	1868.46	2235.46
380	ENSG00000175203	DCTN2	549.435	0.939106	0.312278	3.00728	0.00263599	0.0496471	371.235	337.233	605.35	797.741	635.619
381	ENSG00000244509	APOBEC3C	642.174	1.2505	0.415866	3.00699	0.00263852	0.0496471	339.85	362.373	666.627	1362.26	479.766
382	ENSG00000049618	ARID1B	270.572	1.06184	0.353368	3.00491	0.0026566	0.0497263	165.89	161.247	298.033	425.374	302.318
383	ENSG00000237450	RPL23AP71	43.0499	2.34431	0.780116	3.00508	0.00265513	0.0497263	17.9341	6.93537	25.9966	125.889	38.4939
384	ENSG00000142541	RPL13A	1885.91	0.852558	0.284088	3.00104	0.00269061	0.0501304	1433.83	1108.79	2215.28	2389.25	2282.41
385	ENSG00000143183	TMCO1	500.34	0.937156	0.312296	3.00086	0.00269218	0.0501304	311.156	334.632	552.428	712.931	590.553
386	ENSG00000175155	YPEL2	33.5945	2.41844	0.806577	2.9984	0.00271402	0.0504062	8.96703	9.53614	35.2811	95.4109	18.7775
387	ENSG00000169871	TRIM56	251.401	1.23351	0.411744	2.99582	0.00273703	0.0507023	124.642	152.578	281.32	479.705	218.758
388	ENSG00000233514	0	43.492	2.42647	0.810411	2.99412	0.00275237	0.050855	13.4505	10.4031	33.4242	140.466	19.7164
389	ENSG00000121440	PDZRN3	54.5554	1.65247	0.552199	2.99253	0.00276678	0.0508591	26.0044	21.673	82.6321	86.1348	56.3326
390	ENSG00000166313	APBB1	60.8504	1.65908	0.554392	2.99261	0.00276603	0.0508591	26.0044	26.8746	53.8501	113.963	83.56
391	ENSG00000275052	PPP4R3B	167.539	1.47101	0.491743	2.99141	0.00277688	0.0509142	75.323	86.6922	181.976	376.343	117.36
392	ENSG00000130522	JUND	312.694	1.24938	0.418566	2.98491	0.00283661	0.0518767	167.683	174.251	246.968	628.122	346.445
393	ENSG00000131507	NDFIP1	356.708	1.23653	0.414484	2.98331	0.00285153	0.0520169	212.519	180.32	323.101	731.483	336.118
394	ENSG00000067182	TNFRSF1A	346.178	1.10512	0.37067	2.98141	0.00286926	0.0522074	178.444	230.601	339.813	598.968	383.062
395	ENSG00000151461	UPF2	263.207	1.06845	0.358483	2.98047	0.0028781	0.0522357	141.679	175.985	396.448	267.681	334.24
396	ENSG00000187173	LCE2A	185.085	-1.48274	0.497813	-2.97851	0.00289655	0.0524378	303.085	299.955	194.046	56.9815	71.3546
397	ENSG00000002586	CD99	225.458	-1.20938	0.406143	-2.97772	0.00290397	0.0524397	415.173	268.746	198.688	140.466	104.215
398	ENSG00000119707	RBM25	1530.68	0.918195	0.308836	2.97309	0.00294823	0.0531051	829.45	1166.01	1786.34	2234.21	1637.4
399	ENSG00000173692	PSMD1	1027.03	0.979796	0.32966	2.97214	0.00295732	0.0531354	626.795	670.131	1341.61	1598.13	898.505
400	ENSG00000132254	ARFIP2	117.674	1.38711	0.467326	2.96818	0.00299565	0.0536895	66.356	52.8822	105.843	225.276	138.015
401	ENSG00000126457	PRMT1	745.837	1.19293	0.402288	2.96535	0.00302335	0.0539163	431.314	410.054	615.563	1553.08	719.179
402	ENSG00000164880	INTS1	26.3914	2.39233	0.806745	2.96541	0.00302283	0.0539163	5.38022	9.53614	42.7087	19.8773	54.4548
403	ENSG00000198225	FKBP1C	155.057	1.49556	0.504758	2.96292	0.00304731	0.0542089	66.356	81.4906	120.699	363.091	143.648
404	ENSG00000048740	CELF2	98.8842	1.48186	0.501126	2.95705	0.00310598	0.0551158	40.3516	54.6161	90.0597	201.423	107.971
405	ENSG00000080503	SMARCA2	600.227	1.13877	0.386269	2.94812	0.00319712	0.0564536	364.061	332.898	677.769	1147.58	478.827
406	ENSG00000178695	KCTD12	112.975	1.43907	0.488124	2.94816	0.00319672	0.0564536	58.2857	52.8822	97.4873	233.227	122.993
407	ENSG00000213089	PDCL3P5	26.838	2.40672	0.817475	2.94409	0.0032391	0.0570542	4.48351	10.4031	22.2828	62.2821	34.7384
408	ENSG00000101966	XIAP	254.987	1.14401	0.38994	2.9338	0.00334838	0.0588347	122.848	172.517	406.661	348.515	224.391
409	ENSG00000127616	SMARCA4	879.798	0.902769	0.308084	2.93027	0.00338664	0.0589292	529.055	626.784	950.733	1306.6	985.82
410	ENSG00000140259	MFAP1	455.612	0.965769	0.329359	2.93227	0.0033649	0.0589292	243.903	335.499	501.363	654.625	542.671
411	ENSG00000174917	MICOS13	48.0616	1.86462	0.636072	2.93146	0.00337376	0.0589292	17.9341	19.0723	51.0648	109.988	42.2494
412	ENSG00000184009	ACTG1	7359.99	1.00826	0.344058	2.9305	0.0033842	0.0589292	4860.13	4299.93	5735.04	12358.4	9546.49
413	ENSG00000197312	DDI2	144.025	1.14468	0.391246	2.92572	0.00343657	0.059509	87.8769	78.8899	194.975	198.773	159.609
414	ENSG00000204681	GABBR1	108.879	1.29897	0.44387	2.92647	0.0034283	0.059509	45.7318	70.2207	116.056	153.718	158.67
415	ENSG00000196227	FAM217B	113.6	1.47595	0.50503	2.9225	0.00347236	0.059984	60.9758	48.5476	129.983	241.178	87.3155
416	ENSG00000226532	0	1233.27	1.26836	0.435189	2.9145	0.00356261	0.0613951	735.296	600.777	906.168	2826.55	1097.55
417	ENSG00000187583	PLEKHN1	58.2001	1.88827	0.648241	2.91291	0.00358073	0.0615594	26.0044	18.2054	52.9217	149.742	44.1272
418	ENSG00000117519	CNN3	223.621	1.32416	0.455221	2.90883	0.00362784	0.0622201	121.952	112.7	203.331	487.656	192.47
419	ENSG00000143702	CEP170	122.714	-1.20592	0.414691	-2.90799	0.00363757	0.062238	201.758	169.917	91.9166	86.1348	63.8436
420	ENSG00000010292	NCAPD2	66.8535	-1.55483	0.534814	-2.90724	0.00364636	0.0622399	127.332	94.4945	53.8501	23.8527	34.7384
421	ENSG00000103035	PSMD7	280.302	1.10509	0.38022	2.90644	0.00365564	0.06225	112.985	218.464	324.958	372.368	372.734
422	ENSG00000008513	ST3GAL1	128.616	1.25875	0.433685	2.90245	0.00370254	0.0626429	63.6659	76.2891	187.547	200.098	115.482
423	ENSG00000109332	UBE2D3	928.757	1.08166	0.372698	2.90225	0.00370492	0.0626429	612.448	499.347	847.675	1771.73	912.588
424	ENSG00000168297	PXK	281.778	1.09298	0.376527	2.9028	0.00369846	0.0626429	130.919	204.594	296.176	324.662	452.538
425	ENSG00000130449	ZSWIM6	167.47	1.34858	0.465016	2.90007	0.00373079	0.062784	77.1164	96.2283	125.341	340.564	198.103
426	ENSG00000266289	LINC02933	24.5479	2.6777	0.923263	2.90026	0.00372856	0.062784	7.17362	4.33461	12.9983	72.8833	25.3497
427	ENSG00000149269	PAK1	347.073	1.19335	0.411613	2.8992	0.00374114	0.0628108	189.204	201.993	361.167	695.704	287.296
428	ENSG00000209082	MT-TL1	225.636	-1.05955	0.365875	-2.89592	0.00378048	0.063323	349.714	306.89	151.337	125.889	194.347
429	ENSG00000189320	FAM180A	69.2599	-1.50931	0.521474	-2.89431	0.0037999	0.0635	135.402	91.8937	39.9234	26.503	52.5771
430	ENSG00000005483	KMT2E	688.972	0.973164	0.337468	2.88372	0.00393002	0.0652532	436.694	436.062	686.125	1155.53	730.446
431	ENSG00000127952	STYXL1	108.13	1.21408	0.421067	2.88333	0.00393493	0.0652532	55.5956	65.0191	142.053	148.417	129.565
432	ENSG00000132424	PNISR	668.983	1.00848	0.349804	2.88299	0.00393925	0.0652532	410.69	421.324	607.207	1155.53	750.162
433	ENSG00000203914	HSP90B3P	58.7531	1.6312	0.565835	2.88283	0.00394122	0.0652532	20.6242	31.2092	58.4924	113.963	69.4769
434	ENSG00000084623	EIF3I	316.092	1.09733	0.38081	2.88158	0.00395688	0.0653615	163.2	212.396	557.07	344.539	303.257
435	ENSG00000124831	LRRFIP1	1176.74	0.891174	0.309379	2.88052	0.00397015	0.06543	748.747	807.104	1807.69	1327.8	1192.37
436	ENSG00000147862	NFIB	43.6618	1.96654	0.683115	2.87878	0.00399212	0.0656411	12.5538	19.0723	40.8518	107.337	38.4939
437	ENSG00000117222	RBBP5	136.328	1.23717	0.429865	2.87805	0.00400143	0.0656436	64.5626	85.8253	236.755	147.092	147.404
438	ENSG00000147419	CCDC25	337.346	1.11464	0.388172	2.87151	0.00408515	0.0665601	197.275	199.392	435.443	587.042	267.58
439	ENSG00000163661	PTX3	55.672	-1.71691	0.597812	-2.87199	0.00407894	0.0665601	89.6703	101.43	43.6372	30.4785	13.1443
440	ENSG00000167670	CHAF1A	339.515	1.34907	0.469739	2.87196	0.00407938	0.0665601	148.853	202.86	451.227	704.98	189.653
441	ENSG00000081189	MEF2C	69.6076	1.50807	0.526004	2.86703	0.00414341	0.0670357	27.7978	38.1446	62.2062	116.613	103.276
442	ENSG00000105245	NUMBL	57.4021	1.52683	0.532732	2.86603	0.00415653	0.0670357	28.6945	25.1407	71.4907	94.0857	67.5991
443	ENSG00000122741	DCAF10	176.804	1.08254	0.377945	2.86426	0.0041798	0.0670357	106.708	104.898	254.395	235.877	182.142
444	ENSG00000131469	RPL27	501.64	-1.06537	0.371902	-2.86467	0.0041745	0.0670357	798.065	664.062	403.876	209.374	432.822
445	ENSG00000134294	SLC38A2	1040.76	0.888554	0.310151	2.86491	0.00417127	0.0670357	752.333	625.051	1063.08	1559.7	1203.64
446	ENSG00000169621	APLF	70.4964	1.82438	0.636607	2.86579	0.00415965	0.0670357	29.5912	26.0077	66.8484	186.846	43.1883
447	ENSG00000197961	ZNF121	175.749	1.41733	0.49473	2.86486	0.00417195	0.0670357	107.604	67.6199	210.758	376.343	116.421
448	ENSG00000088298	EDEM2	44.9468	2.19431	0.766777	2.86174	0.00421327	0.0674217	23.3143	5.20153	62.2062	108.662	25.3497
449	ENSG00000087245	MMP2	713.738	0.925602	0.323765	2.85887	0.00425157	0.0678831	469.872	456.868	664.77	1078.67	898.505
450	ENSG00000230359	TPI1P2	58.2818	1.726	0.604081	2.85724	0.00427344	0.0680806	31.3846	17.3384	50.1363	125.889	66.6602
451	ENSG00000152465	NMT2	390.627	1.14541	0.401746	2.85107	0.00435717	0.0692607	171.27	280.883	642.488	555.238	303.257
452	ENSG00000129038	LOXL1	241.242	1.46516	0.514639	2.84696	0.00441385	0.0700064	134.505	99.696	223.757	598.968	149.281
453	ENSG00000106546	AHR	73.7678	1.51327	0.531816	2.84547	0.00443458	0.07018	34.0747	35.5438	61.2777	143.116	94.8265
454	ENSG00000155393	HEATR3	102.265	1.70778	0.600433	2.84425	0.00445167	0.0702952	42.145	44.213	93.7735	272.981	58.2103
455	ENSG00000163431	LMOD1	62.9609	1.61088	0.566721	2.84245	0.00447679	0.070487	24.211	32.0761	47.351	106.012	105.154
456	ENSG00000236549	RPS27AP7	29.1988	2.71852	0.956561	2.84198	0.00448348	0.070487	10.7604	2.60077	14.8552	98.0612	19.7164
457	ENSG00000115234	SNX17	255.924	1.00234	0.352921	2.84013	0.00450956	0.0706137	162.303	156.913	287.82	390.92	281.663
458	ENSG00000148337	CIZ1	280.716	1.08582	0.382331	2.84001	0.00451124	0.0706137	168.58	166.449	264.608	496.932	307.013
459	ENSG00000106070	GRB10	70.3276	1.71604	0.605225	2.83538	0.00457707	0.071488	29.5912	29.4753	72.4191	172.27	47.8827
460	ENSG00000198740	ZNF652	89.0159	1.38022	0.4874	2.83181	0.00462861	0.0721358	36.7648	53.7491	109.557	157.693	87.3155
461	ENSG00000100478	AP4S1	33.0978	1.93359	0.683266	2.82993	0.00465587	0.0724033	8.07032	16.4715	42.7087	50.3557	47.8827
462	ENSG00000096433	ITPR3	37.1781	-1.81575	0.6422	-2.82739	0.00469297	0.0727064	57.389	72.8214	23.2113	21.2024	11.2665
463	ENSG00000107372	ZFAND5	232.012	1.22316	0.43264	2.8272	0.00469564	0.0727064	130.919	126.571	155.98	371.042	375.551
464	ENSG00000244422	RPL38P3	44.3155	2.08698	0.738866	2.82457	0.0047344	0.0731485	11.6571	18.2054	39.9234	124.564	27.2274
465	ENSG00000243658	MTND5P16	47.8597	2.36809	0.838796	2.8232	0.00475466	0.0733036	9.86373	17.3384	38.9949	159.018	14.0831
466	ENSG00000074964	ARHGEF10L	47.2471	2.04315	0.724544	2.81992	0.00480364	0.0737415	19.7275	13.0038	47.351	129.865	26.2885
467	ENSG00000129250	KIF1C	801.693	0.955432	0.338788	2.82015	0.00480013	0.0737415	531.745	493.278	933.093	1326.48	723.874
468	ENSG00000111540	RAB5B	116.747	1.19868	0.425299	2.81843	0.00482586	0.0739243	60.0791	71.0876	130.911	185.521	136.137
469	ENSG00000188976	NOC2L	52.4935	1.79212	0.63647	2.81571	0.00486696	0.0743949	16.1406	26.0077	50.1363	123.239	46.9438
470	ENSG00000167535	CACNB3	126.663	1.29331	0.459923	2.81202	0.00492311	0.0748473	74.4263	60.6845	123.484	245.153	129.565
471	ENSG00000172115	CYCS	191.091	-1.10786	0.394016	-2.81171	0.00492787	0.0748473	278.874	285.217	129.055	91.4354	170.875
472	ENSG00000213448	RPS23P2	1185.11	2.80721	0.998033	2.81274	0.00491211	0.0748473	348.817	166.449	947.948	3764.75	697.585
473	ENSG00000177666	PNPLA2	220.32	1.18061	0.420124	2.81015	0.00495188	0.0750528	138.989	110.966	194.975	420.073	236.597
474	ENSG00000244229	RPL26P35	30.0411	2.57488	0.916724	2.80878	0.00497291	0.0752126	8.07032	6.93537	22.2828	100.711	12.2054
475	ENSG00000113141	IK	443.47	1.03332	0.368351	2.80525	0.00502774	0.0754189	211.622	332.898	627.632	654.625	390.573
476	ENSG00000136938	ANP32B	1442.07	0.969405	0.345575	2.80519	0.00502863	0.0754189	756.817	1074.12	1836.47	2317.69	1225.23
477	ENSG00000163644	PPM1K	55.1301	1.57328	0.560752	2.80567	0.00502123	0.0754189	26.9011	23.4069	55.707	102.037	67.5991
478	ENSG00000188706	ZDHHC9	314.987	1.016	0.361993	2.80668	0.00500547	0.0754189	207.138	182.92	326.815	524.76	333.301
479	ENSG00000164924	YWHAZ	965.98	1.01124	0.36097	2.80146	0.00508718	0.0761378	573.89	625.918	963.731	1781	885.36
480	ENSG00000080845	DLGAP4	601.952	1.08676	0.388181	2.79961	0.00511644	0.076298	384.685	333.765	573.782	1176.73	540.793
481	ENSG00000105429	MEGF8	85.7648	1.41756	0.506477	2.79886	0.00512835	0.076298	47.5252	38.1446	157.837	113.963	71.3546
482	ENSG00000142676	RPL11	2994.75	1.18243	0.422534	2.79843	0.00513522	0.076298	1850.79	1548.32	2397.26	6734.42	2442.96
483	ENSG00000176340	COX8A	227.778	-0.984527	0.351856	-2.7981	0.00514045	0.076298	368.545	279.149	158.765	170.945	161.487
484	ENSG00000092841	MYL6	4052.28	0.904172	0.32353	2.79471	0.00519469	0.076785	2821.92	2499.34	4203.09	6805.98	3931.08
485	ENSG00000198695	MT-ND6	987.379	-0.971662	0.347598	-2.79536	0.00518422	0.076785	1562.95	1234.5	494.864	678.477	966.104
486	ENSG00000095380	NANS	217.023	1.19741	0.428618	2.79366	0.0052116	0.0768764	145.266	98.8291	271.108	396.22	173.692
487	ENSG00000153774	CFDP1	129.577	1.47393	0.528537	2.78869	0.00529209	0.0778762	57.389	67.6199	113.271	310.085	99.5209
488	ENSG00000181751	MACIR	62.611	-1.41255	0.506627	-2.78814	0.0053011	0.0778762	104.017	96.2283	30.6389	37.1042	45.0661
489	ENSG00000224025	0	54.2759	2.06454	0.740789	2.78695	0.00532062	0.0780031	21.5209	15.6046	23.2113	160.343	50.6993
490	ENSG00000138180	CEP55	163.143	-1.34528	0.483185	-2.78419	0.00536611	0.0785095	277.081	234.936	104.915	153.718	45.0661
491	ENSG00000122641	INHBA	601.619	1.0177	0.365842	2.7818	0.00540581	0.0789292	364.958	379.712	758.544	1026.99	477.888
492	ENSG00000053372	MRTO4	285.342	1.04757	0.377084	2.77807	0.0054683	0.0791507	157.82	189.856	404.804	431.999	242.23
493	ENSG00000111145	ELK3	519.002	1.11719	0.402163	2.77795	0.00547023	0.0791507	288.738	320.761	582.138	1013.74	389.634
494	ENSG00000151376	ME3	39.0663	1.97748	0.711937	2.7776	0.00547619	0.0791507	11.6571	16.4715	25.0682	91.4354	50.6993
495	ENSG00000167065	DUSP18	36.806	2.21828	0.798083	2.77951	0.00544403	0.0791507	11.6571	11.27	41.7803	103.362	15.9609
496	ENSG00000183978	COA3	196.96	1.17894	0.424079	2.78	0.00543588	0.0791507	102.224	121.369	168.978	369.717	222.514
497	ENSG00000224800	RPS27AP6	1553.2	2.8924	1.04263	2.77414	0.00553483	0.0798375	443.868	195.924	1272.91	5028.95	824.333
498	ENSG00000117448	AKR1A1	160.455	1.16554	0.420549	2.77148	0.00558018	0.0802164	94.1538	89.2929	166.193	290.208	162.426
499	ENSG00000175029	CTBP2	444.17	0.906259	0.327017	2.77129	0.00558348	0.0802164	255.56	326.83	531.074	636.073	471.316
500	ENSG00000139291	TMEM19	39.7454	1.71688	0.620301	2.76781	0.00564342	0.0809154	15.2439	18.2054	59.4208	63.6073	42.2494
501	ENSG00000110955	ATP5F1B	209.351	-1.06946	0.386859	-2.76446	0.00570169	0.0815876	339.85	271.347	181.976	103.362	150.22
502	ENSG00000130176	CNN1	82.5277	1.79672	0.651081	2.7596	0.00578729	0.0824832	34.0747	32.0761	50.1363	237.202	59.1492
503	ENSG00000166913	YWHAB	4452.16	0.77884	0.282213	2.75976	0.00578436	0.0824832	3026.37	3202.41	4634.82	6242.79	5154.43
504	ENSG00000157036	EXOG	119.495	1.28402	0.465699	2.75719	0.00582997	0.0829267	74.4263	53.7491	101.201	216	152.098
505	ENSG00000163811	WDR43	958.745	0.814497	0.295943	2.75221	0.00591941	0.0840322	590.03	727.347	1111.36	1294.67	1070.32
506	ENSG00000132872	SYT4	32.2439	2.26968	0.824931	2.75136	0.00593489	0.0840855	11.6571	7.8023	18.569	94.0857	29.1052
507	ENSG00000081059	TCF7	66.4127	1.4737	0.535835	2.75029	0.00595431	0.0841942	30.4879	33.8099	60.3493	83.4845	123.932
508	ENSG00000164283	ESM1	111.423	-1.1645	0.423947	-2.74681	0.00601781	0.0848107	169.477	164.715	90.0597	59.6318	73.2324
509	ENSG00000239035	SNORD13D	42.9633	2.31404	0.84251	2.7466	0.00602157	0.0848107	2.69011	22.54	27.8535	123.239	38.4939
510	ENSG00000116005	PCYOX1	325.284	1.31647	0.479747	2.7441	0.00606773	0.0848536	173.064	169.917	363.024	735.459	184.959
511	ENSG00000163900	TMEM41A	94.7981	1.27887	0.466082	2.74387	0.00607197	0.0848536	42.145	59.8176	123.484	153.718	94.8265
512	ENSG00000166741	NNMT	251.077	0.990872	0.360984	2.74492	0.00605253	0.0848536	158.716	156.913	314.745	243.828	381.184
513	ENSG00000178999	AURKB	93.6916	-1.32065	0.481194	-2.74452	0.00606001	0.0848536	173.96	118.768	77.9898	58.3067	39.4328
514	ENSG00000147065	MSN	2772.04	0.926493	0.337936	2.74162	0.00611368	0.0852295	1545.02	2053.74	3816.86	4194.1	2250.49
515	ENSG00000182117	NOP10	58.8748	-1.61218	0.588141	-2.74114	0.00612264	0.0852295	135.402	62.4184	47.351	23.8527	25.3497
516	ENSG00000185909	KLHDC8B	48.8755	1.81228	0.661819	2.73833	0.00617528	0.0857957	19.7275	19.0723	54.7786	117.938	32.8607
517	ENSG00000167978	SRRM2	1292.57	1.00839	0.36838	2.73736	0.00619343	0.0858814	834.83	773.294	1513.37	2350.82	990.515
518	ENSG00000109881	CCDC34	240.744	1.19446	0.436769	2.73476	0.00624264	0.0863966	123.745	147.377	293.39	466.453	172.753
519	ENSG00000157823	AP3S2	94.2651	1.77353	0.64978	2.72944	0.00634424	0.0876336	35.8681	40.7453	77.9898	271.656	45.0661
520	ENSG00000148773	MKI67	729.662	-1.02344	0.375115	-2.72834	0.00636534	0.087756	1009.69	1089.72	743.689	491.631	313.585
521	ENSG00000146007	ZMAT2	589.312	0.871216	0.319427	2.72743	0.00638299	0.0878305	328.193	458.602	728.834	799.066	631.864
522	ENSG00000247596	TWF2	46.5853	-1.58537	0.581421	-2.72672	0.00639675	0.0878511	77.1164	78.023	16.7121	29.1533	31.9218
523	ENSG00000102225	CDK16	400.26	0.95964	0.352287	2.72403	0.00644903	0.0879322	255.56	254.875	380.665	658.6	451.6
524	ENSG00000146376	ARHGAP18	269.837	-0.912682	0.33506	-2.72393	0.00645095	0.0879322	349.714	401.385	215.4	185.521	197.164
525	ENSG00000150093	ITGB1	599.204	-0.880811	0.323232	-2.72501	0.00642994	0.0879322	842.9	808.838	564.498	365.742	414.044
526	ENSG00000159840	ZYX	99.7699	-1.64029	0.602187	-2.72389	0.00645171	0.0879322	236.729	100.563	101.201	33.1288	27.2274
527	ENSG00000169715	MT1E	370.74	-0.873832	0.320939	-2.72273	0.0064744	0.088074	554.162	465.537	289.677	250.454	293.868
528	ENSG00000011009	LYPLA2	144.746	1.17814	0.432929	2.72133	0.00650191	0.0882807	97.7406	66.753	186.619	241.178	131.443
529	ENSG00000106443	PHF14	154.283	1.38482	0.509561	2.71766	0.00657445	0.0890968	64.5626	91.8937	140.196	356.466	118.298
530	ENSG00000135940	COX5B	596.207	1.07702	0.396582	2.71576	0.00661247	0.0893057	392.756	322.495	545	1184.69	536.098
531	ENSG00000175213	ZNF408	42.8666	1.76988	0.651737	2.71564	0.00661478	0.0893057	9.86373	25.1407	42.7087	59.6318	76.9879
532	ENSG00000038427	VCAN	287.148	1.19274	0.439738	2.71238	0.00668024	0.09002	165.89	157.78	233.041	609.57	269.458
533	ENSG00000175854	SWI5	160.414	1.15084	0.424408	2.71164	0.00669508	0.0900507	65.4593	119.635	160.622	216	240.352
534	ENSG00000105849	POLR1F	197.564	1.05693	0.390163	2.70894	0.00674992	0.0906183	86.9801	152.578	246.968	270.331	230.964
535	ENSG00000179632	MAF1	276.274	1.08146	0.399547	2.70671	0.00679534	0.0910576	161.406	169.05	305.46	508.858	236.597
536	ENSG00000152056	AP1S3	85.8585	1.56484	0.578287	2.70599	0.00681005	0.0910844	23.3143	55.483	147.624	148.417	54.4548
537	ENSG00000041357	PSMA4	708.364	0.836007	0.309277	2.7031	0.00686955	0.0917091	410.69	552.229	917.309	901.103	760.49
538	ENSG00000210184	MT-TS2	71.8334	-1.31182	0.485695	-2.70091	0.00691497	0.0921438	108.501	115.301	52.9217	47.7054	34.7384
539	ENSG00000052802	MSMO1	232.199	1.01066	0.374539	2.6984	0.00696738	0.0922517	144.369	143.909	227.47	377.668	267.58
540	ENSG00000101412	E2F1	155.657	1.24032	0.459576	2.69883	0.00695836	0.0922517	80.7032	90.1599	148.552	318.036	140.831
541	ENSG00000115053	NCL	5242.33	1.00933	0.374093	2.69806	0.00697453	0.0922517	2501.8	4019.05	7758.13	8182.81	3749.87
542	ENSG00000130312	MRPL34	137.566	1.48209	0.549024	2.6995	0.00694438	0.0922517	62.7692	69.3537	110.486	348.515	96.7043
543	ENSG00000116497	S100PBP	100.204	1.6032	0.594361	2.69735	0.00698936	0.0922776	42.145	47.6807	90.9881	261.055	59.1492
544	ENSG00000134352	IL6ST	229.669	-0.993867	0.368838	-2.69459	0.00704753	0.0928375	368.545	286.951	204.259	136.491	152.098
545	ENSG00000162614	NEXN	971.788	0.86782	0.322117	2.69411	0.00705767	0.0928375	567.613	732.549	960.018	1107.83	1490.94
546	ENSG00000151413	NUBPL	89.5251	1.34977	0.502172	2.68786	0.00719123	0.0944211	45.7318	46.8138	107.7	172.27	75.1101
547	ENSG00000117640	MTFR1L	103.894	1.28621	0.479358	2.68319	0.00729228	0.0953985	64.5626	46.8138	83.5605	169.619	154.915
548	ENSG00000154146	NRGN	76.8003	1.49875	0.558527	2.6834	0.00728777	0.0953985	31.3846	41.6122	68.7053	170.945	71.3546
549	ENSG00000087191	PSMC5	629.328	0.972906	0.362803	2.68164	0.00732625	0.0956682	380.202	416.989	615.563	1133	600.881
550	ENSG00000088888	MAVS	421.378	1.14716	0.428092	2.67971	0.00736853	0.0958712	255.56	231.468	531.074	820.269	268.519
551	ENSG00000249992	TMEM158	1044.48	-0.792214	0.295594	-2.68007	0.00736068	0.0958712	1469.7	1328.99	943.306	765.937	714.485
552	ENSG00000118873	RAB3GAP2	264.048	1.12929	0.421654	2.67824	0.00740105	0.0961197	133.609	174.251	249.753	519.459	243.169
553	ENSG00000167770	OTUB1	237.283	1.01491	0.379095	2.67718	0.0074244	0.0962487	158.716	135.24	269.251	392.245	230.964
554	ENSG00000204356	NELFE	427.845	1.00348	0.374967	2.67618	0.00744673	0.0963639	265.424	267.879	450.298	772.563	383.062
555	ENSG00000112773	TENT5A	401.999	0.950792	0.355891	2.67158	0.00754941	0.0974542	267.217	247.94	342.598	609.57	542.671
556	ENSG00000232346	0	36.5498	2.47373	0.926077	2.6712	0.00755817	0.0974542	11.6571	7.8023	18.569	132.515	12.2054
557	ENSG00000007866	TEAD3	78.0976	1.97117	0.739141	2.66683	0.00765701	0.0980234	34.9714	21.673	134.625	184.196	15.022
558	ENSG00000079308	TNS1	129.189	1.36903	0.513345	2.66689	0.00765573	0.0980234	64.5626	67.6199	79.8467	274.306	159.609
559	ENSG00000139318	DUSP6	322.247	-0.972951	0.364733	-2.66757	0.00764016	0.0980234	456.422	456.001	228.399	306.11	164.303
560	ENSG00000179151	EDC3	51.2894	1.77311	0.66477	2.66726	0.00764723	0.0980234	28.6945	13.0038	44.5656	123.239	46.9438
561	ENSG00000100644	HIF1A	952.363	1.05217	0.395444	2.66074	0.00779698	0.0996374	615.138	542.693	821.679	1930.75	851.561
562	ENSG00000129933	MAU2	112.126	1.20815	0.454326	2.65922	0.00783228	0.0998889	67.2527	58.0838	149.481	188.171	97.6431
563	ENSG00000147123	NDUFB11	258.543	0.898213	0.337916	2.65809	0.00785847	0.0998889	174.857	165.582	294.319	347.19	310.768
564	ENSG00000239215	RPL27P12	24.589	2.57153	0.967283	2.65851	0.00784868	0.0998889	4.48351	7.8023	19.4975	80.8342	10.3276
565	ENSG00000198642	KLHL9	64.6473	-1.36356	0.513298	-2.65646	0.00789659	0.0999912	119.261	84.9583	48.2794	39.7545	30.9829
566	ENSG00000231312	MAP4K3-DT	73.8959	1.64645	0.619697	2.65686	0.00788715	0.0999912	16.1406	48.5476	116.056	141.791	46.9438
567	ENSG00000242899	RPL7P16	24.5071	2.55942	0.963652	2.65596	0.00790836	0.0999912	6.27692	6.06845	12.0699	82.1594	15.9609
568	ENSG00000072134	EPN2	60.8972	-1.42685	0.537916	-2.65255	0.00798853	0.100756	98.6373	96.2283	24.1397	51.6809	33.7995
569	ENSG00000119280	C1orf198	79.0298	1.36662	0.51528	2.6522	0.00799694	0.100756	39.4549	41.6122	61.2777	123.239	129.565
570	ENSG00000114302	PRKAR2A	1062.54	0.870796	0.328481	2.65098	0.00802597	0.100944	832.14	586.906	1289.62	1599.46	1004.6
571	ENSG00000169813	HNRNPF	74.0631	-1.53506	0.579455	-2.64915	0.00806942	0.101313	158.716	85.8253	71.4907	25.1779	29.1052
572	ENSG00000115944	COX7A2L	44.473	-1.61646	0.61047	-2.6479	0.0080994	0.101348	92.3604	57.2168	19.4975	18.5521	34.7384
573	ENSG00000117632	STMN1	1081.3	1.018	0.384462	2.64785	0.00810049	0.101348	729.019	609.446	1203.27	2052.66	812.128
574	ENSG00000105677	TMEM147	615.674	0.999972	0.377872	2.64633	0.00813711	0.101513	394.549	374.51	486.508	1122.4	700.402
575	ENSG00000175137	SH3BP5L	105.922	-1.23305	0.465985	-2.64613	0.00814197	0.101513	148.853	174.251	41.7803	75.5336	89.1933
576	ENSG00000204568	MRPS18B	481.459	0.918255	0.347184	2.64487	0.0081723	0.101714	352.404	275.681	778.041	481.03	520.137
577	ENSG00000086015	MAST2	200.016	1.43815	0.543994	2.64369	0.00820086	0.101892	112.088	84.9583	149.481	522.11	131.443
578	ENSG00000143401	ANP32E	400.491	1.05187	0.398253	2.64121	0.00826105	0.102105	218.795	267.879	412.232	764.612	338.934
579	ENSG00000160062	ZBTB8A	45.9428	1.6423	0.622206	2.63948	0.00830341	0.102105	17.0373	23.4069	91.9166	56.9815	40.3717
580	ENSG00000185900	POMK	248.914	1.14474	0.433587	2.64015	0.00828684	0.102105	102.224	186.388	402.947	186.846	366.162
581	ENSG00000214756	CSKMT	34.5032	1.86841	0.707611	2.64045	0.0082795	0.102105	15.2439	11.27	29.7104	76.8588	39.4328
582	ENSG00000236248	0	76.6033	1.75456	0.664652	2.63982	0.00829489	0.102105	43.0417	19.9392	75.2045	205.398	39.4328
583	ENSG00000279483	0	480.232	-1.0613	0.401774	-2.64155	0.00825279	0.102105	954.092	442.13	294.319	450.551	260.069
584	ENSG00000211448	DIO2	41.573	2.20275	0.835792	2.63552	0.00840087	0.103126	10.7604	15.6046	22.2828	21.2024	138.015
585	ENSG00000154277	UCHL1	616.3	0.918312	0.348805	2.63274	0.00846997	0.103797	398.136	404.852	584.924	1049.52	644.069
586	ENSG00000101940	WDR13	173.189	1.27682	0.485711	2.62876	0.00856965	0.104661	79.8065	106.631	200.545	364.417	114.543
587	ENSG00000204371	EHMT2	97.0425	1.20419	0.458048	2.62896	0.00856462	0.104661	39.4549	69.3537	117.913	129.865	128.626
588	ENSG00000130713	EXOSC2	132.186	1.24831	0.475298	2.62637	0.00863013	0.105092	72.6329	71.9545	190.332	235.877	90.1321
589	ENSG00000206560	ANKRD28	71.9559	-1.28854	0.490649	-2.62621	0.00863426	0.105092	133.609	89.2929	51.0648	46.3803	39.4328
590	ENSG00000196159	FAT4	33.5235	1.82626	0.696138	2.62342	0.00870515	0.105713	11.6571	14.7377	32.4958	70.233	38.4939
591	ENSG00000243777	0	338.078	2.55684	0.974762	2.62304	0.00871481	0.105713	113.881	58.0838	263.68	1048.19	206.553
592	ENSG00000145592	RPL37	2119.76	1.07576	0.410575	2.62012	0.00878988	0.106444	1514.53	1031.64	2219.92	4339.87	1492.81
593	ENSG00000005238	FAM214B	94.8234	1.56503	0.597815	2.61791	0.00884689	0.106953	59.1824	27.7415	69.6338	235.877	81.6822
594	ENSG00000205302	SNX2	122.437	1.40836	0.538741	2.61418	0.00894432	0.107949	60.0791	62.4184	98.4157	295.509	95.7654
595	ENSG00000050820	BCAR1	54.1021	-1.45218	0.55622	-2.61081	0.0090328	0.10854	104.017	71.0876	31.5673	22.5276	41.3106
596	ENSG00000149294	NCAM1	51.4912	1.87852	0.719323	2.61151	0.00901426	0.10854	9.86373	29.4753	25.0682	117.938	75.1101
597	ENSG00000151835	SACS	184.284	-1.00065	0.383306	-2.61059	0.00903867	0.10854	288.738	238.403	164.336	106.012	123.932
598	ENSG00000111912	NCOA7	140.18	1.39958	0.53624	2.60998	0.00905464	0.10855	68.1494	72.8214	98.4157	343.214	118.298
599	ENSG00000243304	0	356.566	2.60968	1.00047	2.60847	0.0090949	0.10885	115.675	59.8176	233.041	1133	241.291
600	ENSG00000083857	FAT1	116.188	-1.06426	0.408786	-2.60348	0.00922838	0.11008	182.031	156.046	74.276	88.7851	79.8045
601	ENSG00000138767	CNOT6L	105.378	1.23939	0.47603	2.6036	0.00922496	0.11008	65.4593	50.2815	116.056	197.448	97.6431
602	ENSG00000174851	YIF1A	301.058	0.966207	0.371369	2.60175	0.00927498	0.110452	191.894	190.723	383.45	481.03	258.191
603	ENSG00000184867	ARMCX2	69.5134	1.31647	0.506458	2.59937	0.00933943	0.111035	39.4549	33.8099	67.7769	112.638	93.8876
604	ENSG00000047249	ATP6V1H	88.7038	1.33754	0.51504	2.59697	0.00940514	0.111632	37.6615	54.6161	100.273	174.92	76.049
605	ENSG00000196214	ZNF766	40.9007	1.67526	0.645624	2.59479	0.00946485	0.112155	14.3472	20.8061	45.4941	83.4845	40.3717
606	ENSG00000130935	NOL11	33.3556	-1.73968	0.670922	-2.59296	0.00951526	0.112566	58.2857	57.2168	22.2828	9.27606	19.7164
607	ENSG00000099622	CIRBP	305.76	0.884988	0.341833	2.58895	0.00962686	0.113511	170.373	234.936	376.022	409.472	337.995
608	ENSG00000165891	E2F7	160.342	-1.04755	0.404595	-2.58913	0.00962187	0.113511	234.936	229.734	146.695	108.662	81.6822
609	ENSG00000111962	UST	38.737	1.90829	0.738022	2.58568	0.00971858	0.114217	12.5538	16.4715	25.0682	102.037	37.5551
610	ENSG00000112335	SNX3	116.373	-1.05411	0.40765	-2.58583	0.0097146	0.114217	178.444	159.514	90.0597	76.8588	76.9879
611	ENSG00000122008	POLK	75.3544	-1.26631	0.489905	-2.5848	0.00974364	0.114324	104.017	128.304	40.8518	39.7545	63.8436
612	ENSG00000108179	PPIF	71.7709	-1.23299	0.477743	-2.58087	0.00985505	0.115263	122.848	96.2283	43.6372	46.3803	49.7604
613	ENSG00000137821	LRRC49	51.2018	1.74597	0.676509	2.58085	0.00985583	0.115263	17.9341	24.2738	35.2811	132.515	46.0049
614	ENSG00000183255	PTTG1IP	995.452	0.830919	0.322356	2.57765	0.00994752	0.116146	643.832	712.61	1255.26	1480.19	885.36
615	ENSG00000196642	RABL6	322.789	0.88614	0.34386	2.57704	0.00996508	0.116162	186.514	241.004	381.593	467.778	337.057
616	ENSG00000174206	KICS2	24.9675	2.2722	0.881907	2.57646	0.00998164	0.116166	8.96703	6.06845	22.2828	71.5582	15.9609
617	ENSG00000225830	ERCC6	41.4725	-1.50201	0.584088	-2.57154	0.0101248	0.117641	60.0791	75.4222	23.2113	25.1779	23.4719
618	ENSG00000100075	SLC25A1	233.174	1.02547	0.399299	2.56817	0.0102237	0.118599	138.989	148.244	285.034	400.196	193.409
619	ENSG00000111665	CDCA3	52.2507	-1.72765	0.673572	-2.5649	0.0103205	0.119528	94.1538	84.9583	26.9251	47.7054	7.51101
620	ENSG00000042317	SPATA7	45.0749	1.74834	0.683241	2.55889	0.0105006	0.121418	21.5209	15.6046	38.9949	112.638	36.6162
621	ENSG00000089289	IGBP1	124.404	1.13487	0.443794	2.5572	0.0105519	0.121814	61.8725	83.2245	196.831	107.337	172.753
622	ENSG00000158321	AUTS2	74.5903	1.33973	0.524024	2.55663	0.0105693	0.121818	41.2483	36.4107	57.5639	116.613	121.115
623	ENSG00000063978	RNF4	39.9468	1.89845	0.74295	2.55528	0.0106101	0.121897	20.6242	9.53614	39.9234	103.362	26.2885
624	ENSG00000124767	GLO1	73.7628	-1.39713	0.546678	-2.55568	0.0105982	0.121897	127.332	108.365	66.8484	21.2024	45.0661
625	ENSG00000165912	PACSIN3	95.2327	1.41646	0.554574	2.55414	0.010645	0.122103	65.4593	29.4753	75.2045	202.748	103.276
626	ENSG00000148498	PARD3	168.486	1.08648	0.425984	2.55052	0.0107562	0.122984	98.6373	102.297	207.973	295.509	138.015
627	ENSG00000204291	COL15A1	43.321	1.49094	0.584531	2.55066	0.010752	0.122984	22.4176	19.0723	53.8501	64.9324	56.3326
628	ENSG00000141646	SMAD4	96.5177	1.3034	0.51119	2.54974	0.0107803	0.123063	52.9055	49.4145	106.772	197.448	76.049
629	ENSG00000146674	IGFBP3	125.04	-1.15419	0.452928	-2.5483	0.010825	0.123378	225.072	149.111	91.9166	53.0061	106.093
630	ENSG00000161202	DVL3	113.251	1.22286	0.480079	2.54721	0.0108587	0.123565	71.7362	53.7491	103.986	221.3	115.482
631	ENSG00000057019	DCBLD2	885.579	-0.838227	0.329386	-2.54481	0.0109336	0.12422	1230.28	1178.15	902.454	549.938	567.081
632	ENSG00000090905	TNRC6A	396.862	0.863335	0.339545	2.54263	0.0110023	0.124576	243.903	287.818	441.014	606.919	404.656
633	ENSG00000131626	PPFIA1	415.351	1.08747	0.427867	2.54161	0.0110344	0.124576	245.697	249.673	410.375	863.999	307.013
634	ENSG00000173264	GPR137	75.5401	1.3807	0.543222	2.54169	0.0110319	0.124576	38.5582	38.1446	64.9915	159.018	76.9879
635	ENSG00000198355	PIM3	51.6897	-1.64645	0.647447	-2.54298	0.010991	0.124576	104.914	70.2207	51.0648	17.227	15.022
636	ENSG00000049239	H6PD	81.4641	1.57966	0.621847	2.54026	0.0110769	0.124683	34.9714	39.0115	80.7752	209.374	43.1883
637	ENSG00000139289	PHLDA1	380.339	-0.949973	0.373975	-2.54021	0.0110787	0.124683	599.894	471.605	339.813	174.92	315.462
638	ENSG00000101782	RIOK3	170.926	1.02863	0.405394	2.53737	0.011169	0.124998	118.365	91.8937	218.186	270.331	155.853
639	ENSG00000102974	CTCF	348.443	0.859311	0.338695	2.53713	0.0111767	0.124998	201.758	266.145	360.239	485.005	429.066
640	ENSG00000122257	RBBP6	419.138	0.831567	0.327667	2.53784	0.0111538	0.124998	248.387	322.495	433.586	564.514	526.71
641	ENSG00000169925	BRD3	141.528	1.00526	0.396198	2.53727	0.011172	0.124998	86.0834	90.1599	148.552	205.398	177.448
642	ENSG00000170340	B3GNT2	94.9212	1.25734	0.495681	2.53659	0.0111939	0.124998	52.9055	50.2815	83.5605	185.521	102.338
643	ENSG00000160326	SLC2A6	44.0514	1.74824	0.6904	2.53222	0.0113344	0.12637	23.3143	13.0038	49.2079	104.687	30.044
644	ENSG00000188211	NCR3LG1	28.1012	2.13078	0.841789	2.53125	0.0113658	0.126523	6.27692	12.1369	19.4975	78.1839	24.4108
645	ENSG00000176105	YES1	52.8758	-1.35307	0.535513	-2.52668	0.0115146	0.127982	79.8065	86.6922	37.138	34.4539	26.2885
646	ENSG00000105127	AKAP8	118.545	1.04018	0.412335	2.52265	0.0116475	0.129259	64.5626	80.6237	156.908	133.84	156.792
647	ENSG00000068308	OTUD5	186.338	1.0235	0.405961	2.52119	0.0116959	0.129595	131.815	97.9622	173.62	311.411	216.88
648	ENSG00000197256	KANK2	497.339	0.936196	0.371685	2.51879	0.011776	0.130281	300.395	341.567	545.929	877.25	421.555
649	ENSG00000174579	MSL2	103.007	1.08183	0.429851	2.51674	0.0118445	0.130837	57.389	65.8861	112.342	140.466	138.954
650	ENSG00000120742	SERP1	508.947	0.957294	0.380712	2.51449	0.0119206	0.131475	328.193	321.628	438.229	942.183	514.504
651	ENSG00000149273	RPS3	1871.29	-0.810957	0.322713	-2.51294	0.0119731	0.131851	2529.6	2514.94	1202.34	1159.51	1950.05
652	ENSG00000134759	ELP2	138.829	1.0058	0.400409	2.51193	0.0120073	0.132025	87.8769	84.9583	142.053	202.748	176.509
653	ENSG00000086289	EPDR1	63.9551	-1.43158	0.570998	-2.50715	0.012171	0.133416	98.6373	107.498	60.3493	18.5521	34.7384
654	ENSG00000130749	ZC3H4	177.599	1.19786	0.477754	2.50728	0.0121663	0.133416	82.4966	117.034	204.259	363.091	121.115
655	ENSG00000138061	CYP1B1	28.9488	2.03544	0.812044	2.50657	0.012191	0.13343	8.07032	12.1369	13.9268	47.7054	62.9047
656	ENSG00000159335	PTMS	2200.59	2.25316	0.899706	2.50433	0.0122684	0.134074	469.872	879.926	2104.8	6286.52	1261.85
657	ENSG00000213753	CENPBD2P	120.612	1.13662	0.454286	2.50199	0.0123497	0.134757	63.6659	76.2891	121.627	221.3	120.176
658	ENSG00000170456	DENND5B	36.5169	1.60973	0.643673	2.50086	0.0123894	0.134886	17.0373	15.6046	38.0665	64.9324	46.9438
659	ENSG00000198732	SMOC1	23.965	2.40081	0.960102	2.50057	0.0123992	0.134886	10.7604	2.60077	19.4975	72.8833	14.0831
660	ENSG00000260257	0	64.704	1.42492	0.57024	2.49881	0.0124613	0.135356	24.211	39.8784	68.7053	132.515	58.2103
661	ENSG00000282100	HSP90AB4P	25.0214	2.38597	0.956005	2.49578	0.0125682	0.136311	4.48351	9.53614	15.7837	82.1594	13.1443
662	ENSG00000163491	NEK10	39.0872	-1.52203	0.610152	-2.49451	0.012613	0.136487	50.2153	78.023	20.4259	25.1779	21.5942
663	ENSG00000198176	TFDP1	44.706	-1.56076	0.625744	-2.49425	0.0126225	0.136487	95.0505	52.8822	29.7104	31.8036	14.0831
664	ENSG00000110092	CCND1	1123.56	-0.75106	0.301226	-2.49335	0.0126545	0.136627	1518.12	1452.96	1064	736.784	845.928
665	ENSG00000103942	HOMER2	39.1214	1.97547	0.793066	2.49092	0.0127412	0.137268	12.5538	15.6046	22.2828	117.938	27.2274
666	ENSG00000137942	FNBP1L	43.3213	1.60403	0.64403	2.49062	0.0127522	0.137268	21.5209	17.3384	30.6389	79.5091	67.5991
667	ENSG00000051341	POLQ	43.4395	-1.64864	0.662296	-2.48928	0.0128003	0.137359	69.0461	78.023	39.9234	19.8773	10.3276
668	ENSG00000083896	YTHDC1	358.498	0.898989	0.361091	2.48965	0.012787	0.137359	208.035	263.544	344.455	583.067	393.389
669	ENSG00000137166	FOXP4	46.3387	1.50198	0.603593	2.4884	0.0128321	0.137359	18.8308	25.1407	51.9932	88.7851	46.9438
670	ENSG00000164985	PSIP1	462.553	1.07149	0.430622	2.48825	0.0128373	0.137359	236.729	319.894	686.125	797.741	272.274
671	ENSG00000120942	UBIAD1	71.7718	1.20761	0.485793	2.48585	0.0129242	0.138083	45.7318	34.6769	102.13	92.7606	83.56
672	ENSG00000139233	LLPH	151.642	1.22354	0.492349	2.4851	0.0129513	0.138167	110.294	58.0838	271.108	217.325	101.399
673	ENSG00000074842	MYDGF	166.32	-0.967304	0.389495	-2.48348	0.0130105	0.138444	247.49	223.666	123.484	91.4354	145.526
674	ENSG00000176788	BASP1	2044.15	0.736487	0.296572	2.48333	0.0130159	0.138444	1225.79	1694.83	2481.75	2676.81	2141.58
675	ENSG00000072778	ACADVL	117.028	-1.17217	0.472604	-2.48023	0.0131298	0.139036	208.035	143.909	70.5622	49.0306	113.604
676	ENSG00000104884	ERCC2	98.7411	1.54117	0.621289	2.48061	0.0131159	0.139036	47.5252	44.213	116.056	246.478	39.4328
677	ENSG00000166398	GARRE1	48.2058	1.41183	0.569184	2.48044	0.0131219	0.139036	18.8308	29.4753	69.6338	58.3067	64.7825
678	ENSG00000134243	SORT1	34.6891	1.88602	0.763013	2.4718	0.0134435	0.142148	9.86373	16.4715	38.9949	87.46	20.6553
679	ENSG00000090857	PDPR	178.253	1.01702	0.411776	2.46984	0.0135174	0.142719	122.848	97.9622	281.32	239.852	149.281
680	ENSG00000128923	MINDY2	187.462	0.924563	0.374671	2.46767	0.0135997	0.143377	128.228	115.301	254.395	254.429	184.959
681	ENSG00000121060	TRIM25	68.1389	-1.36201	0.552123	-2.46686	0.0136305	0.14349	128.228	87.5591	45.4941	21.2024	58.2103
682	ENSG00000006025	OSBPL7	26.3018	2.2666	0.919093	2.46612	0.0136584	0.143569	8.07032	7.8023	13.9268	84.8097	16.8998
683	ENSG00000117523	PRRC2C	1798.82	0.766317	0.310802	2.46561	0.013678	0.143569	1171.09	1361.07	2270.06	2576.09	1615.81
684	ENSG00000108100	CCNY	150.227	1.0825	0.439239	2.46448	0.0137212	0.143811	106.708	72.8214	142.053	269.006	160.548
685	ENSG00000158290	CUL4B	116.031	-1.08797	0.442463	-2.45889	0.0139369	0.145647	183.824	156.913	106.772	55.6564	76.9879
686	ENSG00000161011	SQSTM1	826.055	-0.814618	0.331233	-2.45935	0.013919	0.145647	1239.24	990.025	478.152	613.545	809.311
687	ENSG00000066027	PPP2R5A	134.108	1.15374	0.469641	2.45664	0.0140241	0.145751	74.4263	79.7568	129.055	269.006	118.298
688	ENSG00000135047	CTSL	227.831	-0.898845	0.365893	-2.45658	0.0140267	0.145751	377.512	254.008	190.332	157.693	159.609
689	ENSG00000164713	BRI3	353.81	-0.880127	0.358279	-2.45654	0.0140282	0.145751	529.055	446.465	270.179	188.171	335.179
690	ENSG00000288948	0	31.0944	-1.77588	0.722824	-2.45686	0.0140157	0.145751	52.0087	56.3499	9.2845	10.6012	27.2274
691	ENSG00000155903	RASA2	43.4837	-1.47021	0.599111	-2.45398	0.0141285	0.146581	81.5999	59.8176	33.4242	17.227	25.3497
692	ENSG00000006042	TMEM98	199.604	1.06794	0.435895	2.44999	0.0142859	0.147614	138.989	101.43	155.98	369.717	231.902
693	ENSG00000102054	RBBP7	129.576	-0.972897	0.397133	-2.4498	0.0142934	0.147614	193.688	173.384	98.4157	100.711	81.6822
694	ENSG00000167552	TUBA1A	453.036	0.843246	0.344343	2.44886	0.014331	0.147614	322.813	290.419	508.791	716.907	426.25
695	ENSG00000169609	C15orf40	39.0349	1.85924	0.758805	2.45022	0.0142769	0.147614	20.6242	9.53614	42.7087	100.711	21.5942
696	ENSG00000279170	TSTD3	56.7832	1.74907	0.714093	2.44936	0.0143111	0.147614	24.211	22.54	49.2079	161.668	26.2885
697	ENSG00000106080	FKBP14	228.854	0.999686	0.408483	2.44731	0.0143927	0.148036	121.055	164.715	303.603	373.693	181.203
698	ENSG00000148606	POLR3A	192.457	0.994339	0.406497	2.44612	0.0144404	0.148314	129.125	111.833	239.54	319.361	162.426
699	ENSG00000188428	BLOC1S5	37.9496	1.58684	0.649055	2.44485	0.0144912	0.148623	15.2439	19.0723	40.8518	74.2085	40.3717
700	ENSG00000008441	NFIX	961.387	0.879264	0.359896	2.4431	0.0145615	0.148918	581.063	697.005	964.66	1710.77	853.439
701	ENSG00000164190	NIPBL	595.363	0.803998	0.32906	2.44332	0.0145529	0.148918	398.136	423.925	631.346	926.281	597.125
702	ENSG00000085377	PREP	80.2433	1.32924	0.545065	2.43869	0.0147407	0.150536	43.9384	39.8784	69.6338	173.595	74.1712
703	ENSG00000143891	GALM	68.4216	1.18342	0.485526	2.43741	0.0147931	0.150856	41.2483	36.4107	90.0597	86.1348	88.2544
704	ENSG00000077097	TOP2B	296.924	1.14682	0.470789	2.43595	0.0148527	0.151034	147.059	195.924	234.898	669.201	237.536
705	ENSG00000100364	KIAA0930	166.039	1.0503	0.431125	2.43618	0.0148433	0.151034	97.7406	104.031	137.411	299.484	191.531
706	ENSG00000126453	BCL2L12	32.8353	-1.7224	0.707497	-2.4345	0.0149125	0.151427	70.8395	42.4792	25.0682	7.95091	17.8387
707	ENSG00000175592	FOSL1	96.6753	-1.27621	0.524343	-2.43392	0.0149363	0.151454	171.27	127.437	98.4157	54.3312	31.9218
708	ENSG00000189171	S100A13	1014.88	0.86165	0.35433	2.43178	0.015025	0.152139	588.237	773.294	1298.9	1614.03	799.923
709	ENSG00000138430	OLA1	328.133	1.06446	0.437925	2.43069	0.01507	0.152379	231.349	164.715	301.746	677.152	265.702
710	ENSG00000214182	PTMAP5	102.509	1.41591	0.582673	2.43003	0.0150976	0.152443	45.7318	56.3499	87.2743	258.404	64.7825
711	ENSG00000134987	WDR36	46.6101	-1.37874	0.567589	-2.42912	0.0151354	0.15261	85.1867	62.4184	23.2113	33.1288	29.1052
712	ENSG00000162813	BPNT1	27.8257	2.36064	0.972011	2.42861	0.0151567	0.152611	9.86373	6.06845	49.2079	70.233	3.75551
713	ENSG00000152439	ZNF773	41.7477	1.54902	0.638133	2.42743	0.0152062	0.152771	15.2439	23.4069	68.7053	67.5827	33.7995
714	ENSG00000214021	TTLL3	27.6007	1.86816	0.769674	2.42721	0.0152153	0.152771	11.6571	9.53614	27.8535	63.6073	25.3497
715	ENSG00000171604	CXXC5	257.37	0.957593	0.394744	2.42586	0.0152723	0.153129	156.026	172.517	198.688	402.846	356.773
716	ENSG00000162385	MAGOH	67.5301	-1.31537	0.542467	-2.42479	0.0153173	0.153152	112.985	97.9622	27.8535	33.1288	65.7213
717	ENSG00000183386	FHL3	73.0929	1.29886	0.535628	2.42493	0.0153115	0.153152	42.145	35.5438	57.5639	139.141	91.071
718	ENSG00000126814	TRMT5	312.52	1.05198	0.434358	2.42191	0.0154393	0.154157	208.035	171.651	223.757	626.797	332.362
719	ENSG00000101347	SAMHD1	74.0401	1.45545	0.601969	2.41782	0.0156138	0.155466	30.4879	41.6122	81.7036	172.27	44.1272
720	ENSG00000140416	TPM1	1520.08	0.693606	0.286823	2.41824	0.0155957	0.155466	964.852	1253.57	1736.2	1778.35	1867.43
721	ENSG00000231767	RPS27AP5	142.106	2.81719	1.16591	2.41631	0.0156787	0.155895	46.6285	14.7377	91.9166	478.38	78.8656
722	ENSG00000049656	CLPTM1L	90.8073	-1.19681	0.495597	-2.41489	0.0157401	0.156289	161.406	113.567	51.9932	39.7545	87.3155
723	ENSG00000169359	SLC33A1	60.2749	1.31898	0.546327	2.41427	0.0157667	0.156337	30.4879	32.943	50.1363	96.736	91.071
724	ENSG00000133884	DPF2	86.8682	1.66002	0.68813	2.41236	0.0158498	0.156943	52.0087	23.4069	38.9949	250.454	69.4769
725	ENSG00000103160	HSDL1	36.7723	1.66671	0.691763	2.40937	0.0159802	0.157582	16.1406	15.6046	40.8518	82.1594	29.1052
726	ENSG00000111229	ARPC3	99.0485	-1.06113	0.440393	-2.40951	0.0159741	0.157582	163.2	124.837	77.9898	72.8833	56.3326
727	ENSG00000148737	TCF7L2	192.453	1.0642	0.441595	2.4099	0.0159571	0.157582	98.6373	133.506	163.407	372.368	194.347
728	ENSG00000140941	MAP1LC3B	67.9189	-1.43122	0.595392	-2.40383	0.0162242	0.159768	120.158	98.8291	54.7786	13.2515	52.5771
729	ENSG00000132840	BHMT2	80.369	1.2847	0.535448	2.39931	0.0164261	0.161314	48.4219	38.1446	93.7735	60.957	160.548
730	ENSG00000183864	TOB2	251.049	1.05556	0.439919	2.39943	0.0164207	0.161314	134.505	169.917	323.101	462.478	165.242
731	ENSG00000185650	ZFP36L1	504.606	-0.742875	0.309725	-2.3985	0.0164625	0.161449	653.696	677.066	458.654	368.392	365.223
732	ENSG00000128585	MKLN1	184.254	0.94851	0.395608	2.3976	0.0165028	0.161624	114.778	121.369	193.118	306.11	185.898
733	ENSG00000151353	TMEM18	227.134	0.946563	0.395323	2.39441	0.0166473	0.162595	115.675	175.985	321.244	324.662	198.103
734	ENSG00000151465	CDC123	59.1438	-1.41921	0.592713	-2.39443	0.0166463	0.162595	111.191	78.8899	35.2811	15.9018	54.4548
735	ENSG00000241746	0	31.2871	2.13756	0.893449	2.39248	0.016735	0.163228	16.1406	4.33461	18.569	96.736	20.6553
736	ENSG00000153914	SREK1	528.349	0.816722	0.341508	2.39152	0.0167789	0.163435	269.907	455.134	597.922	723.533	595.248
737	ENSG00000132823	OSER1	89.68	1.11979	0.46912	2.38701	0.0169861	0.165228	56.4923	48.5476	99.3442	151.067	92.9488
738	ENSG00000123240	OPTN	604.614	0.946666	0.396835	2.38554	0.0170541	0.165665	379.305	397.05	695.409	1125.05	426.25
739	ENSG00000144959	NCEH1	127.087	-1.02345	0.429401	-2.38343	0.0171521	0.166391	174.857	190.723	115.128	92.7606	61.9658
740	ENSG00000172201	ID4	34.9635	1.88923	0.793302	2.38147	0.0172435	0.167052	14.3472	12.1369	23.2113	100.711	24.4108
741	ENSG00000048649	RSF1	432.632	0.784819	0.329696	2.38043	0.0172925	0.167301	255.56	347.636	504.149	597.643	458.172
742	ENSG00000180370	PAK2	305.474	-0.772757	0.324797	-2.3792	0.0173502	0.167486	425.934	387.514	232.113	229.251	252.558
743	ENSG00000182287	AP1S2	420.17	0.856268	0.359924	2.37903	0.0173584	0.167486	251.077	313.826	383.45	687.754	464.744
744	ENSG00000183199	HSP90AB3P	78.0174	1.25716	0.528668	2.37797	0.0174082	0.167741	47.5252	37.2776	81.7036	155.043	68.538
745	ENSG00000115241	PPM1G	856.49	0.976962	0.411225	2.37573	0.017514	0.168534	450.145	632.853	1118.78	1546.45	534.221
746	ENSG00000163161	ERCC3	86.1461	1.20742	0.508365	2.37511	0.0175437	0.168594	51.112	45.0799	77.9898	168.294	88.2544
747	ENSG00000150991	UBC	2114.92	0.786108	0.331619	2.37052	0.0177632	0.170474	1704.63	1243.17	2069.52	3417.57	2139.7
748	ENSG00000136158	SPRY2	100.836	-1.08189	0.456512	-2.36989	0.0177932	0.170534	113.881	181.187	55.707	68.9079	84.4989
749	ENSG00000172379	ARNT2	83.4395	1.31291	0.556054	2.36111	0.0182202	0.174394	36.7648	51.1484	73.3476	185.521	70.4157
750	ENSG00000102119	EMD	83.9672	-1.18368	0.50163	-2.35967	0.0182911	0.174839	141.679	111.833	60.3493	31.8036	74.1712
751	ENSG00000223547	ZNF844	25.5562	2.1362	0.905491	2.35916	0.0183162	0.174845	8.07032	8.66922	39.9234	63.6073	7.51101
752	ENSG00000146425	DYNLT1	46.26	-1.44021	0.610736	-2.35815	0.0183663	0.17509	88.7736	60.6845	29.7104	14.5767	37.5551
753	ENSG00000152102	FAM168B	174.736	1.00163	0.425019	2.35666	0.01844	0.17556	110.294	107.498	165.264	320.687	169.937
754	ENSG00000120533	ENY2	132.494	-0.986613	0.418952	-2.35495	0.018525	0.175901	218.795	157.78	92.845	117.938	75.1101
755	ENSG00000175550	DRAP1	152.623	-0.977299	0.414993	-2.35498	0.0185239	0.175901	239.42	194.19	149.481	86.1348	93.8876
756	ENSG00000070444	MNT	88.1683	1.26963	0.53932	2.35413	0.0185659	0.176057	45.7318	49.4145	87.2743	190.822	67.5991
757	ENSG00000151092	NGLY1	23.6734	-1.89302	0.804995	-2.35159	0.0186934	0.177031	46.6285	37.2776	4.64225	18.5521	11.2665
758	ENSG00000135930	EIF4E2	534.842	0.792559	0.337344	2.34941	0.0188034	0.177838	356.888	385.78	552.428	846.772	532.343
759	ENSG00000104447	TRPS1	176.92	0.997806	0.424881	2.34844	0.0188525	0.178041	130.022	91.0268	161.55	311.411	190.592
760	ENSG00000175305	CCNE2	60.4341	1.70304	0.725314	2.348	0.0188745	0.178041	26.9011	24.2738	81.7036	152.392	16.8998
761	ENSG00000087365	SF3B2	1094.32	0.898279	0.382751	2.3469	0.0189303	0.178333	703.912	736.884	985.086	2109.64	936.06
762	ENSG00000161547	SRSF2	349.38	1.06802	0.455656	2.34393	0.0190819	0.179525	249.283	171.651	269.251	755.336	301.379
763	ENSG00000034510	TMSB10	1922.34	1.03876	0.44347	2.34235	0.0191625	0.179811	1452.66	901.599	1797.48	4204.7	1255.28
764	ENSG00000104969	SGTA	103.406	1.05959	0.452324	2.34255	0.0191522	0.179811	57.389	67.6199	113.271	173.595	105.154
765	ENSG00000145555	MYO10	896.299	0.697096	0.298468	2.33558	0.019513	0.182861	603.481	702.207	1148.49	1125.05	902.26
766	ENSG00000168803	ADAL	56.6916	1.2302	0.527238	2.33328	0.0196332	0.183747	35.8681	26.8746	79.8467	74.2085	66.6602
767	ENSG00000115226	FNDC4	36.3416	1.79164	0.768413	2.33161	0.0197213	0.184091	17.9341	11.27	45.4941	90.1103	16.8998
768	ENSG00000136108	CKAP2	178.273	-1.01553	0.435515	-2.3318	0.0197113	0.184091	274.391	237.537	187.547	113.963	77.9267
769	ENSG00000134531	EMP1	368.62	-1.01961	0.437608	-2.32995	0.0198087	0.184219	572.096	487.21	392.734	269.006	122.054
770	ENSG00000136379	ABHD17C	123.089	0.955036	0.409906	2.32989	0.0198121	0.184219	73.5296	84.0914	175.477	131.19	151.159
771	ENSG00000139211	AMIGO2	103.866	1.31286	0.563255	2.33085	0.0197612	0.184219	49.3186	60.6845	68.7053	92.7606	247.863
772	ENSG00000178996	SNX18	88.0889	1.09206	0.469605	2.32548	0.0200465	0.185916	46.6285	58.0838	85.4174	140.466	109.849
773	ENSG00000231721	LINC-PINT	109.933	-1.00012	0.430029	-2.32571	0.0200342	0.185916	182.927	130.905	65.92	90.1103	79.8045
774	ENSG00000196544	BORCS6	75.5447	1.24499	0.53647	2.32071	0.0203025	0.188047	34.0747	48.5476	64.0631	148.417	82.6211
775	ENSG00000069849	ATP1B3	608.297	0.853329	0.367977	2.31897	0.0203965	0.188619	286.048	534.024	811.466	549.938	860.011
776	ENSG00000129566	TEP1	34.0628	2.02618	0.87388	2.3186	0.0204168	0.188619	14.3472	9.53614	60.3493	79.5091	6.57213
777	ENSG00000227437	RPS8P4	199.911	2.82231	1.21912	2.31504	0.0206109	0.190167	59.1824	26.8746	115.128	712.931	85.4377
778	ENSG00000118200	CAMSAP2	326.978	0.794243	0.343161	2.31449	0.0206409	0.190199	207.138	247.073	375.094	328.638	476.949
779	ENSG00000232533	FAM131B-AS2	38.2779	-1.69452	0.732645	-2.31289	0.0207289	0.190764	67.2527	64.1522	28.782	3.97545	27.2274
780	ENSG00000164032	H2AZ1	693.281	-0.745649	0.322478	-2.31225	0.0207639	0.190842	1046.45	782.83	596.994	608.244	431.883
781	ENSG00000100592	DAAM1	64.2598	1.17326	0.507626	2.31127	0.0208178	0.190848	37.6615	35.5438	65.92	96.736	85.4377
782	ENSG00000183354	KIAA2026	140.104	1.05947	0.458337	2.31155	0.0208023	0.190848	87.8769	81.4906	115.128	267.681	148.342
783	ENSG00000185697	MYBL1	114.347	-1.00802	0.43633	-2.31022	0.0208761	0.191138	156.923	169.917	75.2045	108.662	61.027
784	ENSG00000114423	CBLB	39.846	1.50063	0.649987	2.30871	0.0209598	0.191659	17.9341	19.9392	29.7104	71.5582	60.0881
785	ENSG00000105379	ETFB	94.7393	1.03261	0.447744	2.30626	0.0210961	0.192102	60.9758	55.483	142.981	116.613	97.6431
786	ENSG00000117362	APH1A	173.172	-0.872235	0.378149	-2.30659	0.0210777	0.192102	221.486	254.875	137.411	104.687	147.404
787	ENSG00000186577	SMIM29	64.1052	-1.29171	0.559975	-2.30673	0.0210699	0.192102	103.121	95.3614	19.4975	49.0306	53.516
788	ENSG00000197712	FAM114A1	826.493	0.712332	0.308915	2.30592	0.0211154	0.192102	484.219	710.876	1020.37	975.311	941.693
789	ENSG00000101400	SNTA1	61.947	1.28955	0.559589	2.30446	0.0211971	0.192357	33.178	32.943	65.92	123.239	54.4548
790	ENSG00000104722	NEFM	196.579	0.95386	0.413855	2.30482	0.0211767	0.192357	92.3604	159.514	245.111	178.895	307.013
791	ENSG00000170004	CHD3	602.613	0.913438	0.396521	2.30363	0.0212434	0.192534	360.474	426.526	506.934	1166.13	552.998
792	ENSG00000017797	RALBP1	243.434	0.852221	0.370155	2.30234	0.0213161	0.192705	153.336	175.118	384.378	251.779	252.558
793	ENSG00000161203	AP2M1	1197.57	0.733001	0.318318	2.30273	0.0212941	0.192705	904.773	808.838	1178.2	1853.89	1242.13
794	ENSG00000105755	ETHE1	162.03	-0.868404	0.377383	-2.30112	0.0213848	0.193083	219.692	225.4	140.196	104.687	120.176
795	ENSG00000112078	KCTD20	133.269	1.02864	0.447189	2.30023	0.0214354	0.193296	91.4637	72.8214	239.54	140.466	122.054
796	ENSG00000177352	CCDC71	117.882	1.04829	0.456833	2.29468	0.0217513	0.195898	70.8395	72.8214	94.7019	151.067	199.981
797	ENSG00000184787	UBE2G2	298.386	1.01965	0.444852	2.2921	0.0218997	0.196987	173.96	195.057	505.077	447.901	169.937
798	ENSG00000125351	UPF3B	164.67	0.910529	0.397605	2.29003	0.0220194	0.197321	89.6703	125.704	219.114	229.251	159.609
799	ENSG00000164611	PTTG1	207.211	-0.829384	0.362139	-2.29024	0.0220076	0.197321	301.292	260.077	133.697	184.196	156.792
800	ENSG00000184254	ALDH1A3	28.5873	-1.57319	0.686922	-2.2902	0.0220096	0.197321	46.6285	48.5476	20.4259	13.2515	14.0831
801	ENSG00000077380	DYNC1I2	637.64	0.740405	0.323462	2.28901	0.022079	0.197609	402.619	506.282	630.418	931.581	717.302
802	ENSG00000012983	MAP4K5	303.202	1.00916	0.441386	2.28635	0.022234	0.198543	168.58	208.061	211.687	612.22	315.462
803	ENSG00000112110	MRPL18	70.287	-1.1832	0.517545	-2.28617	0.0222442	0.198543	101.327	110.099	27.8535	53.0061	59.1492
804	ENSG00000188994	ZNF292	166.169	0.886777	0.387952	2.28579	0.0222665	0.198543	100.431	119.635	161.55	217.325	231.902
805	ENSG00000187239	FNBP1	83.2912	-1.03873	0.454563	-2.28511	0.0223065	0.198653	129.125	111.833	59.4208	50.3557	65.7213
806	ENSG00000115541	HSPE1	97.4178	-0.972552	0.425883	-2.28361	0.0223943	0.199187	139.886	136.107	65.92	72.8833	72.2935
807	ENSG00000227051	C14orf132	84.502	1.22992	0.538857	2.28246	0.022462	0.199541	52.0087	41.6122	174.549	91.4354	62.9047
808	ENSG00000180867	PDIA3P1	39.9779	1.77028	0.775944	2.28146	0.0225213	0.199821	11.6571	20.8061	19.4975	111.313	36.6162
809	ENSG00000198752	CDC42BPB	153.992	-0.991689	0.435023	-2.27962	0.0226299	0.200537	213.415	226.267	115.128	64.9324	150.22
810	ENSG00000103653	CSK	110.759	1.08406	0.475911	2.27787	0.0227344	0.200732	64.5626	67.6199	138.339	198.773	84.4989
811	ENSG00000164114	MAP9	156.137	0.894196	0.39247	2.27838	0.0227041	0.200732	95.9472	110.099	222.828	198.773	153.037
812	ENSG00000204070	SYS1	127.088	1.07678	0.472721	2.27784	0.0227361	0.200732	67.2527	84.9583	99.3442	241.178	142.709
813	ENSG00000075213	SEMA3A	807.109	-0.668089	0.293757	-2.27429	0.0229484	0.200928	992.65	1083.65	722.334	584.392	652.519
814	ENSG00000100105	PATZ1	60.7208	1.20189	0.528758	2.27305	0.0230234	0.200928	41.2483	26.8746	67.7769	95.4109	72.2935
815	ENSG00000100503	NIN	195.765	-0.828338	0.36403	-2.27547	0.0228778	0.200928	268.114	262.677	132.768	137.816	177.448
816	ENSG00000101138	CSTF1	55.2373	1.23218	0.541517	2.27543	0.0228802	0.200928	35.8681	25.1407	76.1329	80.8342	58.2103
817	ENSG00000101460	MAP1LC3A	73.5021	1.28029	0.563049	2.27385	0.022975	0.200928	25.1077	53.7491	67.7769	145.767	75.1101
818	ENSG00000108219	TSPAN14	156.824	1.05516	0.464397	2.27211	0.0230799	0.200928	89.6703	100.563	238.612	255.754	99.5209
819	ENSG00000111530	CAND1	167.106	0.908452	0.399453	2.27424	0.0229515	0.200928	110.294	108.365	154.123	263.705	199.042
820	ENSG00000134107	BHLHE40	35.0126	1.6749	0.736663	2.27363	0.0229882	0.200928	17.9341	12.1369	25.9966	86.1348	32.8607
821	ENSG00000136718	IMP4	244.671	0.802383	0.352831	2.27413	0.0229582	0.200928	157.82	180.32	315.673	327.312	242.23
822	ENSG00000142937	RPS8	1811.97	-0.669949	0.294889	-2.27187	0.0230946	0.200928	2480.28	2183.78	1500.38	1197.94	1697.49
823	ENSG00000198682	PAPSS2	484.097	-0.735476	0.323669	-2.27231	0.023068	0.200928	616.035	657.994	408.518	299.484	438.455
824	ENSG00000240682	ISY1	112.475	1.09665	0.482561	2.27257	0.0230522	0.200928	73.5296	59.8176	136.482	208.049	84.4989
825	ENSG00000013297	CLDN11	476.616	-0.935475	0.41216	-2.26969	0.0232265	0.201233	595.41	741.218	518.075	182.871	345.506
826	ENSG00000107798	LIPA	54.2121	-1.29613	0.571126	-2.26944	0.0232419	0.201233	95.0505	73.6884	50.1363	21.2024	30.9829
827	ENSG00000115758	ODC1	156.914	-0.885822	0.390129	-2.27059	0.023172	0.201233	248.387	184.654	100.273	117.938	133.32
828	ENSG00000248333	CDK11B	226.761	0.847608	0.373485	2.26946	0.0232404	0.201233	121.055	185.521	322.172	247.803	257.252
829	ENSG00000145730	PAM	305.042	0.873496	0.385006	2.26879	0.0232812	0.201331	203.551	202.86	259.966	527.41	331.423
830	ENSG00000185561	TLCD2	69.4194	1.14835	0.506464	2.26738	0.0233671	0.20183	37.6615	42.4792	63.1346	103.362	100.46
831	ENSG00000141837	CACNA1A	246.567	0.897625	0.396193	2.26563	0.0234741	0.20251	162.303	162.114	263.68	430.674	214.064
832	ENSG00000253284	0	23.9085	2.41158	1.06522	2.26392	0.023579	0.20317	6.27692	6.93537	21.3544	82.1594	2.81663
833	ENSG00000143545	RAB13	312.56	0.951988	0.421034	2.26107	0.0237549	0.20444	138.989	261.81	363.024	254.429	544.548
834	ENSG00000159593	NAE1	61.8928	-1.15389	0.510436	-2.26059	0.0237847	0.204452	94.1538	91.0268	41.7803	31.8036	50.6993
835	ENSG00000240498	CDKN2B-AS1	177.321	1.02975	0.455925	2.25859	0.0239086	0.205271	62.7692	155.179	169.906	280.932	217.819
836	ENSG00000132388	UBE2G1	111.276	0.980325	0.434335	2.25707	0.0240037	0.20584	73.5296	66.753	128.126	176.245	111.726
837	ENSG00000169019	COMMD8	32.0872	-1.64816	0.730941	-2.25484	0.0241434	0.206791	70.8395	38.1446	21.3544	6.62576	23.4719
838	ENSG00000197894	ADH5	147.425	-0.909049	0.403264	-2.25423	0.0241819	0.206873	241.213	168.183	104.915	129.865	92.9488
839	ENSG00000174231	PRPF8	99.2199	-1.01257	0.449603	-2.25215	0.0243129	0.207499	146.163	138.707	93.7735	58.3067	59.1492
840	ENSG00000253352	TUG1	101.271	-1.16232	0.51603	-2.25243	0.0242952	0.207499	173.064	130.905	75.2045	30.4785	96.7043
841	ENSG00000138639	ARHGAP24	49.867	-1.4436	0.641764	-2.24942	0.0244856	0.207982	82.4966	78.023	42.7087	35.7791	10.3276
842	ENSG00000166855	CLPX	68.5306	1.26544	0.56234	2.2503	0.0244296	0.207982	38.5582	35.5438	67.7769	144.441	56.3326
843	ENSG00000178741	COX5A	247.106	0.811874	0.360875	2.24974	0.0244655	0.207982	188.308	151.711	343.527	315.386	236.597
844	ENSG00000183963	SMTN	212.69	-0.825874	0.36693	-2.25077	0.0244001	0.207982	252.87	323.362	144.838	147.092	195.286
845	ENSG00000074621	SLC24A1	45.2055	1.32898	0.591205	2.24791	0.0245818	0.208446	17.9341	29.4753	51.9932	54.3312	72.2935
846	ENSG00000162236	STX5	142.209	0.925237	0.411646	2.24765	0.0245983	0.208446	106.708	78.023	203.331	186.846	136.137
847	ENSG00000132361	CLUH	171.822	0.98286	0.437467	2.24671	0.0246588	0.208466	121.055	95.3614	229.327	287.558	125.809
848	ENSG00000172809	RPL38	834.422	-0.671365	0.298822	-2.24671	0.0246589	0.208466	1141.5	1007.36	781.755	616.195	625.292
849	ENSG00000179051	RCC2	32.99	1.68433	0.75035	2.24472	0.024786	0.209294	12.5538	15.6046	33.4242	80.8342	22.533
850	ENSG00000164609	SLU7	196.182	0.903384	0.402801	2.24275	0.0249126	0.210116	104.914	152.578	265.537	288.883	168.998
851	ENSG00000010256	UQCRC1	248.674	0.789886	0.352372	2.24162	0.0249858	0.210457	180.237	165.582	313.816	340.564	243.169
852	ENSG00000177981	ASB8	66.8854	1.28897	0.575122	2.24122	0.0250117	0.210457	18.8308	52.8822	116.985	71.5582	74.1712
853	ENSG00000071054	MAP4K4	2733.75	0.775603	0.346323	2.23954	0.0251211	0.210635	1889.35	1941.04	2884.7	4706.94	2246.73
854	ENSG00000114978	MOB1A	49.0271	-1.2997	0.58025	-2.2399	0.0250975	0.210635	84.29	68.4868	32.4958	18.5521	41.3106
855	ENSG00000155363	MOV10	65.4719	1.30718	0.58348	2.24031	0.025071	0.210635	21.5209	47.6807	64.0631	131.19	62.9047
856	ENSG00000105723	GSK3A	112.126	1.01905	0.455191	2.23872	0.025174	0.210833	71.7362	66.753	135.554	190.822	95.7654
857	ENSG00000008853	RHOBTB2	31.6147	1.56143	0.698285	2.2361	0.0253453	0.211621	11.6571	17.3384	37.138	60.957	30.9829
858	ENSG00000106392	C1GALT1	31.8225	-1.52718	0.683019	-2.23592	0.0253567	0.211621	57.389	46.8138	12.9983	27.8282	14.0831
859	ENSG00000112320	SOBP	85.5863	1.12222	0.501814	2.23633	0.0253301	0.211621	39.4549	60.6845	69.6338	135.165	122.993
860	ENSG00000168078	PBK	71.3975	-1.23298	0.551761	-2.23462	0.0254423	0.212088	110.294	107.498	65.92	51.6809	21.5942
861	ENSG00000005022	SLC25A5	40.275	-1.5501	0.694436	-2.23216	0.0256042	0.212942	80.7032	52.8822	41.7803	11.9264	14.0831
862	ENSG00000111913	RIPOR2	24.2597	1.89141	0.847208	2.23252	0.0255807	0.212942	4.48351	13.8707	18.569	54.3312	30.044
863	ENSG00000213699	SLC35F6	44.0974	-1.27233	0.570717	-2.22935	0.0257903	0.214242	78.0131	58.0838	28.782	26.503	29.1052
864	ENSG00000149485	FADS1	265.735	0.793221	0.355951	2.22845	0.0258503	0.214243	188.308	181.187	375.094	245.153	338.934
865	ENSG00000179262	RAD23A	26.1906	-1.91416	0.858913	-2.22859	0.0258415	0.214243	43.0417	51.1484	21.3544	1.32515	14.0831
866	ENSG00000139354	GAS2L3	63.6977	-1.28211	0.575642	-2.22727	0.0259289	0.214647	109.398	87.5591	60.3493	42.4048	18.7775
867	ENSG00000081087	OSTM1	124.369	1.03067	0.463059	2.22578	0.0260289	0.21481	94.1538	58.9507	216.329	144.441	107.971
868	ENSG00000243667	DNAAF10	88.4854	1.15441	0.518689	2.22564	0.0260385	0.21481	44.8351	57.2168	174.549	95.4109	70.4157
869	ENSG00000280088	0	38.0582	1.77079	0.795572	2.2258	0.0260276	0.21481	17.0373	13.8707	32.4958	109.988	16.8998
870	ENSG00000121766	ZCCHC17	189.02	0.830892	0.373756	2.22308	0.0262101	0.215387	115.675	142.175	237.683	189.497	260.069
871	ENSG00000143387	CTSK	73.8663	-1.16658	0.52479	-2.22295	0.0262191	0.215387	132.712	89.2929	60.3493	27.8282	59.1492
872	ENSG00000163359	COL6A3	3753.01	0.671244	0.301941	2.2231	0.0262091	0.215387	2250.72	3286.5	4452.85	4993.17	3781.79
873	ENSG00000175782	SLC35E3	99.066	0.99987	0.449865	2.2226	0.0262428	0.215387	49.3186	74.5553	145.767	113.963	111.726
874	ENSG00000184661	CDCA2	129.244	-1.07121	0.482109	-2.22192	0.0262887	0.215387	193.688	183.787	145.767	67.5827	55.3937
875	ENSG00000253293	HOXA10	54.6302	1.18814	0.534659	2.22224	0.0262671	0.215387	34.9714	26.8746	62.2062	70.233	78.8656
876	ENSG00000080493	SLC4A4	44.8784	1.34845	0.607459	2.21981	0.0264316	0.216071	17.0373	29.4753	73.3476	62.2821	42.2494
877	ENSG00000169641	LUZP1	296.254	0.75547	0.340333	2.2198	0.0264325	0.216071	195.481	223.666	293.39	392.245	376.489
878	ENSG00000119333	DYNC2I2	64.5953	1.67831	0.756558	2.21835	0.0265309	0.216628	25.1077	30.3423	69.6338	182.871	15.022
879	ENSG00000118705	RPN2	570.864	0.715072	0.322444	2.21766	0.0265777	0.216764	360.474	463.803	774.328	703.655	552.059
880	ENSG00000134419	RPS15A	72.8902	-1.15464	0.520867	-2.21677	0.0266386	0.217014	142.576	75.4222	64.0631	41.0797	41.3106
881	ENSG00000060339	CCAR1	556.399	0.699336	0.315913	2.2137	0.0268494	0.217541	355.991	453.4	596.065	760.637	615.903
882	ENSG00000169714	CNBP	240.288	0.897183	0.405266	2.21381	0.0268415	0.217541	148.853	167.316	220.043	433.324	231.902
883	ENSG00000170525	PFKFB3	67.8798	1.31367	0.593046	2.21512	0.0267519	0.217541	37.6615	33.8099	64.0631	155.043	48.8216
884	ENSG00000172057	ORMDL3	53.8462	1.4902	0.673043	2.21412	0.0268205	0.217541	34.0747	17.3384	46.4225	133.84	37.5551
885	ENSG00000177189	RPS6KA3	139.887	0.904392	0.408558	2.21362	0.026855	0.217541	78.0131	105.764	208.901	153.718	153.037
886	ENSG00000182372	CLN8	38.2892	1.5982	0.723027	2.21043	0.0270755	0.218984	17.9341	16.4715	54.7786	83.4845	18.7775
887	ENSG00000220848	RPS18P9	32.1081	1.68461	0.762214	2.21016	0.0270943	0.218984	16.1406	11.27	25.0682	80.8342	27.2274
888	ENSG00000092140	G2E3	107.788	-0.975615	0.441922	-2.20766	0.0272677	0.219986	162.303	143.909	102.13	58.3067	72.2935
889	ENSG00000106346	USP42	113.788	1.00285	0.454294	2.20749	0.0272796	0.219986	52.9055	89.2929	165.264	104.687	156.792
890	ENSG00000147548	NSD3	385.003	0.886648	0.401931	2.20597	0.0273859	0.220595	255.56	254.008	303.603	722.207	389.634
891	ENSG00000203805	PLPP4	25.3063	1.78617	0.809859	2.20553	0.0274169	0.220597	14.3472	6.06845	21.3544	55.6564	29.1052
892	ENSG00000082701	GSK3B	301.138	0.951201	0.43159	2.20394	0.0275282	0.221015	227.762	157.78	285.963	591.017	243.169
893	ENSG00000112305	SMAP1	53.4837	1.42539	0.646755	2.20391	0.0275305	0.221015	26.9011	26.0077	36.2096	128.54	49.7604
894	ENSG00000134057	CCNB1	116.202	-0.999173	0.453808	-2.20175	0.0276828	0.221989	169.477	162.114	100.273	99.3863	49.7604
895	ENSG00000198380	GFPT1	246.194	0.907652	0.413194	2.19668	0.0280437	0.224631	148.853	173.384	195.903	445.251	267.58
896	ENSG00000143322	ABL2	585.853	0.718643	0.327307	2.19562	0.0281191	0.224984	425.037	419.59	870.886	669.201	544.548
897	ENSG00000086827	ZW10	36.2178	-1.4532	0.662203	-2.1945	0.0281998	0.225378	60.9758	56.3499	16.7121	13.2515	33.7995
898	ENSG00000135365	PHF21A	71.802	1.30923	0.596915	2.19332	0.028284	0.225549	36.7648	39.0115	48.2794	168.294	66.6602
899	ENSG00000166130	IKBIP	164.222	-0.812496	0.370427	-2.19341	0.0282782	0.225549	228.659	214.13	114.199	129.865	134.259
900	ENSG00000072274	TFRC	113.174	-0.952304	0.435417	-2.18711	0.0287348	0.226729	188.308	130.905	86.3459	63.6073	96.7043
901	ENSG00000100410	PHF5A	38.0271	-1.42543	0.651797	-2.18692	0.0287483	0.226729	81.5999	40.7453	26.9251	14.5767	26.2885
902	ENSG00000109805	NCAPG	118.664	-1.04562	0.4775	-2.18978	0.0285401	0.226729	173.96	169.917	128.126	71.5582	49.7604
903	ENSG00000109971	HSPA8	329.47	-0.798148	0.364502	-2.18969	0.0285466	0.226729	538.918	345.035	260.895	303.46	199.042
904	ENSG00000110395	CBL	63.976	-1.1168	0.510209	-2.1889	0.028604	0.226729	94.1538	95.3614	51.0648	30.4785	48.8216
905	ENSG00000124201	ZNFX1	419.709	0.744076	0.340177	2.18732	0.0287194	0.226729	305.776	292.153	556.142	367.067	577.409
906	ENSG00000136231	IGF2BP3	35.4298	-1.46583	0.669567	-2.18922	0.0285811	0.226729	52.9055	61.5514	23.2113	29.1533	10.3276
907	ENSG00000143458	GABPB2	76.8122	1.17569	0.536817	2.19011	0.0285163	0.226729	41.2483	45.9469	78.9183	155.043	62.9047
908	ENSG00000163704	PRRT3	25.6247	1.62248	0.741793	2.18723	0.0287255	0.226729	8.96703	13.8707	41.7803	27.8282	35.6773
909	ENSG00000197457	STMN3	52.3632	-1.33307	0.60929	-2.18791	0.0286765	0.226729	69.0461	95.3614	20.4259	22.5276	54.4548
910	ENSG00000172113	NME6	89.5908	1.00811	0.461108	2.18629	0.0287946	0.226844	42.145	69.3537	115.128	108.662	112.665
911	ENSG00000170561	IRX2	68.2429	1.18783	0.543626	2.18501	0.0288882	0.227083	34.9714	42.4792	127.198	53.0061	83.56
912	ENSG00000241553	ARPC4	951.243	0.744752	0.340789	2.18537	0.0288614	0.227083	807.929	545.294	946.091	1490.8	966.104
913	ENSG00000112473	SLC39A7	317.442	0.739367	0.338687	2.18304	0.0290329	0.227796	190.101	262.677	385.307	405.496	343.629
914	ENSG00000131437	KIF3A	102.769	1.02049	0.467489	2.18291	0.0290425	0.227796	59.1824	67.6199	123.484	176.245	87.3155
915	ENSG00000133858	ZFC3H1	237.156	0.79089	0.362394	2.1824	0.0290799	0.22784	150.646	179.453	297.104	225.276	333.301
916	ENSG00000173875	ZNF791	169.016	0.858504	0.393952	2.17921	0.0293161	0.22944	98.6373	128.304	159.693	242.503	215.942
917	ENSG00000102024	PLS3	205.308	1.10783	0.508886	2.17697	0.0294825	0.230491	135.402	106.631	123.484	470.429	190.592
918	ENSG00000178585	CTNNBIP1	57.0903	1.42469	0.655461	2.17357	0.0297374	0.232231	32.2813	24.2738	28.782	132.515	67.5991
919	ENSG00000165030	NFIL3	36.32	1.54434	0.710861	2.1725	0.029818	0.232537	21.5209	12.1369	24.1397	76.8588	46.9438
920	ENSG00000184260	H2AC20	32.2701	-1.68109	0.773917	-2.17219	0.0298415	0.232537	61.8725	48.5476	33.4242	5.30061	12.2054
921	ENSG00000033327	GAB2	54.347	1.54728	0.712687	2.17105	0.0299272	0.232669	23.3143	26.8746	28.782	152.392	40.3717
922	ENSG00000172667	ZMAT3	356.909	0.786516	0.362337	2.17067	0.0299559	0.232669	246.593	250.54	289.677	520.784	476.949
923	ENSG00000224093	BCAR3-AS1	32.5106	1.66676	0.767828	2.17074	0.0299508	0.232669	9.86373	18.2054	47.351	70.233	16.8998
924	ENSG00000160539	PLPP7	75.4739	1.21038	0.558	2.16914	0.0300723	0.233321	53.8022	30.3423	68.7053	155.043	69.4769
925	ENSG00000260483	0	23.7873	2.08667	0.962426	2.16813	0.0301485	0.233659	13.4505	2.60077	18.569	70.233	14.0831
926	ENSG00000164761	TNFRSF11B	408.137	-0.846224	0.390778	-2.16549	0.0303503	0.234969	536.228	576.503	454.941	279.607	193.409
927	ENSG00000007168	PAFAH1B1	336.05	0.87749	0.405364	2.1647	0.0304109	0.235011	245.697	201.126	324.029	626.797	282.602
928	ENSG00000128595	CALU	3695.08	0.797672	0.368514	2.16456	0.0304212	0.235011	2667.69	2453.39	5164.97	5789.59	2399.77
929	ENSG00000174501	ANKRD36C	60.6963	-1.35625	0.627017	-2.16301	0.0305401	0.235675	93.2571	98.8291	53.8501	10.6012	46.9438
930	ENSG00000011426	ANLN	200.281	-0.88695	0.410381	-2.16128	0.0306735	0.235881	277.081	275.681	195.903	161.668	91.071
931	ENSG00000105193	RPS16	1109.85	-0.677482	0.31351	-2.16096	0.0306984	0.235881	1513.63	1350.66	849.532	711.606	1123.83
932	ENSG00000109790	KLHL5	176.88	-0.788859	0.364884	-2.16195	0.0306224	0.235881	244.8	228.867	149.481	123.239	138.015
933	ENSG00000169851	PCDH7	78.4494	1.17593	0.544162	2.161	0.0306952	0.235881	26.0044	63.2853	68.7053	104.687	129.565
934	ENSG00000110108	TMEM109	81.823	-1.00656	0.466132	-2.15939	0.0308198	0.23656	121.952	112.7	63.1346	43.73	67.5991
935	ENSG00000067369	TP53BP1	254.752	0.9804	0.454268	2.1582	0.0309125	0.236765	167.683	153.445	214.472	535.361	202.797
936	ENSG00000128340	RAC2	46.8299	-1.24981	0.57908	-2.15826	0.0309077	0.236765	78.9098	65.0191	40.8518	21.2024	28.1663
937	ENSG00000121481	RNF2	28.3757	1.98341	0.919711	2.15656	0.0310401	0.237488	11.6571	8.66922	8.35605	88.7851	24.4108
938	ENSG00000125686	MED1	341.847	0.784384	0.364029	2.15473	0.0311829	0.238082	224.176	252.274	363.024	555.238	314.524
939	ENSG00000166173	LARP6	85.3979	-1.12636	0.522743	-2.15471	0.0311841	0.238082	168.58	84.9583	50.1363	39.7545	83.56
940	ENSG00000144867	SRPRB	219.31	0.811735	0.376891	2.15377	0.0312584	0.238396	151.543	149.977	271.108	328.638	195.286
941	ENSG00000115306	SPTBN1	806.932	0.708033	0.32884	2.15312	0.0313089	0.238497	578.373	590.374	821.679	1266.84	777.39
942	ENSG00000205955	HSP90AA5P	24.5975	1.97259	0.916311	2.15275	0.0313383	0.238497	12.5538	5.20153	25.9966	68.9079	10.3276
943	ENSG00000013588	GPRC5A	292.426	-0.867396	0.403109	-2.15176	0.0314159	0.238658	381.099	422.191	216.329	129.865	312.646
944	ENSG00000235162	C12orf75	492.288	-0.681153	0.316574	-2.15164	0.031426	0.238658	735.296	536.625	393.663	378.993	416.861
945	ENSG00000101350	KIF3B	304.09	0.785929	0.365596	2.14972	0.0315774	0.239467	164.097	260.077	426.159	295.509	374.612
946	ENSG00000109066	TMEM104	89.3274	1.21601	0.565733	2.14944	0.0315994	0.239467	42.145	57.2168	45.4941	165.644	136.137
947	ENSG00000109113	RAB34	554.502	0.749258	0.348903	2.14747	0.0317561	0.240401	408	378.845	463.297	867.974	654.397
948	ENSG00000233762	RPS15P4	2006.95	0.699464	0.325838	2.14666	0.0318204	0.240634	1232.97	1687.03	1831.83	3069.05	2213.87
949	ENSG00000138448	ITGAV	179.661	0.802966	0.37423	2.14565	0.0319011	0.24099	138.092	110.099	208.901	247.803	193.409
950	ENSG00000162599	NFIA	153.136	1.03714	0.483962	2.14302	0.0321119	0.242071	105.811	81.4906	142.981	318.036	117.36
951	ENSG00000182923	CEP63	33.6556	1.4165	0.660888	2.14333	0.0320863	0.242071	18.8308	14.7377	32.4958	54.3312	47.8827
952	ENSG00000116350	SRSF4	369.453	0.694546	0.324564	2.13993	0.0323601	0.243664	245.697	293.02	385.307	481.03	442.211
953	ENSG00000129534	MIS18BP1	72.9525	-1.06833	0.499325	-2.13955	0.0323911	0.243664	130.022	82.3576	51.9932	60.957	39.4328
954	ENSG00000154473	BUB3	287.119	-0.766458	0.358687	-2.13684	0.0326106	0.244546	429.521	333.765	284.106	194.797	193.409
955	ENSG00000165527	ARF6	340.488	0.794962	0.371921	2.13745	0.0325617	0.244546	248.387	223.666	300.818	567.165	362.406
956	ENSG00000197157	SND1	551.856	0.702636	0.328779	2.13711	0.0325893	0.244546	404.413	397.05	491.15	783.164	683.502
957	ENSG00000120526	NUDCD1	76.6068	1.19316	0.558601	2.13598	0.0326813	0.244768	36.7648	49.4145	94.7019	152.392	49.7604
958	ENSG00000143870	PDIA6	467.912	-0.846131	0.396195	-2.13564	0.0327086	0.244768	697.635	578.237	545	284.908	233.78
959	ENSG00000092964	DPYSL2	298.949	0.973347	0.456146	2.13385	0.0328552	0.245609	194.584	183.787	179.191	602.944	334.24
960	ENSG00000139687	RB1	39.312	-1.63796	0.768013	-2.13272	0.0329474	0.245935	70.8395	62.4184	33.4242	2.6503	27.2274
961	ENSG00000158417	EIF5B	1826.2	0.615105	0.288446	2.13248	0.0329675	0.245935	1275.11	1493.71	2250.56	2307.09	1804.52
962	ENSG00000124496	TRERF1	90.5733	1.37728	0.646219	2.13129	0.0330653	0.246153	35.8681	56.3499	122.555	208.049	30.044
963	ENSG00000166598	HSP90B1	3247.34	0.674705	0.316522	2.13162	0.0330382	0.246153	2100.97	2682.26	4633.9	4031.11	2788.46
964	ENSG00000132970	WASF3	93.3902	1.04629	0.491045	2.13073	0.0331113	0.24624	34.0747	79.7568	116.056	127.215	109.849
965	ENSG00000054523	KIF1B	208.81	0.888717	0.417294	2.12972	0.033195	0.246606	137.195	138.707	175.477	377.668	215.003
966	ENSG00000079332	SAR1A	430.661	0.865432	0.406601	2.12845	0.0332994	0.247126	332.677	243.605	396.448	816.293	364.284
967	ENSG00000141469	SLC14A1	206.09	0.89413	0.42083	2.12468	0.0336132	0.248939	169.477	102.297	252.538	335.263	170.875
968	ENSG00000198663	C6orf89	303.009	0.752221	0.353973	2.12508	0.0335798	0.248939	186.514	242.738	358.382	437.3	290.113
969	ENSG00000122557	HERPUD2	75.9734	1.19215	0.561857	2.12181	0.0338537	0.250184	48.4219	37.2776	128.126	121.914	44.1272
970	ENSG00000164252	AGGF1	28.4762	-1.50614	0.709753	-2.12206	0.0338323	0.250184	46.6285	46.8138	13.9268	10.6012	24.4108
971	ENSG00000188419	CHM	73.5088	1.14911	0.541667	2.12143	0.033886	0.250184	44.8351	39.8784	94.7019	136.491	51.6382
972	ENSG00000170545	SMAGP	145.875	-0.819582	0.387209	-2.11664	0.0342901	0.252907	213.415	181.187	122.555	96.736	115.482
973	ENSG00000010244	ZNF207	259.128	0.936796	0.442774	2.11574	0.0343669	0.253213	168.58	165.582	169.906	499.582	291.991
974	ENSG00000115211	EIF2B4	184.984	0.974626	0.460816	2.115	0.0344301	0.253394	122.848	110.966	190.332	368.392	132.382
975	ENSG00000167193	CRK	237.617	0.813783	0.384912	2.11421	0.0344975	0.253394	173.064	153.445	335.171	333.938	192.47
976	ENSG00000173575	CHD2	392.728	0.703317	0.332626	2.11444	0.034478	0.253394	234.936	335.499	430.801	447.901	514.504
977	ENSG00000196611	MMP1	187.279	0.816859	0.386459	2.1137	0.0345406	0.253451	153.336	104.031	246.968	184.196	247.863
978	ENSG00000138744	NAAA	56.3984	1.14328	0.541006	2.11324	0.0345804	0.253483	31.3846	33.8099	59.4208	95.4109	61.9658
979	ENSG00000072952	IRAG1	37.8495	1.40056	0.663326	2.11141	0.0347368	0.253852	23.3143	14.7377	29.7104	68.9079	52.5771
980	ENSG00000100911	PSME2	102.357	0.900331	0.42625	2.11221	0.0346682	0.253852	62.7692	71.9545	118.842	119.264	138.954
981	ENSG00000184990	SIVA1	173.563	-0.908351	0.430163	-2.11164	0.0347171	0.253852	244.8	237.537	77.0614	127.215	181.203
982	ENSG00000140988	RPS2	326.634	-0.809959	0.383861	-2.11003	0.0348556	0.25446	544.298	336.366	337.956	201.423	213.125
983	ENSG00000113387	SUB1	265.402	-0.771738	0.365835	-2.10952	0.0348995	0.254521	442.971	263.544	220.971	201.423	198.103
984	ENSG00000071127	WDR1	614.091	0.801601	0.380349	2.10754	0.0350707	0.254611	446.558	402.252	552.428	1123.73	545.487
985	ENSG00000163602	RYBP	115.408	-0.954152	0.452665	-2.10786	0.0350433	0.254611	180.237	145.643	113.271	54.3312	83.56
986	ENSG00000197226	TBC1D9B	101.857	1.02467	0.486221	2.10742	0.0350811	0.254611	67.2527	58.0838	93.7735	193.472	96.7043
987	ENSG00000197969	VPS13A	42.1404	-1.30086	0.617168	-2.10779	0.0350494	0.254611	63.6659	66.753	20.4259	41.0797	18.7775
988	ENSG00000232119	MCTS1	347.48	0.734974	0.348771	2.10733	0.0350894	0.254611	222.382	274.814	405.733	324.662	509.81
989	ENSG00000198363	ASPH	760.218	-0.664096	0.315233	-2.10668	0.0351451	0.254758	1020.45	932.808	572.854	508.858	766.123
990	ENSG00000079616	KIF22	47.1652	-1.24381	0.590901	-2.10494	0.0352962	0.255594	80.7032	64.1522	38.0665	17.227	35.6773
991	ENSG00000105889	STEAP1B	142.84	-0.855436	0.406589	-2.10393	0.0353844	0.255975	182.031	208.928	136.482	83.4845	103.276
992	ENSG00000117748	RPA2	28.3033	-1.58236	0.752824	-2.1019	0.0355618	0.256999	58.2857	36.4107	15.7837	6.62576	24.4108
993	ENSG00000104756	KCTD9	40.5465	-1.35347	0.645076	-2.09816	0.0358909	0.259116	76.2197	52.0153	29.7104	11.9264	32.8607
994	ENSG00000173546	CSPG4	221.83	0.8353	0.398379	2.09675	0.0360162	0.259758	151.543	149.977	324.958	312.736	169.937
995	ENSG00000084764	MAPRE3	41.6816	1.46138	0.69741	2.09545	0.0361314	0.260328	17.0373	23.4069	21.3544	87.46	59.1492
996	ENSG00000091164	TXNL1	206.78	0.862501	0.411744	2.09475	0.0361932	0.260459	141.679	135.24	171.763	361.766	223.453
997	ENSG00000100997	ABHD12	62.5877	-1.09383	0.522259	-2.09442	0.0362223	0.260459	92.3604	91.8937	48.2794	27.8282	52.5771
998	ENSG00000124222	STX16	76.2059	1.0211	0.488092	2.09201	0.0364373	0.261432	38.5582	55.483	93.7735	115.288	77.9267
999	ENSG00000137807	KIF23	86.6186	-1.03173	0.493119	-2.09224	0.0364168	0.261432	123.745	126.571	90.0597	41.0797	51.6382
1000	ENSG00000164403	SHROOM1	51.2155	1.28271	0.613361	2.09128	0.0365034	0.261432	17.9341	37.2776	82.6321	38.4294	79.8045
1001	ENSG00000187147	RNF220	127.707	1.09722	0.524627	2.09143	0.0364899	0.261432	92.3604	58.9507	87.2743	276.957	122.993
1002	ENSG00000141447	OSBPL1A	154.343	0.838378	0.401551	2.08785	0.0368112	0.261652	117.468	91.8937	184.762	229.251	148.342
1003	ENSG00000146677	RPL32P18	170.484	1.0131	0.484894	2.08933	0.0366779	0.261652	92.3604	118.768	141.124	363.091	137.076
1004	ENSG00000162980	ARL5A	47.5505	1.50843	0.72197	2.08933	0.0366782	0.261652	19.7275	25.1407	38.9949	128.54	25.3497
1005	ENSG00000163935	SFMBT1	70.3616	1.07664	0.515486	2.08859	0.0367447	0.261652	32.2813	52.0153	87.2743	112.638	67.5991
1006	ENSG00000165757	JCAD	80.6449	-1.06415	0.509338	-2.08928	0.0366827	0.261652	113.881	121.369	85.4174	38.4294	44.1272
1007	ENSG00000196199	MPHOSPH8	234.954	0.76297	0.365348	2.08833	0.0367677	0.261652	143.472	188.122	324.029	225.276	293.868
1008	ENSG00000213315	0	129.992	-1.00828	0.482355	-2.09033	0.0365879	0.261652	181.134	191.59	58.4924	67.5827	151.159
1009	ENSG00000290720	ZNF542P	96.2789	0.975126	0.467085	2.08769	0.0368261	0.261652	59.1824	62.4184	101.201	165.644	92.9488
1010	ENSG00000147130	ZMYM3	41.4488	1.38003	0.661747	2.08544	0.0370294	0.262575	14.3472	27.7415	30.6389	78.1839	56.3326
1011	ENSG00000171033	PKIA	109.902	-0.946527	0.453845	-2.08557	0.0370174	0.262575	152.439	156.913	114.199	64.9324	61.027
1012	ENSG00000072506	HSD17B10	146.402	0.889529	0.426855	2.08392	0.0371679	0.263297	104.914	88.426	134.625	249.128	154.915
1013	ENSG00000139505	MTMR6	42.435	-1.23609	0.593568	-2.08247	0.0372993	0.263967	71.7362	58.0838	23.2113	22.5276	36.6162
1014	ENSG00000204574	ABCF1	1115.09	0.616987	0.296595	2.08023	0.0375044	0.265157	714.672	974.42	1301.69	1362.26	1222.42
1015	ENSG00000162458	FBLIM1	144.607	0.791458	0.381416	2.07505	0.0379818	0.268267	103.121	97.9622	179.191	170.945	171.814
1016	ENSG00000159128	IFNGR2	24.2636	-1.50525	0.725825	-2.07385	0.0380931	0.268788	37.6615	41.6122	12.9983	15.9018	13.1443
1017	ENSG00000143977	SNRPG	40.4393	-1.32574	0.639845	-2.07198	0.0382676	0.269754	84.29	42.4792	35.2811	18.5521	21.5942
1018	ENSG00000120913	PDLIM2	308.284	-0.978746	0.472667	-2.07069	0.0383878	0.270336	398.136	477.674	124.412	143.116	398.084
1019	ENSG00000176619	LMNB2	57.6392	-1.1242	0.543528	-2.06834	0.0386082	0.271621	101.327	69.3537	49.2079	41.0797	27.2274
1020	ENSG00000124795	DEK	1724.55	0.79807	0.386228	2.06632	0.0387985	0.272692	1067.97	1321.19	2015.67	3074.35	1143.55
1021	ENSG00000075945	KIFAP3	66.422	1.12372	0.544146	2.06511	0.0389124	0.273225	36.7648	40.7453	61.2777	128.54	64.7825
1022	ENSG00000070047	PHRF1	63.8834	-1.55349	0.752809	-2.06359	0.0390563	0.2737	121.055	91.0268	41.7803	2.6503	62.9047
1023	ENSG00000100354	TNRC6B	419.556	0.740478	0.358827	2.06361	0.0390549	0.2737	249.283	348.503	423.373	662.576	414.044
1024	ENSG00000151612	ZNF827	191.137	0.830575	0.402609	2.06298	0.0391143	0.273838	114.778	145.643	156.908	255.754	282.602
1025	ENSG00000105976	MET	235.185	-0.919697	0.446094	-2.06167	0.0392393	0.274178	331.78	325.096	237.683	79.5091	201.858
1026	ENSG00000156587	UBE2L6	77.9995	0.957544	0.464421	2.0618	0.0392266	0.274178	49.3186	50.2815	100.273	104.687	85.4377
1027	ENSG00000138867	GUCD1	56.9887	-1.10533	0.536349	-2.06084	0.0393181	0.274461	103.121	65.0191	38.9949	31.8036	46.0049
1028	ENSG00000140199	SLC12A6	125.113	1.12408	0.545563	2.06041	0.0393595	0.274483	69.0461	77.156	168.05	253.104	58.2103
1029	ENSG00000068323	TFE3	241.098	0.862098	0.418539	2.05978	0.0394197	0.274626	147.059	175.985	171.763	412.122	298.563
1030	ENSG00000164172	MOCS2	44.5347	-1.1622	0.56434	-2.05939	0.0394566	0.274626	67.2527	65.8861	27.8535	34.4539	27.2274
1031	ENSG00000123384	LRP1	126.243	-0.84669	0.411469	-2.05773	0.0396164	0.27547	199.965	143.909	91.9166	109.988	85.4377
1032	ENSG00000131174	COX7B	74.9421	-1.04412	0.507597	-2.05698	0.0396881	0.275701	126.435	91.0268	66.8484	33.1288	57.2715
1033	ENSG00000157456	CCNB2	40.2226	-1.24588	0.60593	-2.05614	0.0397687	0.275994	76.2197	46.8138	25.0682	30.4785	22.533
1034	ENSG00000188227	ZNF793	27.3661	1.59195	0.774533	2.05537	0.0398431	0.276243	14.3472	10.4031	16.7121	43.73	51.6382
1035	ENSG00000086758	HUWE1	545.48	0.689438	0.335586	2.05443	0.0399344	0.276487	379.305	417.856	531.074	841.471	557.693
1036	ENSG00000196072	BLOC1S2	47.0314	-1.21742	0.592648	-2.05421	0.0399554	0.276487	86.9801	56.3499	30.6389	19.8773	41.3106
1037	ENSG00000163584	RPL22L1	136.973	-0.867206	0.422497	-2.05257	0.0401138	0.277315	222.382	153.445	77.9898	103.362	127.687
1038	ENSG00000213467	HMGB1P37	25.3023	1.53005	0.746493	2.04965	0.040399	0.279018	8.07032	15.6046	33.4242	38.4294	30.9829
1039	ENSG00000103966	EHD4	33.9022	-1.31432	0.64171	-2.04815	0.040545	0.279319	58.2857	47.6807	21.3544	15.9018	26.2885
1040	ENSG00000118482	PHF3	325.584	0.666653	0.325548	2.04778	0.0405811	0.279319	221.486	260.077	411.304	360.441	374.612
1041	ENSG00000164330	EBF1	56.097	1.26048	0.615311	2.04853	0.0405079	0.279319	28.6945	32.0761	54.7786	124.564	40.3717
1042	ENSG00000198839	ZNF277	30.6308	1.44716	0.706986	2.04694	0.0406639	0.279319	15.2439	14.7377	41.7803	56.9815	24.4108
1043	ENSG00000206562	METTL6	77.625	0.987342	0.48238	2.04681	0.0406764	0.279319	47.5252	50.2815	88.2028	78.1839	123.932
1044	ENSG00000291105	0	44.3156	-1.32822	0.648767	-2.0473	0.0406289	0.279319	93.2571	45.9469	31.5673	13.2515	37.5551
1045	ENSG00000126391	FRMD8	66.2437	-1.07059	0.523245	-2.04606	0.0407505	0.279357	110.294	83.2245	37.138	35.7791	64.7825
1046	ENSG00000161981	SNRNP25	30.0743	-1.44501	0.706272	-2.04596	0.0407598	0.279357	50.2153	46.8138	10.213	15.9018	27.2274
1047	ENSG00000063177	RPL18	2041.39	0.783709	0.383343	2.04441	0.0409134	0.279608	1508.25	1340.26	1860.61	3893.29	1604.54
1048	ENSG00000121152	NCAPH	59.4671	-1.22205	0.597735	-2.04447	0.0409073	0.279608	87.8769	93.6276	66.8484	19.8773	29.1052
1049	ENSG00000144591	GMPPA	106.368	1.14205	0.558438	2.04508	0.040847	0.279608	51.112	71.9545	140.196	216	52.5771
1050	ENSG00000050405	LIMA1	689.935	-0.675512	0.330731	-2.04248	0.041104	0.280427	808.826	969.219	526.431	714.257	430.944
1051	ENSG00000166452	AKIP1	180.651	0.968767	0.474327	2.0424	0.0411115	0.280427	135.402	93.6276	139.268	369.717	165.242
1052	ENSG00000107984	DKK1	102.49	-0.897428	0.439611	-2.04141	0.0412098	0.28083	169.477	114.434	86.3459	75.5336	66.6602
1053	ENSG00000049130	KITLG	97.876	-0.894611	0.438448	-2.0404	0.0413102	0.280855	138.989	131.772	84.489	76.8588	57.2715
1054	ENSG00000138069	RAB1A	219.278	0.87039	0.426767	2.03949	0.0414007	0.280855	170.373	122.236	159.693	373.693	270.396
1055	ENSG00000142409	ZNF787	109.8	0.907239	0.444854	2.03941	0.0414093	0.280855	51.112	92.7606	127.198	141.791	136.137
1056	ENSG00000166441	RPL27A	6388.68	0.591559	0.28997	2.04007	0.0413434	0.280855	4939.04	4858.23	5838.1	8531.32	7776.71
1057	ENSG00000178188	SH2B1	62.0865	1.1103	0.544276	2.03996	0.0413542	0.280855	31.3846	41.6122	55.707	111.313	70.4157
1058	ENSG00000152104	PTPN14	570.354	0.750513	0.368121	2.03877	0.041473	0.281021	421.45	387.514	760.401	869.299	413.106
1059	ENSG00000105894	PTN	311.442	0.683225	0.335351	2.03734	0.0416159	0.281599	263.631	193.324	365.809	355.141	379.306
1060	ENSG00000155096	AZIN1	70.2832	-1.03105	0.506128	-2.03713	0.041637	0.281599	99.534	103.164	34.3527	47.7054	66.6602
1061	ENSG00000164932	CTHRC1	125.856	1.13757	0.558725	2.03601	0.0417493	0.282093	86.9801	58.9507	112.342	296.834	74.1712
1062	ENSG00000087116	ADAMTS2	138.563	1.009	0.495798	2.0351	0.0418403	0.282442	87.8769	84.0914	88.2028	279.607	153.037
1063	ENSG00000136193	SCRN1	96.3273	-0.908255	0.446592	-2.03375	0.041977	0.283098	136.299	131.772	67.7769	55.6564	90.1321
1064	ENSG00000218891	ZNF579	52.8657	1.28657	0.633017	2.03244	0.0421096	0.283725	29.5912	26.8746	52.9217	119.264	35.6773
1065	ENSG00000116478	HDAC1	174.739	0.953478	0.469389	2.03132	0.042223	0.283955	117.468	105.764	141.124	359.116	150.22
1066	ENSG00000135926	TMBIM1	63.9868	-1.08105	0.532107	-2.03164	0.04219	0.283955	99.534	87.5591	26.9251	47.7054	58.2103
1067	ENSG00000101333	PLCB4	148.699	0.87957	0.433646	2.02832	0.0425281	0.285739	83.3933	114.434	132.768	160.343	252.558
1068	ENSG00000157077	ZFYVE9	28.2687	-1.39202	0.686431	-2.02791	0.0425694	0.285749	47.5252	42.4792	21.3544	15.9018	14.0831
1069	ENSG00000008083	JARID2	110.79	0.934096	0.461024	2.02613	0.0427511	0.286057	76.2197	66.753	91.9166	189.497	129.565
1070	ENSG00000101752	MIB1	85.0992	-0.975036	0.481552	-2.02478	0.0428902	0.286057	130.919	110.966	64.9915	39.7545	78.8656
1071	ENSG00000143319	ISG20L2	119.224	0.983335	0.4857	2.02457	0.0429113	0.286057	84.29	65.8861	184.762	184.196	76.9879
1072	ENSG00000160888	IER2	161.007	-0.82163	0.405874	-2.02435	0.0429345	0.286057	208.035	228	163.407	90.1103	115.482
1073	ENSG00000163605	PPP4R2	219.063	0.736337	0.363712	2.02451	0.0429181	0.286057	130.919	182.054	285.963	266.355	230.025
1074	ENSG00000170088	TMEM192	119.288	0.873122	0.430905	2.02625	0.0427391	0.286057	73.5296	85.8253	188.475	115.288	133.32
1075	ENSG00000183049	CAMK1D	126.265	0.939017	0.463528	2.0258	0.0427851	0.286057	89.6703	72.8214	122.555	234.552	111.726
1076	ENSG00000196821	ILRUN	208.16	0.86874	0.429066	2.02472	0.0428957	0.286057	143.472	134.373	209.83	386.944	166.181
1077	ENSG00000136527	TRA2B	306.227	0.679401	0.335795	2.02326	0.0430459	0.286267	231.349	218.464	368.595	409.472	303.257
1078	ENSG00000197728	RPS26	44.4048	-1.22479	0.605289	-2.02348	0.0430236	0.286267	86.9801	48.5476	38.0665	21.2024	27.2274
1079	ENSG00000169252	ADRB2	29.4022	1.38269	0.684065	2.02128	0.0432509	0.287364	12.5538	17.3384	35.2811	42.4048	39.4328
1080	ENSG00000138433	CIR1	143.217	0.855966	0.423659	2.02042	0.0433403	0.287524	78.0131	114.434	130.911	219.975	172.753
1081	ENSG00000148248	SURF4	517.913	0.804246	0.398088	2.02027	0.0433553	0.287524	407.103	307.757	467.011	967.36	440.333
1082	ENSG00000048544	MRPS10	374.209	0.683295	0.33866	2.01764	0.0436286	0.28907	258.25	290.419	486.508	496.932	338.934
1083	ENSG00000134318	ROCK2	543.096	0.740532	0.367146	2.017	0.0436959	0.289248	382.892	390.982	579.353	920.98	441.272
1084	ENSG00000135250	SRPK2	193.913	0.786687	0.390163	2.0163	0.0437684	0.289461	137.195	132.639	200.545	311.411	187.775
1085	ENSG00000115694	STK25	139.873	0.862462	0.427891	2.01561	0.0438405	0.289671	105.811	81.4906	133.697	231.901	146.465
1086	ENSG00000078061	ARAF	41.3878	1.23437	0.61303	2.01356	0.044056	0.290559	16.1406	29.4753	57.5639	59.6318	44.1272
1087	ENSG00000204519	ZNF551	26.1054	1.52636	0.758003	2.01366	0.0440447	0.290559	8.07032	16.4715	48.2794	30.4785	27.2274
1088	ENSG00000213609	RPL7AP50	35.1648	-1.27096	0.631512	-2.01256	0.0441604	0.29098	53.8022	54.6161	16.7121	22.5276	28.1663
1089	ENSG00000150687	PRSS23	270.1	-0.833642	0.414316	-2.01209	0.0442104	0.291042	408	325.963	161.55	140.466	314.524
1090	ENSG00000134108	ARL8B	148.422	-0.789808	0.392654	-2.01146	0.0442768	0.291113	204.448	192.457	92.845	137.816	114.543
1091	ENSG00000135111	TBX3	405.031	-0.651001	0.323687	-2.0112	0.0443041	0.291113	533.538	502.815	363.024	269.006	356.773
1092	ENSG00000197956	S100A6	1204.24	-0.703766	0.349987	-2.01083	0.044343	0.291113	1796.99	1338.53	1261.76	633.422	990.515
1093	ENSG00000111052	LIN7A	35.9833	1.35321	0.673553	2.00907	0.04453	0.291273	19.7275	17.3384	39.9234	72.8833	30.044
1094	ENSG00000123066	MED13L	298.956	0.706788	0.351616	2.01011	0.0444191	0.291273	199.068	234.069	276.678	425.374	359.59
1095	ENSG00000138778	CENPE	418.524	-0.812127	0.40408	-2.00982	0.0444507	0.291273	537.125	591.241	447.513	345.864	170.875
1096	ENSG00000174720	LARP7	204.897	0.770459	0.383462	2.00922	0.0445137	0.291273	125.538	162.114	271.108	283.582	182.142
1097	ENSG00000142168	SOD1	513.454	-0.6408	0.31909	-2.00821	0.0446208	0.291601	692.254	616.381	356.525	398.871	503.238
1098	ENSG00000041982	TNC	70.2193	1.02557	0.511013	2.00693	0.0447569	0.291689	42.145	44.213	73.3476	121.914	69.4769
1099	ENSG00000065548	ZC3H15	1160.5	0.59177	0.294956	2.0063	0.0448239	0.291689	815.999	963.15	1193.06	1547.78	1282.51
1100	ENSG00000119523	ALG2	38.2089	-1.4128	0.704308	-2.00595	0.0448621	0.291689	68.1494	54.6161	27.8535	6.62576	33.7995
1101	ENSG00000139350	NEDD1	41.0233	-1.22449	0.610292	-2.00641	0.0448127	0.291689	65.4593	59.8176	25.9966	17.227	36.6162
1102	ENSG00000148143	ZNF462	97.4725	1.03193	0.514474	2.00579	0.0448783	0.291689	47.5252	71.9545	113.271	184.196	70.4157
1103	ENSG00000232573	RPL3P4	535.361	0.639811	0.318941	2.00605	0.0448507	0.291689	391.859	410.054	495.792	682.453	696.646
1104	ENSG00000164574	GALNT10	124.377	0.804997	0.401439	2.00528	0.0449334	0.291783	79.8065	91.8937	137.411	155.043	157.731
1105	ENSG00000031698	SARS1	665.935	0.608295	0.303569	2.00381	0.0450901	0.292362	459.112	553.963	696.338	759.312	860.95
1106	ENSG00000071462	BUD23	131.553	0.789025	0.393788	2.00368	0.0451043	0.292362	86.0834	97.0952	168.05	149.742	156.792
1107	ENSG00000172260	NEGR1	57.7037	1.04005	0.519278	2.00288	0.0451901	0.292654	35.8681	34.6769	63.1346	83.4845	71.3546
1108	ENSG00000228519	RANBP1P1	37.7551	1.39905	0.698964	2.00161	0.0453265	0.293272	19.7275	18.2054	51.0648	78.1839	21.5942
1109	ENSG00000095002	MSH2	46.3579	-1.16094	0.58022	-2.00087	0.0454066	0.293438	64.5626	74.5553	38.9949	19.8773	33.7995
1110	ENSG00000254332	0	26.8797	2.04137	1.02037	2.00061	0.045434	0.293438	11.6571	6.93537	8.35605	98.0612	9.38876
1111	ENSG00000265972	TXNIP	119.877	-0.802579	0.401475	-1.99908	0.0456001	0.294246	152.439	169.917	90.9881	87.46	98.582
1112	ENSG00000166508	MCM7	171.765	-0.775498	0.388122	-1.99808	0.0457084	0.294679	248.387	209.795	168.05	108.662	123.932
1113	ENSG00000121297	TSHZ3	82.2385	1.15638	0.578945	1.99739	0.0457824	0.294891	45.7318	48.5476	58.4924	190.822	67.5991
1114	ENSG00000055483	USP36	317.522	0.743642	0.372463	1.99655	0.0458739	0.295178	209.828	241.871	394.591	485.005	256.313
1115	ENSG00000169857	AVEN	132.483	0.889431	0.445556	1.99623	0.0459093	0.295178	71.7362	103.164	126.269	227.926	133.32
1116	ENSG00000101417	PXMP4	39.4593	1.55381	0.778991	1.99464	0.0460818	0.29558	23.3143	13.0038	38.0665	106.012	16.8998
1117	ENSG00000174574	AKIRIN1	177.817	0.807869	0.405045	1.99452	0.0460955	0.29558	125.538	119.635	274.821	222.625	146.465
1118	ENSG00000175215	CTDSP2	72.8333	1.06751	0.535096	1.99498	0.0460451	0.29558	56.4923	31.2092	86.3459	127.215	62.9047
1119	ENSG00000100234	TIMP3	956.786	-0.574697	0.288334	-1.99317	0.0462432	0.296171	1289.46	1094.06	849.532	795.091	755.795
1120	ENSG00000234127	TRIM26	109.27	0.997003	0.500273	1.99292	0.0462703	0.296171	60.0791	76.2891	101.201	218.65	90.1321
1121	ENSG00000137563	GGH	28.3442	-1.40166	0.703481	-1.99246	0.0463206	0.296229	40.3516	50.2815	24.1397	11.9264	15.022
1122	ENSG00000119596	YLPM1	513.327	0.613443	0.308175	1.99057	0.0465284	0.297292	397.239	381.446	560.784	679.803	547.365
1123	ENSG00000111328	CDK2AP1	352.304	0.765626	0.384812	1.98961	0.0466342	0.297703	251.973	243.605	315.673	618.846	331.423
1124	ENSG00000157657	ZNF618	180.294	0.805519	0.405002	1.98893	0.0467093	0.297917	99.534	149.111	158.765	258.404	235.658
1125	ENSG00000120868	APAF1	27.6793	-1.41883	0.7135	-1.98855	0.046751	0.297918	43.0417	45.9469	21.3544	9.27606	18.7775
1126	ENSG00000100014	SPECC1L	31.2861	-1.65739	0.835307	-1.98416	0.0472377	0.299348	50.2153	56.3499	25.0682	1.32515	23.4719
1127	ENSG00000143228	NUF2	70.6093	-1.10508	0.557026	-1.98389	0.0472676	0.299348	121.055	86.6922	63.1346	59.6318	22.533
1128	ENSG00000174891	RSRC1	438.741	0.734047	0.369606	1.98602	0.0470306	0.299348	298.602	328.563	516.218	707.631	342.69
1129	ENSG00000175414	ARL10	58.2149	1.10061	0.554581	1.98457	0.0471919	0.299348	36.7648	32.0761	47.351	100.711	74.1712
1130	ENSG00000183530	PRR14L	58.3766	-1.03426	0.521233	-1.98427	0.0472262	0.299348	79.8065	88.426	43.6372	49.0306	30.9829
1131	ENSG00000187240	DYNC2H1	168.965	0.842964	0.424818	1.9843	0.0472229	0.299348	119.261	109.232	137.411	290.208	188.714
1132	ENSG00000198668	CALM1	2212.4	0.586655	0.295681	1.98408	0.0472469	0.299348	1527.98	1872.55	2603.37	2948.46	2109.66
1133	ENSG00000158163	DZIP1L	51.2315	1.15541	0.582867	1.98229	0.047447	0.300218	30.4879	28.6084	47.351	53.0061	96.7043
1134	ENSG00000164023	SGMS2	38.6823	-1.2839	0.647985	-1.98137	0.0475494	0.300601	75.323	44.213	30.6389	29.1533	14.0831
1135	ENSG00000078237	TIGAR	29.0008	1.46746	0.742124	1.97738	0.0479984	0.302373	8.96703	19.0723	24.1397	54.3312	38.4939
1136	ENSG00000125753	VASP	194.798	0.904768	0.457511	1.97759	0.0479752	0.302373	145.266	110.099	238.612	355.141	124.871
1137	ENSG00000136238	RAC1	1544.28	0.734061	0.371192	1.97758	0.0479764	0.302373	1138.81	1069.78	1596.93	2762.94	1152.94
1138	ENSG00000185950	IRS2	39.1633	1.22922	0.621529	1.97773	0.0479592	0.302373	22.4176	20.8061	38.0665	67.5827	46.9438
1139	ENSG00000125037	EMC3	230.125	0.703946	0.356201	1.97626	0.0481249	0.302904	158.716	175.118	236.755	324.662	255.374
1140	ENSG00000144381	HSPD1	687.869	-0.632424	0.320139	-1.97547	0.0482152	0.303206	914.637	833.112	659.2	604.269	428.128
1141	ENSG00000170653	ATF7	43.4959	1.60996	0.815192	1.97494	0.0482746	0.303314	17.9341	20.8061	14.8552	133.84	30.044
1142	ENSG00000115963	RND3	1808.63	-0.601442	0.304646	-1.97423	0.0483551	0.303553	2535.87	2012.13	1837.4	1274.8	1382.96
1143	ENSG00000115993	TRAK2	74.14	-0.947282	0.479918	-1.97384	0.0483997	0.303567	119.261	89.2929	63.1346	53.0061	46.0049
1144	ENSG00000087586	AURKA	241.289	-0.79677	0.404067	-1.97187	0.0486241	0.304504	257.354	390.115	250.682	181.546	126.748
1145	ENSG00000170779	CDCA4	27.7882	-2.0134	1.02111	-1.97179	0.0486339	0.304504	61.8725	39.8784	32.4958	0	4.69438
1146	ENSG00000156599	ZDHHC5	34.7509	-1.30994	0.664874	-1.97021	0.0488142	0.305366	60.9758	47.6807	30.6389	11.9264	22.533
1147	ENSG00000125676	THOC2	626.483	0.702993	0.357217	1.96797	0.0490713	0.306172	394.549	514.952	677.769	1013.74	531.404
1148	ENSG00000164919	COX6C	98.9361	-1.03731	0.527015	-1.96828	0.0490359	0.306172	168.58	117.901	113.271	35.7791	59.1492
1149	ENSG00000180900	SCRIB	82.0712	1.0258	0.521242	1.968	0.0490681	0.306172	64.5626	36.4107	80.7752	149.742	78.8656
1150	ENSG00000123342	MMP19	26.2422	1.51531	0.77077	1.96597	0.0493015	0.307074	13.4505	11.27	17.6406	50.3557	38.4939
1151	ENSG00000213465	ARL2	141.12	0.967454	0.492067	1.9661	0.0492866	0.307074	95.9472	83.2245	211.687	235.877	78.8656
1152	ENSG00000112029	FBXO5	57.5048	-1.34761	0.685843	-1.9649	0.0494256	0.30758	84.29	97.0952	74.276	15.9018	15.9609
1153	ENSG00000087263	OGFOD1	294.585	0.938112	0.477626	1.96412	0.0495167	0.307879	208.035	171.651	311.031	618.846	163.364
1154	ENSG00000170558	CDH2	431.446	0.717005	0.365185	1.9634	0.0495997	0.308128	287.842	334.632	350.954	495.607	688.196
1155	ENSG00000140650	PMM2	112.696	-0.892744	0.455161	-1.96138	0.0498345	0.308785	164.993	147.377	98.4157	50.3557	102.338
1156	ENSG00000182247	UBE2E2	70.9213	1.0141	0.516946	1.96172	0.0497953	0.308785	33.178	54.6161	65.92	112.638	88.2544
1157	ENSG00000266412	NCOA4	119.762	-0.914007	0.46596	-1.96156	0.0498142	0.308785	192.791	141.308	91.9166	51.6809	121.115
1158	ENSG00000089597	GANAB	273.175	-0.657902	0.336021	-1.95792	0.0502397	0.310836	368.545	332.031	239.54	194.797	230.964
1159	ENSG00000164463	CREBRF	100.447	0.981026	0.501083	1.95781	0.0502524	0.310836	47.5252	78.8899	94.7019	188.171	92.9488
1160	ENSG00000117751	PPP1R8	125.579	0.869282	0.444448	1.95587	0.0504807	0.31148	83.3933	84.0914	125.341	218.65	116.421
1161	ENSG00000119950	MXI1	26.6127	1.8014	0.921125	1.95566	0.0505057	0.31148	11.6571	9.53614	14.8552	84.8097	12.2054
1162	ENSG00000123352	SPATS2	86.1368	0.942739	0.482109	1.95545	0.0505302	0.31148	50.2153	60.6845	75.2045	104.687	139.893
1163	ENSG00000144231	POLR2D	93.1049	0.868537	0.444153	1.95549	0.050525	0.31148	64.5626	59.8176	115.128	131.19	94.8265
1164	ENSG00000182307	C8orf33	90.9254	-0.93264	0.477819	-1.95187	0.0509536	0.31382	138.092	117.034	90.9881	43.73	64.7825
1165	ENSG00000078369	GNB1	1236.1	0.741851	0.380241	1.951	0.0510571	0.314188	891.322	869.523	947.948	2285.89	1185.8
1166	ENSG00000062598	ELMO2	59.3521	1.02099	0.523512	1.95028	0.051143	0.314446	38.5582	34.6769	60.3493	92.7606	70.4157
1167	ENSG00000108671	PSMD11	260.014	0.920963	0.472503	1.94912	0.0512816	0.315028	210.725	127.437	313.816	496.932	151.159
1168	ENSG00000008324	SS18L2	26.3634	-1.51739	0.779378	-1.94692	0.0515439	0.31562	57.389	29.4753	14.8552	6.62576	23.4719
1169	ENSG00000070950	RAD18	42.7066	-1.17188	0.602247	-1.94585	0.0516727	0.31562	81.5999	46.8138	27.8535	22.5276	34.7384
1170	ENSG00000100614	PPM1A	148.967	1.03219	0.530361	1.94621	0.05163	0.31562	95.0505	87.5591	95.6304	344.539	122.054
1171	ENSG00000122218	COPA	439.363	0.600861	0.308879	1.94529	0.0517395	0.31562	329.987	340.7	528.288	534.036	463.805
1172	ENSG00000129347	KRI1	101.155	1.00703	0.517355	1.94649	0.0515956	0.31562	54.6989	71.0876	156.908	162.994	60.0881
1173	ENSG00000131748	STARD3	46.7634	-1.24924	0.64205	-1.9457	0.0516903	0.31562	77.1164	66.753	25.9966	13.2515	50.6993
1174	ENSG00000136754	ABI1	24.7116	-1.52024	0.780853	-1.94689	0.0515474	0.31562	52.0087	29.4753	20.4259	6.62576	15.022
1175	ENSG00000148154	UGCG	176.488	-0.735322	0.377621	-1.94725	0.051505	0.31562	206.242	258.343	144.838	115.288	157.731
1176	ENSG00000213853	EMP2	252.775	0.91894	0.472462	1.94501	0.0517743	0.31562	167.683	161.247	259.966	524.76	150.22
1177	ENSG00000125977	EIF2S2	842.703	0.57072	0.293561	1.94412	0.0518805	0.315973	638.452	666.663	1001.8	1058.8	847.805
1178	ENSG00000197858	GPAA1	241.79	0.876233	0.450785	1.94379	0.0519203	0.315973	183.824	137.841	285.963	449.226	152.098
1179	ENSG00000058272	PPP1R12A	794.252	0.588922	0.303247	1.94206	0.0521303	0.316638	533.538	685.735	865.316	1032.29	854.377
1180	ENSG00000101557	USP14	269.585	0.684292	0.352402	1.94179	0.052162	0.316638	200.861	194.19	349.097	357.791	245.986
1181	ENSG00000119185	ITGB1BP1	90.6567	-0.886466	0.456384	-1.94237	0.0520925	0.316638	134.505	116.168	69.6338	50.3557	82.6211
1182	ENSG00000164105	SAP30	144.709	1.06441	0.548597	1.94024	0.05235	0.31751	82.4966	91.8937	108.629	348.515	92.0099
1183	ENSG00000071626	DAZAP1	309.579	0.710729	0.366684	1.93826	0.0525912	0.318434	242.11	205.46	337.027	486.331	276.969
1184	ENSG00000141867	BRD4	748.755	0.584594	0.301604	1.93828	0.0525887	0.318434	537.125	614.648	835.605	991.213	765.184
1185	ENSG00000164587	RPS14	4076.76	0.680155	0.351008	1.93772	0.0526572	0.318565	3122.32	2866.04	3520.68	7117.39	3757.38
1186	ENSG00000094916	CBX5	602.669	0.61248	0.316295	1.93642	0.0528162	0.319258	442.074	472.472	673.127	845.447	580.226
1187	ENSG00000127838	PNKD	117.276	0.897177	0.463482	1.93573	0.0529005	0.319498	78.9098	75.4222	84.489	184.196	163.364
1188	ENSG00000036054	TBC1D23	51.0647	-1.06193	0.549009	-1.93427	0.0530805	0.320315	72.6329	76.2891	40.8518	25.1779	40.3717
1189	ENSG00000112769	LAMA4	296.143	-0.773893	0.40045	-1.93256	0.0532905	0.320415	462.699	326.83	330.528	155.043	205.614
1190	ENSG00000113456	RAD1	152.328	0.858584	0.444294	1.93247	0.0533014	0.320415	72.6329	131.772	182.905	243.828	130.504
1191	ENSG00000128311	TST	58.187	1.07438	0.555831	1.93292	0.053246	0.320415	39.4549	30.3423	76.1329	98.0612	46.9438
1192	ENSG00000173915	ATP5MK	73.2681	-1.00062	0.517864	-1.9322	0.0533345	0.320415	143.472	65.8861	55.707	54.3312	46.9438
1193	ENSG00000181192	DHTKD1	69.4101	0.984861	0.509775	1.93195	0.0533653	0.320415	41.2483	45.9469	70.5622	117.938	71.3546
1194	ENSG00000187514	PTMA	5437.17	0.693948	0.359027	1.93286	0.0532534	0.320415	3115.14	4819.22	8811.92	4155.67	6283.9
1195	ENSG00000057608	GDI2	331.103	0.684058	0.354327	1.93058	0.0535348	0.320448	256.457	228.867	451.227	437.3	281.663
1196	ENSG00000141232	TOB1	47.2515	1.26391	0.654595	1.93083	0.0535044	0.320448	23.3143	27.7415	39.9234	108.662	36.6162
1197	ENSG00000143612	C1orf43	71.4703	-0.969319	0.502	-1.93091	0.0534936	0.320448	104.017	98.8291	60.3493	33.1288	61.027
1198	ENSG00000241258	CRCP	56.3173	-1.06311	0.550703	-1.93046	0.0535496	0.320448	95.0505	68.4868	25.9966	51.6809	40.3717
1199	ENSG00000116774	OLFML3	78.4245	0.948608	0.491684	1.92931	0.053693	0.321038	48.4219	52.0153	68.7053	127.215	95.7654
1200	ENSG00000143398	PIP5K1A	33.7802	-1.23414	0.640259	-1.92757	0.0539088	0.32206	53.8022	49.4145	17.6406	19.8773	28.1663
1201	ENSG00000102384	CENPI	70.9322	-0.988535	0.513122	-1.92651	0.0540405	0.322578	69.9428	131.772	51.0648	59.6318	42.2494
1202	ENSG00000124357	NAGK	42.6039	-1.37322	0.713119	-1.92565	0.0541479	0.322951	86.0834	49.4145	40.8518	6.62576	30.044
1203	ENSG00000277586	NEFL	81.631	0.925196	0.481019	1.92341	0.0544289	0.324356	53.8022	52.0153	93.7735	132.515	76.049
1204	ENSG00000065978	YBX1	1708.64	-0.569387	0.296516	-1.92026	0.0548256	0.325159	1885.77	2363.23	1368.54	1246.97	1678.71
1205	ENSG00000088930	XRN2	661.086	0.65358	0.340143	1.92149	0.0546702	0.325159	380.202	603.378	609.992	870.624	841.233
1206	ENSG00000115756	HPCAL1	175.392	-0.779187	0.405606	-1.92105	0.054726	0.325159	246.593	221.932	187.547	100.711	120.176
1207	ENSG00000127337	YEATS4	59.5104	-1.04639	0.545048	-1.91982	0.054881	0.325159	89.6703	83.2245	52.9217	23.8527	47.8827
1208	ENSG00000136830	NIBAN2	619.427	-0.747818	0.389478	-1.92005	0.0548512	0.325159	849.177	787.165	320.315	385.619	754.857
1209	ENSG00000143569	UBAP2L	291.158	0.7213	0.375486	1.92098	0.0547346	0.325159	182.031	236.67	327.743	455.852	253.497
1210	ENSG00000147133	TAF1	105.051	0.83135	0.432823	1.92076	0.0547616	0.325159	75.323	67.6199	112.342	156.368	113.604
1211	ENSG00000165655	ZNF503	65.3482	1.1265	0.587137	1.91863	0.0550314	0.32578	28.6945	47.6807	40.8518	87.46	122.054
1212	ENSG00000070814	TCOF1	191.376	0.89557	0.466867	1.91826	0.0550785	0.32579	106.708	145.643	335.171	255.754	113.604
1213	ENSG00000090238	YPEL3	80.707	0.925296	0.48255	1.91751	0.0551729	0.32608	52.9055	52.0153	77.0614	90.1103	131.443
1214	ENSG00000116521	SCAMP3	165.117	0.764616	0.398832	1.91714	0.0552202	0.32609	103.121	129.171	173.62	254.429	165.242
1215	ENSG00000164951	PDP1	55.0702	-1.0734	0.560125	-1.91636	0.0553188	0.326135	70.8395	90.1599	55.707	30.4785	28.1663
1216	ENSG00000166033	HTRA1	386.349	0.717753	0.37451	1.91651	0.0552998	0.326135	251.077	306.023	298.033	475.729	600.881
1217	ENSG00000033170	FUT8	59.0804	-1.04449	0.546077	-1.91272	0.0557838	0.328226	85.1867	85.8253	56.6355	42.4048	25.3497
1218	ENSG00000104218	CSPP1	131.138	0.818072	0.427825	1.91217	0.0558549	0.328226	72.6329	107.498	175.477	117.938	182.142
1219	ENSG00000163961	RNF168	133.772	0.767131	0.401187	1.91215	0.0558566	0.328226	80.7032	107.498	172.692	164.319	143.648
1220	ENSG00000169499	PLEKHA2	84.3125	1.02036	0.533481	1.91264	0.0557947	0.328226	49.3186	54.6161	93.7735	165.644	58.2103
1221	ENSG00000197102	DYNC1H1	2200.84	0.599607	0.313795	1.91082	0.0560277	0.328695	1484.04	1878.62	3038.82	1901.59	2701.15
1222	ENSG00000204389	HSPA1A	79.567	-0.958693	0.501719	-1.91082	0.0560281	0.328695	121.952	103.164	61.2777	34.4539	76.9879
1223	ENSG00000105821	DNAJC2	213.3	0.760679	0.398454	1.90908	0.056252	0.329739	107.604	193.324	273.893	288.883	202.797
1224	ENSG00000165209	STRBP	60.5725	1.10732	0.580926	1.90613	0.0566328	0.3317	34.0747	37.2776	81.7036	111.313	38.4939
1225	ENSG00000006451	RALA	519.542	0.618402	0.324927	1.9032	0.0570141	0.331943	373.925	412.655	736.261	585.717	489.155
1226	ENSG00000132475	H3-3B	1352.33	0.700313	0.367976	1.90315	0.057021	0.331943	972.026	994.359	1181.92	2436.95	1176.41
1227	ENSG00000137310	TCF19	66.6875	-0.941035	0.4942	-1.90416	0.0568897	0.331943	108.501	78.8899	51.0648	42.4048	52.5771
1228	ENSG00000142867	BCL10	29.5387	-1.30256	0.684339	-1.90338	0.056991	0.331943	51.112	40.7453	24.1397	18.5521	13.1443
1229	ENSG00000148153	INIP	161.859	0.998899	0.524625	1.90403	0.0569069	0.331943	103.121	98.8291	154.123	363.091	90.1321
1230	ENSG00000165416	SUGT1	293.736	0.639678	0.33621	1.90261	0.0570911	0.331943	217.899	221.932	300.818	397.545	330.484
1231	ENSG00000166949	SMAD3	333.848	0.751913	0.395164	1.90279	0.0570684	0.331943	244.8	228	318.458	596.318	281.663
1232	ENSG00000171365	CLCN5	46.7487	1.06536	0.55924	1.90501	0.0567786	0.331943	27.7978	28.6084	57.5639	66.2576	53.516
1233	ENSG00000288920	RPSAP58	540.13	0.635771	0.333896	1.9041	0.0568975	0.331943	335.367	475.073	620.205	752.686	517.321
1234	ENSG00000151693	ASAP2	35.6934	-1.22869	0.646268	-1.90121	0.0572746	0.332698	51.112	58.0838	27.8535	13.2515	28.1663
1235	ENSG00000160712	IL6R	28.0928	1.40441	0.738807	1.90091	0.0573137	0.332698	18.8308	9.53614	35.2811	25.1779	51.6382
1236	ENSG00000226419	SLC16A1-AS1	110.852	0.861576	0.45348	1.89992	0.0574435	0.333182	90.567	58.0838	147.624	160.343	97.6431
1237	ENSG00000256849	TCP1P3	90.1523	2.66669	1.4043	1.89895	0.0575716	0.333655	35.8681	6.93537	77.9898	307.435	22.533
1238	ENSG00000157227	MMP14	2044.42	0.602188	0.317223	1.89831	0.0576551	0.333869	1500.18	1618.54	1745.49	3026.65	2331.23
1239	ENSG00000006015	REX1BD	139.961	0.906324	0.478309	1.89485	0.0581123	0.334883	84.29	98.8291	104.915	275.631	136.137
1240	ENSG00000008952	SEC62	535.086	0.581046	0.306624	1.89498	0.0580951	0.334883	394.549	429.993	636.917	673.177	540.793
1241	ENSG00000099385	BCL7C	103.709	1.04539	0.551407	1.89585	0.0579793	0.334883	71.7362	54.6161	146.695	194.797	50.6993
1242	ENSG00000101825	MXRA5	201.613	0.821154	0.433537	1.89408	0.0582142	0.334883	128.228	147.377	176.406	377.668	178.387
1243	ENSG00000126067	PSMB2	160.266	0.717166	0.378176	1.89638	0.0579094	0.334883	116.571	114.434	168.978	217.325	184.02
1244	ENSG00000168393	DTYMK	36.0023	-1.33044	0.70252	-1.89381	0.0582506	0.334883	65.4593	47.6807	39.9234	11.9264	15.022
1245	ENSG00000173039	RELA	226.604	0.652047	0.344037	1.89529	0.0580546	0.334883	167.683	169.917	262.751	249.128	283.541
1246	ENSG00000203950	RTL8A	57.7904	-1.04029	0.54911	-1.89451	0.0581575	0.334883	95.9472	71.0876	25.9966	42.4048	53.516
1247	ENSG00000204843	DCTN1	376.12	0.722664	0.381368	1.89492	0.0581025	0.334883	305.776	234.936	454.012	597.643	288.235
1248	ENSG00000114650	SCAP	60.1509	-1.02436	0.541046	-1.8933	0.0583186	0.335005	92.3604	80.6237	25.9966	46.3803	55.3937
1249	ENSG00000141568	FOXK2	25.9214	-1.64969	0.871888	-1.89209	0.0584785	0.335654	44.8351	43.3461	24.1397	1.32515	15.9609
1250	ENSG00000032444	PNPLA6	53.549	0.99862	0.528736	1.88869	0.0589331	0.336727	33.178	33.8099	62.2062	66.2576	72.2935
1251	ENSG00000118263	KLF7	29.9928	1.39821	0.740023	1.88942	0.0588355	0.336727	20.6242	9.53614	26.9251	60.957	31.9218
1252	ENSG00000134013	LOXL2	244.873	-0.645404	0.341425	-1.89033	0.0587142	0.336727	334.47	290.419	208.901	209.374	181.203
1253	ENSG00000142546	NOSIP	118.196	0.789901	0.418304	1.88834	0.0589802	0.336727	69.0461	95.3614	125.341	144.441	156.792
1254	ENSG00000160688	FLAD1	86.0472	0.886465	0.469353	1.8887	0.0589326	0.336727	60.9758	52.8822	77.9898	128.54	109.849
1255	ENSG00000175727	MLXIP	155.649	0.789708	0.417924	1.8896	0.0588119	0.336727	108.501	108.365	259.038	141.791	160.548
1256	ENSG00000196204	RNF216P1	30.4479	-1.40483	0.743993	-1.88824	0.0589942	0.336727	67.2527	30.3423	22.2828	7.95091	24.4108
1257	ENSG00000106665	CLIP2	115.071	0.818796	0.433818	1.88742	0.0591039	0.337085	69.9428	87.5591	124.412	178.895	114.543
1258	ENSG00000108175	ZMIZ1	211.876	0.675802	0.358564	1.88475	0.0594641	0.337261	158.716	153.445	247.896	212.024	287.296
1259	ENSG00000126062	TMEM115	74.2332	1.04754	0.555341	1.8863	0.0592541	0.337261	54.6989	35.5438	52.9217	144.441	83.56
1260	ENSG00000140829	DHX38	87.522	0.921473	0.488804	1.88516	0.0594083	0.337261	52.9055	60.6845	85.4174	155.043	83.56
1261	ENSG00000151116	UEVLD	59.0409	0.98586	0.52278	1.8858	0.0593216	0.337261	44.8351	29.4753	68.7053	80.8342	71.3546
1262	ENSG00000163430	FSTL1	664.128	-0.595155	0.315626	-1.88563	0.0593445	0.337261	907.463	759.423	634.132	441.275	578.348
1263	ENSG00000164022	AIMP1	151.012	0.771053	0.409078	1.88486	0.0594491	0.337261	94.1538	117.901	221.9	186.846	134.259
1264	ENSG00000186166	CENATAC	30.6746	-1.46526	0.776877	-1.8861	0.059282	0.337261	58.2857	41.6122	23.2113	3.97545	26.2885
1265	ENSG00000122884	P4HA1	69.7948	1.01373	0.538196	1.88356	0.0596239	0.337633	40.3516	45.9469	64.9915	133.84	63.8436
1266	ENSG00000215021	PHB2	90.5242	-0.900421	0.478013	-1.88367	0.0596091	0.337633	131.815	119.635	94.7019	46.3803	60.0881
1267	ENSG00000102158	MAGT1	178.693	0.688321	0.365796	1.88171	0.0598758	0.338258	119.261	142.175	221.9	212.024	198.103
1268	ENSG00000113194	FAF2	246.016	0.751563	0.399278	1.8823	0.0597948	0.338258	160.51	188.122	340.741	360.441	180.264
1269	ENSG00000212907	MT-ND4L	962.263	-0.552138	0.293386	-1.88195	0.0598425	0.338258	1335.19	1042.91	784.541	860.023	788.656
1270	ENSG00000144791	LIMD1	40.0051	1.37628	0.731837	1.88058	0.0600287	0.338855	22.4176	18.2054	25.9966	103.362	30.044
1271	ENSG00000062725	APPBP2	51.66	1.02843	0.547488	1.87845	0.0603197	0.33973	34.0747	29.4753	51.0648	74.2085	69.4769
1272	ENSG00000064313	TAF2	157.263	0.715794	0.381125	1.87811	0.0603662	0.33973	98.6373	128.304	190.332	193.472	175.57
1273	ENSG00000089693	MLF2	360.485	0.647325	0.344672	1.87809	0.0603688	0.33973	251.973	286.084	322.172	433.324	508.871
1274	ENSG00000095787	WAC	460.721	0.646333	0.34415	1.87806	0.0603732	0.33973	293.222	394.449	412.232	657.275	546.426
1275	ENSG00000100280	AP1B1	238.475	0.817887	0.435989	1.87594	0.0606642	0.34017	176.65	149.977	187.547	458.502	219.697
1276	ENSG00000124006	OBSL1	58.7116	1.07603	0.57335	1.87675	0.0605529	0.34017	26.9011	43.3461	59.4208	111.313	52.5771
1277	ENSG00000137033	IL33	24.4713	-1.53741	0.81977	-1.87541	0.0607362	0.34017	40.3516	40.7453	24.1397	3.97545	13.1443
1278	ENSG00000162496	DHRS3	31.6068	1.30068	0.693107	1.8766	0.0605729	0.34017	18.8308	14.7377	25.0682	54.3312	45.0661
1279	ENSG00000184117	NIPSNAP1	29.5244	-1.61236	0.859678	-1.87554	0.0607189	0.34017	47.5252	52.0153	16.7121	1.32515	30.044
1280	ENSG00000198954	KIFBP	106.577	-0.7959	0.424346	-1.87559	0.0607113	0.34017	130.022	156.046	96.5588	74.2085	76.049
1281	ENSG00000070614	NDST1	395.843	0.735675	0.392505	1.87431	0.0608883	0.340512	263.631	301.689	280.392	661.25	472.255
1282	ENSG00000171241	SHCBP1	254.953	0.887185	0.473348	1.87428	0.0608921	0.340512	174.857	162.981	511.576	283.582	141.77
1283	ENSG00000070831	CDC42	51.9331	1.01583	0.542559	1.8723	0.0611652	0.341043	29.5912	34.6769	62.2062	76.8588	56.3326
1284	ENSG00000134575	ACP2	71.7899	0.925768	0.494376	1.8726	0.0611239	0.341043	43.0417	50.2815	113.271	78.1839	74.1712
1285	ENSG00000173113	TRMT112	28.3331	-1.38934	0.741822	-1.87288	0.0610848	0.341043	60.0791	30.3423	25.0682	9.27606	16.8998
1286	ENSG00000182827	ACBD3	468.189	0.585152	0.312546	1.87221	0.0611776	0.341043	355.991	364.107	463.297	569.815	587.737
1287	ENSG00000035862	TIMP2	1527.16	0.617863	0.330376	1.87018	0.0614586	0.341824	1170.2	1141.74	1253.41	2349.49	1720.96
1288	ENSG00000054598	FOXC1	58.7131	0.965115	0.515909	1.87071	0.0613855	0.341824	32.2813	42.4792	77.9898	67.5827	73.2324
1289	ENSG00000171940	ZNF217	67.2276	1.0069	0.538399	1.87017	0.0614605	0.341824	33.178	50.2815	75.2045	119.264	58.2103
1290	ENSG00000155744	FAM126B	28.25	1.3045	0.697958	1.86903	0.0616188	0.342438	14.3472	15.6046	37.138	45.0551	29.1052
1291	ENSG00000085719	CPNE3	115.755	-0.756353	0.404816	-1.86839	0.0617084	0.34267	151.543	155.179	96.5588	83.4845	92.0099
1292	ENSG00000165915	SLC39A13	67.0808	-0.917542	0.491223	-1.86787	0.0617801	0.342803	94.1538	92.7606	39.9234	50.3557	58.2103
1293	ENSG00000070961	ATP2B1	1638.87	0.553146	0.29638	1.86634	0.0619937	0.343523	1240.14	1319.45	1928.39	2189.15	1517.22
1294	ENSG00000148229	POLE3	468.282	0.691657	0.370612	1.86626	0.0620057	0.343523	298.602	385.78	785.469	429.349	442.211
1295	ENSG00000196876	SCN8A	53.5462	-1.07851	0.578169	-1.86539	0.0621266	0.343927	81.5999	75.4222	55.707	21.2024	33.7995
1296	ENSG00000131100	ATP6V1E1	118.907	-0.79622	0.427045	-1.86449	0.0622532	0.344126	182.031	136.974	111.414	92.7606	71.3546
1297	ENSG00000167513	CDT1	58.8988	-0.948139	0.508535	-1.86445	0.0622585	0.344126	86.9801	78.8899	43.6372	37.1042	47.8827
1298	ENSG00000138434	ITPRID2	72.0181	-0.923108	0.495377	-1.86345	0.0623996	0.34464	115.675	84.9583	46.4225	68.9079	44.1272
1299	ENSG00000078018	MAP2	28.6925	1.85438	0.995506	1.86275	0.0624977	0.344801	15.2439	6.93537	7.4276	100.711	13.1443
1300	ENSG00000117614	SYF2	197.924	0.670915	0.360212	1.86256	0.0625249	0.344801	131.815	160.381	250.682	212.024	234.719
1301	ENSG00000196628	TCF4	335.544	0.715809	0.384609	1.86113	0.0627255	0.345641	236.729	247.073	272.964	569.815	351.14
1302	ENSG00000125844	RRBP1	2251.62	0.622262	0.334475	1.86041	0.0628273	0.34567	1690.28	1711.3	2170.72	3681.27	2004.5
1303	ENSG00000139083	ETV6	71.6811	1.09748	0.589899	1.86046	0.0628208	0.34567	47.5252	37.2776	45.4941	157.693	70.4157
1304	ENSG00000163535	SGO2	161.36	-0.976609	0.525098	-1.85986	0.0629054	0.345835	270.804	187.255	201.474	99.3863	47.8827
1305	ENSG00000104321	TRPA1	113.12	-0.771915	0.415187	-1.8592	0.0629992	0.346085	147.059	154.312	85.4174	75.5336	103.276
1306	ENSG00000160908	ZNF394	39.532	1.3217	0.71124	1.85831	0.0631252	0.346512	19.7275	21.673	45.4941	90.1103	20.6553
1307	ENSG00000047932	GOPC	174.582	0.804952	0.433326	1.85761	0.0632241	0.346688	115.675	125.704	168.978	147.092	315.462
1308	ENSG00000122966	CIT	86.5262	-0.894057	0.481348	-1.8574	0.063254	0.346688	113.881	125.704	90.0597	56.9815	46.0049
1309	ENSG00000110717	NDUFS8	174.307	0.681965	0.367262	1.85689	0.0633269	0.346822	129.125	126.571	202.402	226.601	186.836
1310	ENSG00000154027	AK5	69.9445	-0.999253	0.539391	-1.85256	0.0639458	0.349678	109.398	91.0268	66.8484	25.1779	57.2715
1311	ENSG00000168807	SNTB2	225.846	0.789179	0.425977	1.85263	0.0639351	0.349678	156.026	157.78	223.757	416.097	175.57
1312	ENSG00000145495	MARCHF6	198.034	0.691843	0.373605	1.8518	0.0640539	0.349816	157.82	131.772	250.682	184.196	265.702
1313	ENSG00000162775	RBM15	43.9469	1.25852	0.679657	1.8517	0.0640687	0.349816	25.1077	22.54	47.351	99.3863	25.3497
1314	ENSG00000141376	BCAS3	68.736	0.925086	0.499733	1.85116	0.0641465	0.349974	47.5252	41.6122	66.8484	106.012	81.6822
1315	ENSG00000044090	CUL7	49.3467	1.1282	0.609797	1.85012	0.0642959	0.350523	35.8681	21.673	68.7053	84.8097	35.6773
1316	ENSG00000002549	LAP3	66.3134	-0.944473	0.510722	-1.84929	0.0644158	0.350643	90.567	96.2283	56.6355	31.8036	56.3326
1317	ENSG00000174276	ZNHIT2	25.4334	1.5294	0.826873	1.84962	0.0643688	0.350643	10.7604	13.0038	41.7803	50.3557	11.2665
1318	ENSG00000152767	FARP1	163.393	-0.733835	0.396899	-1.84892	0.064469	0.350666	241.213	188.122	96.5588	141.791	149.281
1319	ENSG00000165494	PCF11	113.569	0.811825	0.439177	1.84851	0.064528	0.350721	81.5999	74.5553	156.908	159.018	95.7654
1320	ENSG00000173207	CKS1B	39.0483	-1.48471	0.803342	-1.84817	0.0645781	0.350727	57.389	70.2207	51.0648	5.30061	11.2665
1321	ENSG00000112576	CCND3	309.748	0.793876	0.42977	1.84721	0.0647164	0.351213	194.584	234.936	216.329	588.367	314.524
1322	ENSG00000167985	SDHAF2	56.616	1.01371	0.549001	1.84647	0.0648246	0.351533	33.178	37.2776	77.9898	46.3803	88.2544
1323	ENSG00000005339	CREBBP	264.12	0.702821	0.380807	1.84561	0.064949	0.351942	184.721	198.525	220.043	418.748	298.563
1324	ENSG00000092010	PSME1	195.389	0.8388	0.45491	1.84388	0.0652005	0.353038	117.468	147.377	244.182	345.864	122.054
[truncated: 61,379 more rows]

## Sheet: ET075 vs ET075CBD075_6h
	gene		baseMean	log2FoldChange	lfcSE	stat	pvalue	padj	K22	K23	K40	K42
[truncated: 62,703 more rows]

## Sheet: ET075 vs ET075CBD075_12h
	gene		baseMean	log2FoldChange	lfcSE	stat	pvalue	padj	K10	K11	K12	K25	K26	K27
[truncated: 62,703 more rows]

[truncated: 2 more sheets: Venn, Non-redundant genes]
