# Supplementary material for: Cannabidiol (CBD) modulates the transcriptional profile of ethanol-exposed human dermal fibroblast cells
Source: J Appl Genet. 2024 Oct 28;65(4):773–96. doi: 10.1007/s13353-024-00915-7 (PMC11561130; doi:10.1007/s13353-024-00915-7)
Supplement: Supplementary file 12 — Supplementary file12 (XLSX 425 KB) [file 13353_2024_915_MOESM12_ESM.xlsx]

## Sheet: Annotation
userId	geneSymbol	geneName	entrezgene	gLink
ENSG00000228253	ATP8	ATP synthase F0 subunit 8	4509	https://www.ncbi.nlm.nih.gov/gene/?term=4509
ENSG00000102317	RBM3	RNA binding motif protein 3	5935	https://www.ncbi.nlm.nih.gov/gene/?term=5935
ENSG00000080824	HSP90AA1	heat shock protein 90 alpha family class A member 1	3320	https://www.ncbi.nlm.nih.gov/gene/?term=3320
ENSG00000104687	GSR	glutathione-disulfide reductase	2936	https://www.ncbi.nlm.nih.gov/gene/?term=2936
ENSG00000105221	AKT2	AKT serine/threonine kinase 2	208	https://www.ncbi.nlm.nih.gov/gene/?term=208
ENSG00000159335	PTMS	parathymosin	5763	https://www.ncbi.nlm.nih.gov/gene/?term=5763
ENSG00000163191	S100A11	S100 calcium binding protein A11	6282	https://www.ncbi.nlm.nih.gov/gene/?term=6282
ENSG00000073712	FERMT2	fermitin family member 2	10979	https://www.ncbi.nlm.nih.gov/gene/?term=10979
ENSG00000116649	SRM	spermidine synthase	6723	https://www.ncbi.nlm.nih.gov/gene/?term=6723
ENSG00000110651	CD81	CD81 molecule	975	https://www.ncbi.nlm.nih.gov/gene/?term=975
ENSG00000139329	LUM	lumican	4060	https://www.ncbi.nlm.nih.gov/gene/?term=4060
ENSG00000100316	RPL3	ribosomal protein L3	6122	https://www.ncbi.nlm.nih.gov/gene/?term=6122
ENSG00000118971	CCND2	cyclin D2	894	https://www.ncbi.nlm.nih.gov/gene/?term=894
ENSG00000087266	SH3BP2	SH3 domain binding protein 2	6452	https://www.ncbi.nlm.nih.gov/gene/?term=6452
ENSG00000119616	FCF1	FCF1, rRNA-processing protein	51077	https://www.ncbi.nlm.nih.gov/gene/?term=51077
ENSG00000146223	RPL7L1	ribosomal protein L7 like 1	285855	https://www.ncbi.nlm.nih.gov/gene/?term=285855
ENSG00000141569	TRIM65	tripartite motif containing 65	201292	https://www.ncbi.nlm.nih.gov/gene/?term=201292
ENSG00000108821	COL1A1	collagen type I alpha 1 chain	1277	https://www.ncbi.nlm.nih.gov/gene/?term=1277
ENSG00000160993	ALKBH4	alkB homolog 4, lysine demethylase	54784	https://www.ncbi.nlm.nih.gov/gene/?term=54784
ENSG00000137285	TUBB2B	tubulin beta 2B class IIb	347733	https://www.ncbi.nlm.nih.gov/gene/?term=347733
ENSG00000120594	PLXDC2	plexin domain containing 2	84898	https://www.ncbi.nlm.nih.gov/gene/?term=84898
ENSG00000123131	PRDX4	peroxiredoxin 4	10549	https://www.ncbi.nlm.nih.gov/gene/?term=10549
ENSG00000168610	STAT3	signal transducer and activator of transcription 3	6774	https://www.ncbi.nlm.nih.gov/gene/?term=6774
ENSG00000136819	C9orf78	chromosome 9 open reading frame 78	51759	https://www.ncbi.nlm.nih.gov/gene/?term=51759
ENSG00000165632	TAF3	TATA-box binding protein associated factor 3	83860	https://www.ncbi.nlm.nih.gov/gene/?term=83860
ENSG00000187840	EIF4EBP1	eukaryotic translation initiation factor 4E binding protein 1	1978	https://www.ncbi.nlm.nih.gov/gene/?term=1978
ENSG00000129219	PLD2	phospholipase D2	5338	https://www.ncbi.nlm.nih.gov/gene/?term=5338
ENSG00000224074	LINC00691	long intergenic non-protein coding RNA 691	152024	https://www.ncbi.nlm.nih.gov/gene/?term=152024
ENSG00000083099	LYRM2	LYR motif containing 2	57226	https://www.ncbi.nlm.nih.gov/gene/?term=57226
ENSG00000105258	POLR2I	RNA polymerase II subunit I	5438	https://www.ncbi.nlm.nih.gov/gene/?term=5438
ENSG00000115414	FN1	fibronectin 1	2335	https://www.ncbi.nlm.nih.gov/gene/?term=2335
ENSG00000120802	TMPO	thymopoietin	7112	https://www.ncbi.nlm.nih.gov/gene/?term=7112
ENSG00000092201	SUPT16H	SPT16 homolog, facilitates chromatin remodeling subunit	11198	https://www.ncbi.nlm.nih.gov/gene/?term=11198
ENSG00000088888	MAVS	mitochondrial antiviral signaling protein	57506	https://www.ncbi.nlm.nih.gov/gene/?term=57506
ENSG00000198034	RPS4X	ribosomal protein S4 X-linked	6191	https://www.ncbi.nlm.nih.gov/gene/?term=6191
ENSG00000128272	ATF4	activating transcription factor 4	468	https://www.ncbi.nlm.nih.gov/gene/?term=468
ENSG00000264229	RNU4ATAC	RNA, U4atac small nuclear (U12-dependent splicing)	100151683	https://www.ncbi.nlm.nih.gov/gene/?term=100151683
ENSG00000243279	PRAF2	PRA1 domain family member 2	11230	https://www.ncbi.nlm.nih.gov/gene/?term=11230
ENSG00000249992	TMEM158	transmembrane protein 158 (gene/pseudogene)	25907	https://www.ncbi.nlm.nih.gov/gene/?term=25907
ENSG00000113141	IK	IK cytokine	3550	https://www.ncbi.nlm.nih.gov/gene/?term=3550
ENSG00000090857	PDPR	pyruvate dehydrogenase phosphatase regulatory subunit	55066	https://www.ncbi.nlm.nih.gov/gene/?term=55066
ENSG00000164171	ITGA2	integrin subunit alpha 2	3673	https://www.ncbi.nlm.nih.gov/gene/?term=3673
ENSG00000120913	PDLIM2	PDZ and LIM domain 2	64236	https://www.ncbi.nlm.nih.gov/gene/?term=64236
ENSG00000167526	RPL13	ribosomal protein L13	6137	https://www.ncbi.nlm.nih.gov/gene/?term=6137
ENSG00000118181	RPS25	ribosomal protein S25	6230	https://www.ncbi.nlm.nih.gov/gene/?term=6230
ENSG00000176014	TUBB6	tubulin beta 6 class V	84617	https://www.ncbi.nlm.nih.gov/gene/?term=84617
ENSG00000166598	HSP90B1	heat shock protein 90 beta family member 1	7184	https://www.ncbi.nlm.nih.gov/gene/?term=7184
ENSG00000070814	TCOF1	treacle ribosome biogenesis factor 1	6949	https://www.ncbi.nlm.nih.gov/gene/?term=6949
ENSG00000085662	AKR1B1	aldo-keto reductase family 1 member B	231	https://www.ncbi.nlm.nih.gov/gene/?term=231
ENSG00000177954	RPS27	ribosomal protein S27	6232	https://www.ncbi.nlm.nih.gov/gene/?term=6232
ENSG00000214087	ARL16	ADP ribosylation factor like GTPase 16	339231	https://www.ncbi.nlm.nih.gov/gene/?term=339231
ENSG00000163382	NAXE	NAD(P)HX epimerase	128240	https://www.ncbi.nlm.nih.gov/gene/?term=128240
ENSG00000164091	WDR82	WD repeat domain 82	80335	https://www.ncbi.nlm.nih.gov/gene/?term=80335
ENSG00000123908	AGO2	argonaute RISC catalytic component 2	27161	https://www.ncbi.nlm.nih.gov/gene/?term=27161
ENSG00000163754	GYG1	glycogenin 1	2992	https://www.ncbi.nlm.nih.gov/gene/?term=2992
ENSG00000244509	APOBEC3C	apolipoprotein B mRNA editing enzyme catalytic subunit 3C	27350	https://www.ncbi.nlm.nih.gov/gene/?term=27350
ENSG00000275023	MLLT6	MLLT6, PHD finger containing	4302	https://www.ncbi.nlm.nih.gov/gene/?term=4302
ENSG00000162063	CCNF	cyclin F	899	https://www.ncbi.nlm.nih.gov/gene/?term=899
ENSG00000117411	B4GALT2	beta-1,4-galactosyltransferase 2	8704	https://www.ncbi.nlm.nih.gov/gene/?term=8704
ENSG00000196405	EVL	Enah/Vasp-like	51466	https://www.ncbi.nlm.nih.gov/gene/?term=51466
ENSG00000026025	VIM	vimentin	7431	https://www.ncbi.nlm.nih.gov/gene/?term=7431
ENSG00000204138	PHACTR4	phosphatase and actin regulator 4	65979	https://www.ncbi.nlm.nih.gov/gene/?term=65979
ENSG00000166147	FBN1	fibrillin 1	2200	https://www.ncbi.nlm.nih.gov/gene/?term=2200
ENSG00000164104	HMGB2	high mobility group box 2	3148	https://www.ncbi.nlm.nih.gov/gene/?term=3148
ENSG00000078401	EDN1	endothelin 1	1906	https://www.ncbi.nlm.nih.gov/gene/?term=1906
ENSG00000125354	SEPT6	septin 6	23157	https://www.ncbi.nlm.nih.gov/gene/?term=23157
ENSG00000108848	LUC7L3	LUC7 like 3 pre-mRNA splicing factor	51747	https://www.ncbi.nlm.nih.gov/gene/?term=51747
ENSG00000168542	COL3A1	collagen type III alpha 1 chain	1281	https://www.ncbi.nlm.nih.gov/gene/?term=1281
ENSG00000231500	RPS18	ribosomal protein S18	6222	https://www.ncbi.nlm.nih.gov/gene/?term=6222
ENSG00000182985	CADM1	cell adhesion molecule 1	23705	https://www.ncbi.nlm.nih.gov/gene/?term=23705
ENSG00000100345	MYH9	myosin heavy chain 9	4627	https://www.ncbi.nlm.nih.gov/gene/?term=4627
ENSG00000065000	AP3D1	adaptor related protein complex 3 subunit delta 1	8943	https://www.ncbi.nlm.nih.gov/gene/?term=8943
ENSG00000162493	PDPN	podoplanin	10630	https://www.ncbi.nlm.nih.gov/gene/?term=10630
ENSG00000104808	DHDH	dihydrodiol dehydrogenase	27294	https://www.ncbi.nlm.nih.gov/gene/?term=27294
ENSG00000171812	COL8A2	collagen type VIII alpha 2 chain	1296	https://www.ncbi.nlm.nih.gov/gene/?term=1296
ENSG00000136448	NMT1	N-myristoyltransferase 1	4836	https://www.ncbi.nlm.nih.gov/gene/?term=4836
ENSG00000198786	ND5	NADH dehydrogenase, subunit 5 (complex I)	4540	https://www.ncbi.nlm.nih.gov/gene/?term=4540
ENSG00000188375	H3F3C	H3 histone family member 3C	440093	https://www.ncbi.nlm.nih.gov/gene/?term=440093
ENSG00000240038	AMY2B	amylase, alpha 2B (pancreatic)	280	https://www.ncbi.nlm.nih.gov/gene/?term=280
ENSG00000131711	MAP1B	microtubule associated protein 1B	4131	https://www.ncbi.nlm.nih.gov/gene/?term=4131
ENSG00000187109	NAP1L1	nucleosome assembly protein 1 like 1	4673	https://www.ncbi.nlm.nih.gov/gene/?term=4673
ENSG00000008838	MED24	mediator complex subunit 24	9862	https://www.ncbi.nlm.nih.gov/gene/?term=9862
ENSG00000034510	TMSB10	thymosin beta 10	9168	https://www.ncbi.nlm.nih.gov/gene/?term=9168
ENSG00000088298	EDEM2	ER degradation enhancing alpha-mannosidase like protein 2	55741	https://www.ncbi.nlm.nih.gov/gene/?term=55741
ENSG00000161011	SQSTM1	sequestosome 1	8878	https://www.ncbi.nlm.nih.gov/gene/?term=8878
ENSG00000169592	INO80E	INO80 complex subunit E	283899	https://www.ncbi.nlm.nih.gov/gene/?term=283899
ENSG00000088832	FKBP1A	FKBP prolyl isomerase 1A	2280	https://www.ncbi.nlm.nih.gov/gene/?term=2280
ENSG00000005075	POLR2J	RNA polymerase II subunit J	5439	https://www.ncbi.nlm.nih.gov/gene/?term=5439
ENSG00000147274	RBMX	RNA binding motif protein X-linked	27316	https://www.ncbi.nlm.nih.gov/gene/?term=27316
ENSG00000181649	PHLDA2	pleckstrin homology like domain family A member 2	7262	https://www.ncbi.nlm.nih.gov/gene/?term=7262
ENSG00000109881	CCDC34	coiled-coil domain containing 34	91057	https://www.ncbi.nlm.nih.gov/gene/?term=91057
ENSG00000148344	PTGES	prostaglandin E synthase	9536	https://www.ncbi.nlm.nih.gov/gene/?term=9536
ENSG00000214063	TSPAN4	tetraspanin 4	7106	https://www.ncbi.nlm.nih.gov/gene/?term=7106
ENSG00000167671	UBXN6	UBX domain protein 6	80700	https://www.ncbi.nlm.nih.gov/gene/?term=80700
ENSG00000196227	FAM217B	family with sequence similarity 217 member B	63939	https://www.ncbi.nlm.nih.gov/gene/?term=63939
ENSG00000101439	CST3	cystatin C	1471	https://www.ncbi.nlm.nih.gov/gene/?term=1471
ENSG00000187678	SPRY4	sprouty RTK signaling antagonist 4	81848	https://www.ncbi.nlm.nih.gov/gene/?term=81848
ENSG00000152082	MZT2B	mitotic spindle organizing protein 2B	80097	https://www.ncbi.nlm.nih.gov/gene/?term=80097
ENSG00000158747	NBL1	NBL1, DAN family BMP antagonist	4681	https://www.ncbi.nlm.nih.gov/gene/?term=4681
ENSG00000158747	MICOS10-NBL1	MICOS10-NBL1 readthrough	100532736	https://www.ncbi.nlm.nih.gov/gene/?term=100532736
ENSG00000061273	HDAC7	histone deacetylase 7	51564	https://www.ncbi.nlm.nih.gov/gene/?term=51564
ENSG00000172301	COPRS	coordinator of PRMT5 and differentiation stimulator	55352	https://www.ncbi.nlm.nih.gov/gene/?term=55352
ENSG00000238227	TMEM250	transmembrane protein 250	90120	https://www.ncbi.nlm.nih.gov/gene/?term=90120

## Sheet: GO BP
geneSet	description	link	size	overlap	expect	enrichmentRatio	pValue	FDR	overlapId	userId
GO:0006413	translational initiation	http://amigo.geneontology.org/amigo/term/GO:0006413	192	9	1.115	8.07177	1.66956e-06	0.00141913	468;1978;6122;6137;6191;6222;6230;6232;27161	ENSG00000100316;ENSG00000187840;ENSG00000198034;ENSG00000128272;ENSG00000167526;ENSG00000118181;ENSG00000177954;ENSG00000123908;ENSG00000231500
GO:0034248	regulation of cellular amide metabolic process	http://amigo.geneontology.org/amigo/term/GO:0034248	385	11	2.2358	4.91993	1.35427e-05	0.00575565	208;468;1978;3673;5935;6191;6774;6949;7431;27161;55066	ENSG00000102317;ENSG00000105221;ENSG00000168610;ENSG00000187840;ENSG00000198034;ENSG00000128272;ENSG00000090857;ENSG00000164171;ENSG00000070814;ENSG00000123908;ENSG00000026025
GO:0010608	posttranscriptional regulation of gene expression	http://amigo.geneontology.org/amigo/term/GO:0010608	486	12	2.82234	4.25179	2.29366e-05	0.00649871	208;468;1978;3673;5438;5439;5935;6191;6774;6949;7431;27161	ENSG00000102317;ENSG00000105221;ENSG00000168610;ENSG00000187840;ENSG00000105258;ENSG00000198034;ENSG00000128272;ENSG00000164171;ENSG00000070814;ENSG00000123908;ENSG00000026025;ENSG00000005075
GO:0090150	establishment of protein localization to membrane	http://amigo.geneontology.org/amigo/term/GO:0090150	313	9	1.81768	4.95137	8.27773e-05	0.0175902	208;3320;4836;6122;6137;6191;6222;6230;6232	ENSG00000080824;ENSG00000105221;ENSG00000100316;ENSG00000198034;ENSG00000167526;ENSG00000118181;ENSG00000177954;ENSG00000231500;ENSG00000136448
GO:0043062	extracellular structure organization	http://amigo.geneontology.org/amigo/term/GO:0043062	400	10	2.32291	4.30494	0.000104979	0.0178465	1277;1281;1296;1471;2200;2335;3673;4060;10549;10630	ENSG00000139329;ENSG00000108821;ENSG00000123131;ENSG00000115414;ENSG00000164171;ENSG00000166147;ENSG00000168542;ENSG00000162493;ENSG00000171812;ENSG00000101439
GO:0070972	protein localization to endoplasmic reticulum	http://amigo.geneontology.org/amigo/term/GO:0070972	137	6	0.795597	7.5415	0.000143956	0.0203938	6122;6137;6191;6222;6230;6232	ENSG00000100316;ENSG00000198034;ENSG00000167526;ENSG00000118181;ENSG00000177954;ENSG00000231500
GO:0007229	integrin-mediated signaling pathway	http://amigo.geneontology.org/amigo/term/GO:0007229	101	5	0.586535	8.52464	0.0003004	0.0364771	1281;3673;4627;10979;65979	ENSG00000073712;ENSG00000164171;ENSG00000204138;ENSG00000168542;ENSG00000100345
GO:0006605	protein targeting	http://amigo.geneontology.org/amigo/term/GO:0006605	412	9	2.3926	3.7616	0.000634031	0.0673658	208;3320;6122;6137;6191;6222;6230;6232;8943	ENSG00000080824;ENSG00000105221;ENSG00000100316;ENSG00000198034;ENSG00000167526;ENSG00000118181;ENSG00000177954;ENSG00000231500;ENSG00000065000
GO:0006401	RNA catabolic process	http://amigo.geneontology.org/amigo/term/GO:0006401	341	8	1.98028	4.03983	0.000810972	0.0765918	6122;6137;6191;6222;6230;6232;7431;27161	ENSG00000100316;ENSG00000198034;ENSG00000167526;ENSG00000118181;ENSG00000177954;ENSG00000123908;ENSG00000026025;ENSG00000231500
GO:0001667	ameboidal-type cell migration	http://amigo.geneontology.org/amigo/term/GO:0001667	381	8	2.21257	3.6157	0.00164768	0.140053	1906;2335;3673;4627;27161;51466;51564;65979	ENSG00000115414;ENSG00000164171;ENSG00000123908;ENSG00000196405;ENSG00000204138;ENSG00000078401;ENSG00000100345;ENSG00000061273
GO:0051235	maintenance of location	http://amigo.geneontology.org/amigo/term/GO:0051235	309	7	1.79445	3.90092	0.00211513	0.156641	2200;2280;7184;8943;9168;83860;100532736	ENSG00000165632;ENSG00000166598;ENSG00000166147;ENSG00000065000;ENSG00000034510;ENSG00000088832;ENSG00000158747
GO:2000147	positive regulation of cell motility	http://amigo.geneontology.org/amigo/term/GO:2000147	493	9	2.86299	3.14357	0.0022114	0.156641	208;1277;1906;2335;3673;6774;10630;27161;51564	ENSG00000105221;ENSG00000108821;ENSG00000168610;ENSG00000115414;ENSG00000164171;ENSG00000123908;ENSG00000078401;ENSG00000162493;ENSG00000061273
GO:0032963	collagen metabolic process	http://amigo.geneontology.org/amigo/term/GO:0032963	97	4	0.563306	7.10094	0.00243667	0.159321	1277;1471;3673;7431	ENSG00000108821;ENSG00000164171;ENSG00000026025;ENSG00000101439
GO:0071826	ribonucleoprotein complex subunit organization	http://amigo.geneontology.org/amigo/term/GO:0071826	245	6	1.42278	4.21709	0.00300955	0.182723	3320;6122;6232;27161;27316;51747	ENSG00000080824;ENSG00000100316;ENSG00000177954;ENSG00000123908;ENSG00000108848;ENSG00000147274
GO:0022613	ribonucleoprotein complex biogenesis	http://amigo.geneontology.org/amigo/term/GO:0022613	440	8	2.5552	3.13087	0.0039964	0.222089	3320;6122;6232;27161;27316;51077;51747;285855	ENSG00000080824;ENSG00000100316;ENSG00000119616;ENSG00000146223;ENSG00000177954;ENSG00000123908;ENSG00000108848;ENSG00000147274
GO:0060485	mesenchyme development	http://amigo.geneontology.org/amigo/term/GO:0060485	262	6	1.52151	3.94346	0.0041805	0.222089	1277;1906;2335;6949;10630;65979	ENSG00000108821;ENSG00000115414;ENSG00000070814;ENSG00000204138;ENSG00000078401;ENSG00000162493
GO:0010324	membrane invagination	http://amigo.geneontology.org/amigo/term/GO:0010324	60	3	0.348437	8.60988	0.00509769	0.254884	3673;4627;54784	ENSG00000160993;ENSG00000164171;ENSG00000100345
GO:0006091	generation of precursor metabolites and energy	http://amigo.geneontology.org/amigo/term/GO:0006091	469	8	2.72361	2.93727	0.00583939	0.257591	208;231;2936;2992;4509;4540;6774;27294	ENSG00000228253;ENSG00000104687;ENSG00000105221;ENSG00000168610;ENSG00000085662;ENSG00000163754;ENSG00000104808;ENSG00000198786
GO:0007006	mitochondrial membrane organization	http://amigo.geneontology.org/amigo/term/GO:0007006	126	4	0.731717	5.46659	0.00620053	0.257591	3320;4509;4836;6774	ENSG00000228253;ENSG00000080824;ENSG00000168610;ENSG00000136448
GO:0048863	stem cell differentiation	http://amigo.geneontology.org/amigo/term/GO:0048863	202	5	1.17307	4.26232	0.00641036	0.257591	1906;2335;6774;6949;65979	ENSG00000168610;ENSG00000115414;ENSG00000070814;ENSG00000204138;ENSG00000078401

## Sheet: Panther
geneSet	description	link	size	overlap	expect	enrichmentRatio	pValue	FDR	overlapId	userId
P00034	Integrin signalling pathway	http://www.pantherdb.org/pathway/pathwayDiagram.jsp?catAccession=P00034	166	5	1.39188	3.59226	0.00993449	0.718902	1277;1281;2335;3673;1296	ENSG00000108821;ENSG00000115414;ENSG00000164171;ENSG00000168542;ENSG00000171812
P04397	p53 pathway by glucose deprivation	http://www.pantherdb.org/pathway/pathwayDiagram.jsp?catAccession=P04397	21	2	0.176081	11.3584	0.0127239	0.718902	208;1978	ENSG00000105221;ENSG00000187840
P00016	Cytoskeletal regulation by Rho GTPase	http://www.pantherdb.org/pathway/pathwayDiagram.jsp?catAccession=P00016	71	3	0.595322	5.03929	0.0199258	0.75054	4627;84617;347733	ENSG00000137285;ENSG00000176014;ENSG00000100345
P00048	PI3 kinase pathway	http://www.pantherdb.org/pathway/pathwayDiagram.jsp?catAccession=P00048	47	2	0.394086	5.07503	0.057562	1	894;208	ENSG00000105221;ENSG00000118971
P00018	EGF receptor signaling pathway	http://www.pantherdb.org/pathway/pathwayDiagram.jsp?catAccession=P00018	115	3	0.964254	3.11121	0.0681816	1	208;6774;81848	ENSG00000105221;ENSG00000168610;ENSG00000187678
P00029	Huntington disease	http://www.pantherdb.org/pathway/pathwayDiagram.jsp?catAccession=P00029	129	3	1.08164	2.77356	0.0896331	1	208;84617;347733	ENSG00000105221;ENSG00000137285;ENSG00000176014
P04393	Ras Pathway	http://www.pantherdb.org/pathway/pathwayDiagram.jsp?catAccession=P04393	70	2	0.586937	3.40752	0.114829	1	5338;6774	ENSG00000168610;ENSG00000129219
P00038	JAK/STAT signaling pathway	http://www.pantherdb.org/pathway/pathwayDiagram.jsp?catAccession=P00038	15	1	0.125772	7.95088	0.118999	1	6774	ENSG00000168610
P00013	Cell cycle	http://www.pantherdb.org/pathway/pathwayDiagram.jsp?catAccession=P00013	16	1	0.134157	7.45395	0.126435	1	894	ENSG00000118971
P00019	Endothelin signaling pathway	http://www.pantherdb.org/pathway/pathwayDiagram.jsp?catAccession=P00019	77	2	0.645631	3.09774	0.13444	1	1906;208	ENSG00000105221;ENSG00000078401
P00036	Interleukin signaling pathway	http://www.pantherdb.org/pathway/pathwayDiagram.jsp?catAccession=P00036	78	2	0.654016	3.05803	0.137306	1	208;6774	ENSG00000105221;ENSG00000168610
P00005	Angiogenesis	http://www.pantherdb.org/pathway/pathwayDiagram.jsp?catAccession=P00005	158	3	1.3248	2.26449	0.141967	1	5338;208;6774	ENSG00000105221;ENSG00000168610;ENSG00000129219
P00017	DNA replication	http://www.pantherdb.org/pathway/pathwayDiagram.jsp?catAccession=P00017	19	1	0.159312	6.27701	0.148388	1	440093	ENSG00000188375
P06959	CCKR signaling map	http://www.pantherdb.org/pathway/pathwayDiagram.jsp?catAccession=P06959	172	3	1.44219	2.08017	0.170429	1	6774;1978;51564	ENSG00000168610;ENSG00000187840;ENSG00000061273
P00030	Hypoxia response via HIF activation	http://www.pantherdb.org/pathway/pathwayDiagram.jsp?catAccession=P00030	26	1	0.218005	4.58704	0.197599	1	208	ENSG00000105221
P00021	FGF signaling pathway	http://www.pantherdb.org/pathway/pathwayDiagram.jsp?catAccession=P00021	104	2	0.872021	2.29352	0.215836	1	208;81848	ENSG00000105221;ENSG00000187678
P00006	Apoptosis signaling pathway	http://www.pantherdb.org/pathway/pathwayDiagram.jsp?catAccession=P00006	108	2	0.90556	2.20858	0.228391	1	468;208	ENSG00000105221;ENSG00000128272
P00031	Inflammation mediated by chemokine and cytokine signaling pathway	http://www.pantherdb.org/pathway/pathwayDiagram.jsp?catAccession=P00031	200	3	1.67696	1.78895	0.231996	1	208;4627;6774	ENSG00000105221;ENSG00000168610;ENSG00000100345
P05918	p38 MAPK pathway	http://www.pantherdb.org/pathway/pathwayDiagram.jsp?catAccession=P05918	34	1	0.285084	3.50774	0.250538	1	1978	ENSG00000187840
P00033	Insulin/IGF pathway-protein kinase B signaling cascade	http://www.pantherdb.org/pathway/pathwayDiagram.jsp?catAccession=P00033	35	1	0.293469	3.40752	0.256918	1	208	ENSG00000105221

## Sheet: GeneMANIA
Function	FDR	Genes in network	Genes in genome
cytosolic ribosome	6.66575e-21	20	100
cotranslational protein targeting to membrane	9.16848e-19	18	90
protein targeting to ER	3.18981e-18	18	98
establishment of protein localization to endoplasmic reticulum	1.74867e-17	18	110
ribosomal subunit	1.74867e-17	21	182
protein targeting to membrane	3.39385e-17	19	138
ribosome	6.27028e-17	21	198
protein localization to endoplasmic reticulum	2.92971e-16	18	131
viral gene expression	9.13204e-16	20	196
cytosol	4.76017e-15	20	214
nuclear-transcribed mRNA catabolic process	2.38592e-14	19	200
large ribosomal subunit	1.37819e-07	11	112
ribosome biogenesis	5.11013e-07	14	247
small ribosomal subunit	6.49616e-07	9	71
ribosomal large subunit biogenesis	3.17362e-05	7	51
ribosome assembly	3.42086e-05	7	52
ribonucleoprotein complex assembly	0.000116344	10	172
ribonucleoprotein complex subunit organization	0.000168233	10	180
banded collagen fibril	0.000433254	4	11
extracellular matrix structural constituent	0.000635226	6	51
collagen trimer	0.000635226	5	28
complex of collagen trimers	0.00423219	4	19
collagen-containing extracellular matrix	0.00802184	6	80
fibrillar collagen trimer	0.0210388	3	10
rRNA metabolic process	0.0212644	8	196
polysome	0.0240421	4	30
blood coagulation	0.0891445	7	181
