# Supplementary material for: Cannabidiol (CBD) modulates the transcriptional profile of ethanol-exposed human dermal fibroblast cells
Source: J Appl Genet. 2024 Oct 28;65(4):773–96. doi: 10.1007/s13353-024-00915-7 (PMC11561130; doi:10.1007/s13353-024-00915-7)
Supplement: Supplementary file 13 — Supplementary file13 (XLSX 8 KB) [file 13353_2024_915_MOESM13_ESM.xlsx]

## Sheet: Correlation
	Corrleation			Pearson
				r	Significnace	p
Samples	qPCR	-	RNA-Seq	0.465	***	1.225e -4
Groups	qPCR	-	RNA-Seq	0.48	*	0.011
* p < .05, ** p < .01, *** p < .001
